# Supplementary material
Source: PubMed Central journal article supplement (PMC4159650)

Q9DB77 : NALANPLYCPDYR

parent: 783.871230,2+

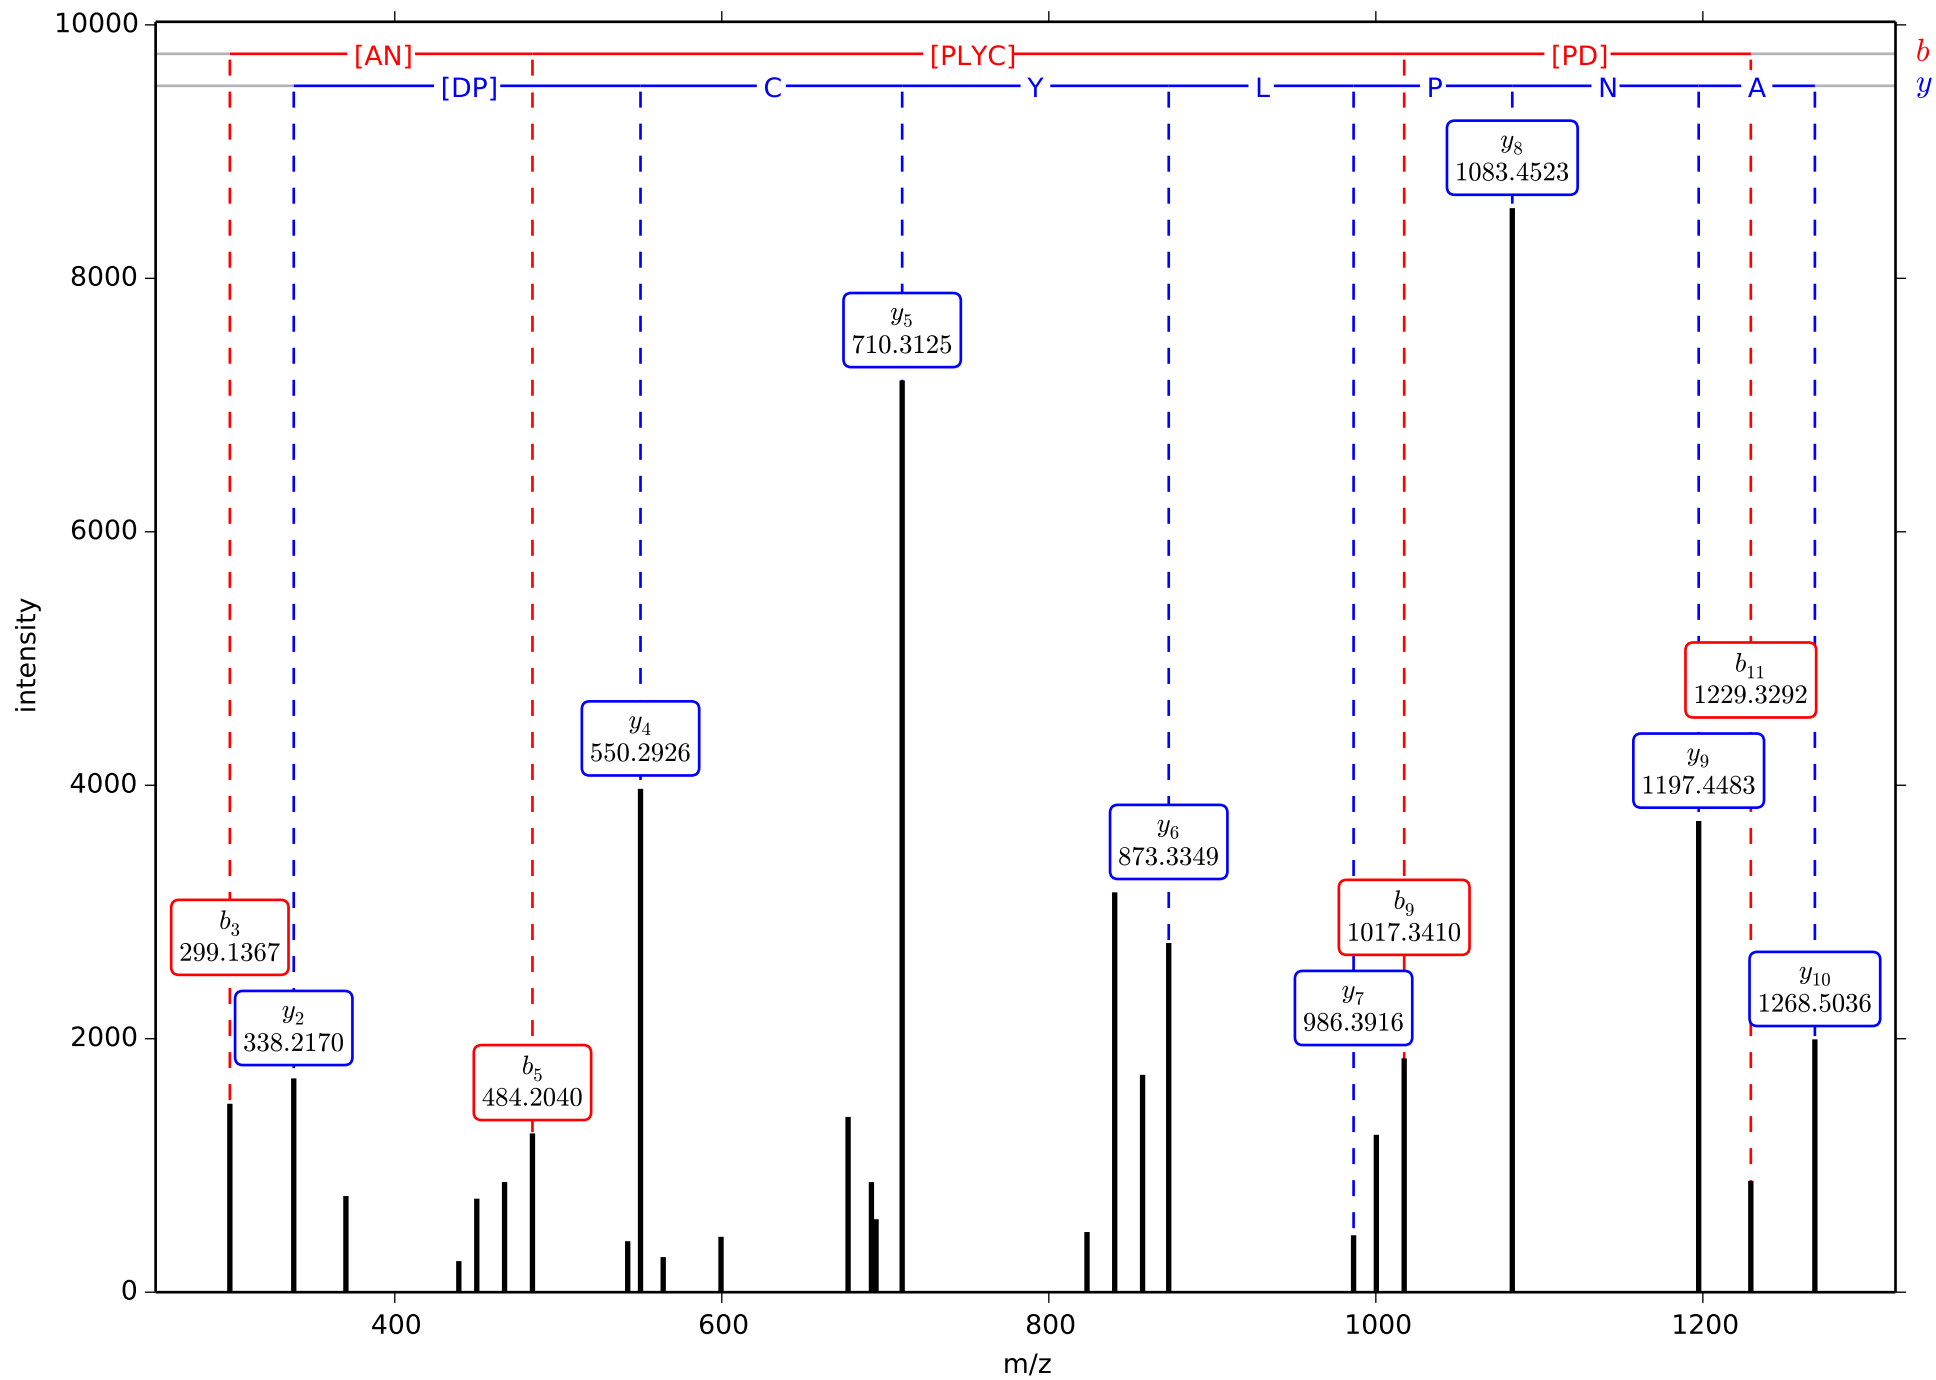

# Q9DCX2 : SCAEFVSGSQLR

parent: 670.813220,2+

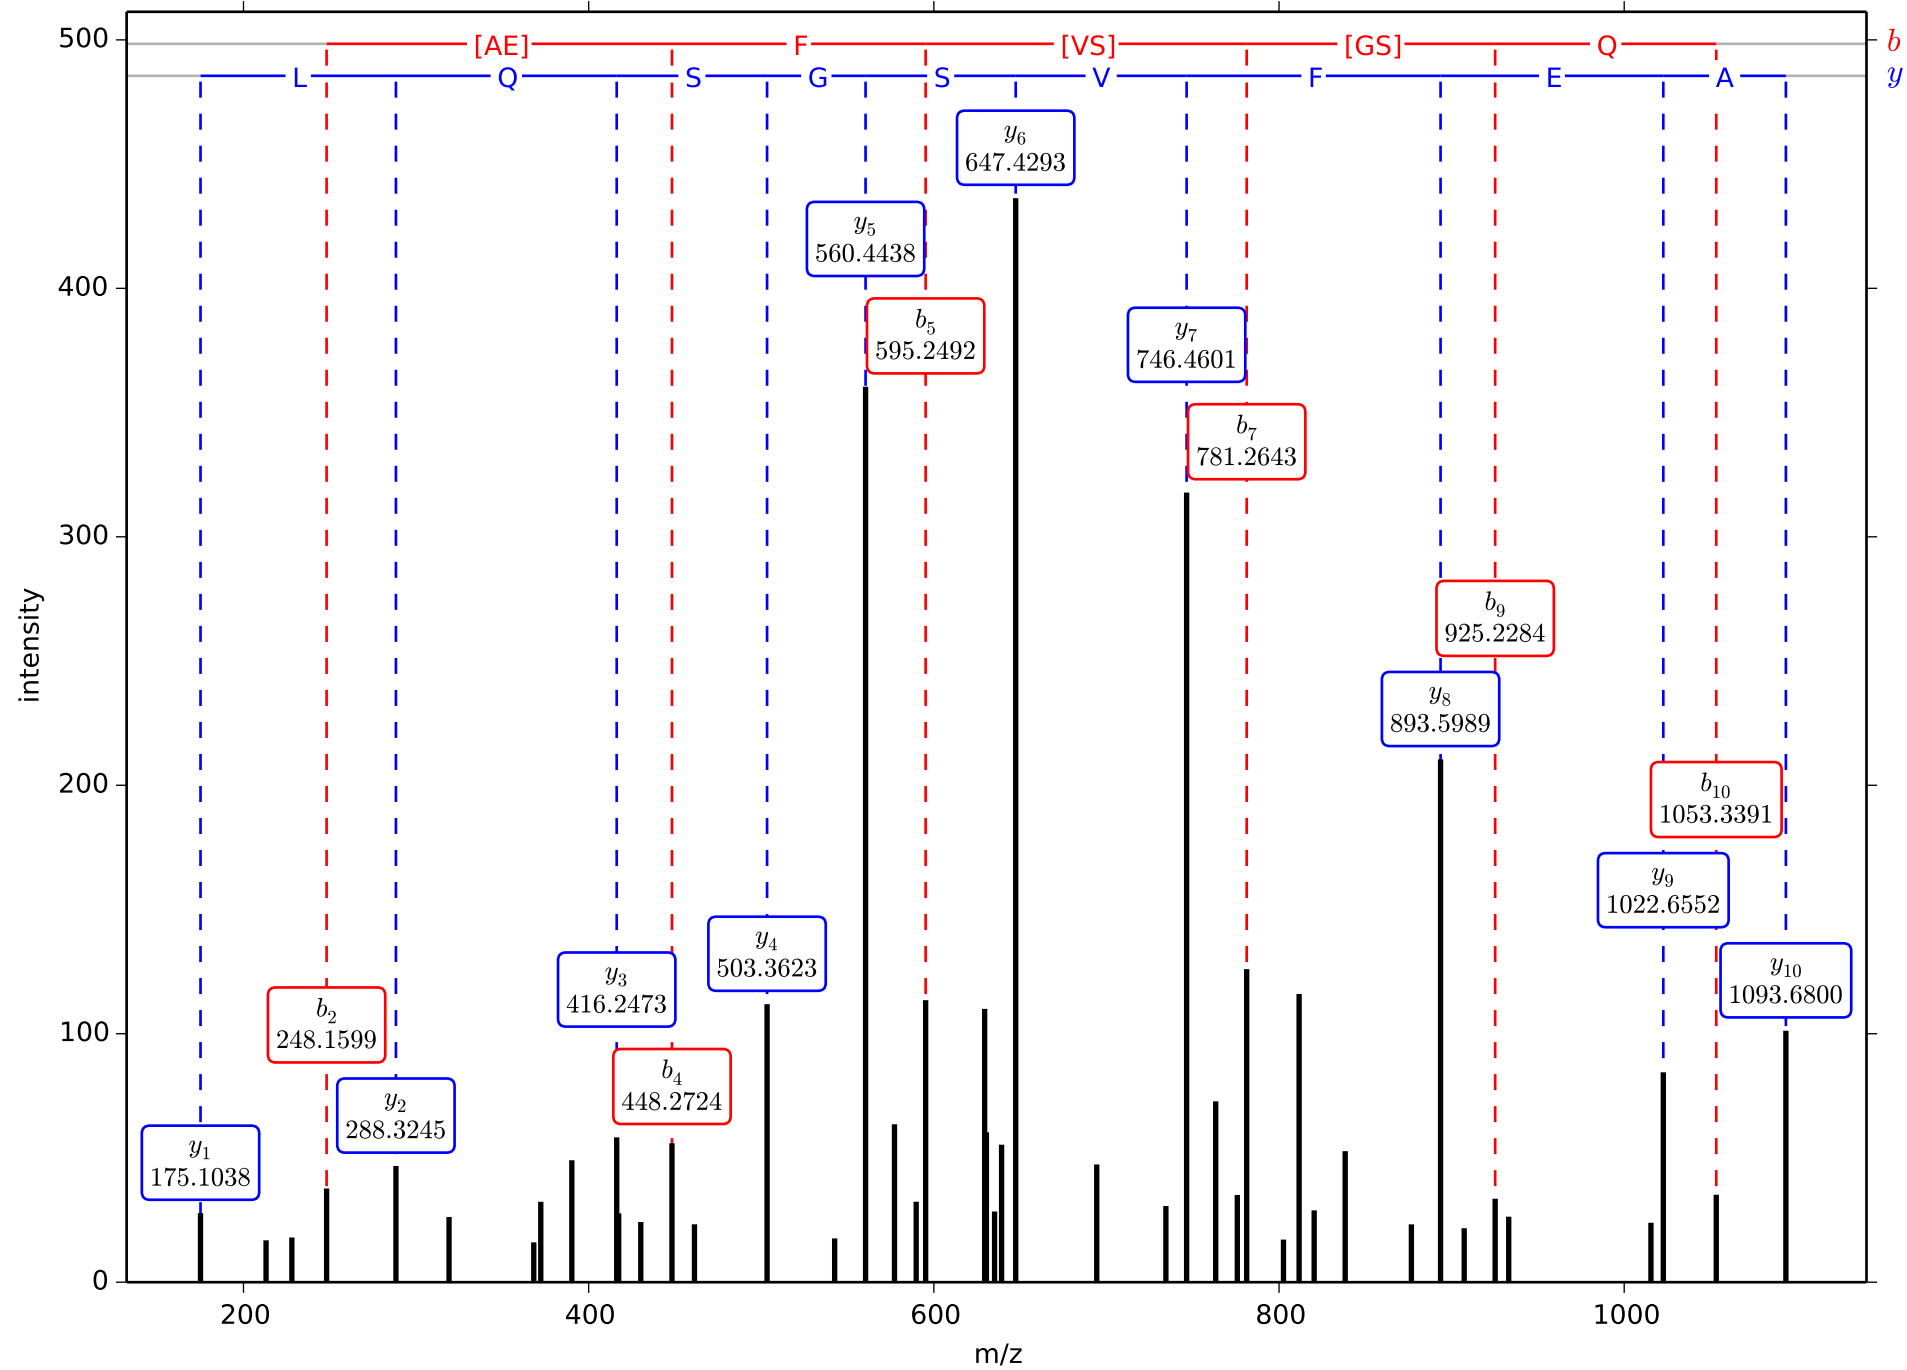

P56375 : SVDYEVFGTVQGVCFR

parent: 931.954060,2+

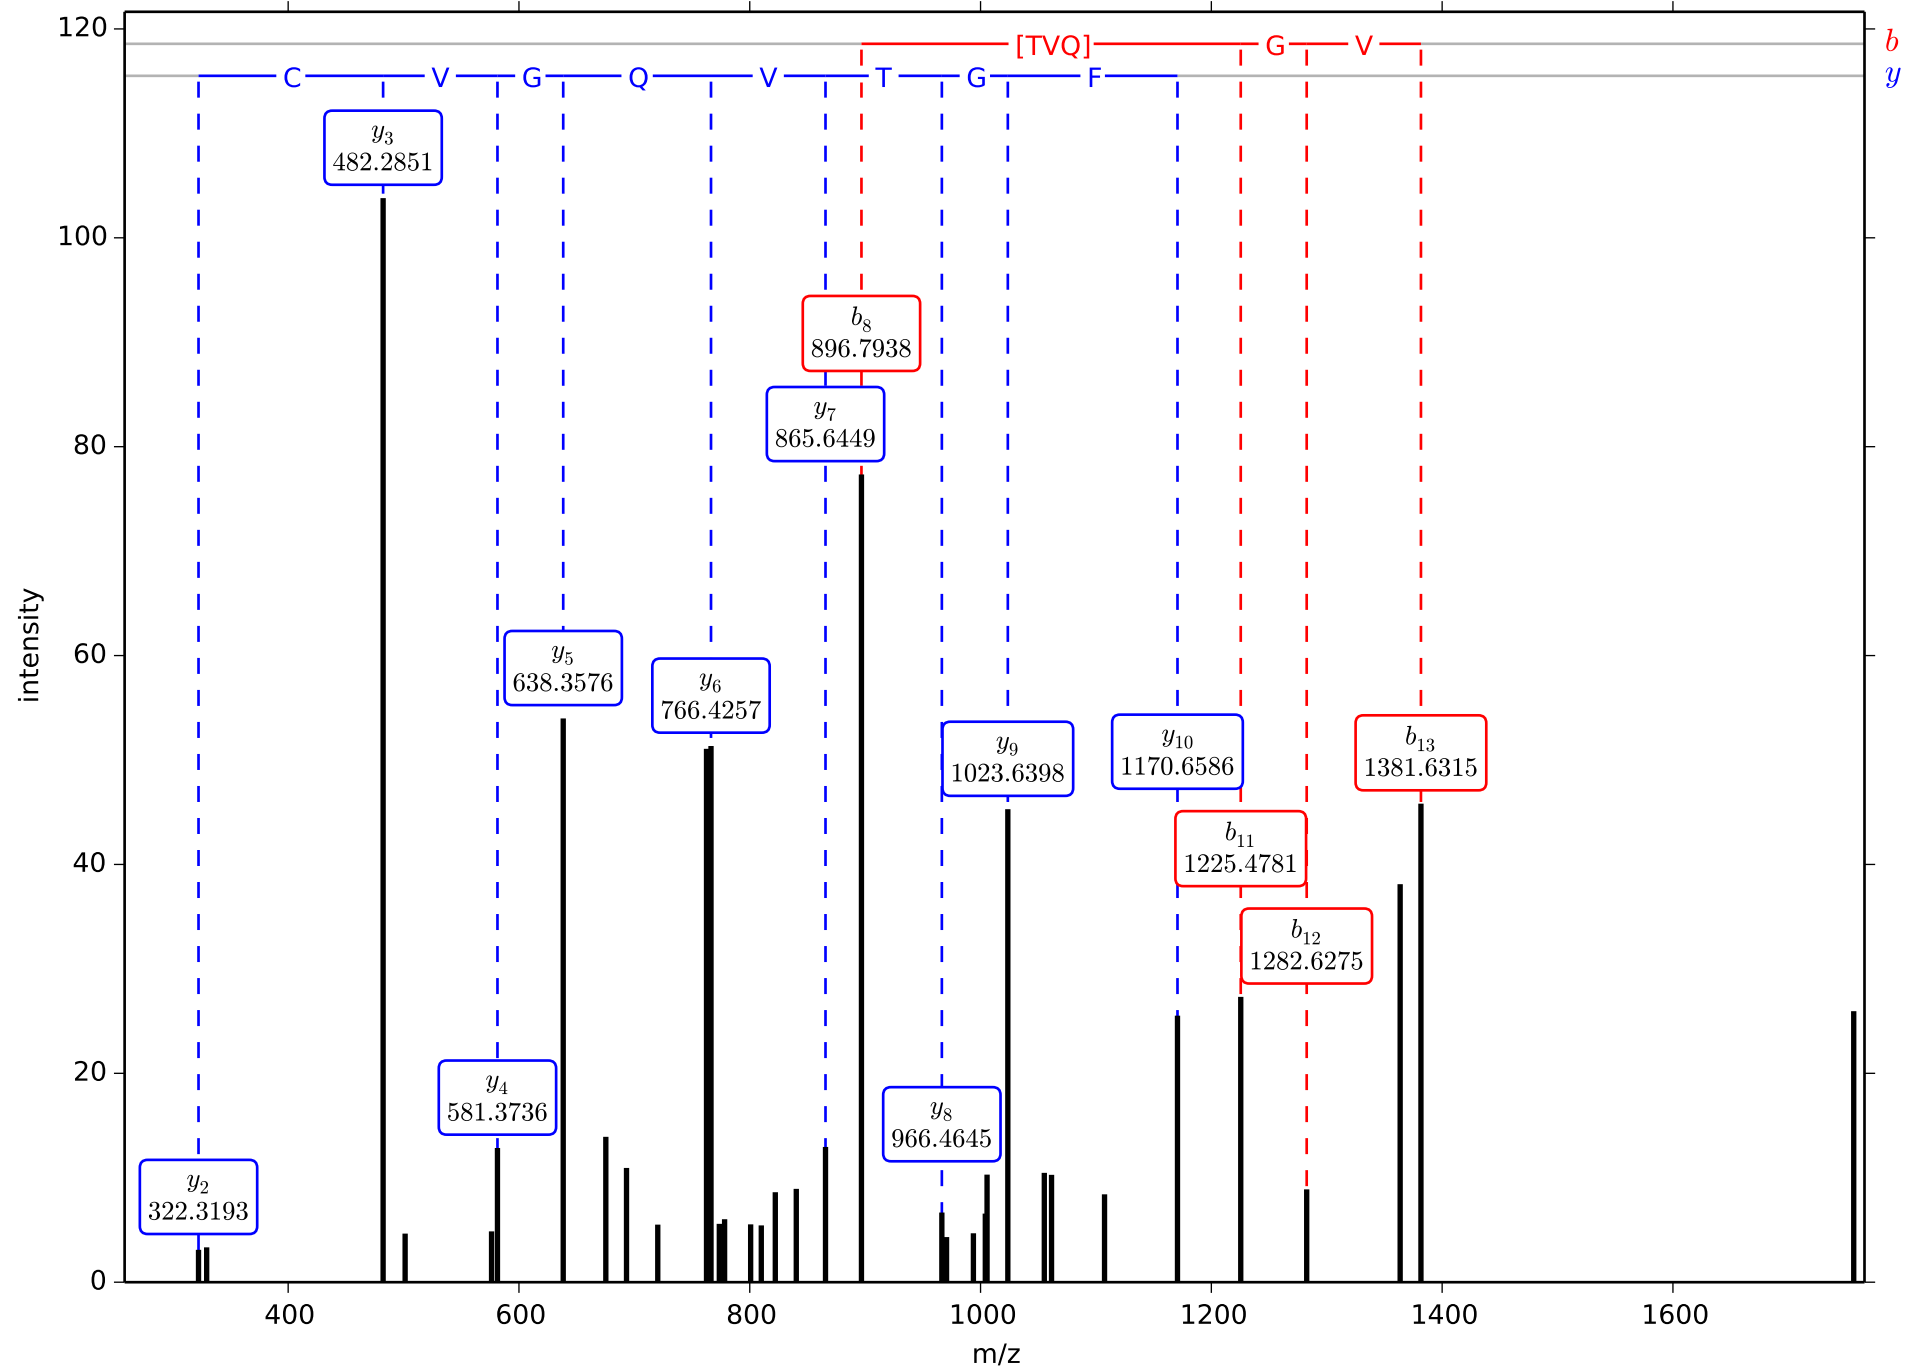

P03995 : QLQALTCDLESLR

parent: 773.895320,2+

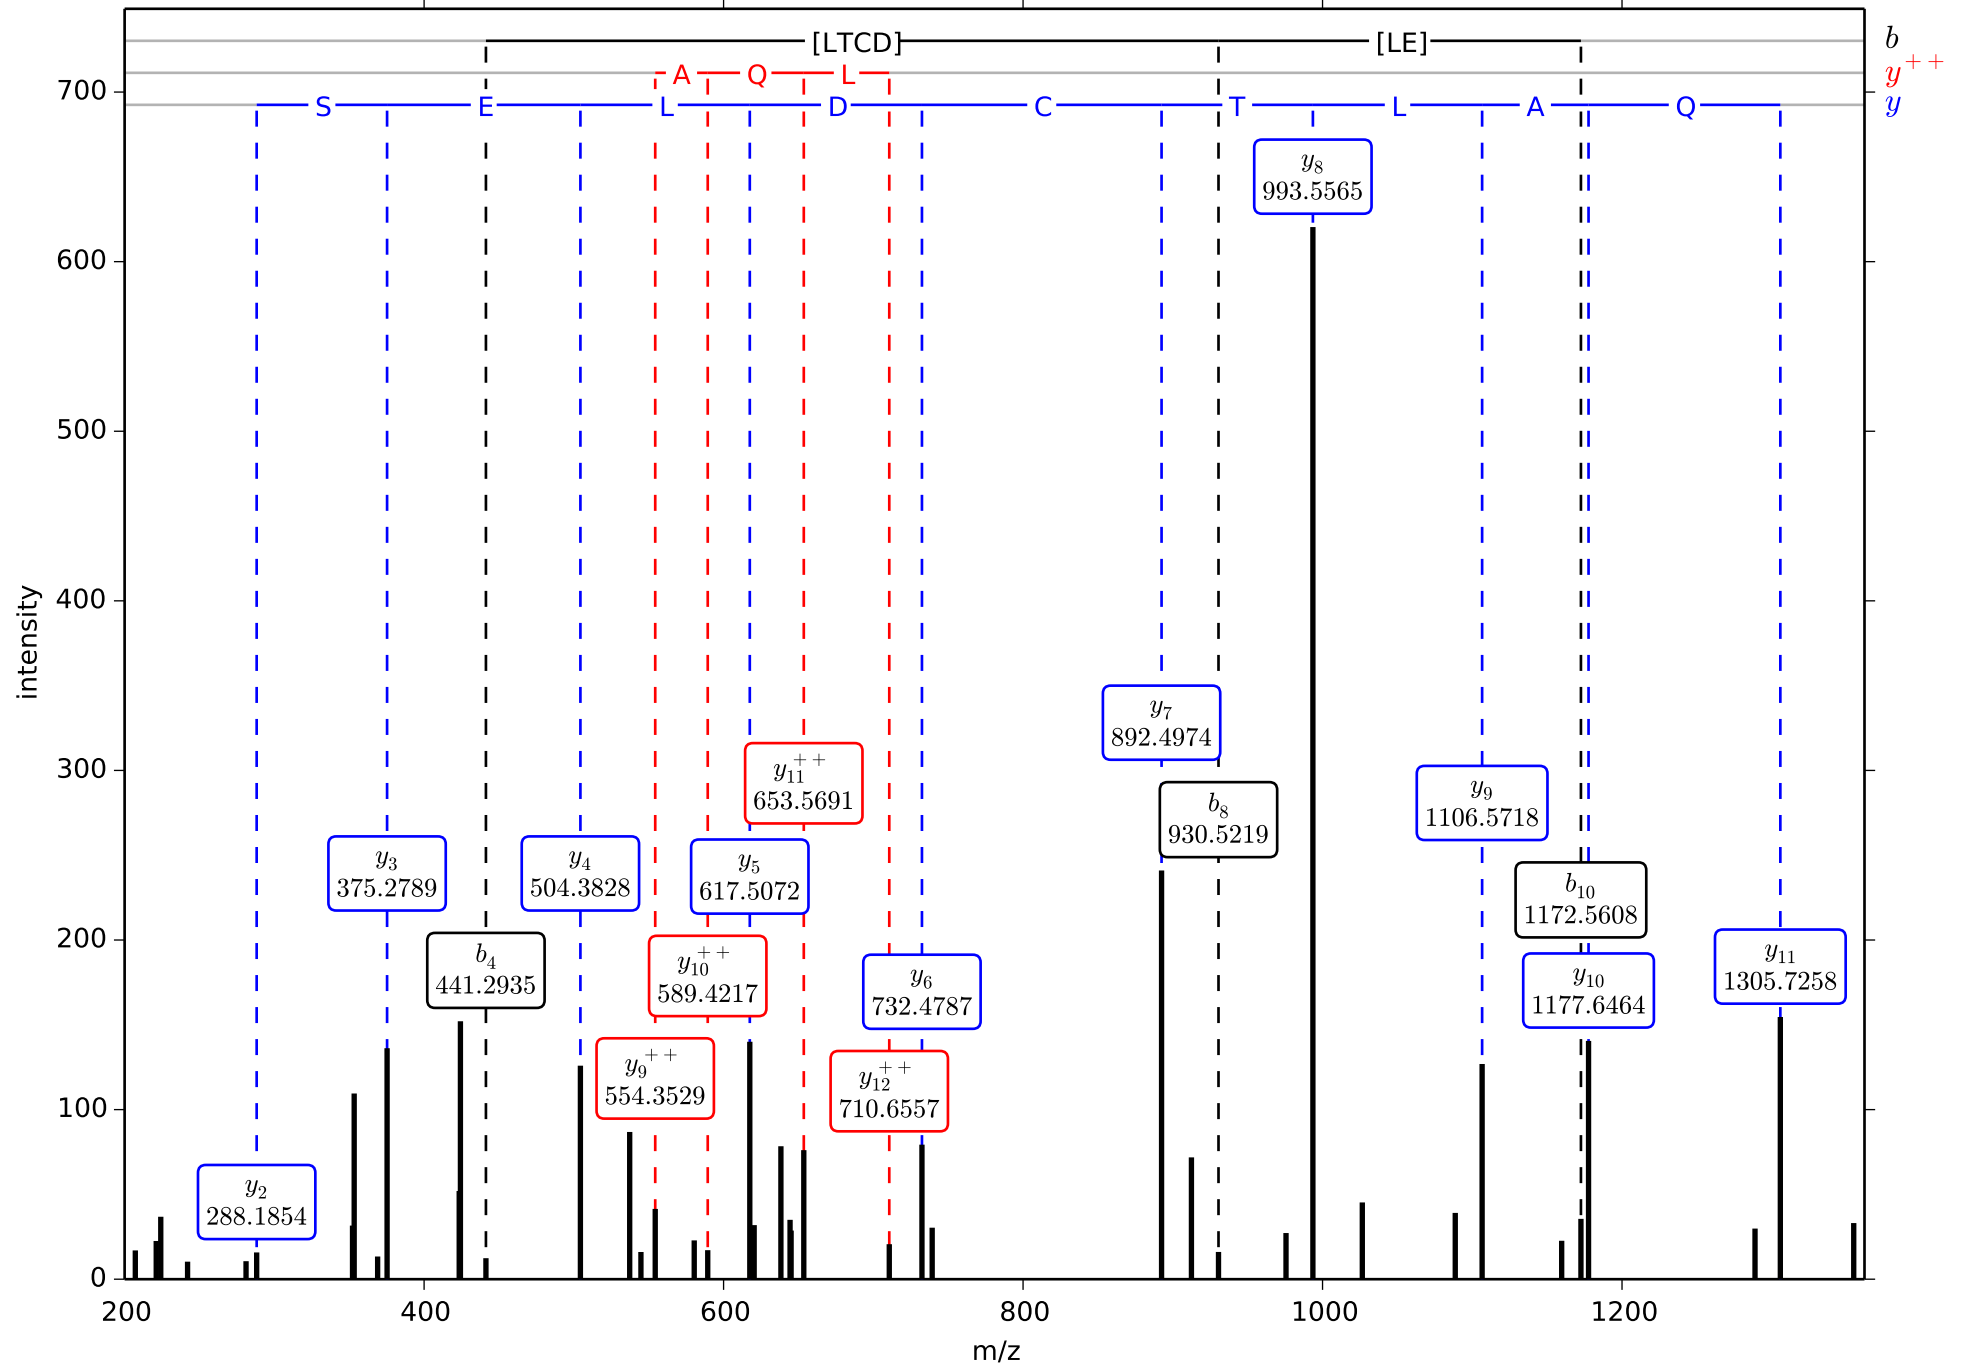

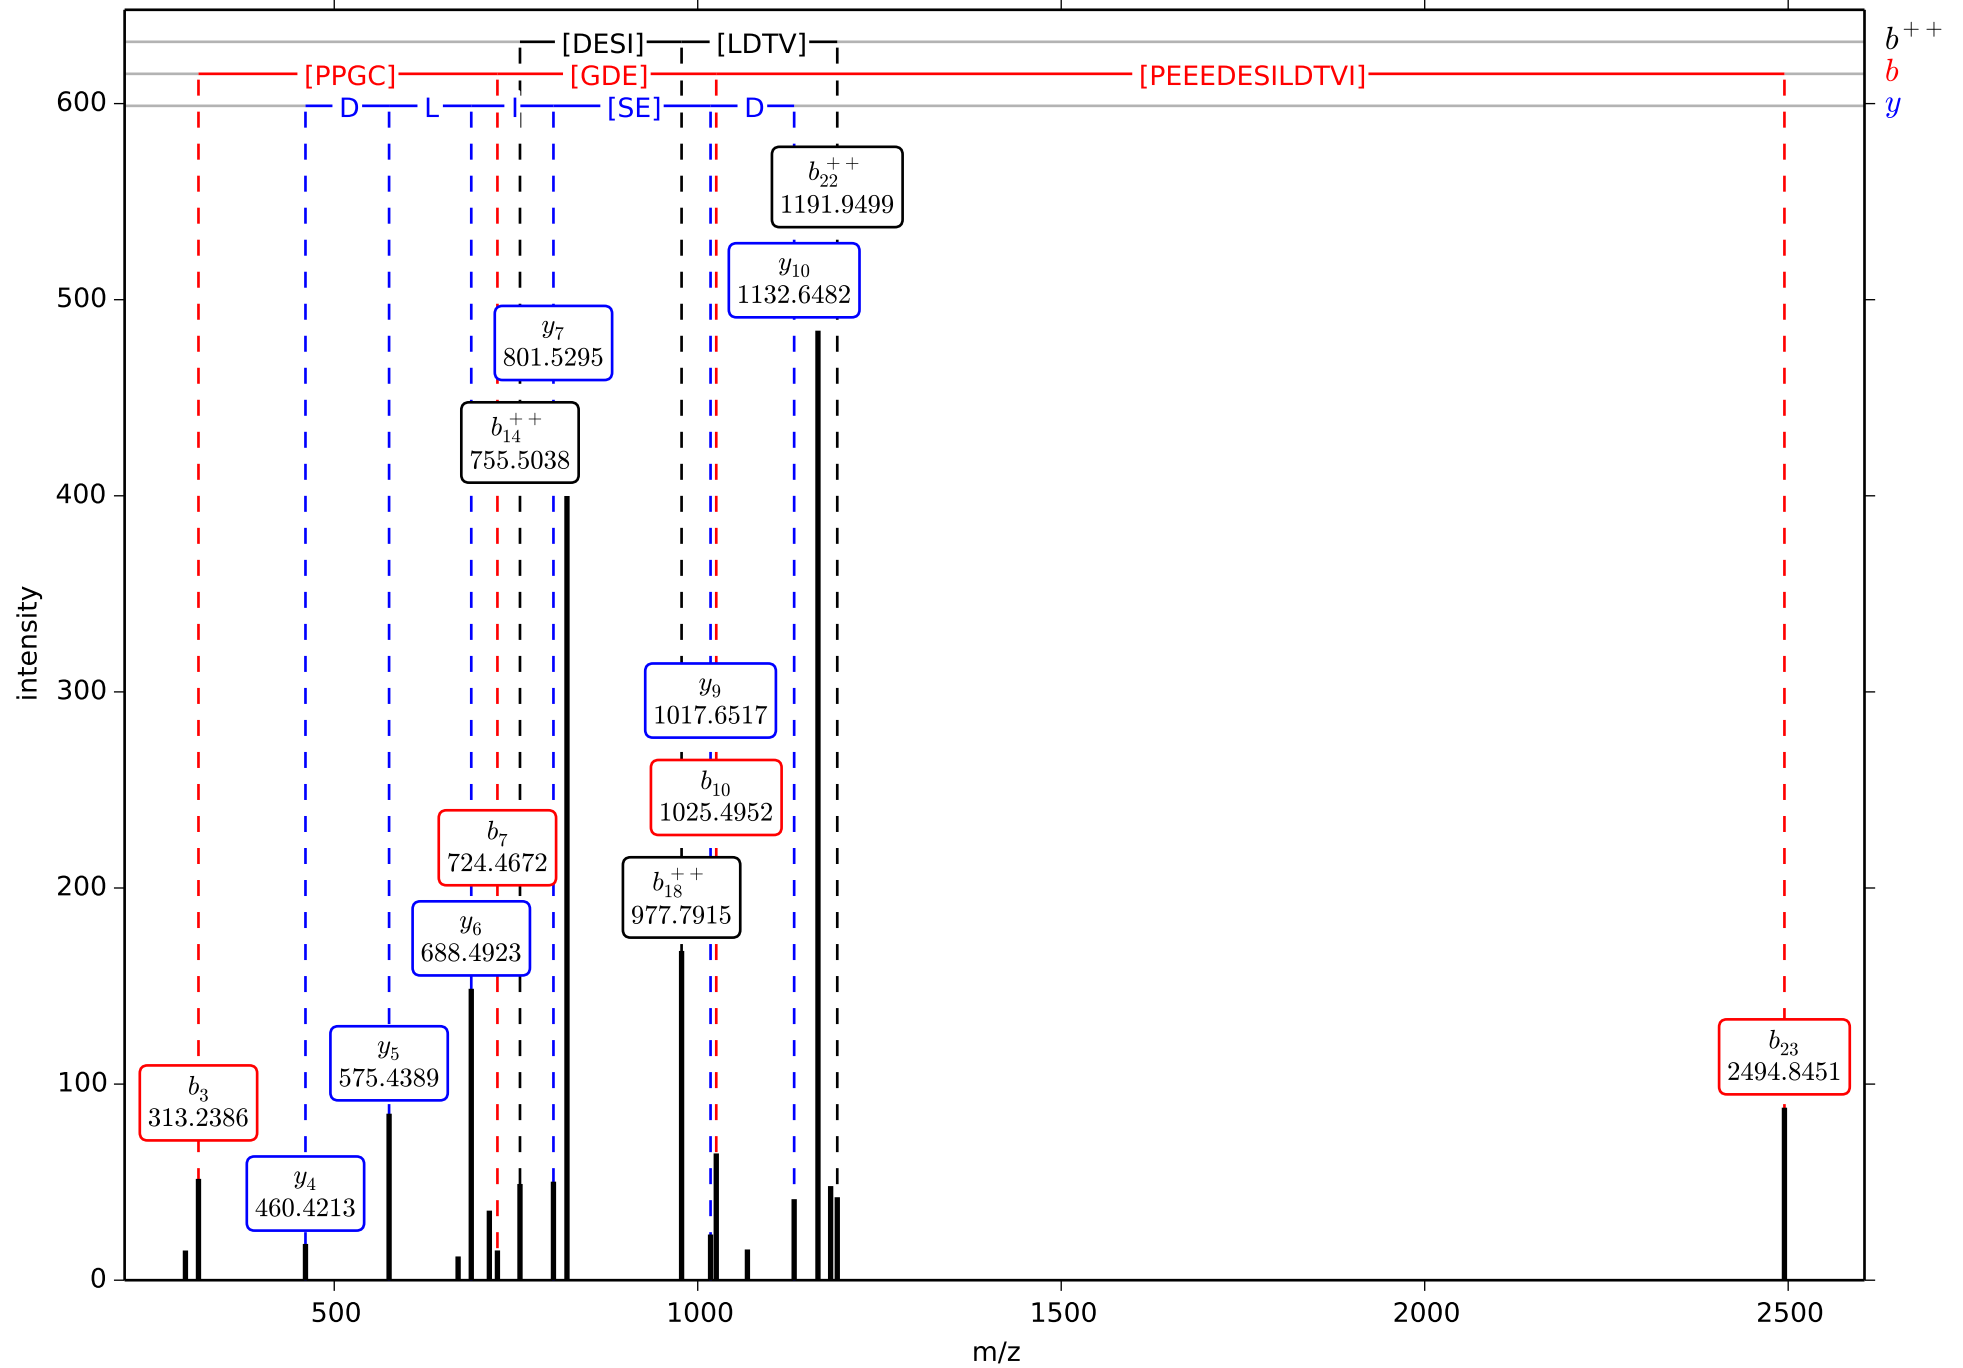

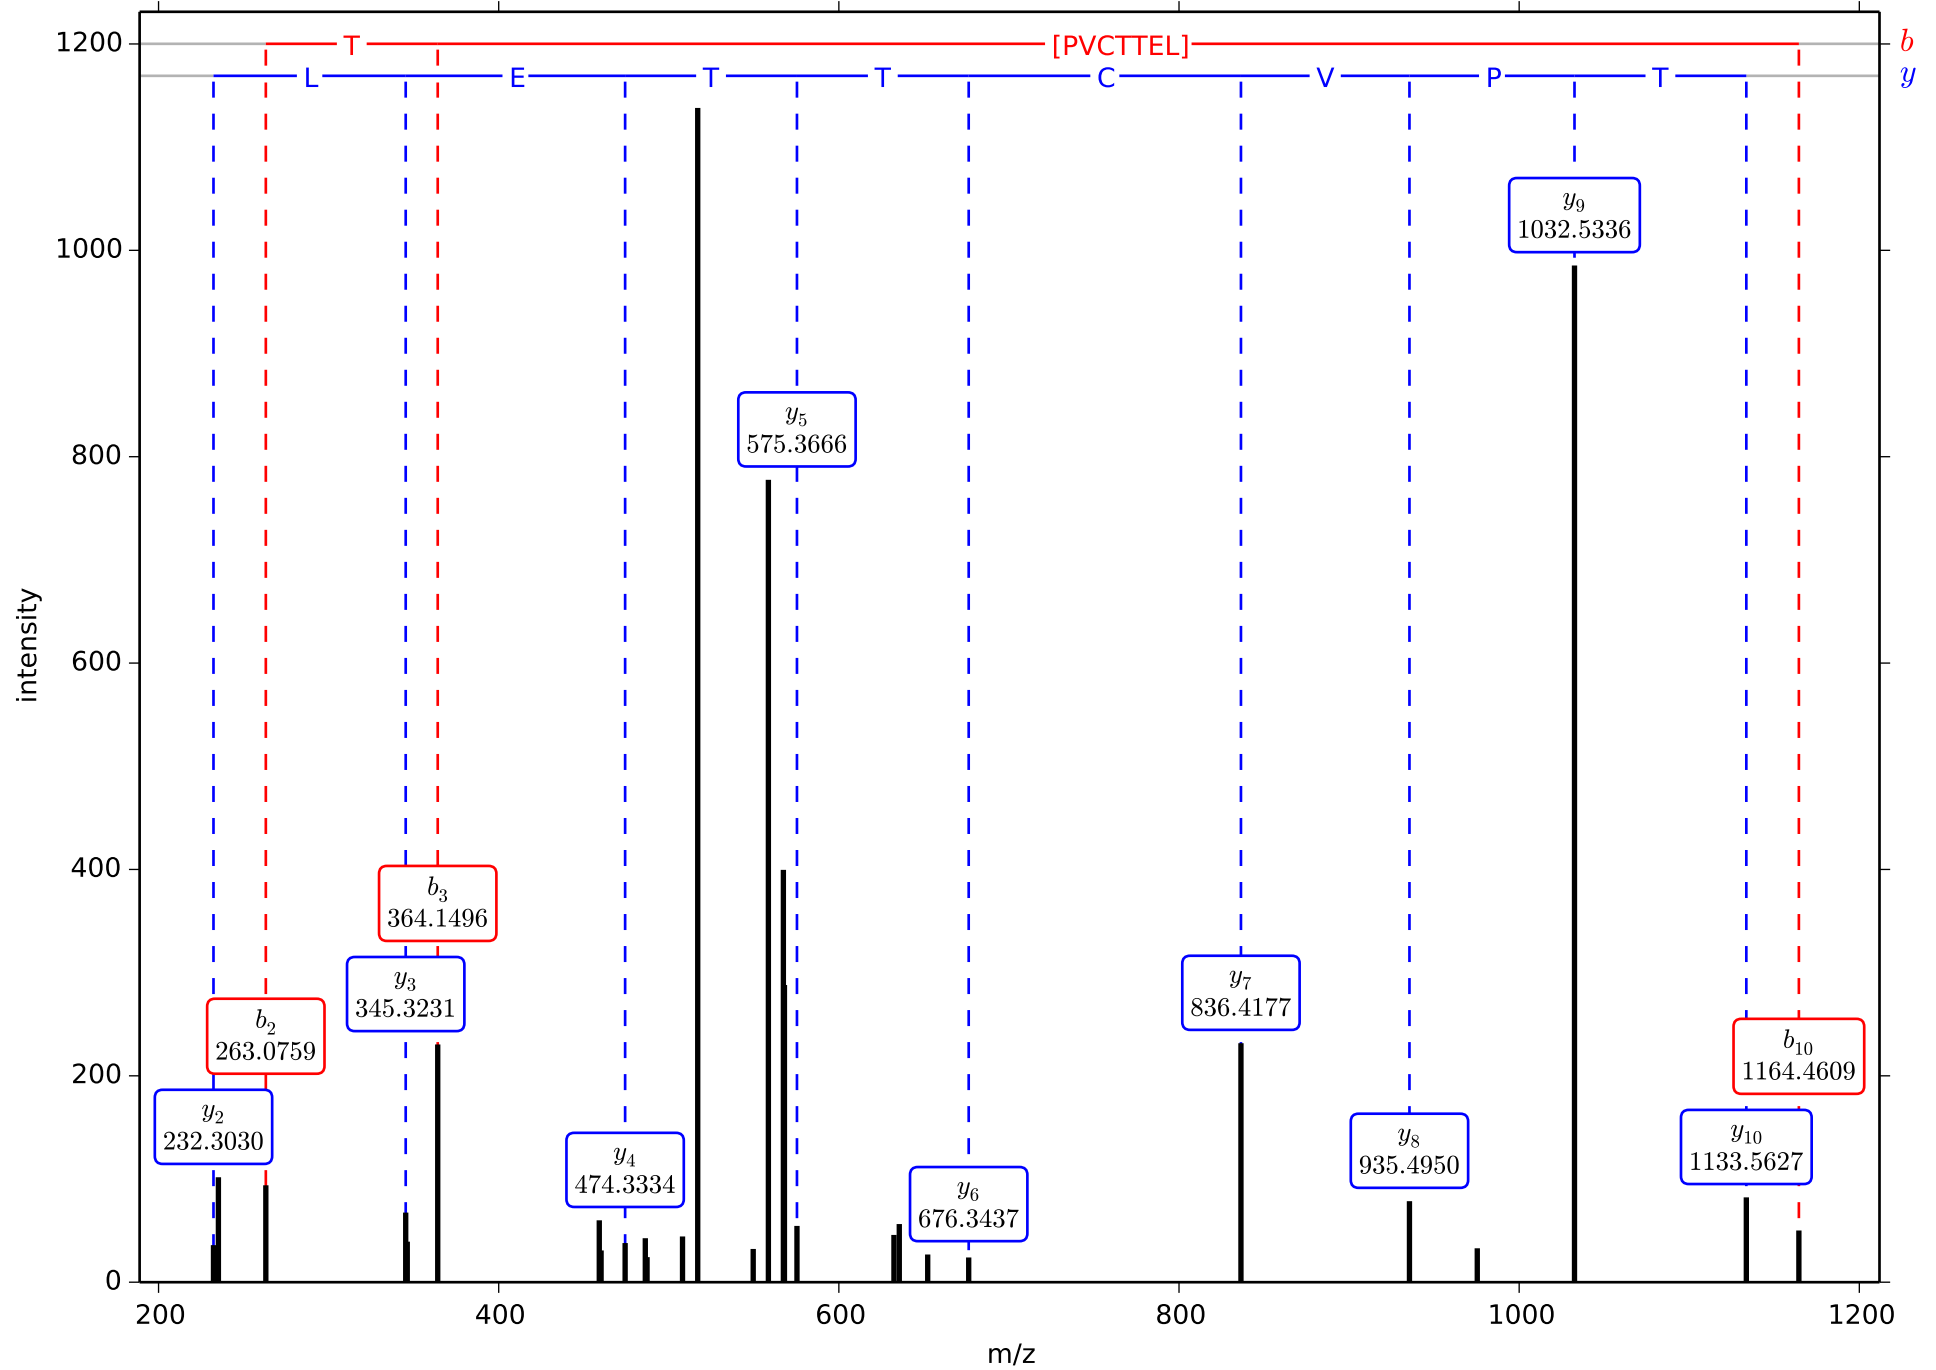

P62748 : LLQCDPSSASQF

parent: 676.808580,2+

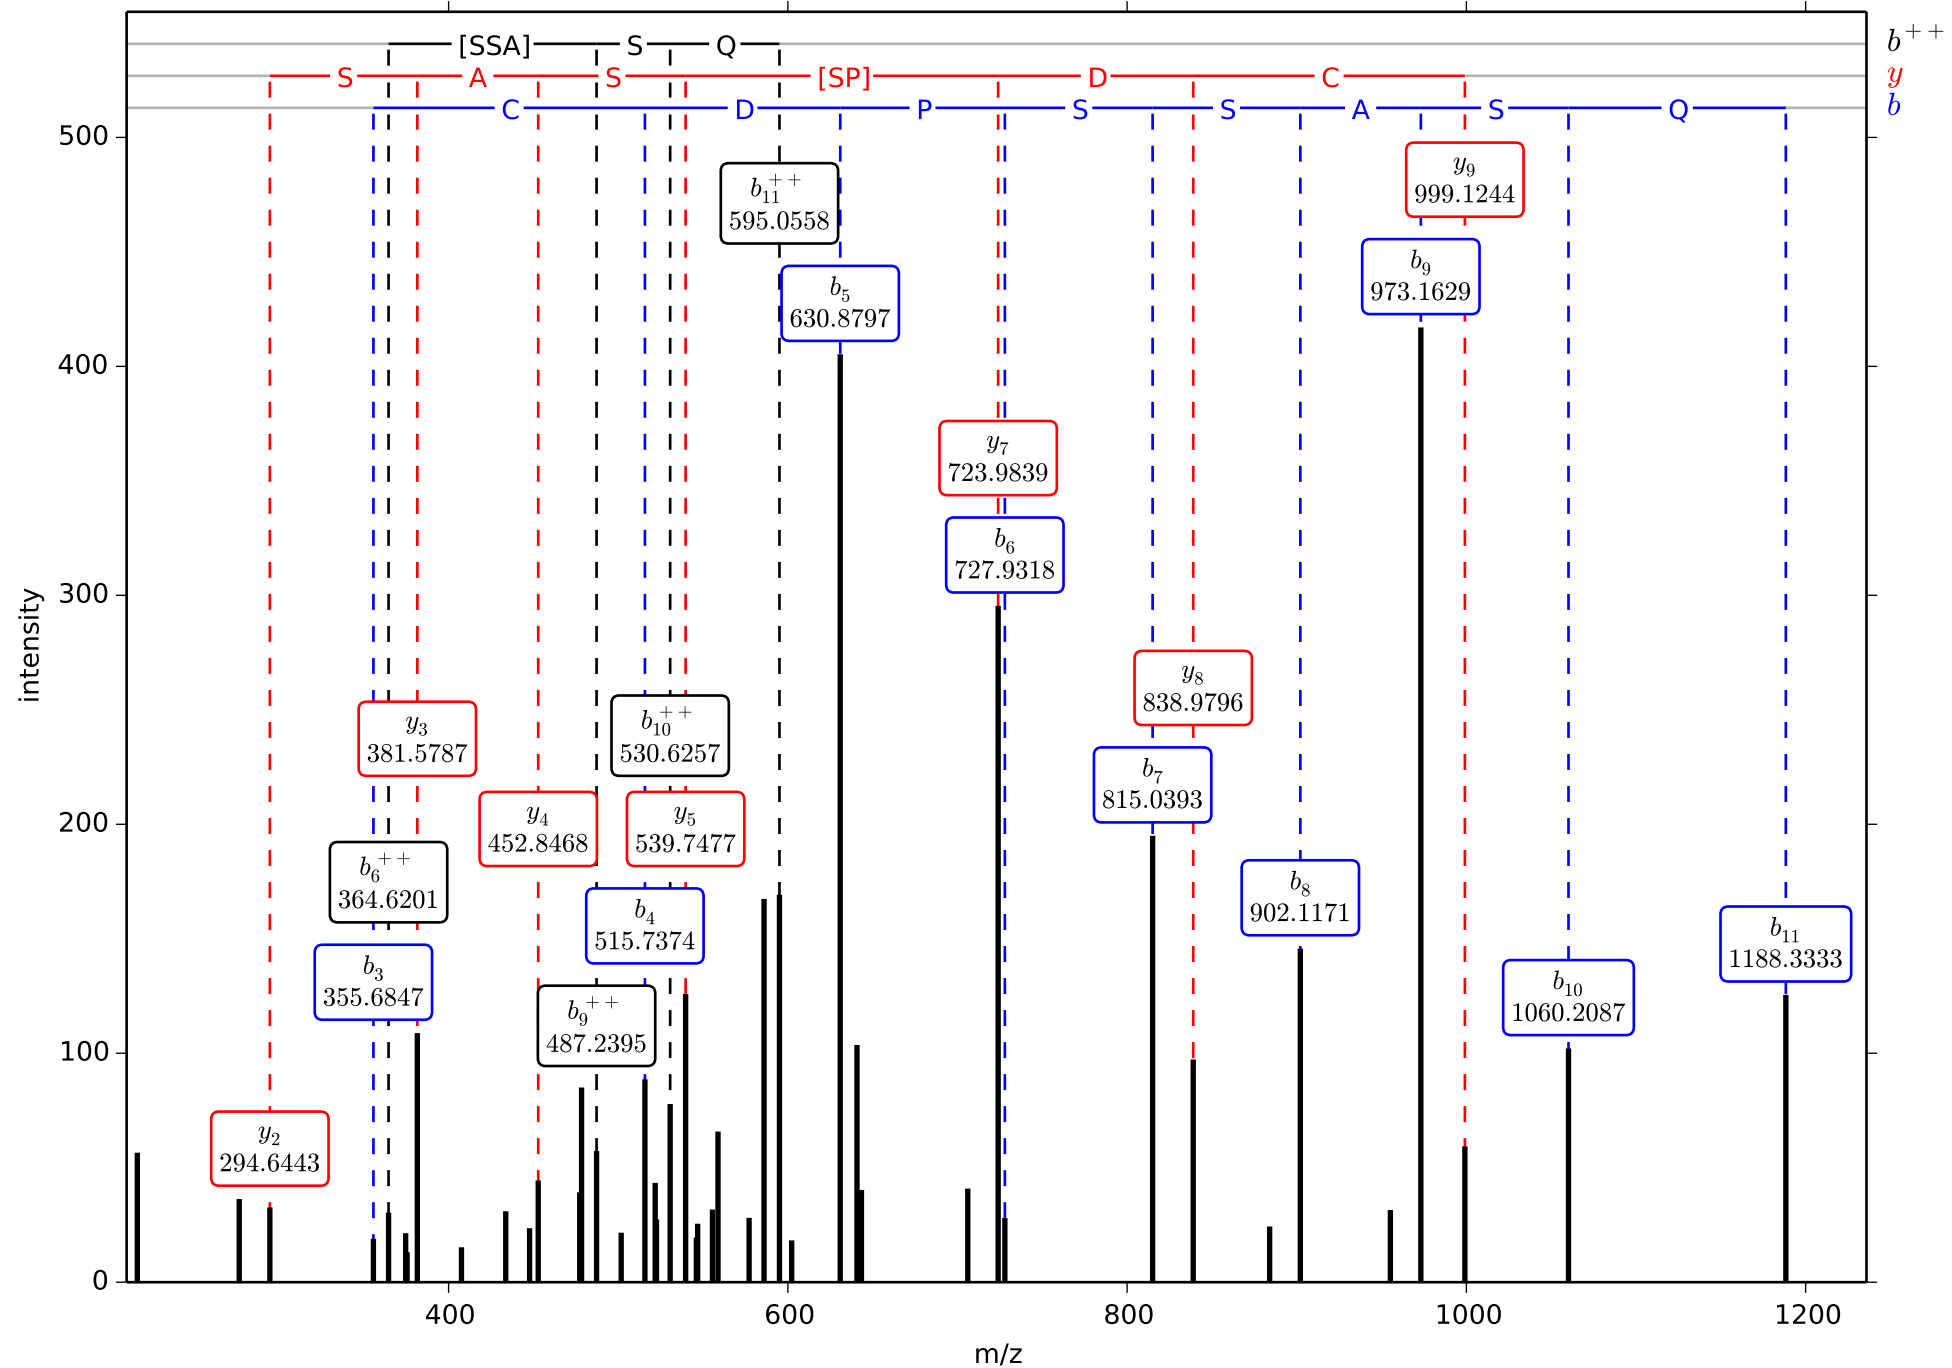

# Q6IRU5 : VAQLCDFNPK

parent: 596.293680,2+

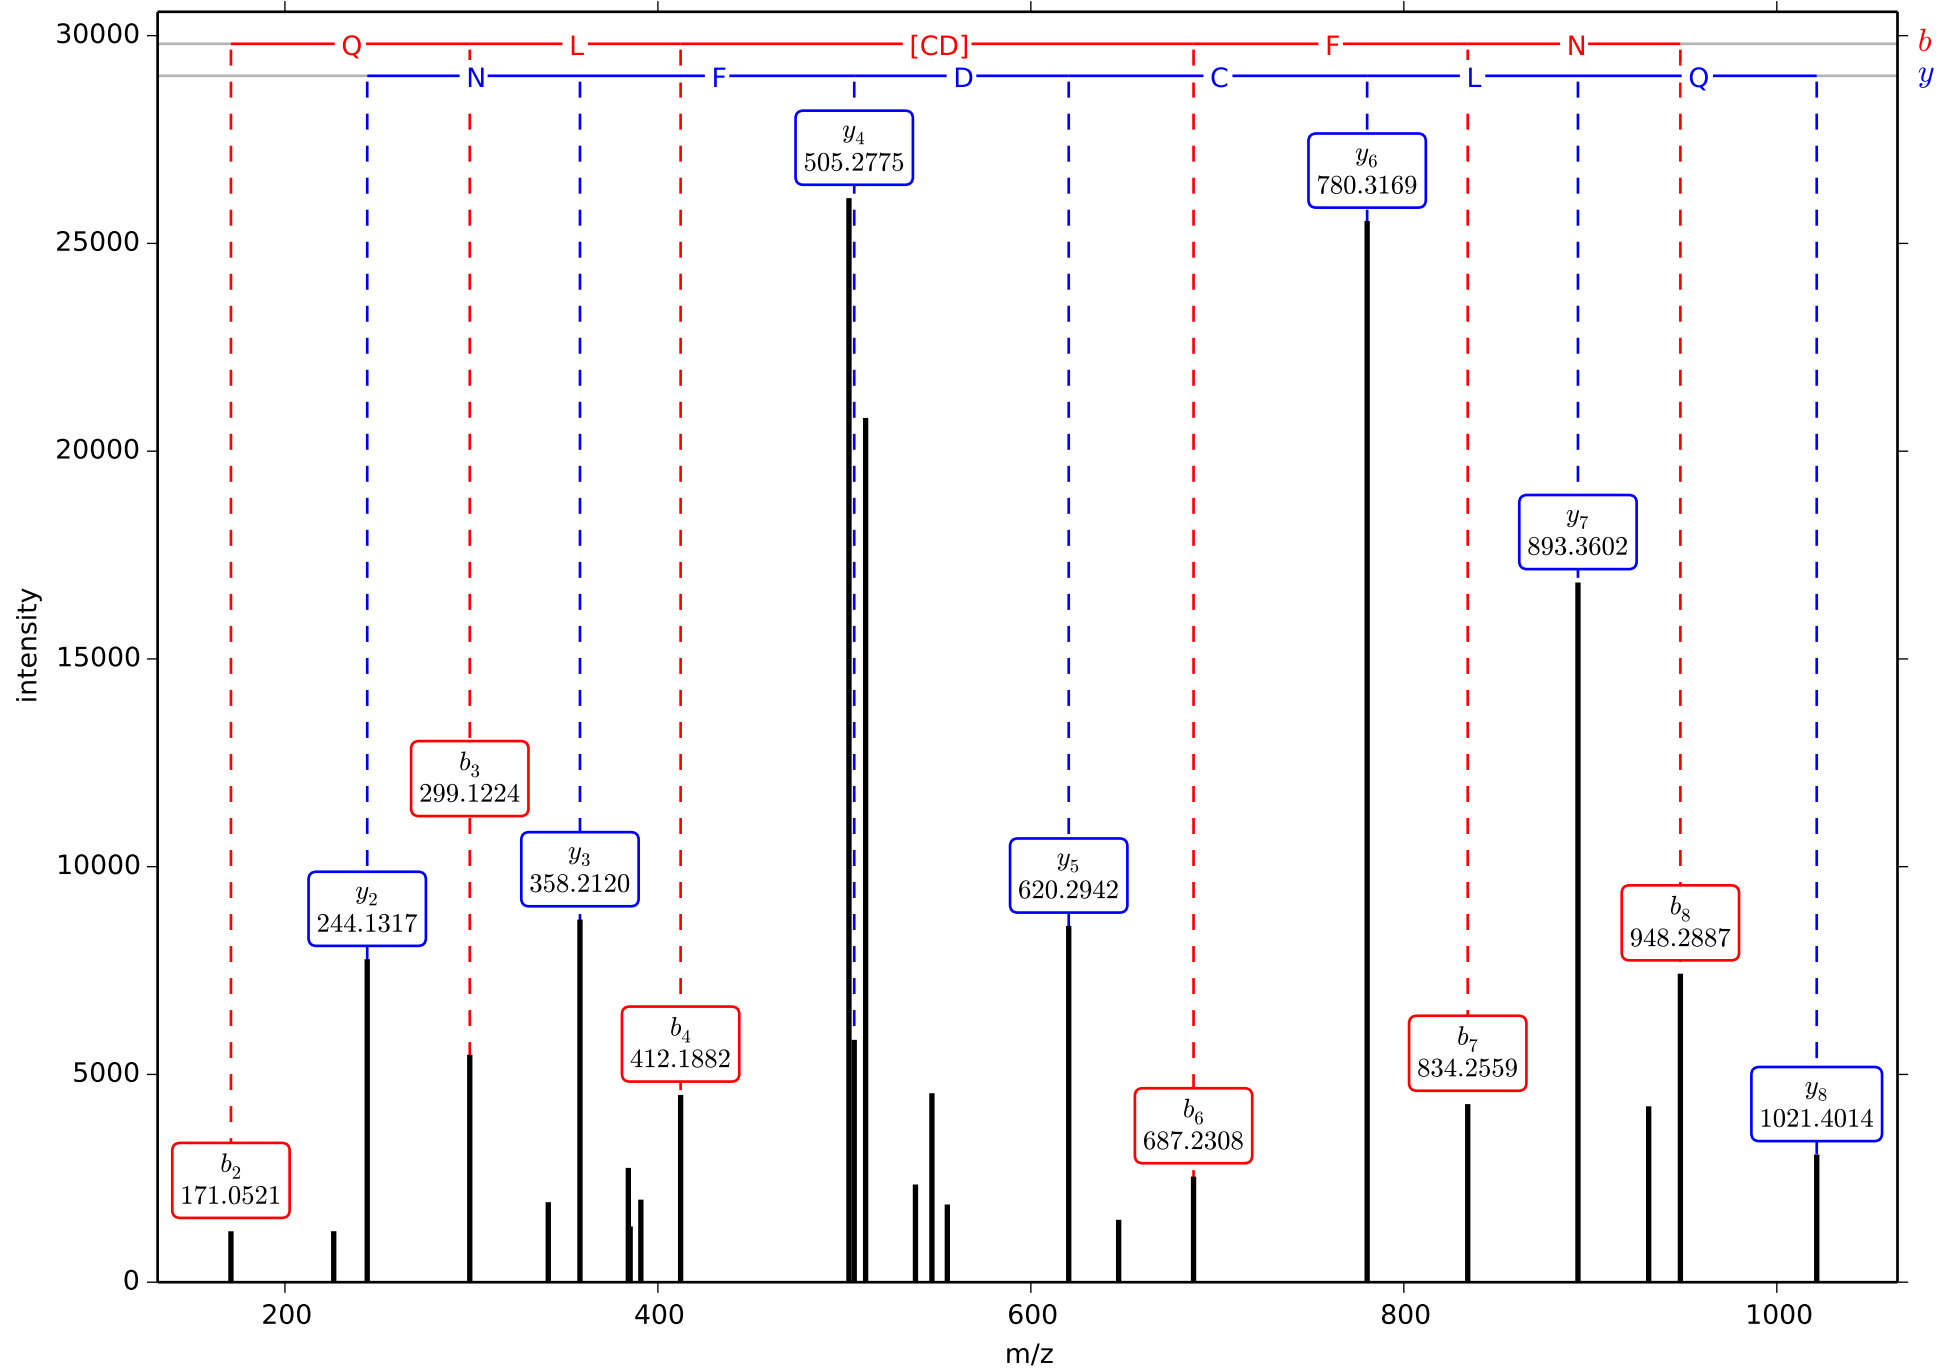



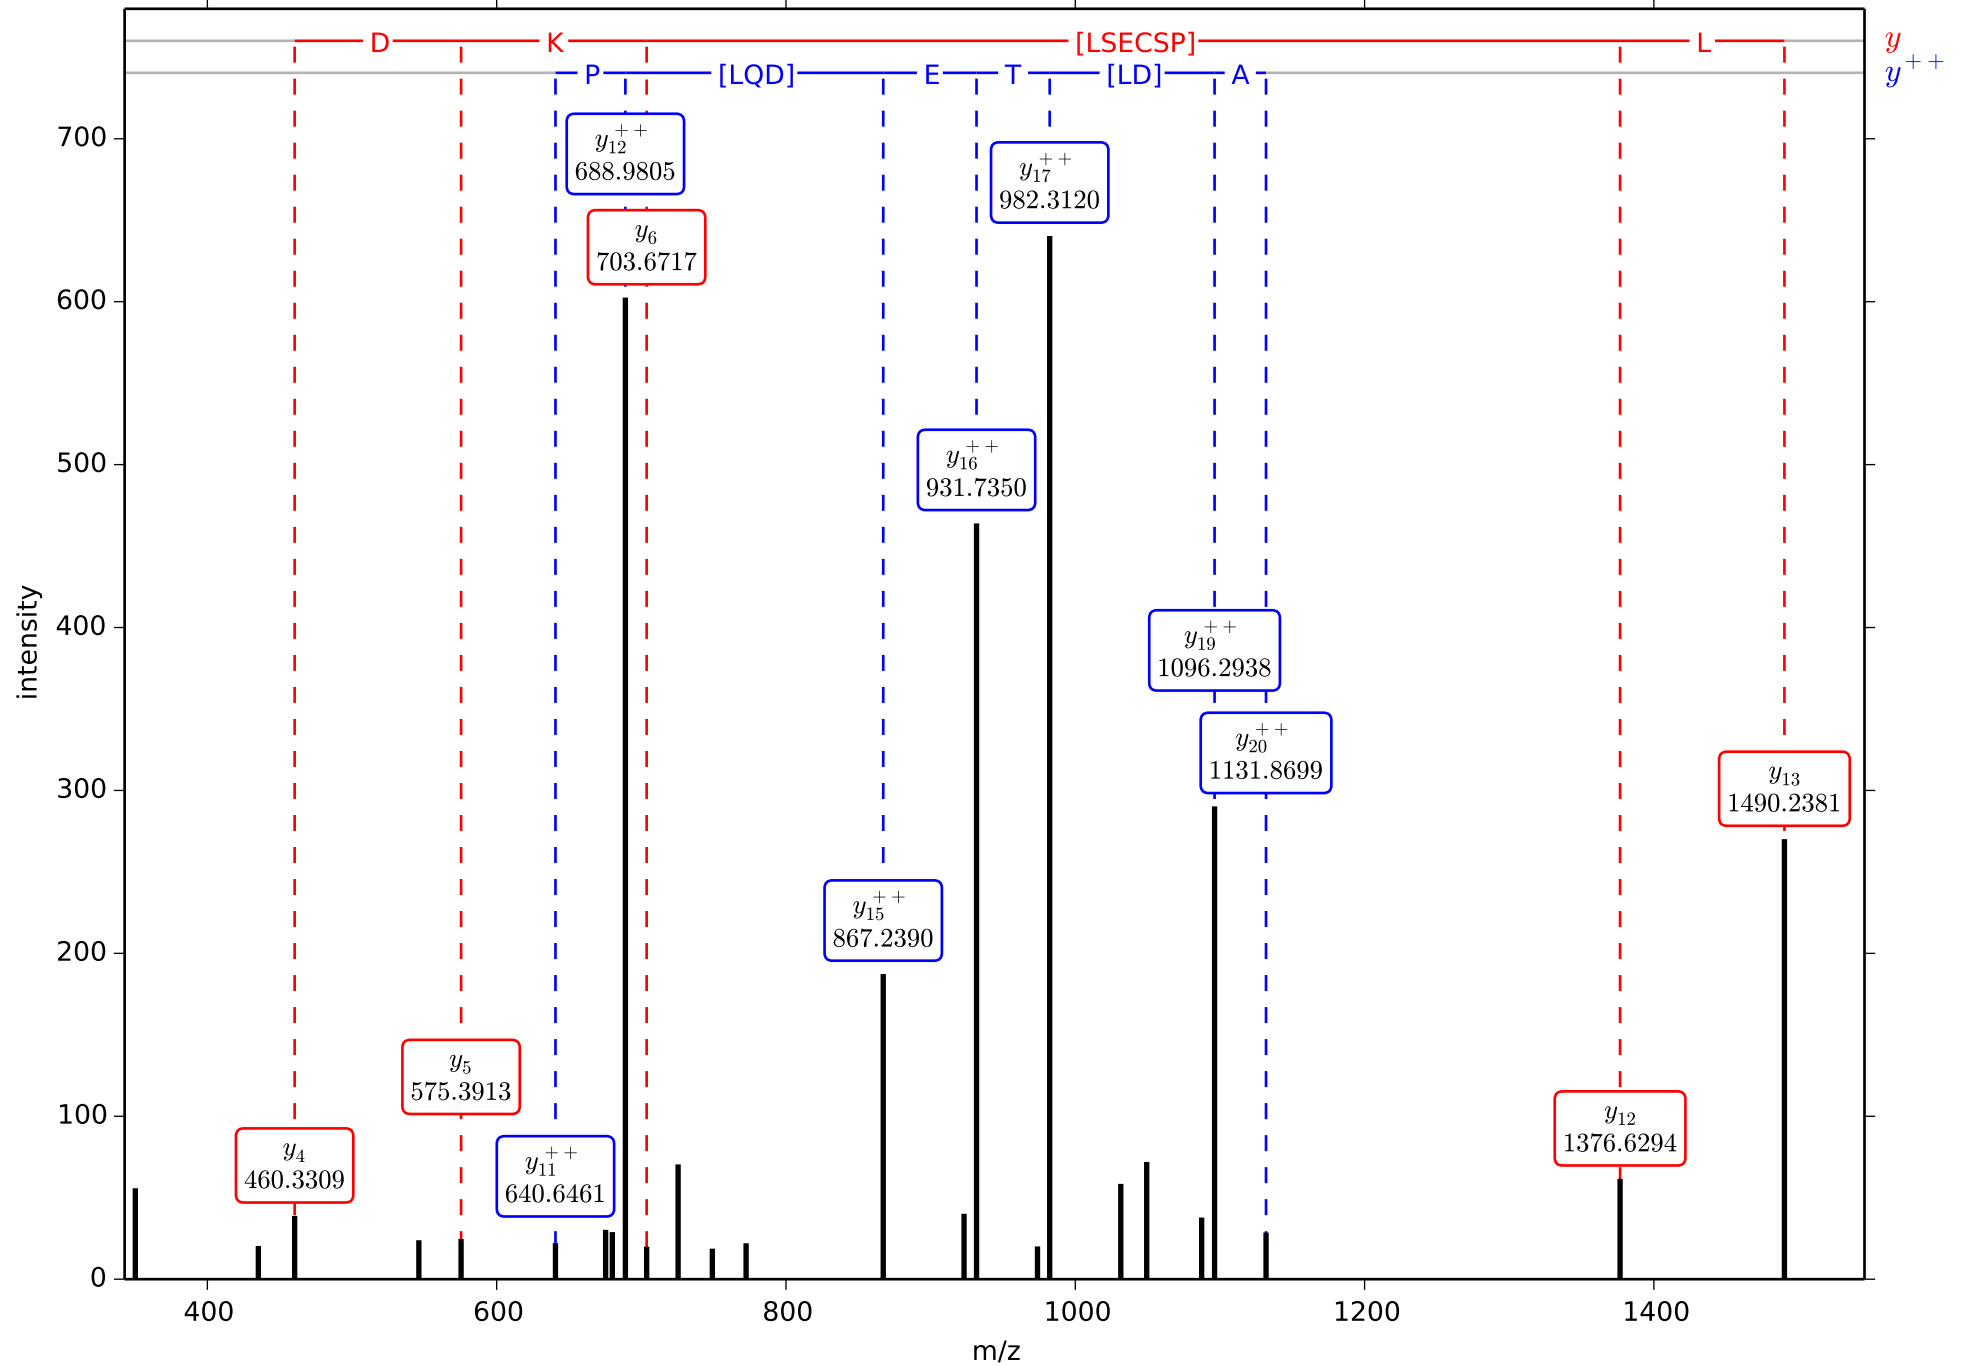

Q91X97 : LLQCDPSSAGQF

parent: 661.803260,2+

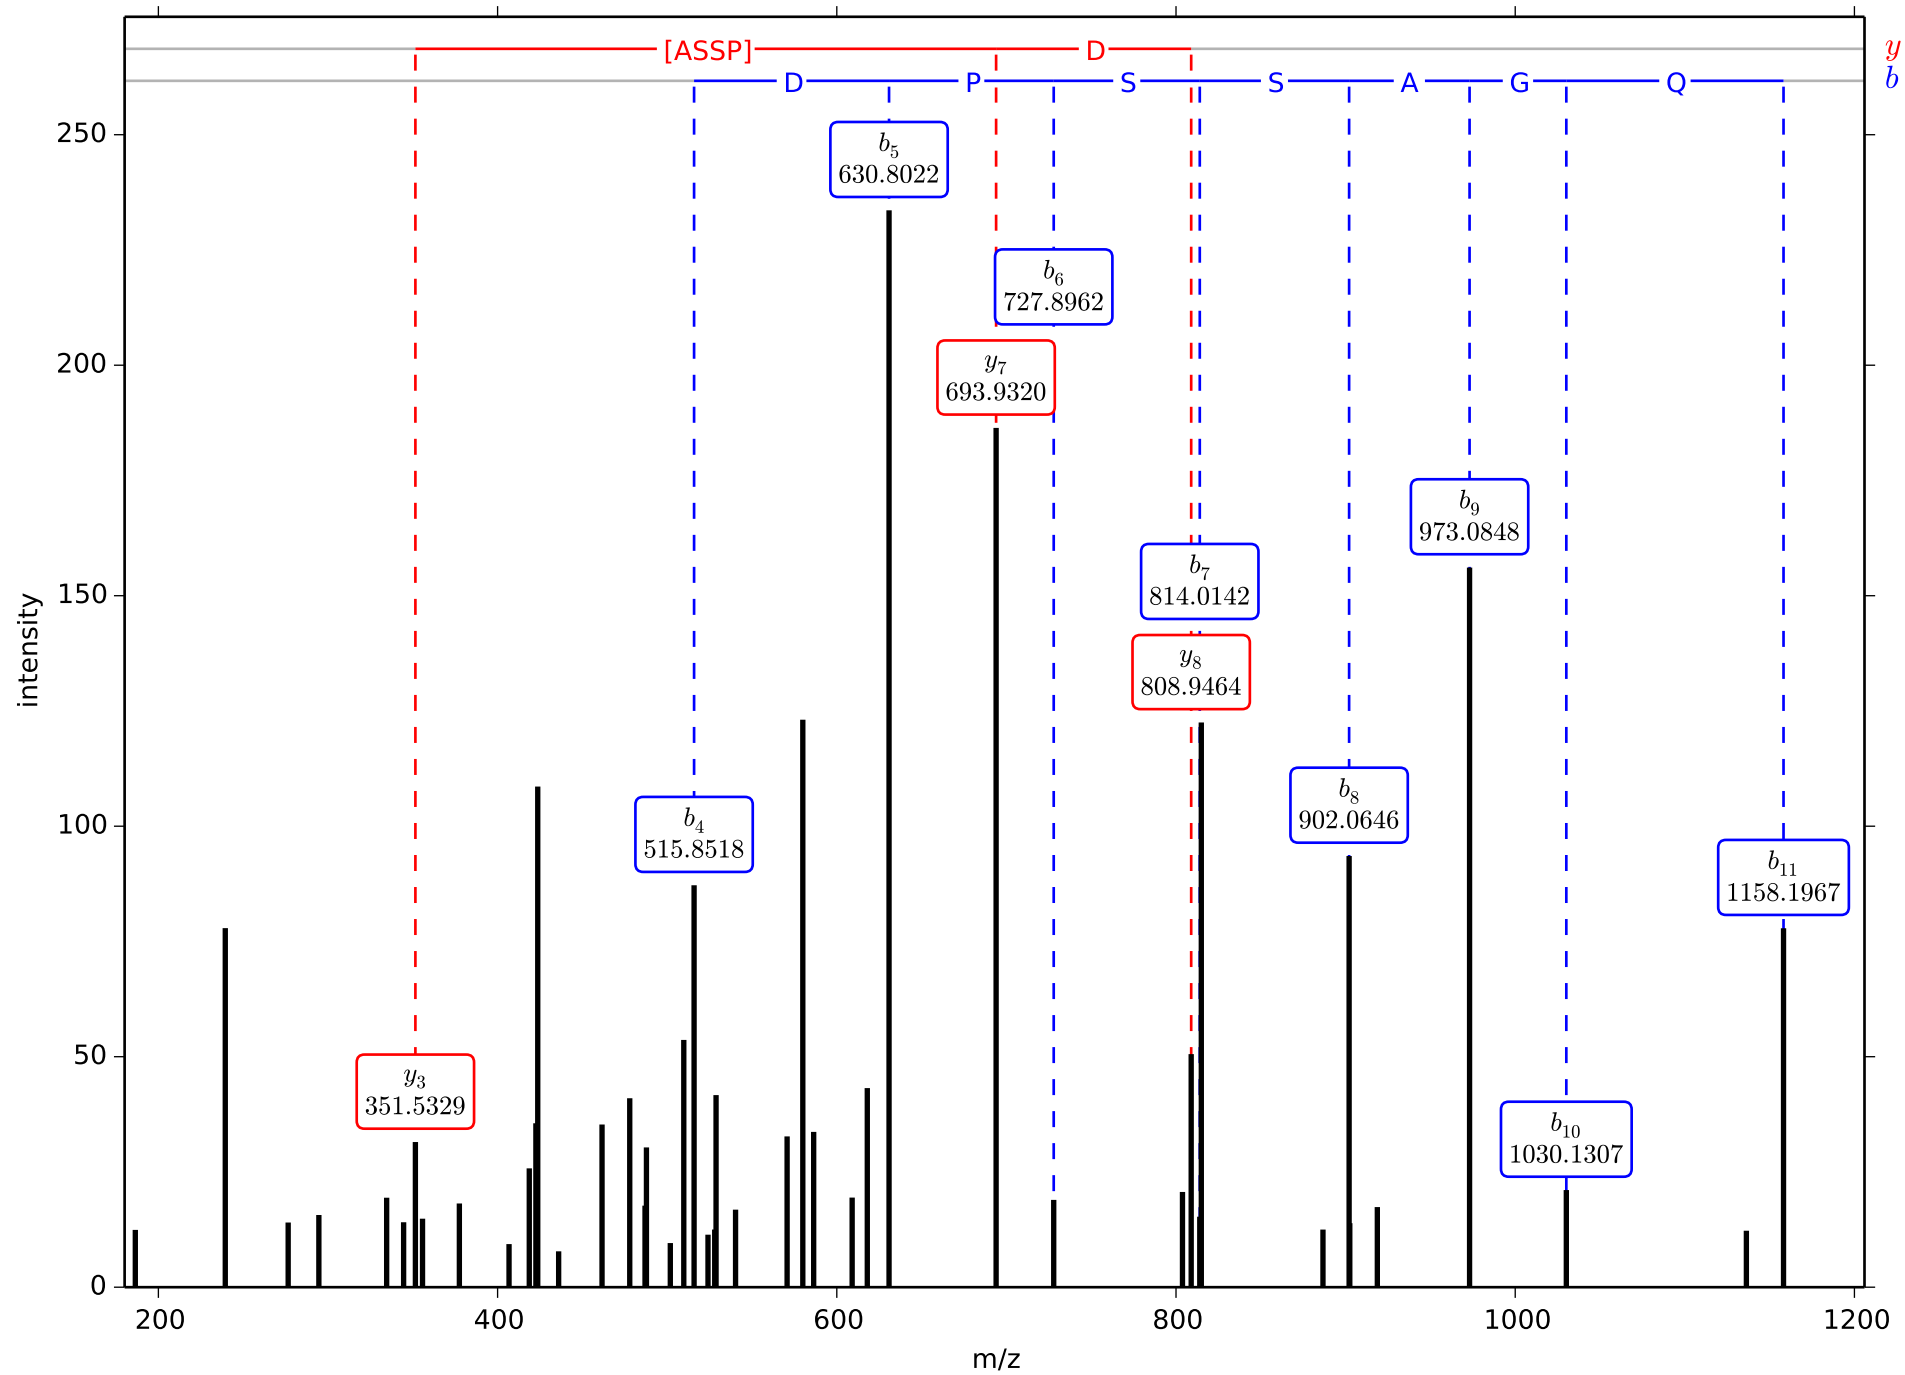

Q01768 : GDFCIQVGR

parent: 526.250880,2+

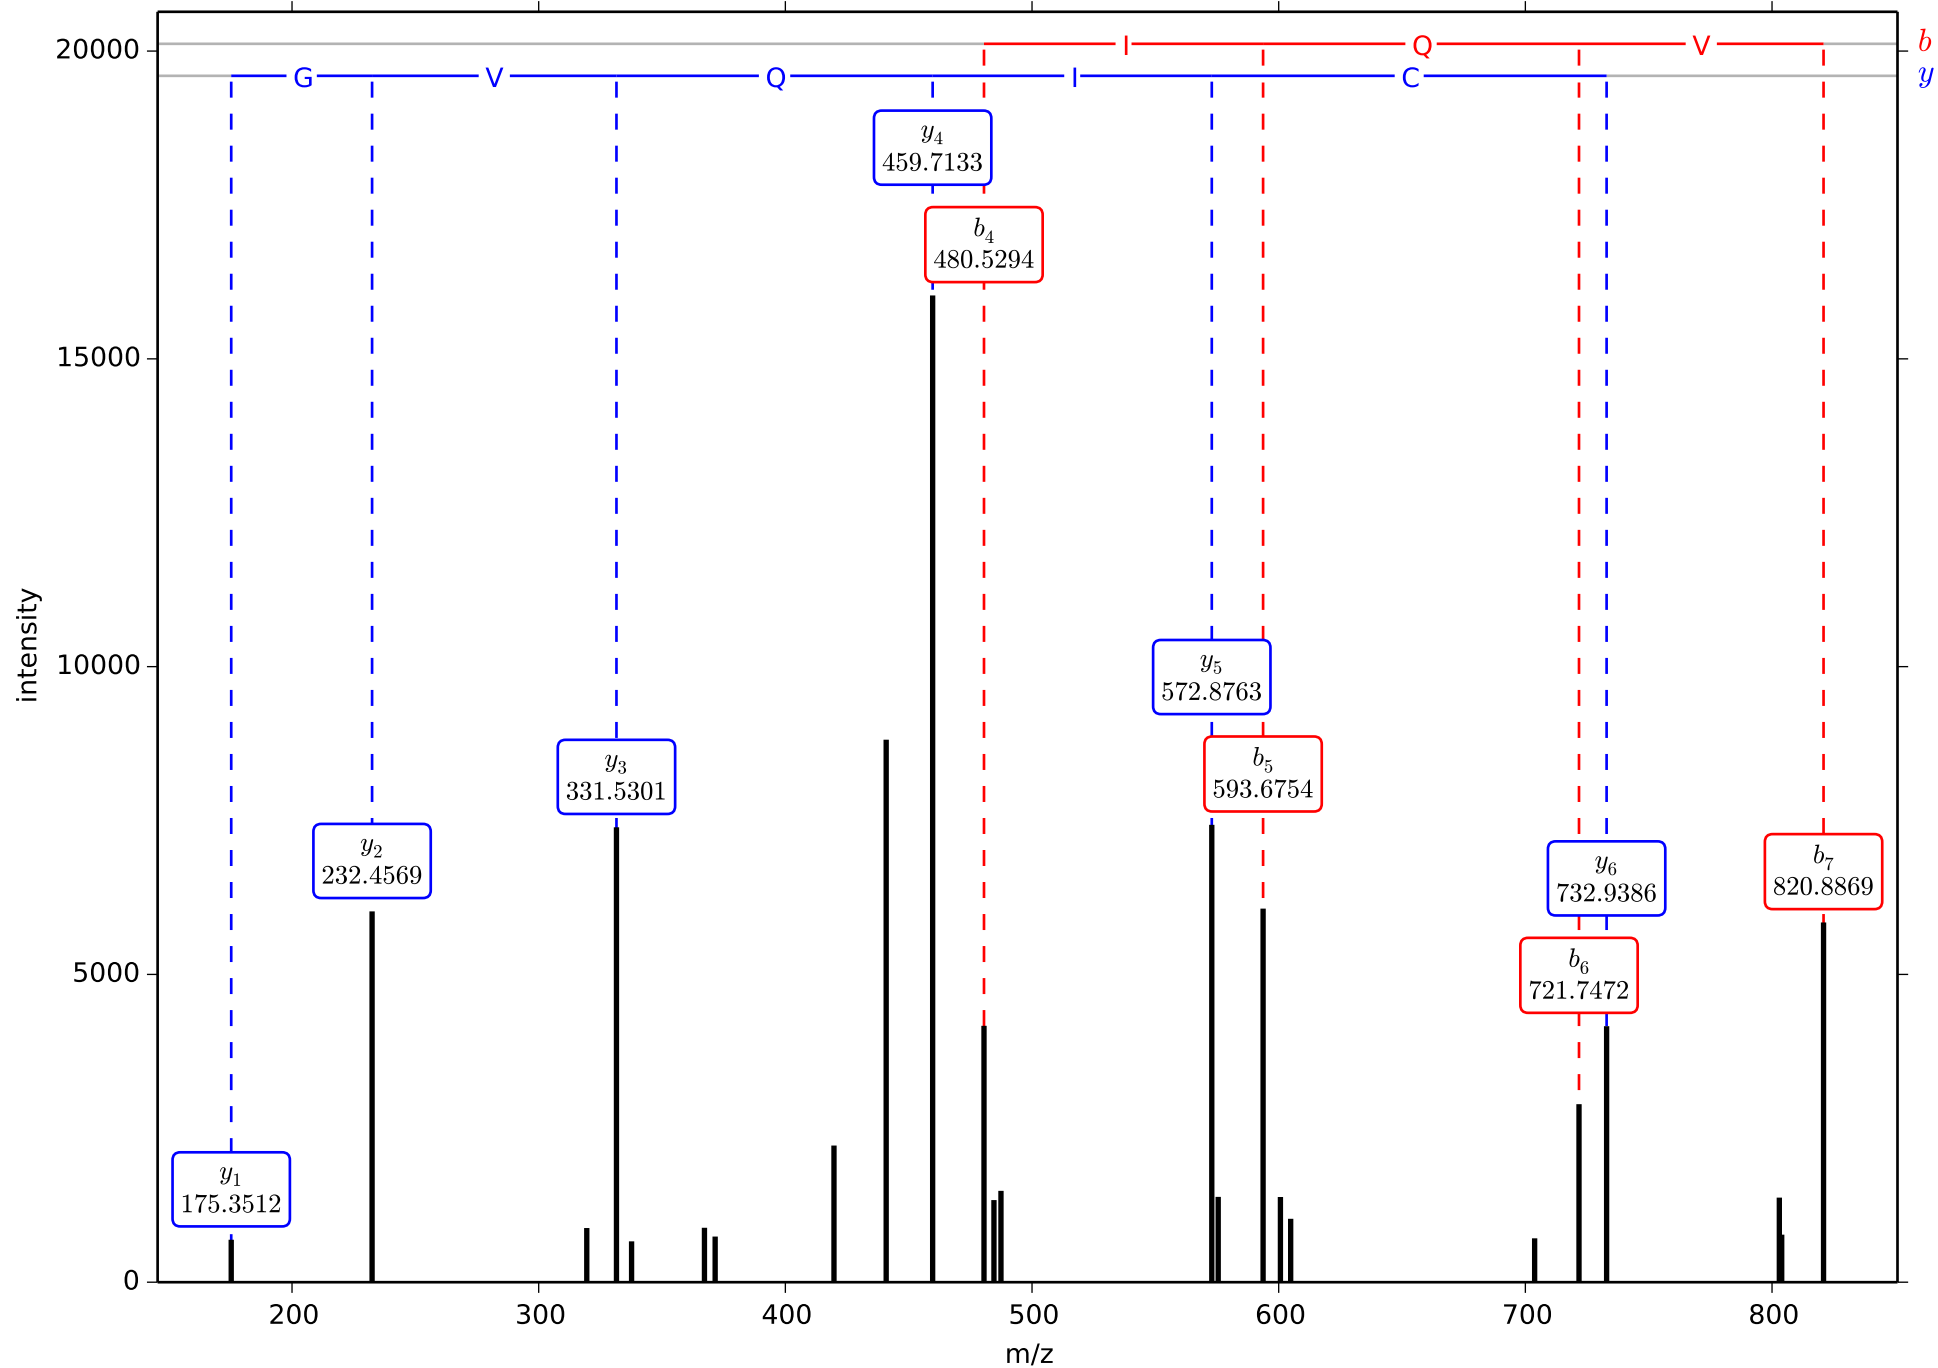

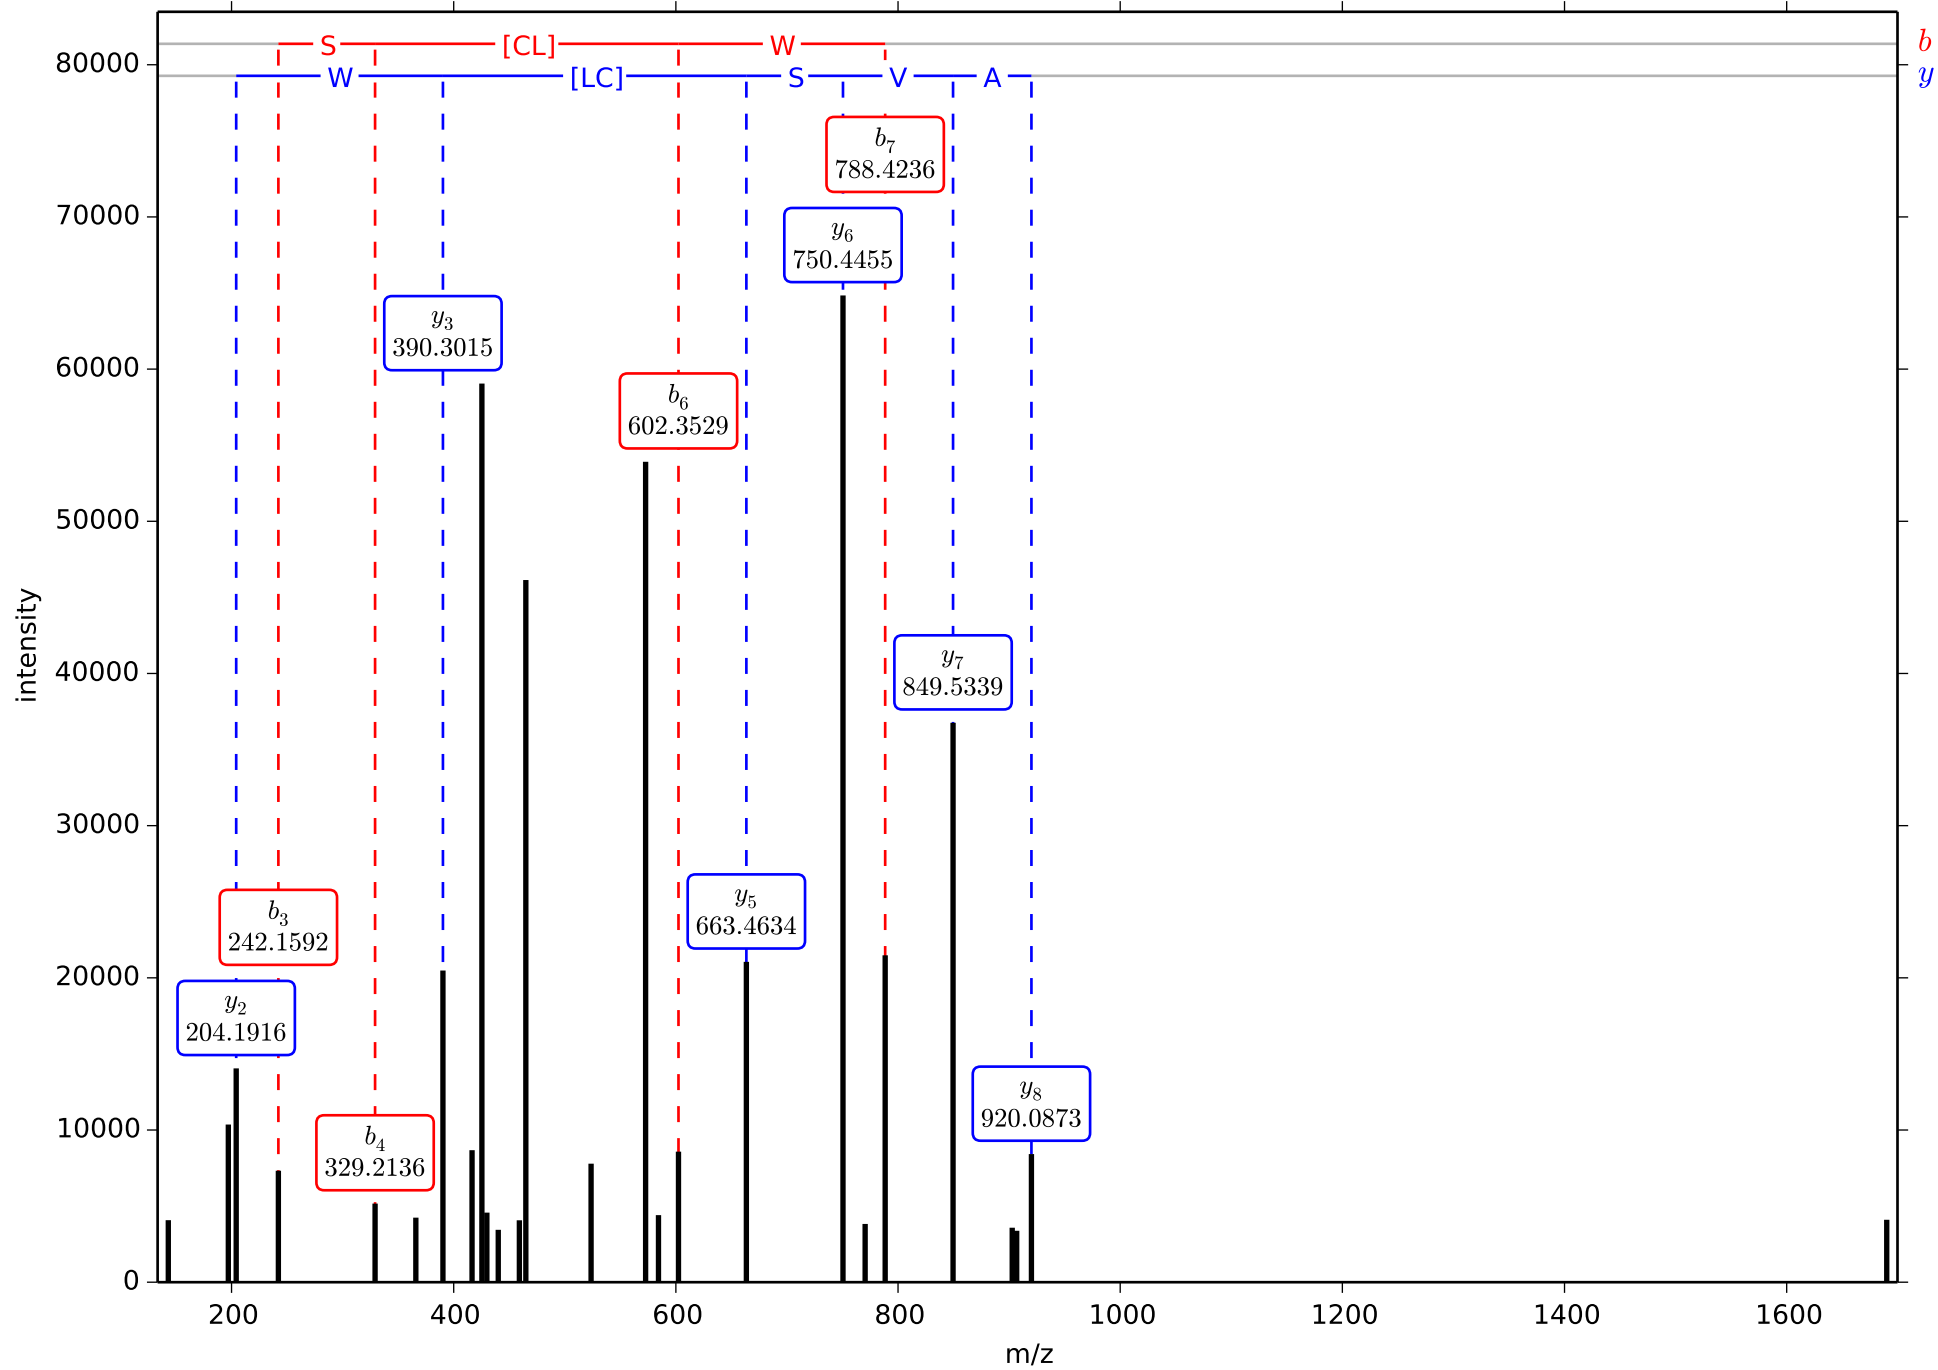

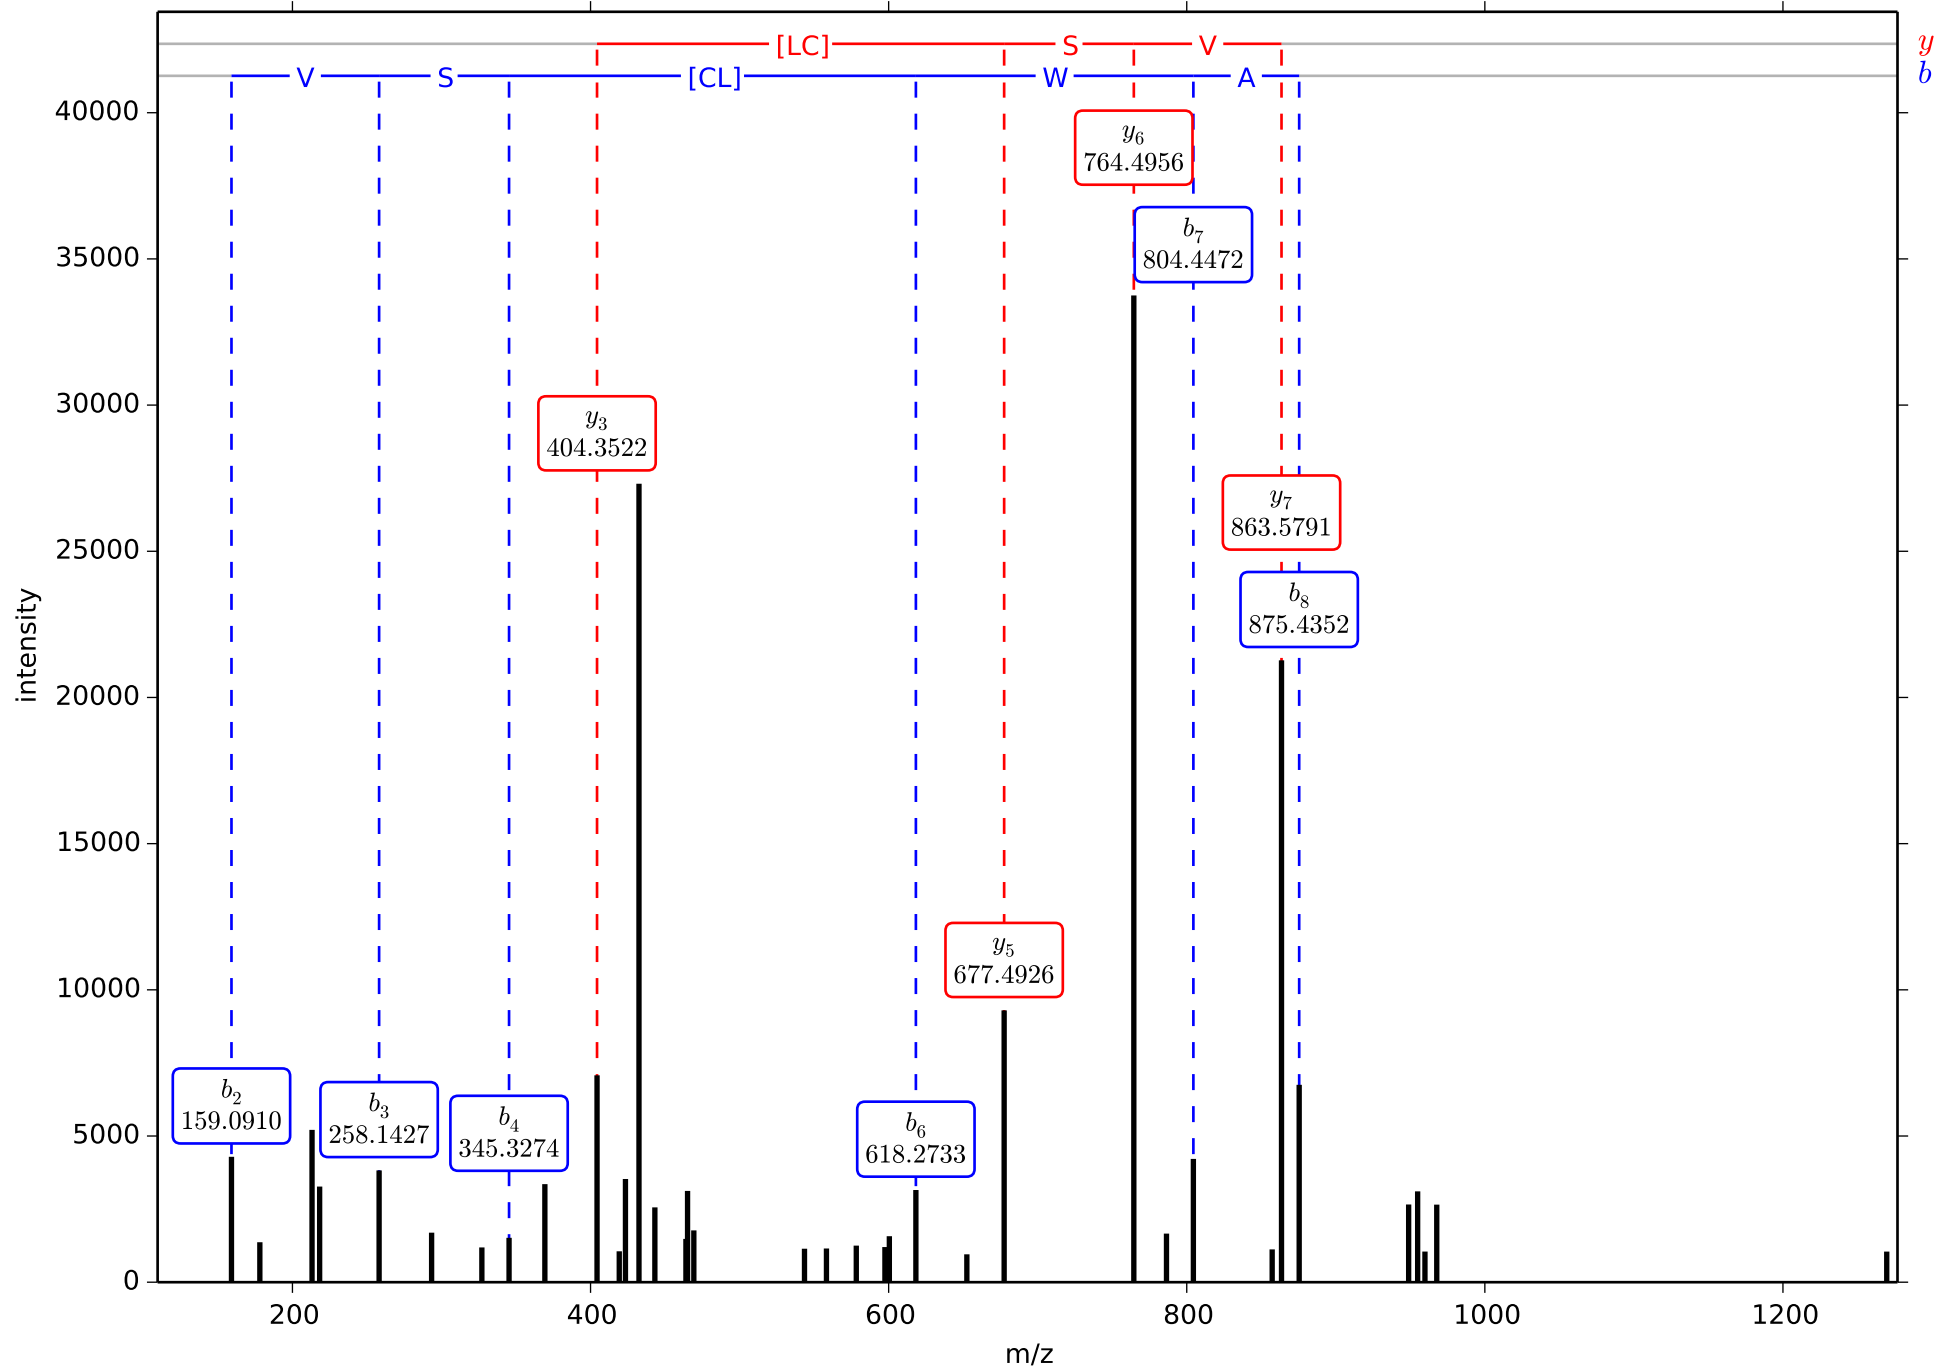

P14206 : YVDIAIPCNNK

parent: 653.823950,2+

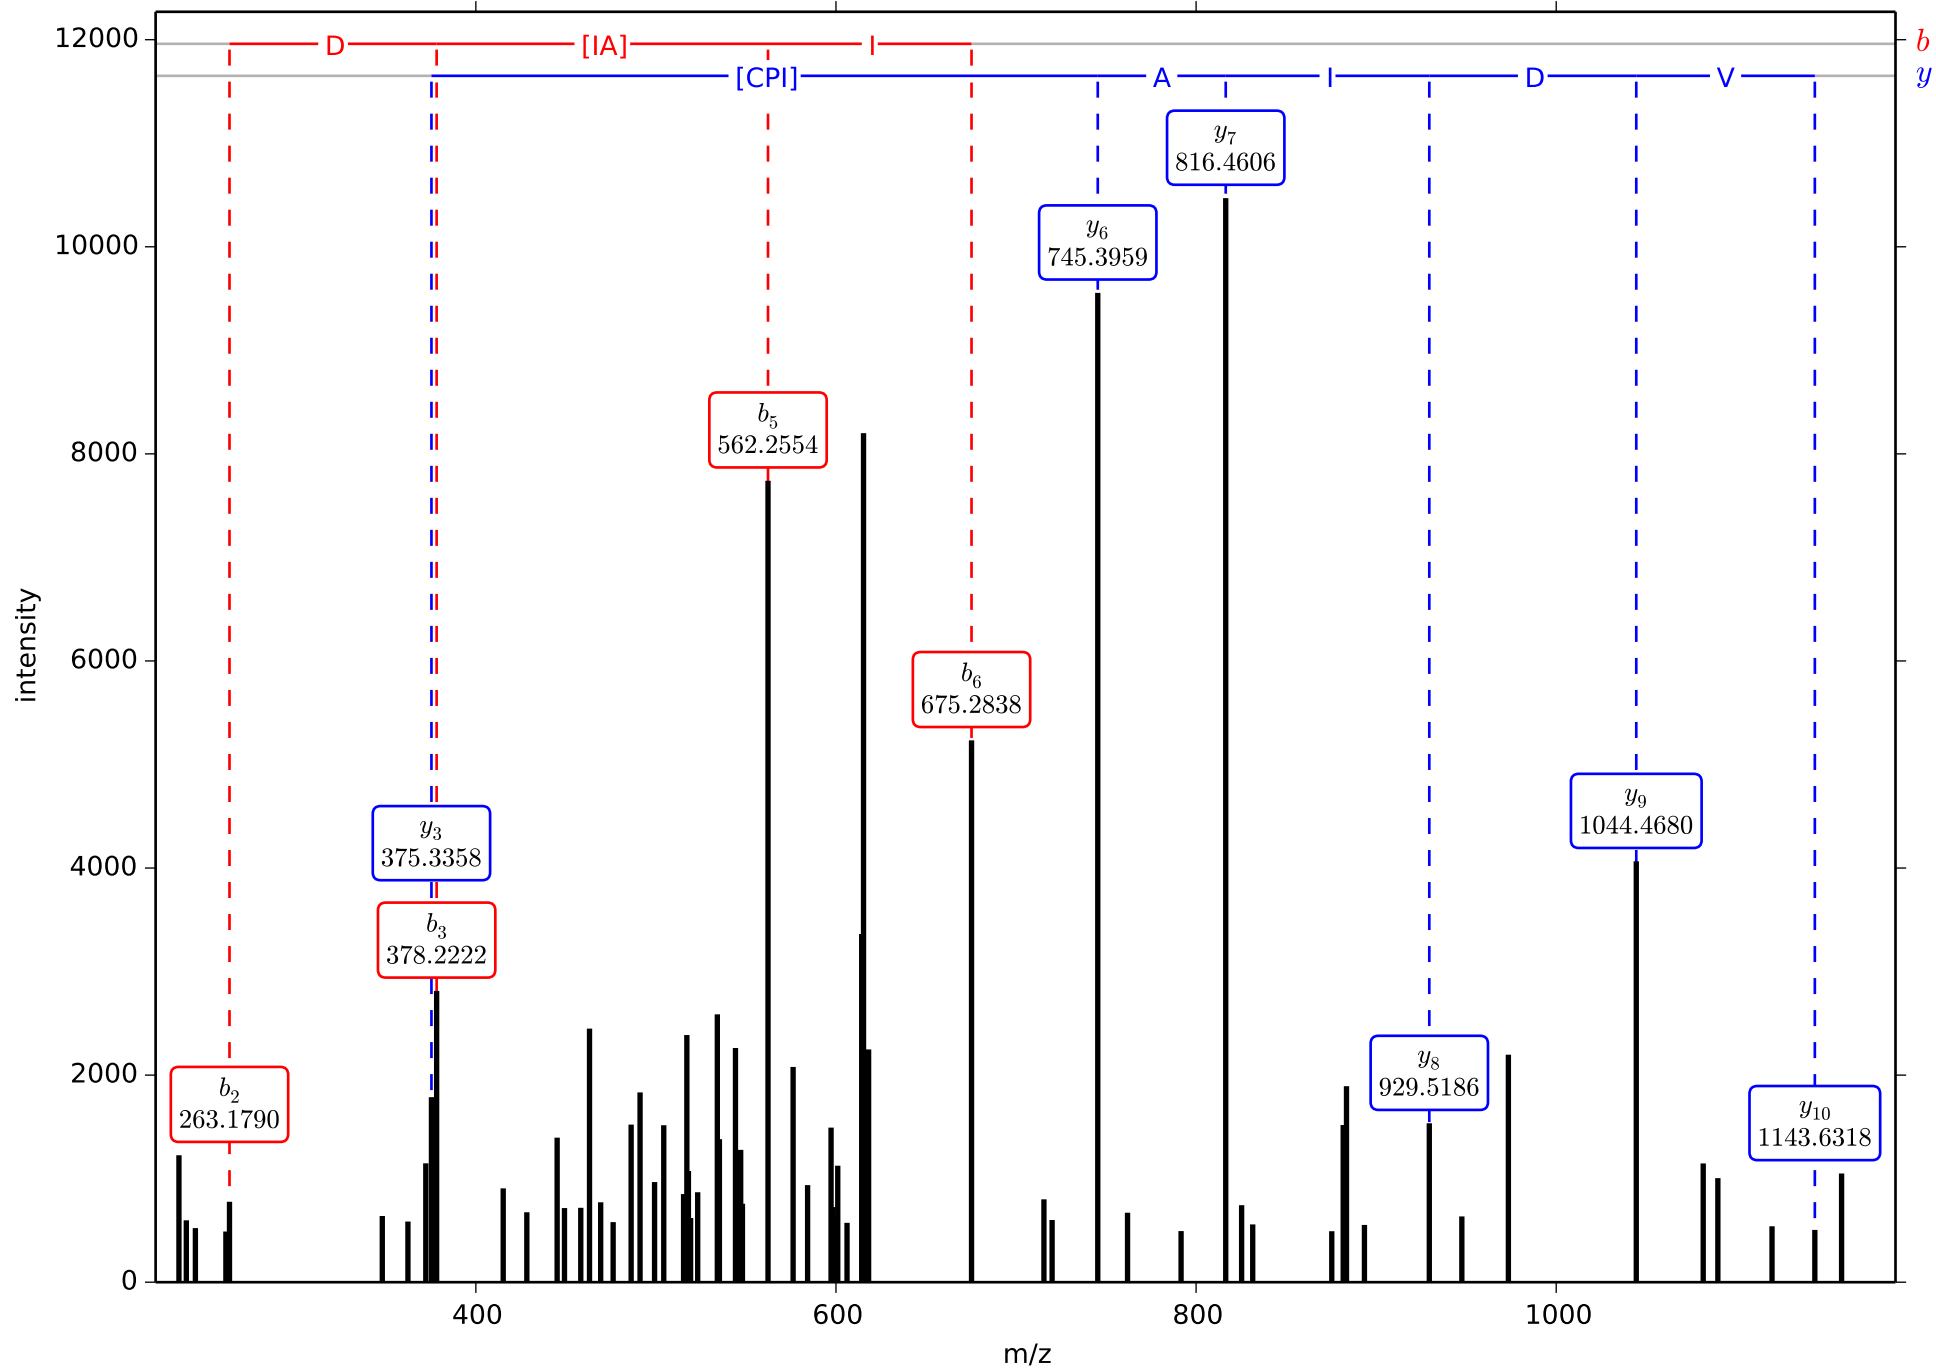

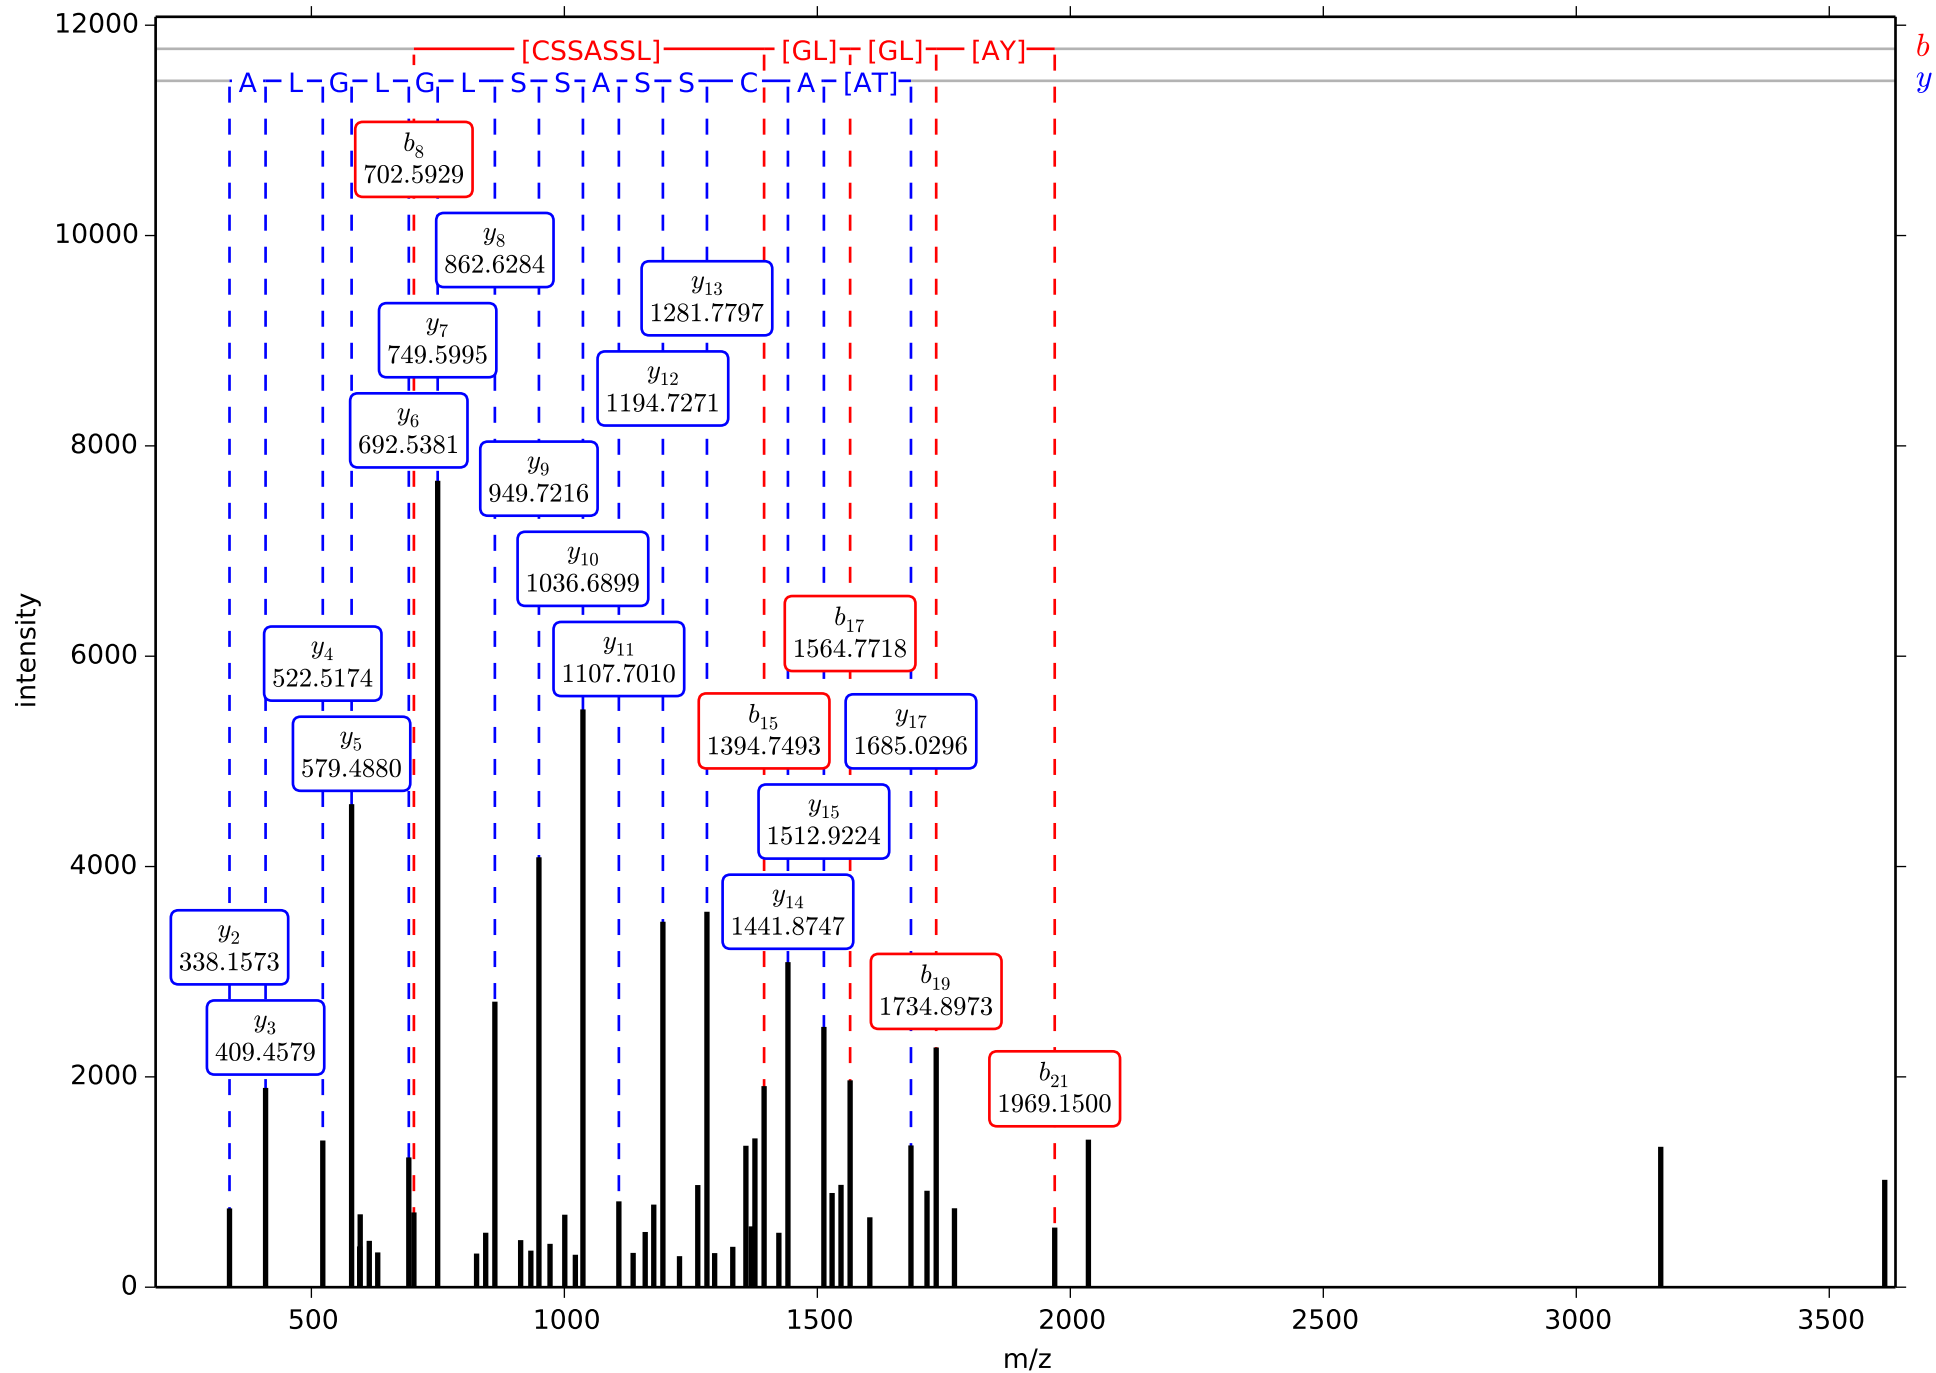

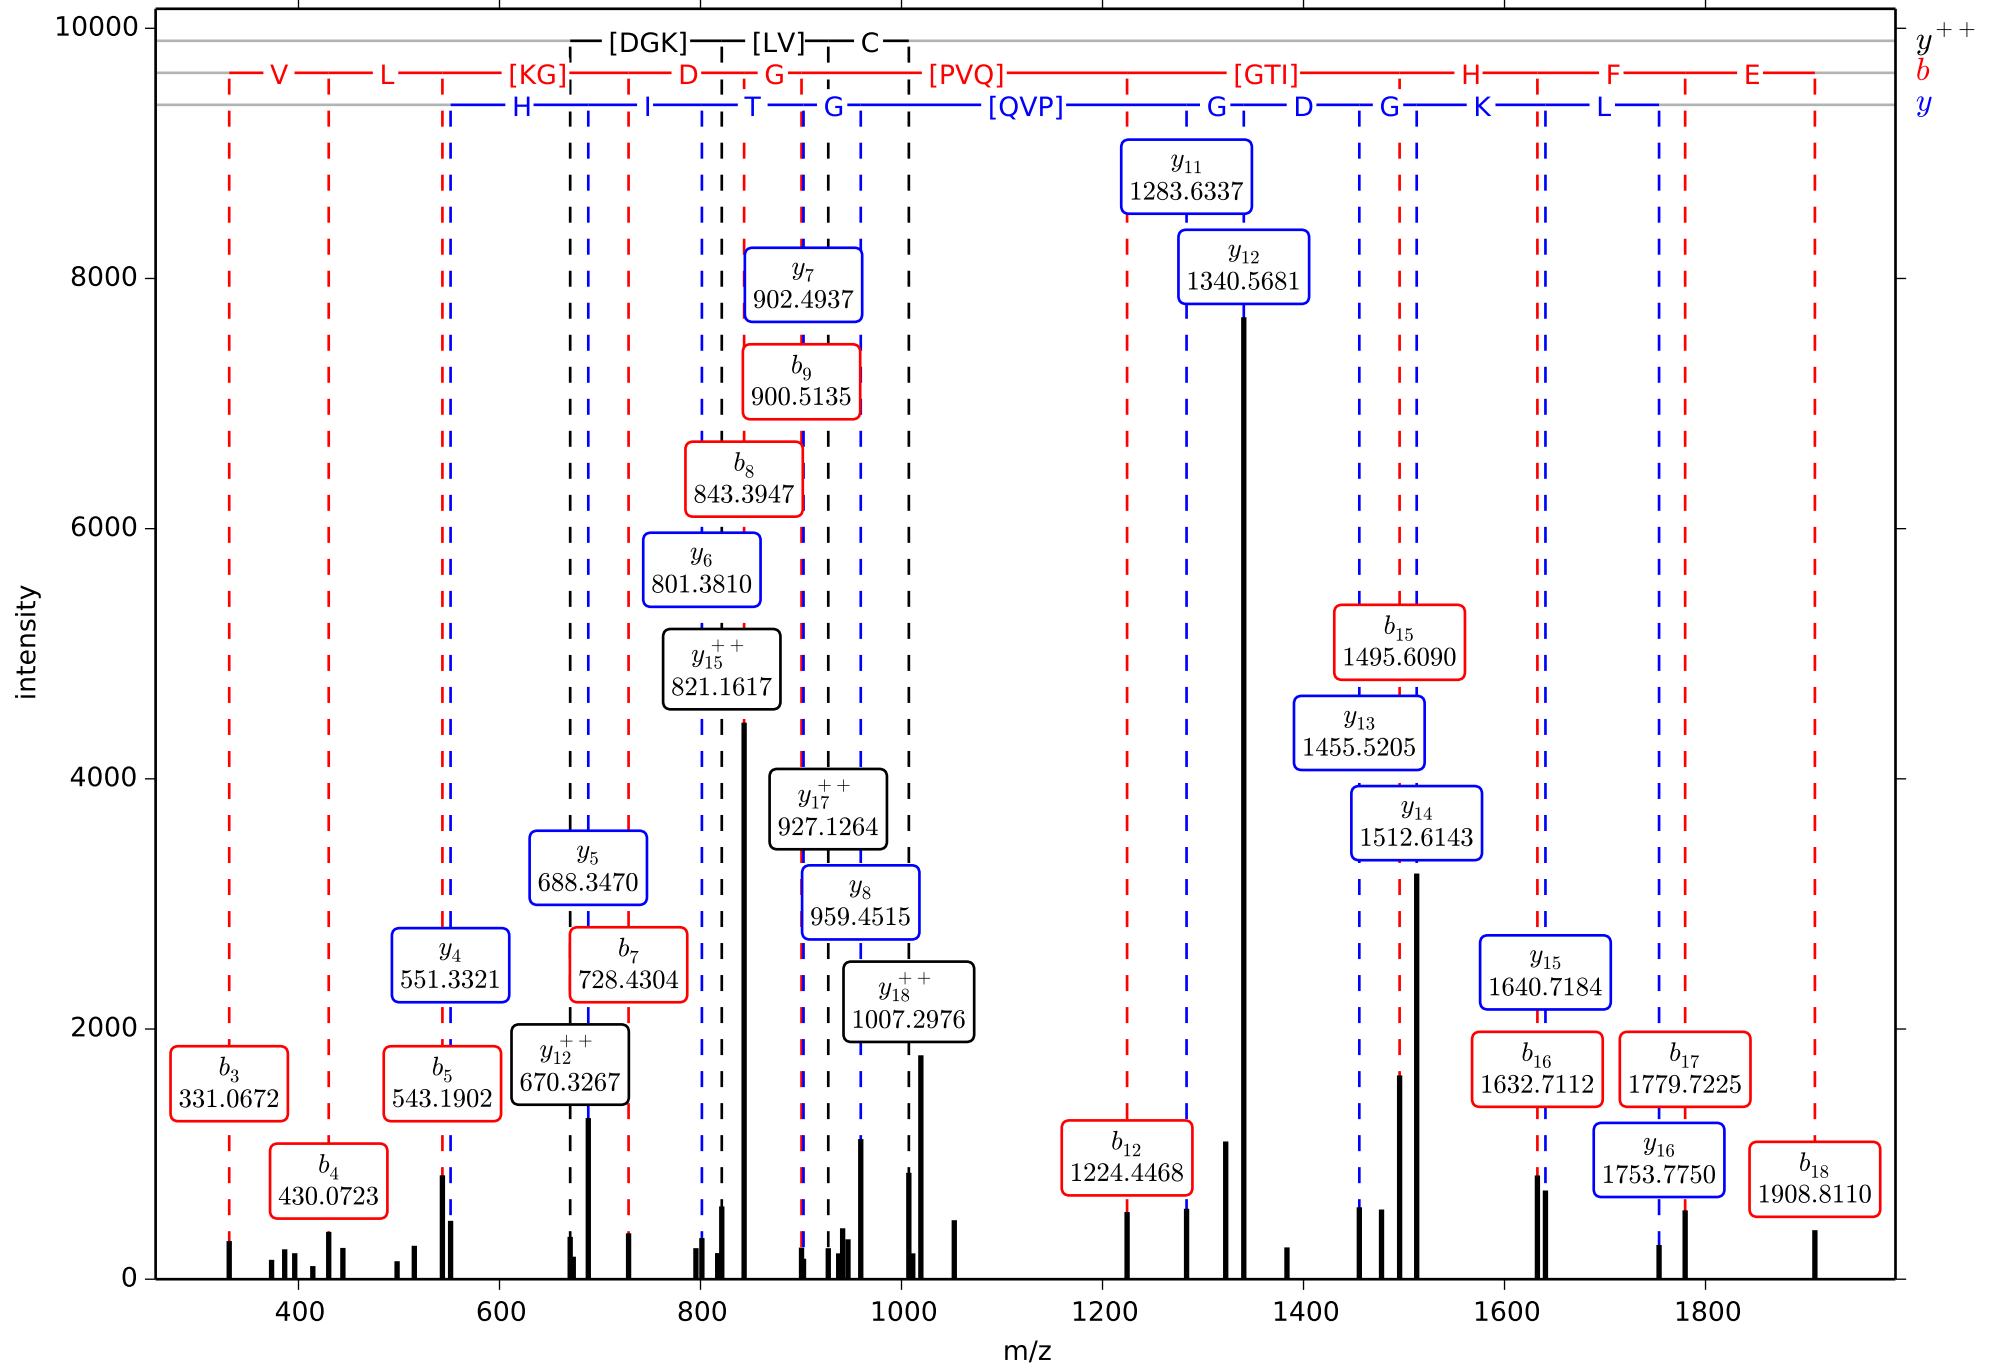



P17742 : KITISDCGQL

parent: 567.799810,2+

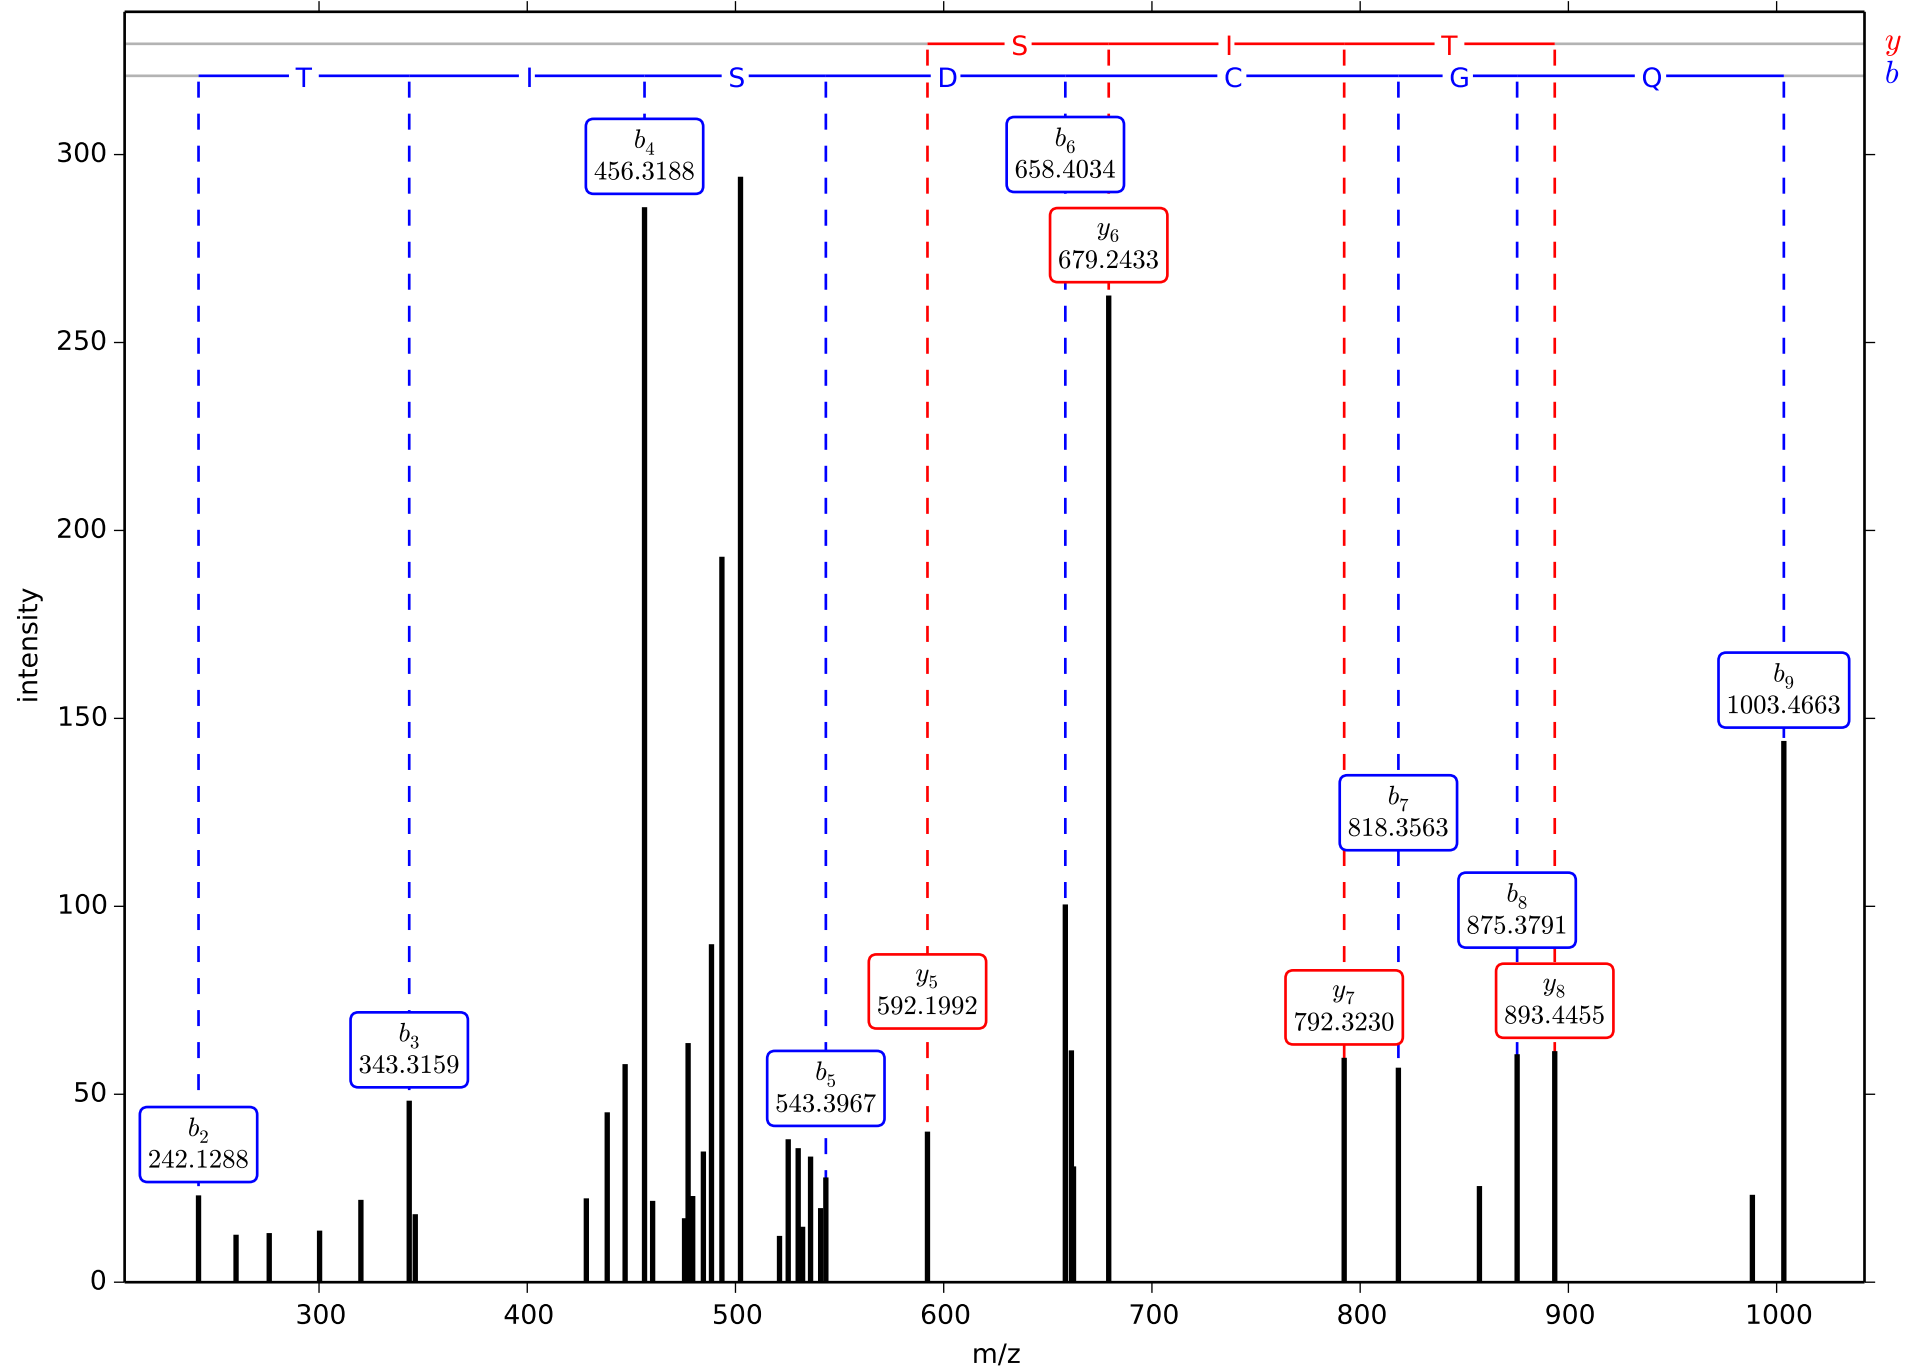

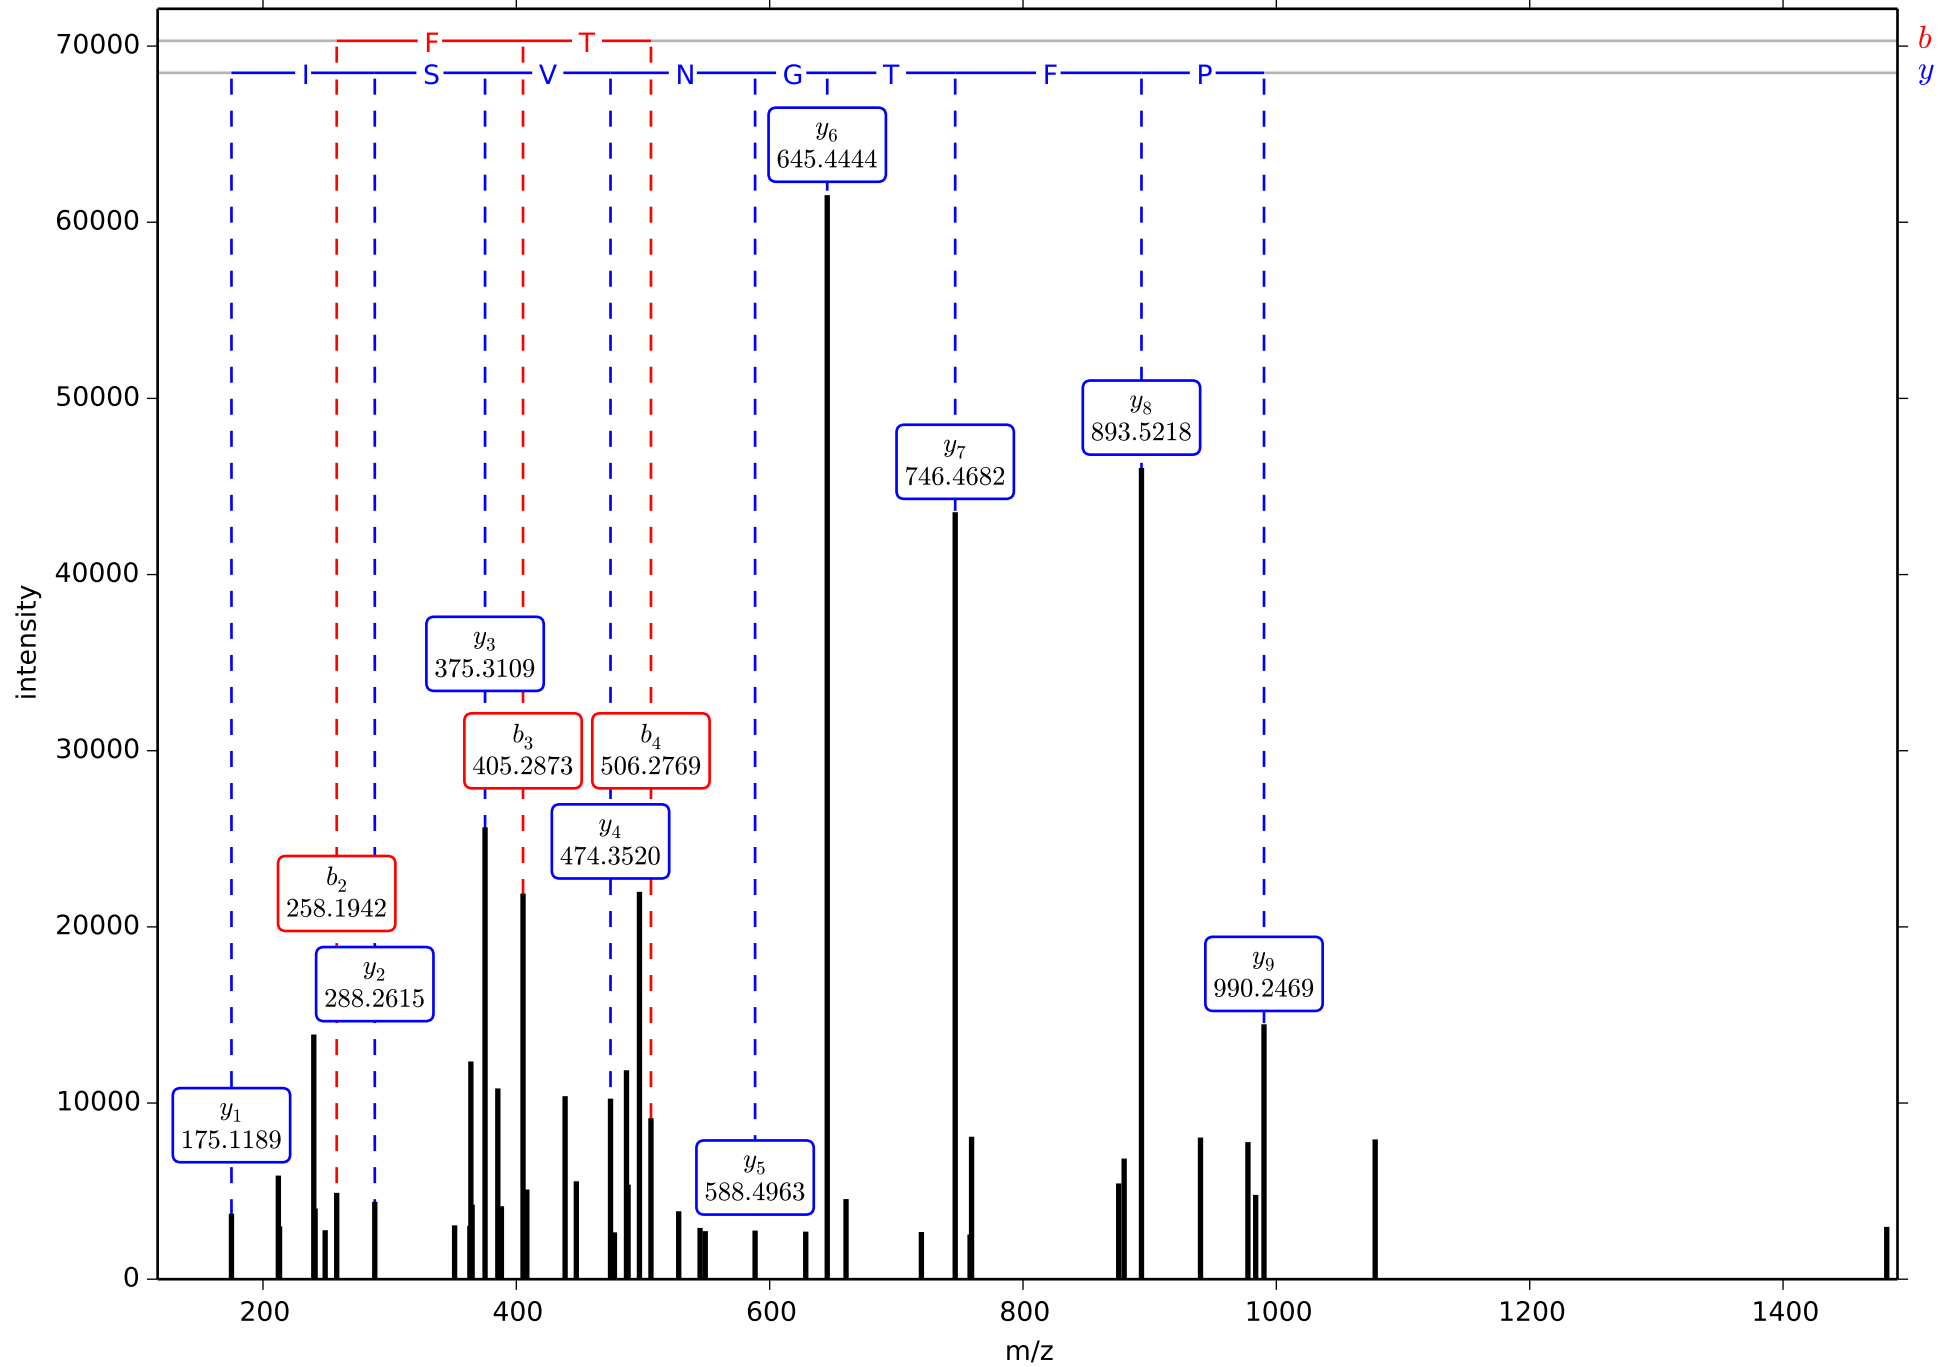

P63017 : GPAVGIDLGTTYSCVGVFQHGK

parent: 755.053080,3+

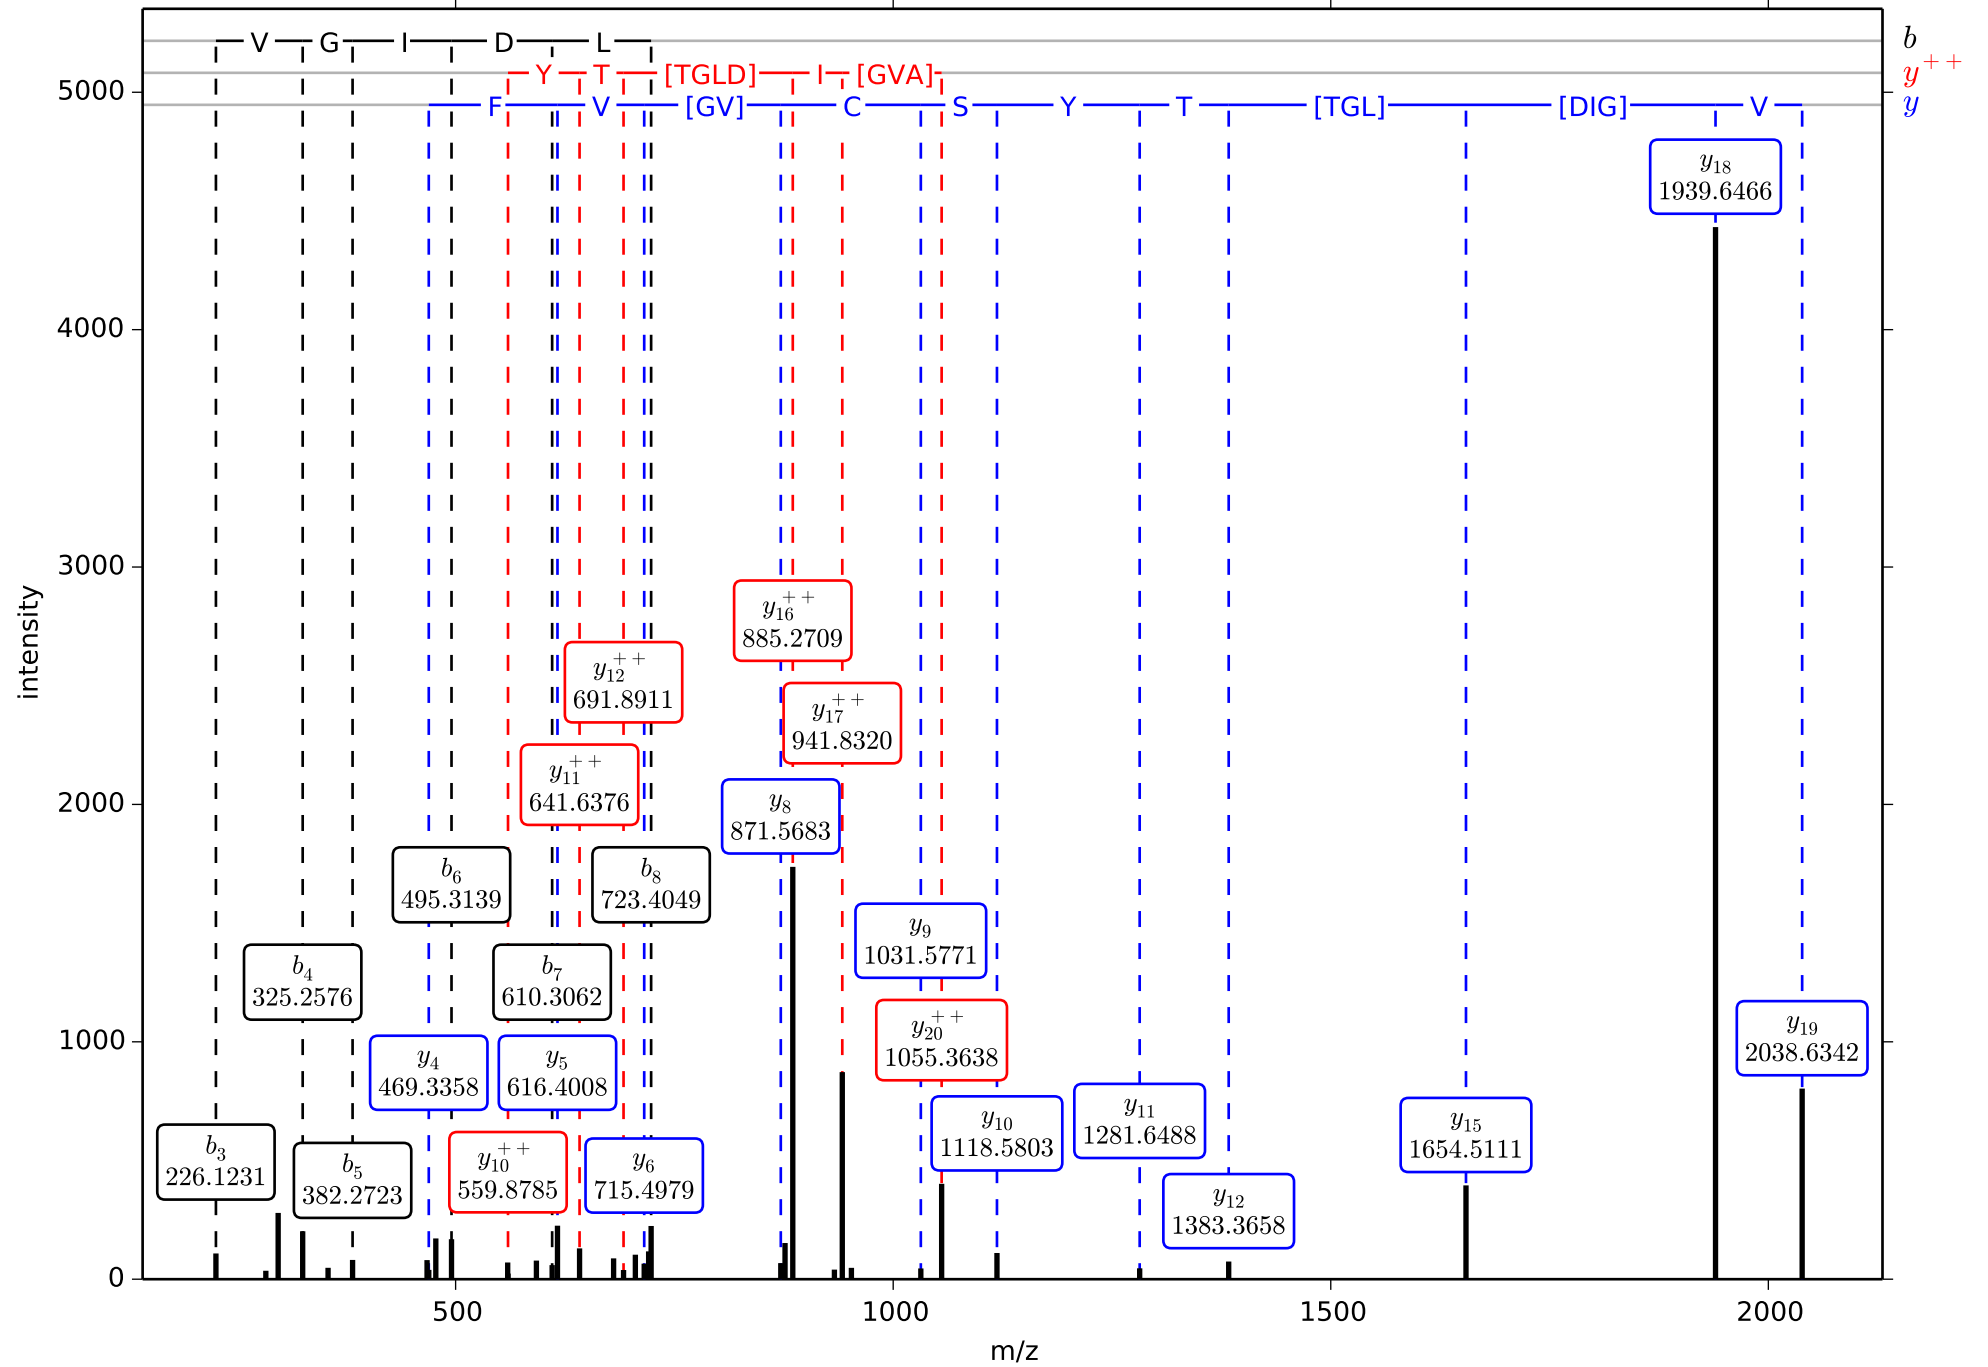

P61079 : IYHPNINSNGSICLDILR

parent: 1050.054700,2+

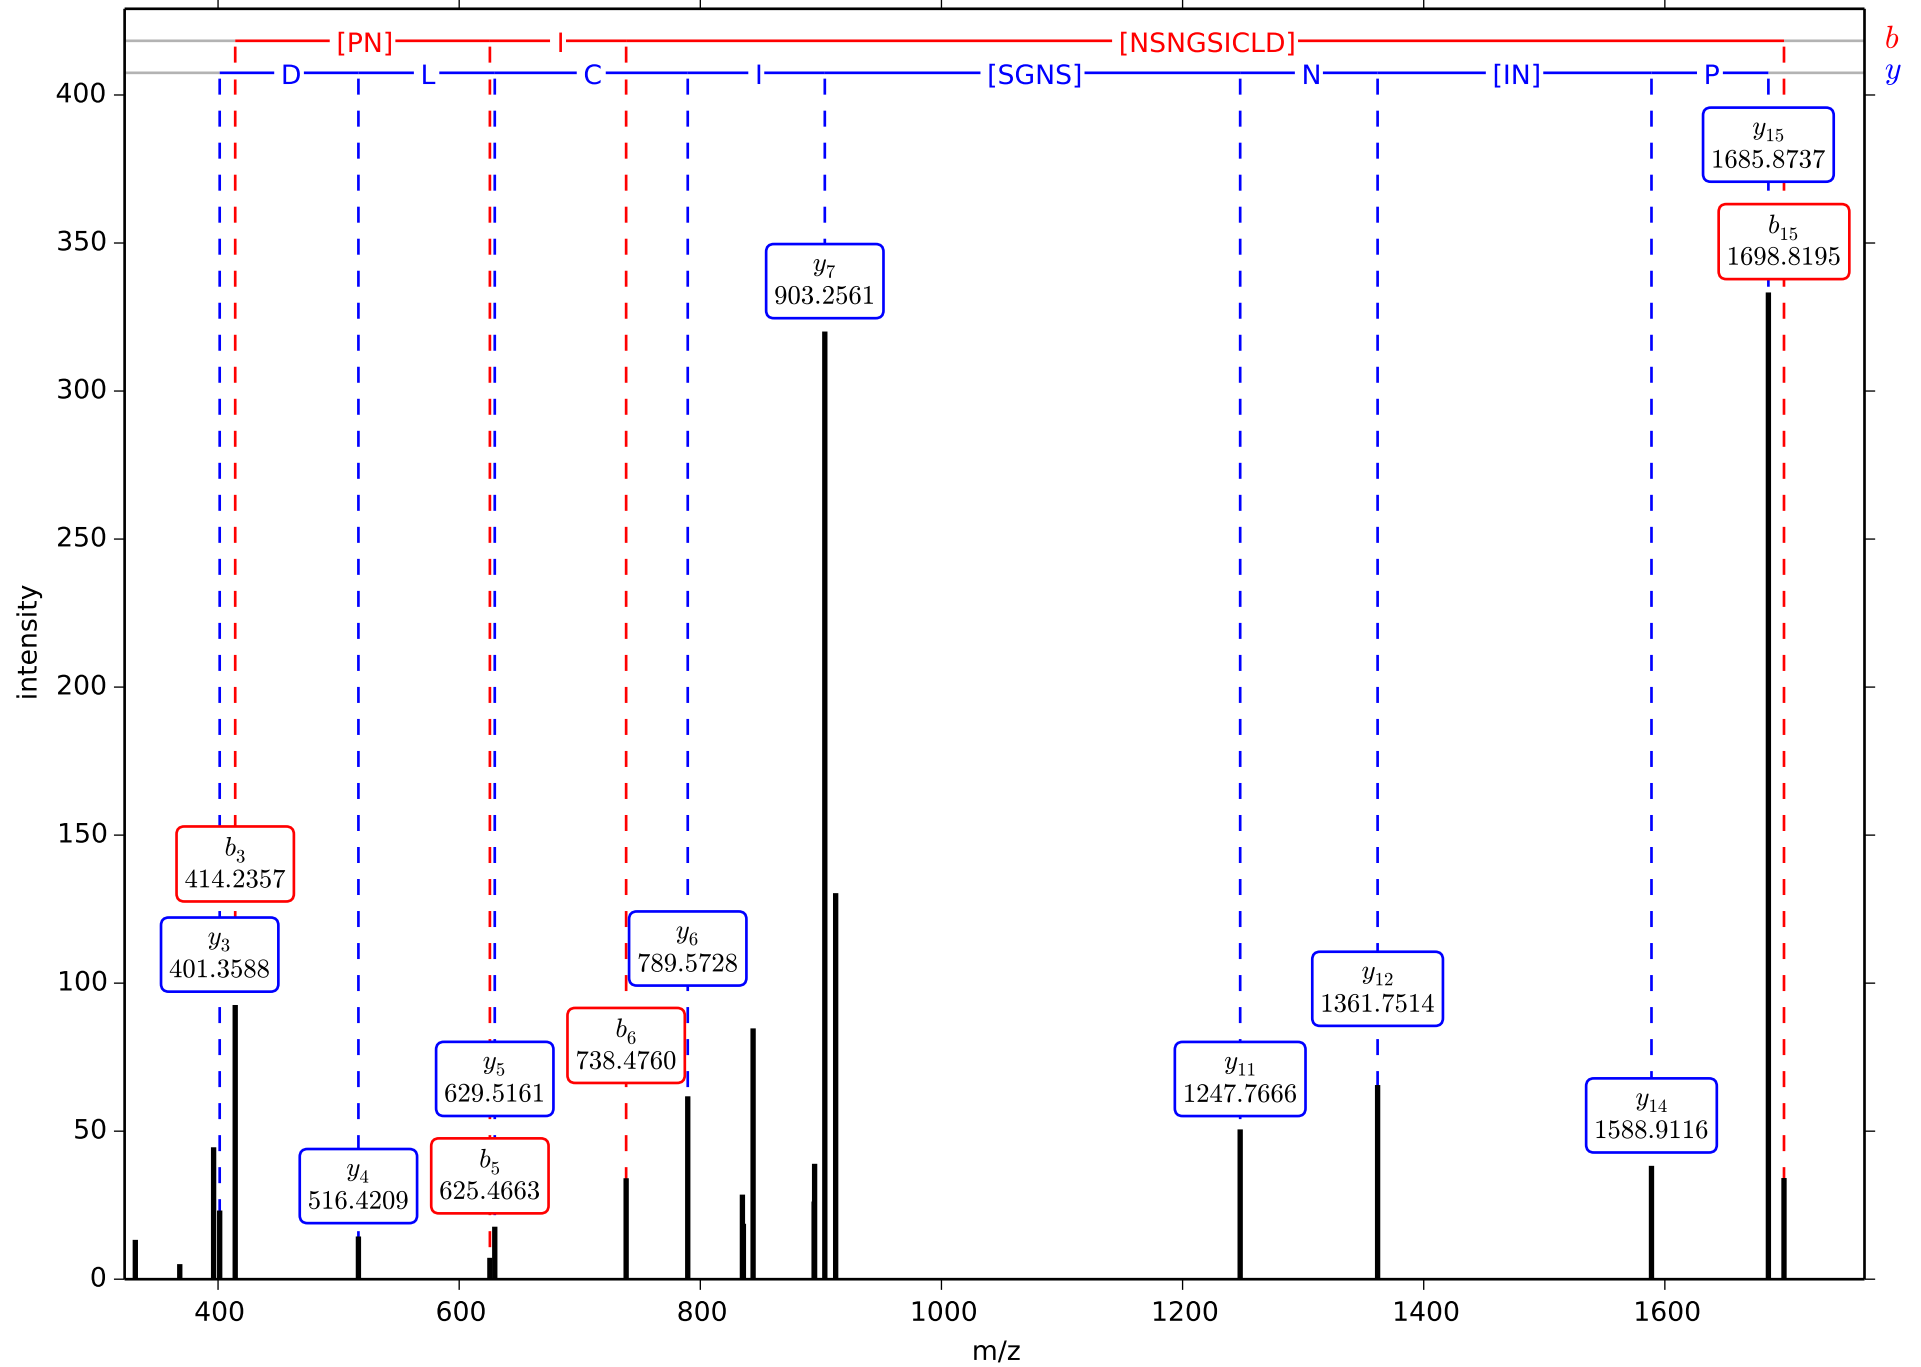

Q99LY9 : IEFDDFEECLLR

parent: 793.364370,2+

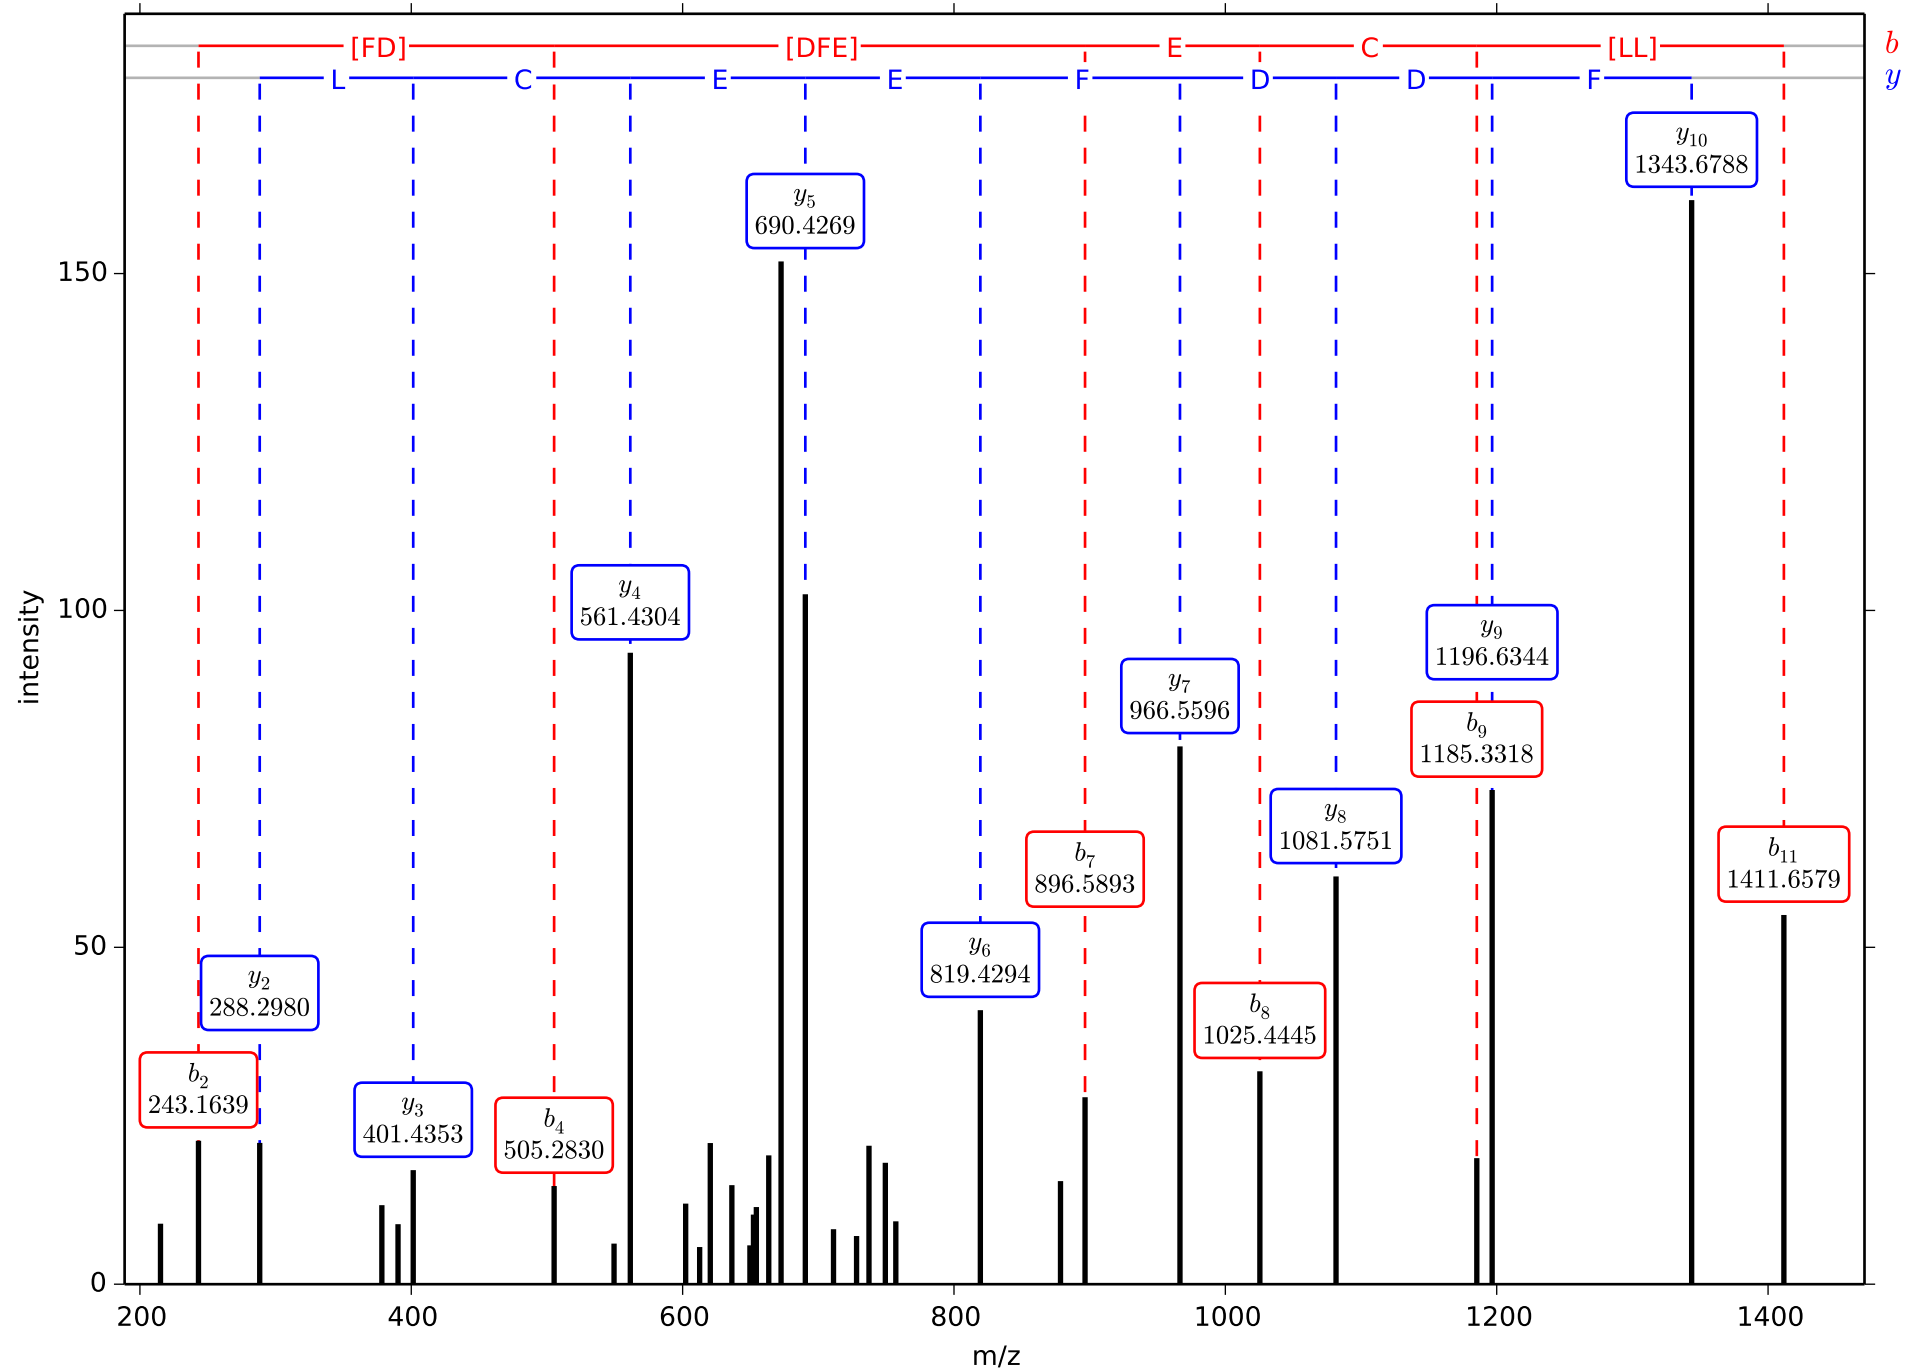

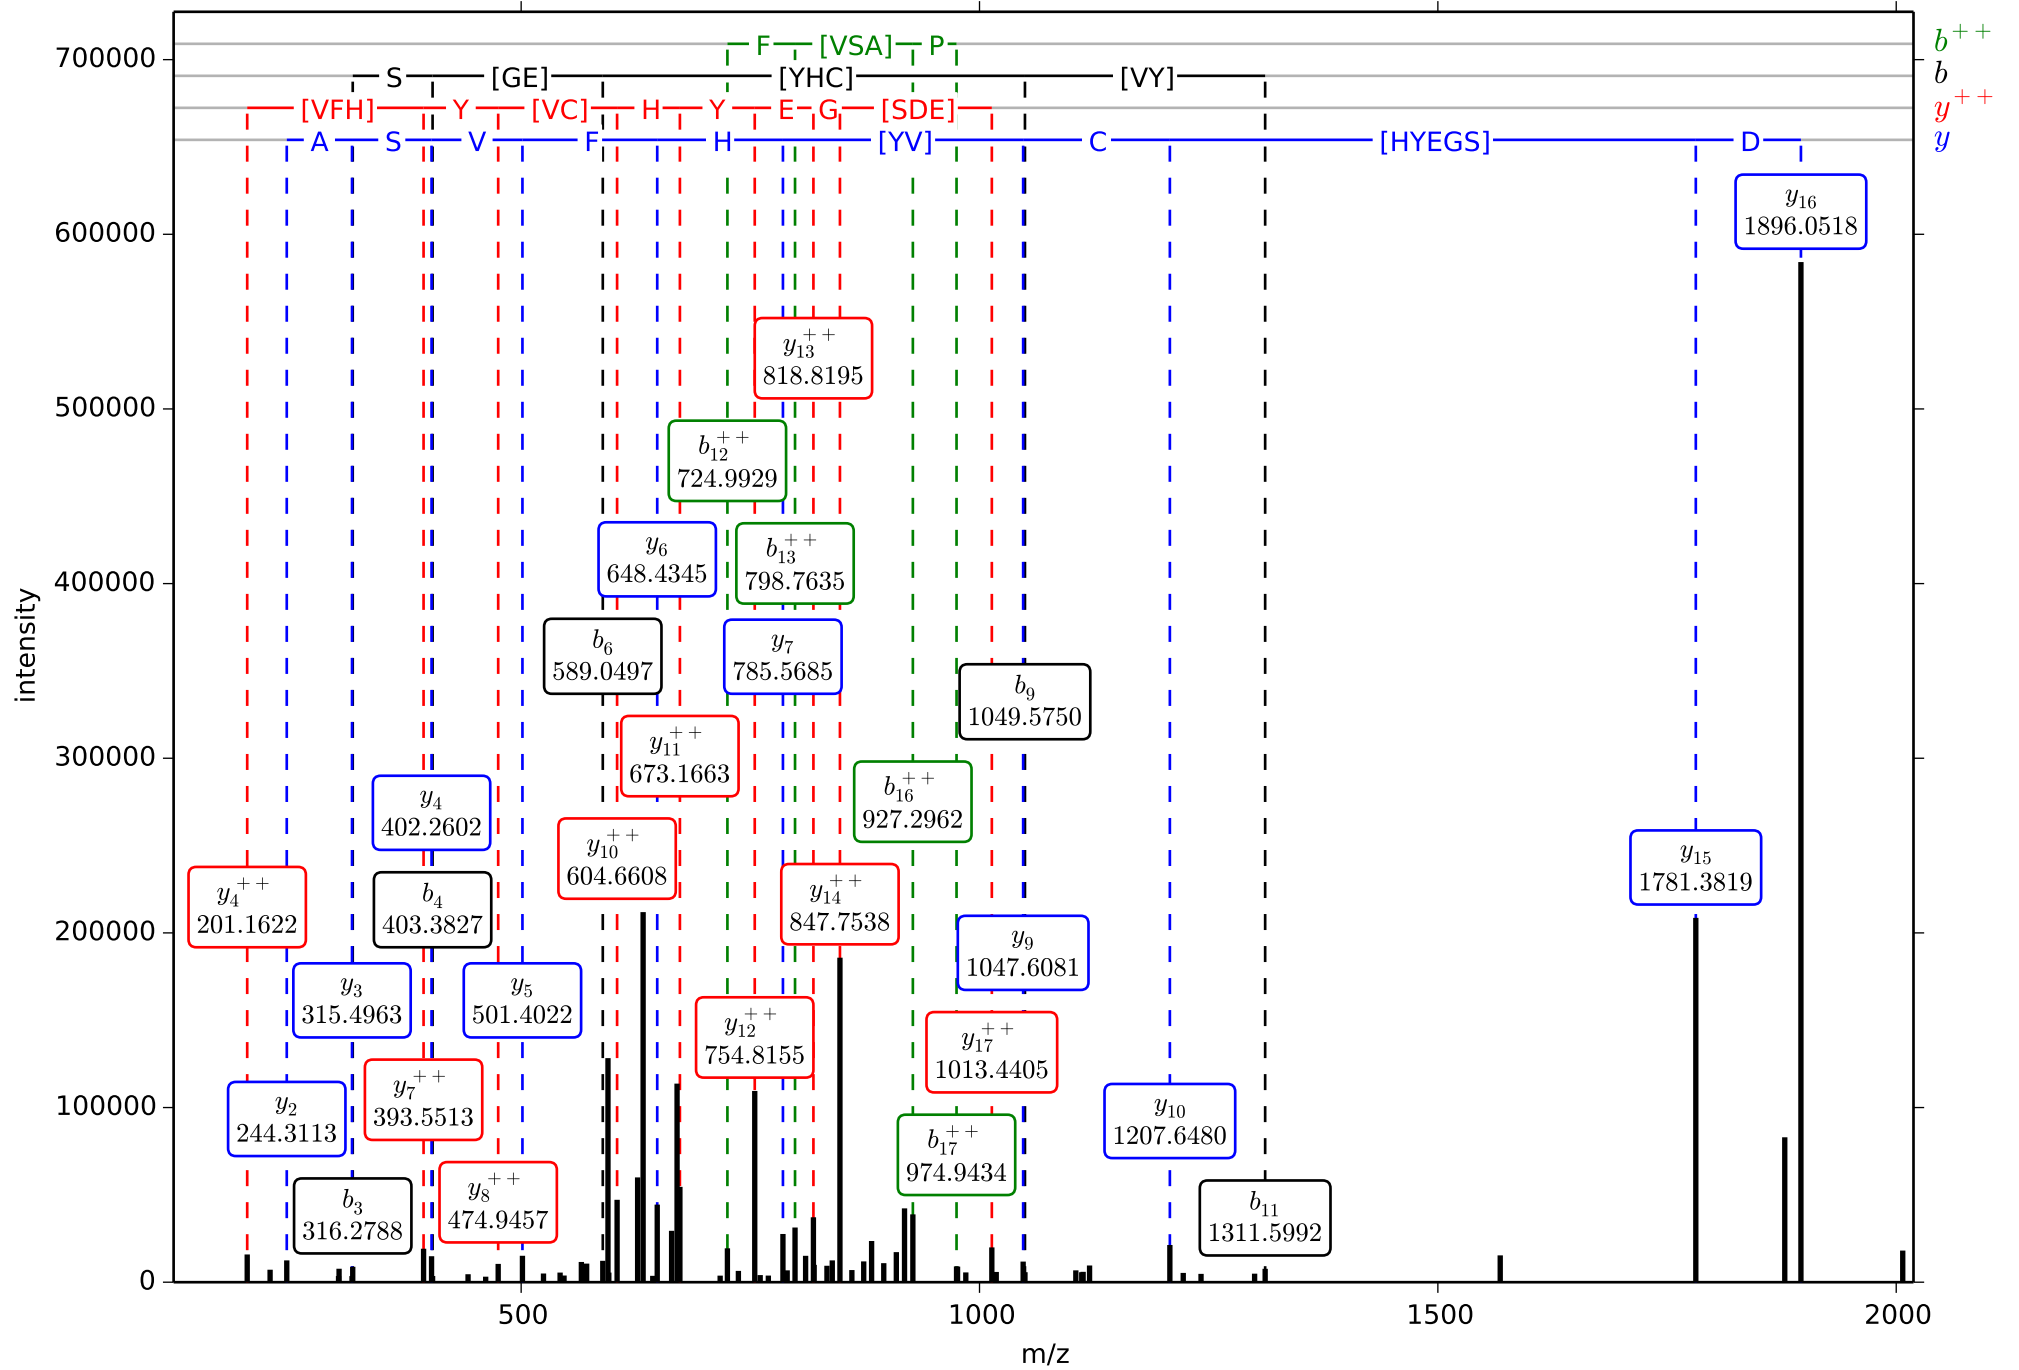

Q91WK5 : SCYEDGWLIK

parent: 635.789810,2+

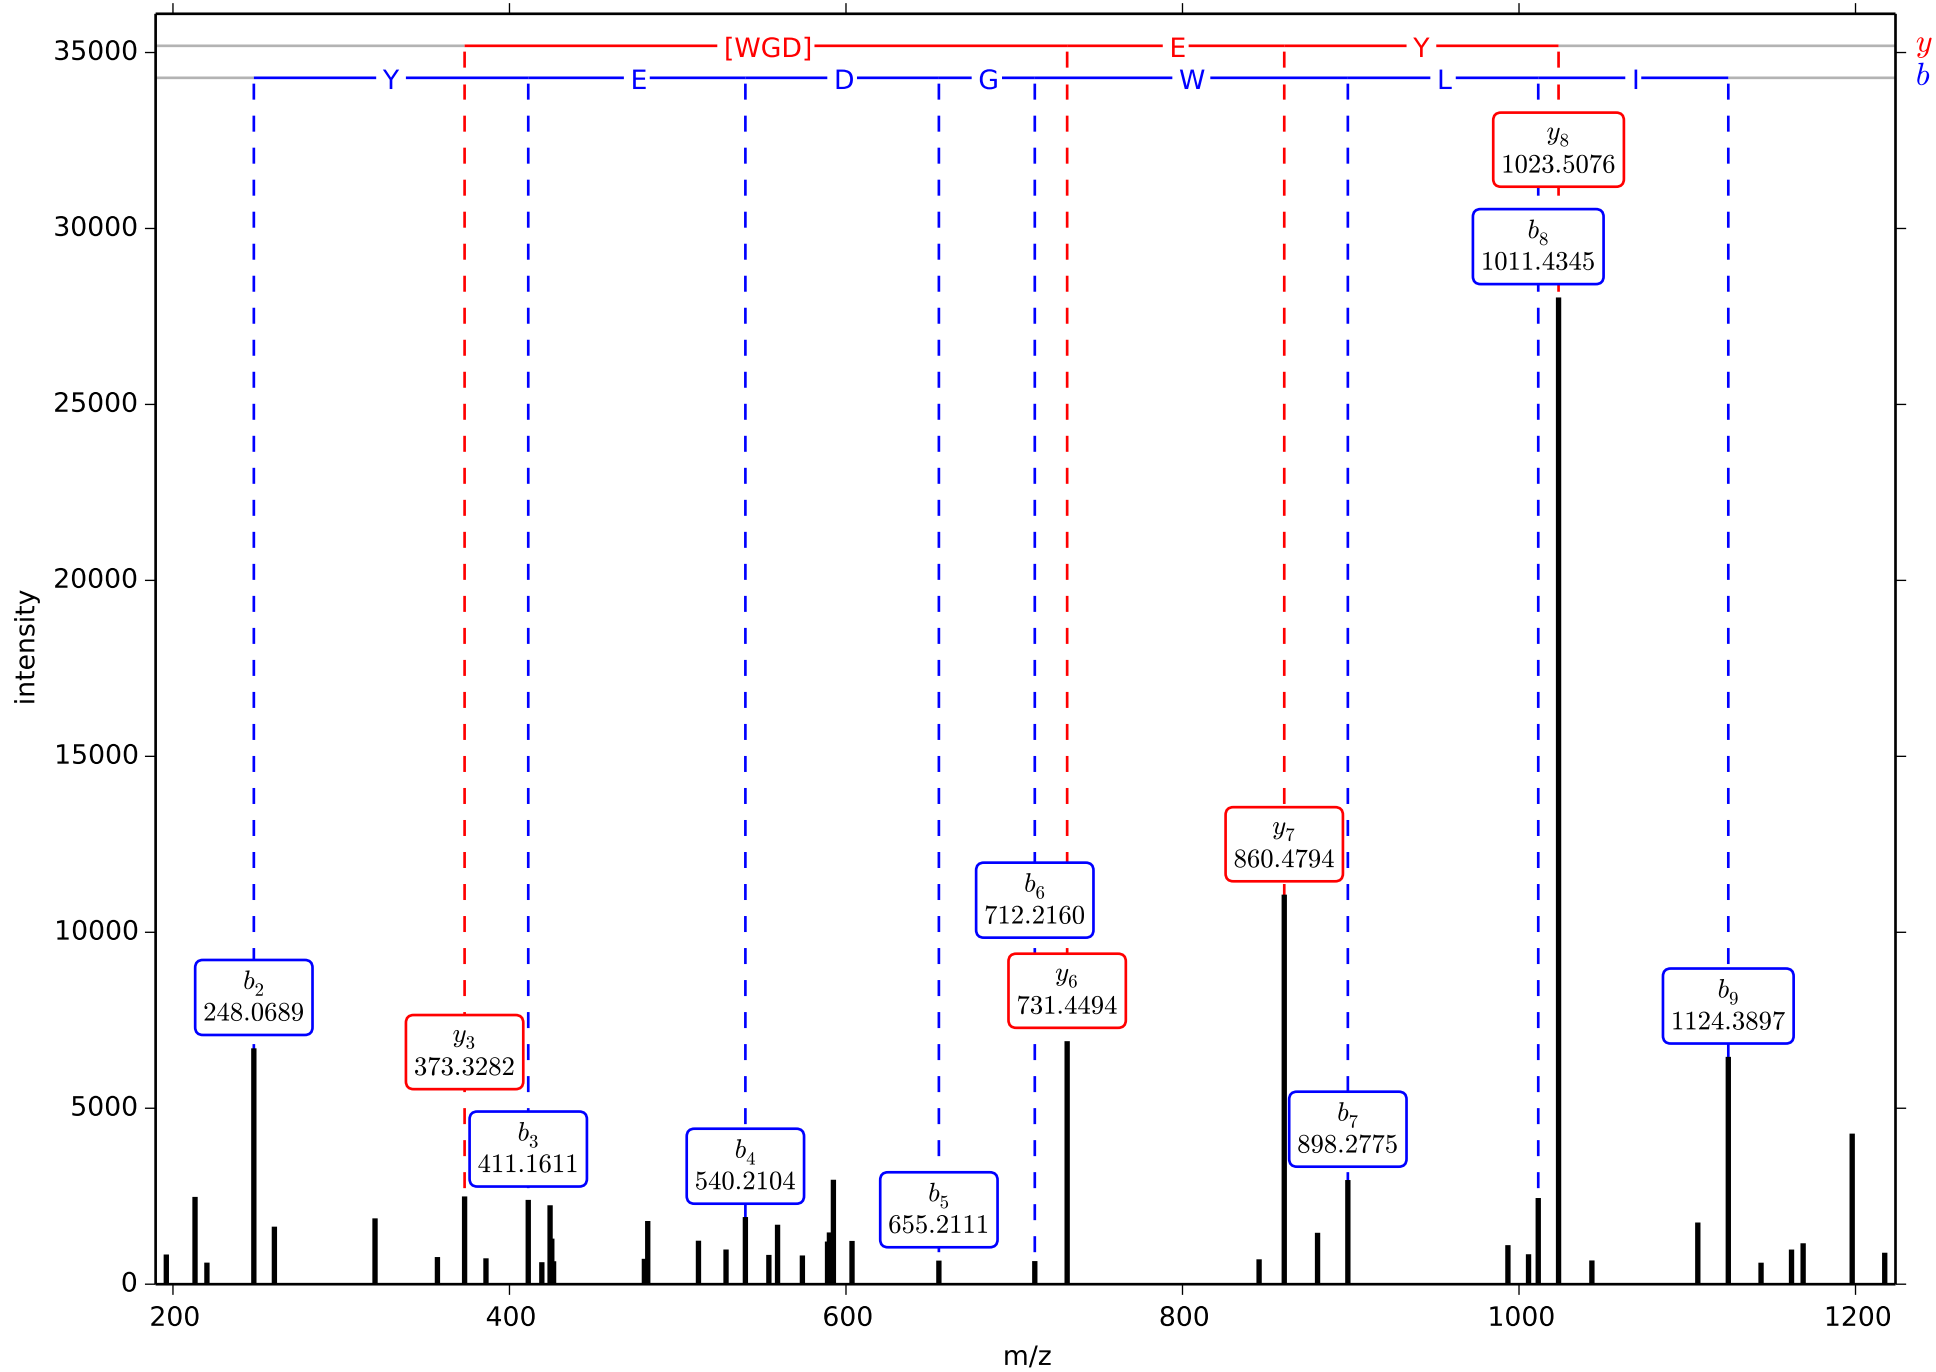

P18760 : AVLFCLSEDKK

parent: 655.346430,2+

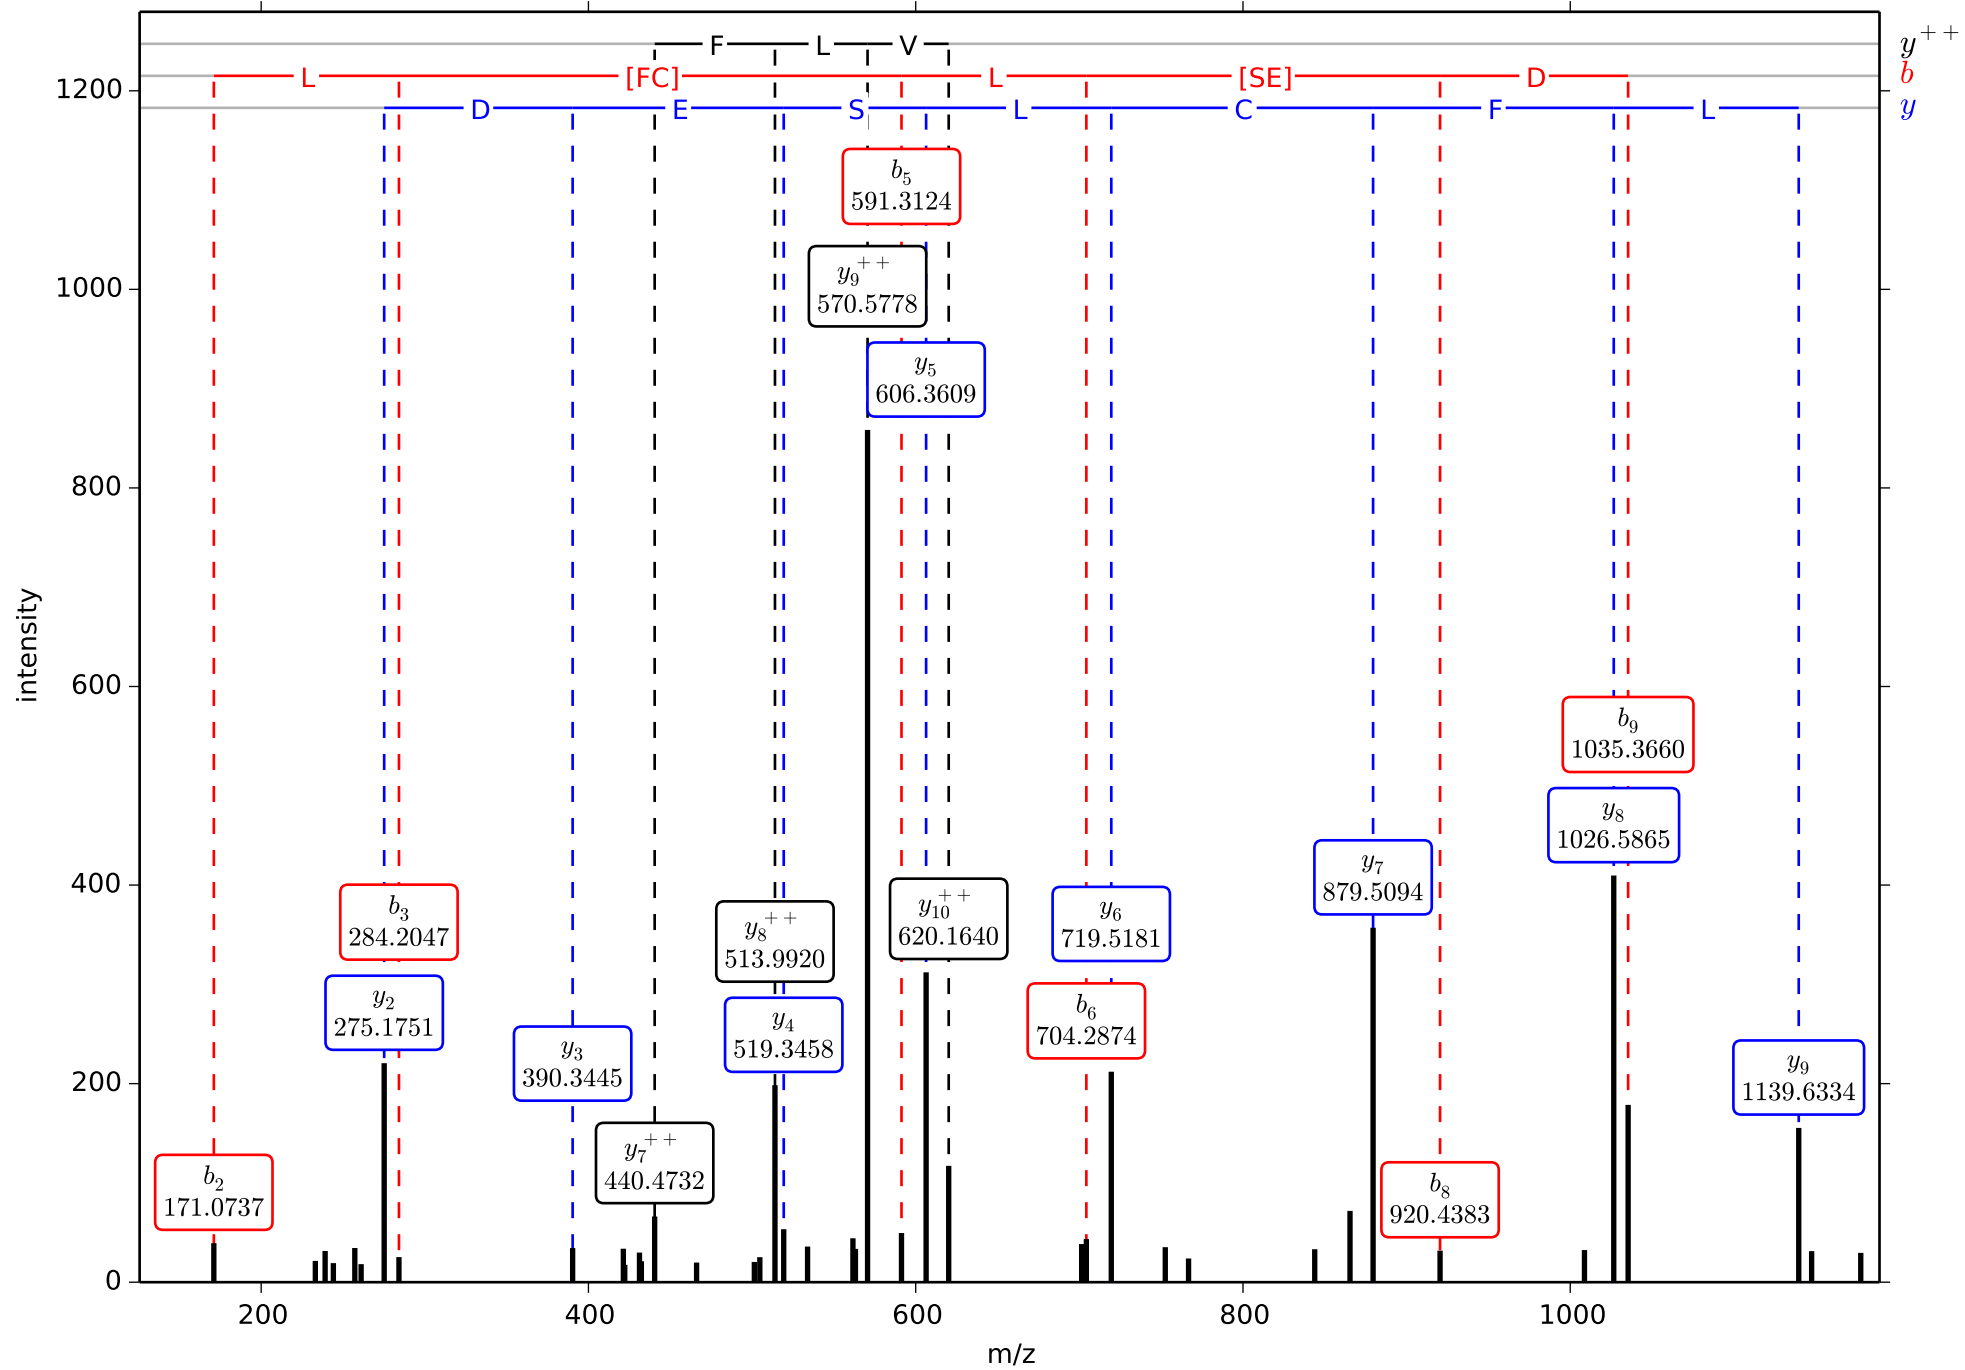



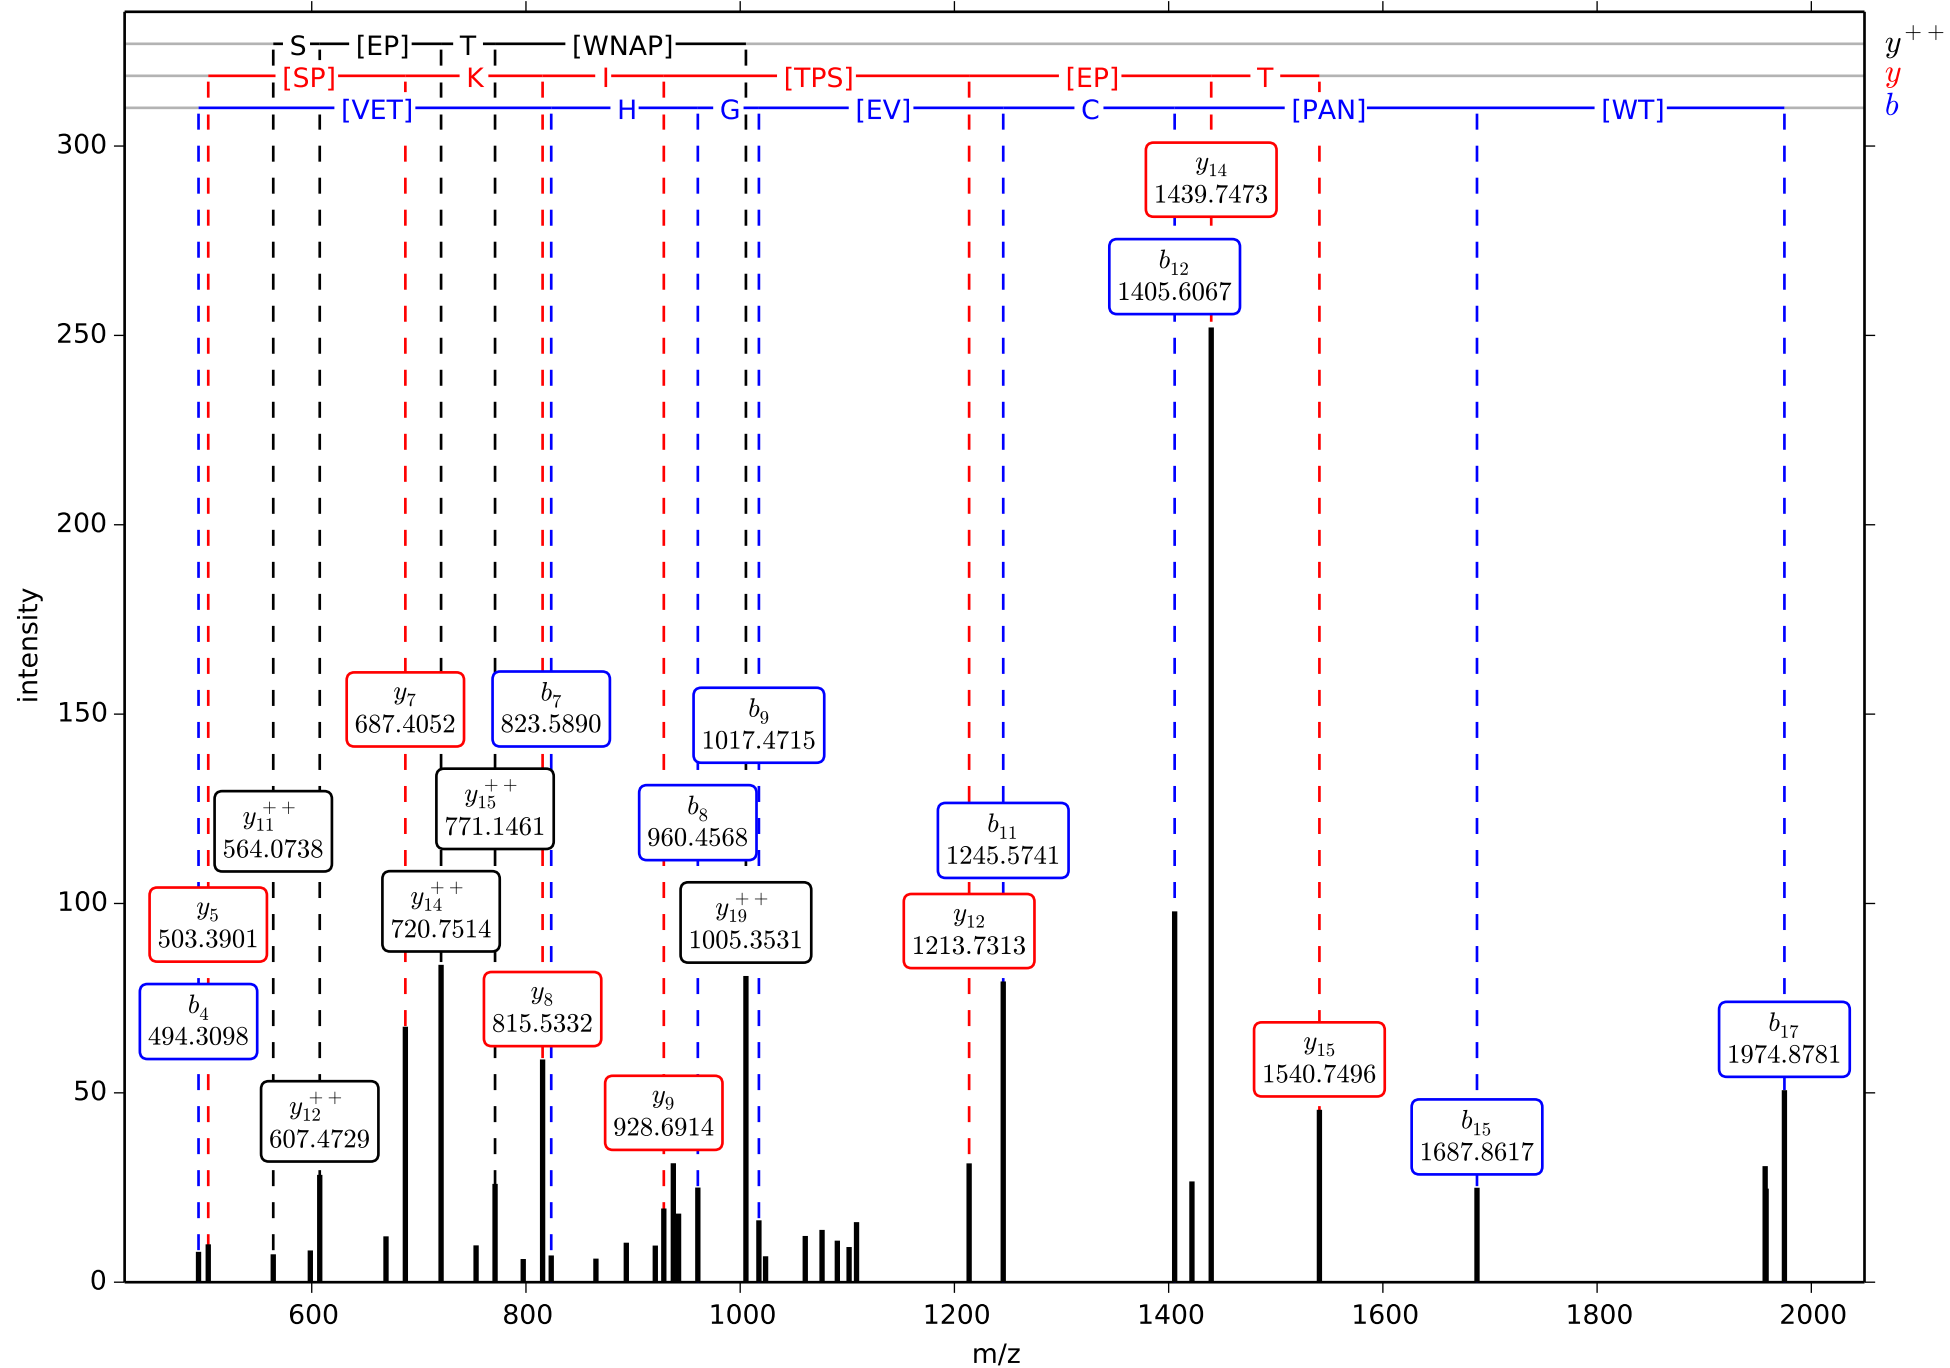

# Q99J16 : QWNNCAFLESSAK

parent: 777.847340,2+

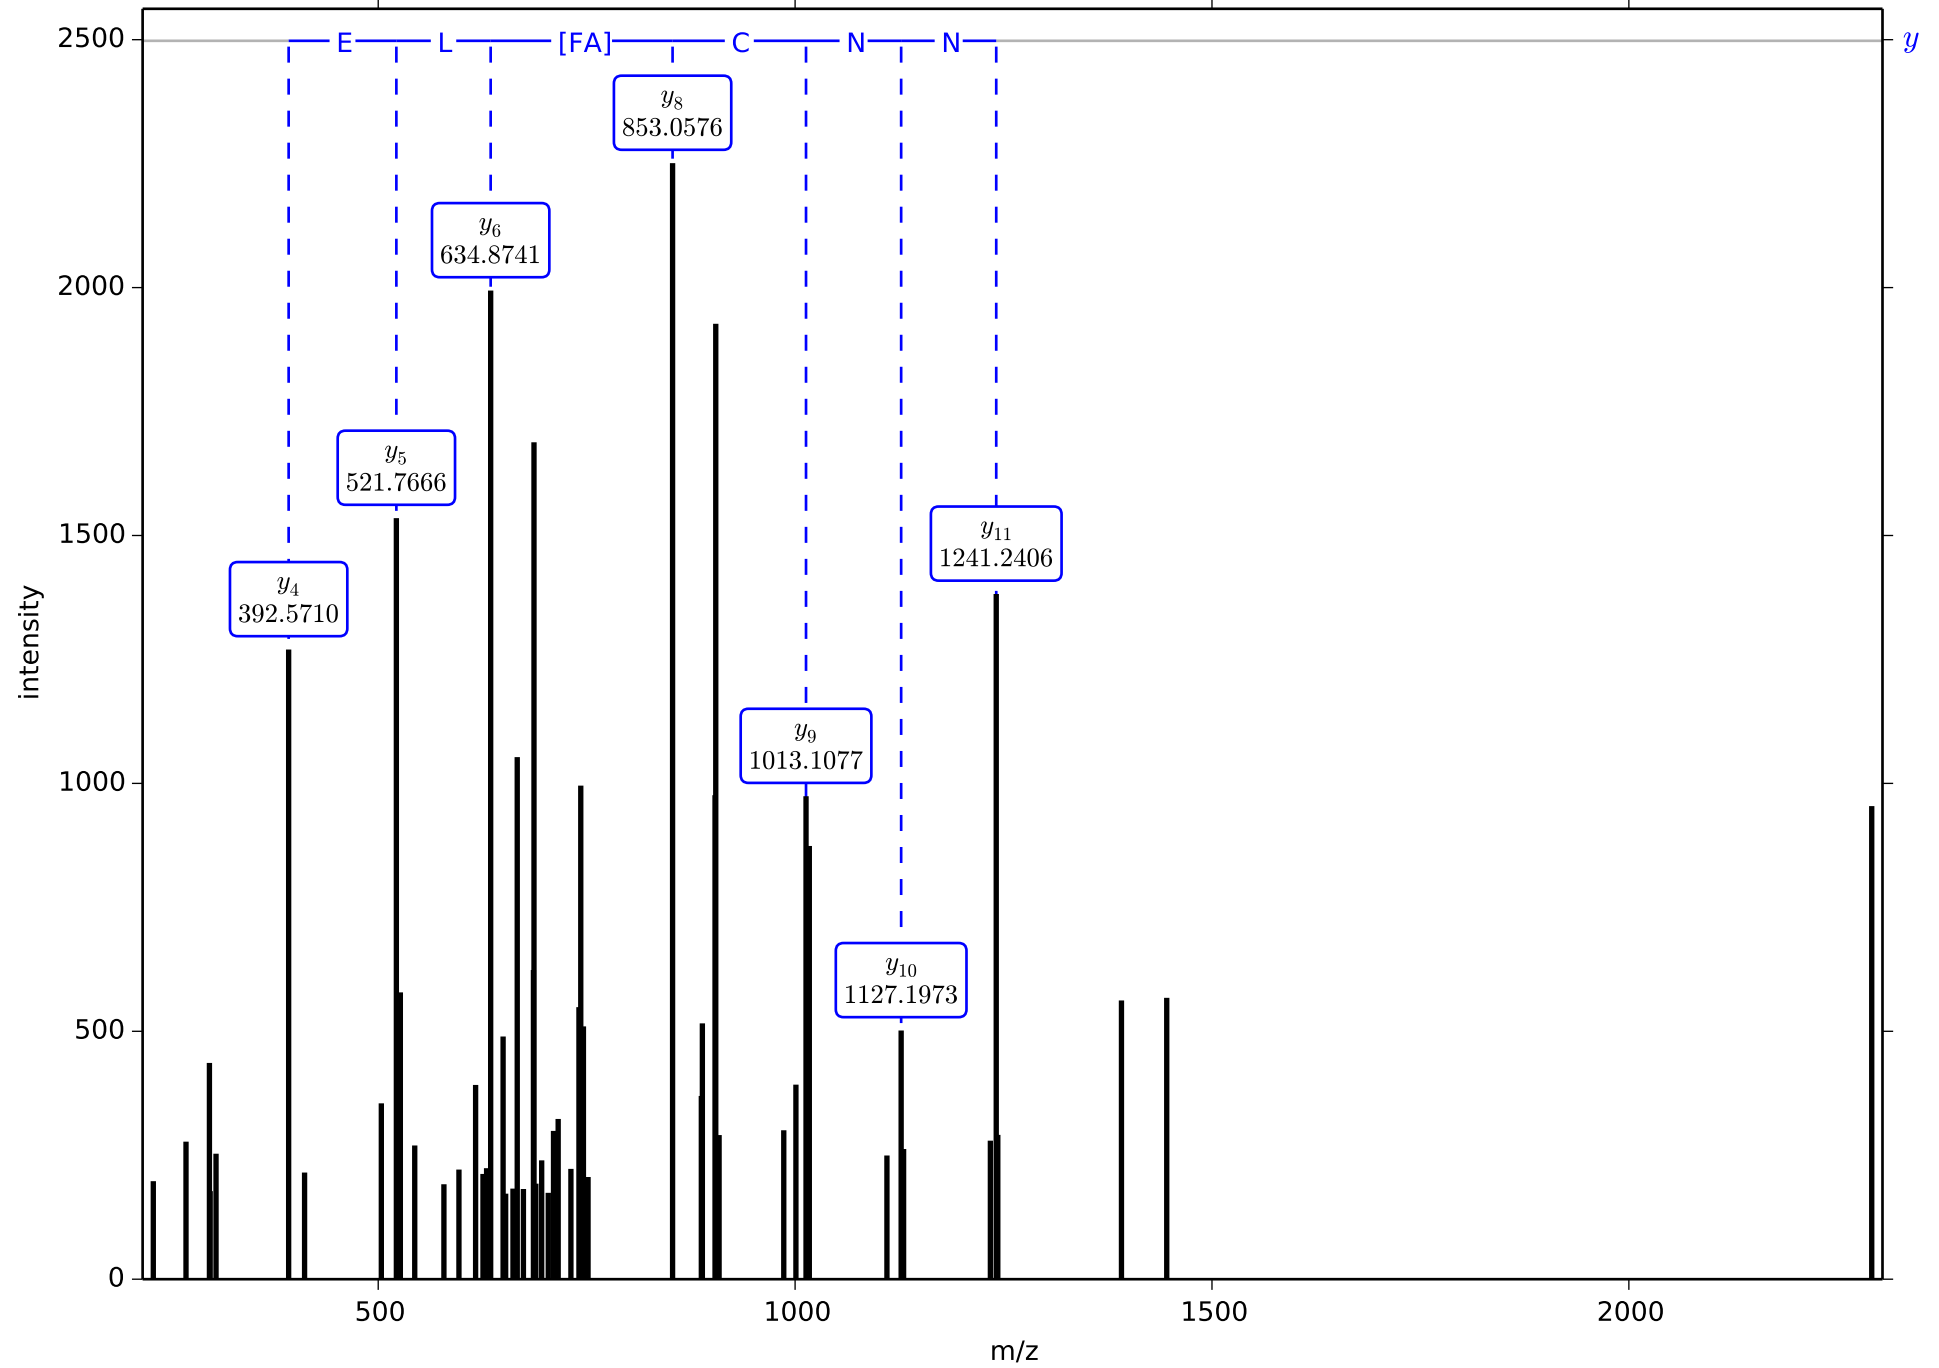

Q9WV34 : DLELTPTSGTLCGSLSGK

parent: 918.460060,2+

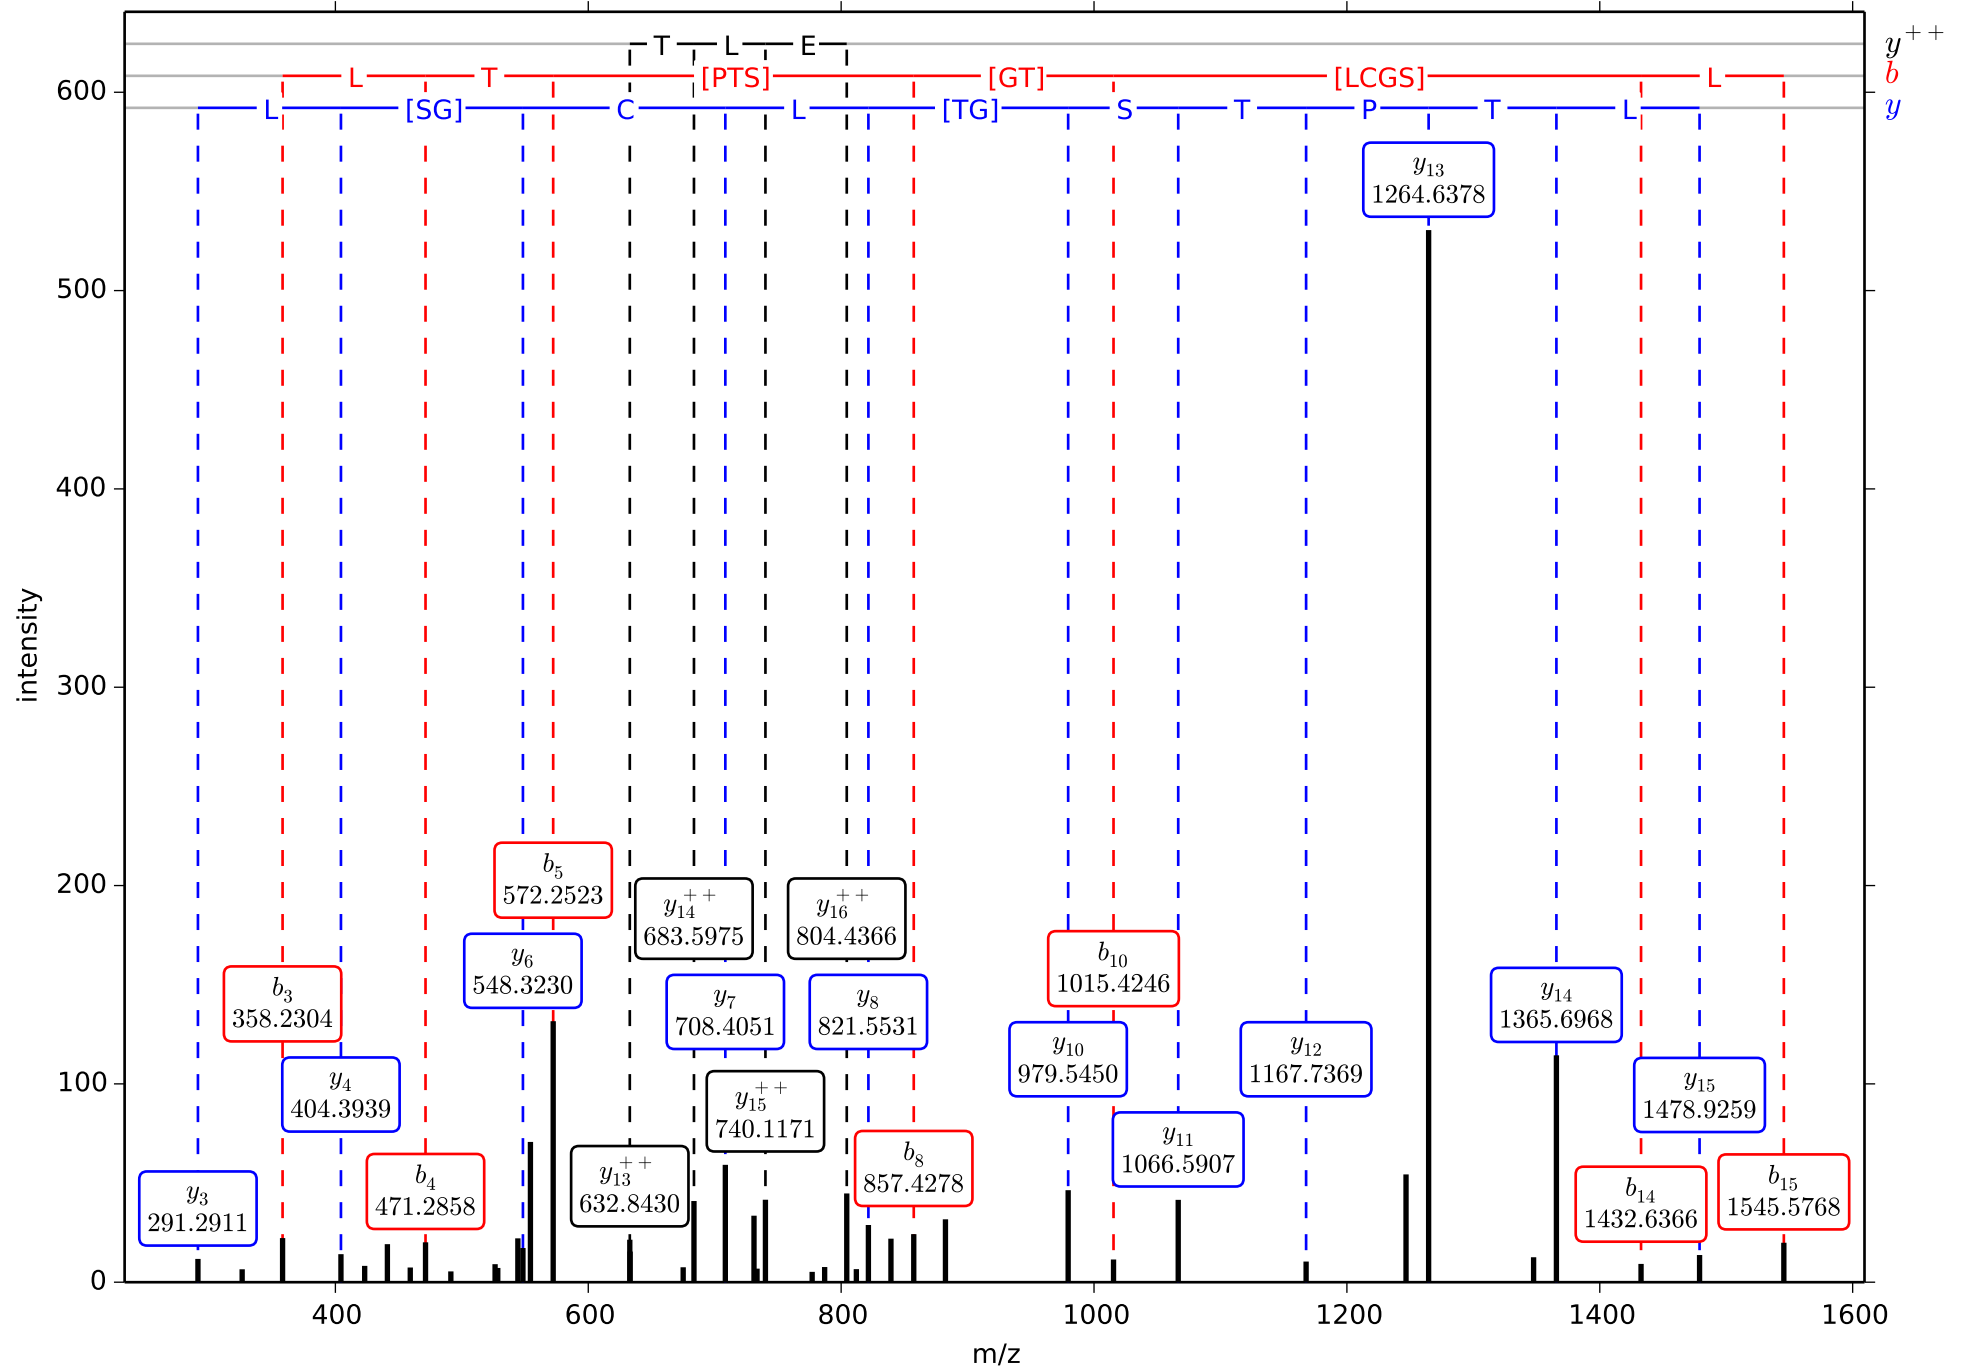

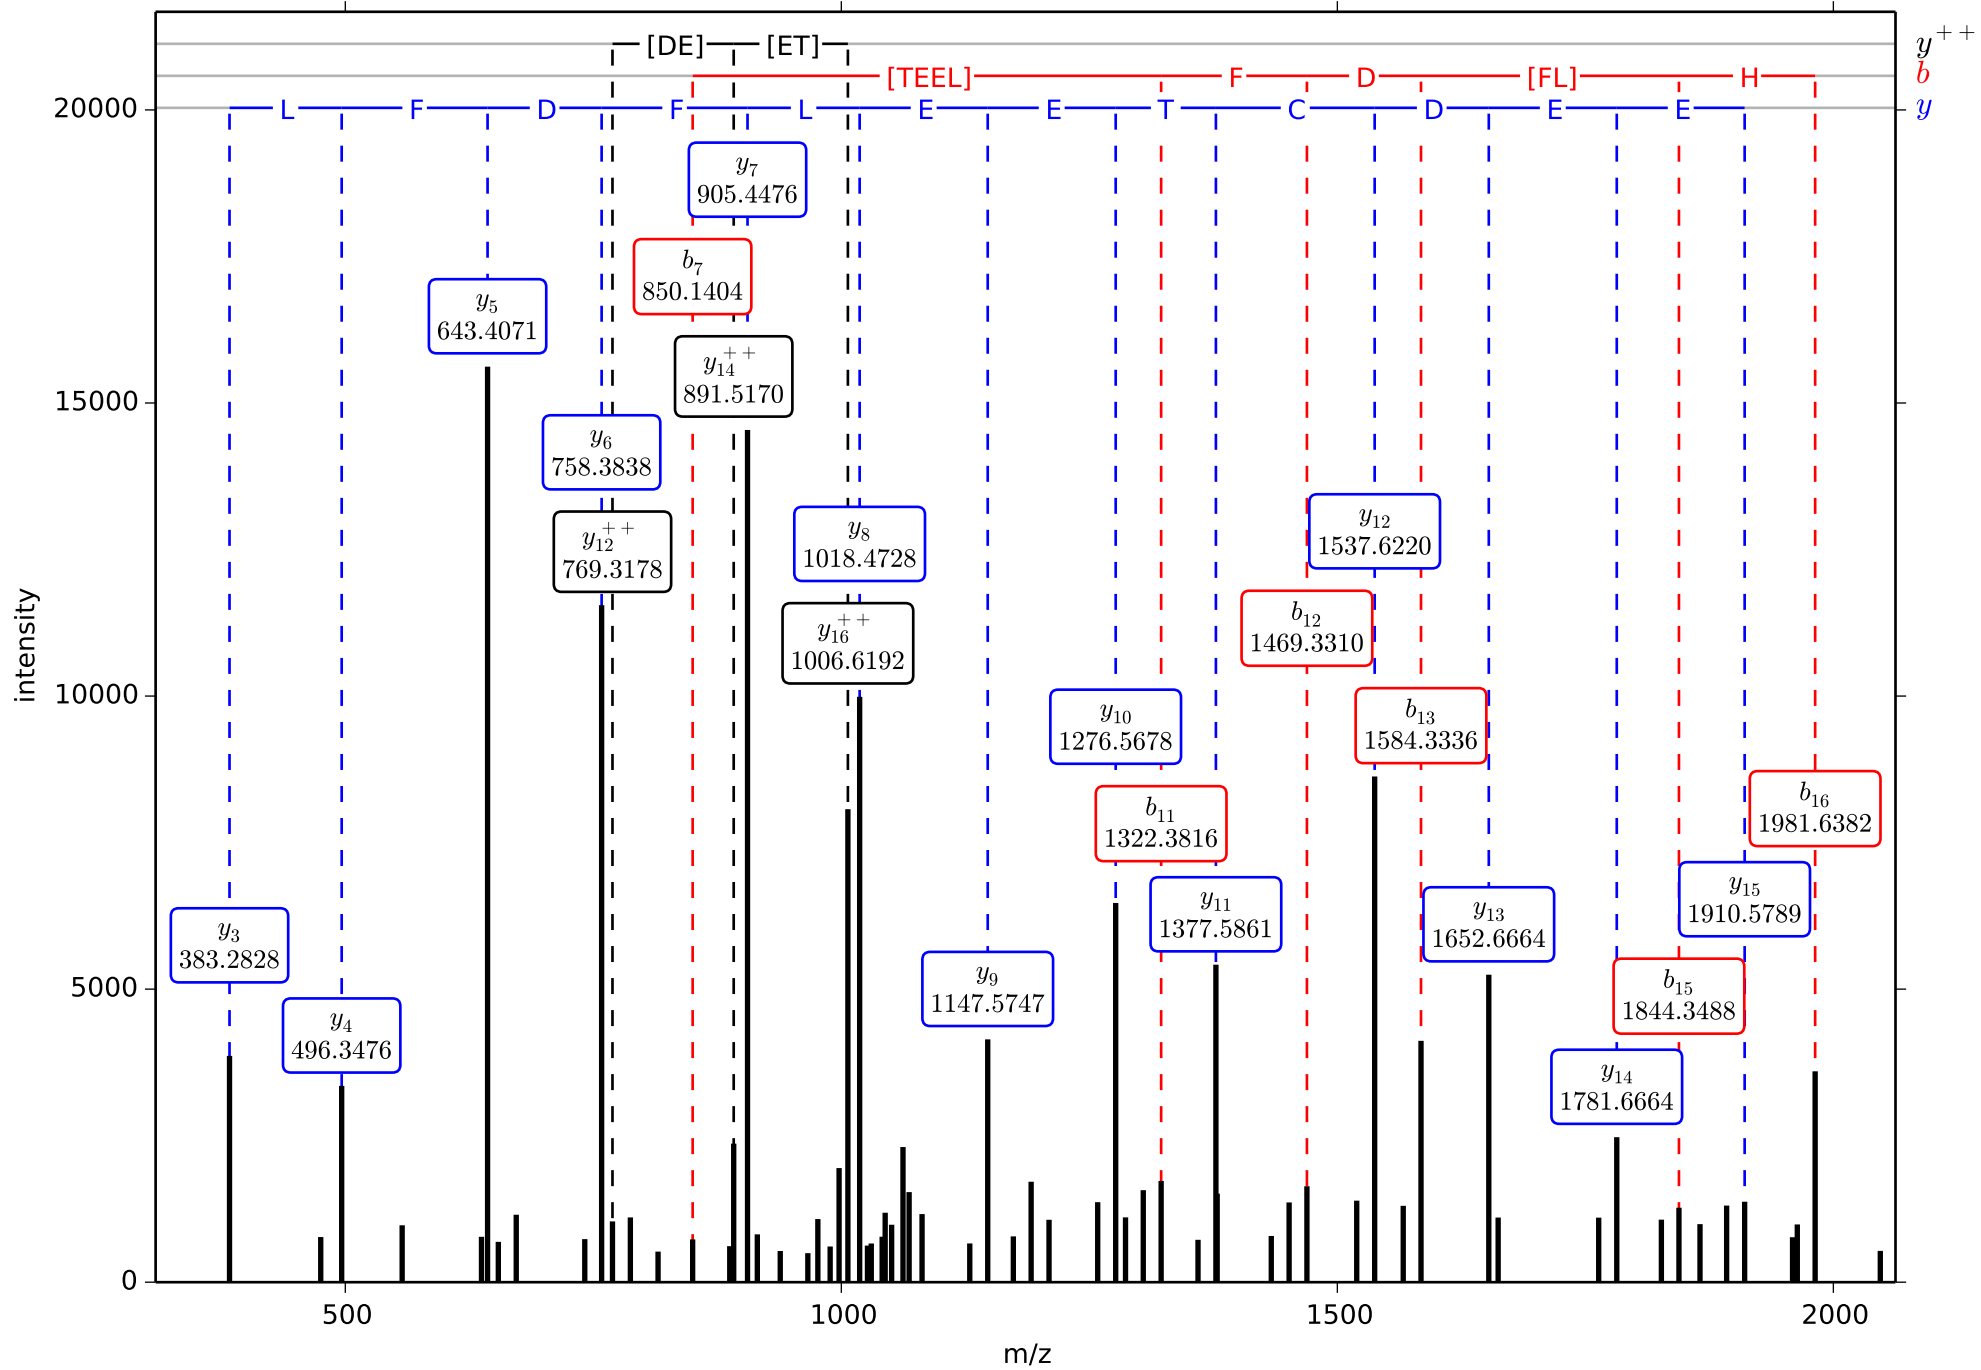

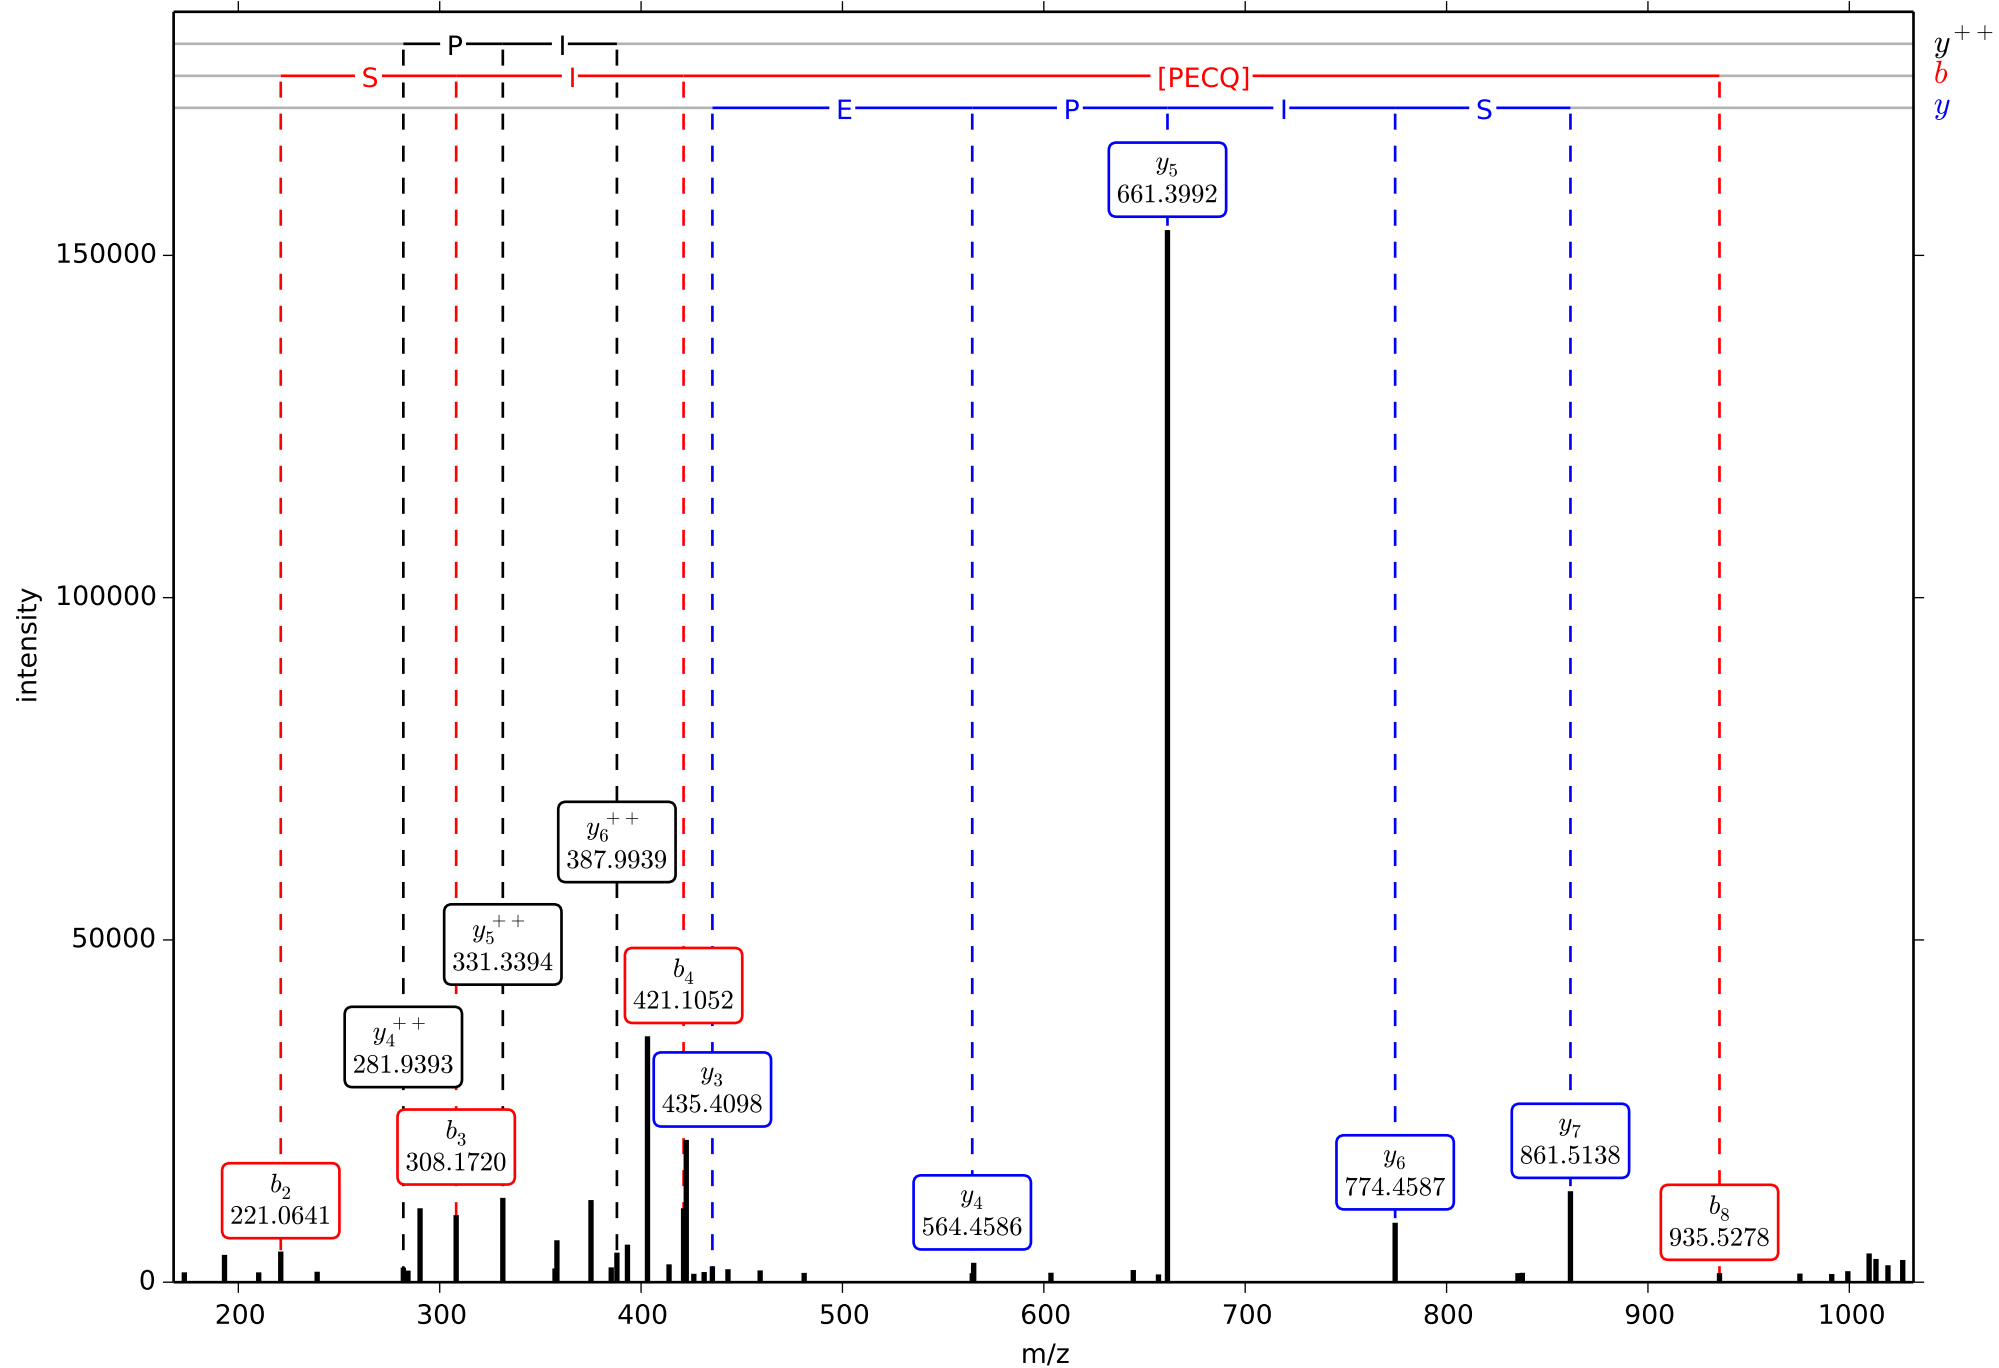

O35874 : CLEENNGVDKR

parent: 667.308250,2+

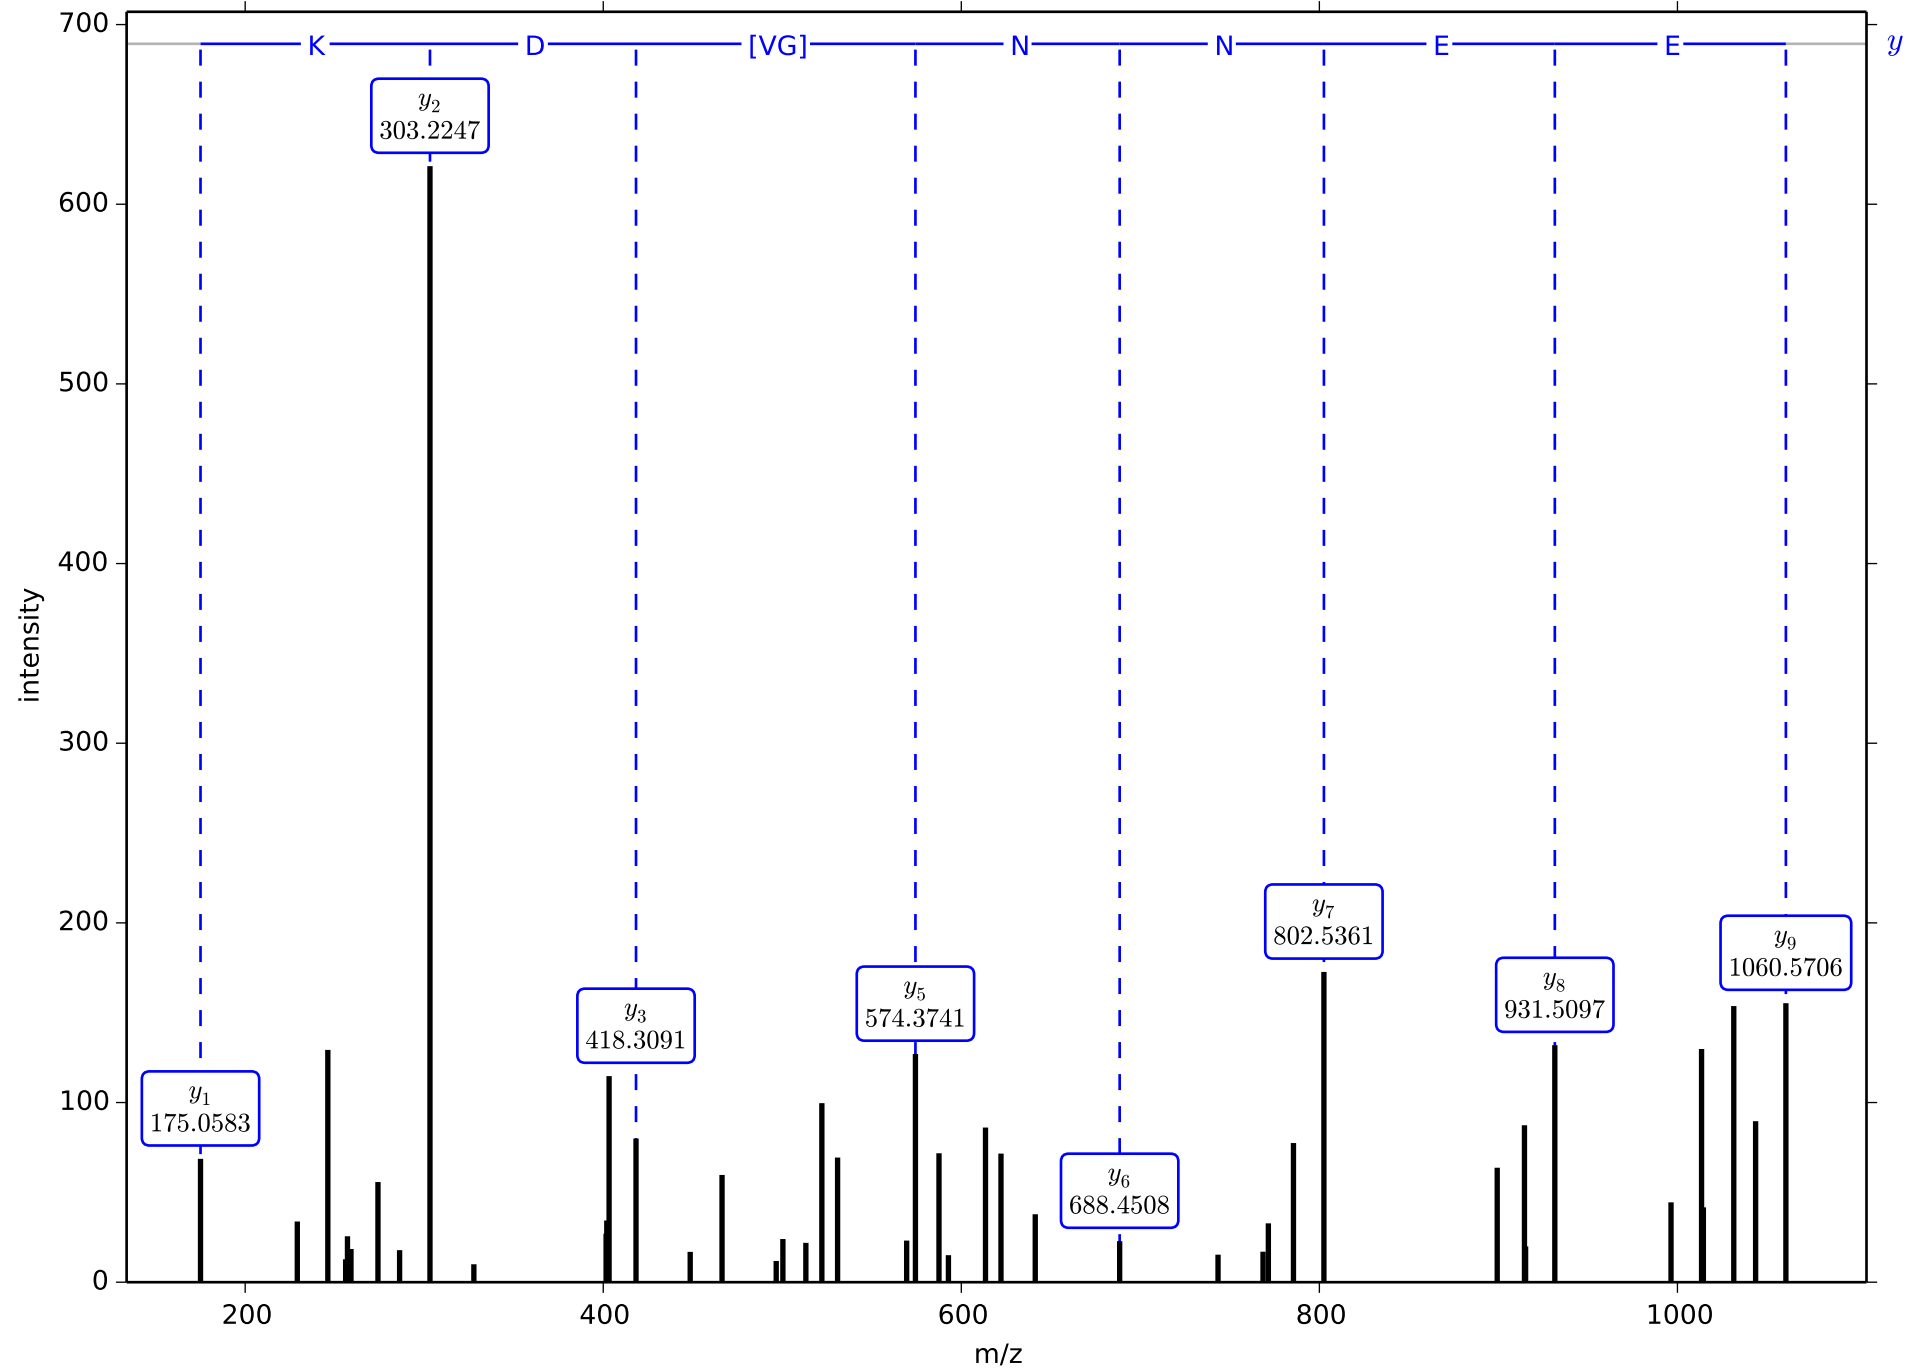

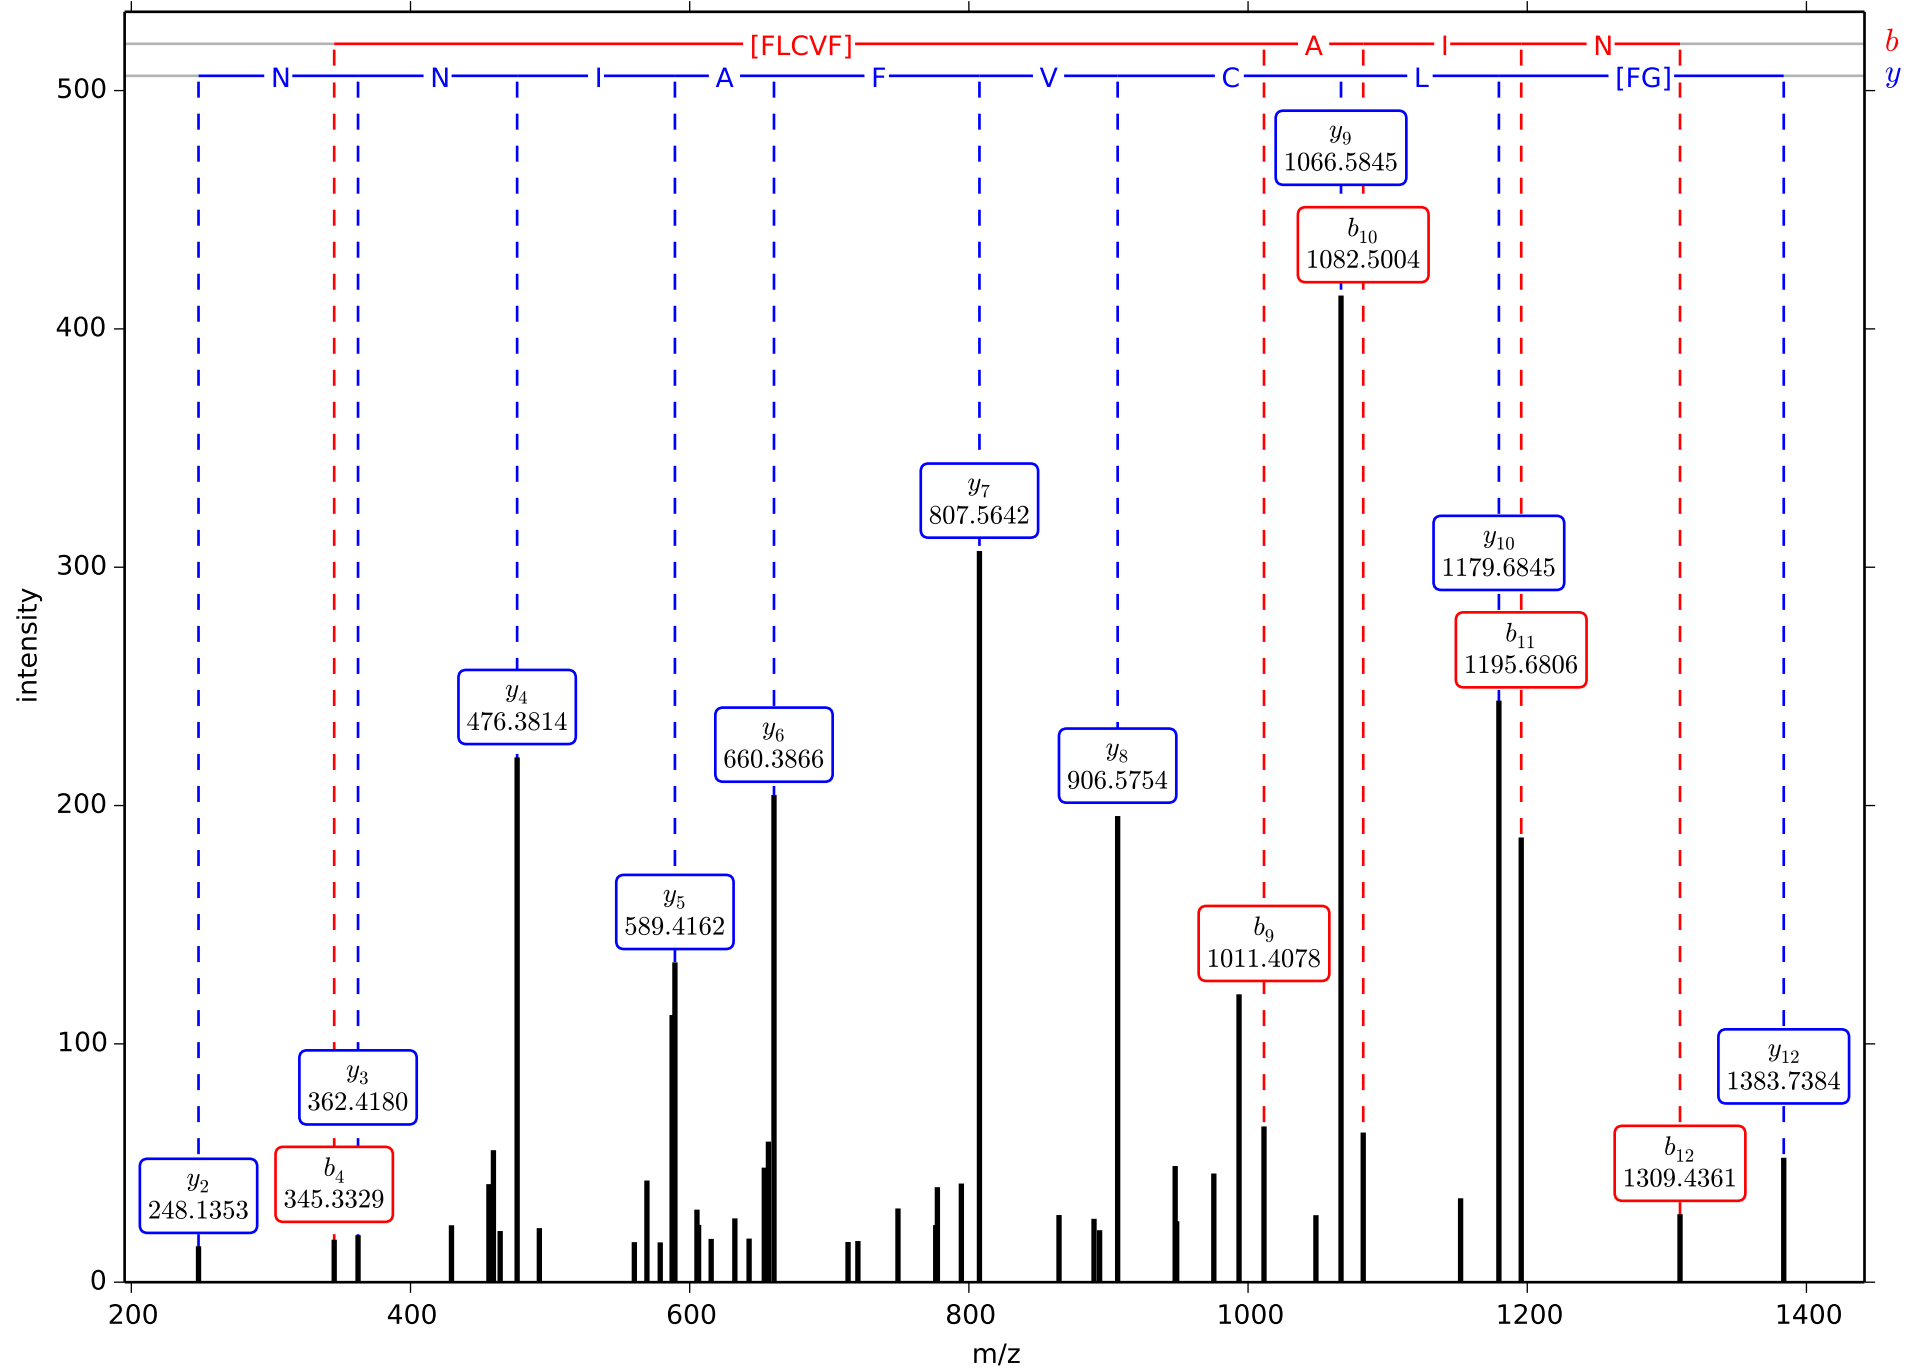

Q62277 : LHQVYFDAPSCVKGGTTK

parent: 1004.516200,2+

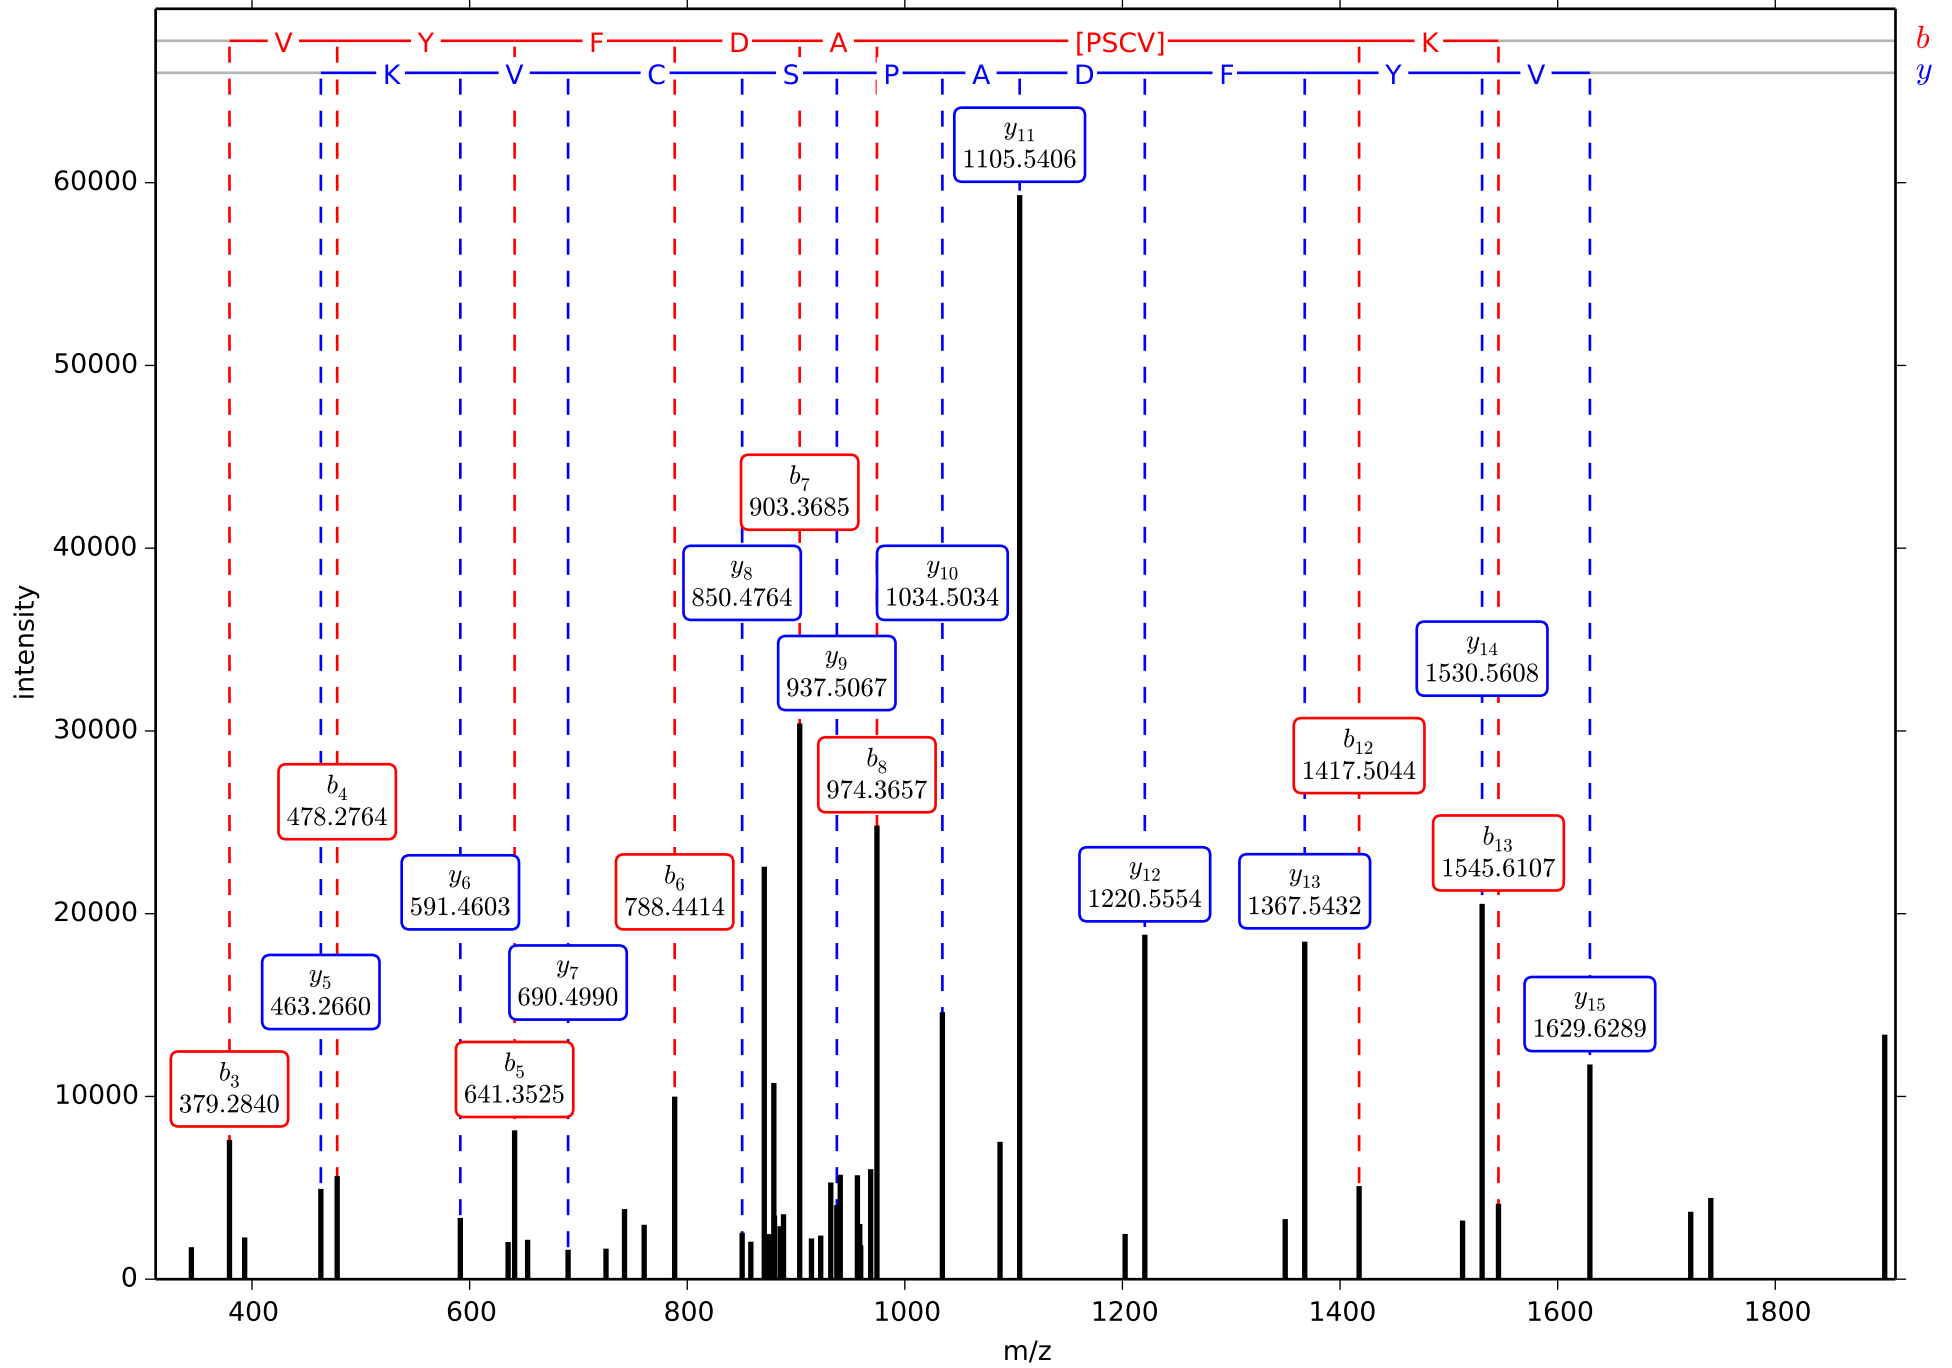



Q62277 : LHQVYFDAPSCVK

parent: 782.388230,2+

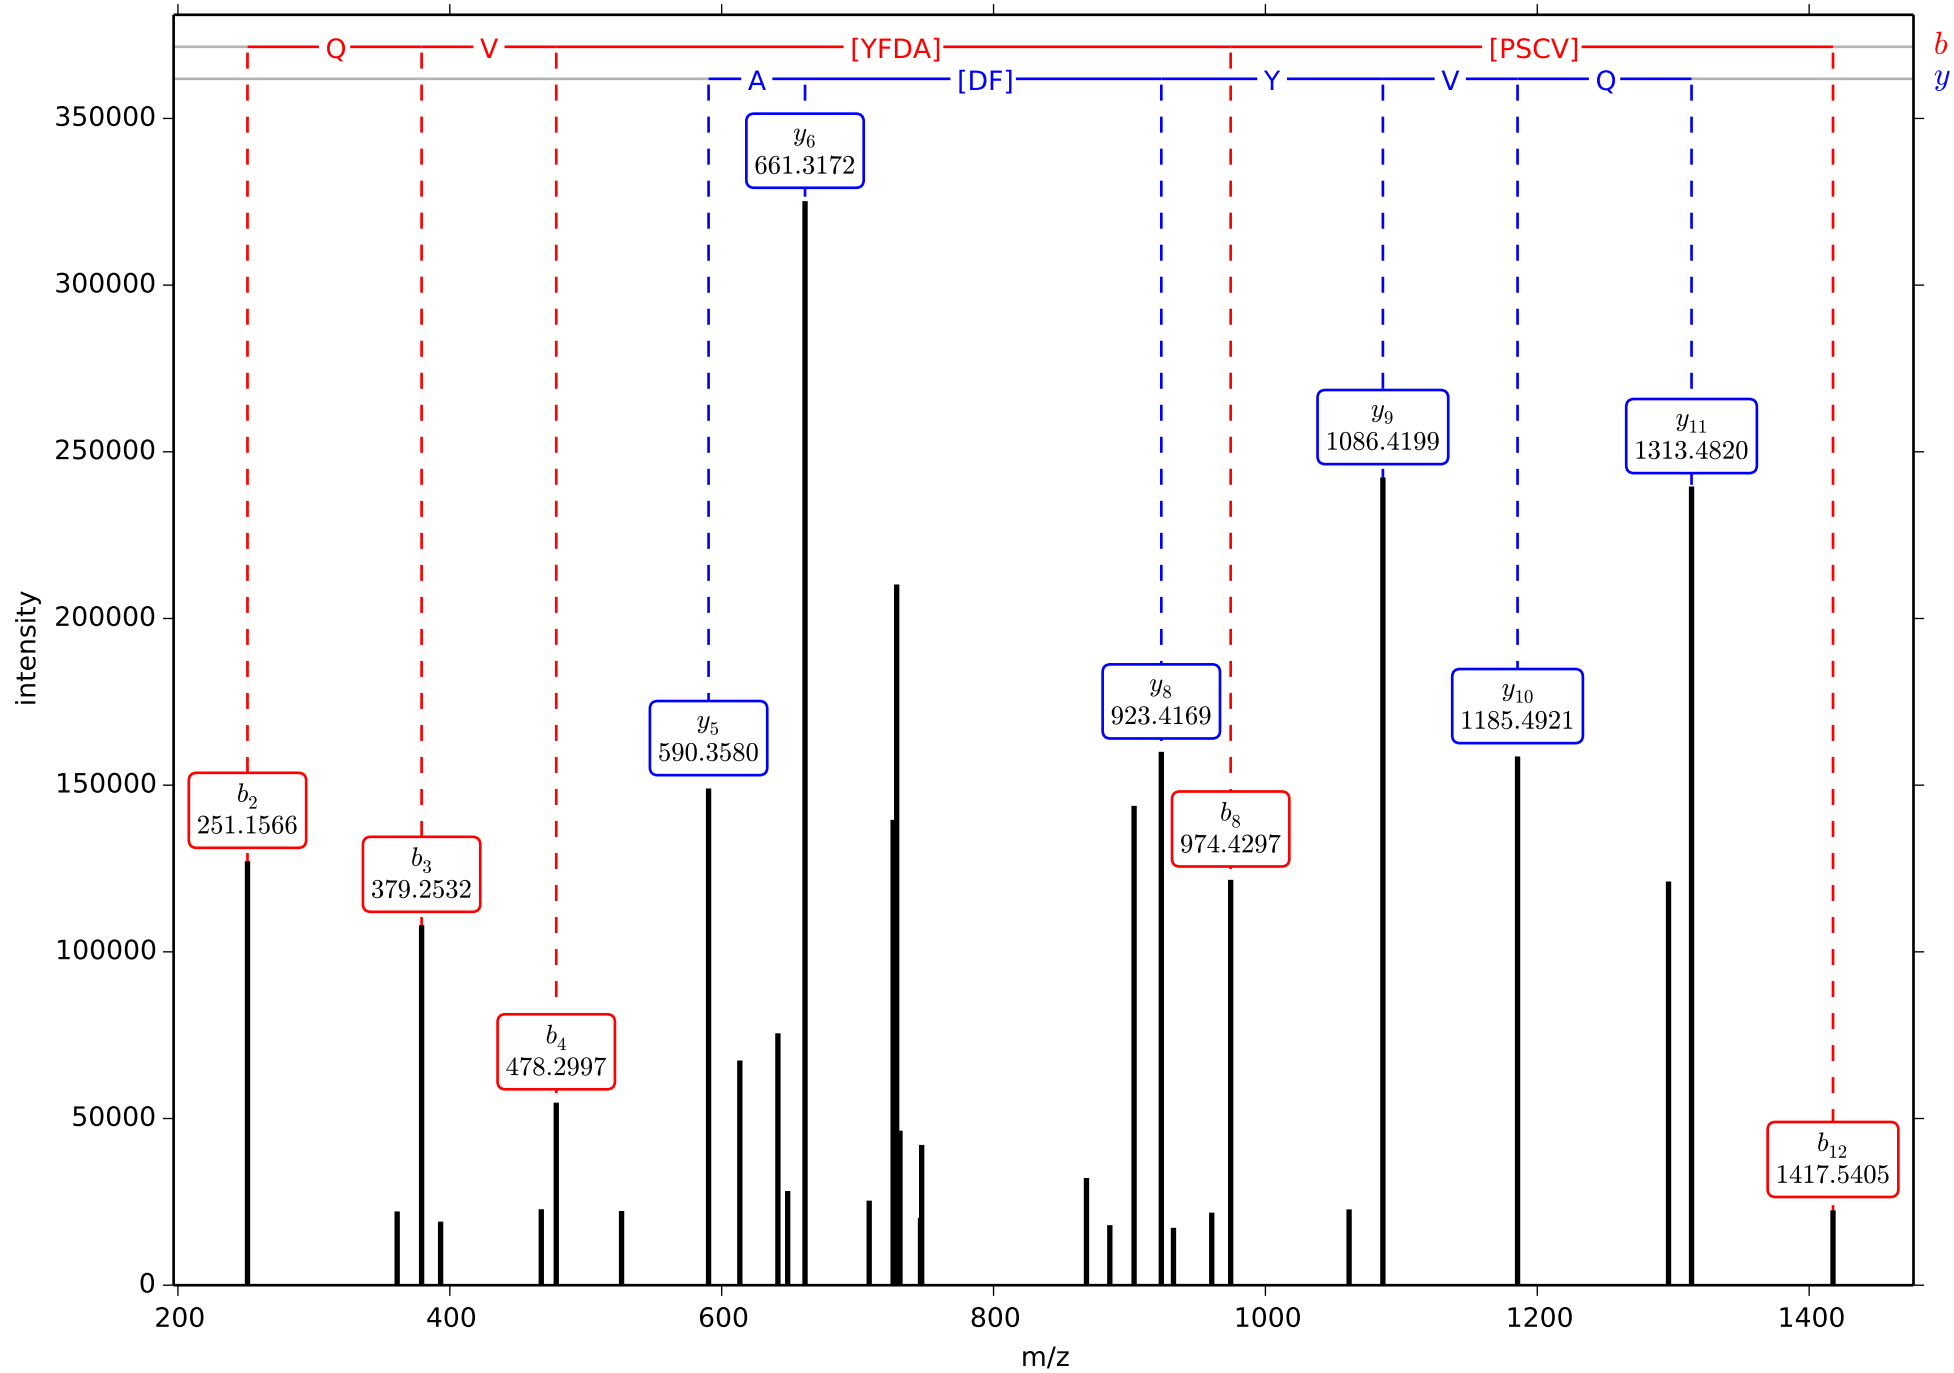

Q9JLZ3 : SEVPGIFCAGADLK

parent: 732.373060,2+

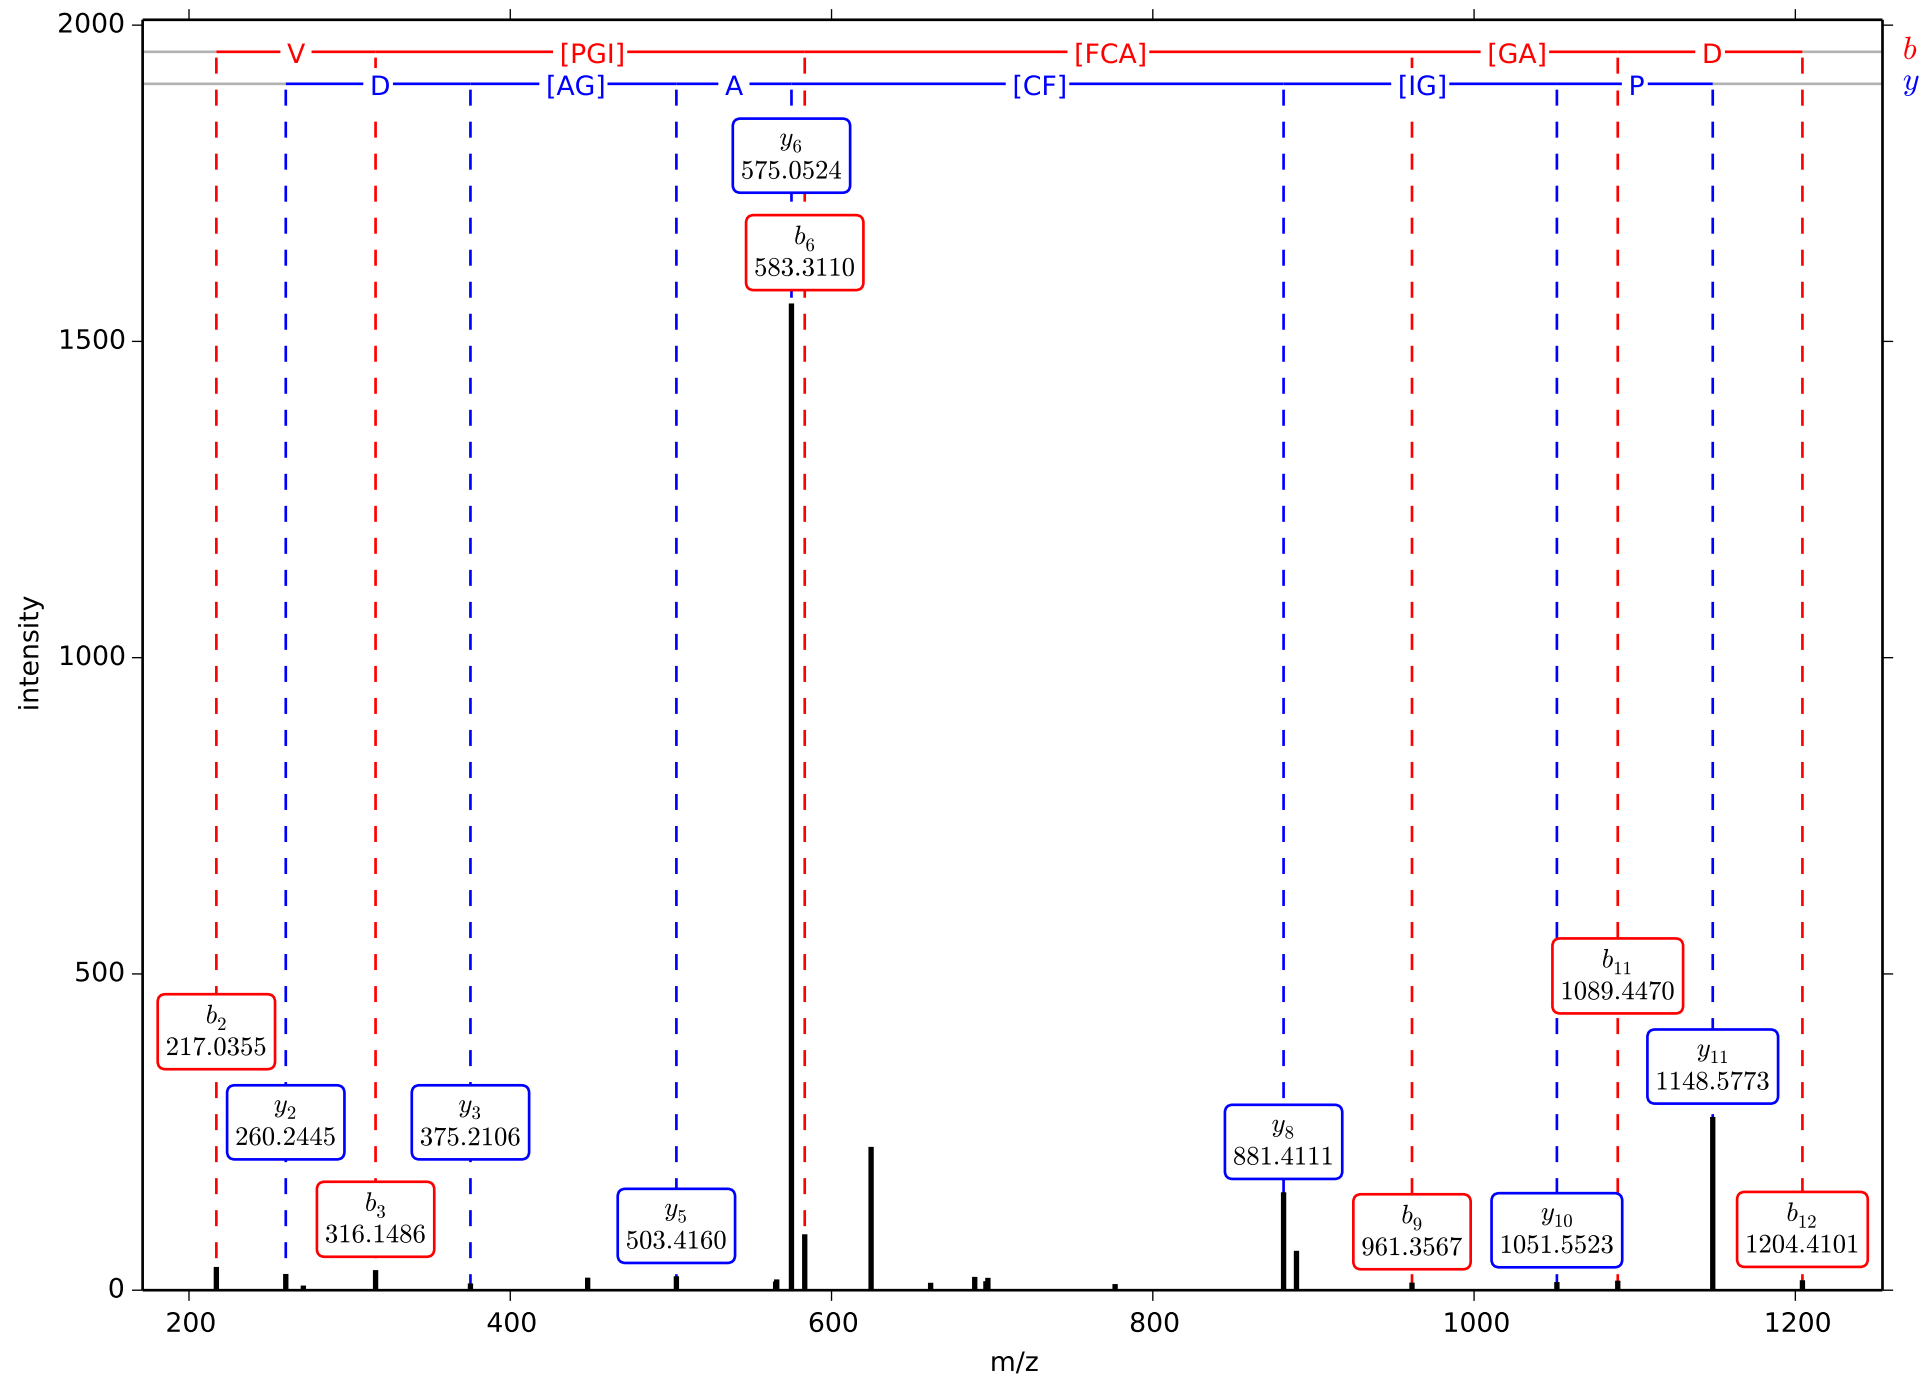

Q9D8B4 : EKPDPLNYFIGGCAGGLTLGAR

parent: 1211.113700,2+

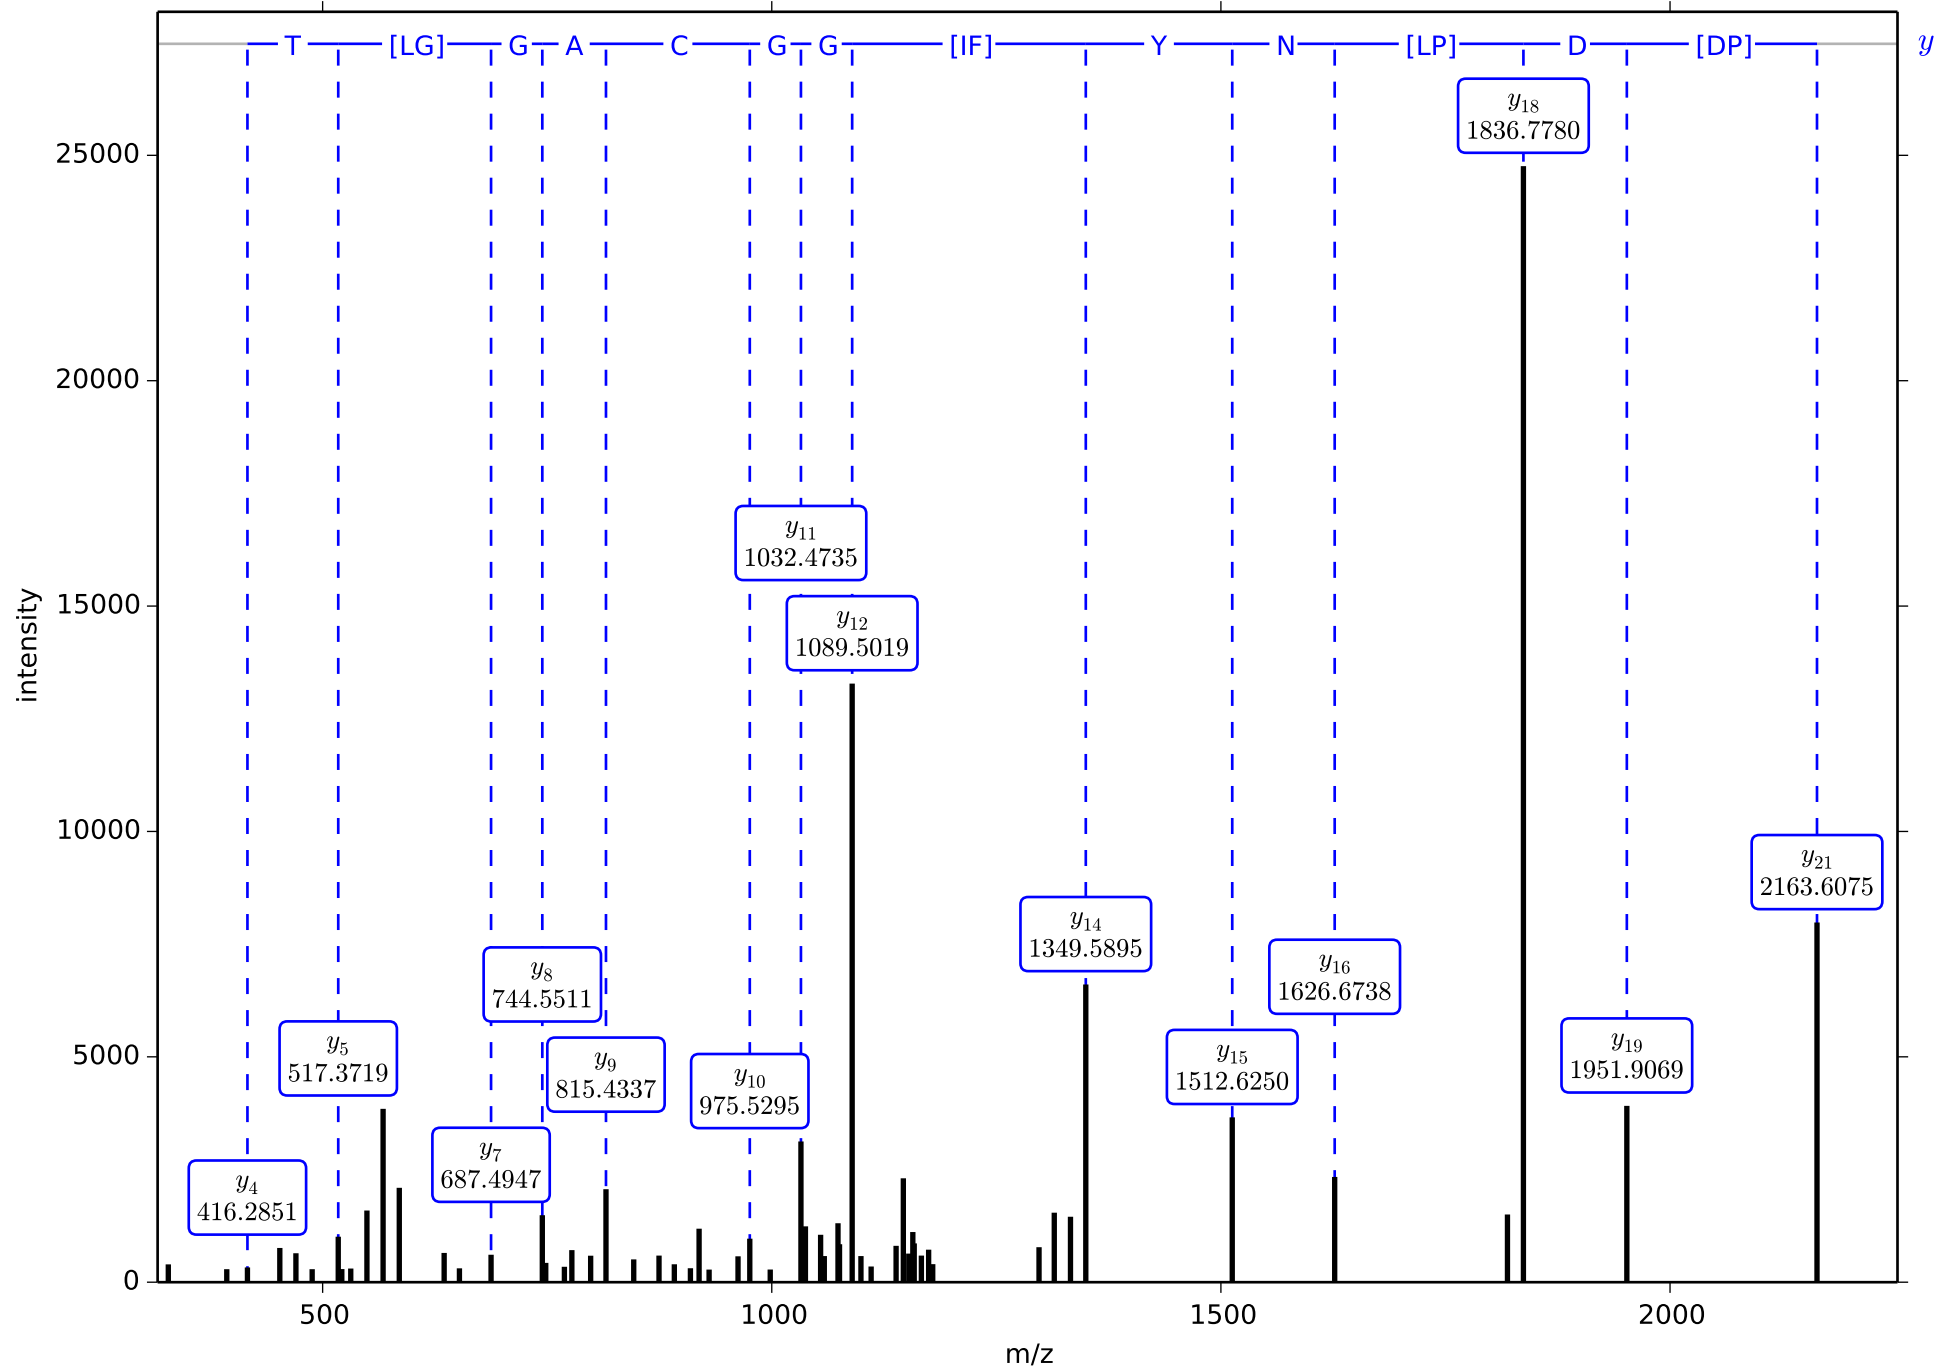

Q60931 : VCNYGLTFTQK

parent: 665.826120,2+

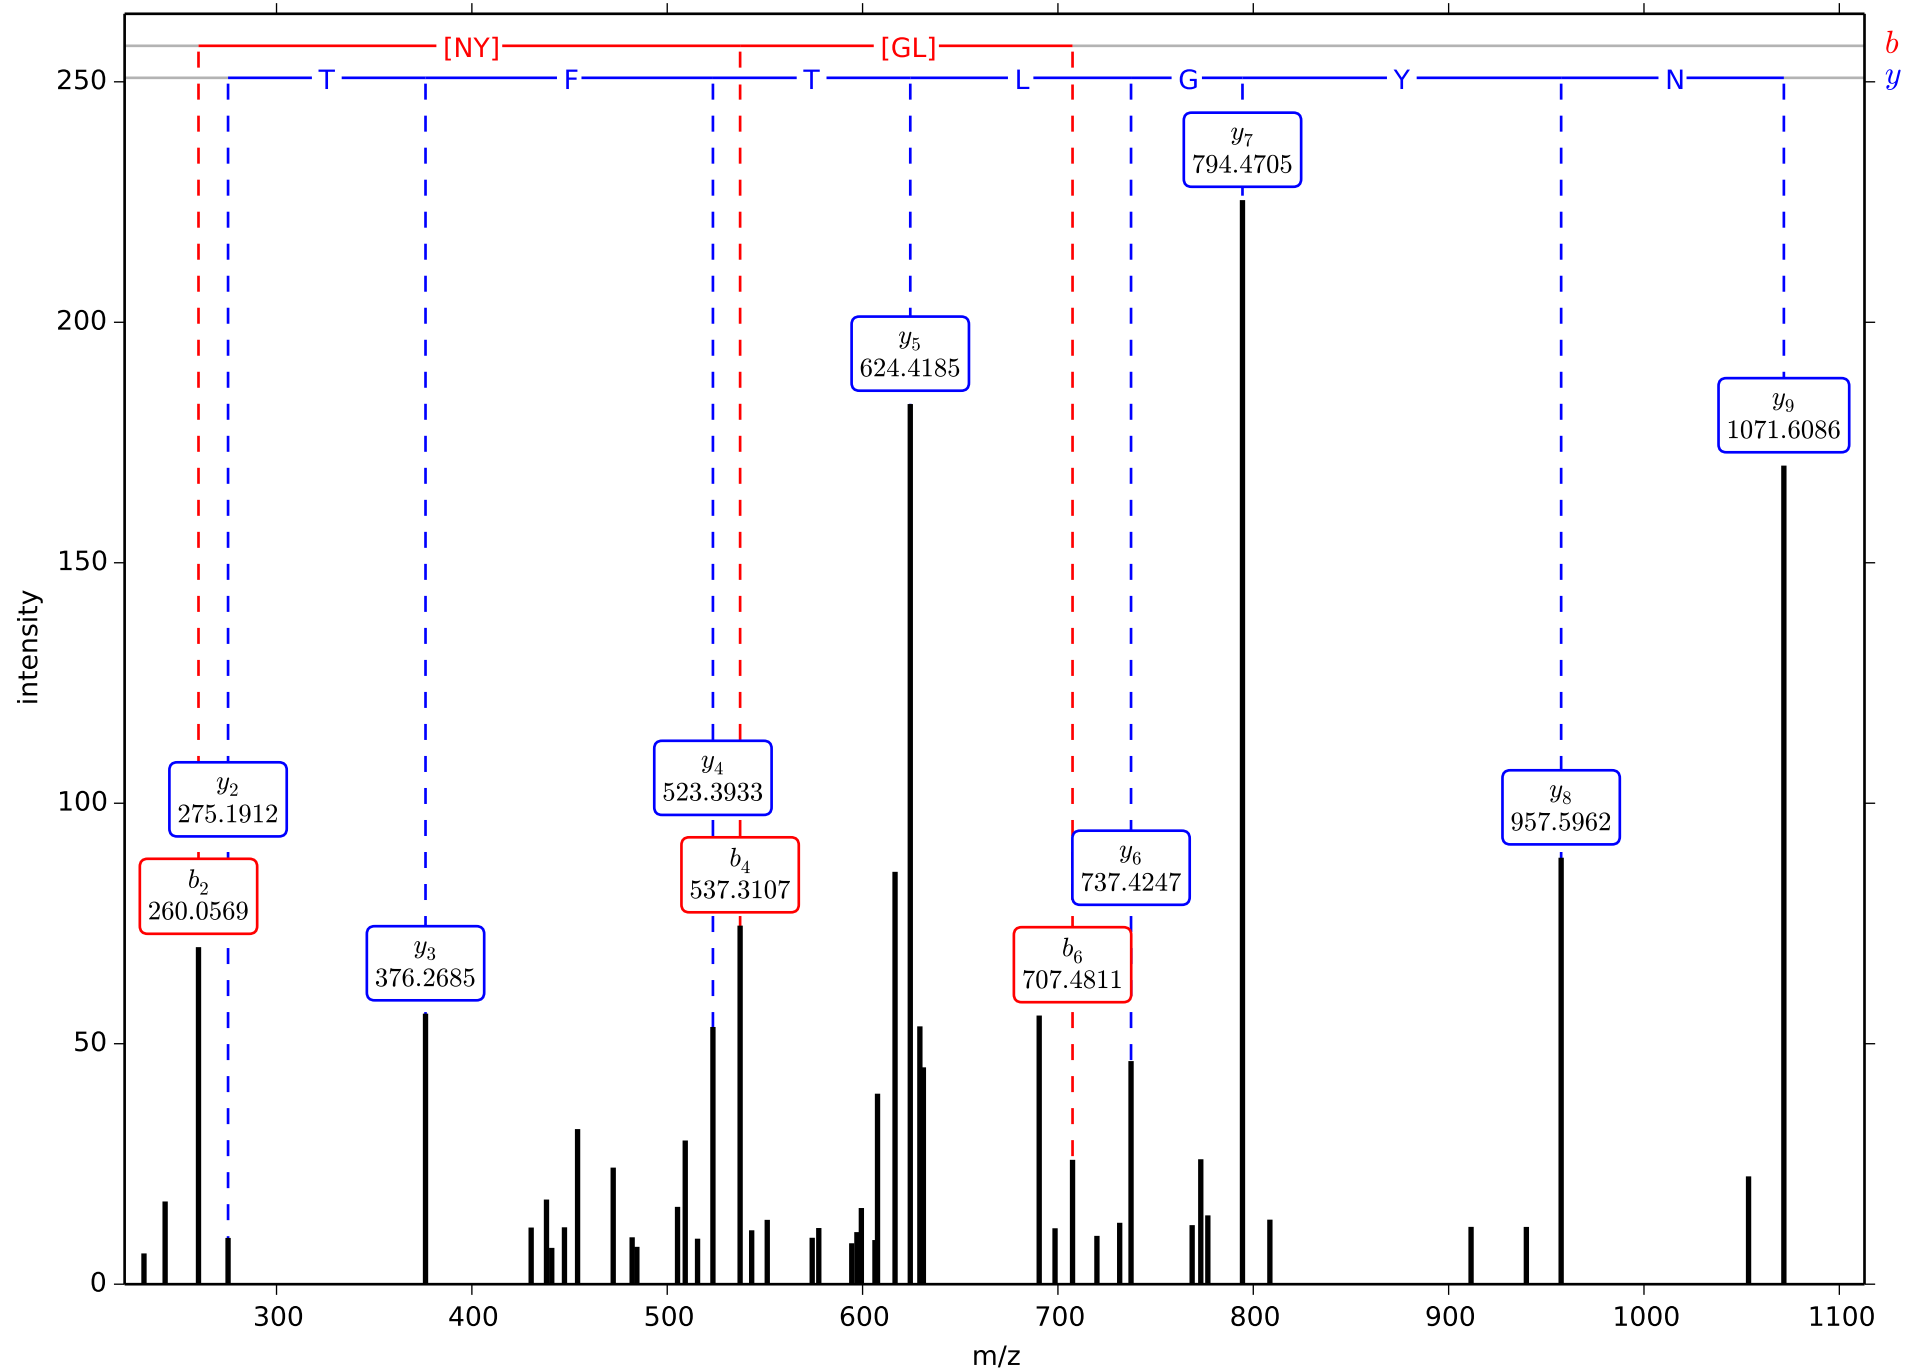

Q60931 : YKVCNYGLTFTQK

parent: 811.405150,2+

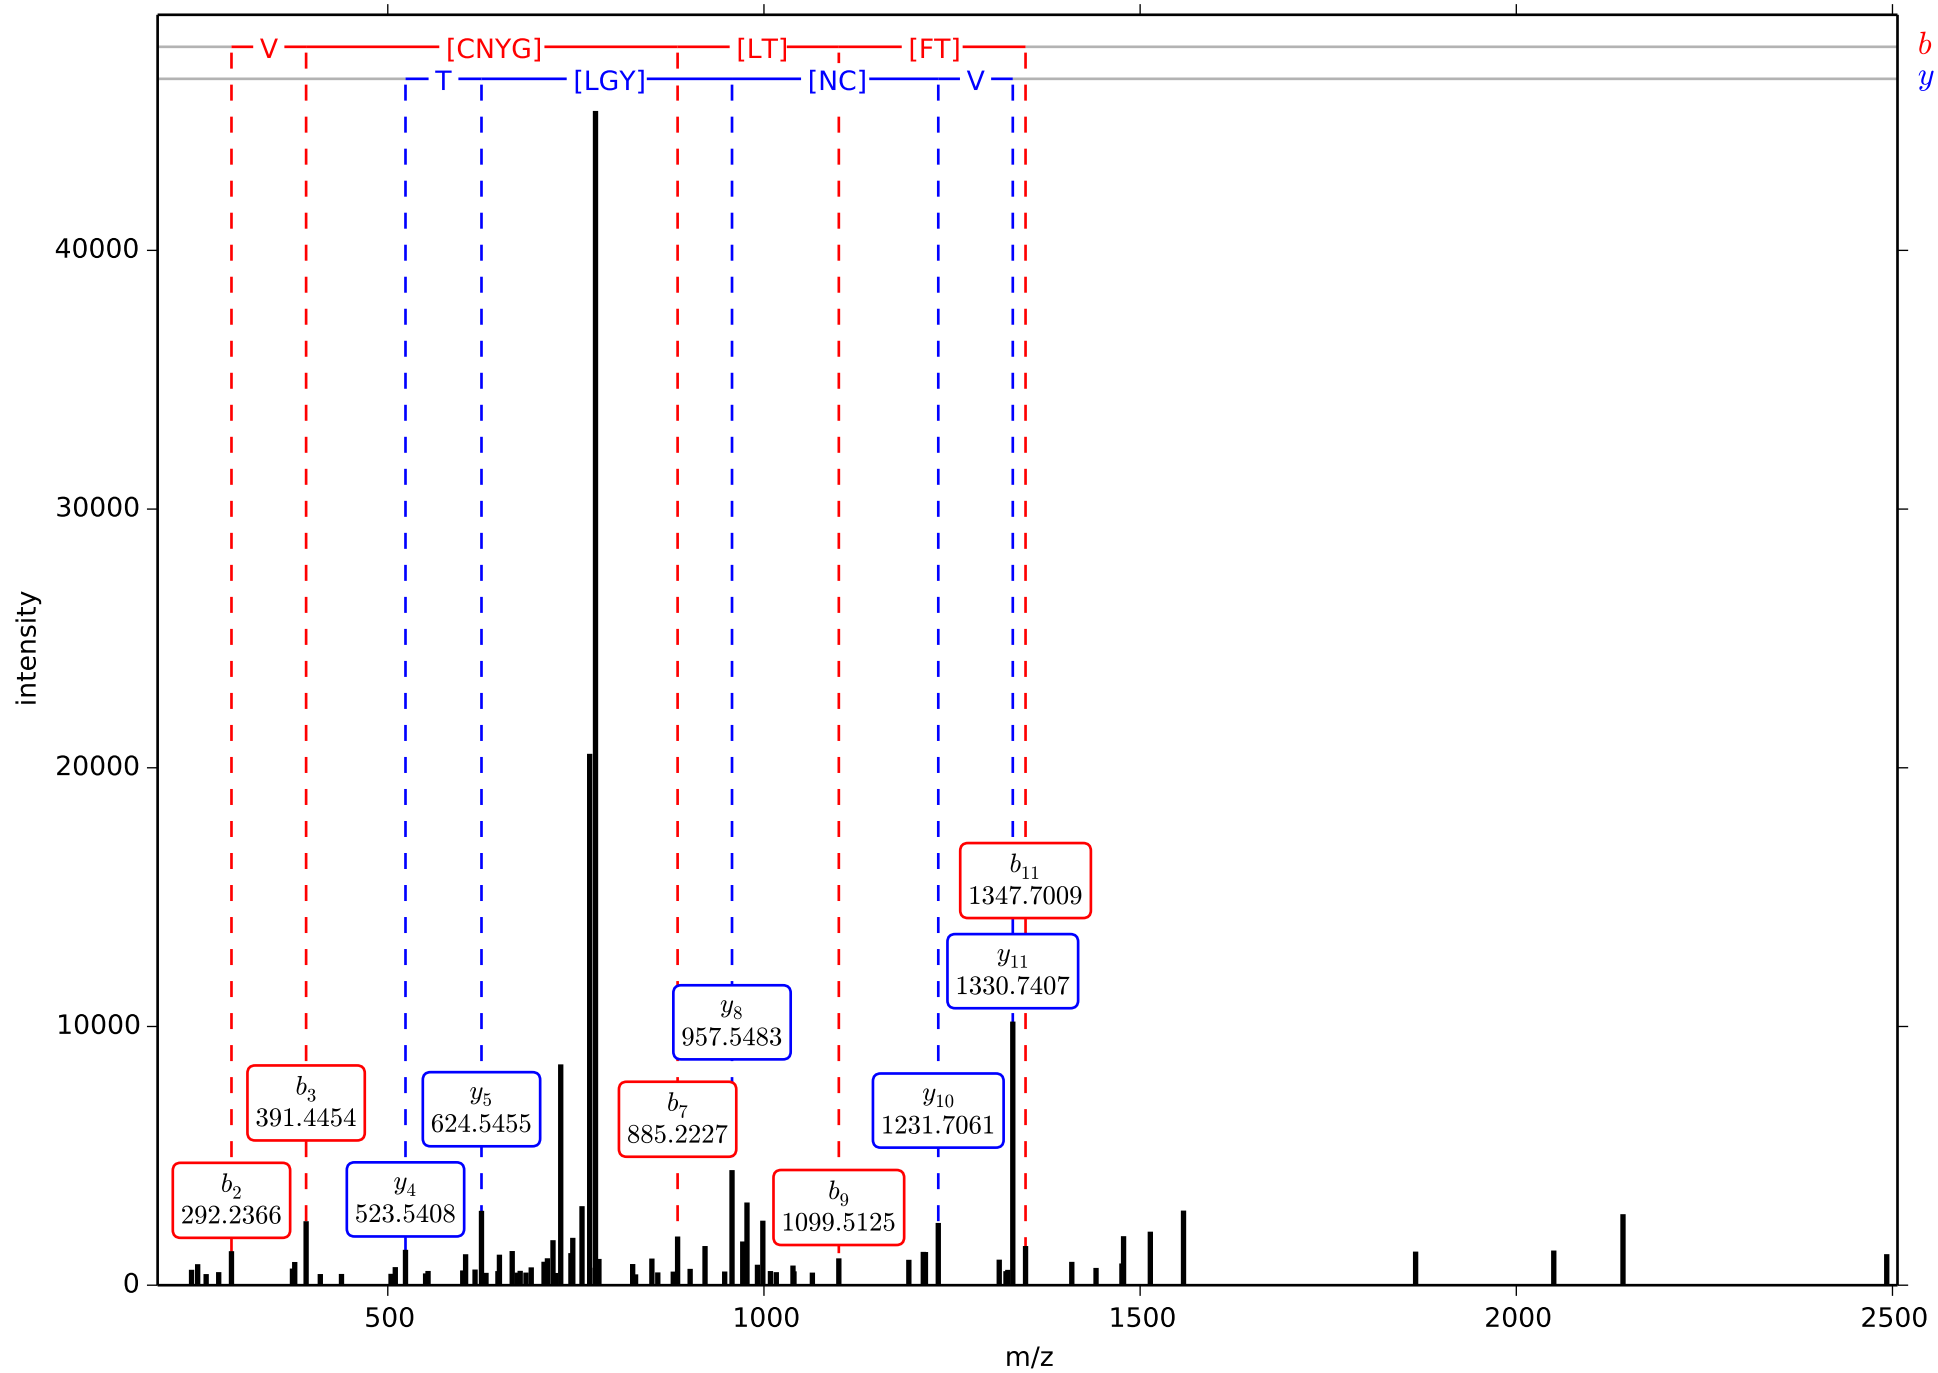

O70161 : ITVQVEPVCVGVGVVVK

parent: 840.981610,2+

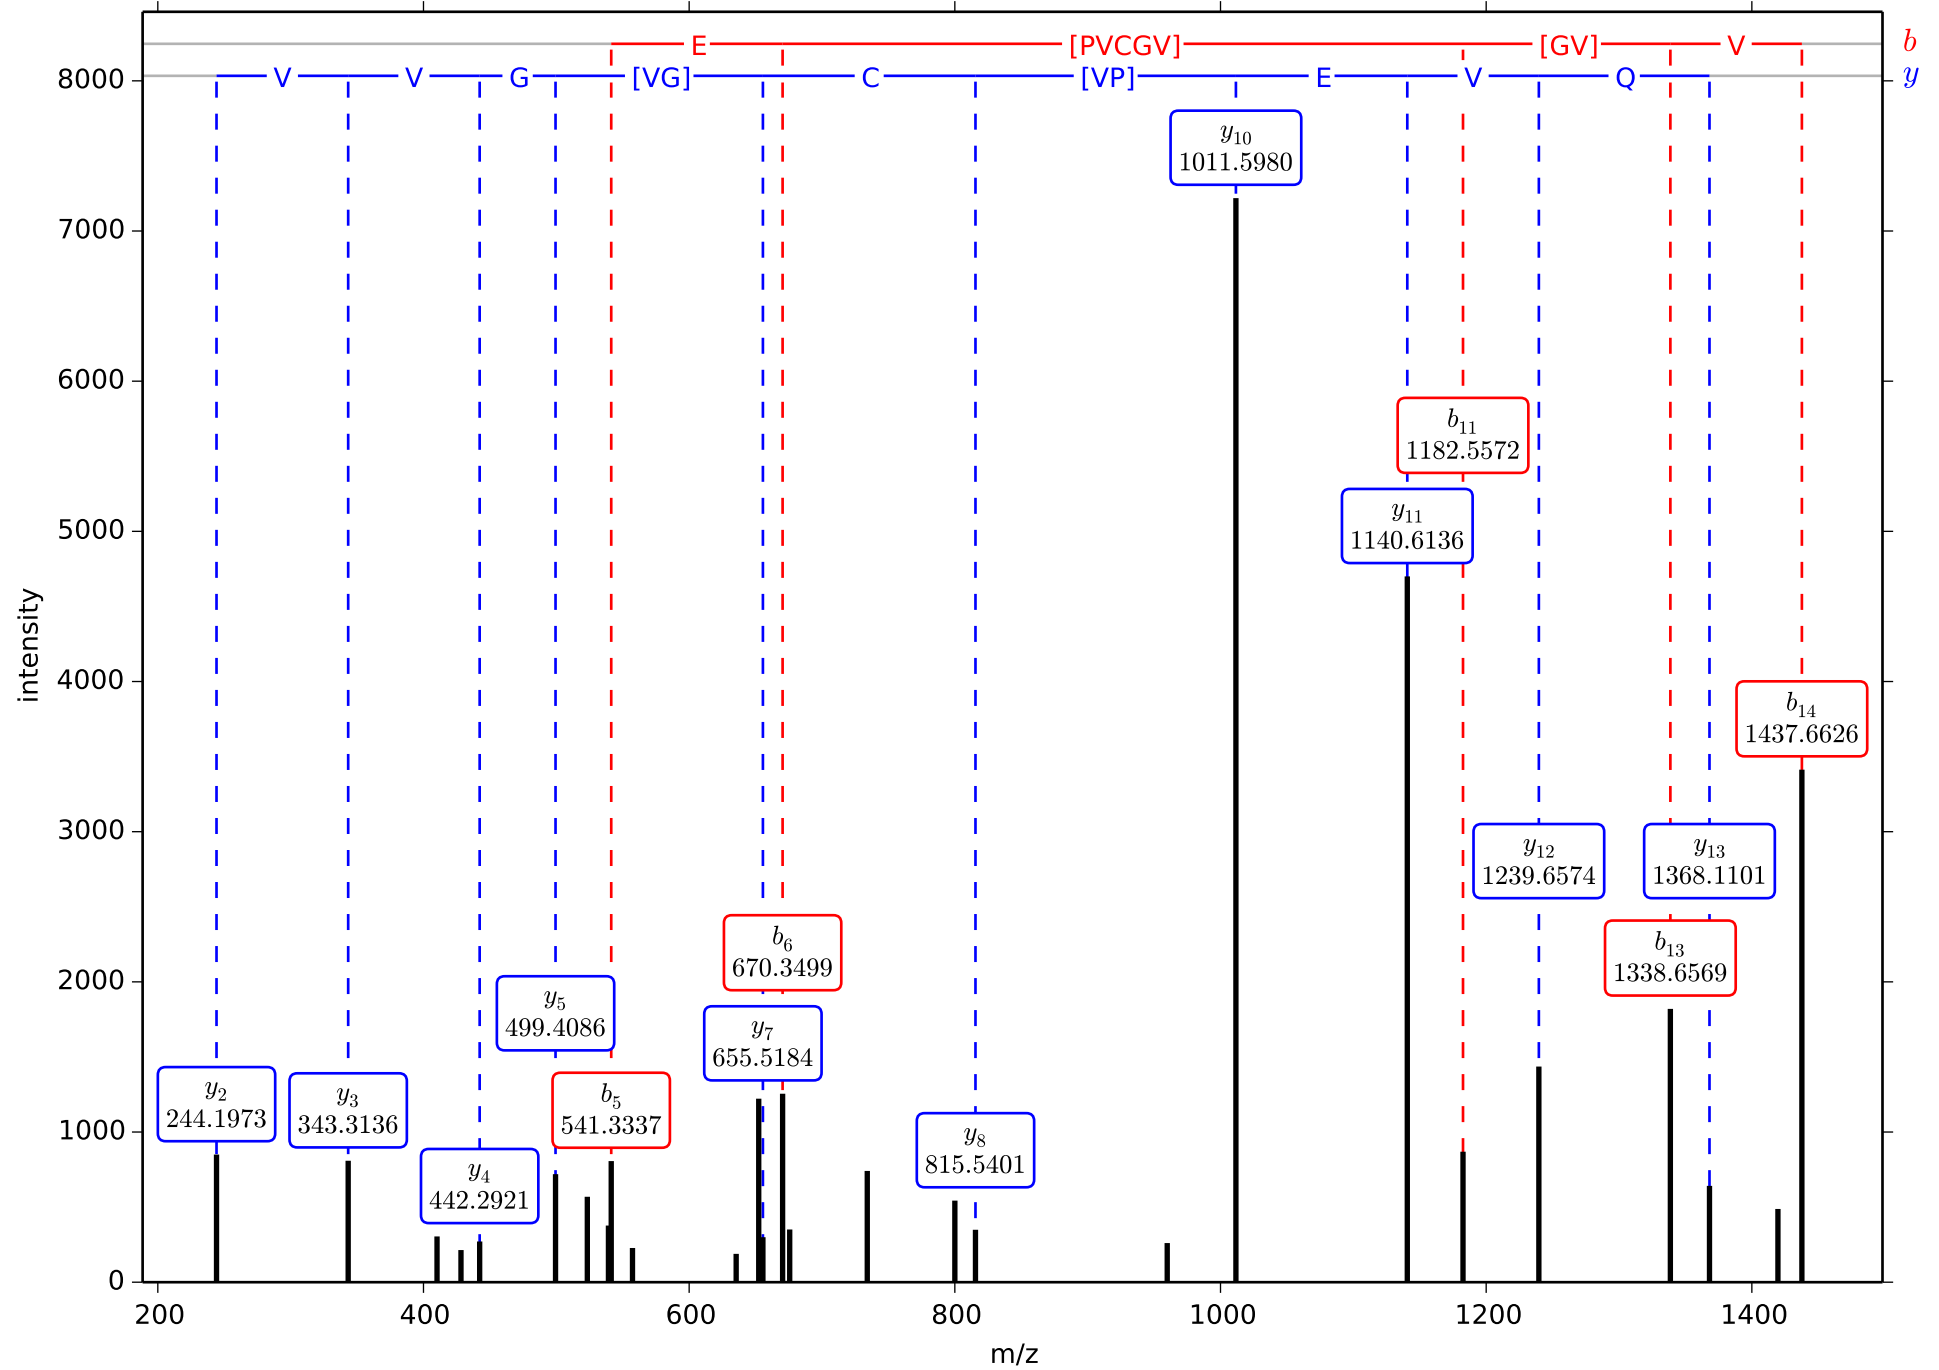

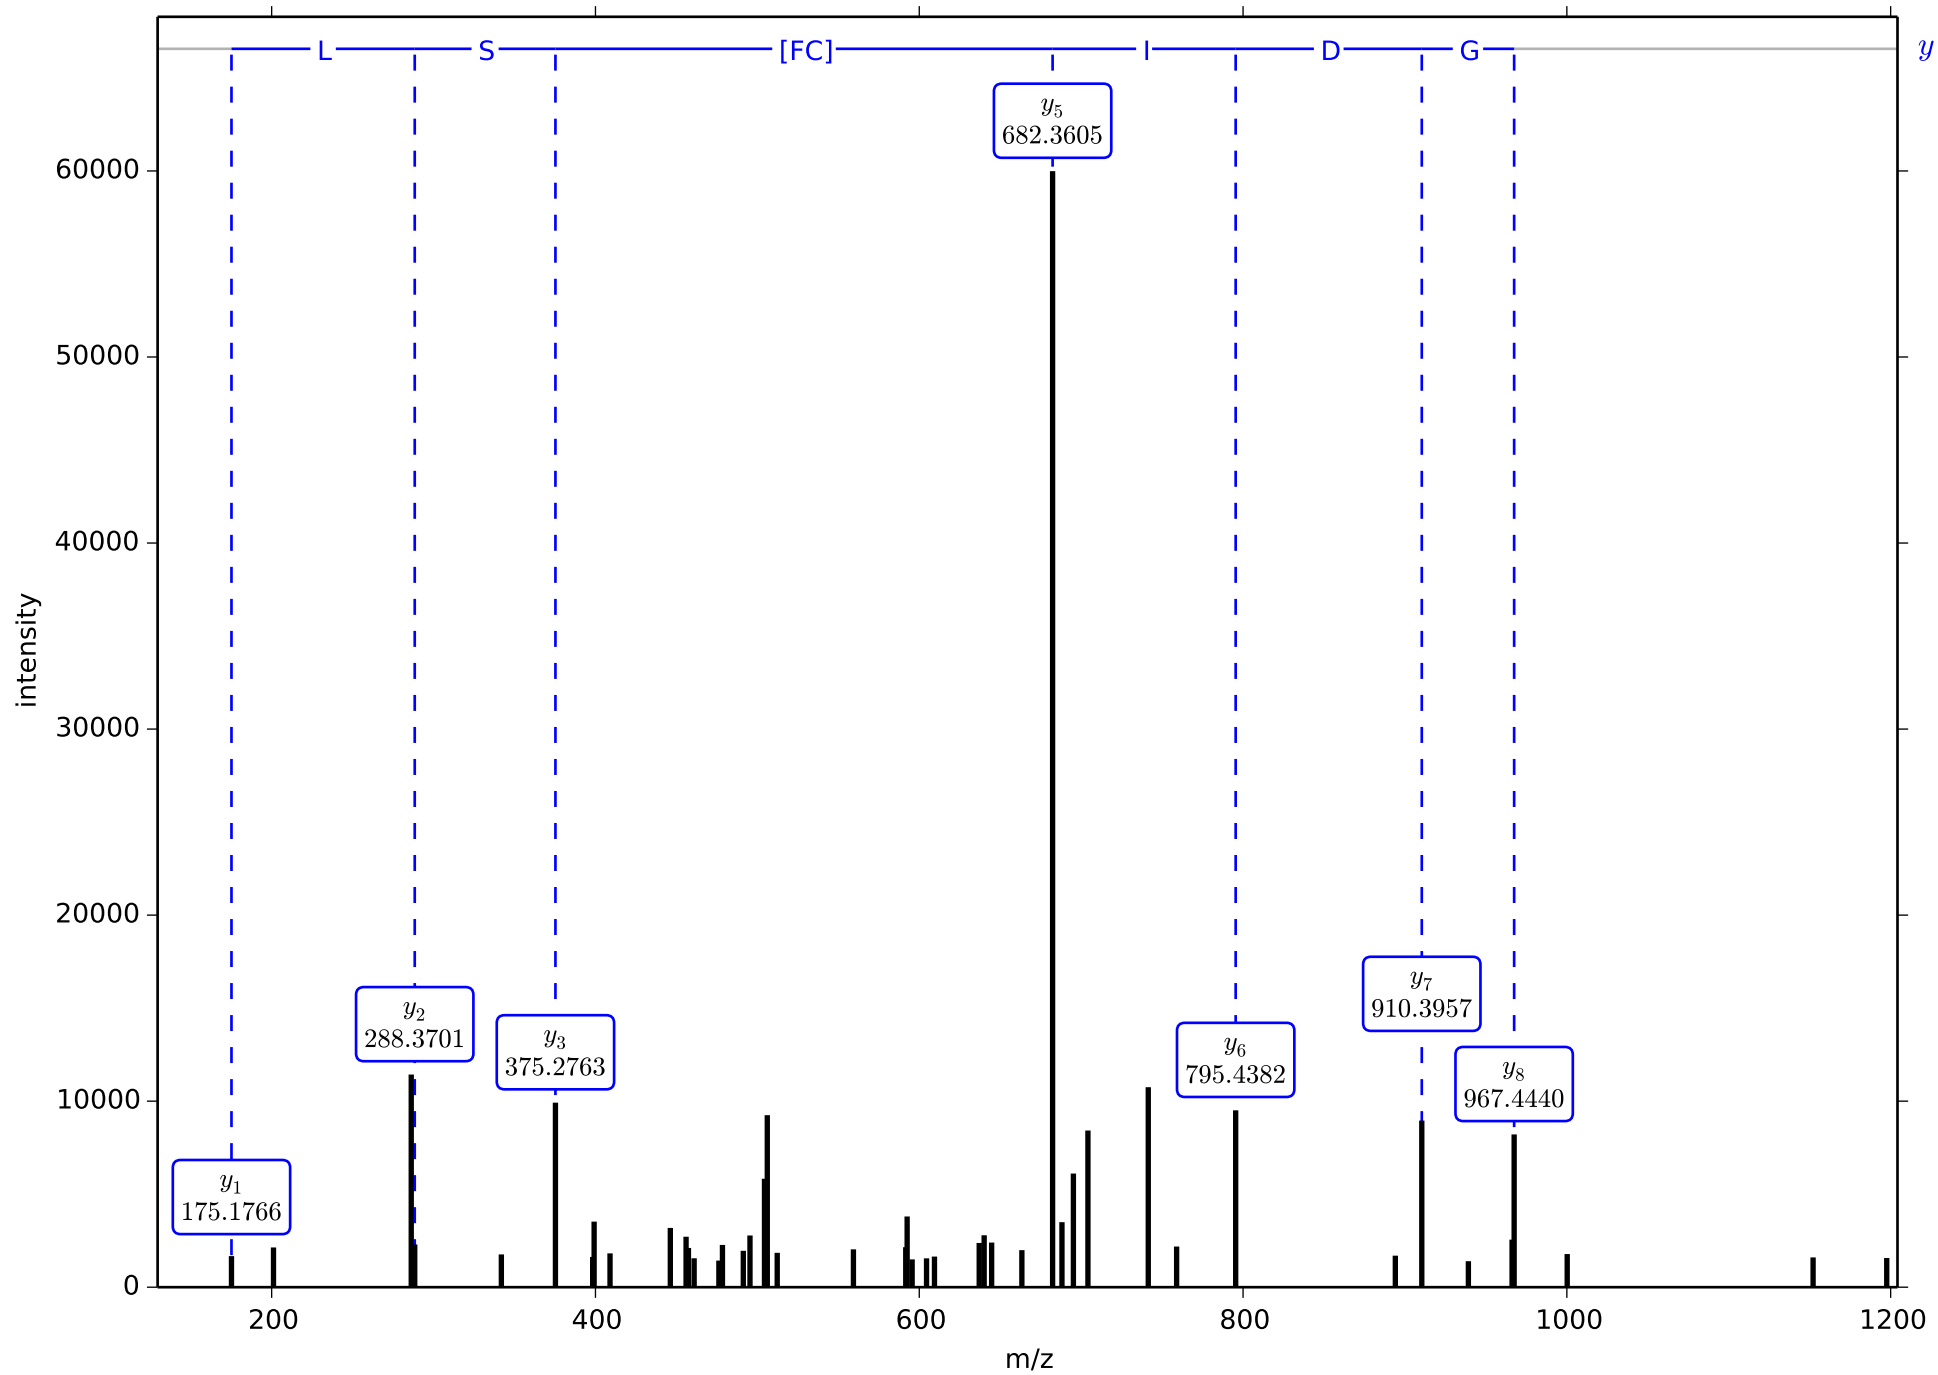

Q8QZT1 : QATLGAGLPSTPCTTVNK

parent: 965.025700,2+

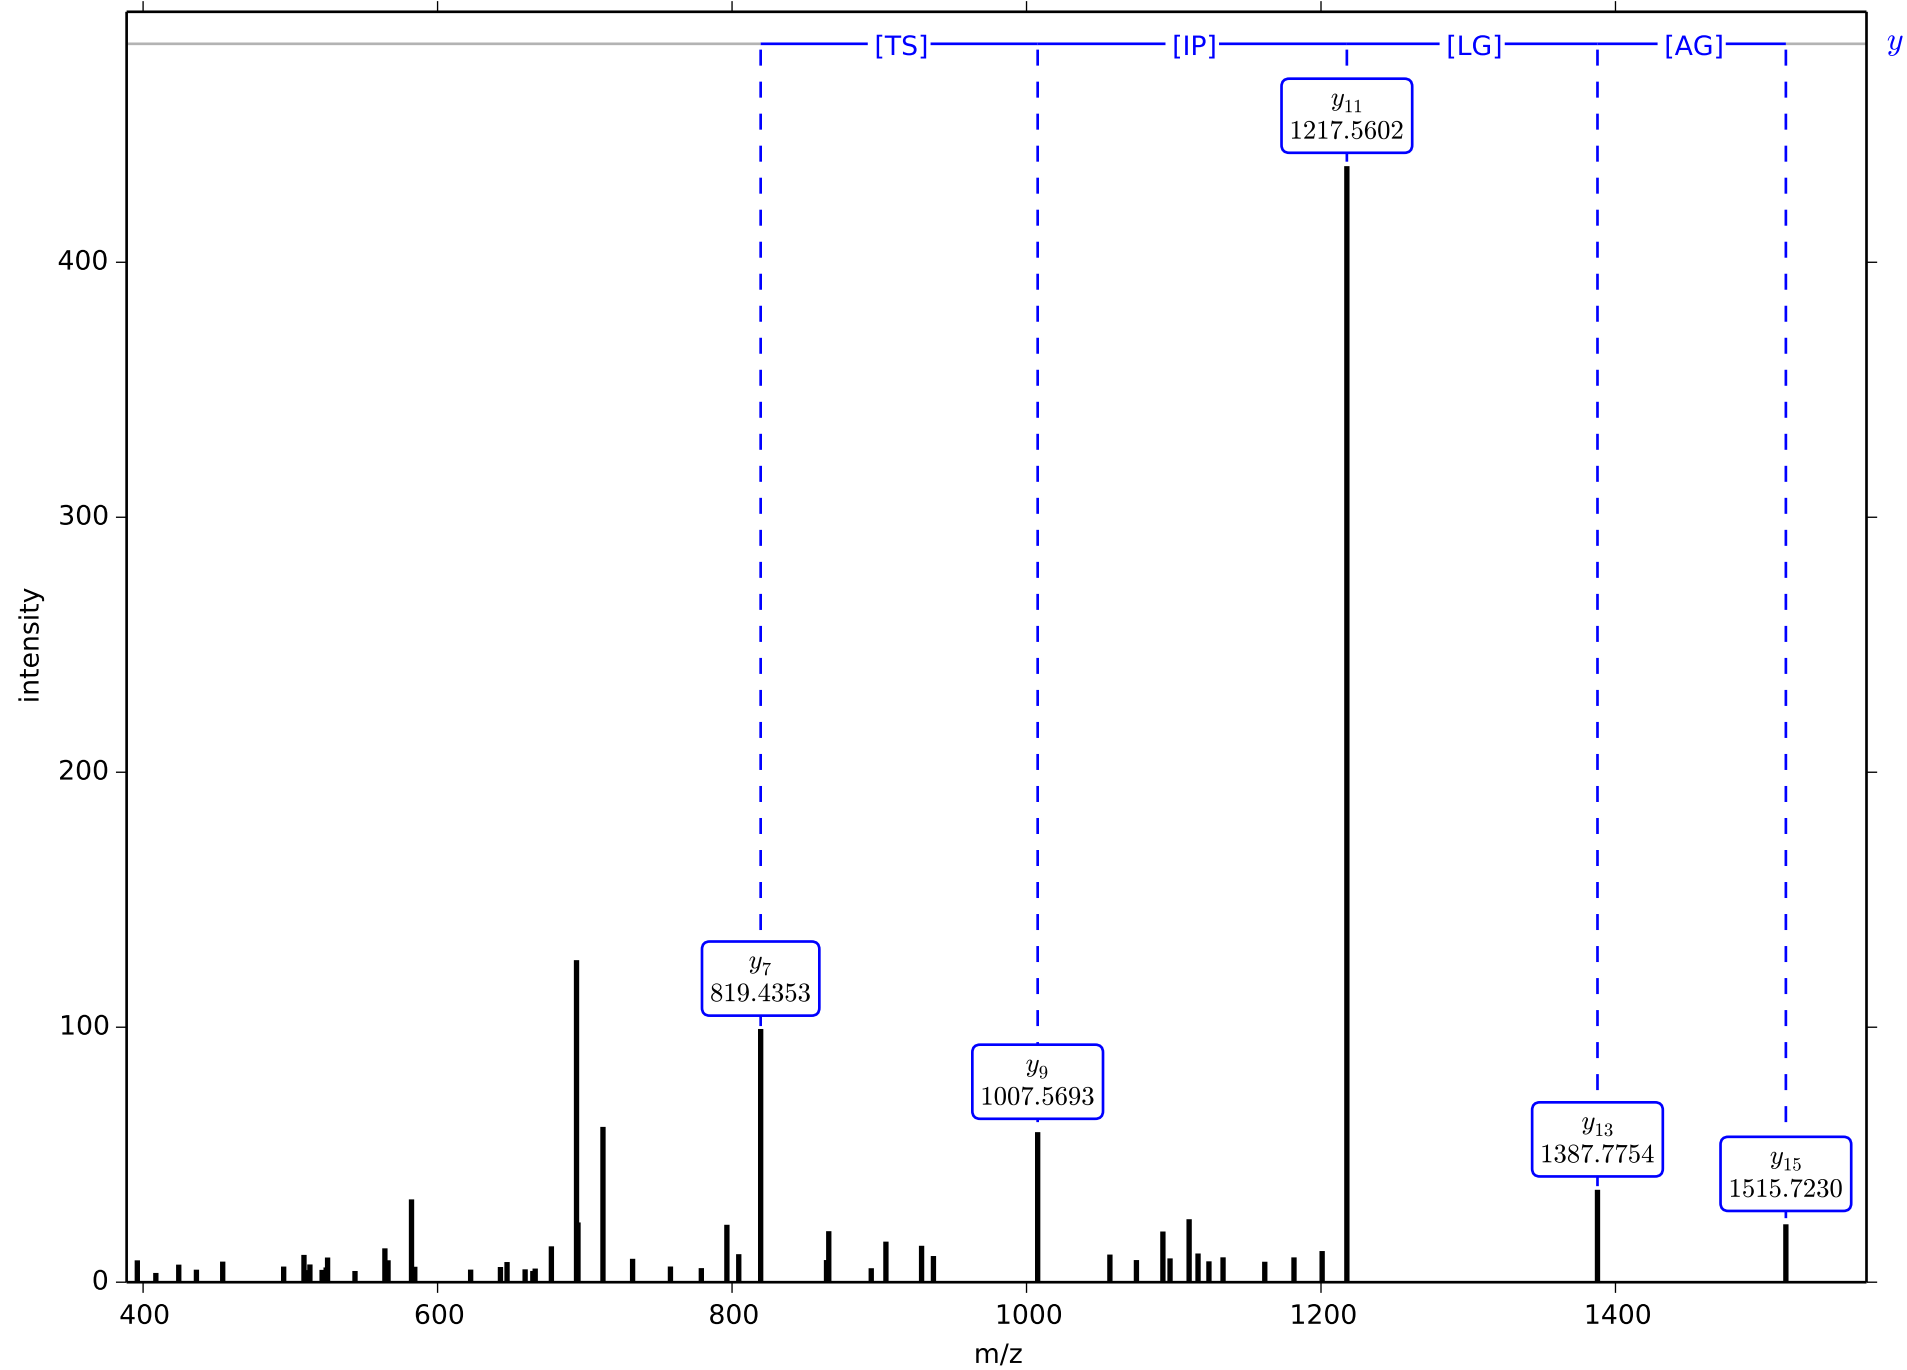



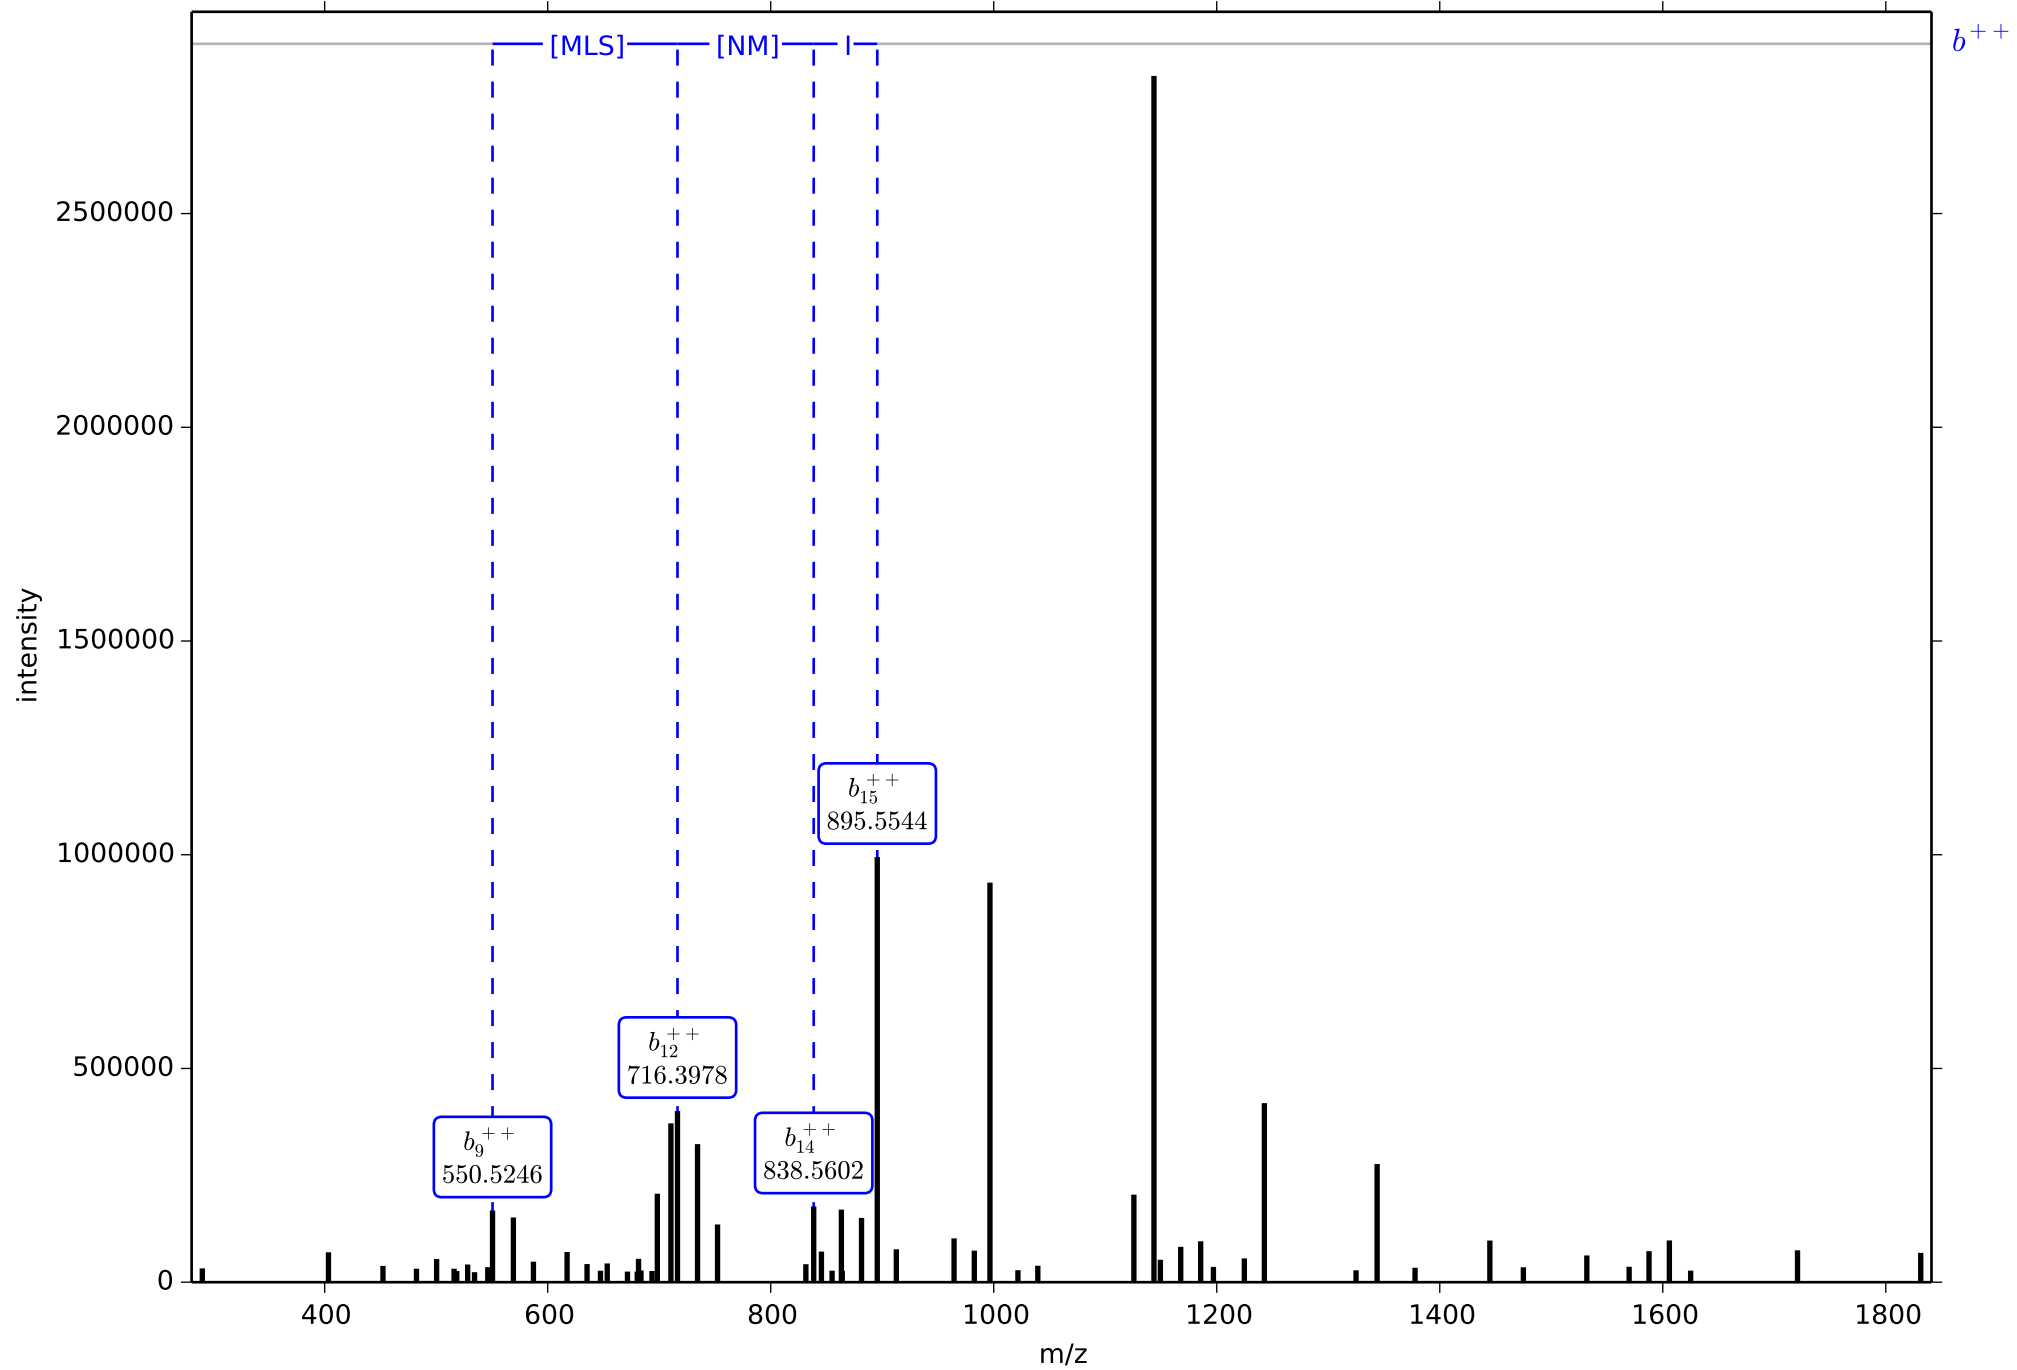

P14094 : YNPNVLPVQCTGK

parent: 745.376930,2+

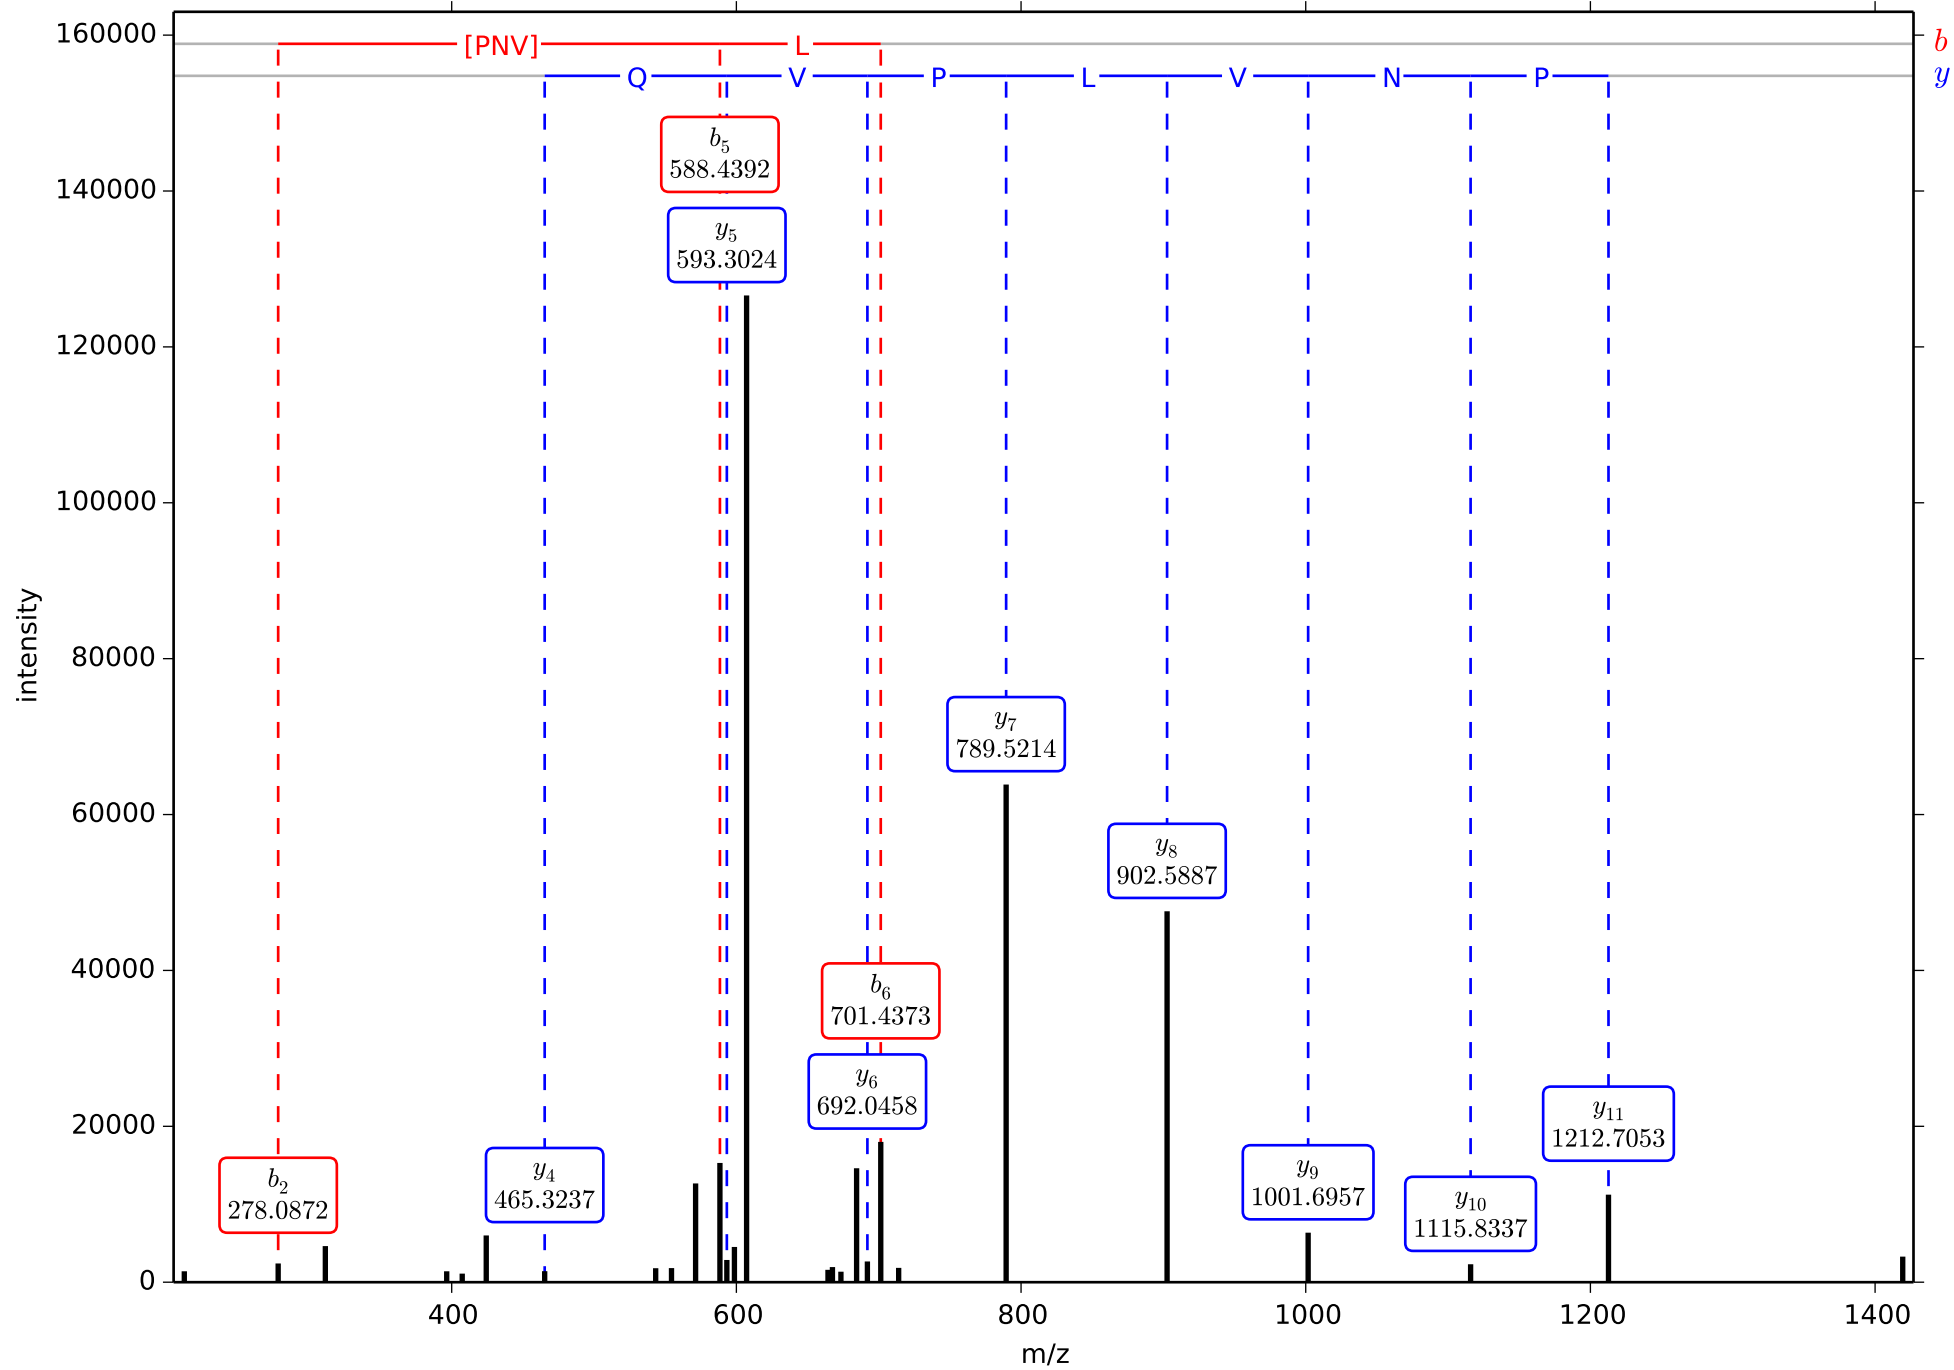

P14094 : YNPNVLPVQCTGKR

parent: 823.440820,2+

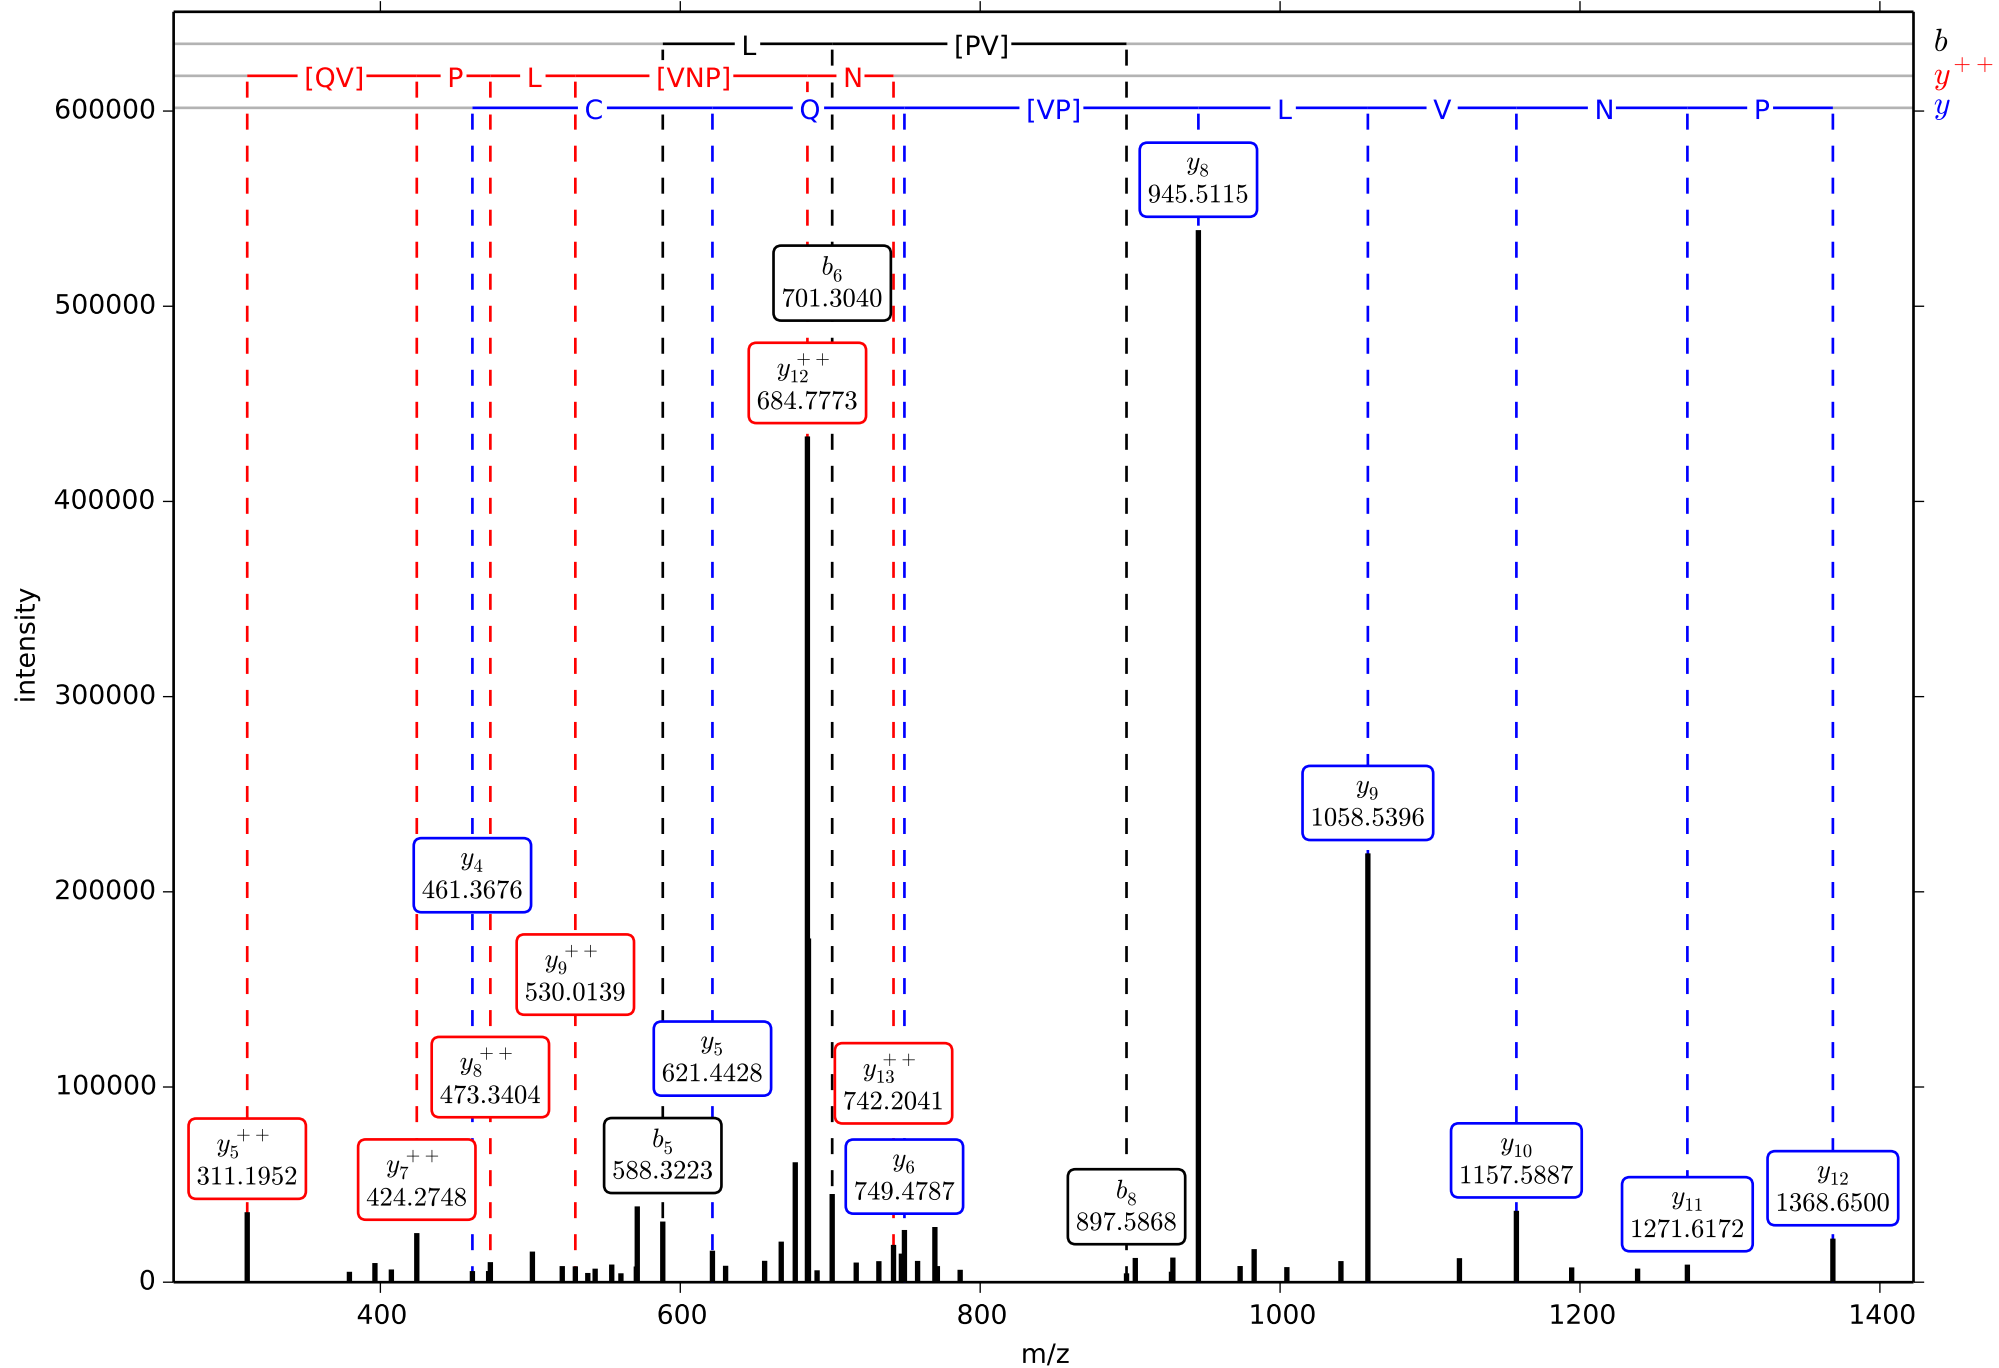

O08599 : AAHVFFTDSCPDALFNLVK

parent: 1141.080600,2+

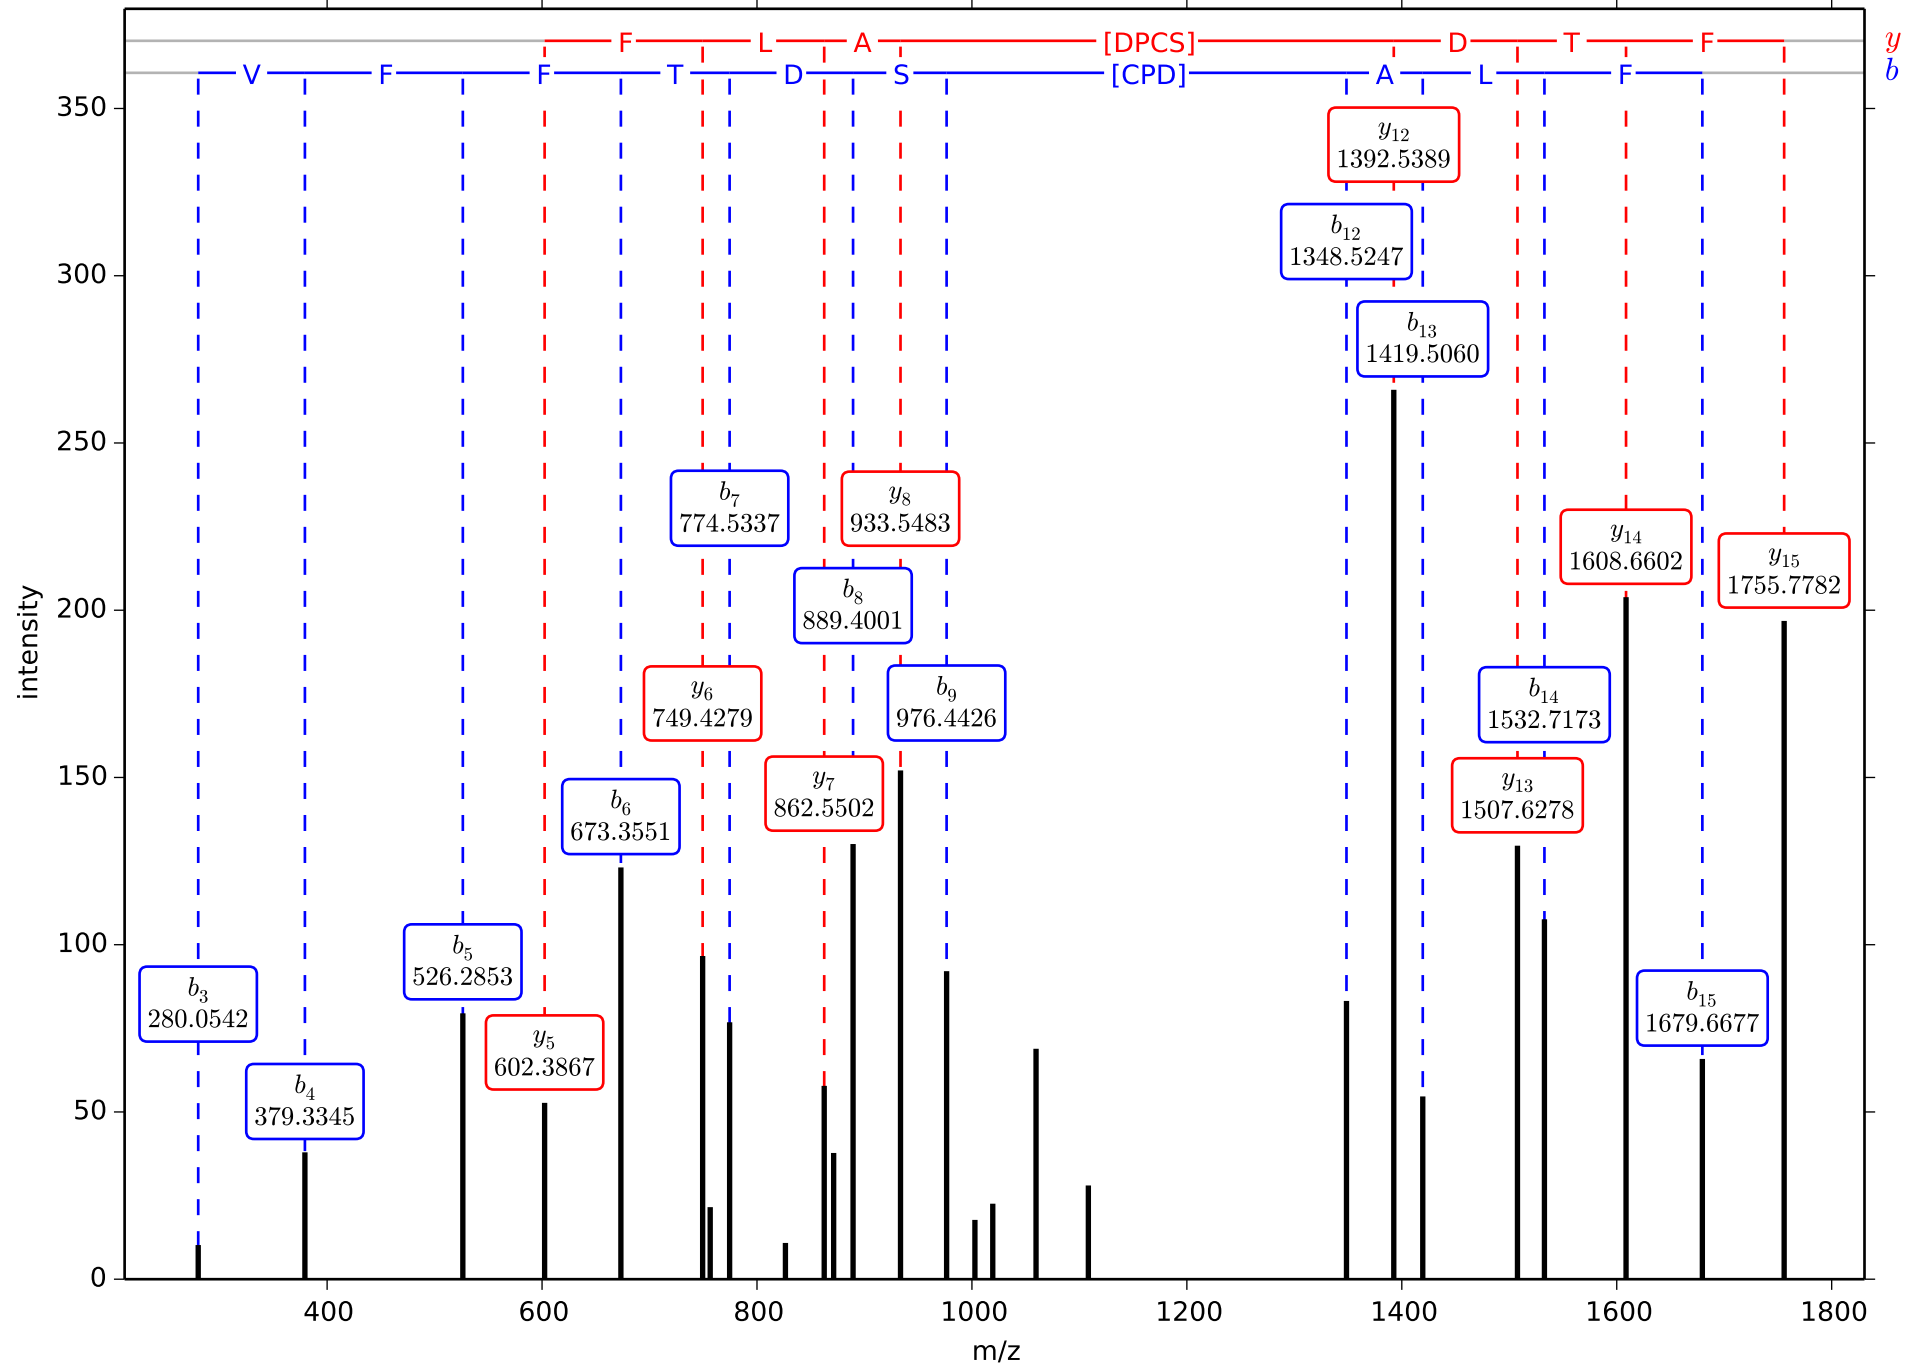

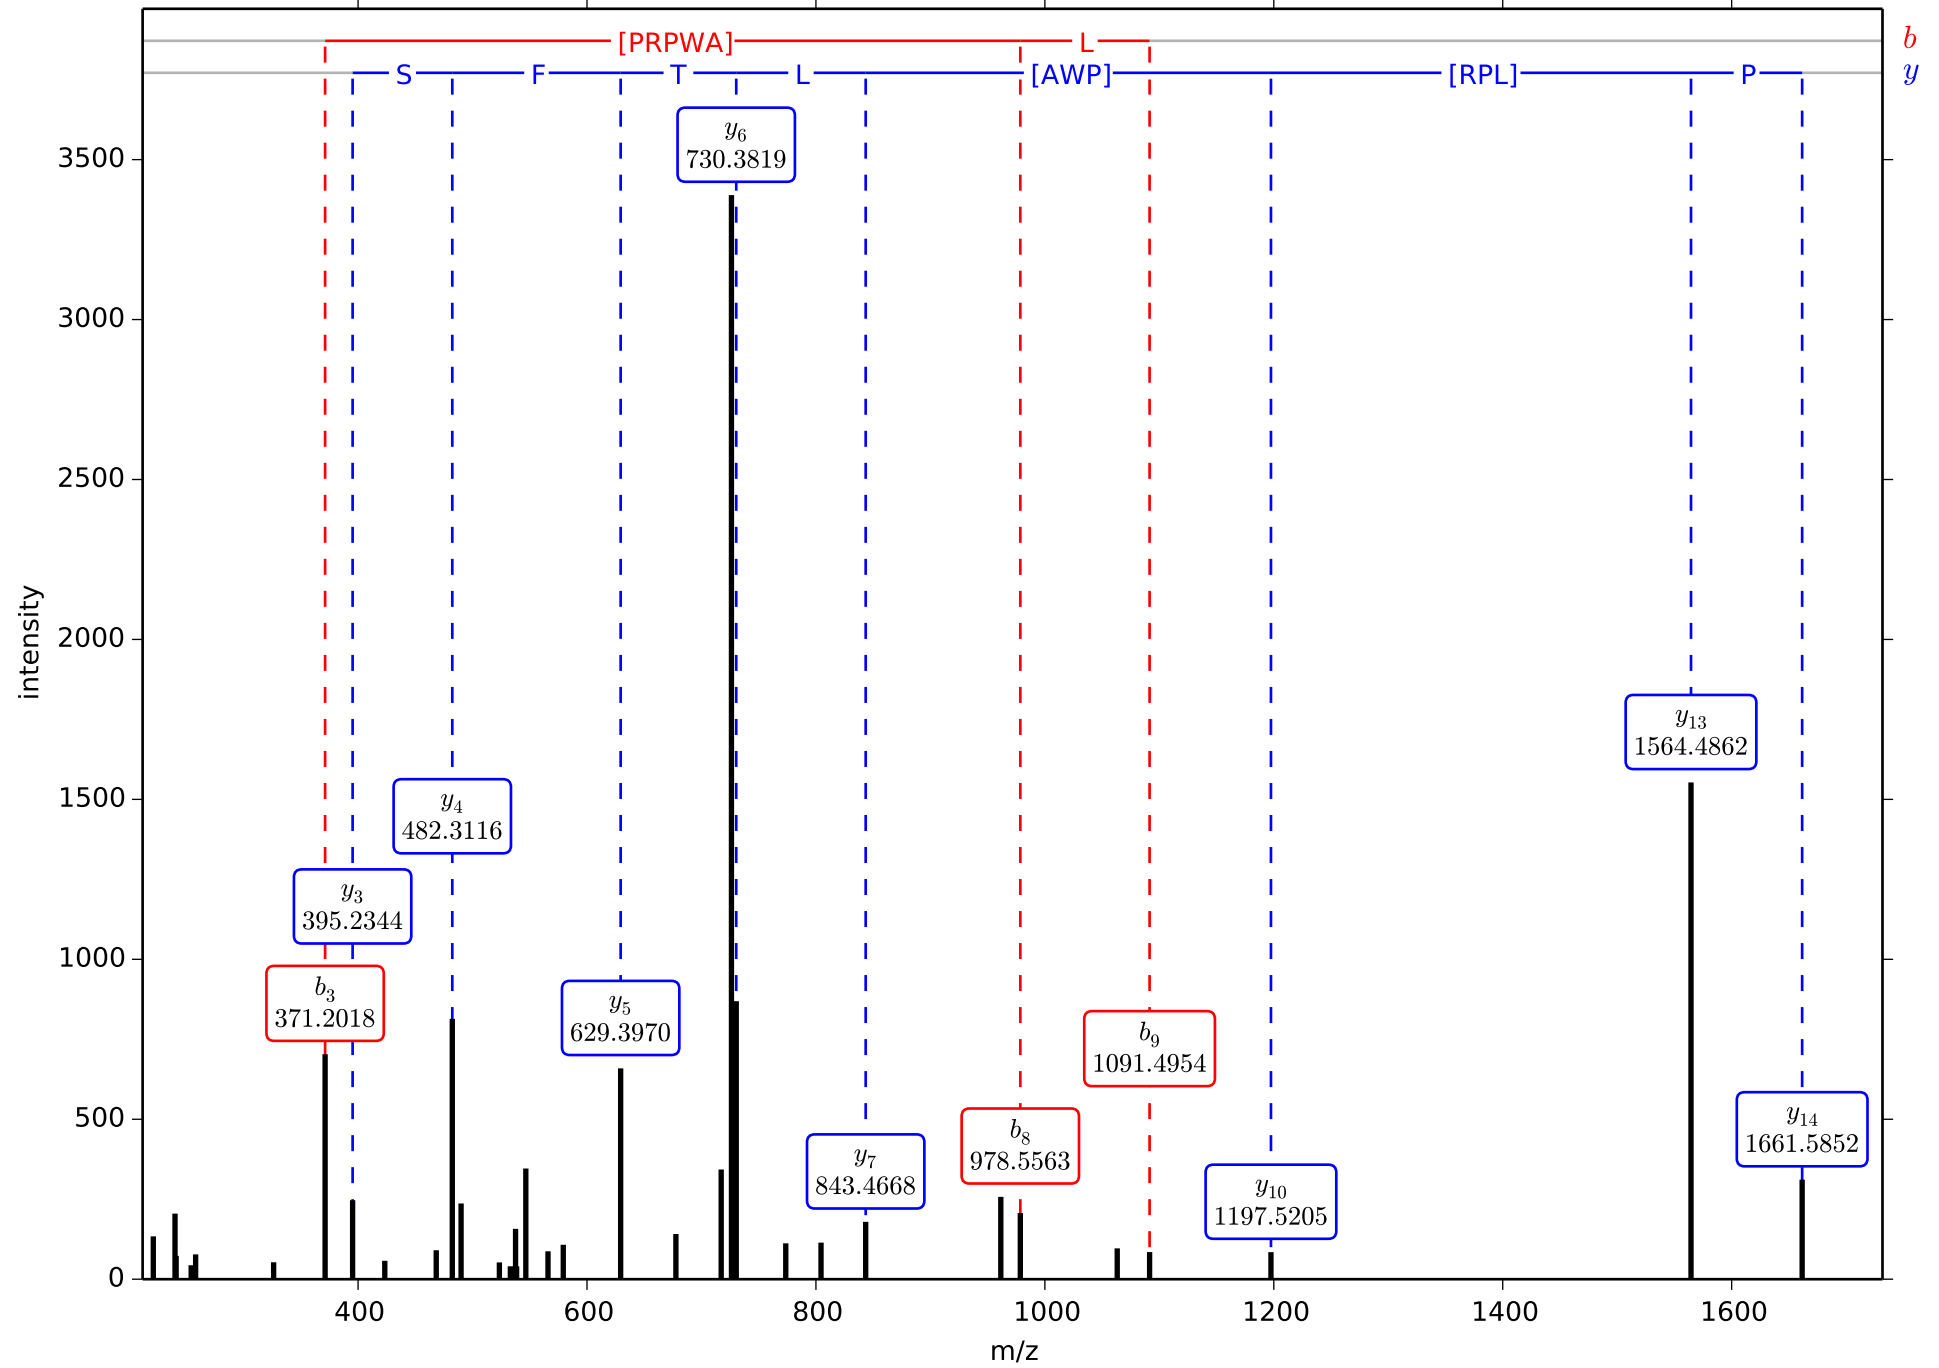

Q9D6F9 : EIVHLQAGQCNGNQIGAK

parent: 911.974380,2+

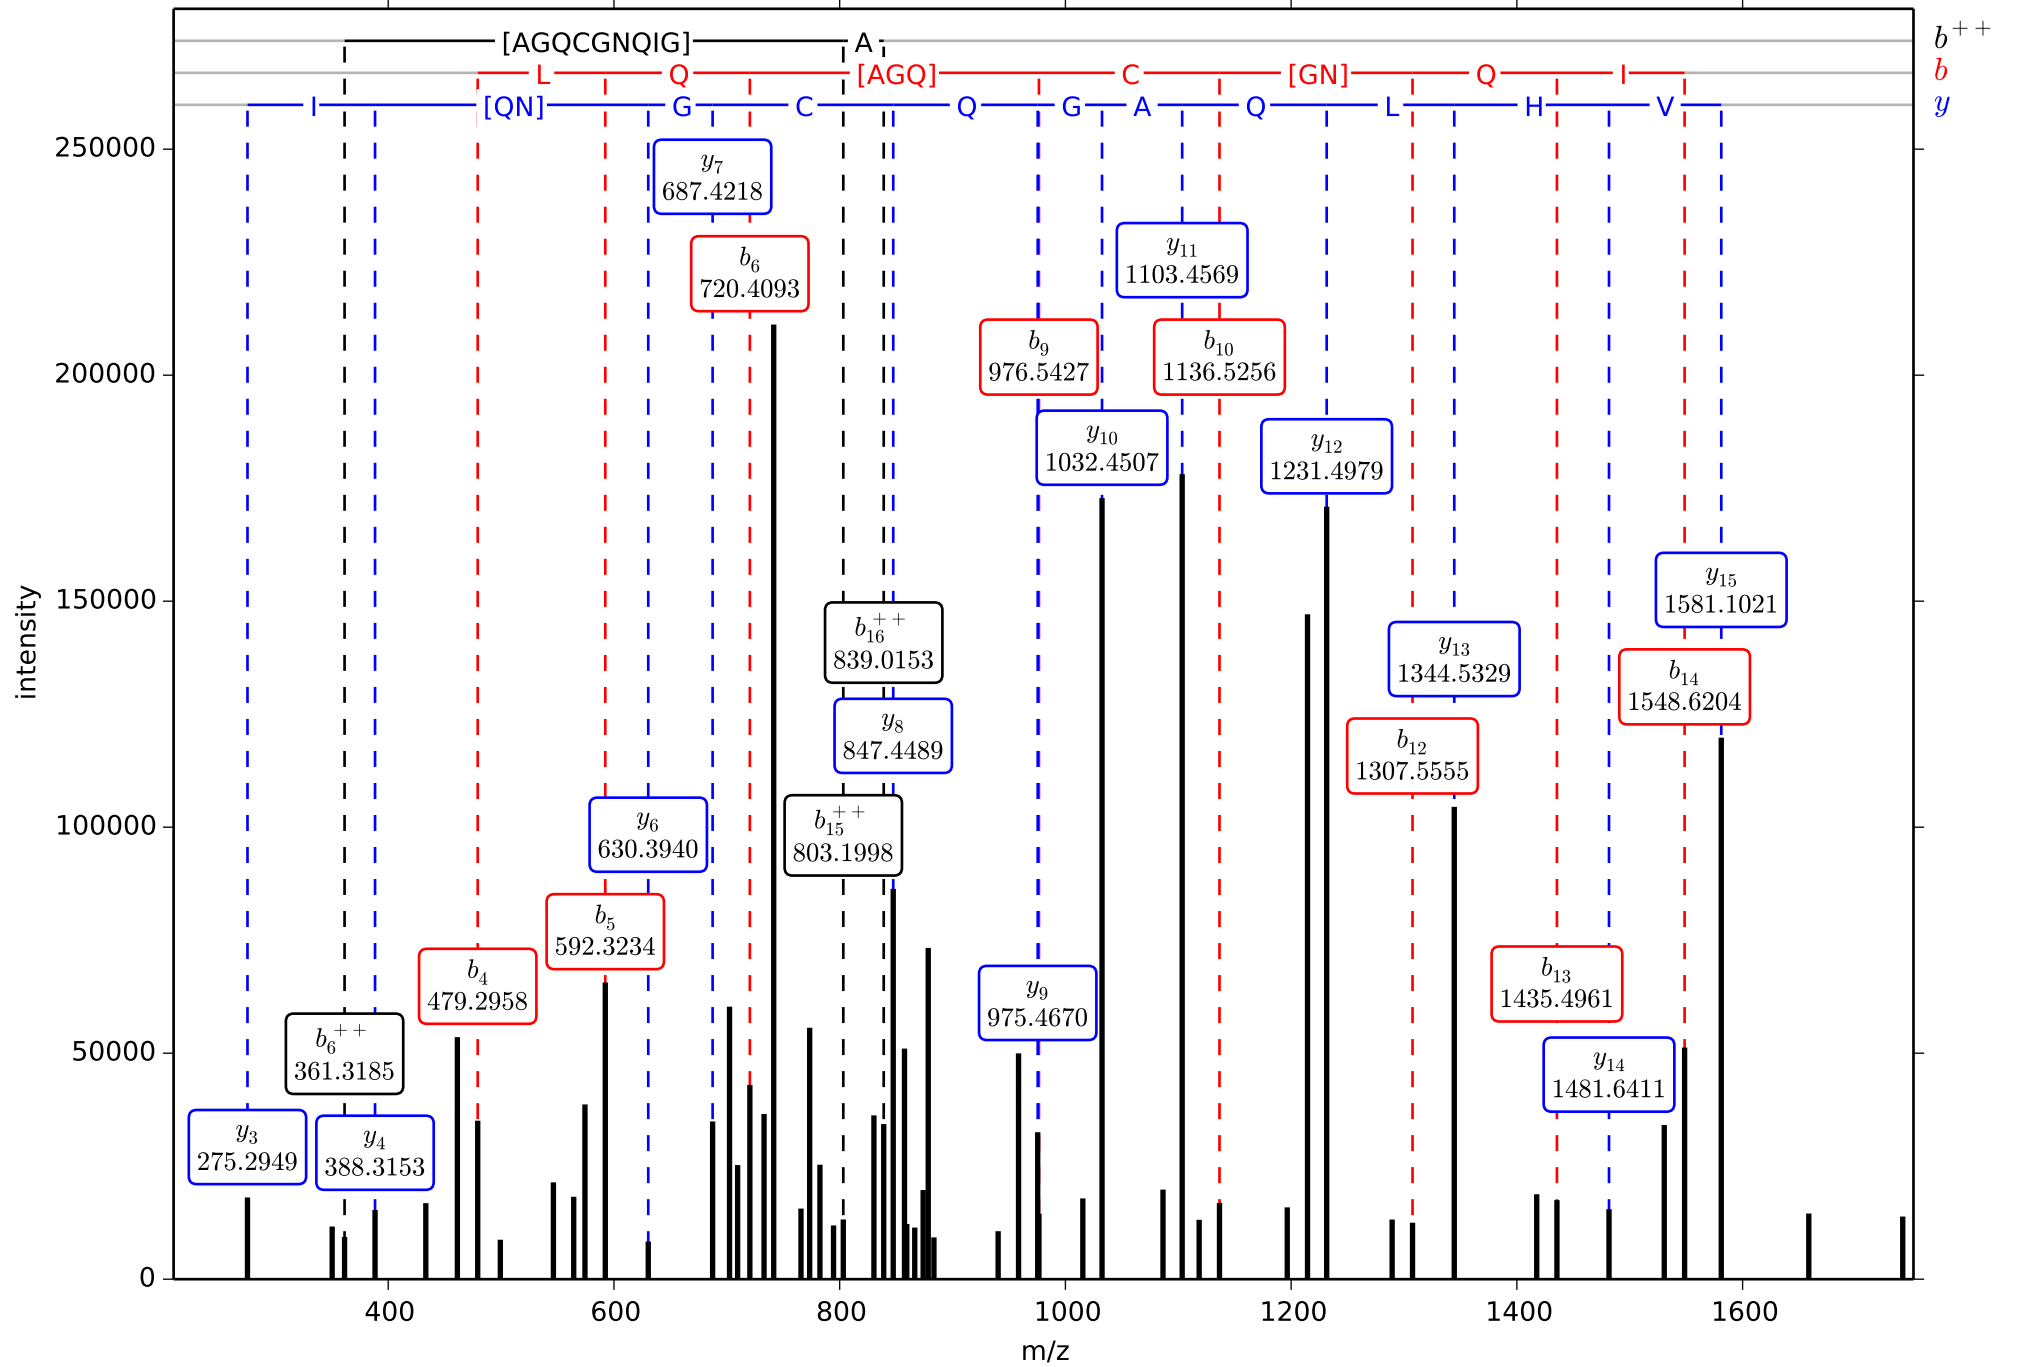

P63141 : TANCTLANTNYVNIITK

parent: 899.447440,2+

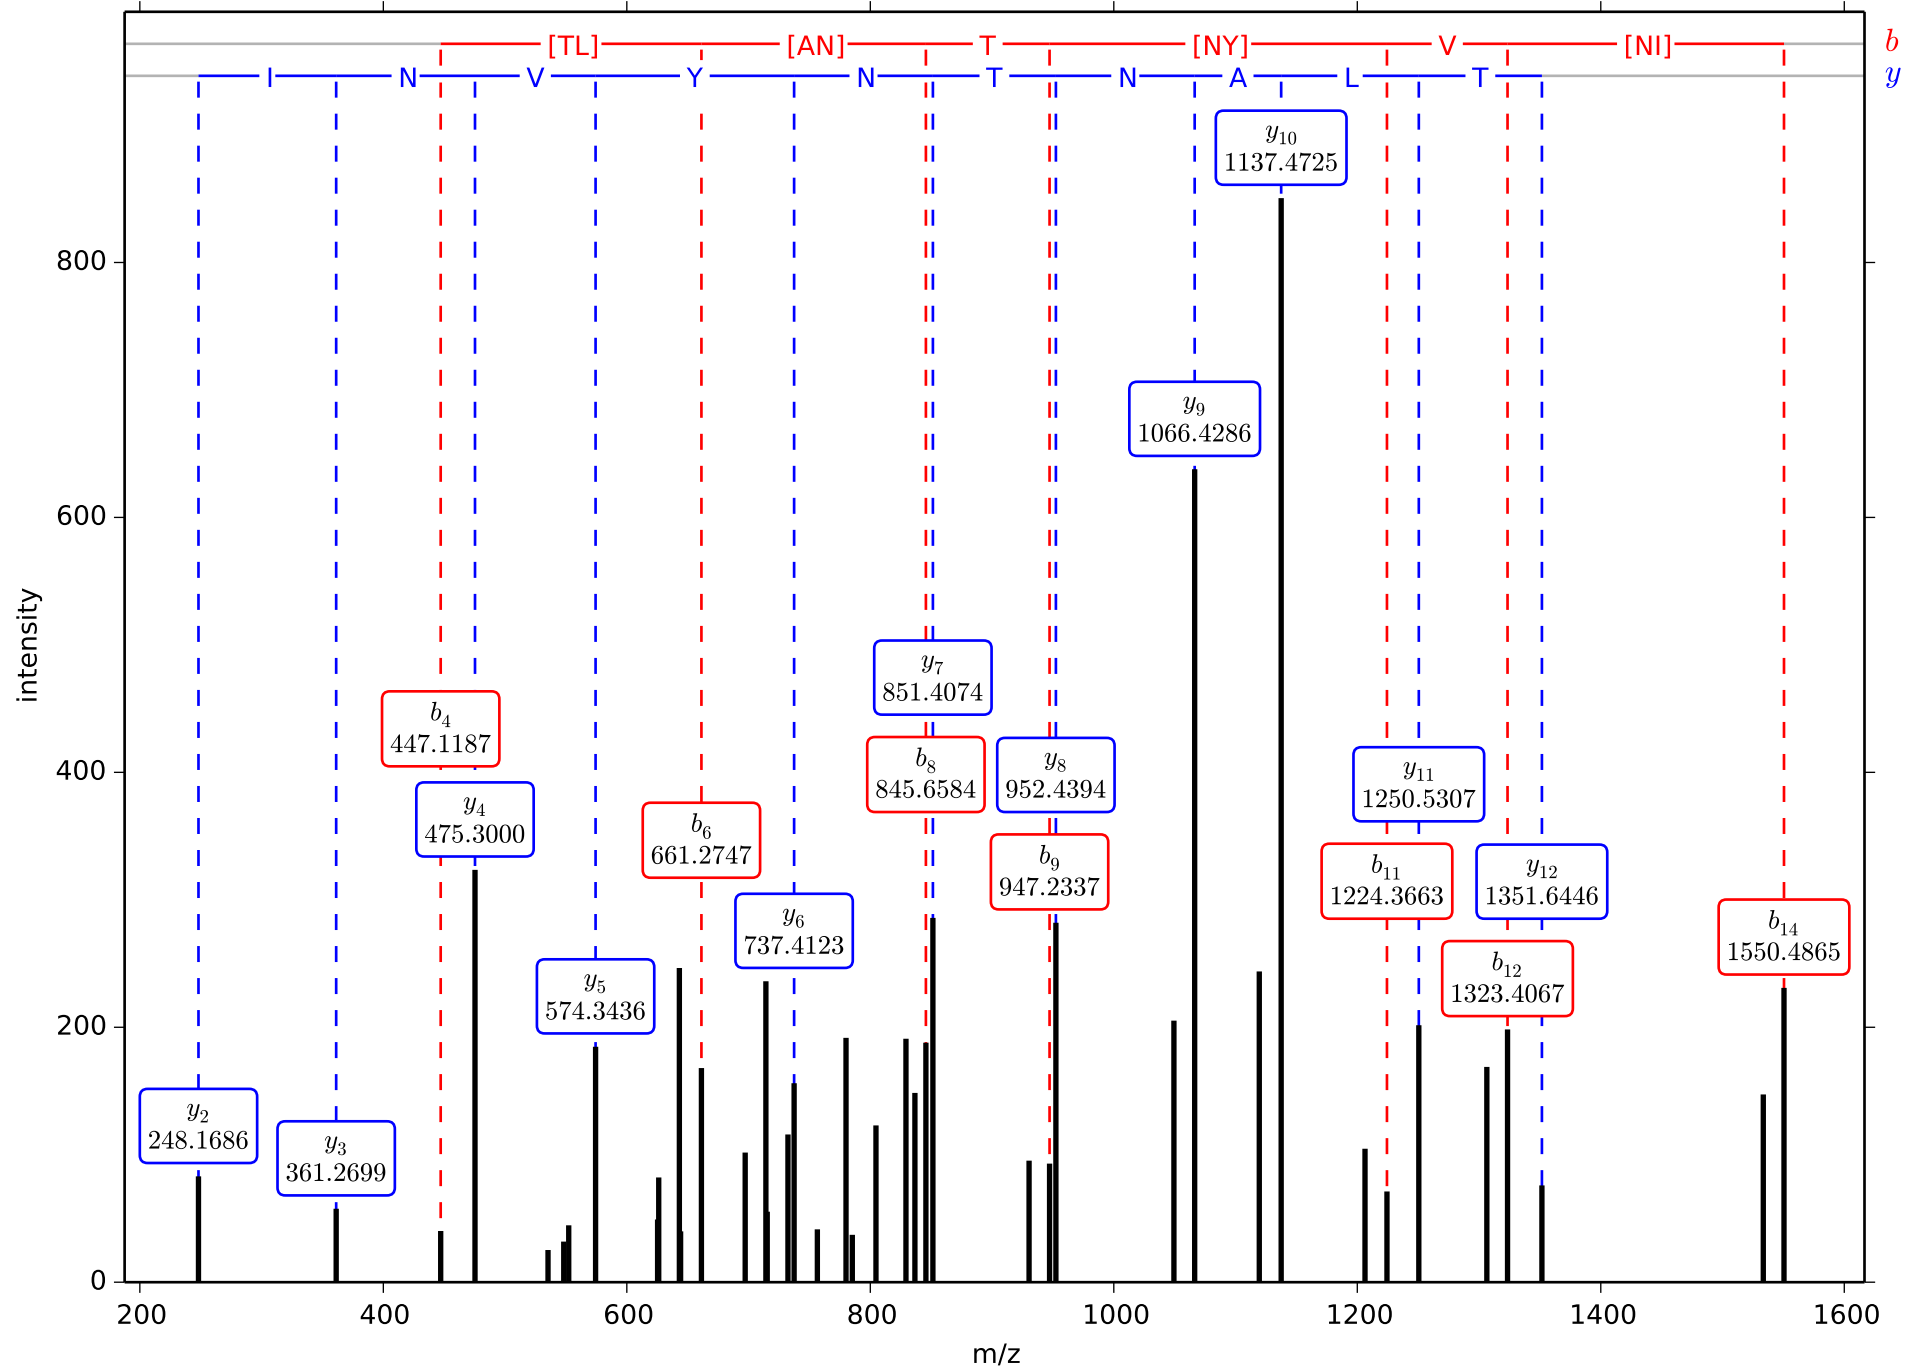

Q99JY9 : YSYVCPDLVK

parent: 622.306960,2+

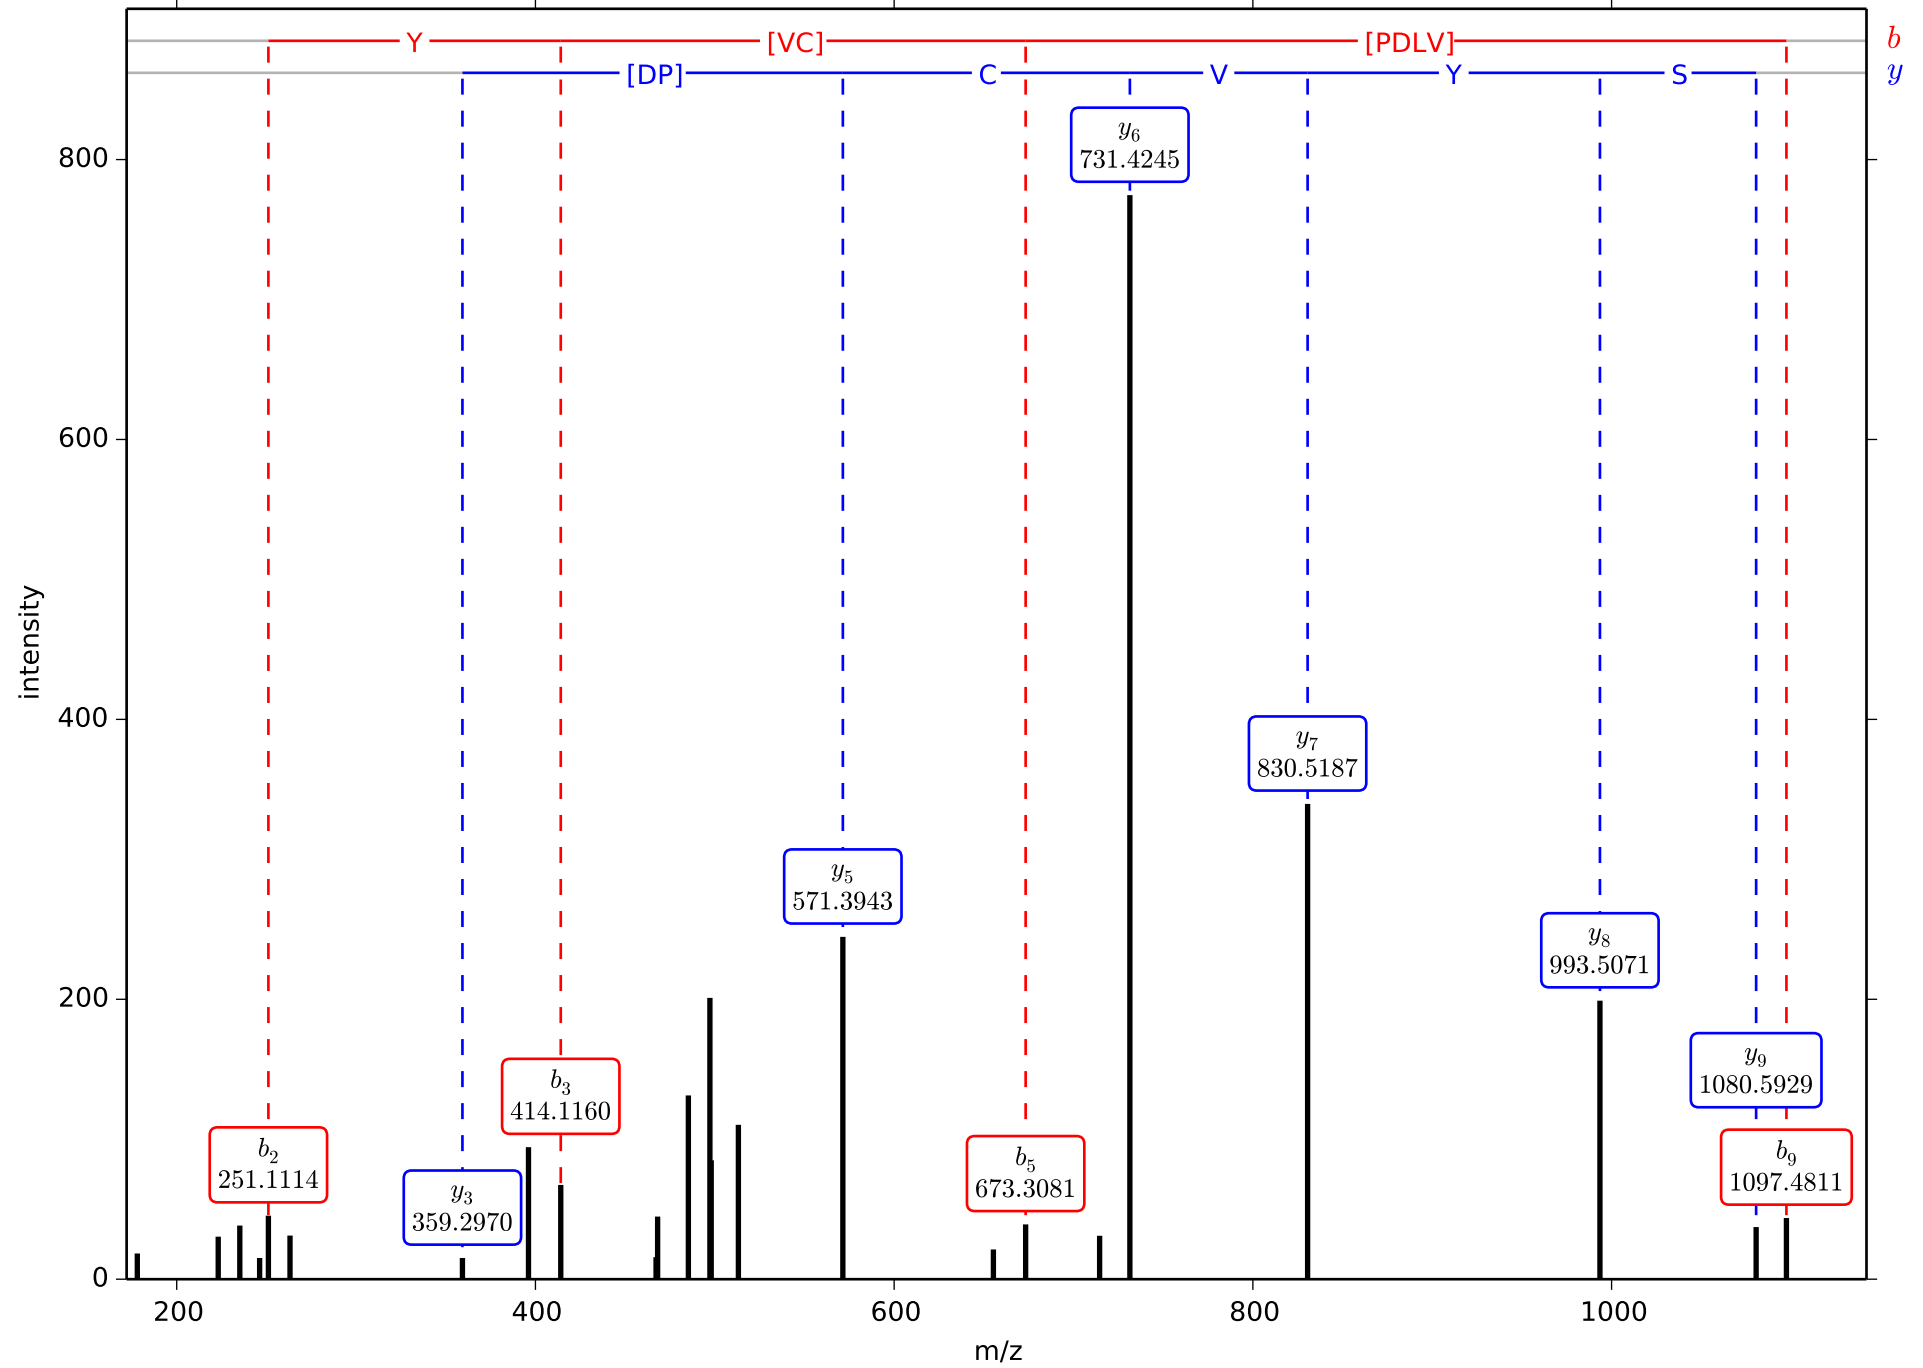



P62746 : IQAYDYLECSAK

parent: 730.838860,2+

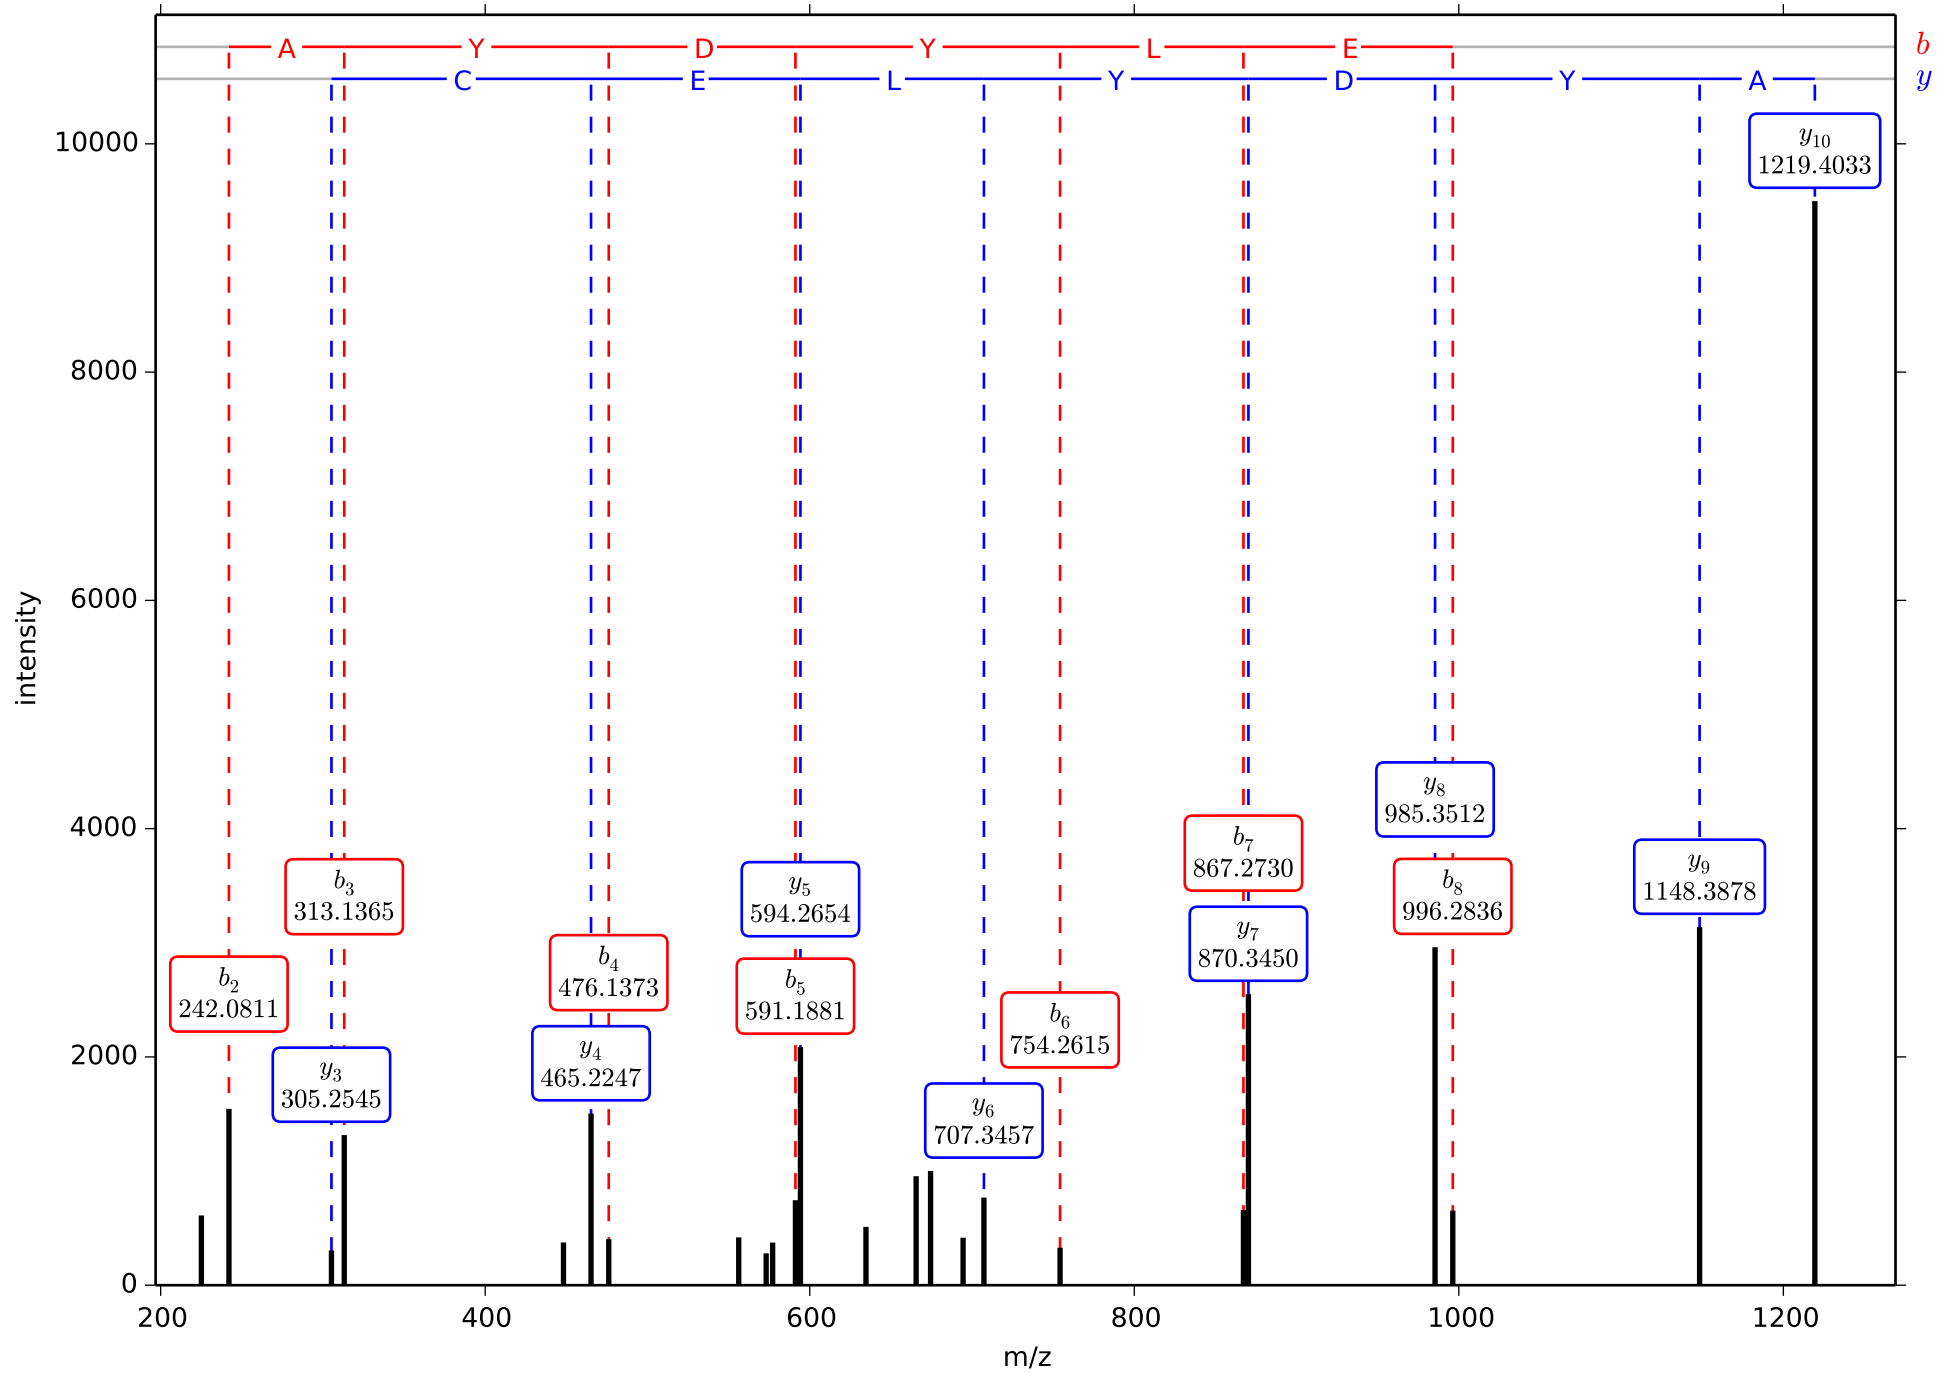

Q3UHL1 : PFGCVTLGDKK

parent: 407.881440,3+

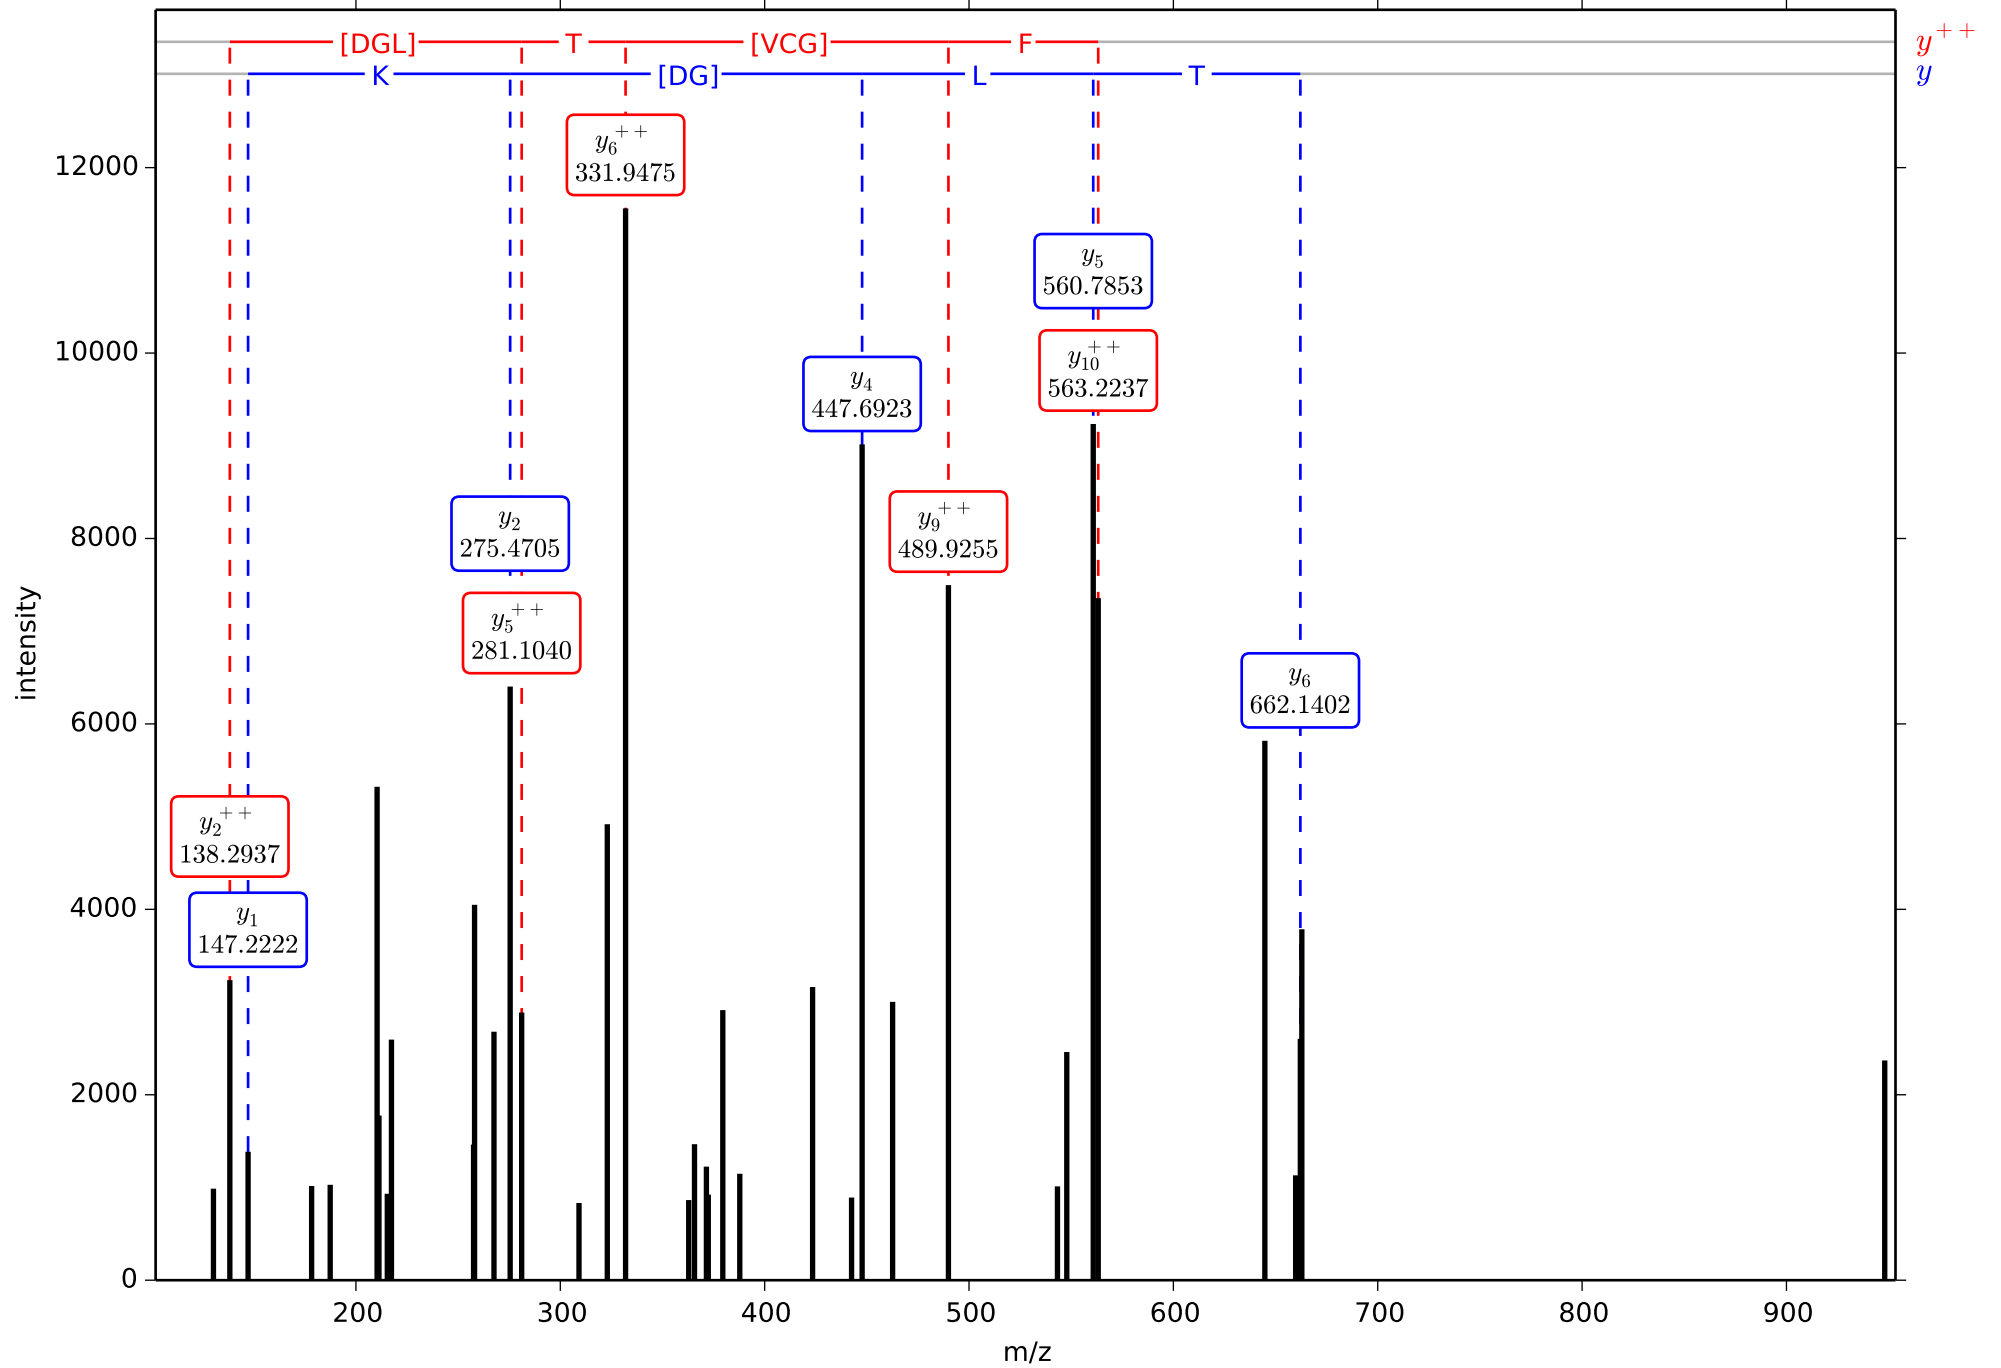

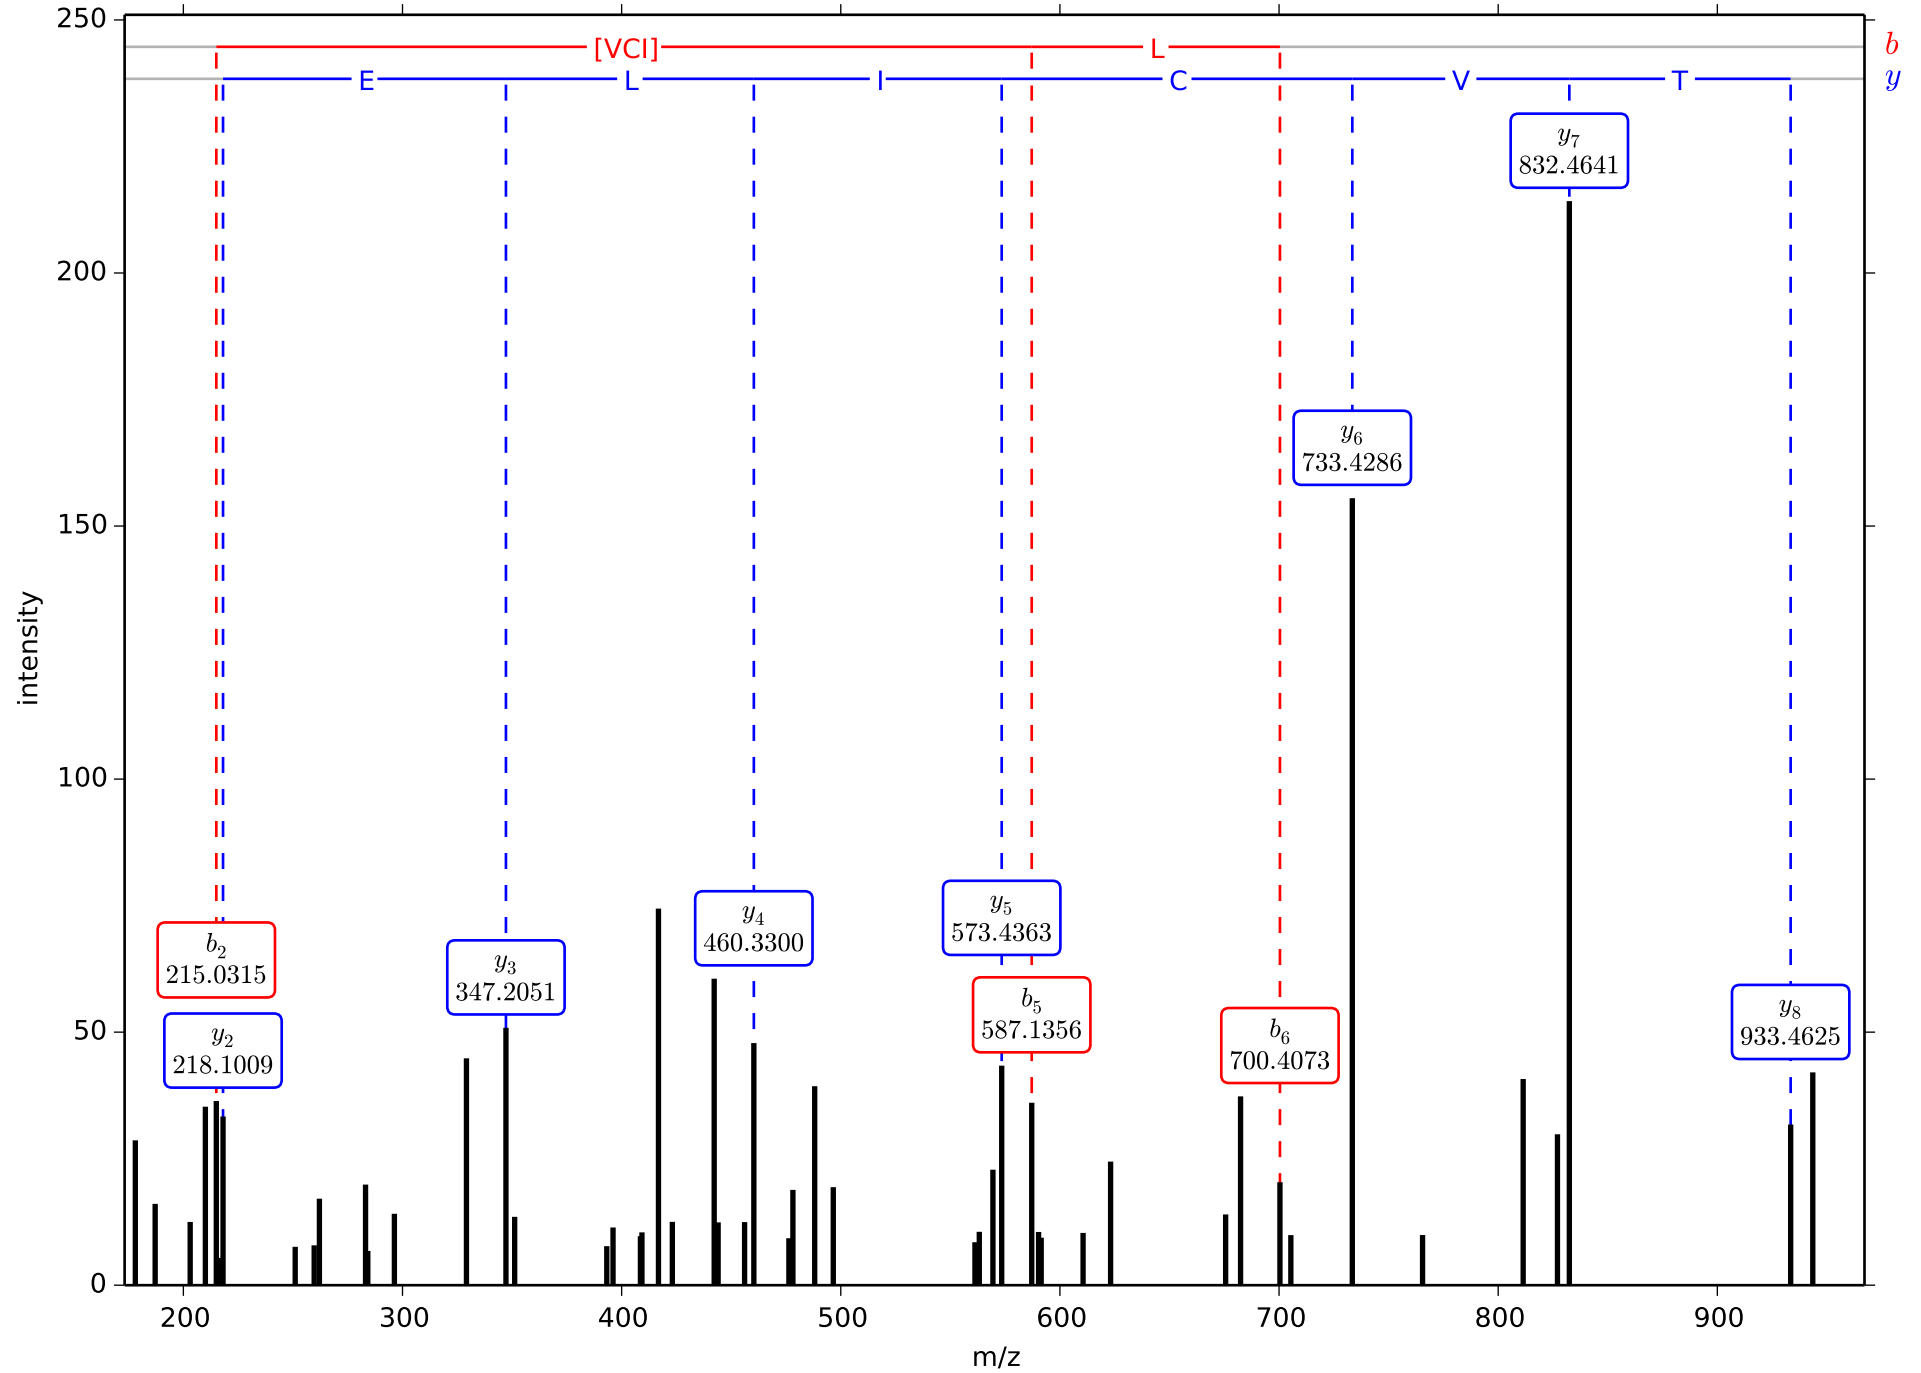

P60335 : LVVPATQCGSLIGK

parent: 721.903370,2+

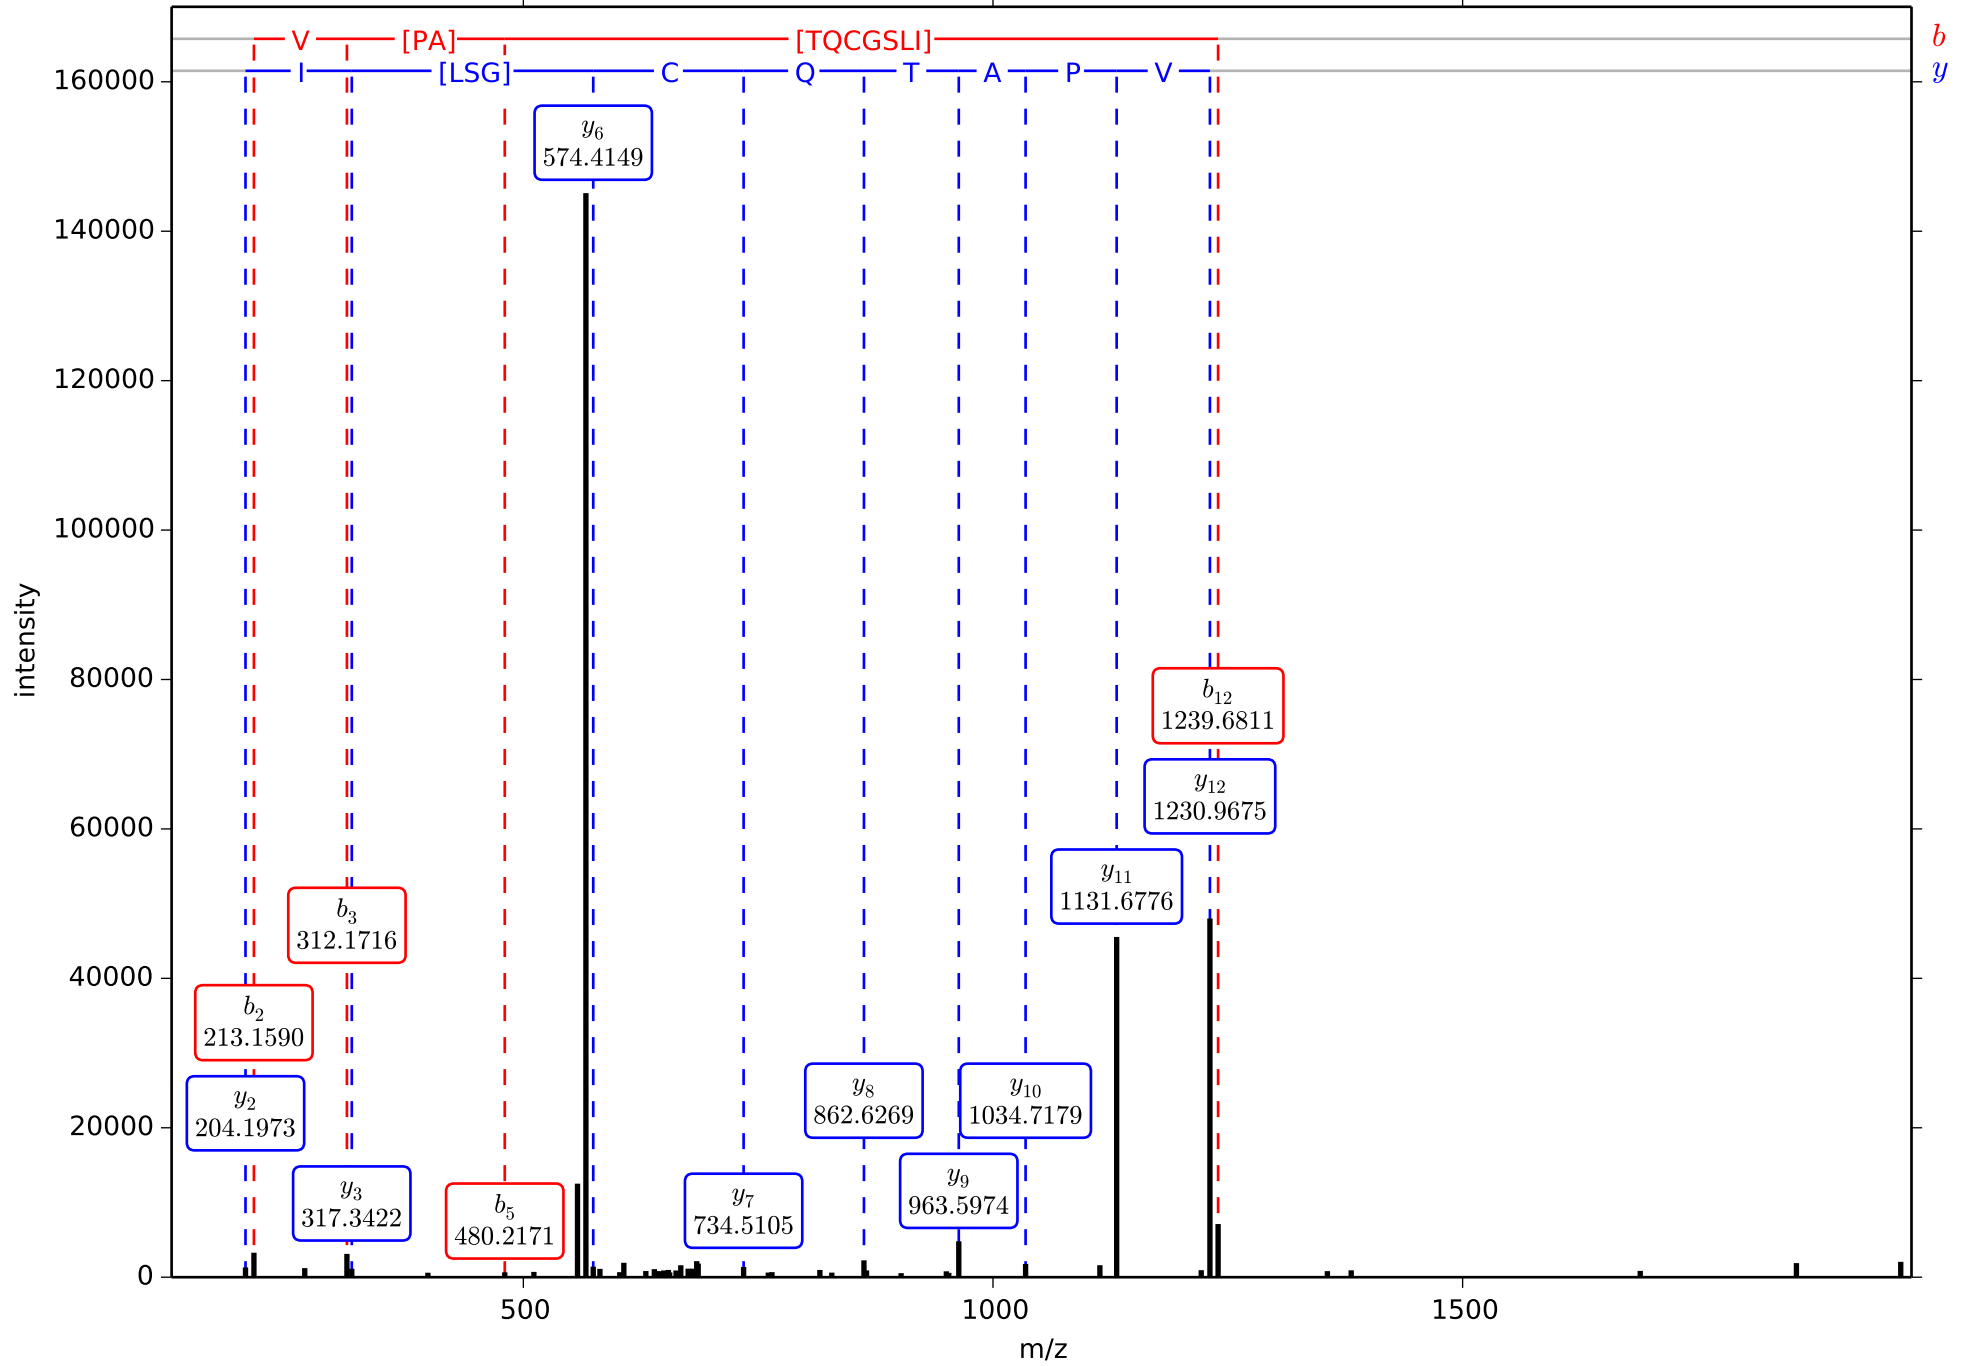

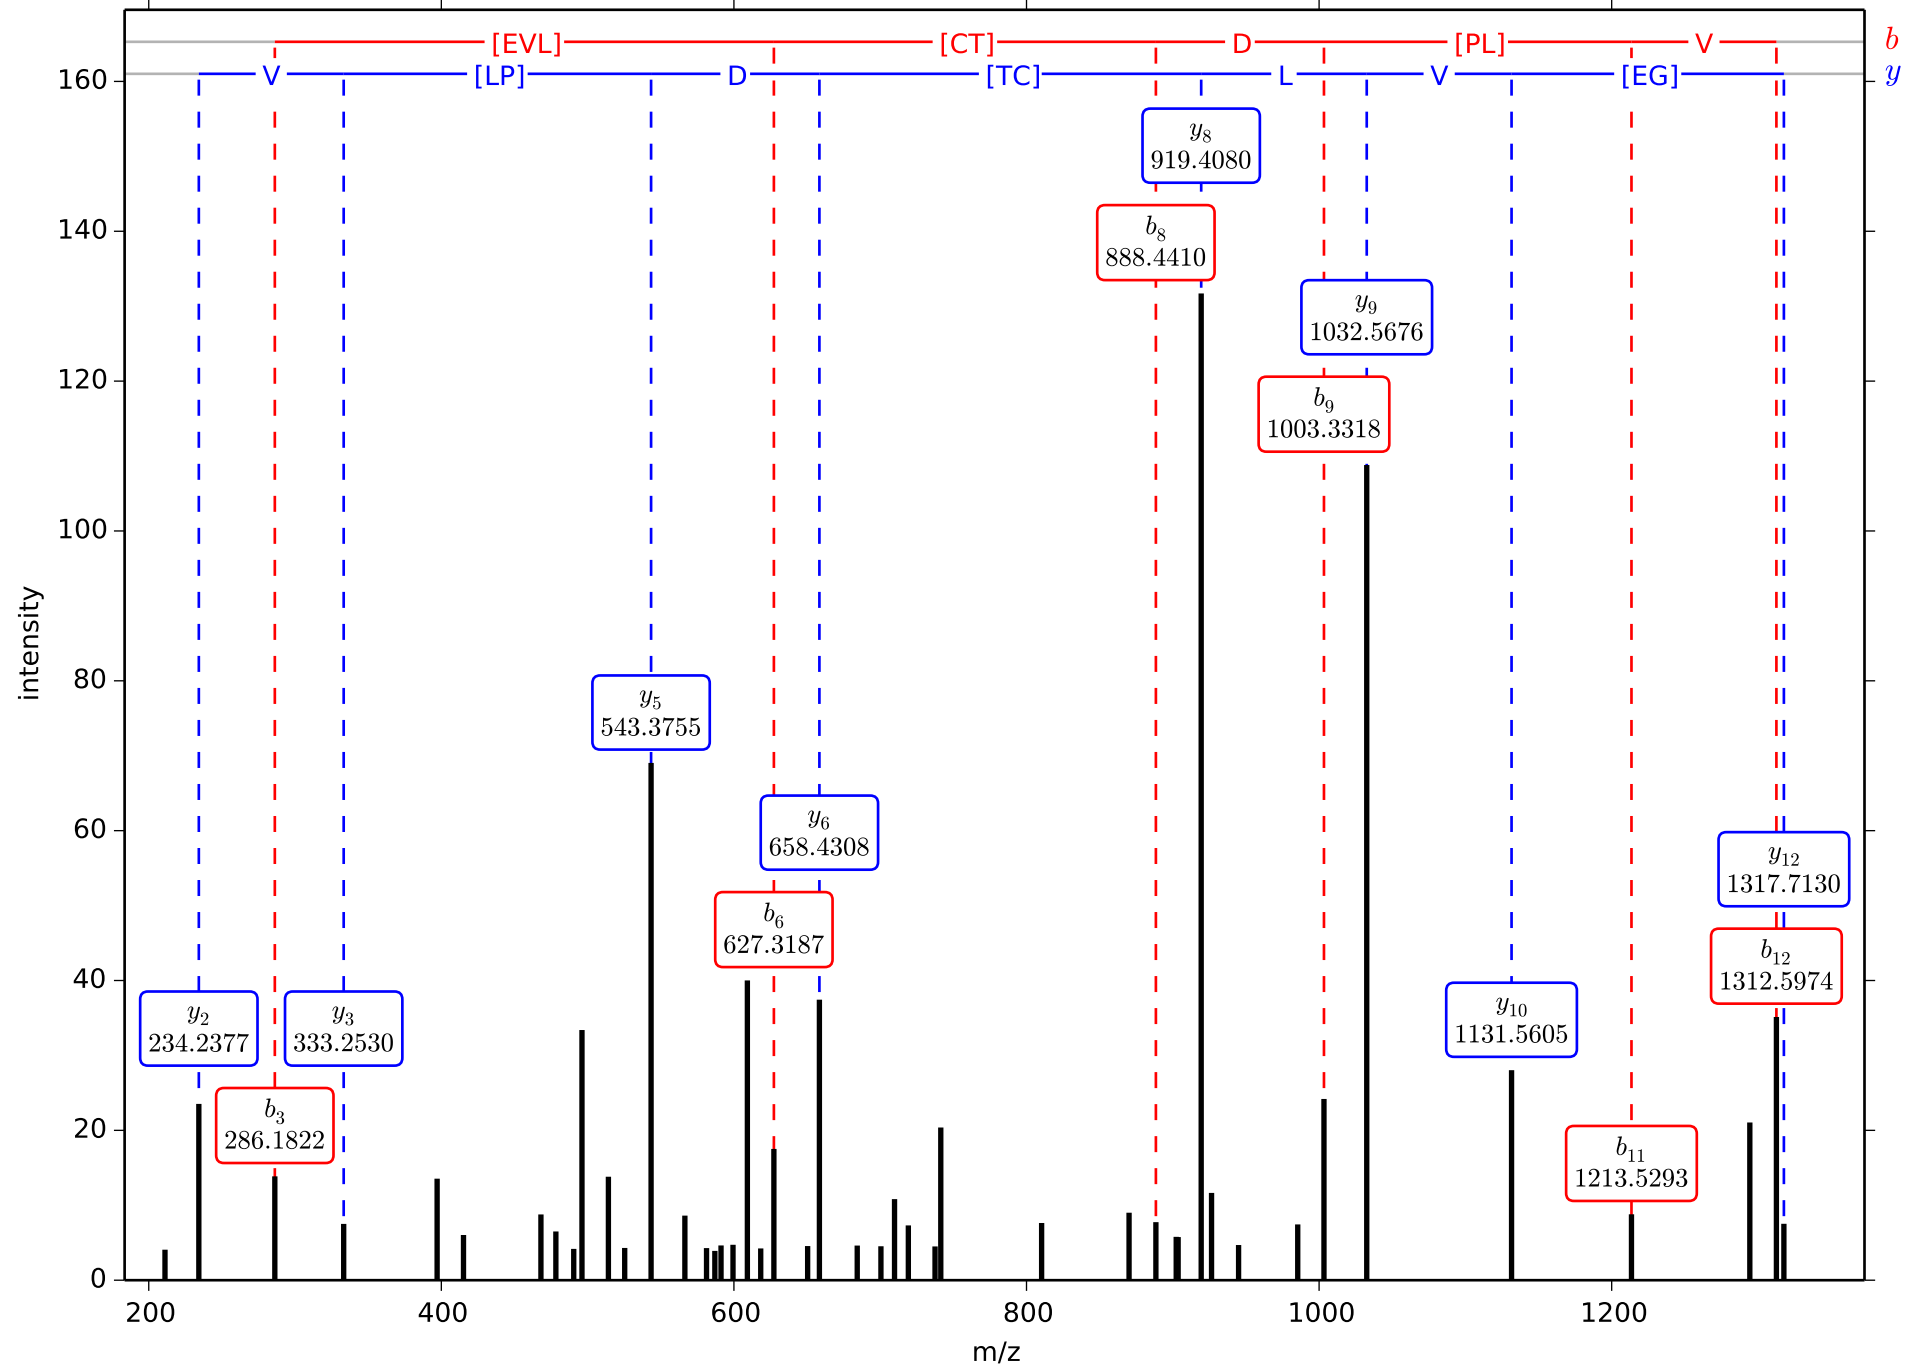

O70325 : ILAFPCNQFGR

parent: 661.837620,2+

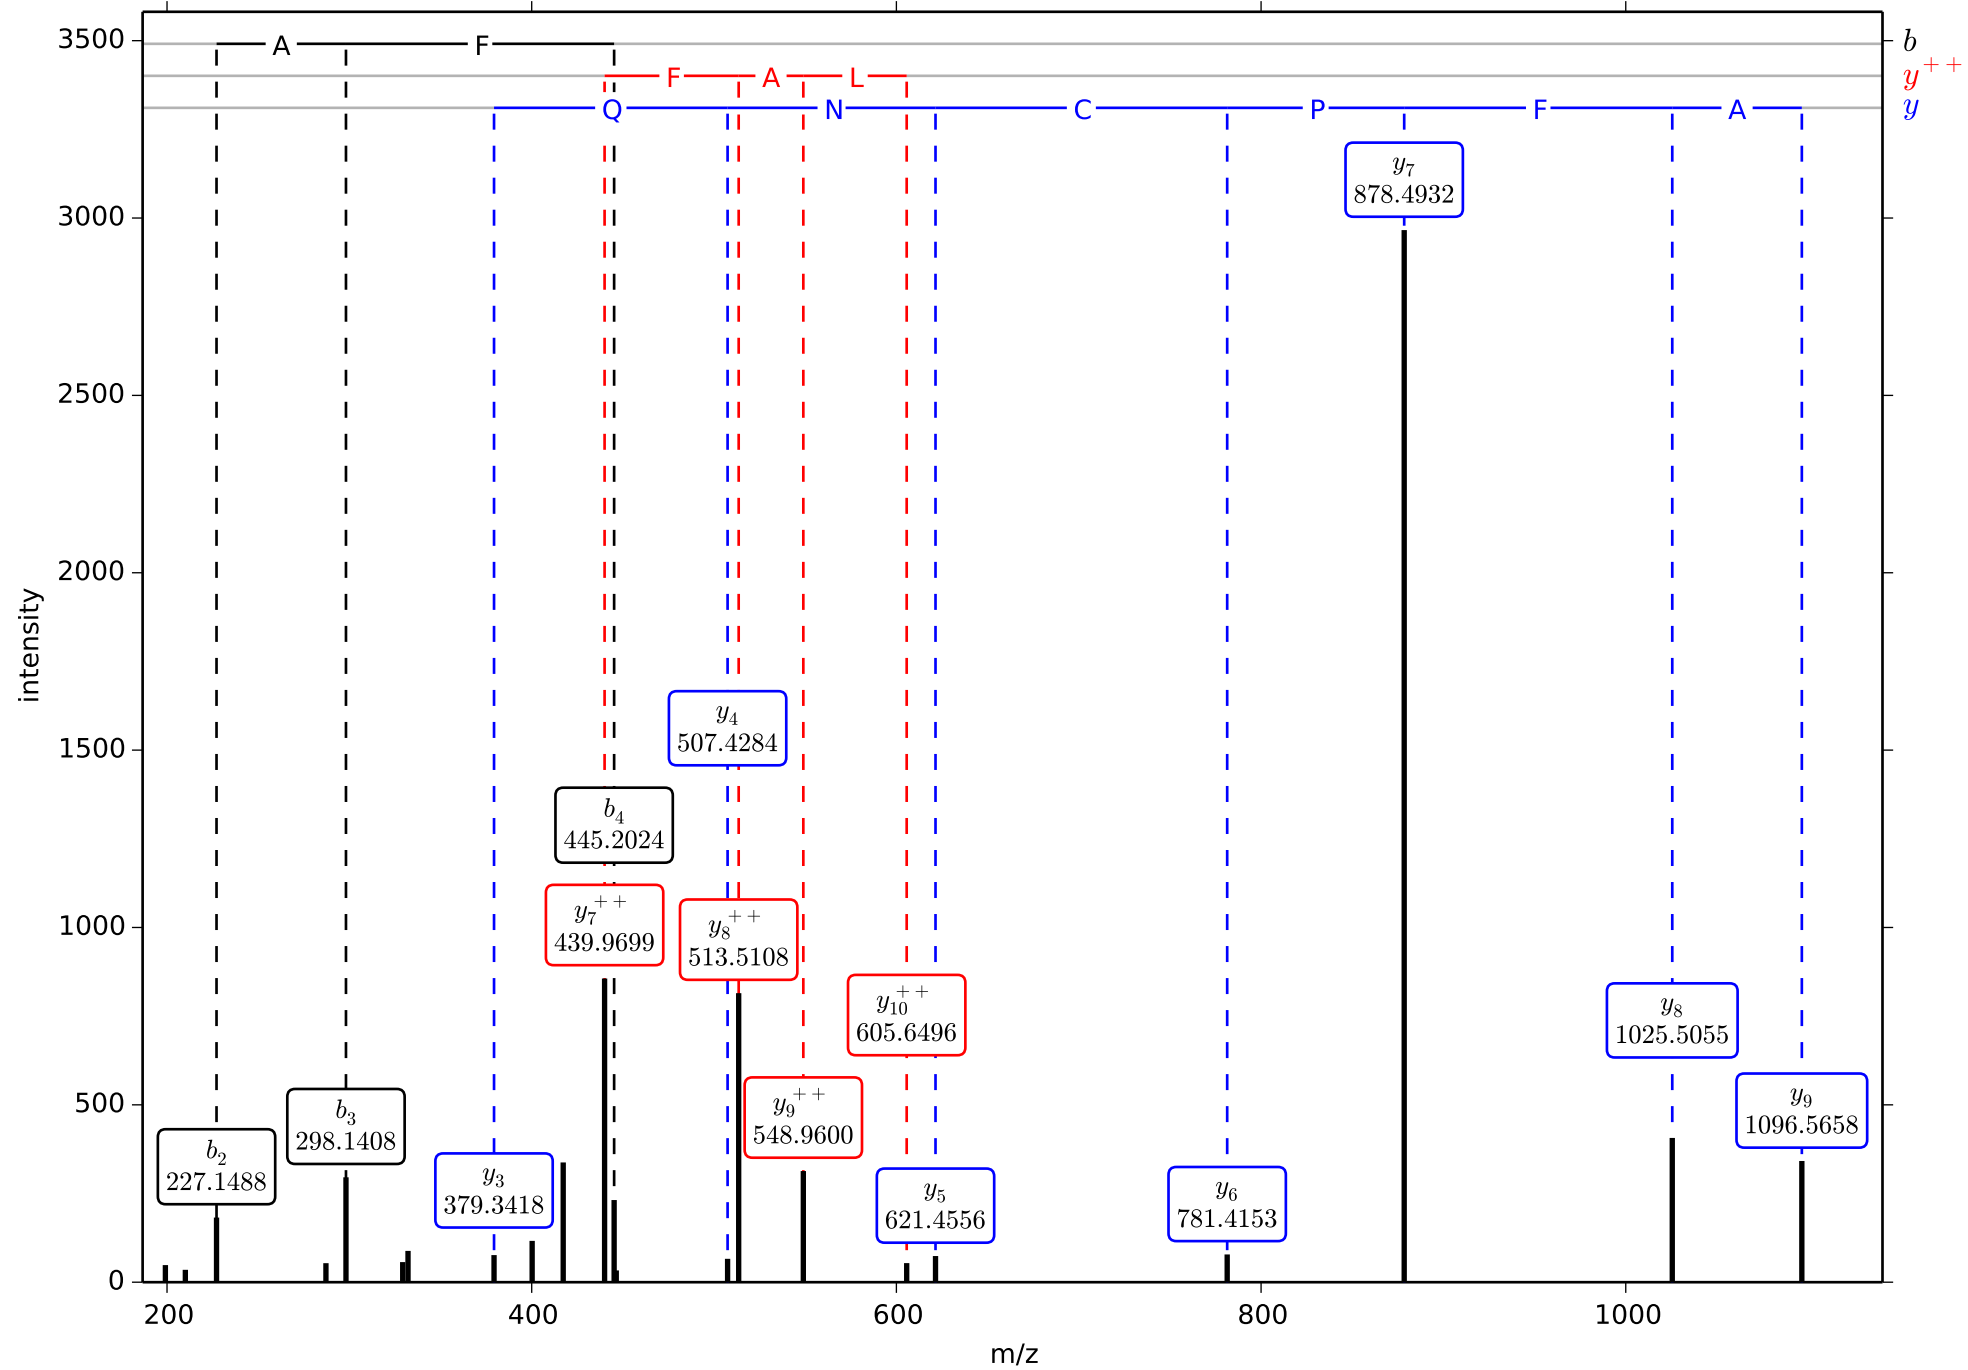

Q8R366 : LTVHEGQELALGCLAQTK

parent: 656.677550,3+

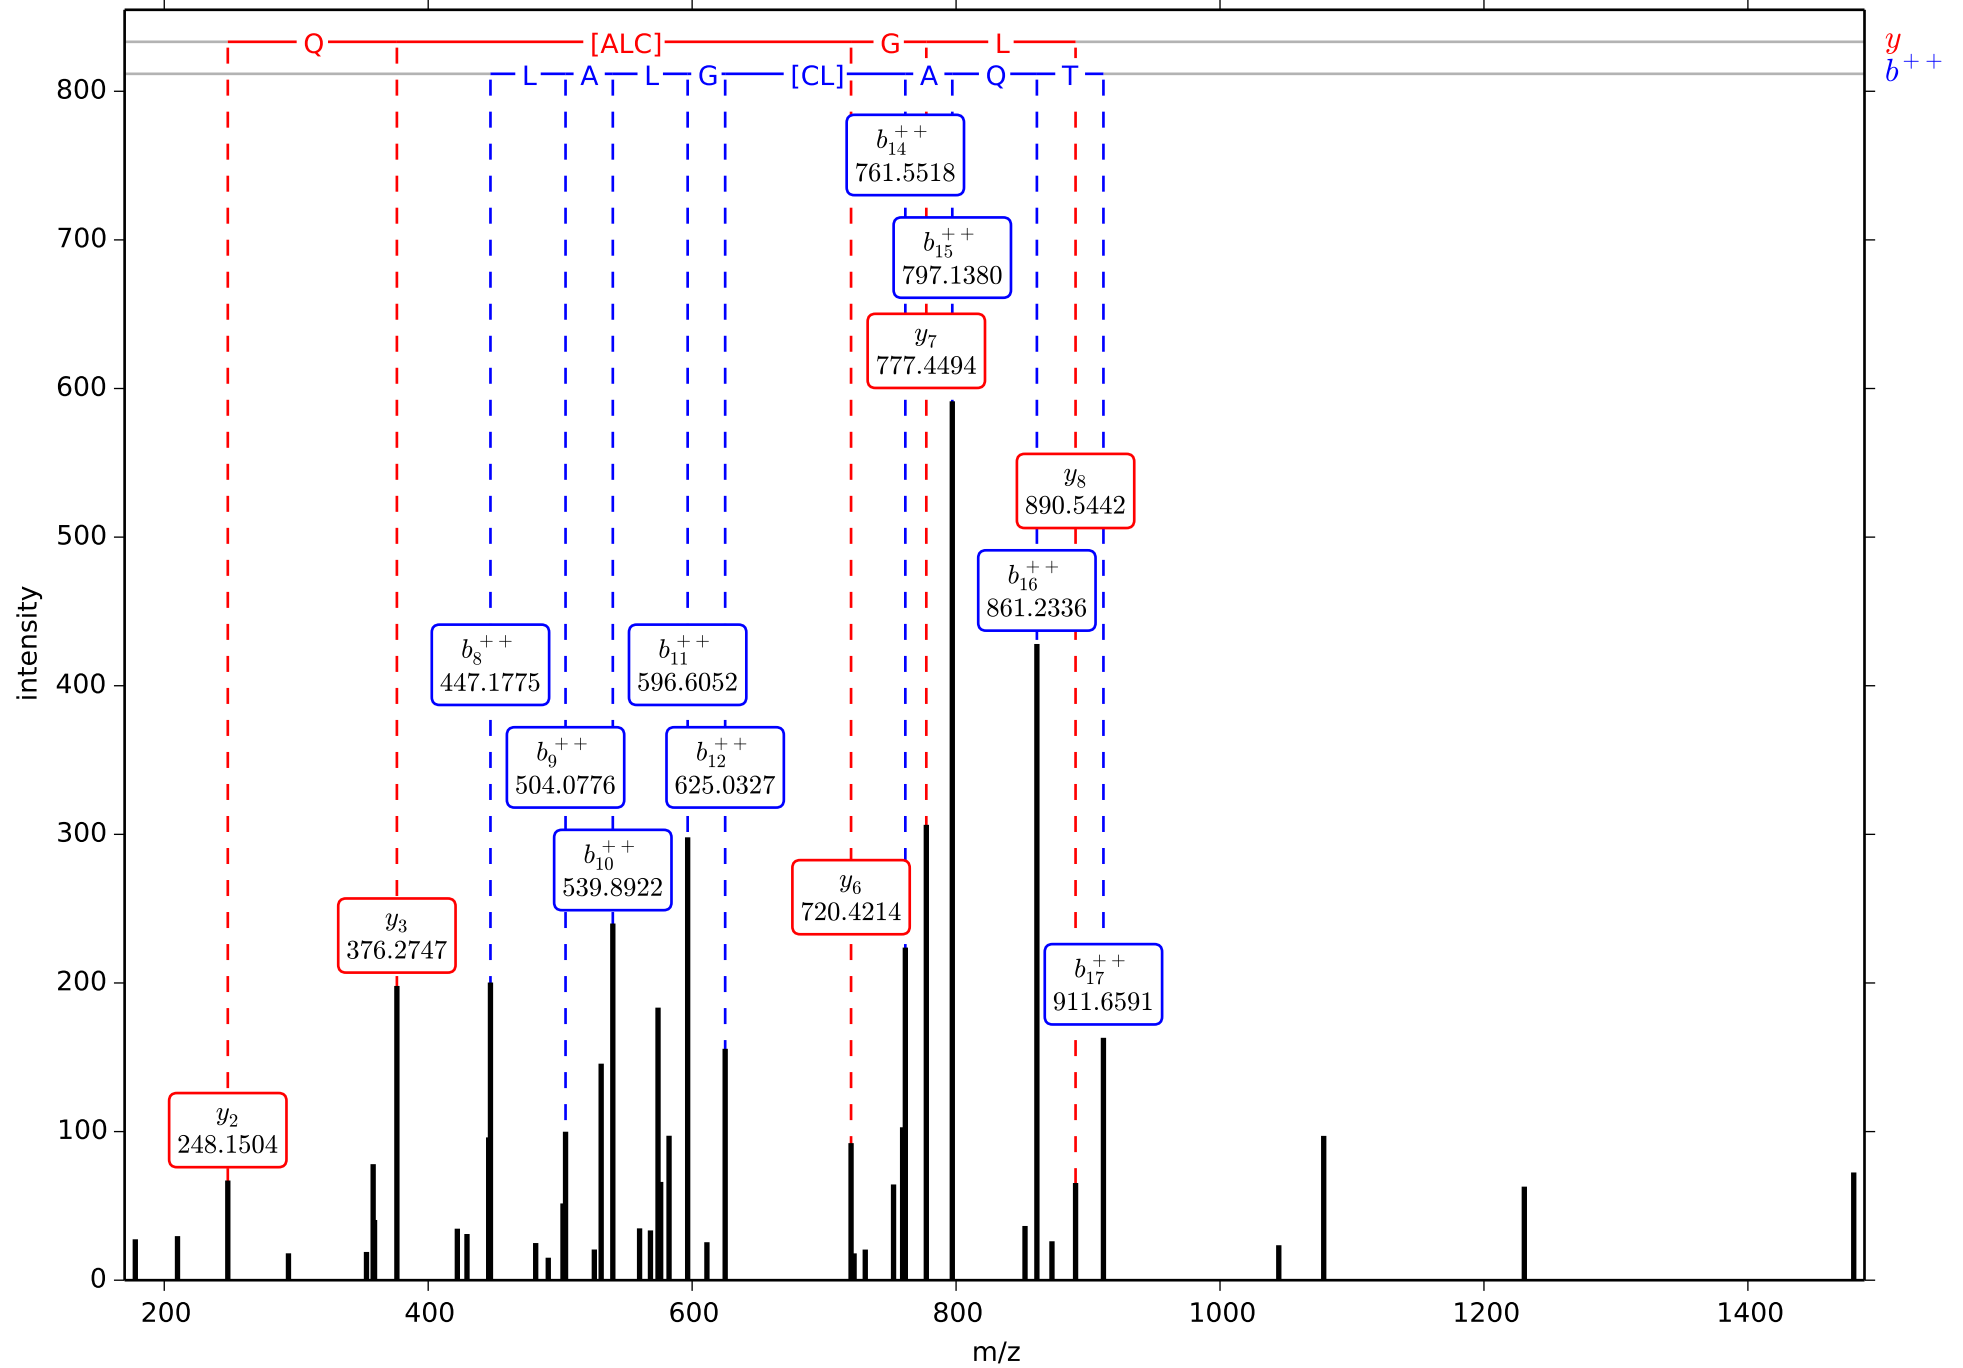

O54803 : LCDLLLLLYVDR

parent: 464.926150,3+

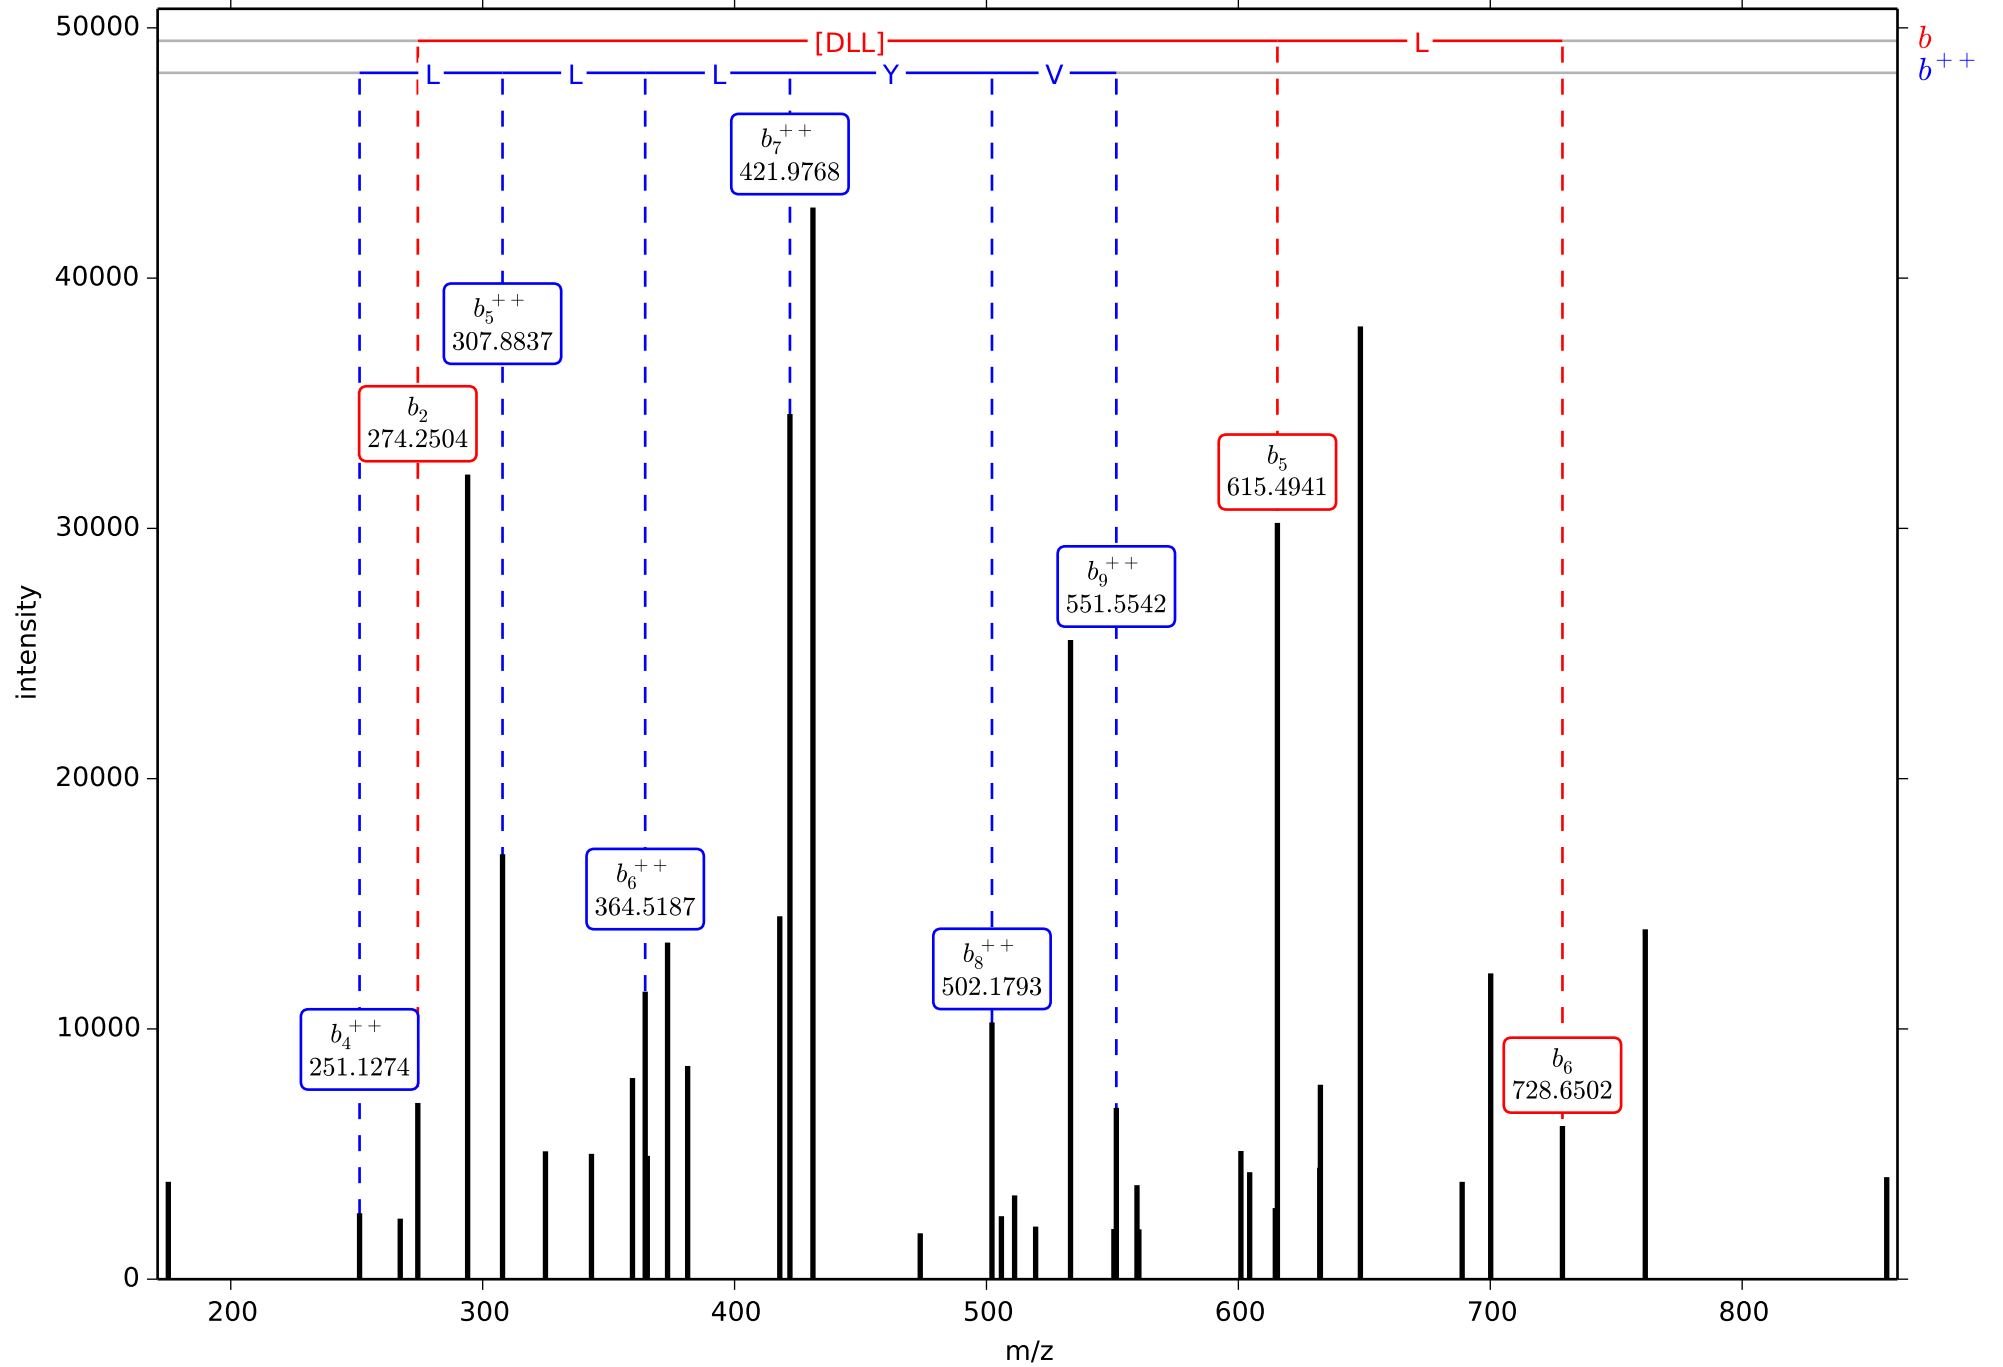



Q9JIS5 : DMCLSDSNKGMLGLIVYLGMMVGA

parent: 869.742270,3+

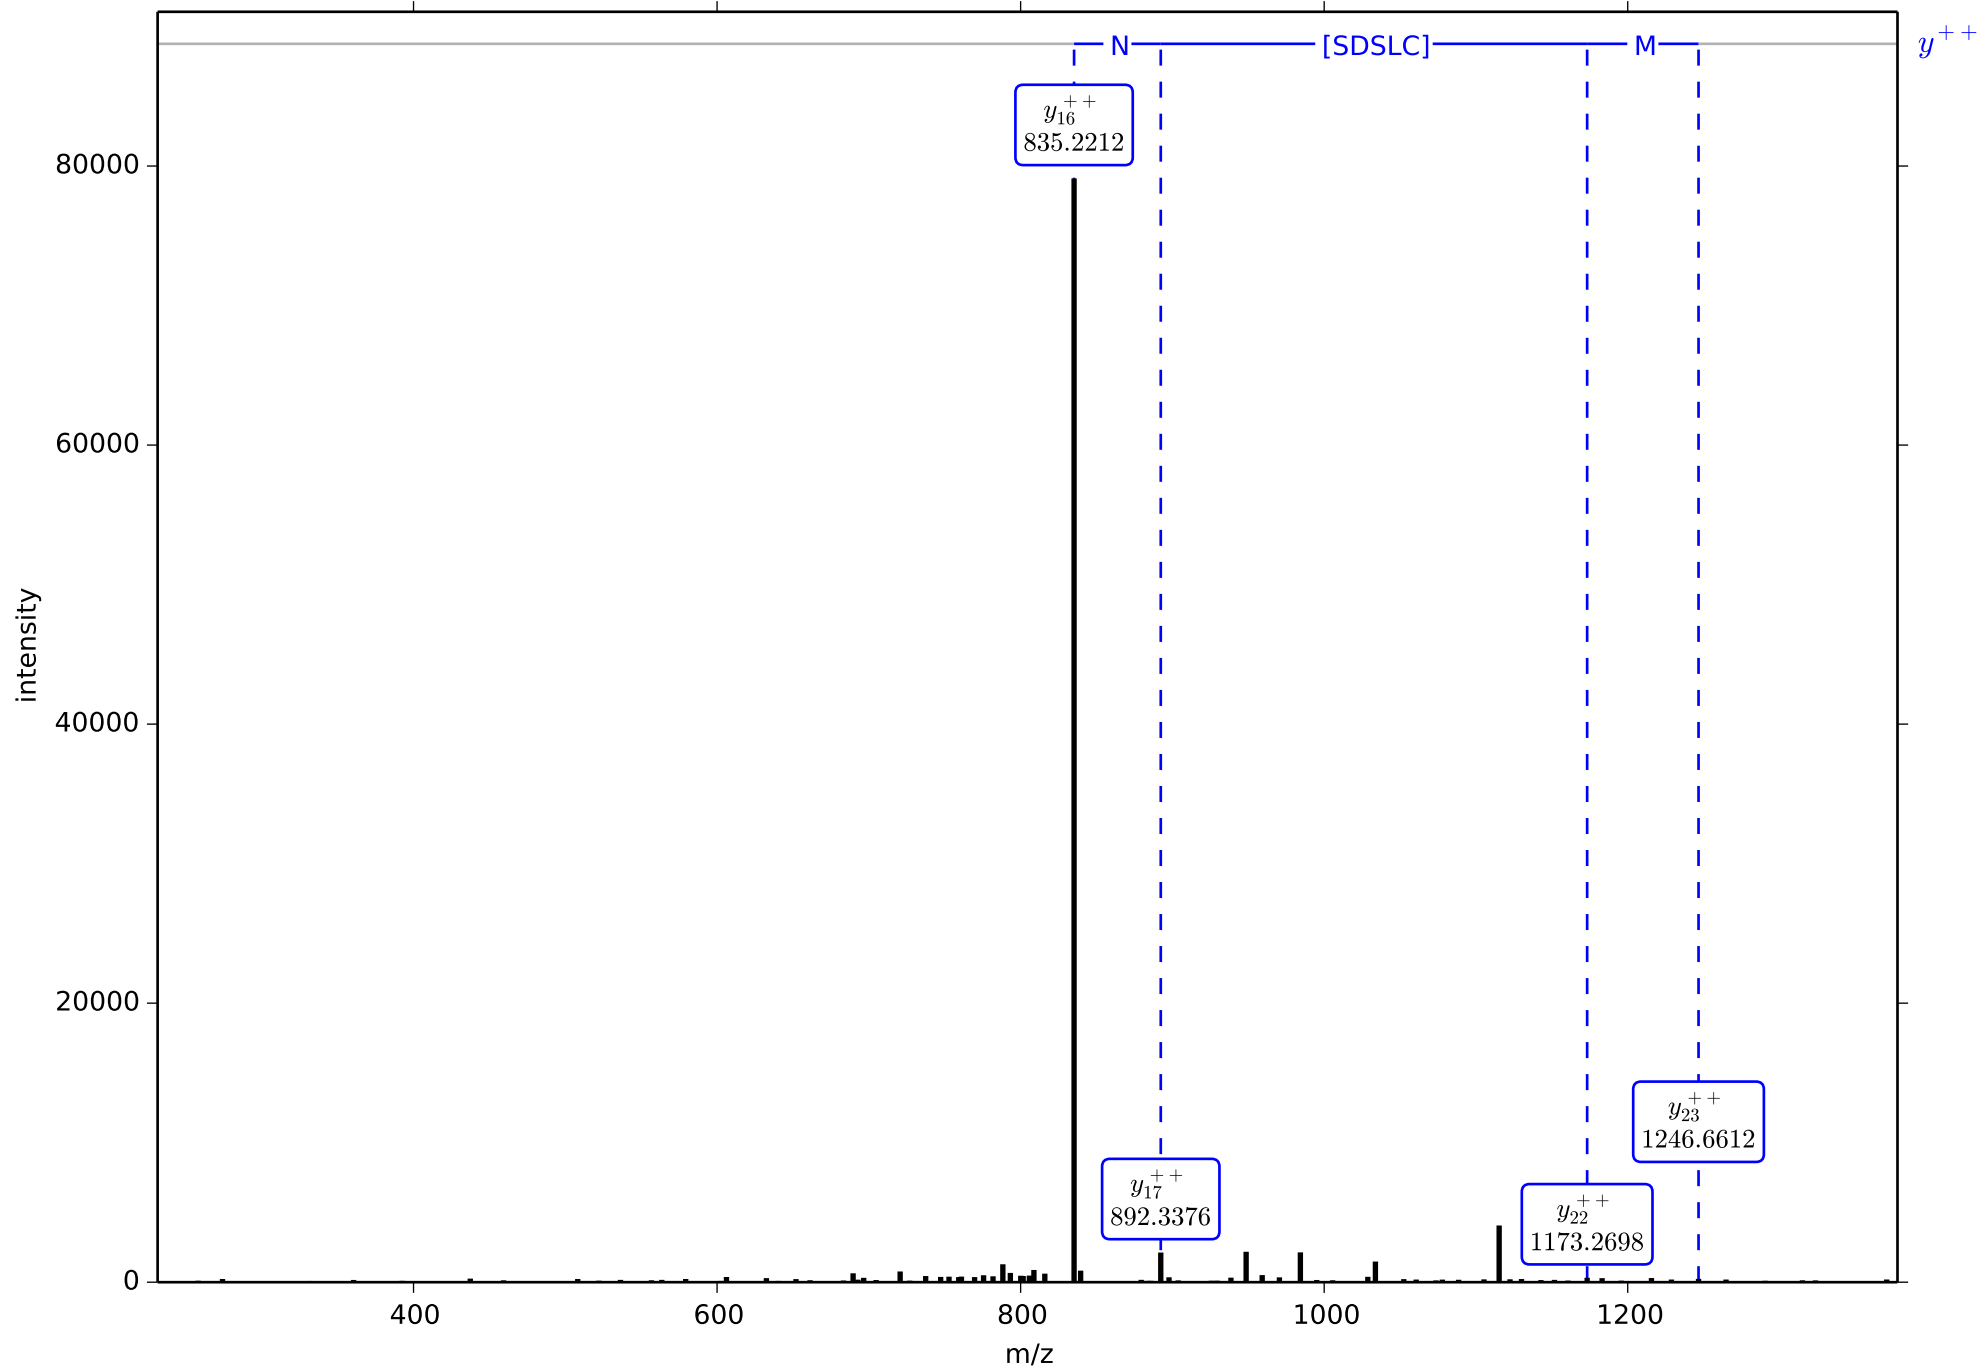

Q91V92 : YICTTSAIQNR

parent: 663.825350,2+

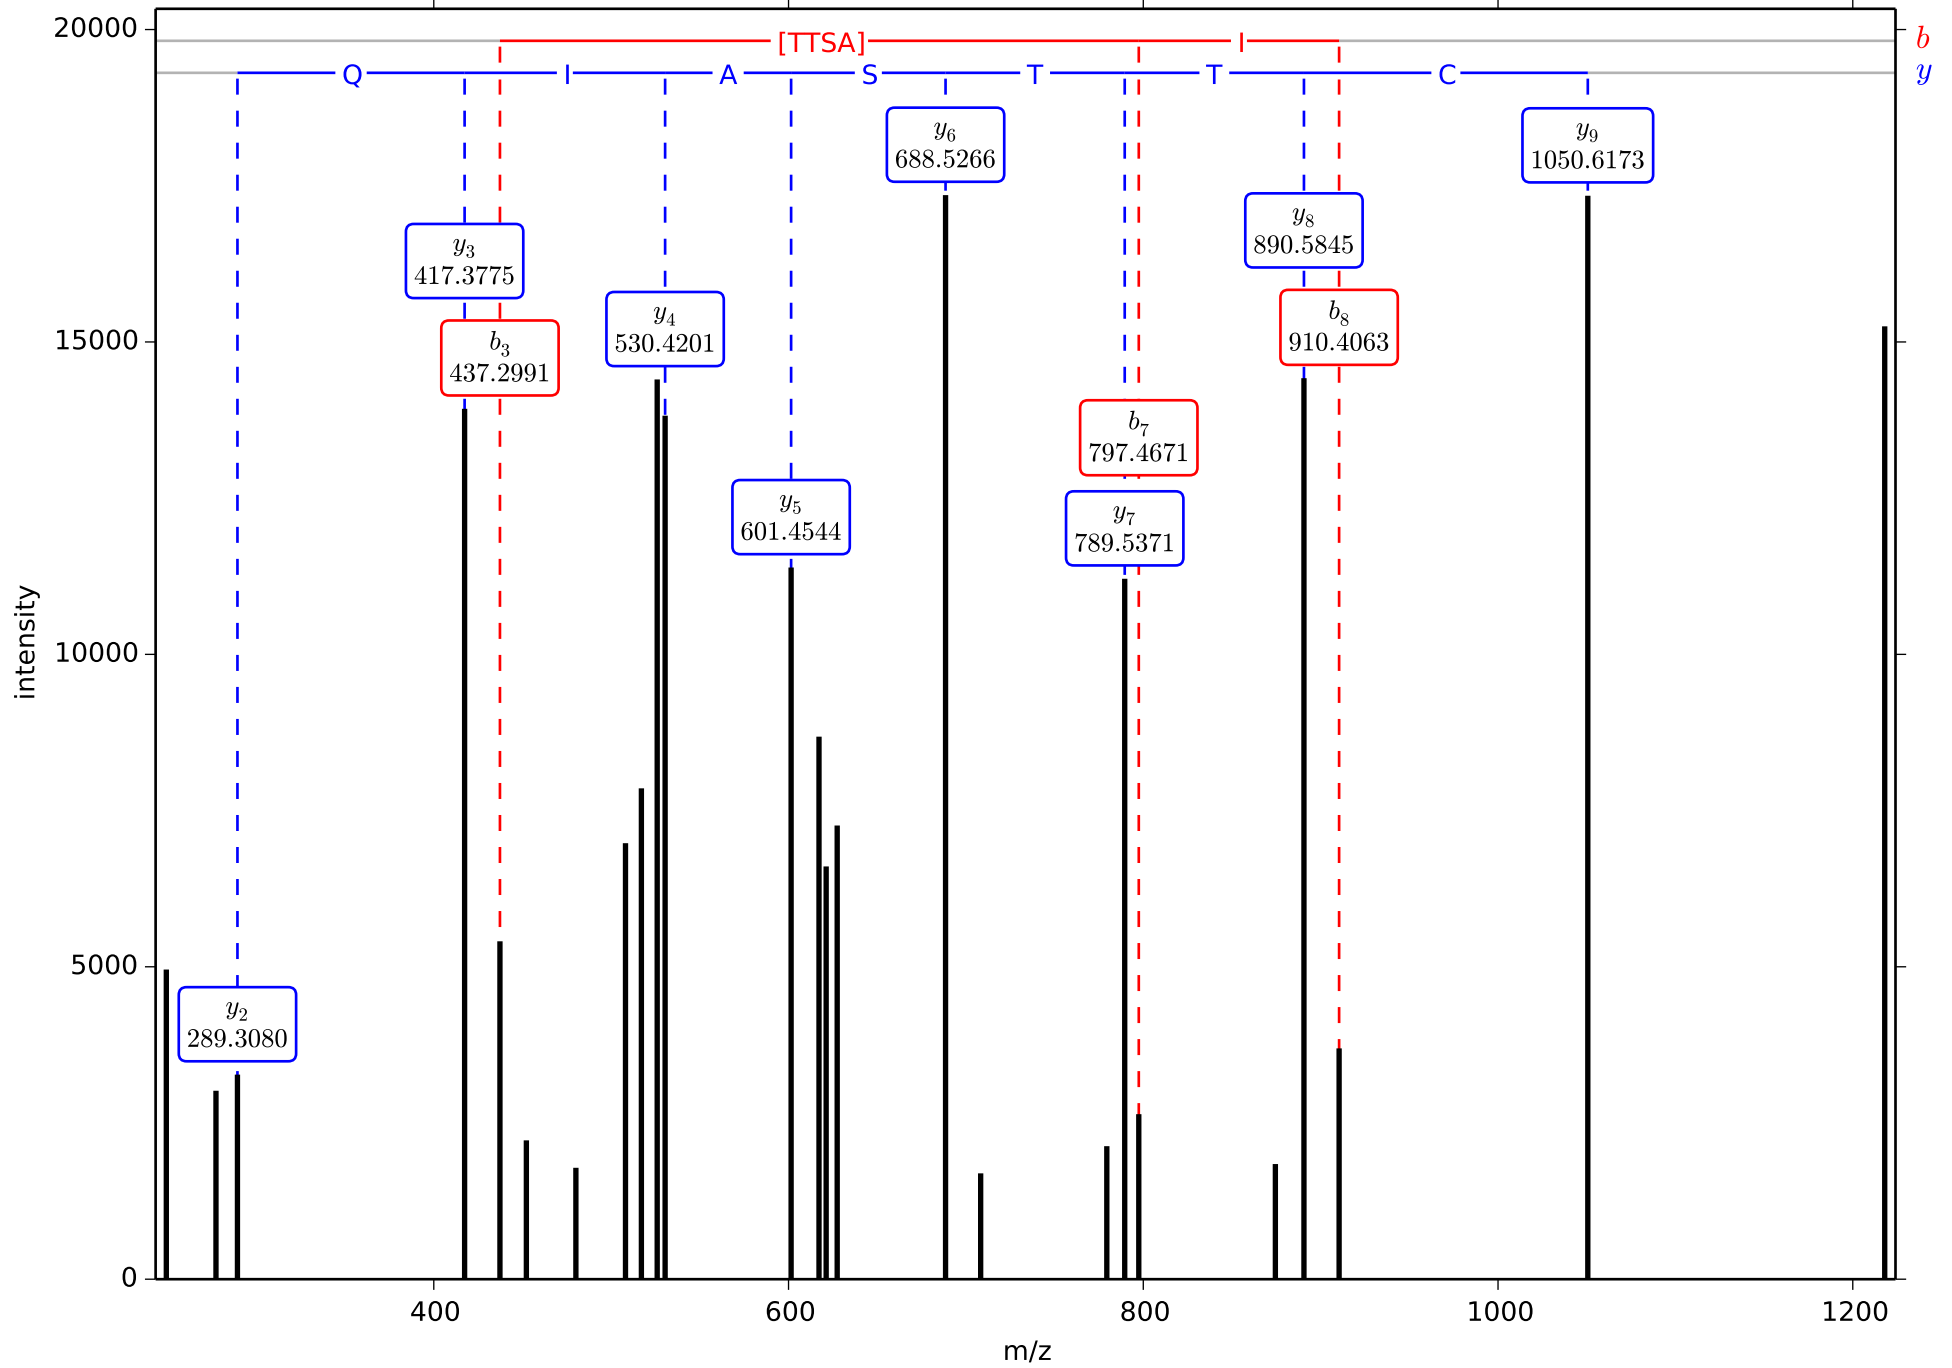

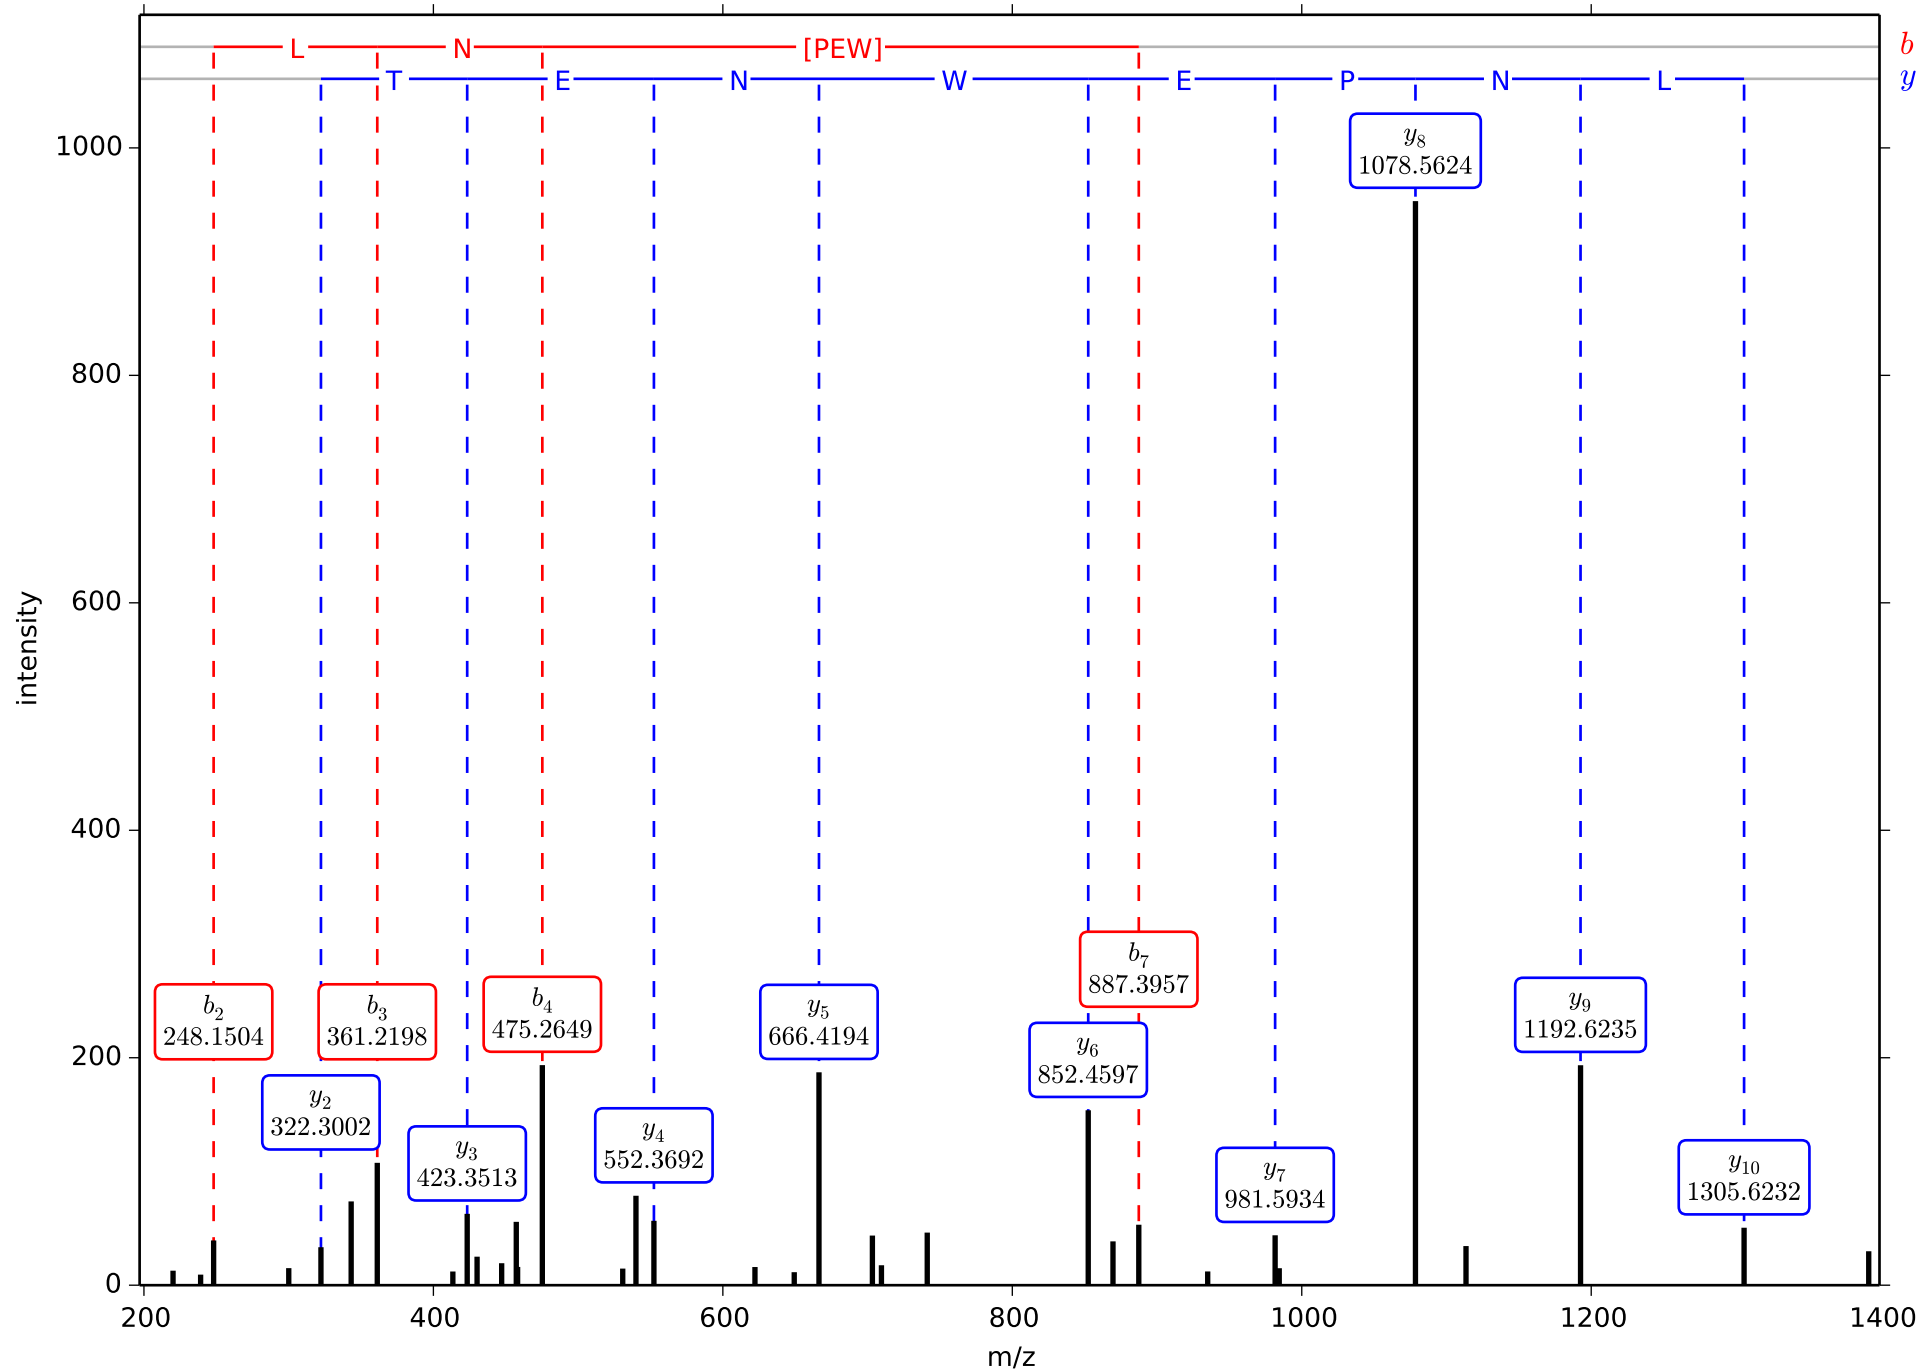

P63318 : FEACNYPLELYER

parent: 852.390250,2+

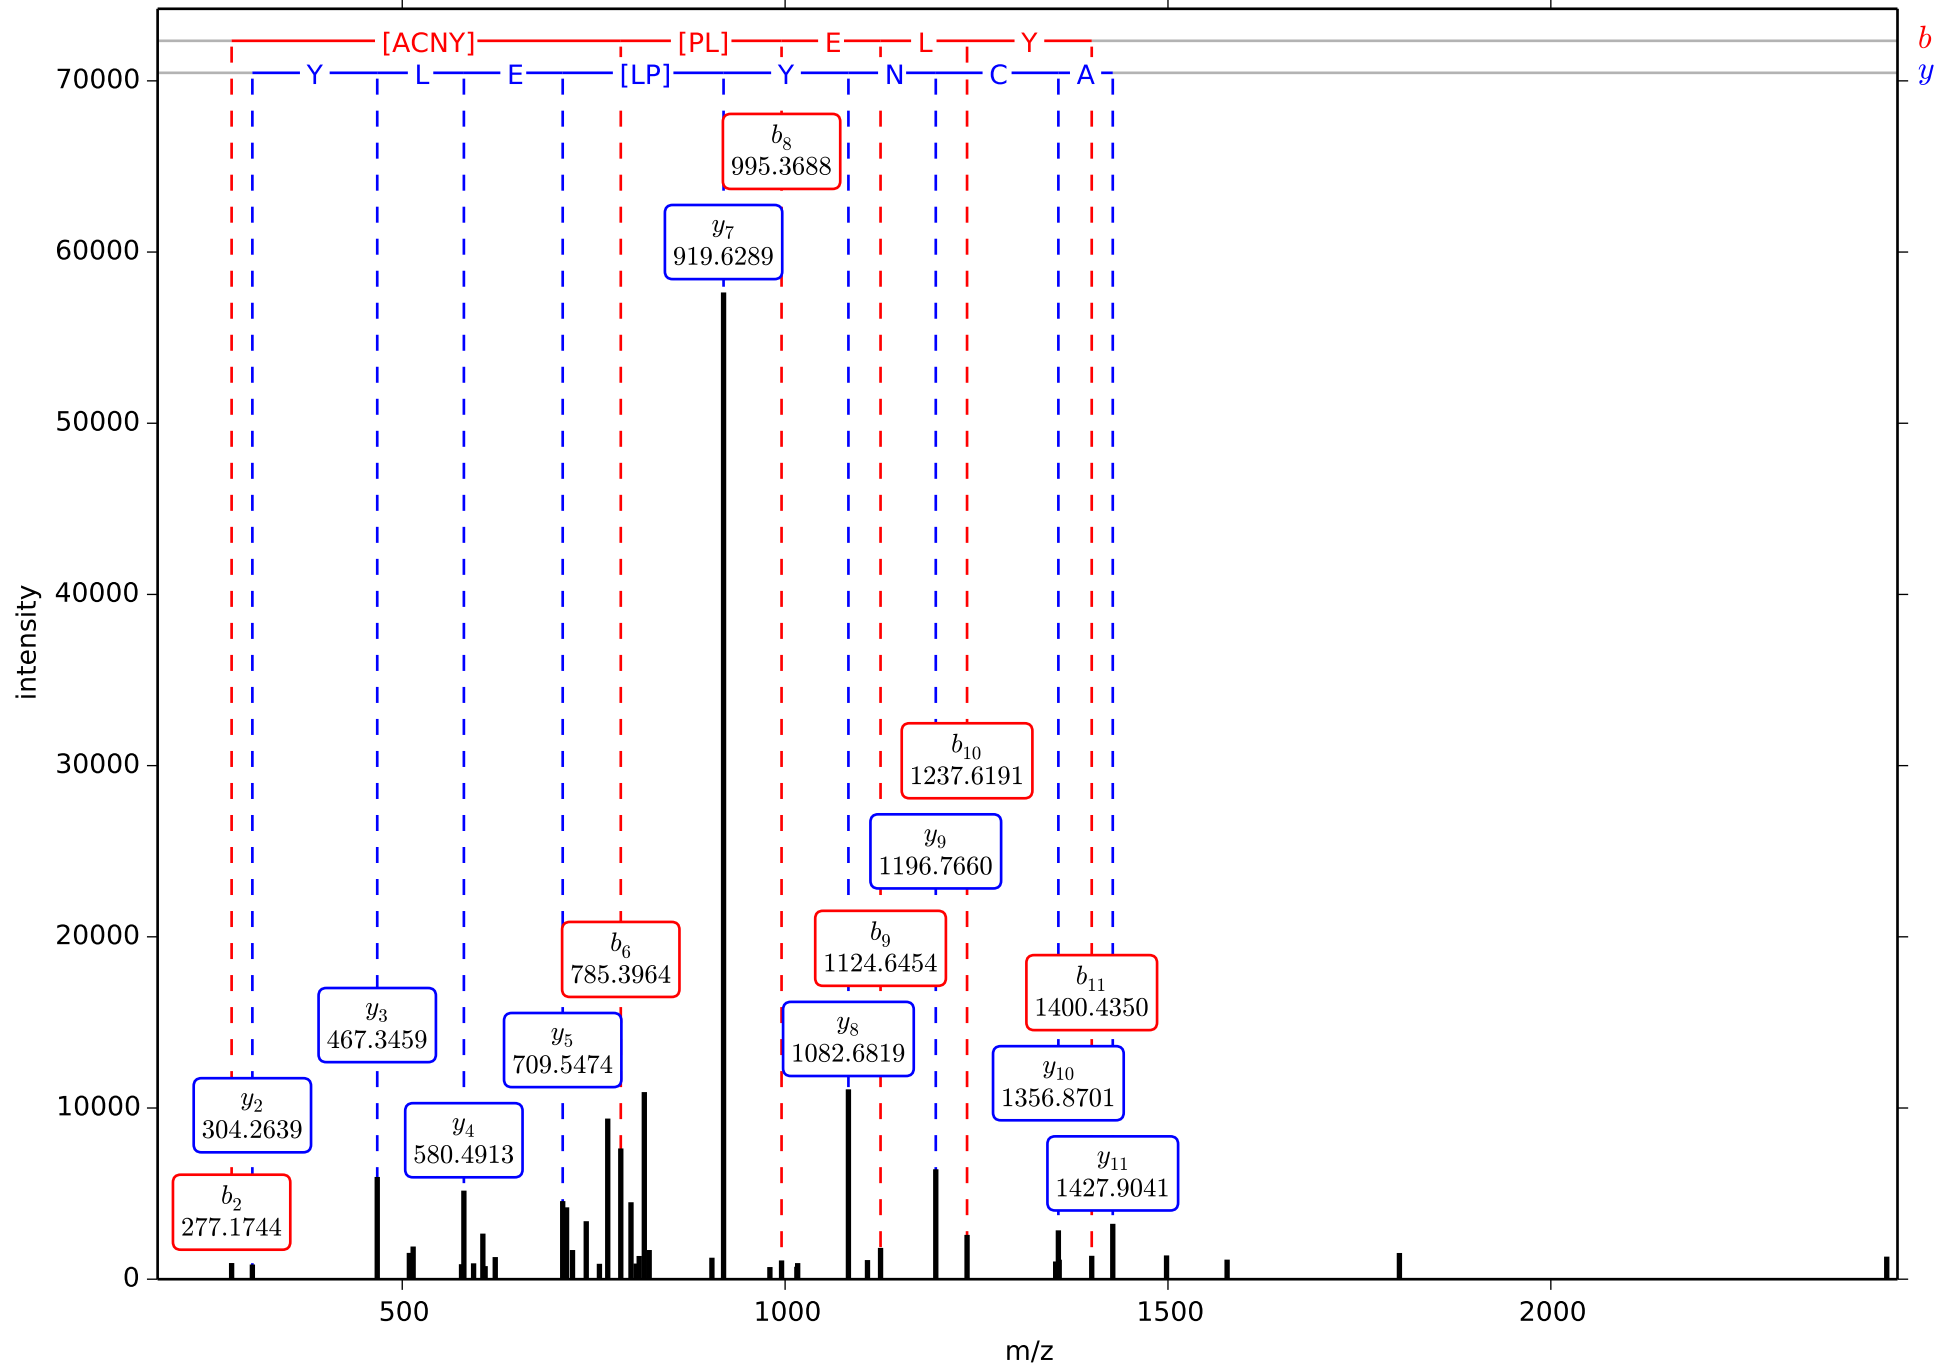

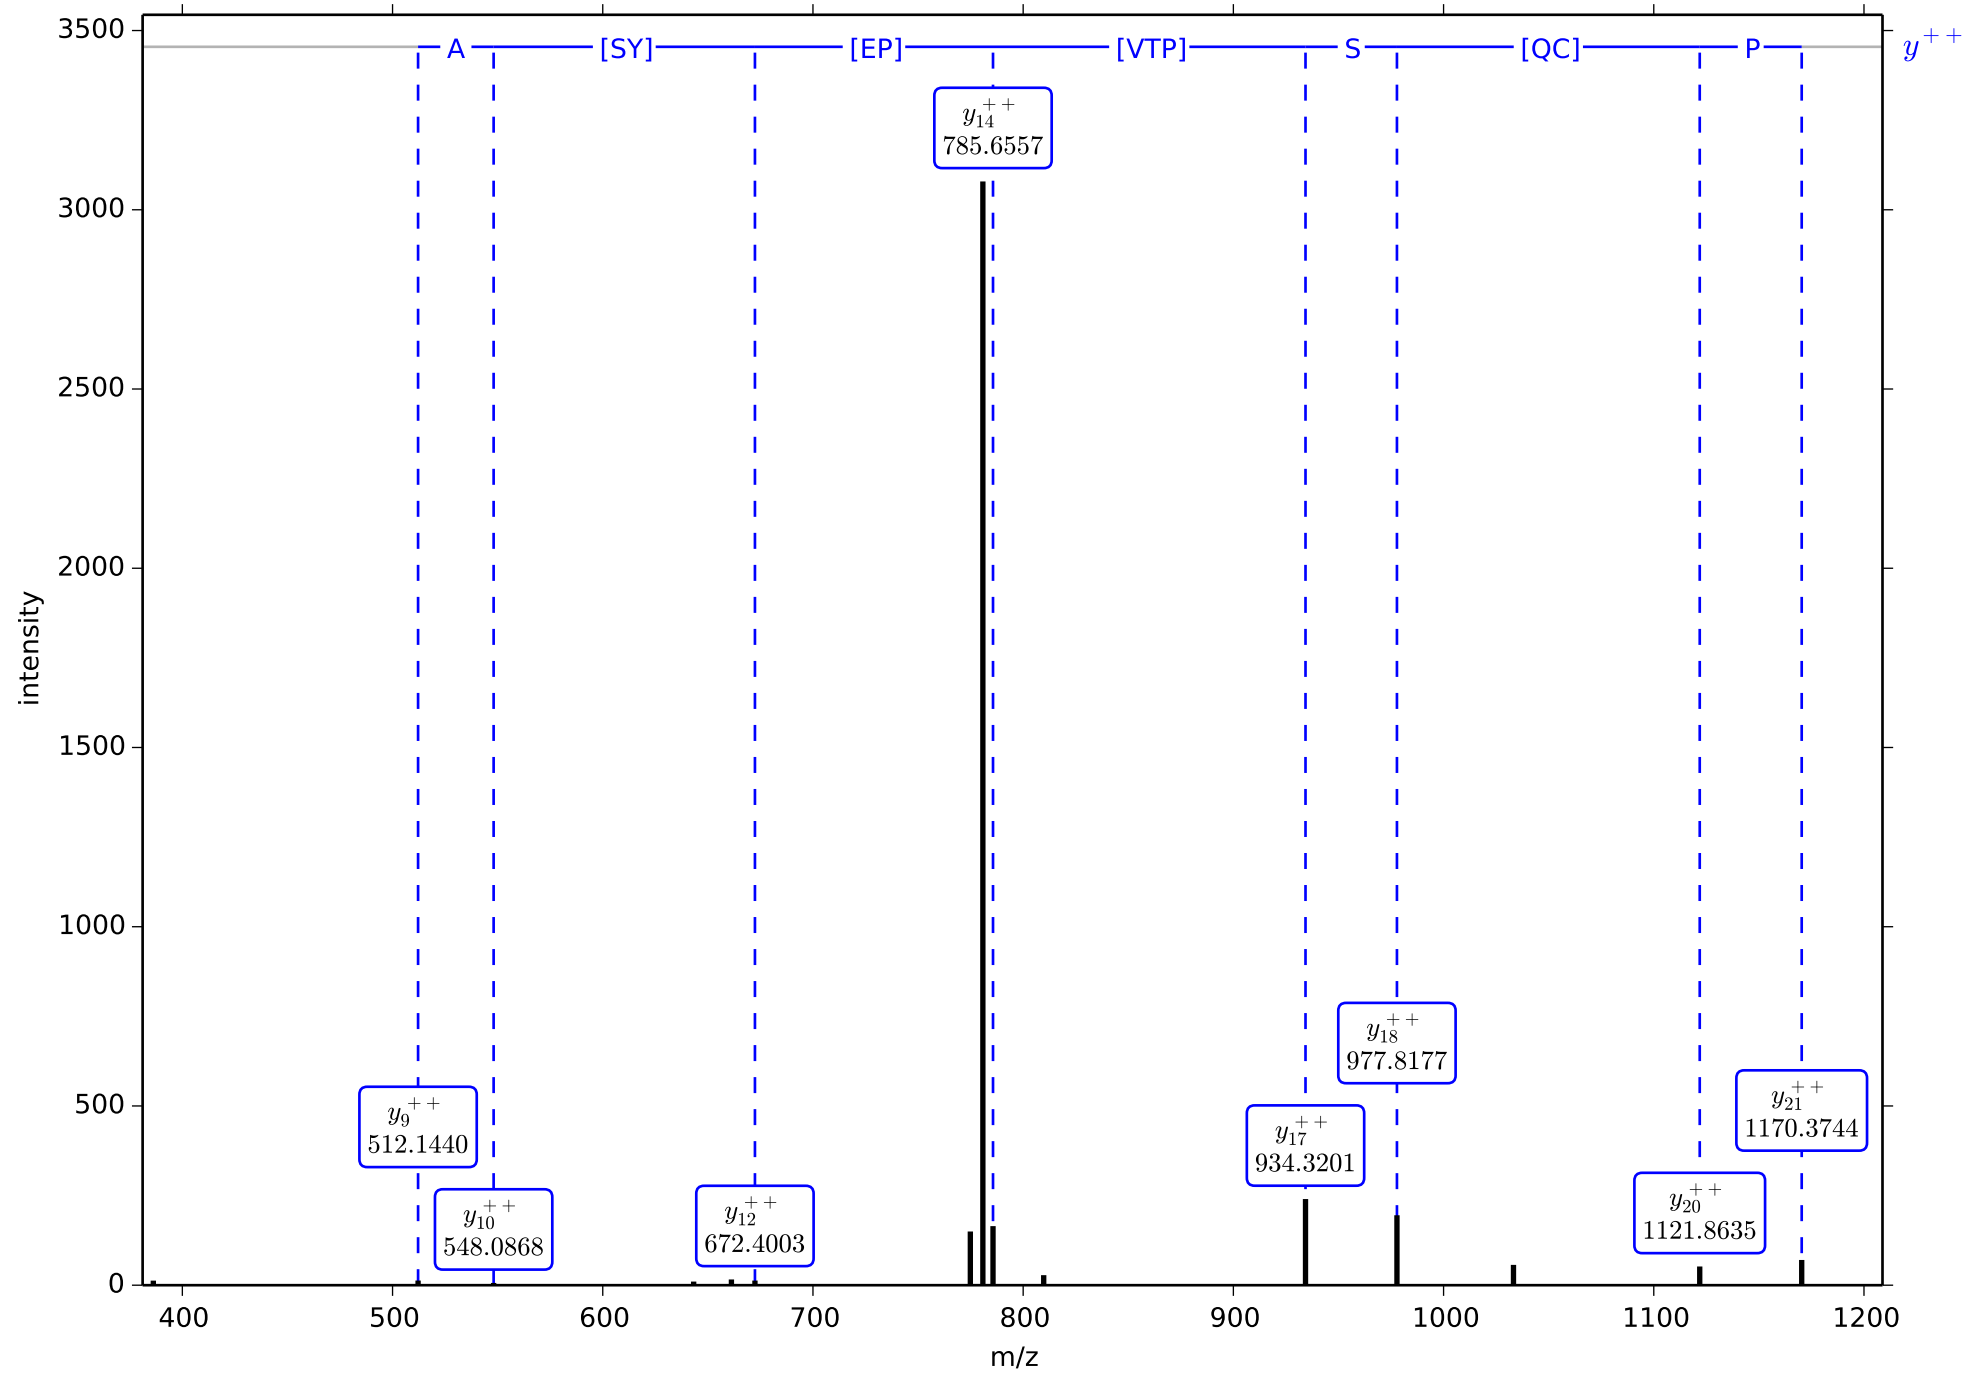

Q9QYR6 : SAPCGSLAFSGDR

parent: 662.798350,2+

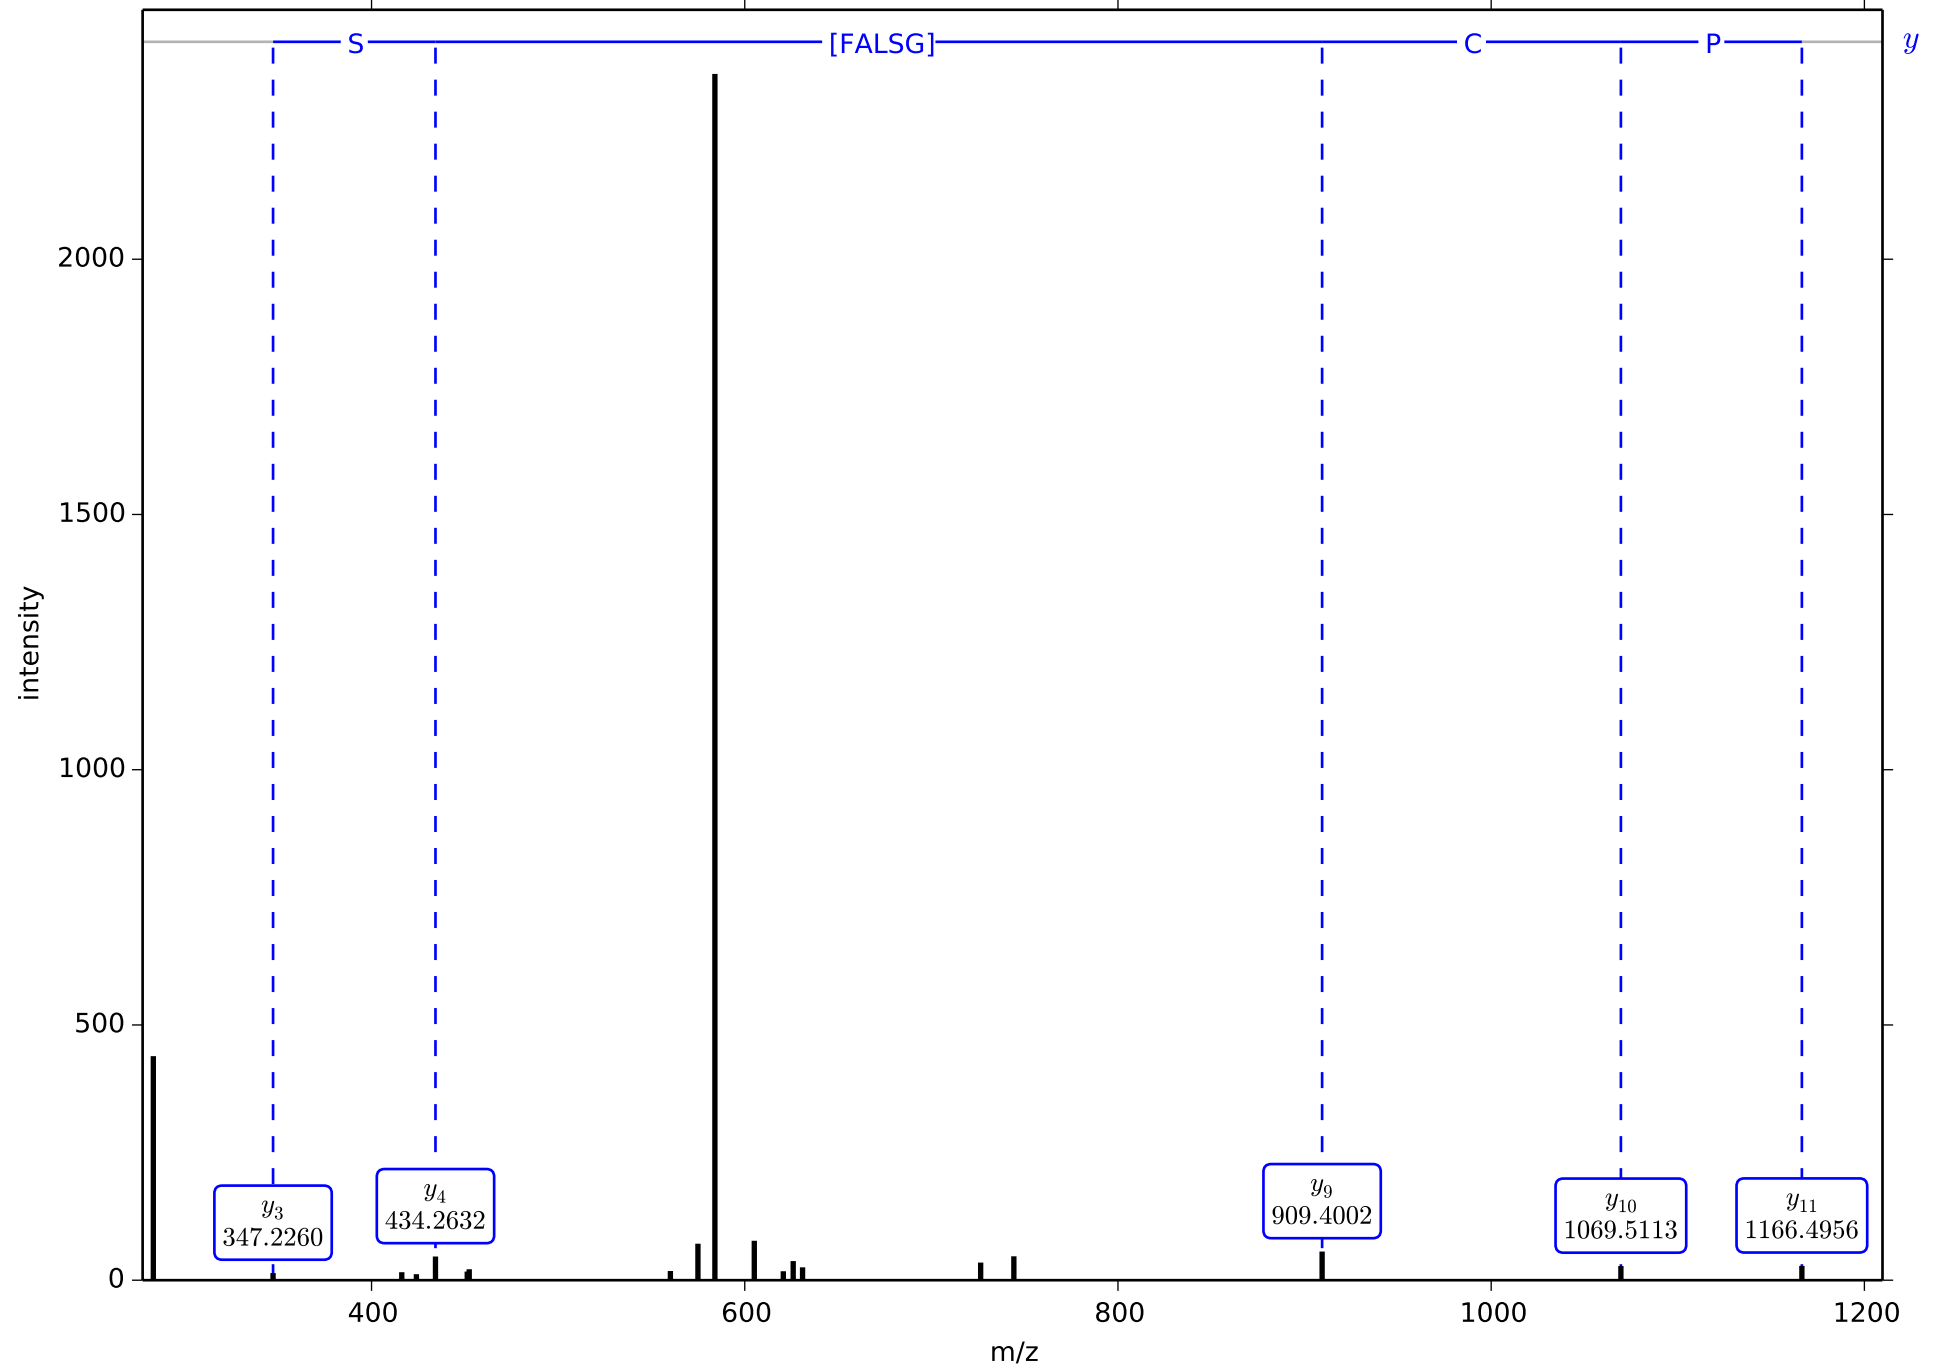

Q8BY89 : VVDDTACPLL

parent: 629.826900,2+

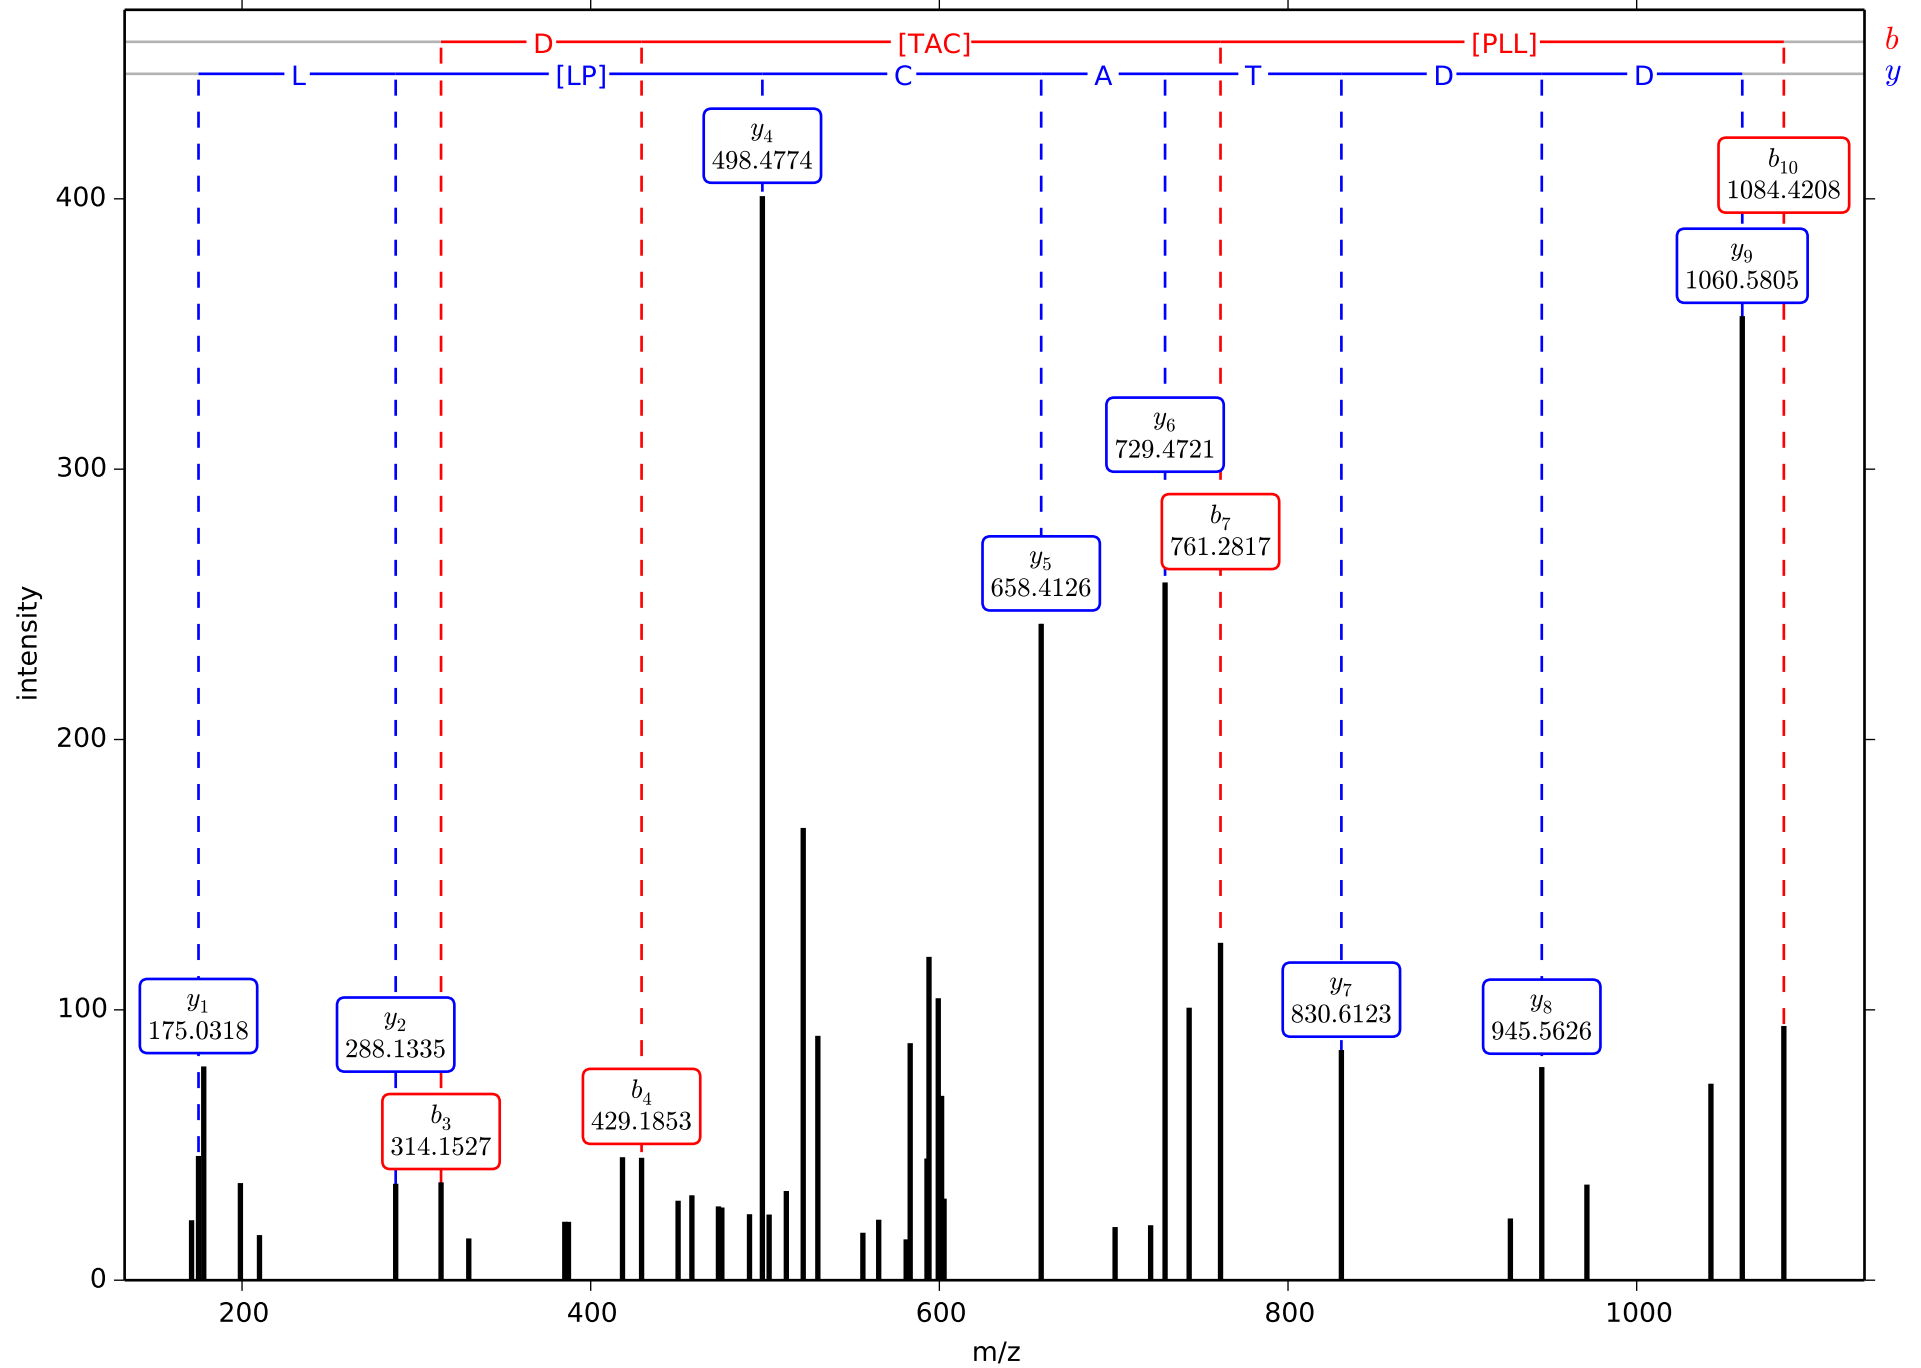

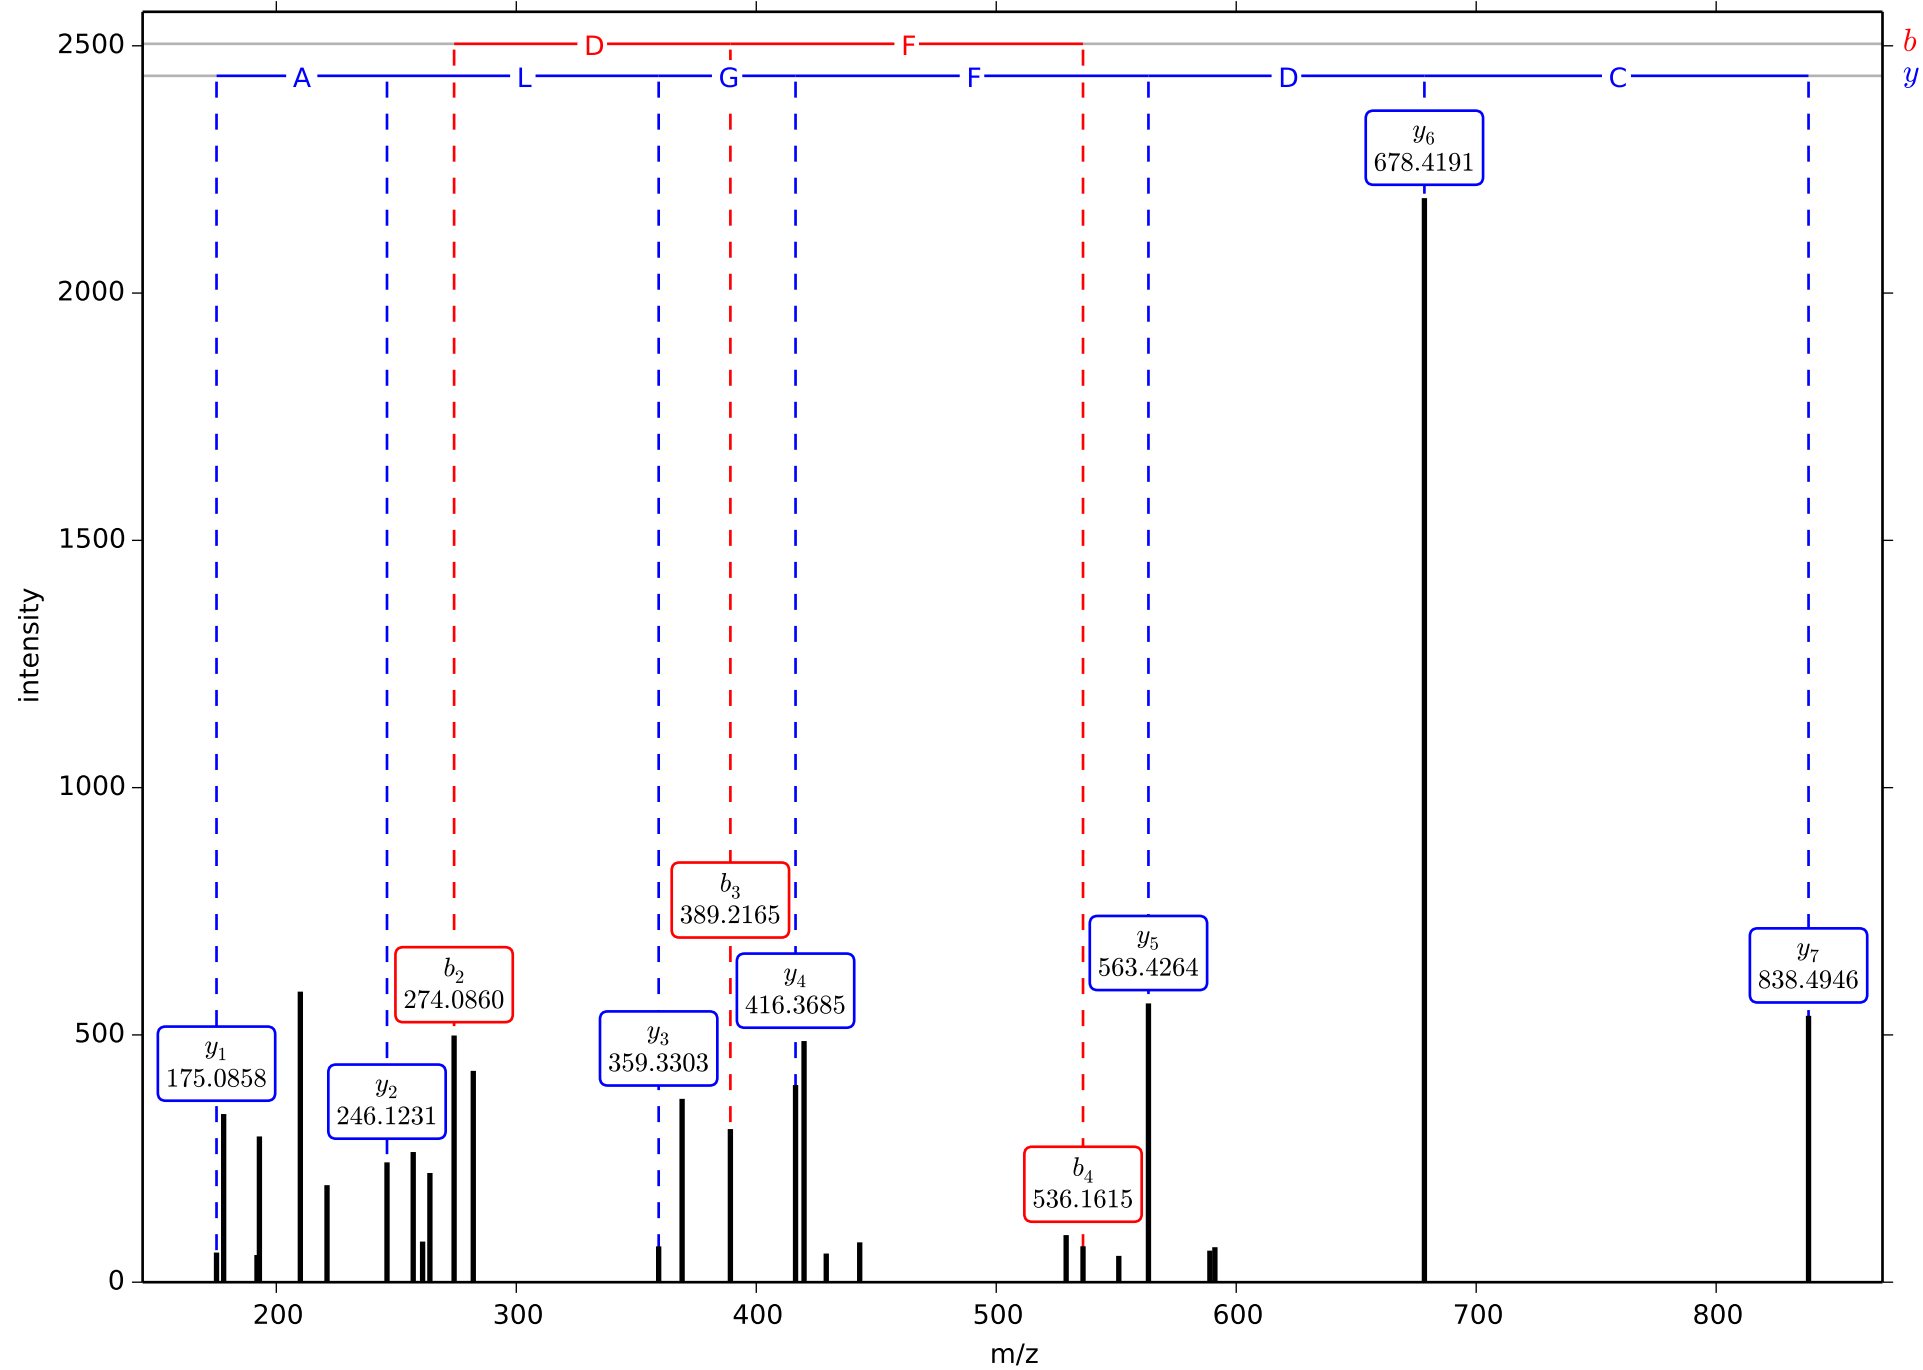



O54991 : YNTPGFSGCLSGVR

parent: 757.850800,2+

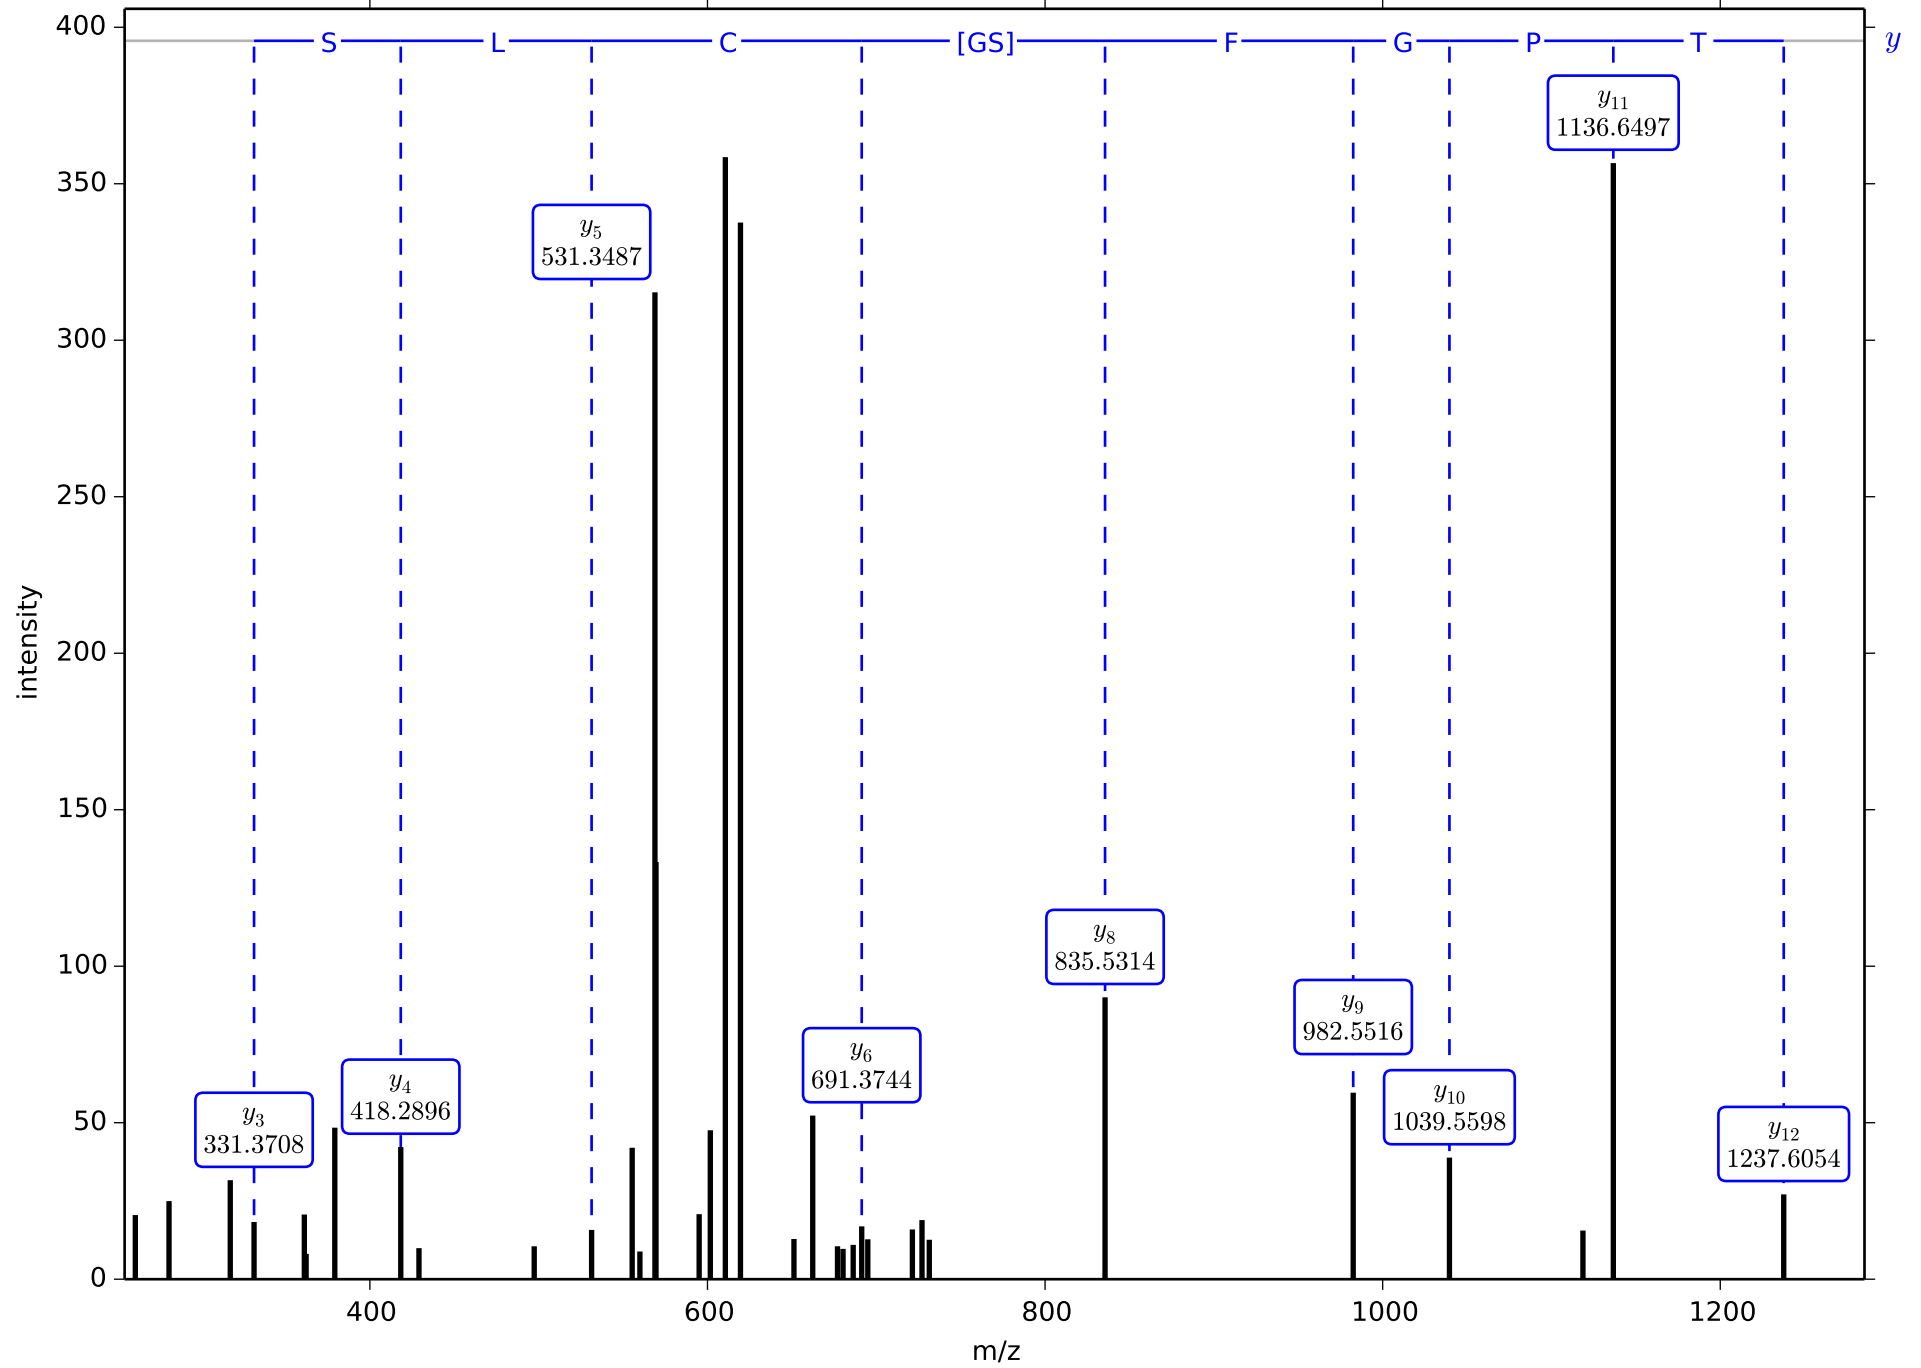

Q8BPN8 : VINLSQYGPACFGQE HAR

parent: 682.999420,3+

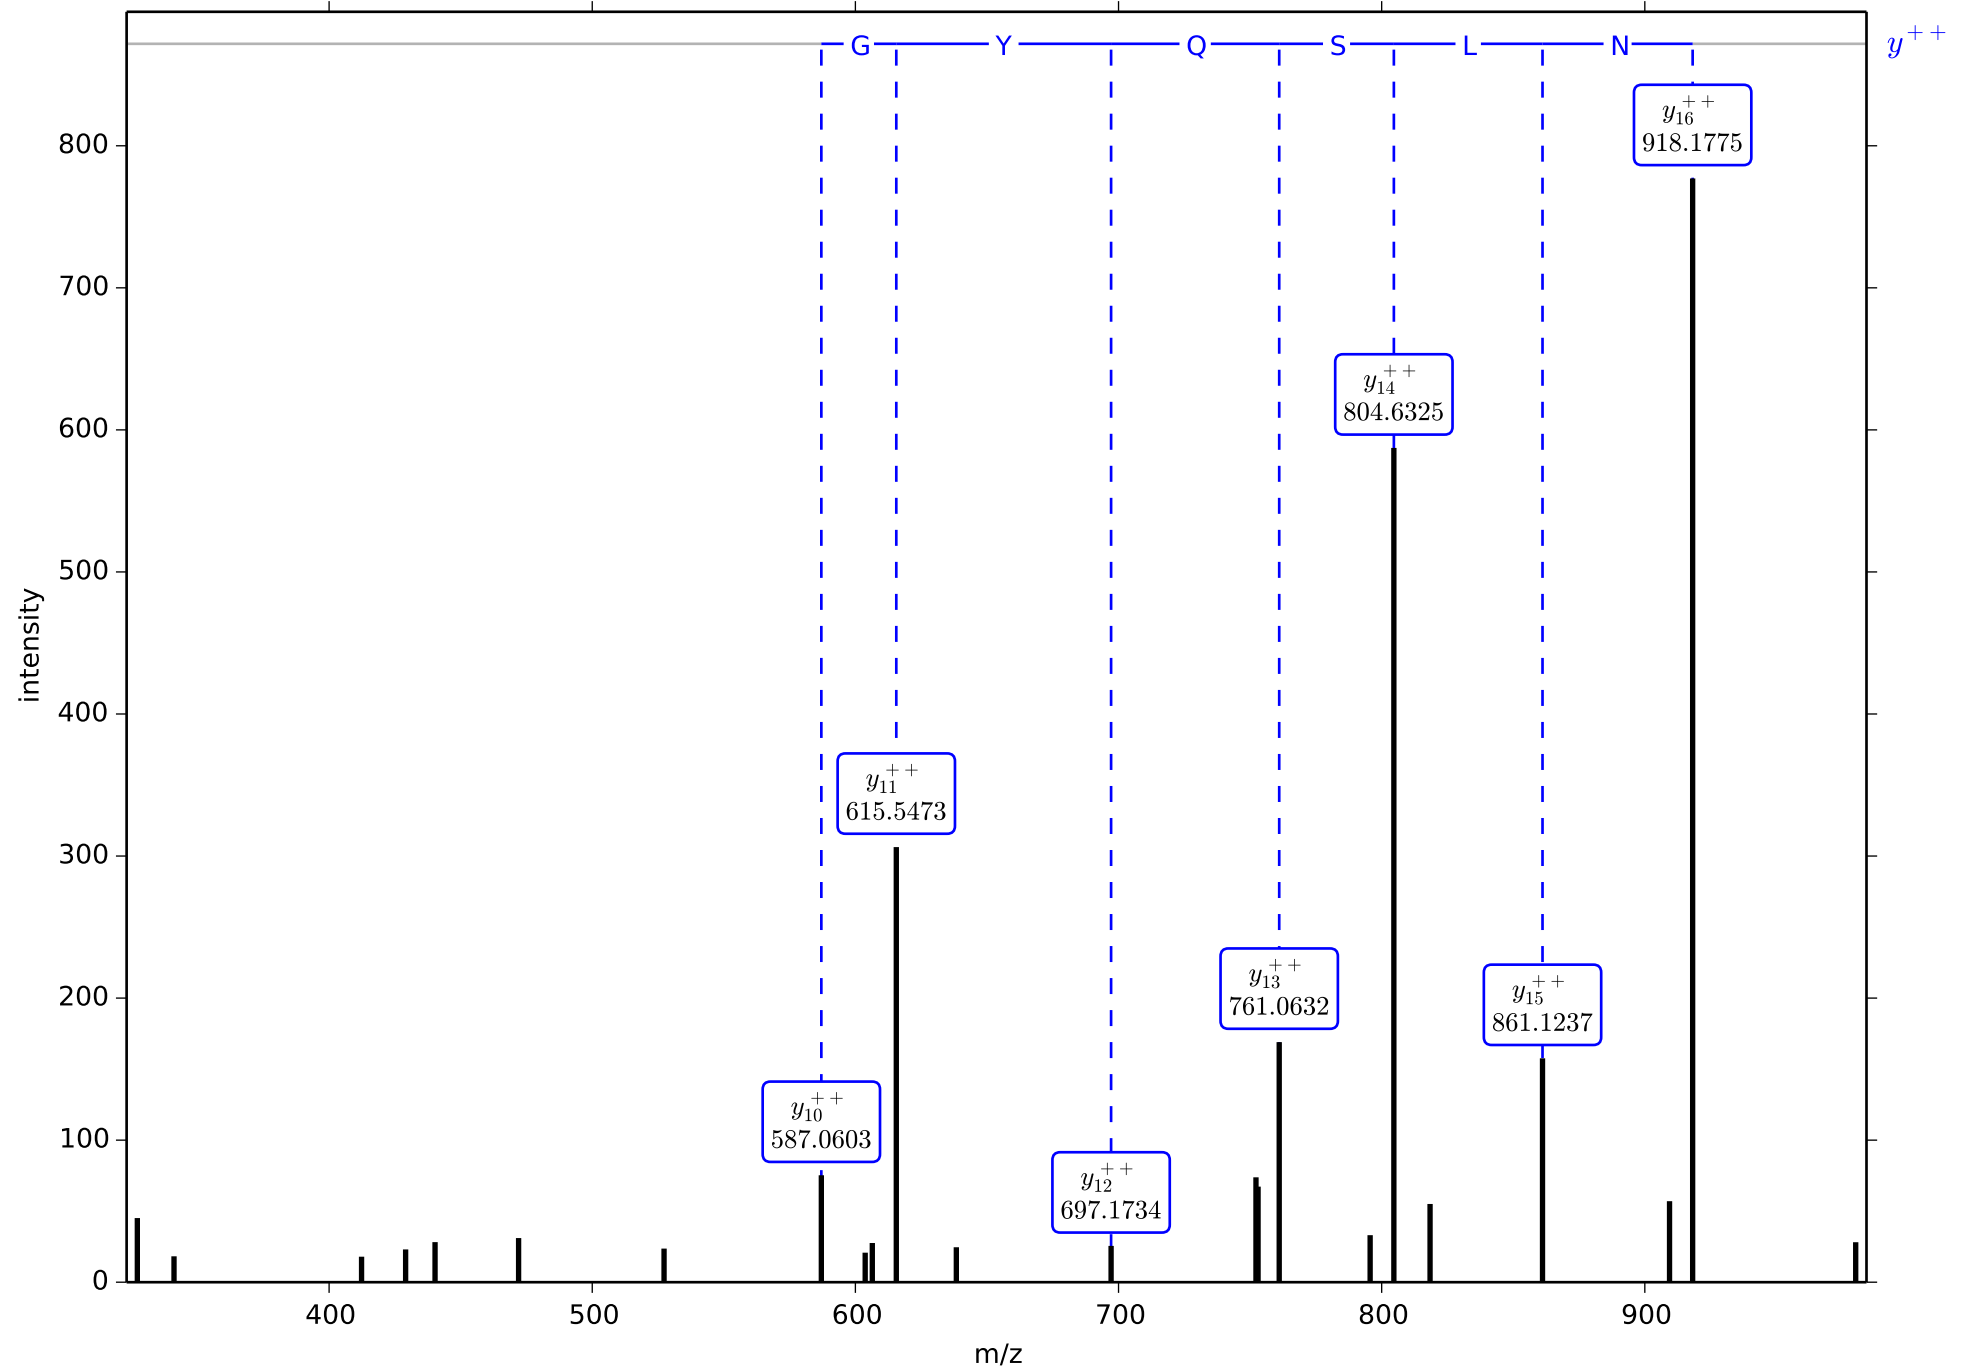

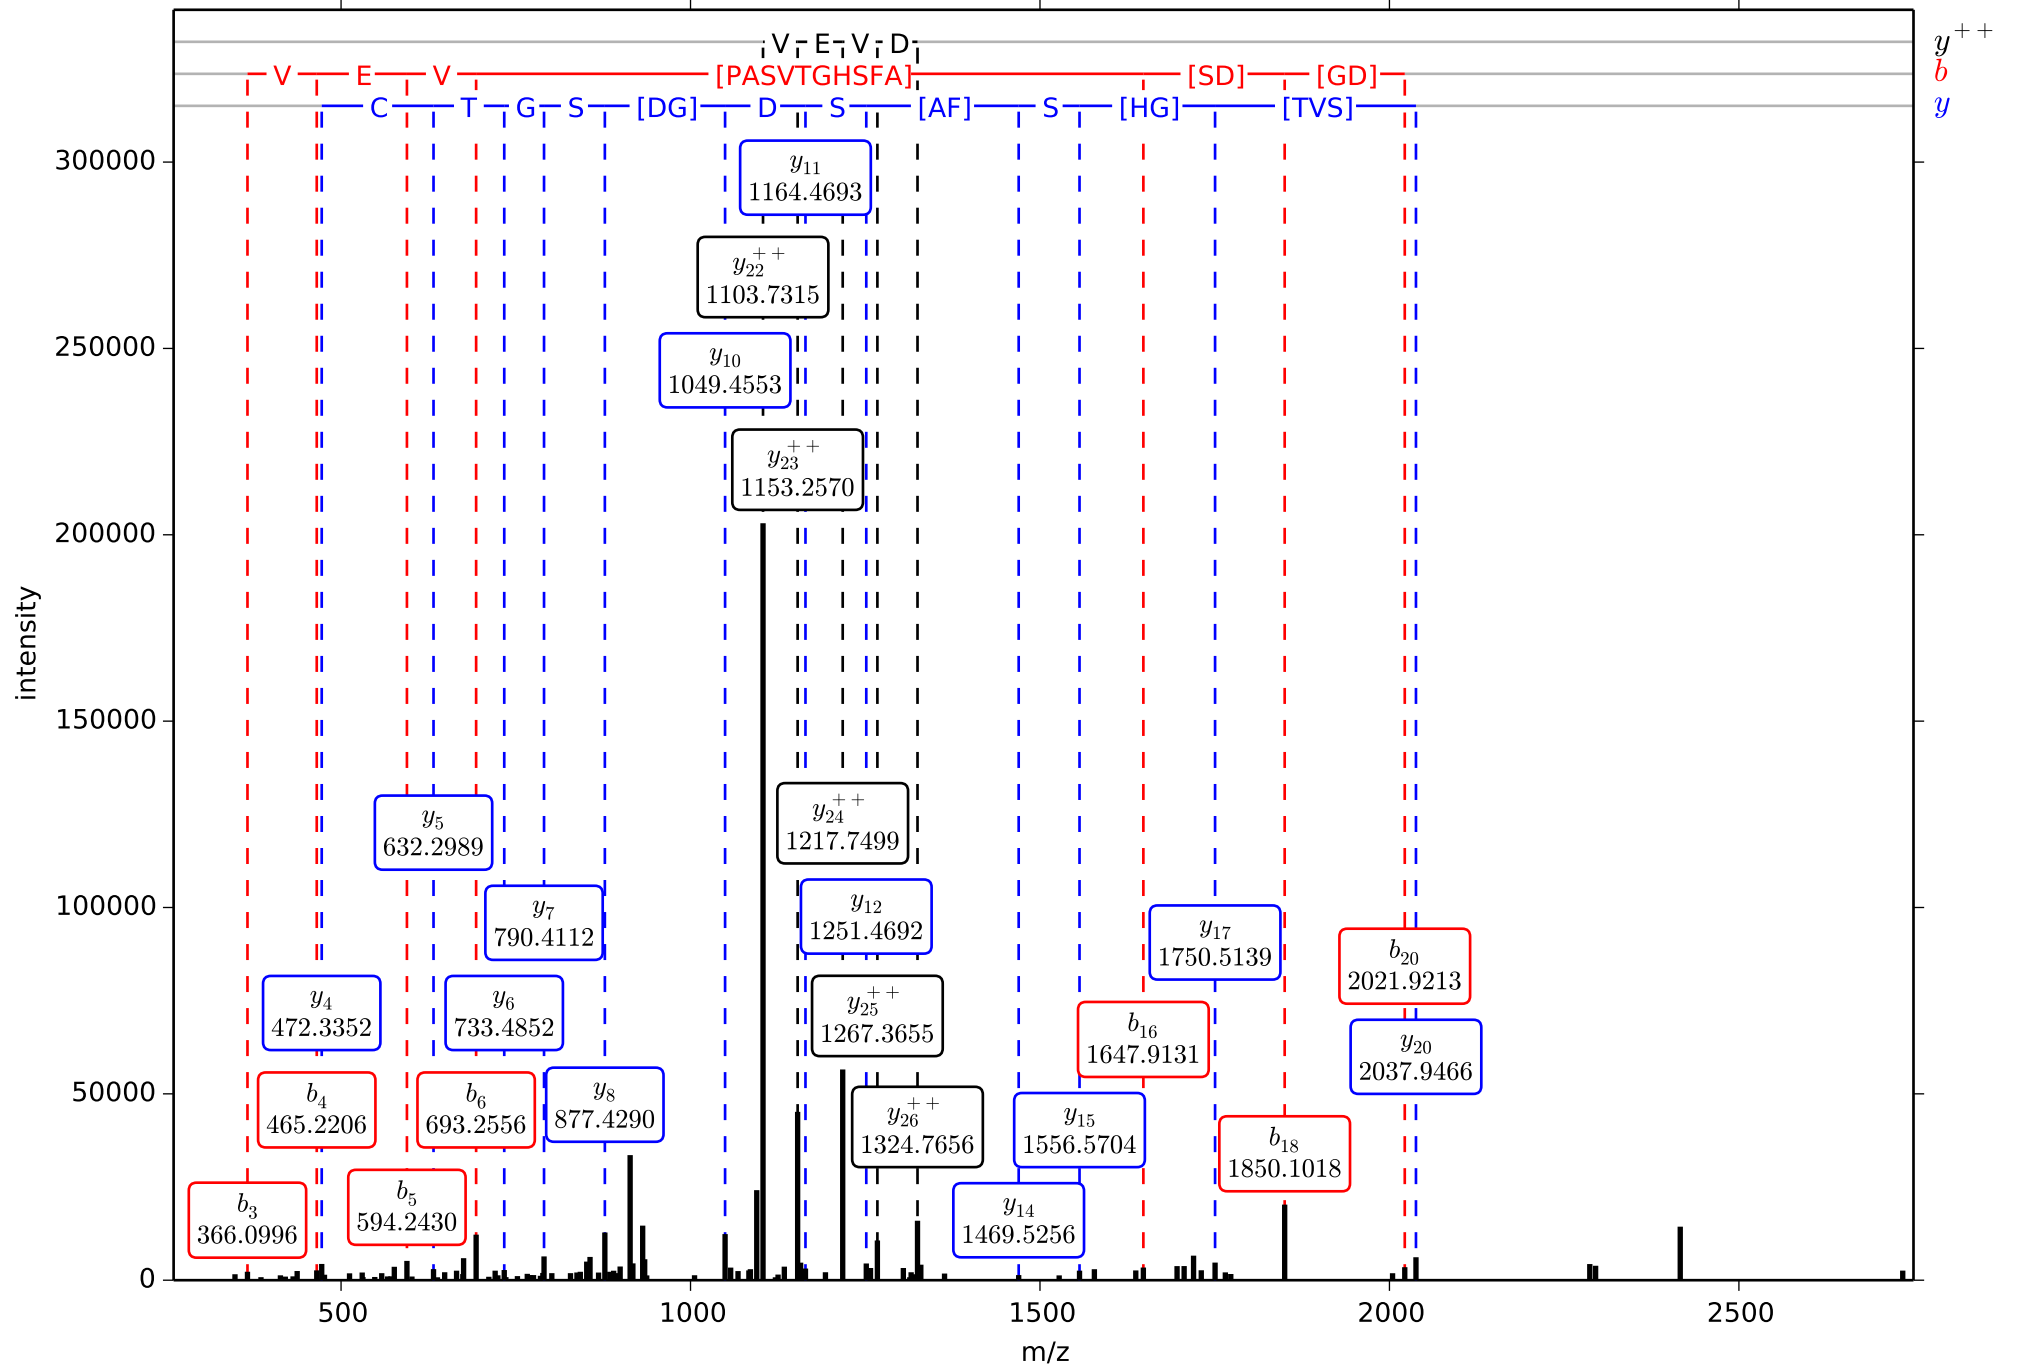

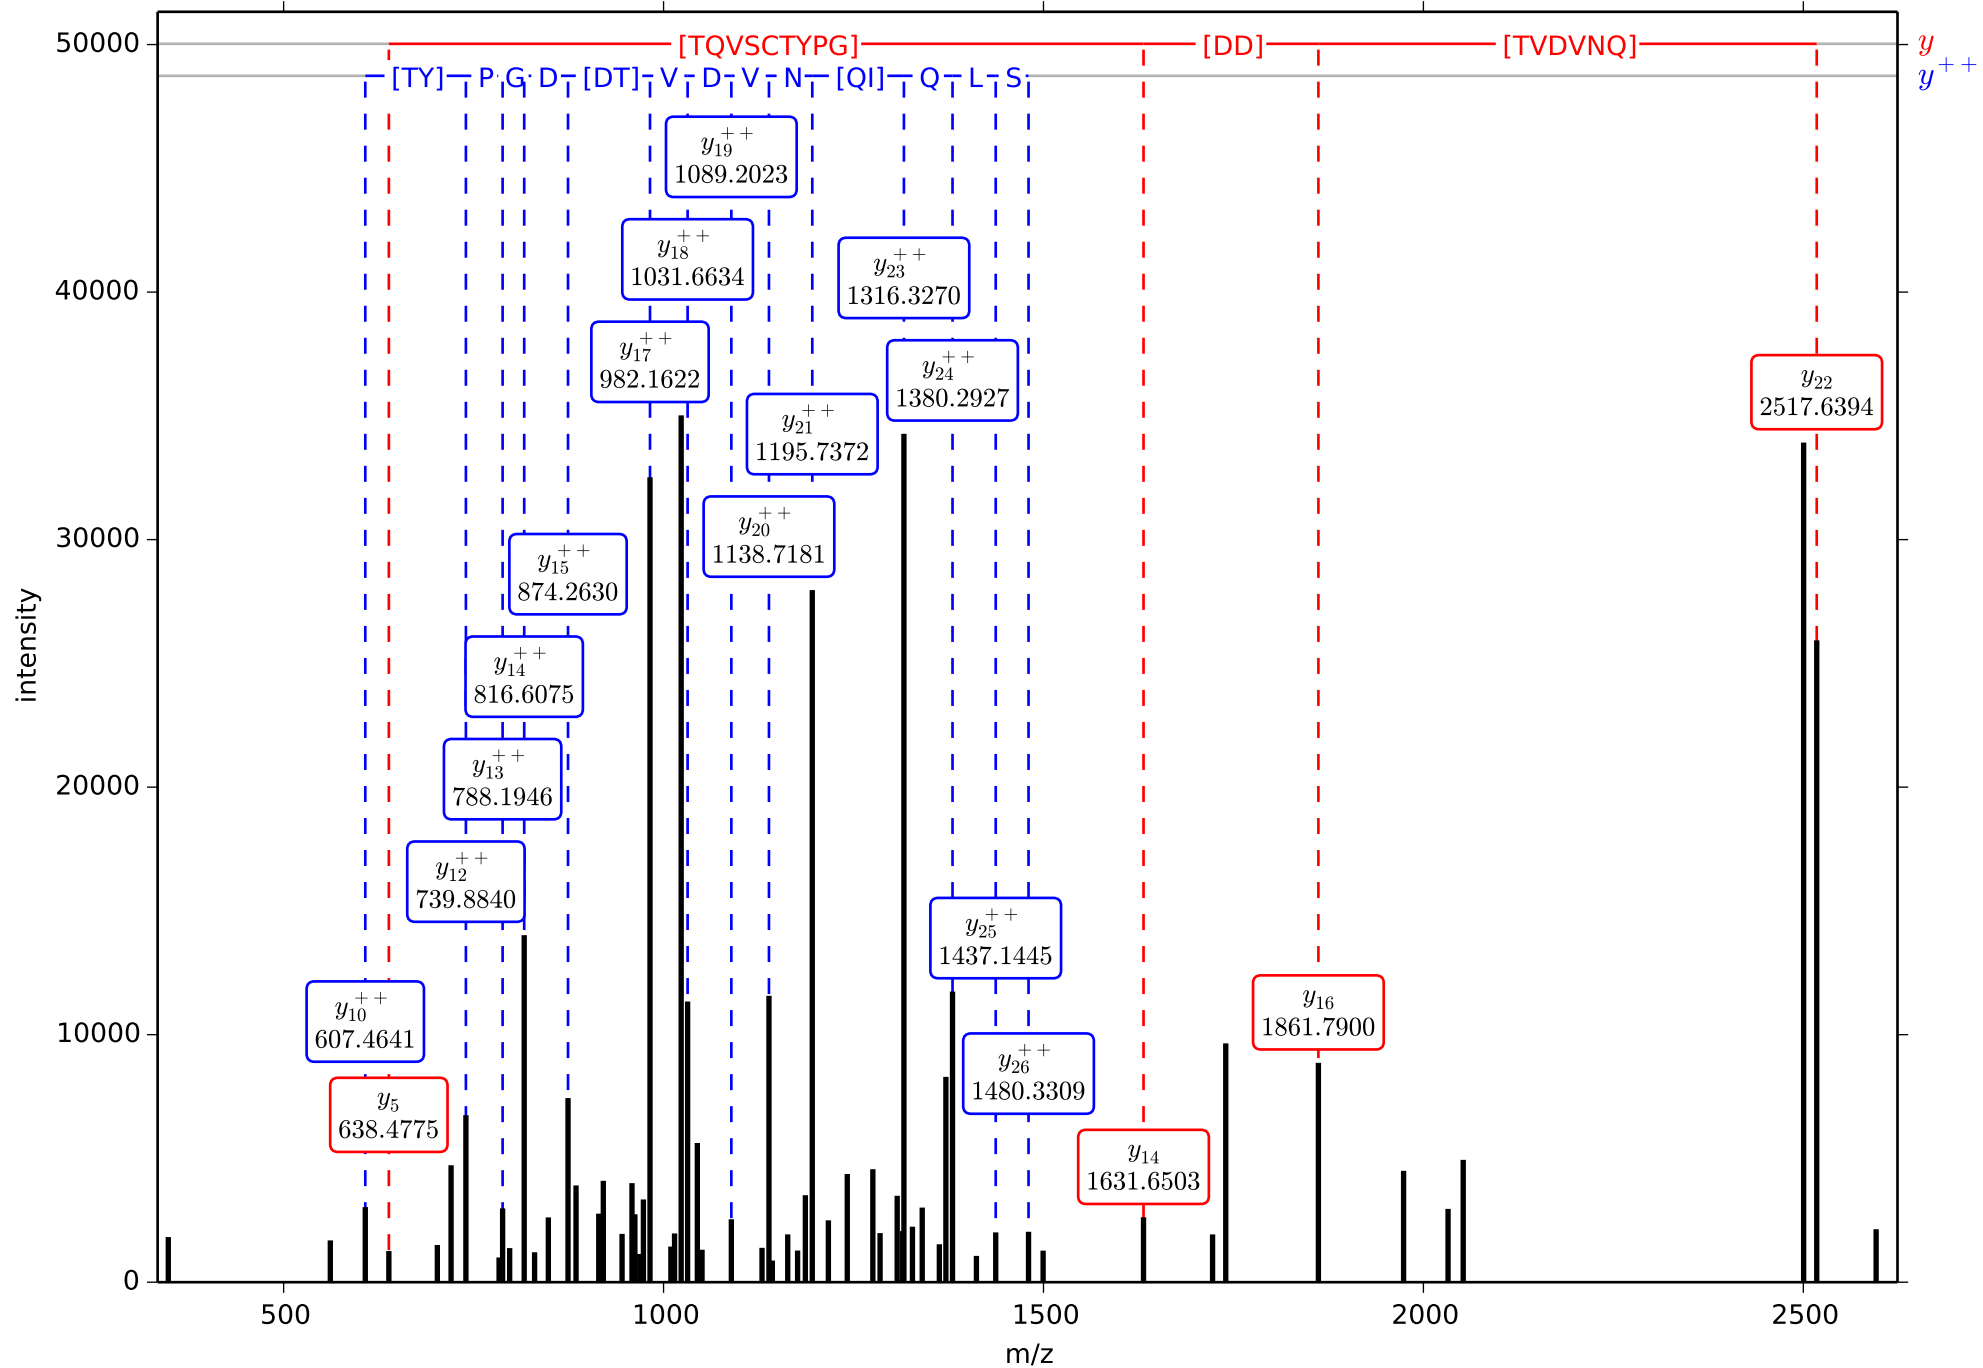

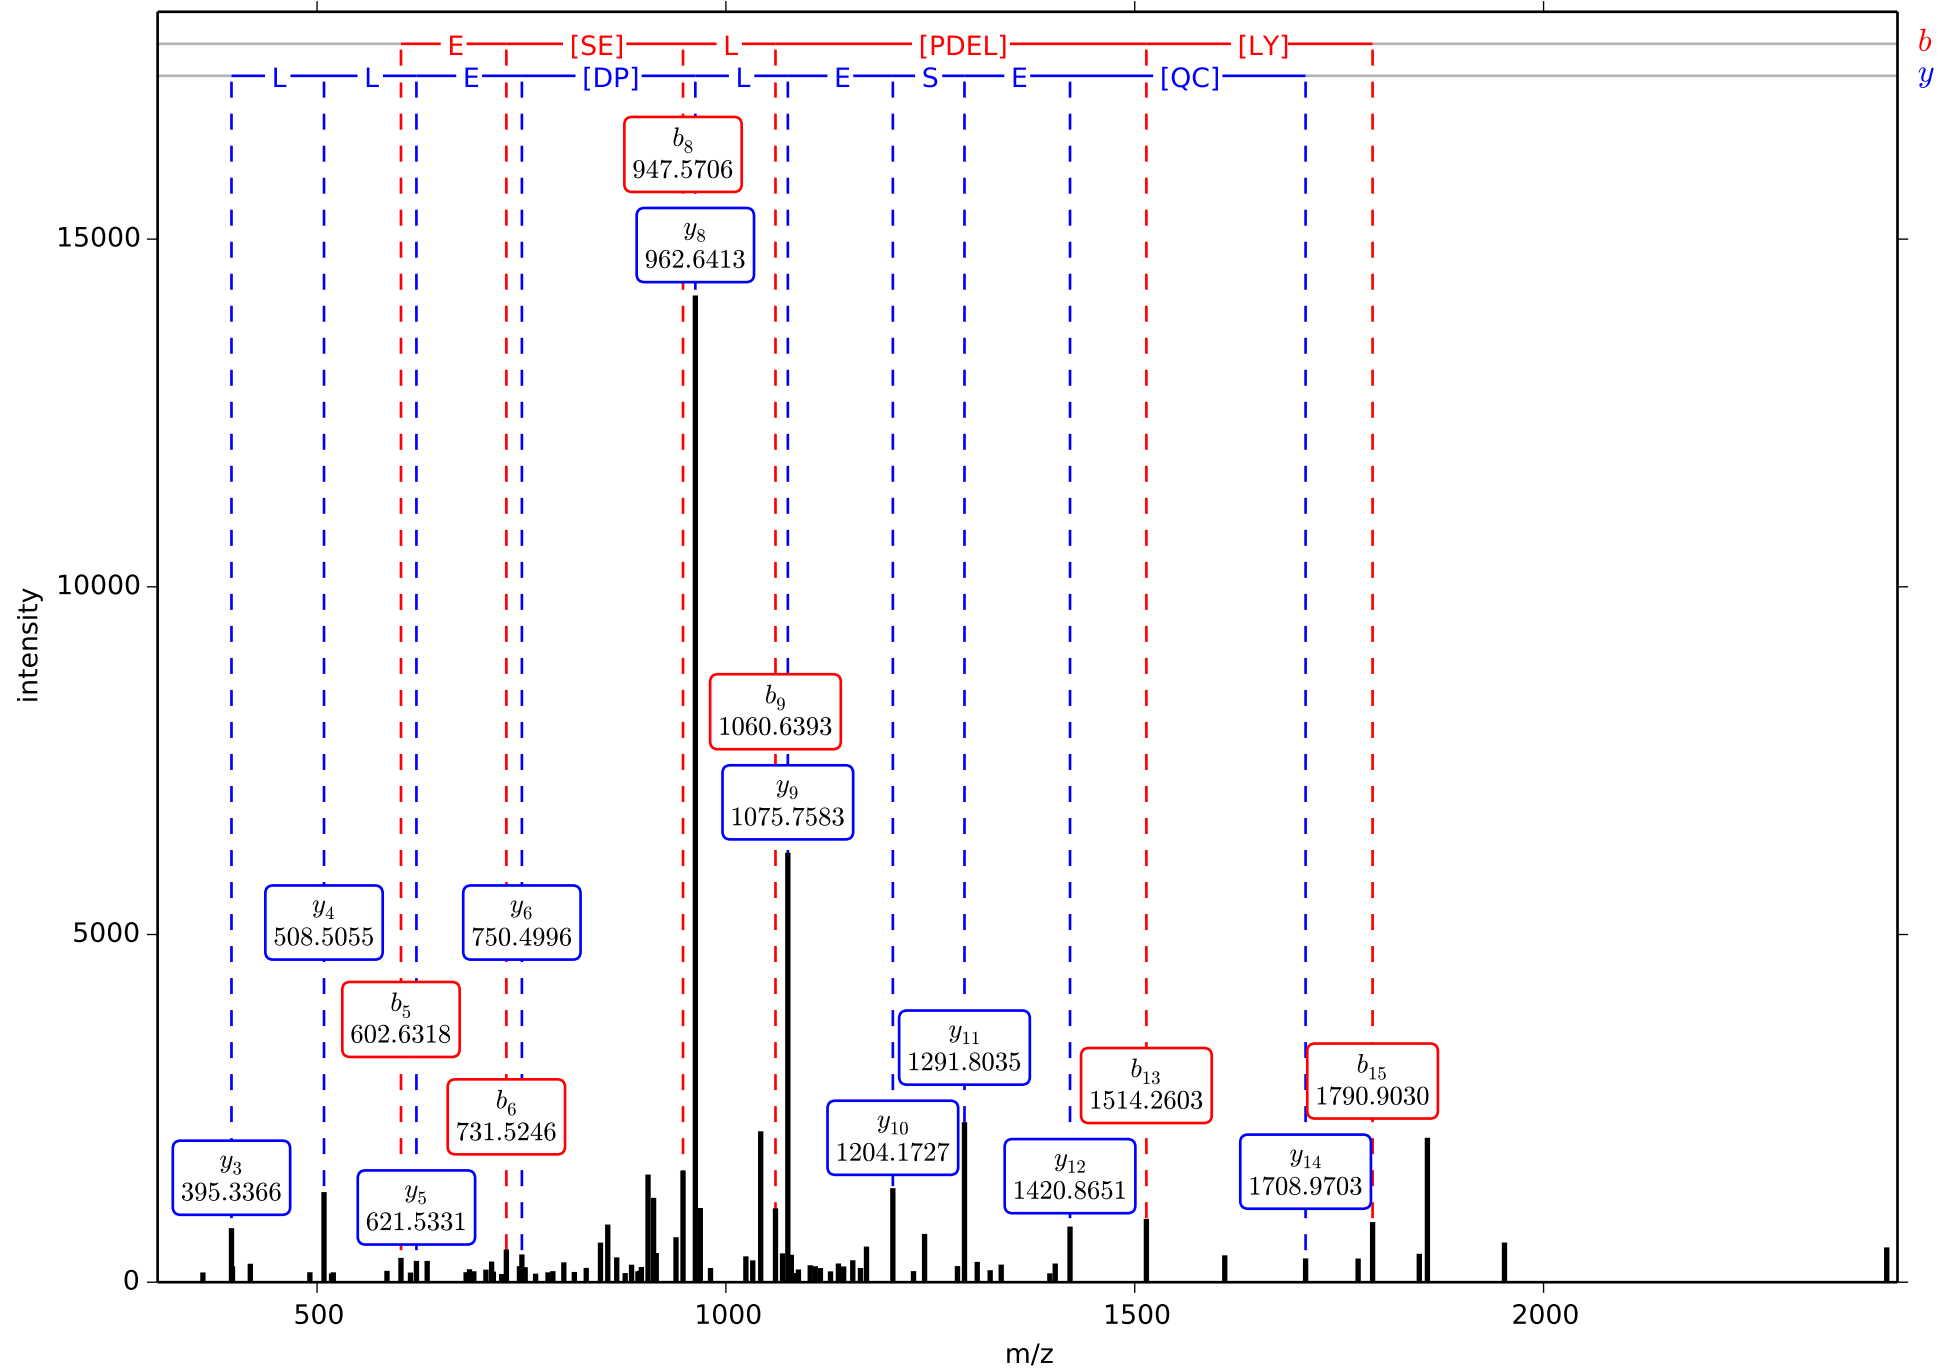

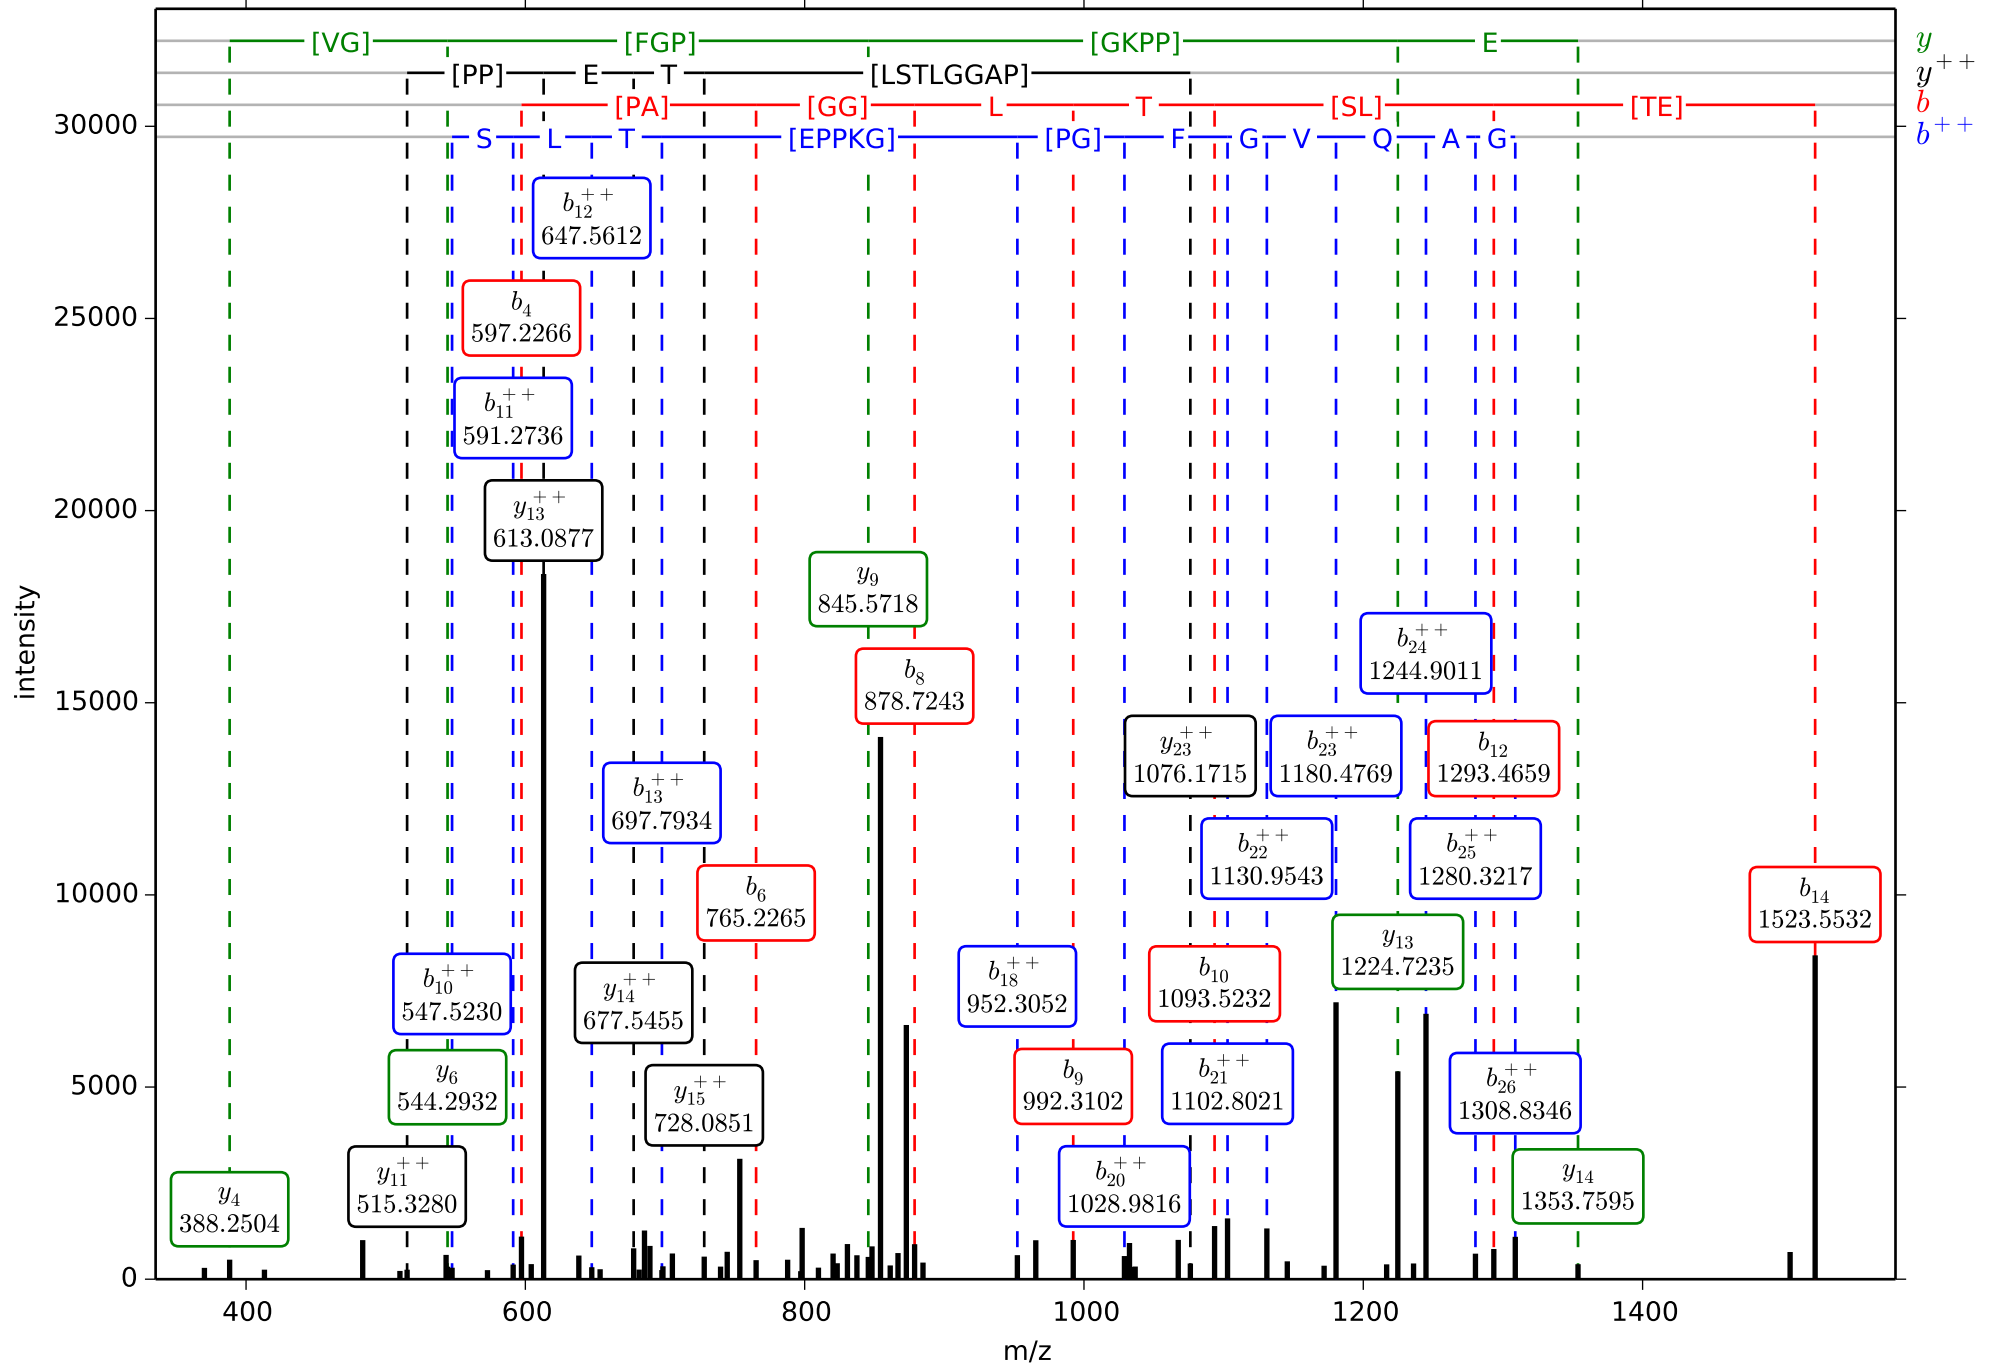

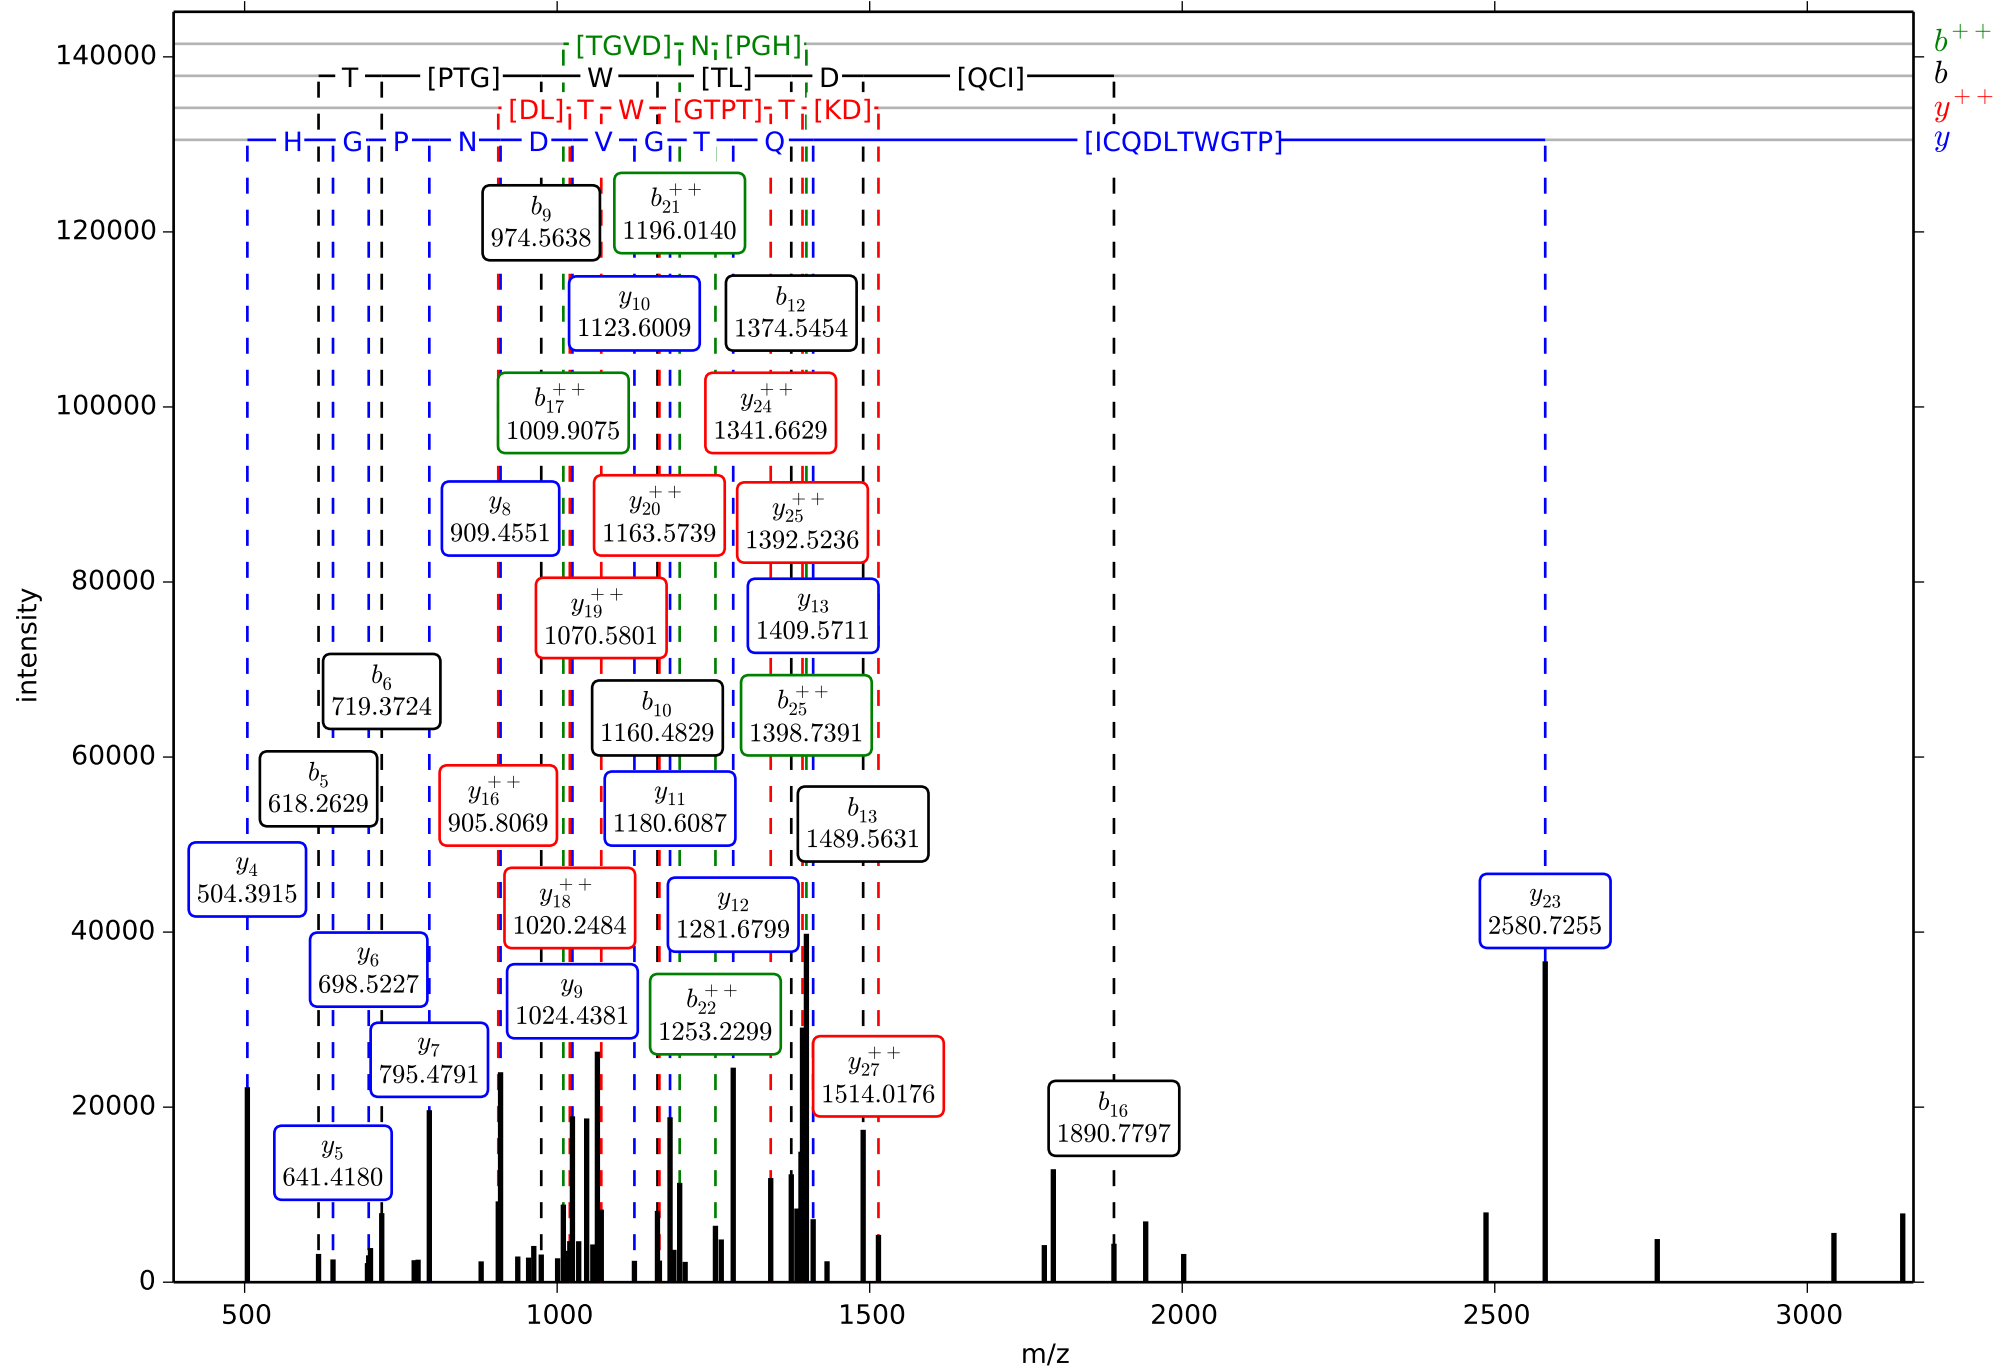

Q8K3J1 : LCEAICPAQAITIEAEPR

parent: 1021.519100,2+

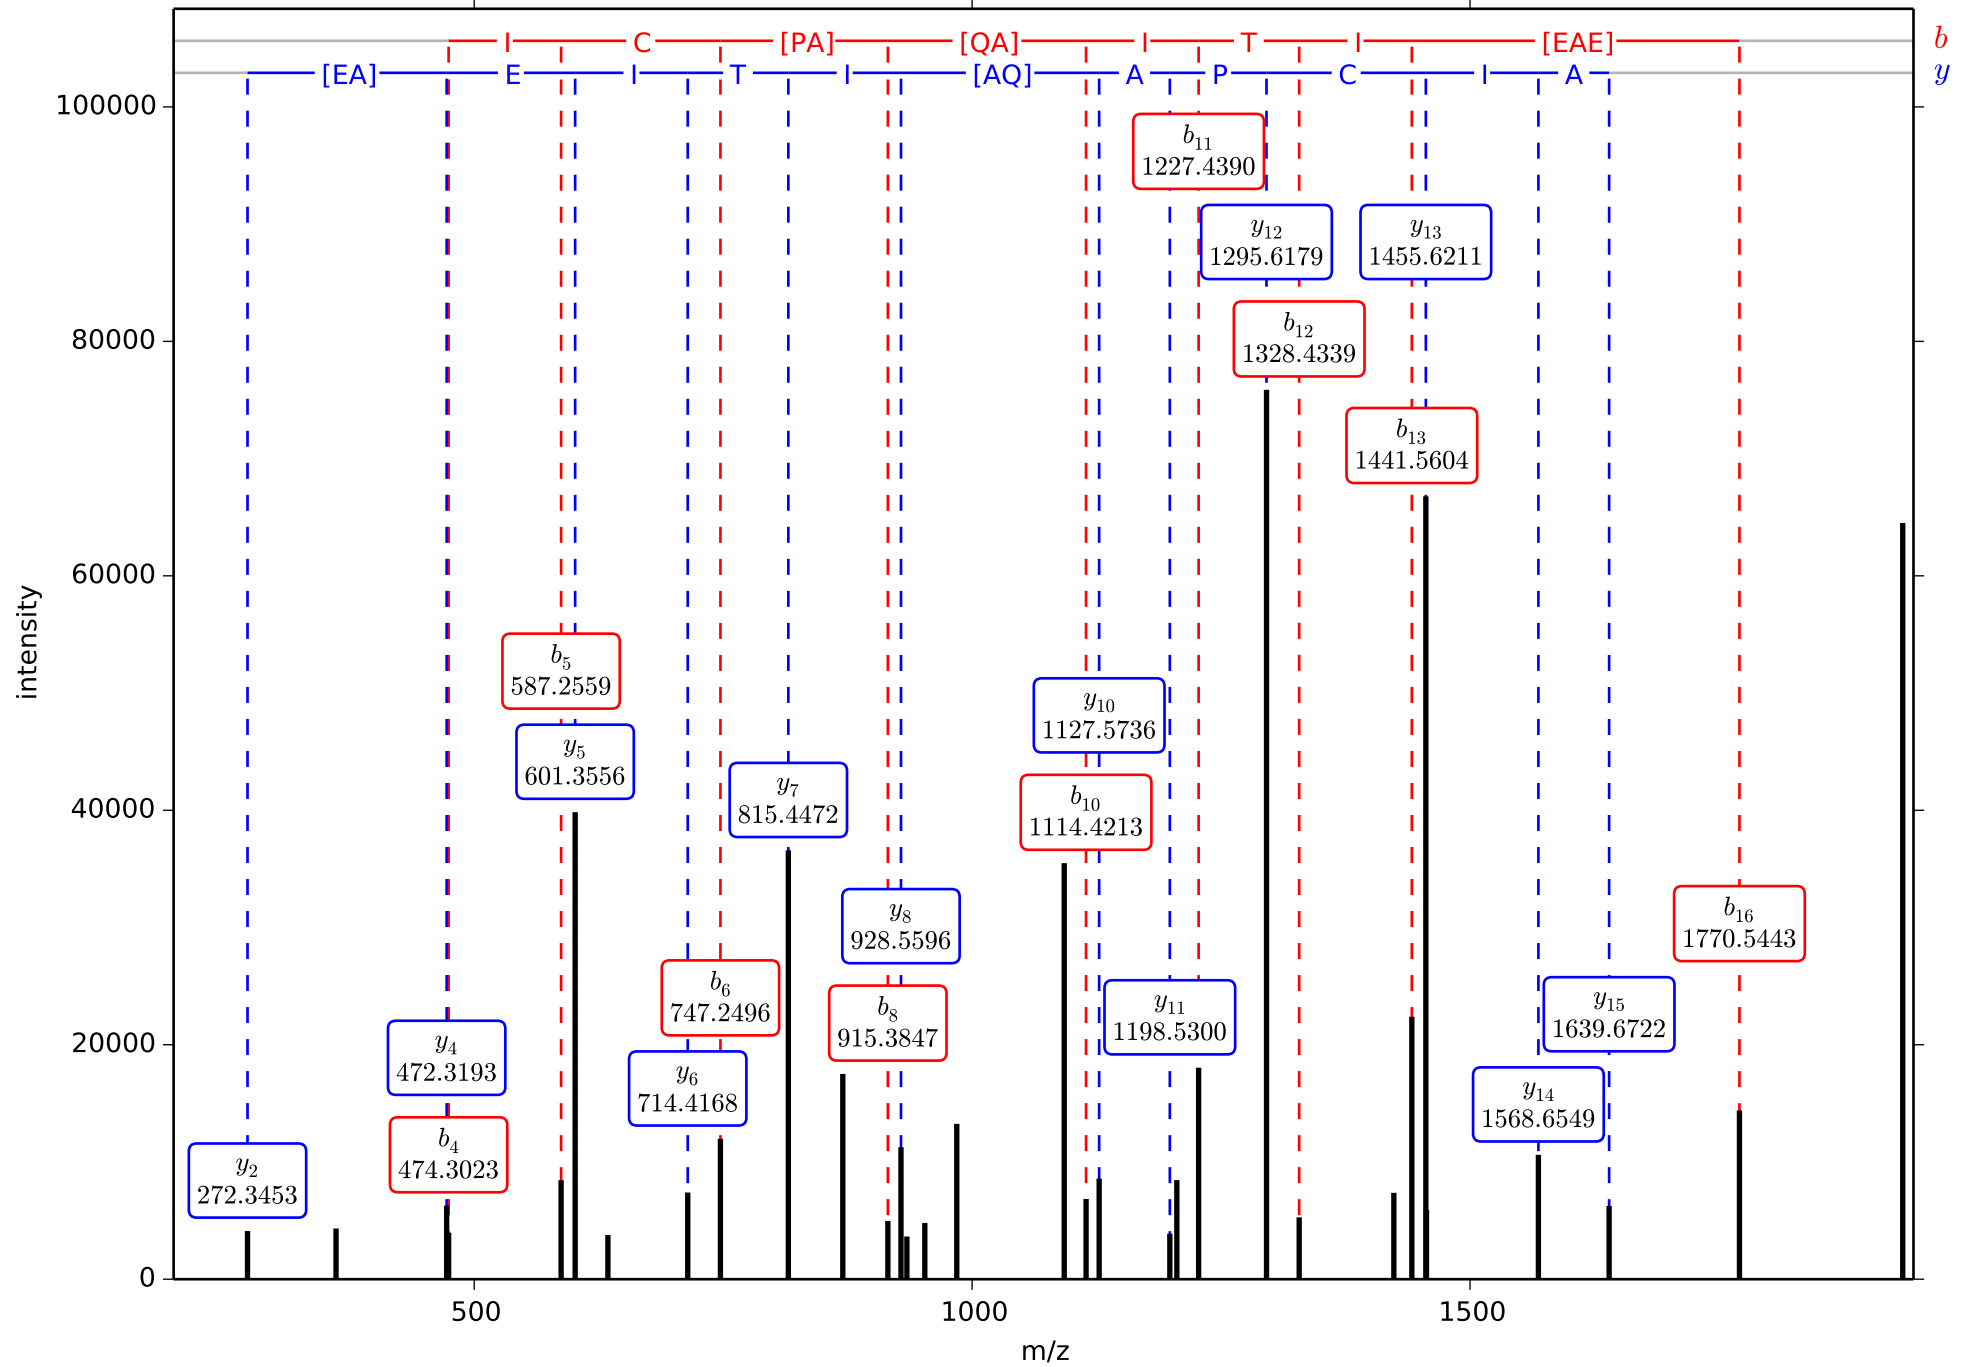



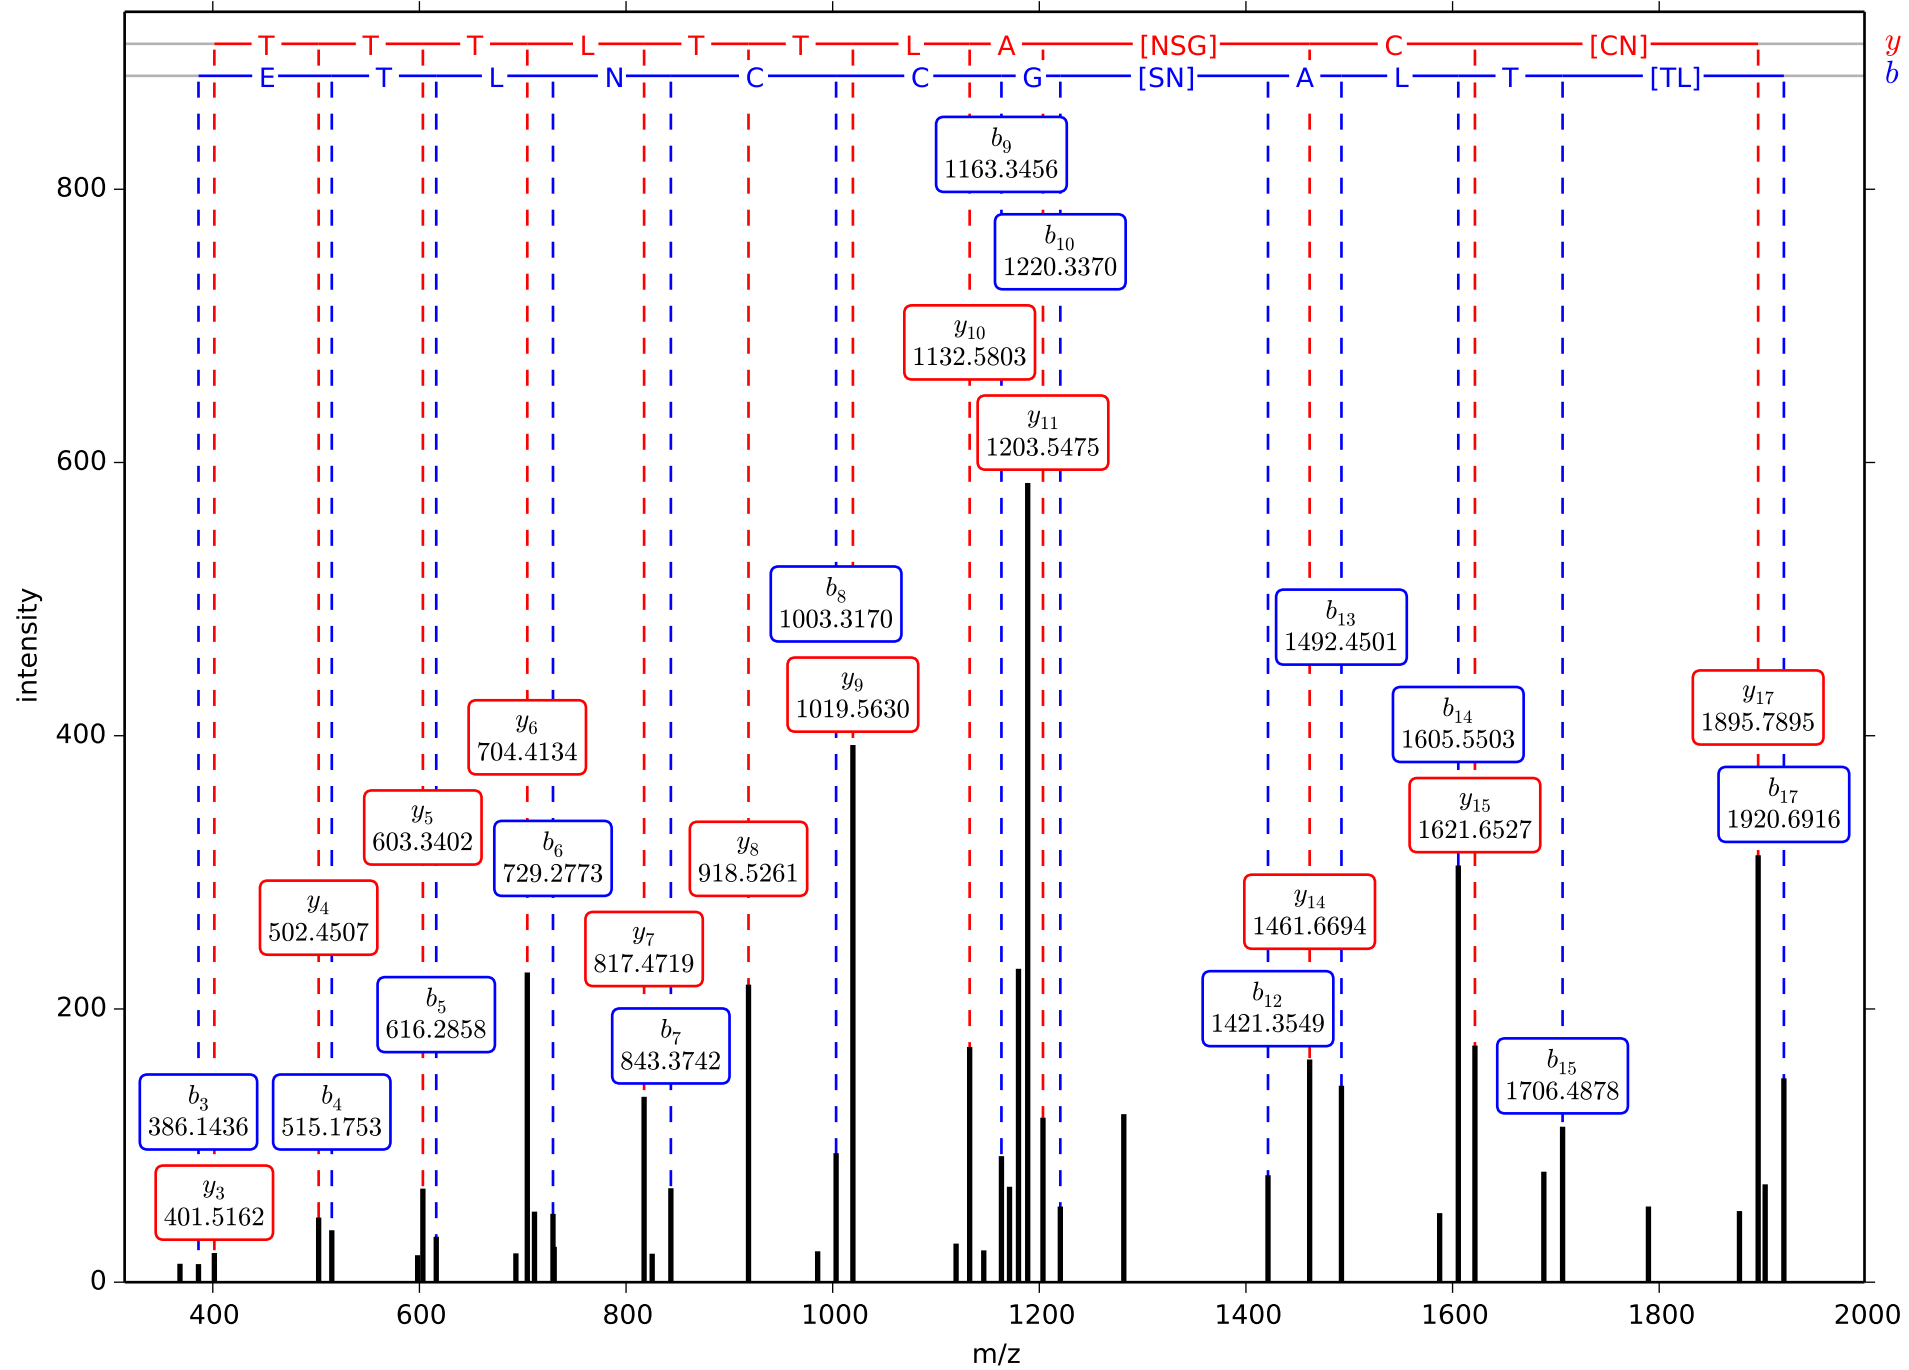

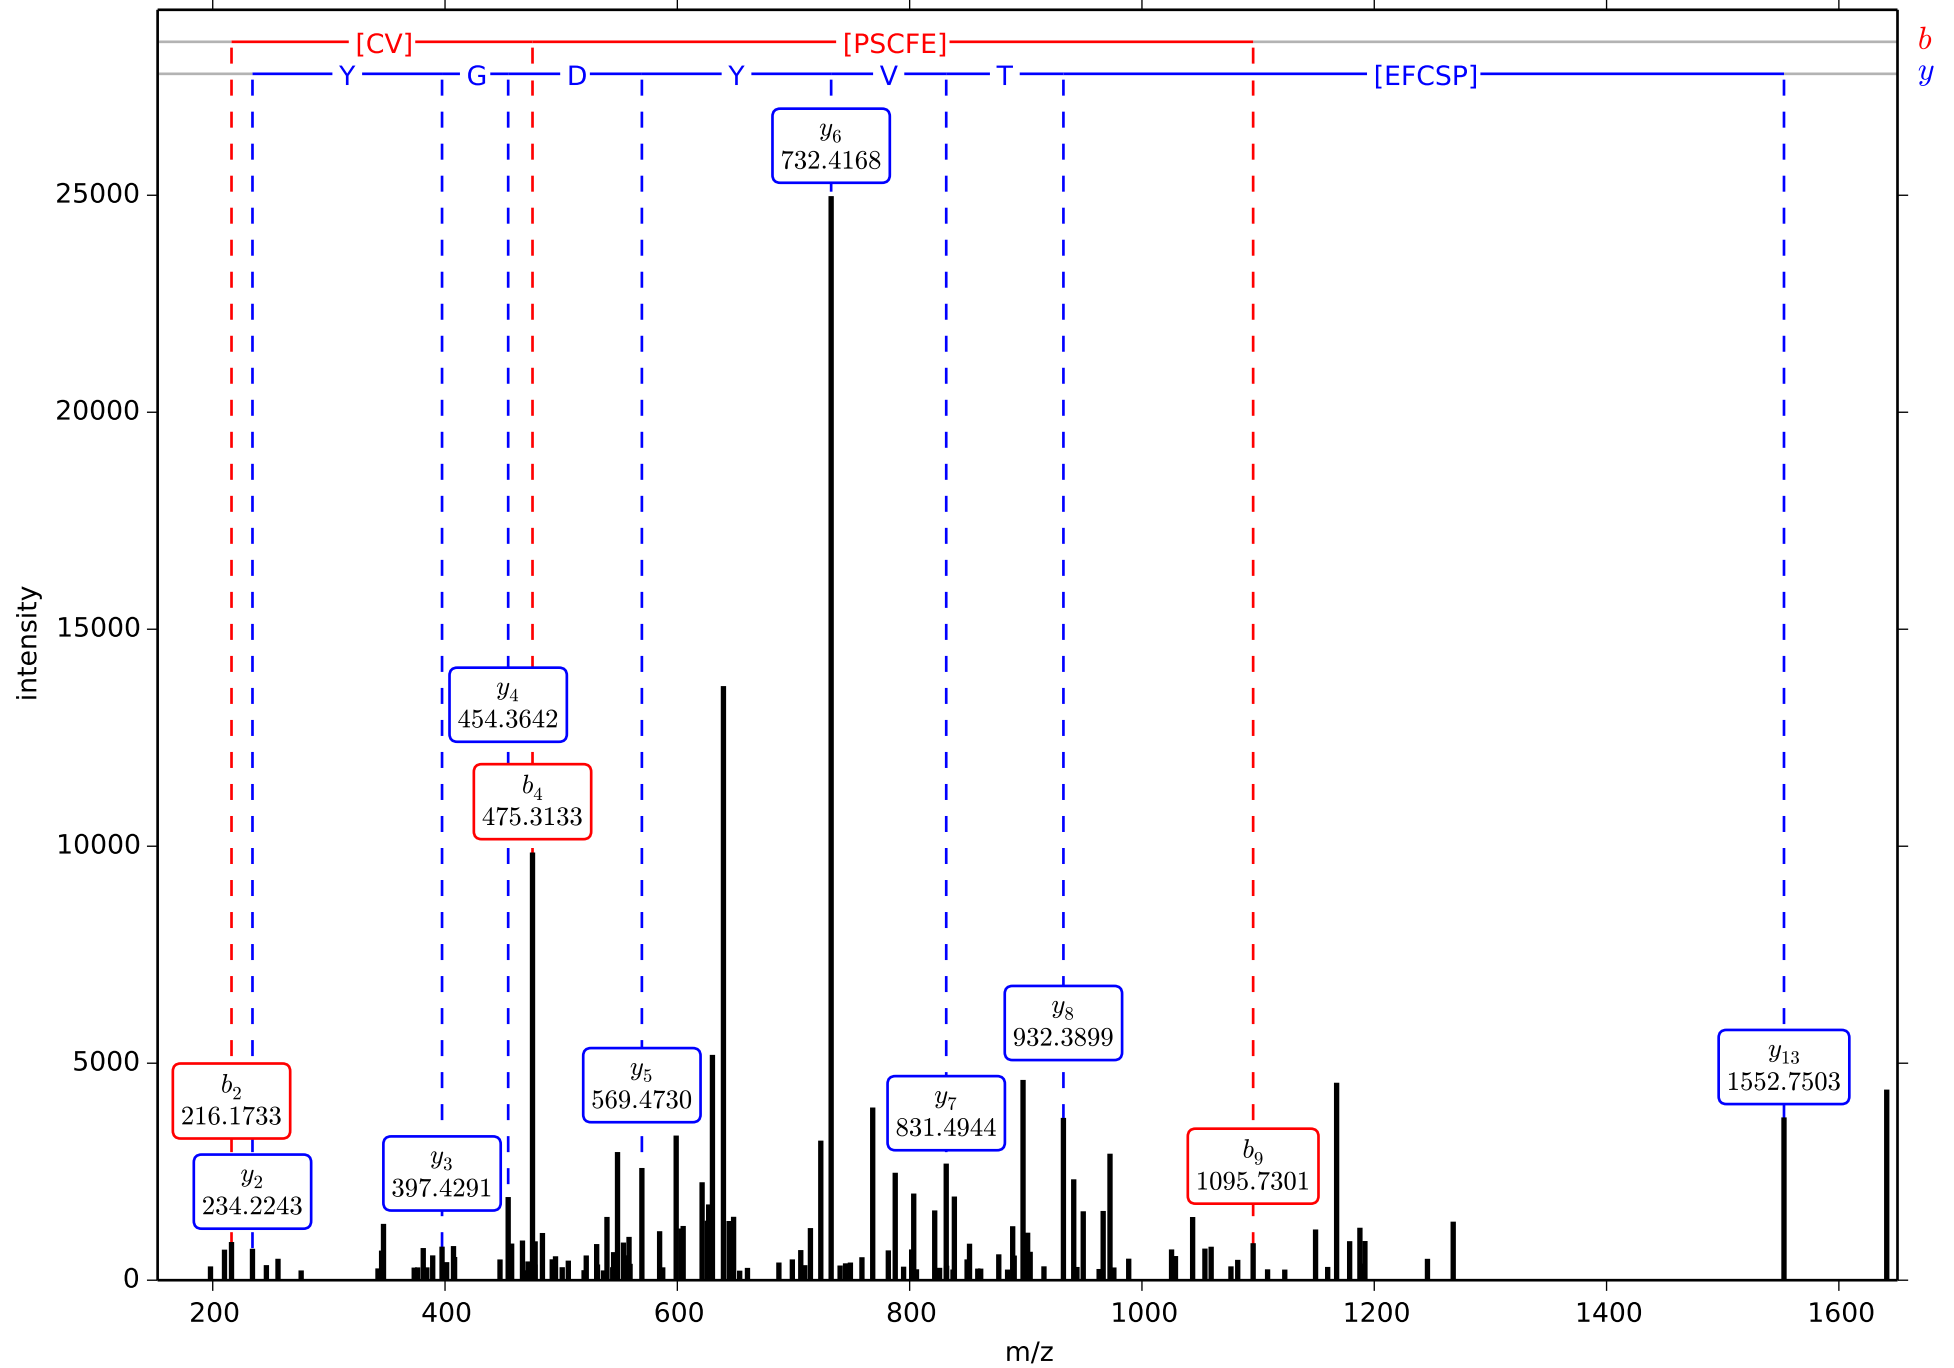

O08749 : TVCIEKNETLGGTCLNVGCIPSK

parent: 850.747850,3+

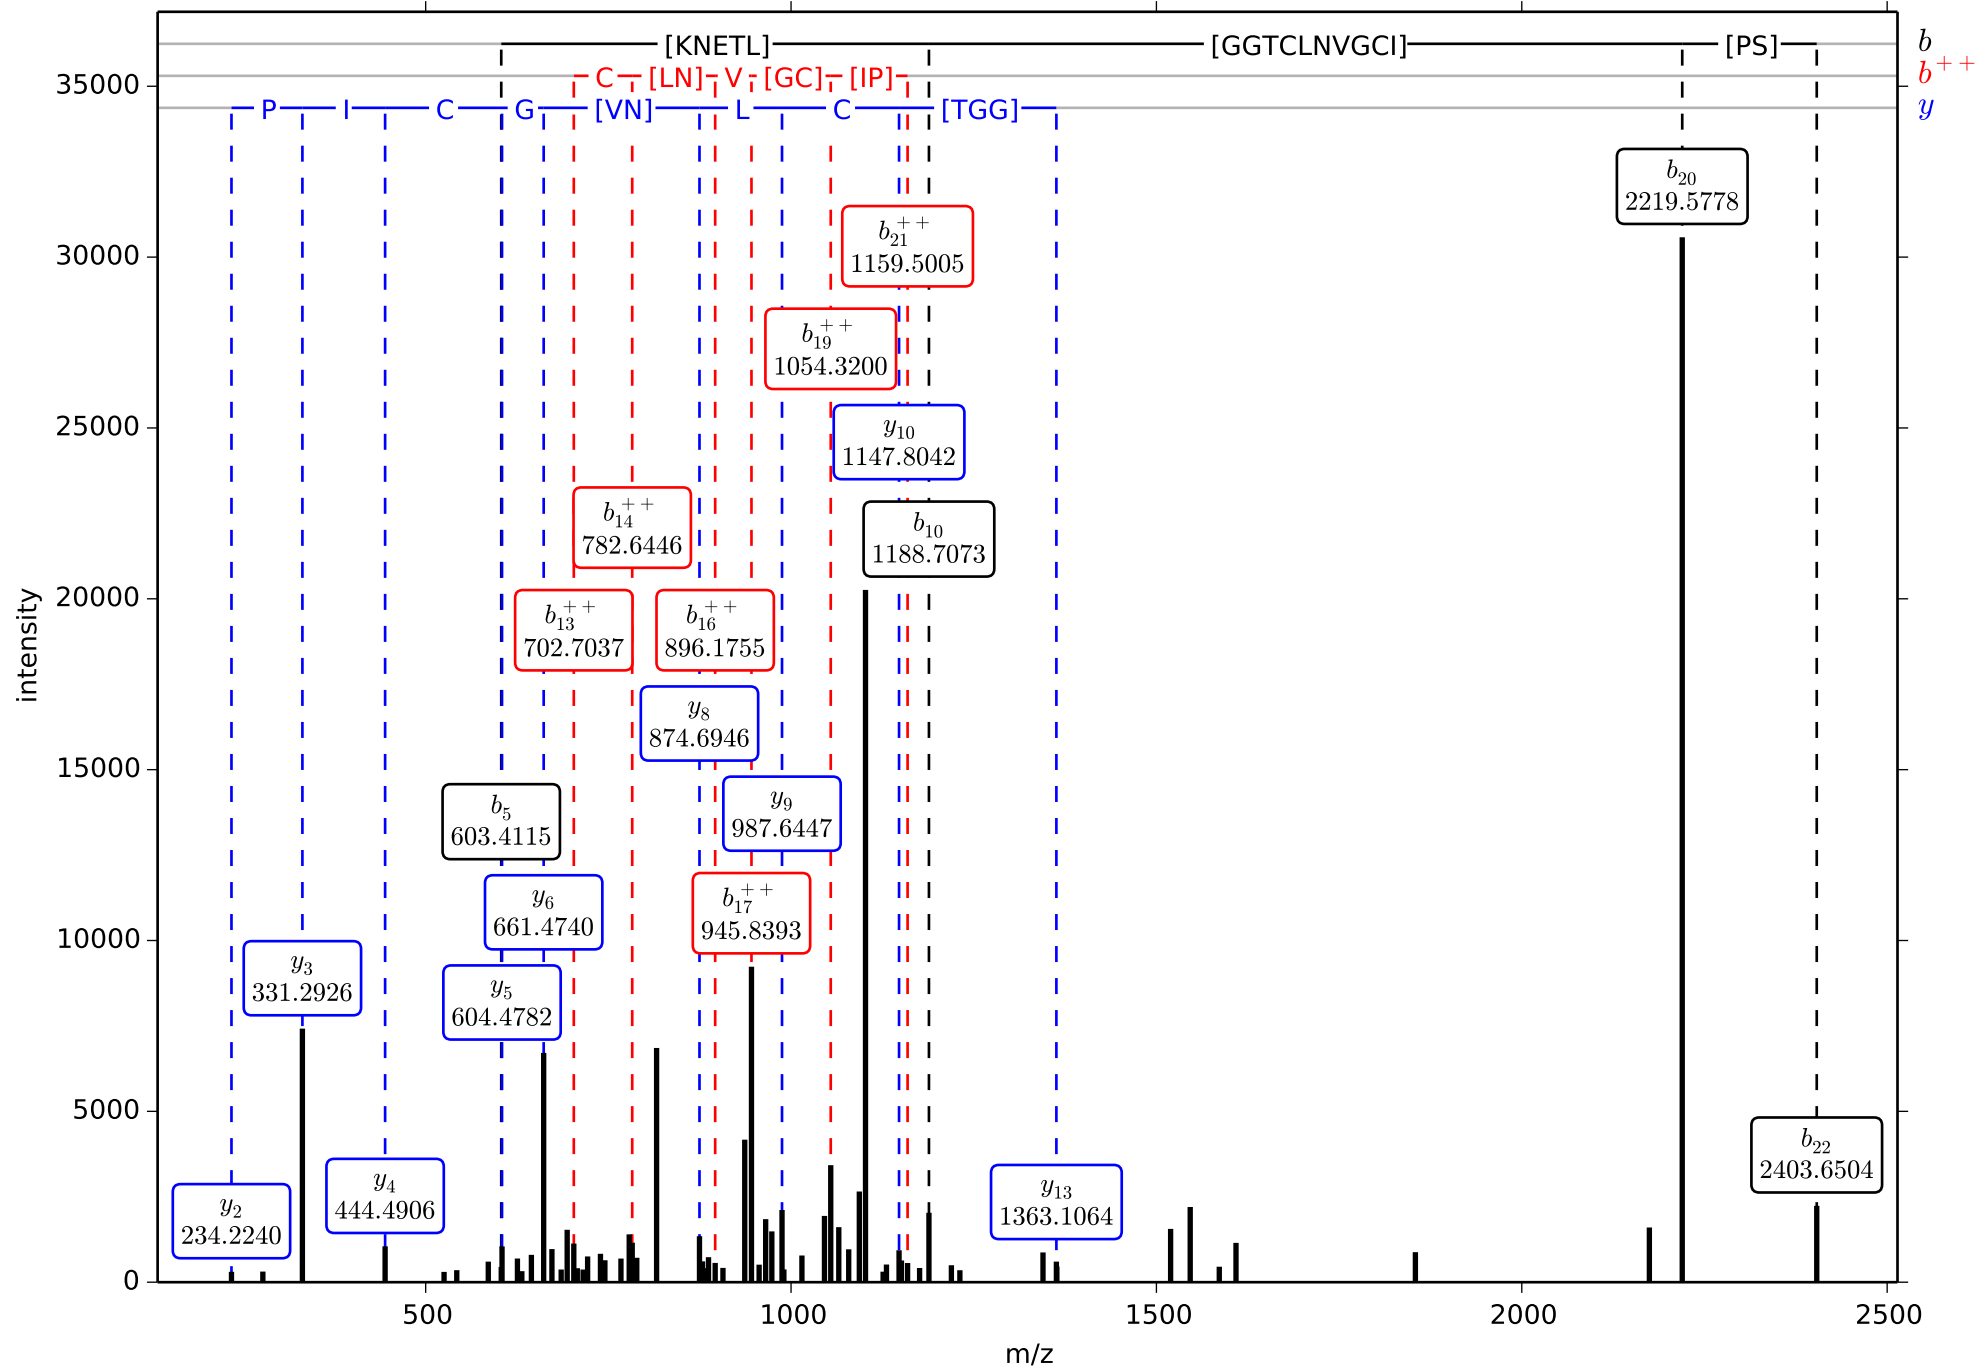

P28184 : SCCSCCPAGCEK

parent: 738.242950,2+

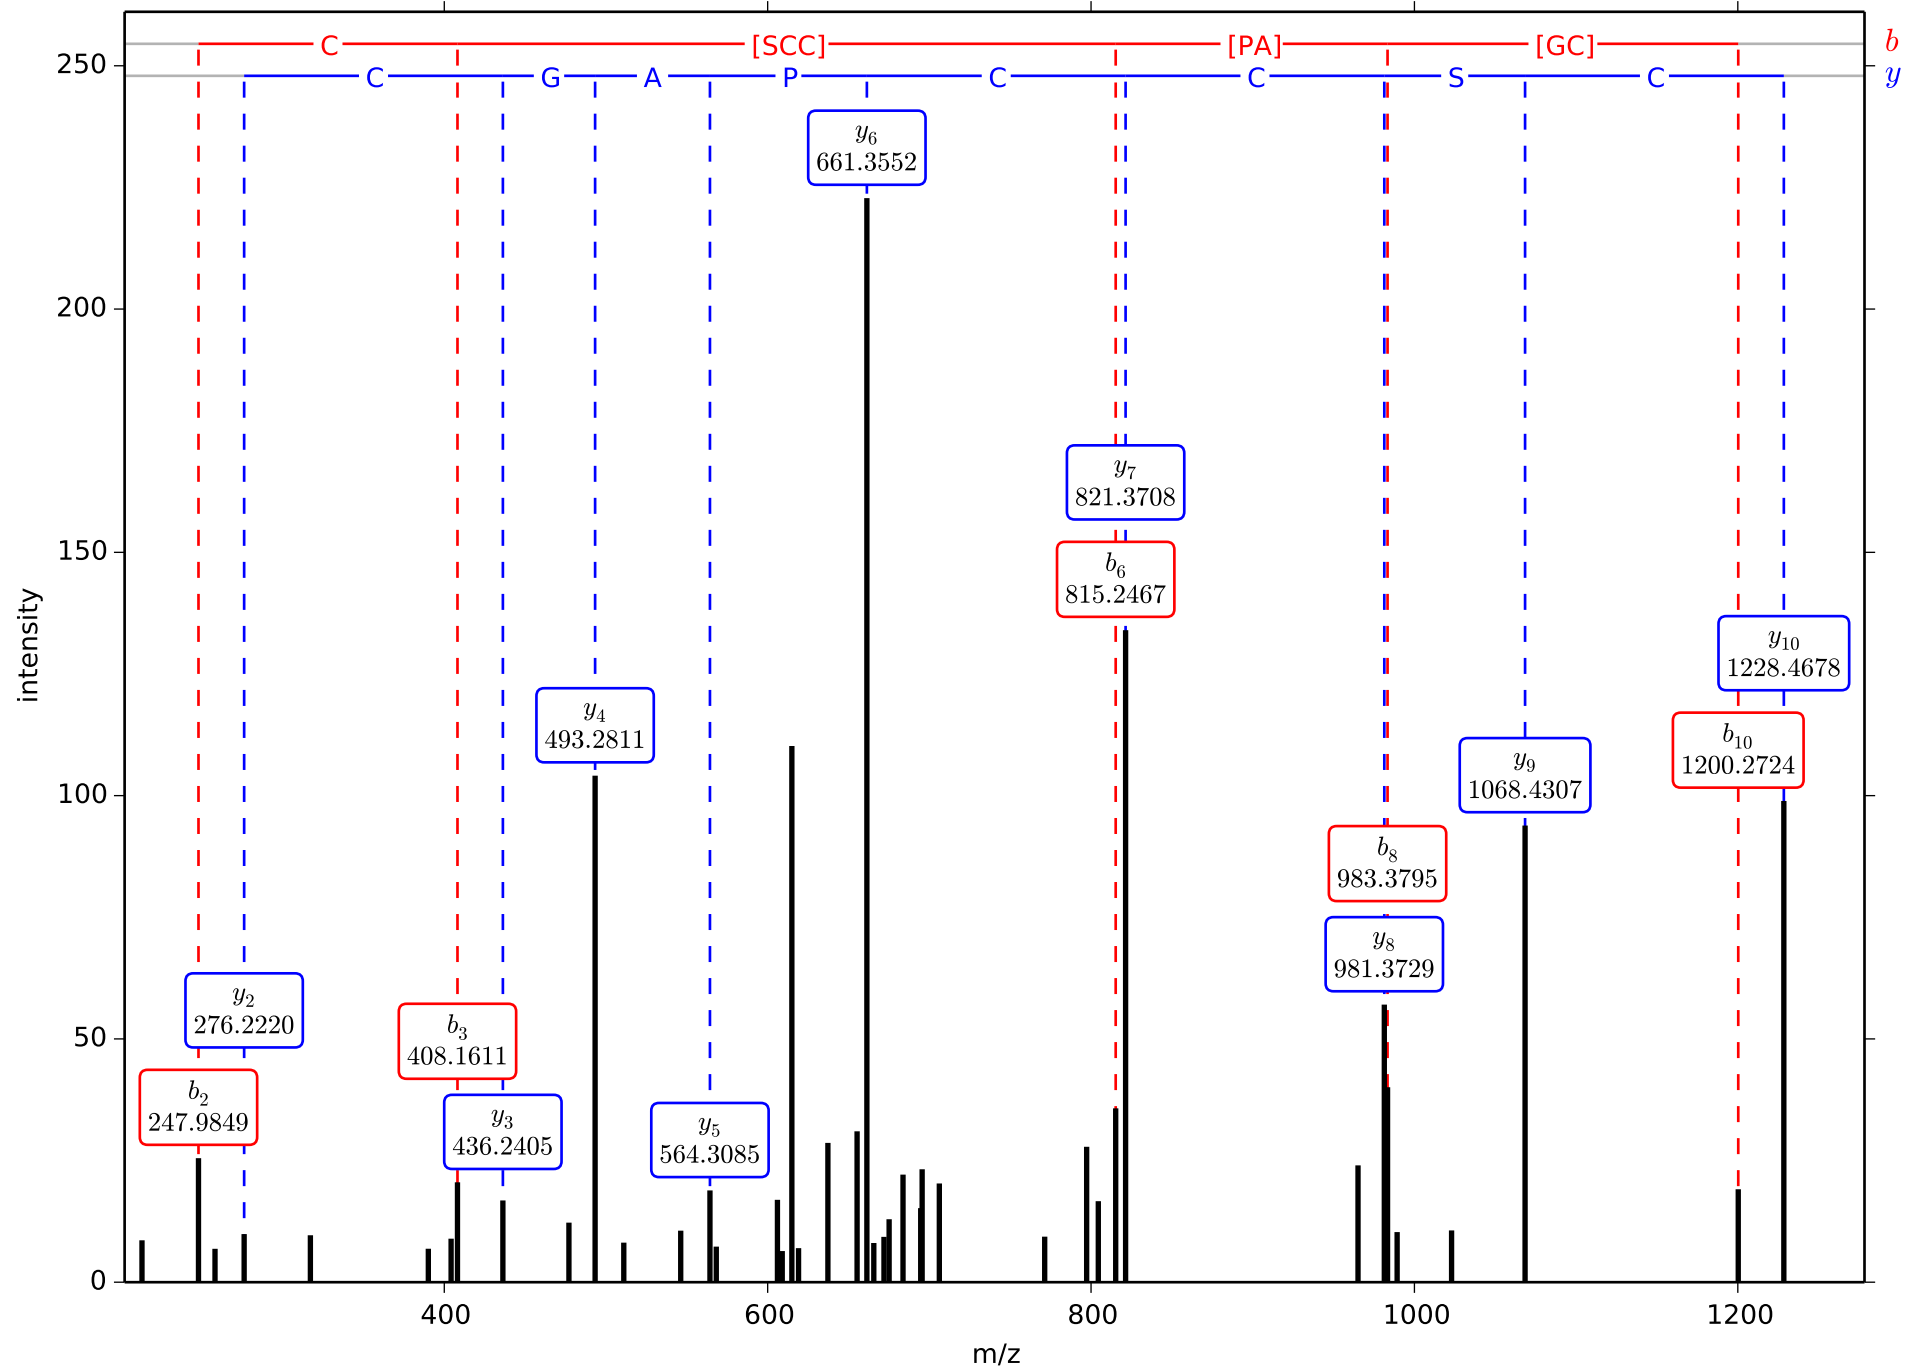

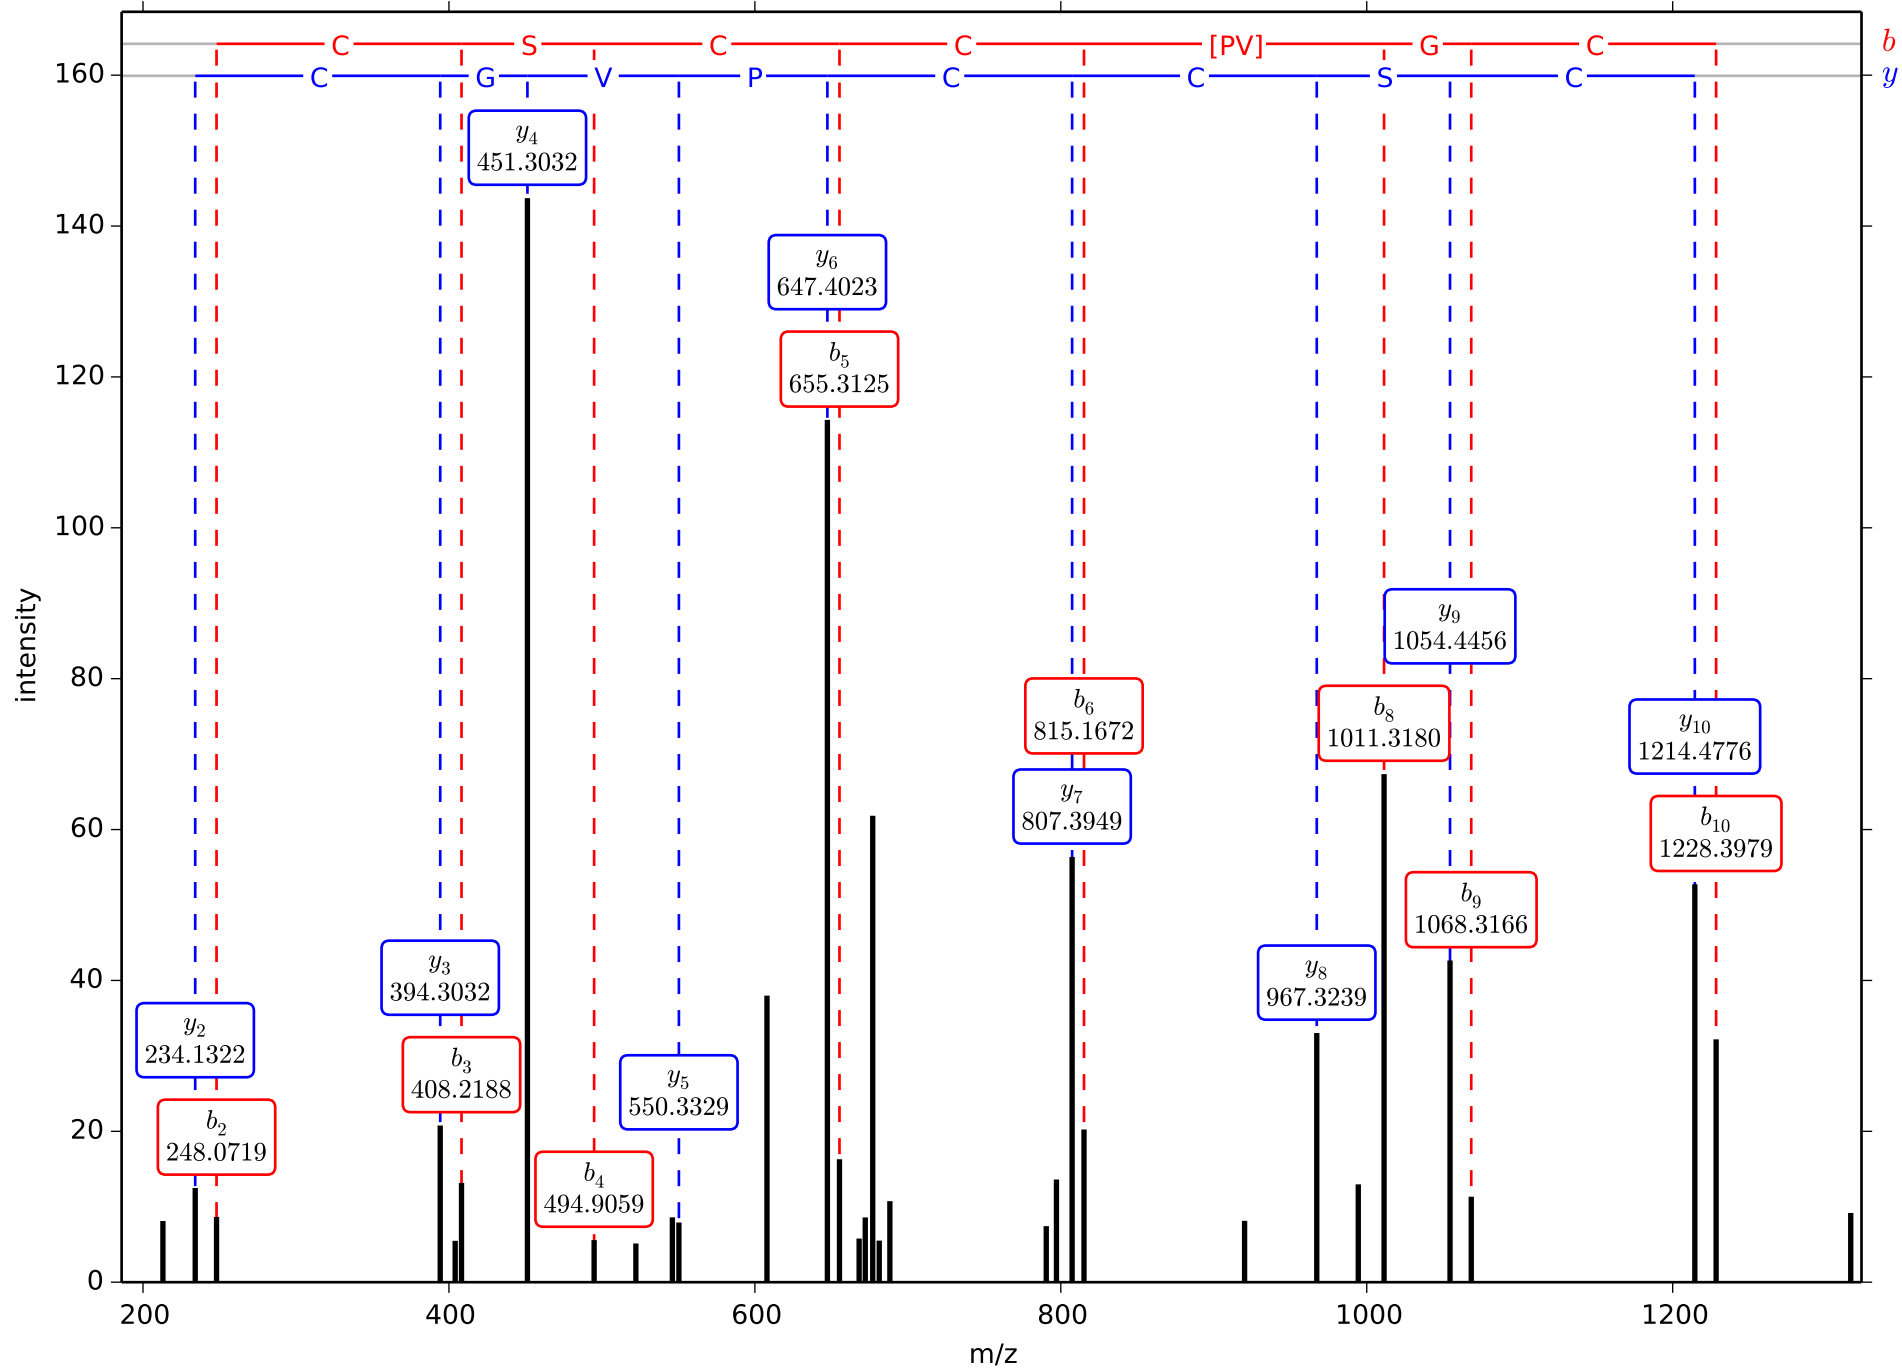

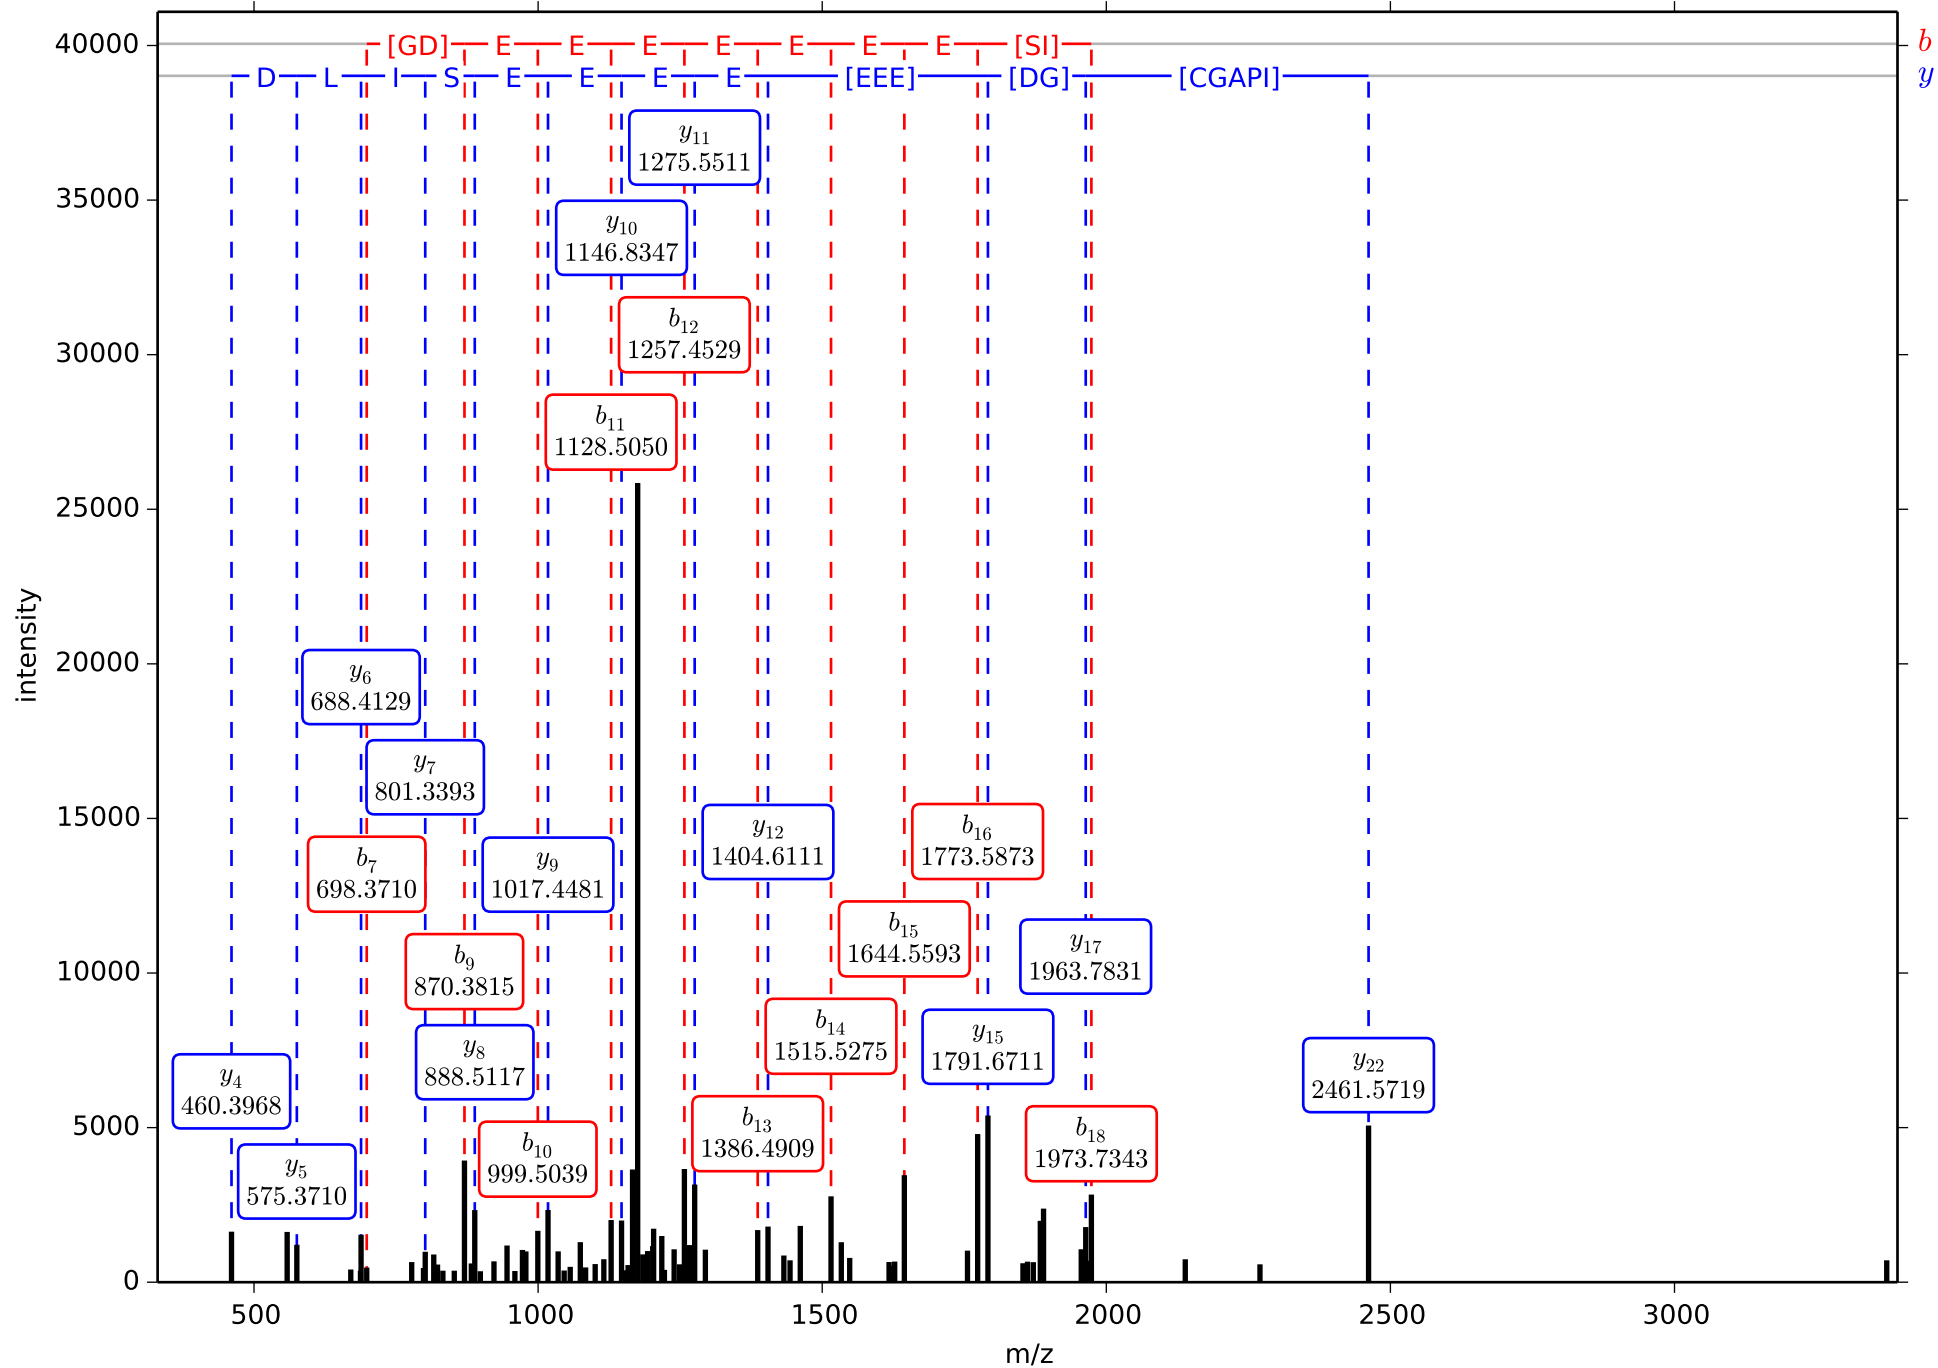

P84086 : AALEQPCEGSLTRPK

parent: 828.920560,2+

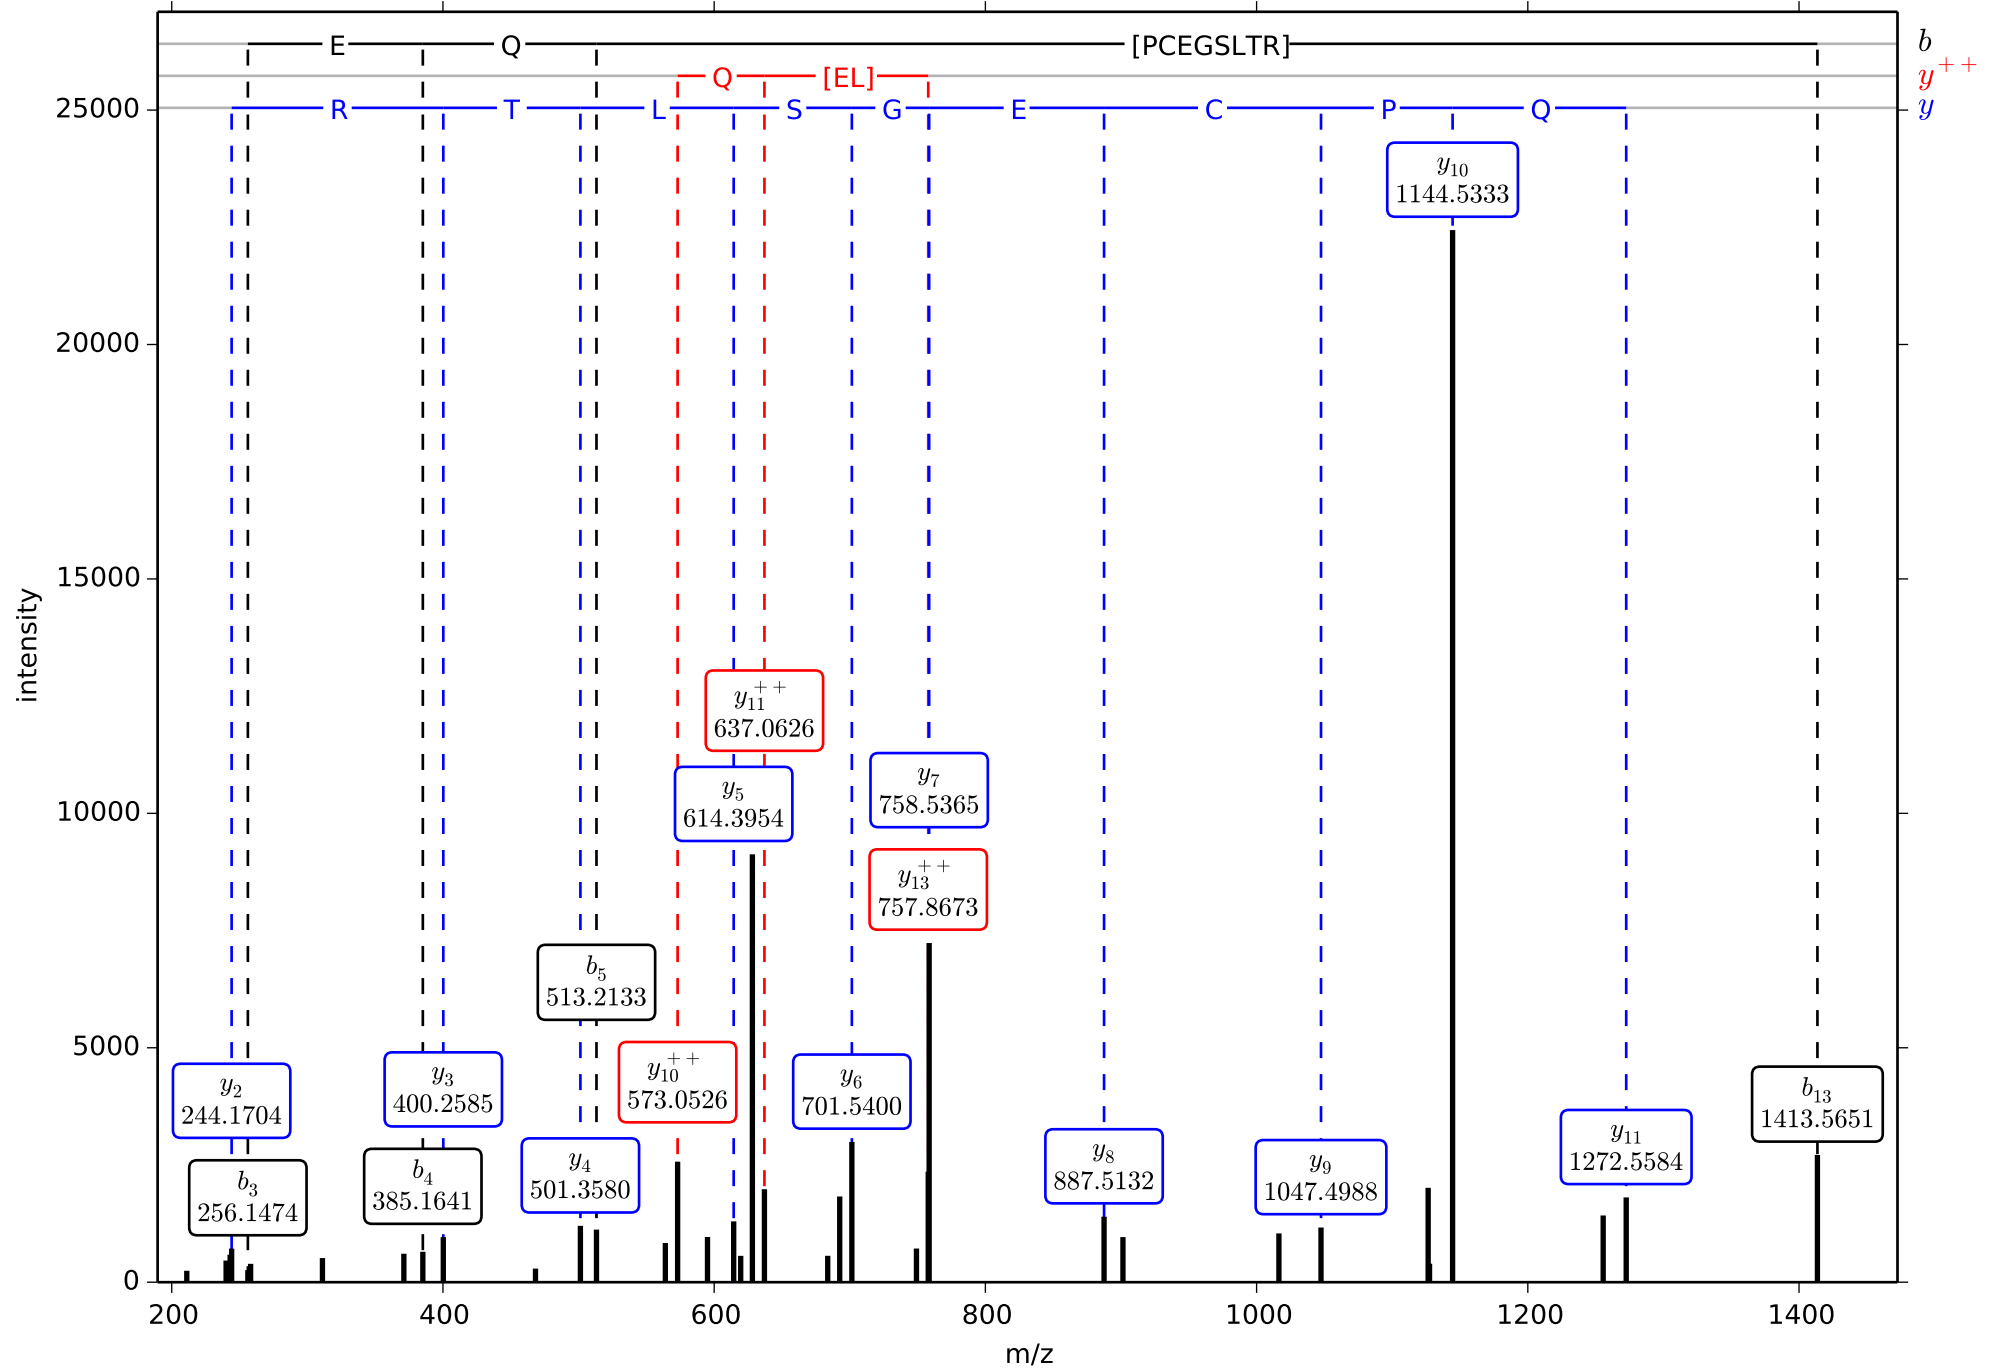

P15532 : GDFCIQVGR

parent: 526.250880,2+

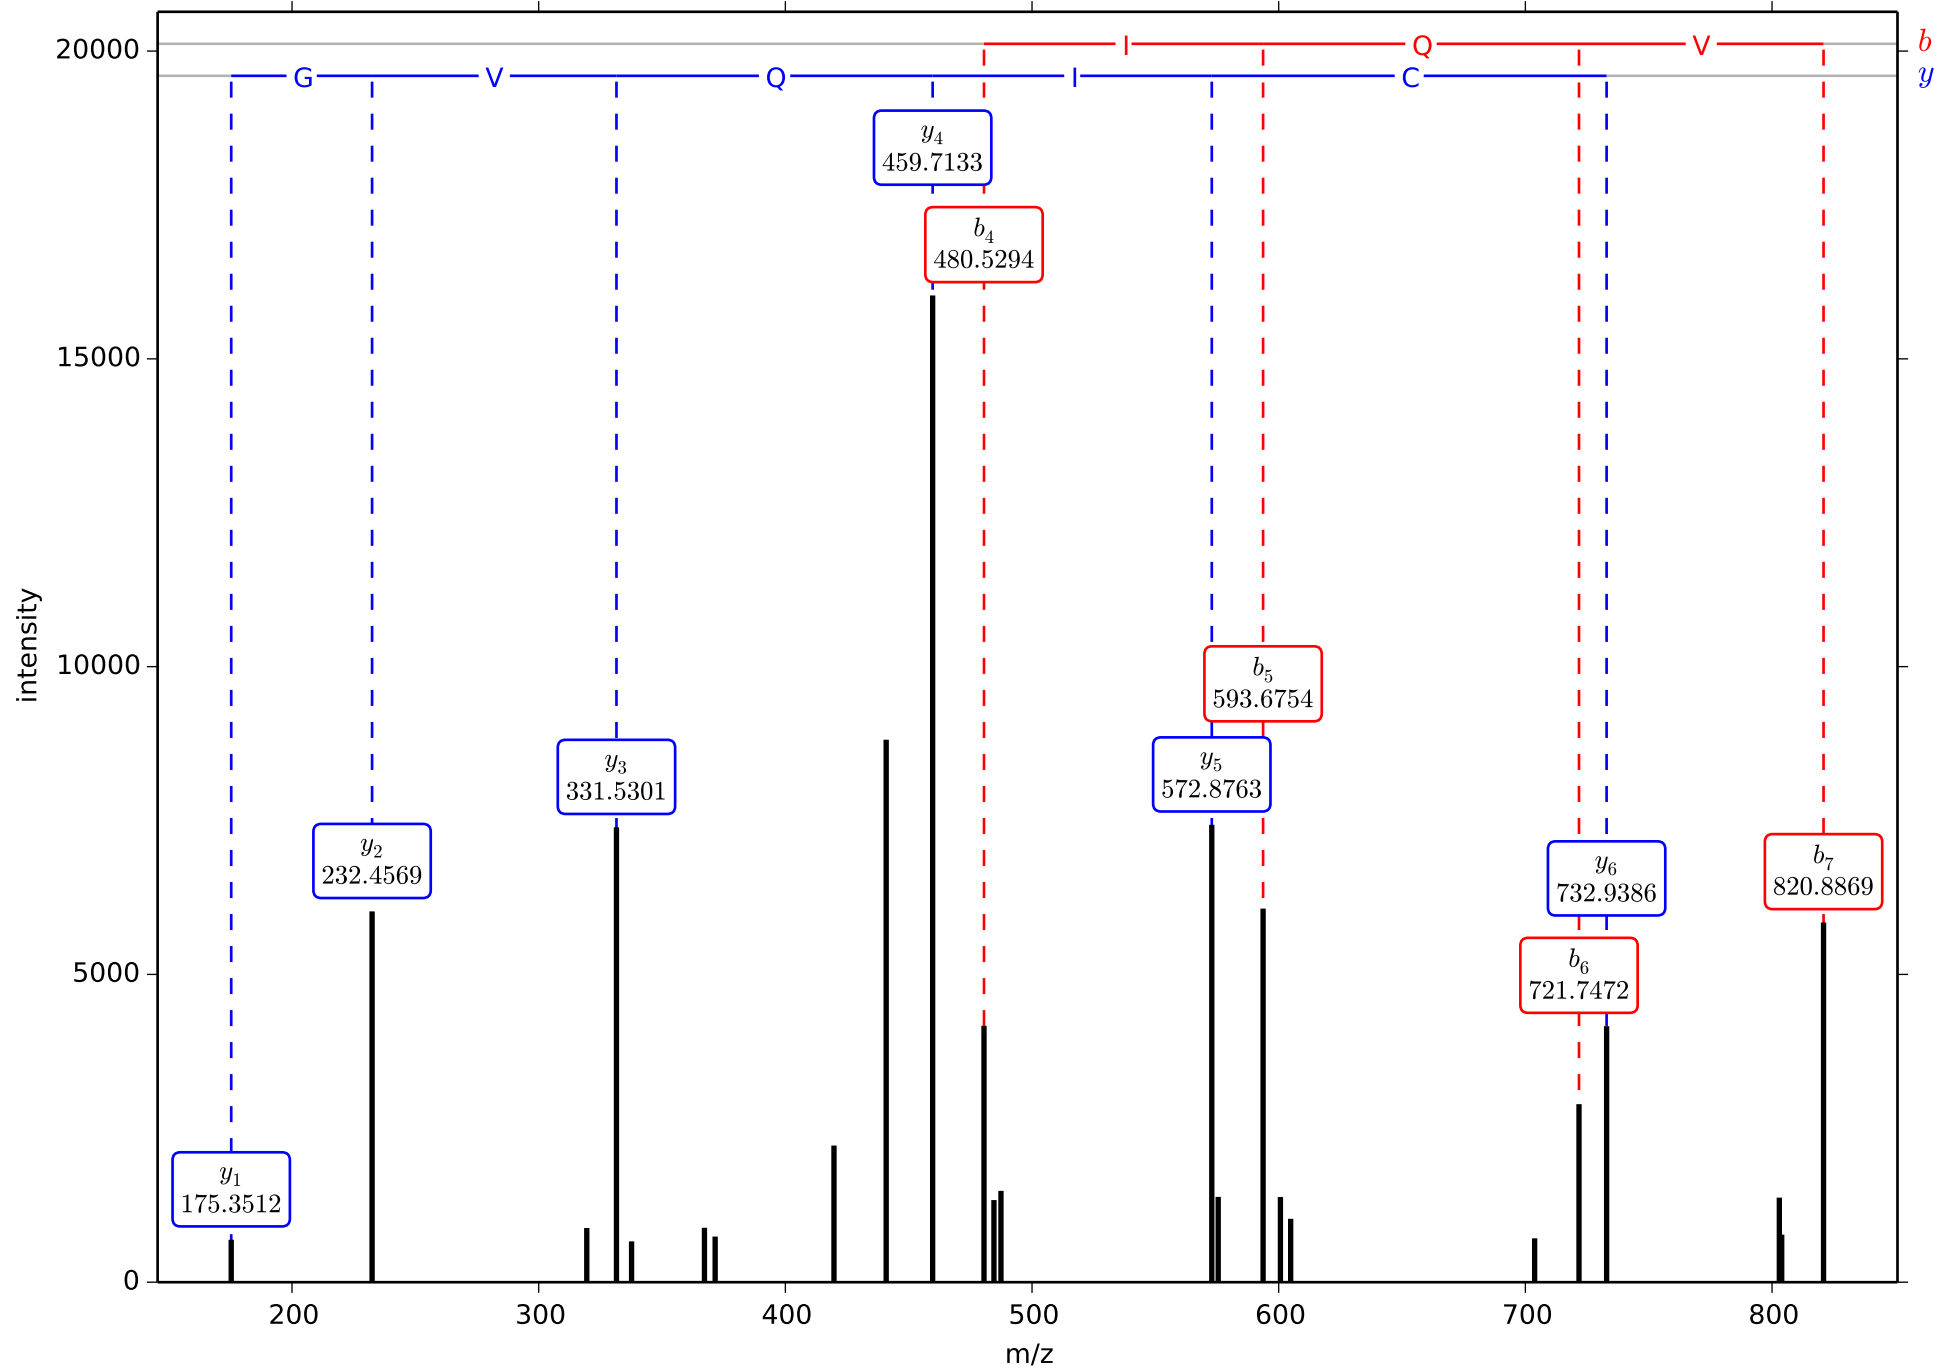



P15532 : SCAQNWIYE

parent: 585.746890,2+

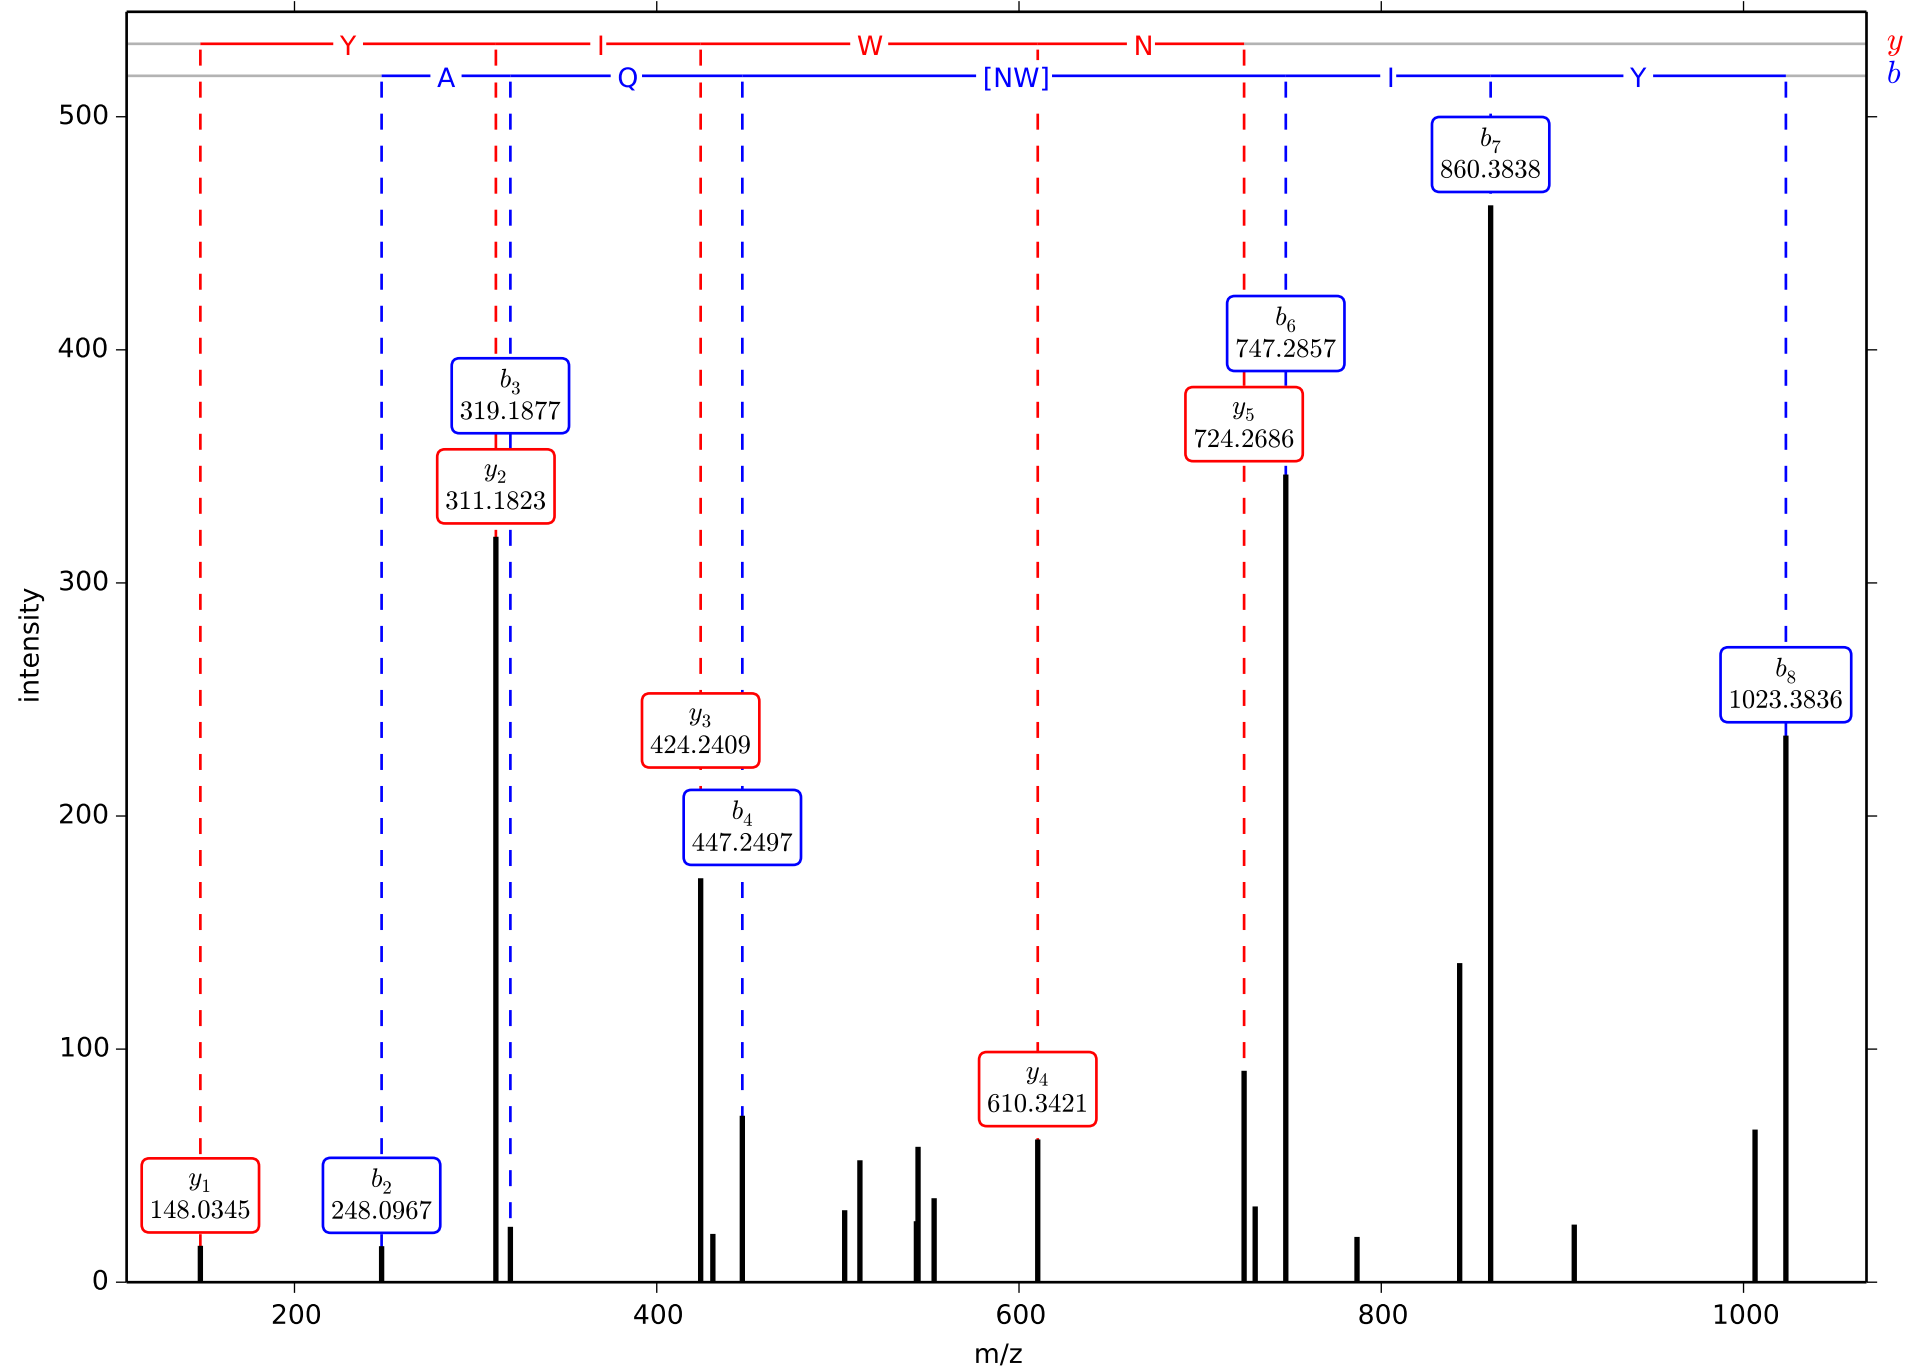

P63038 : AAVEEGIVLGGGCALLR

parent: 842.966050,2+

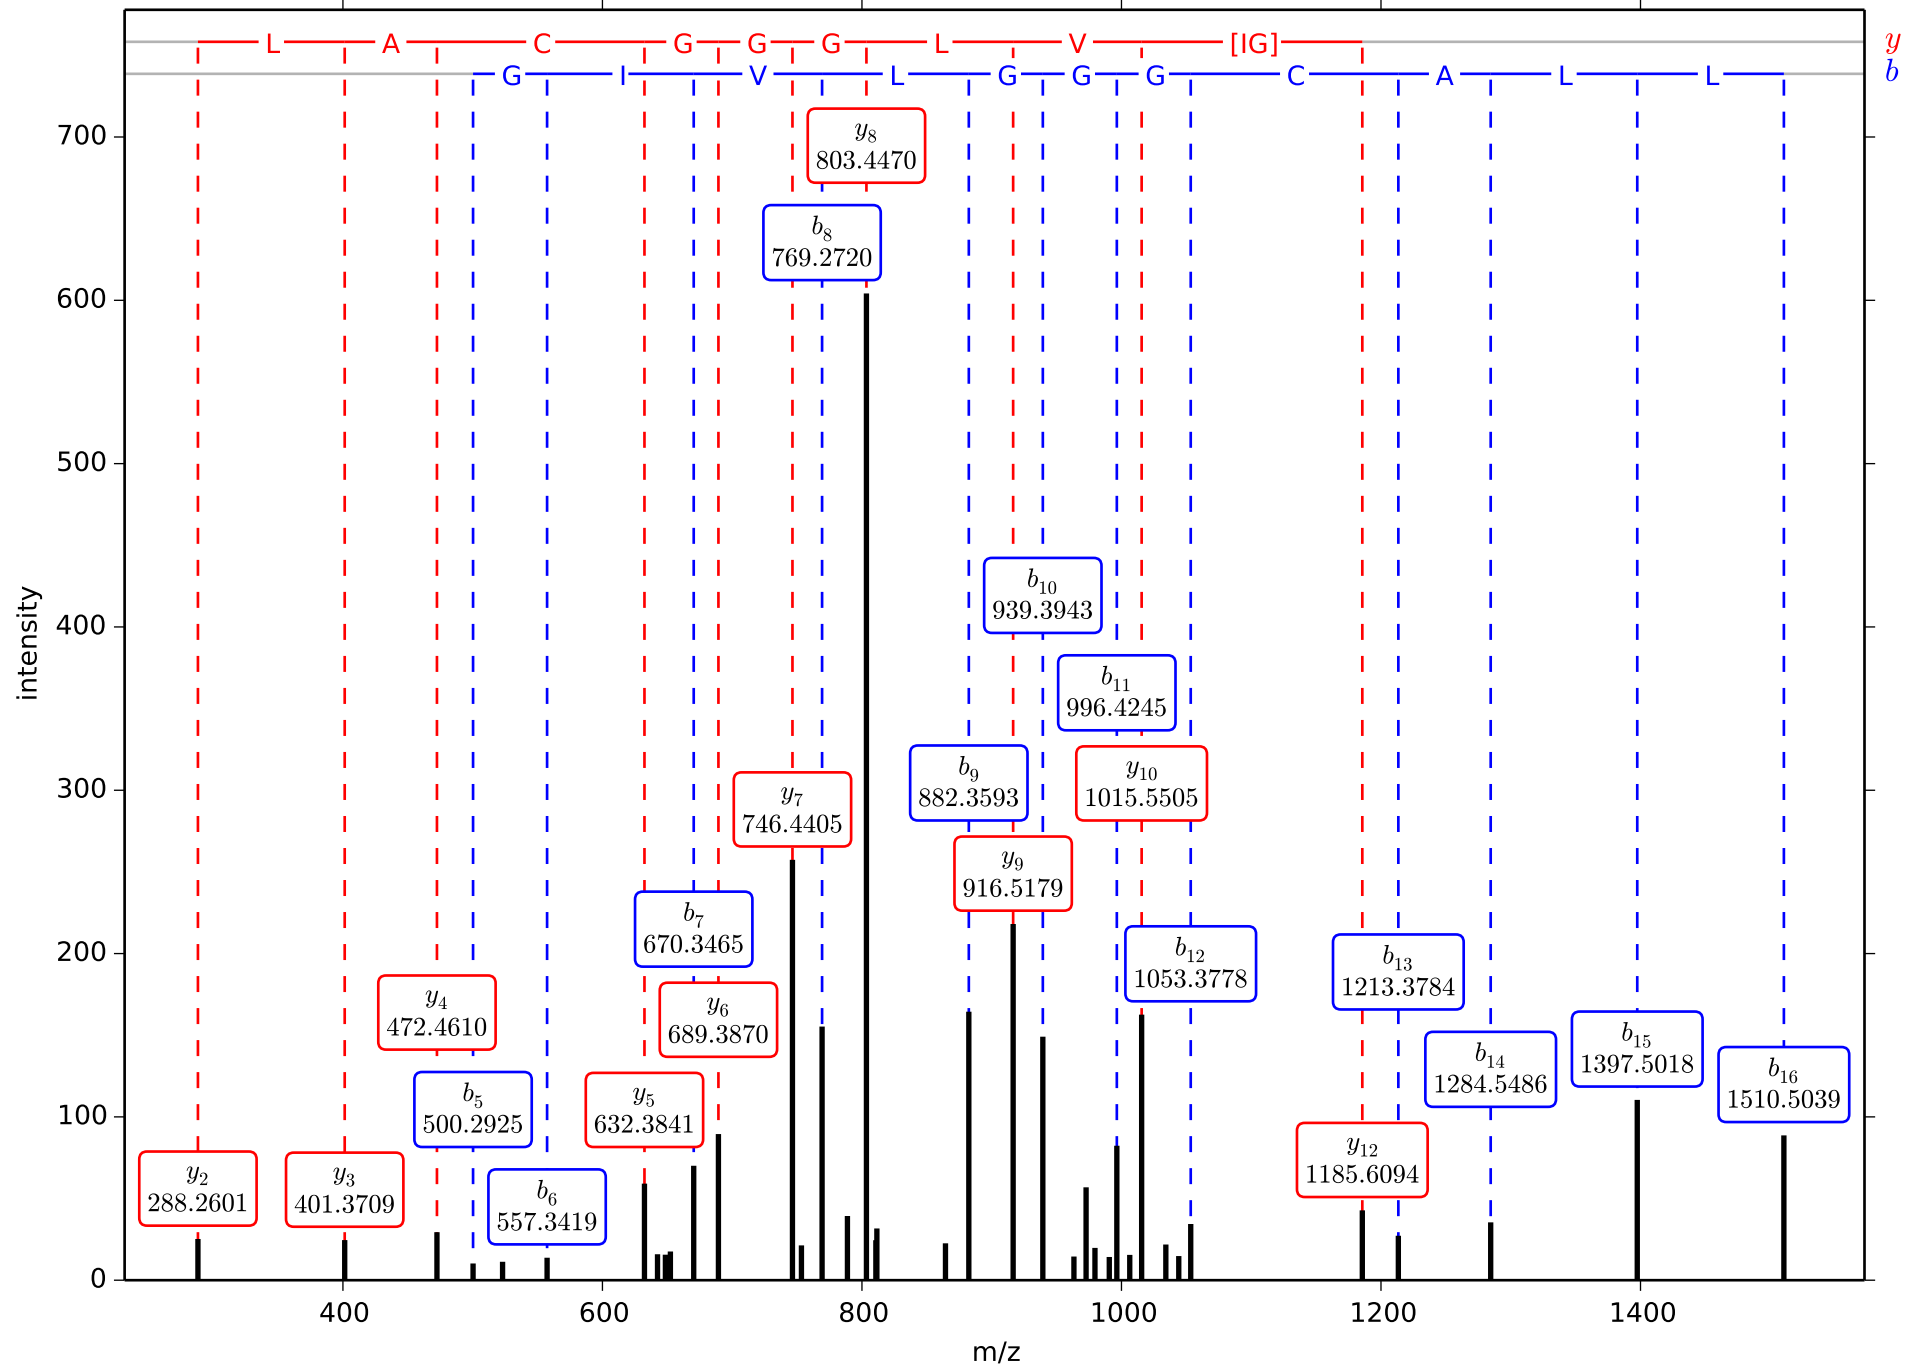

P63038 : CEFQDAYVLLSEK

parent: 801.384590,2+

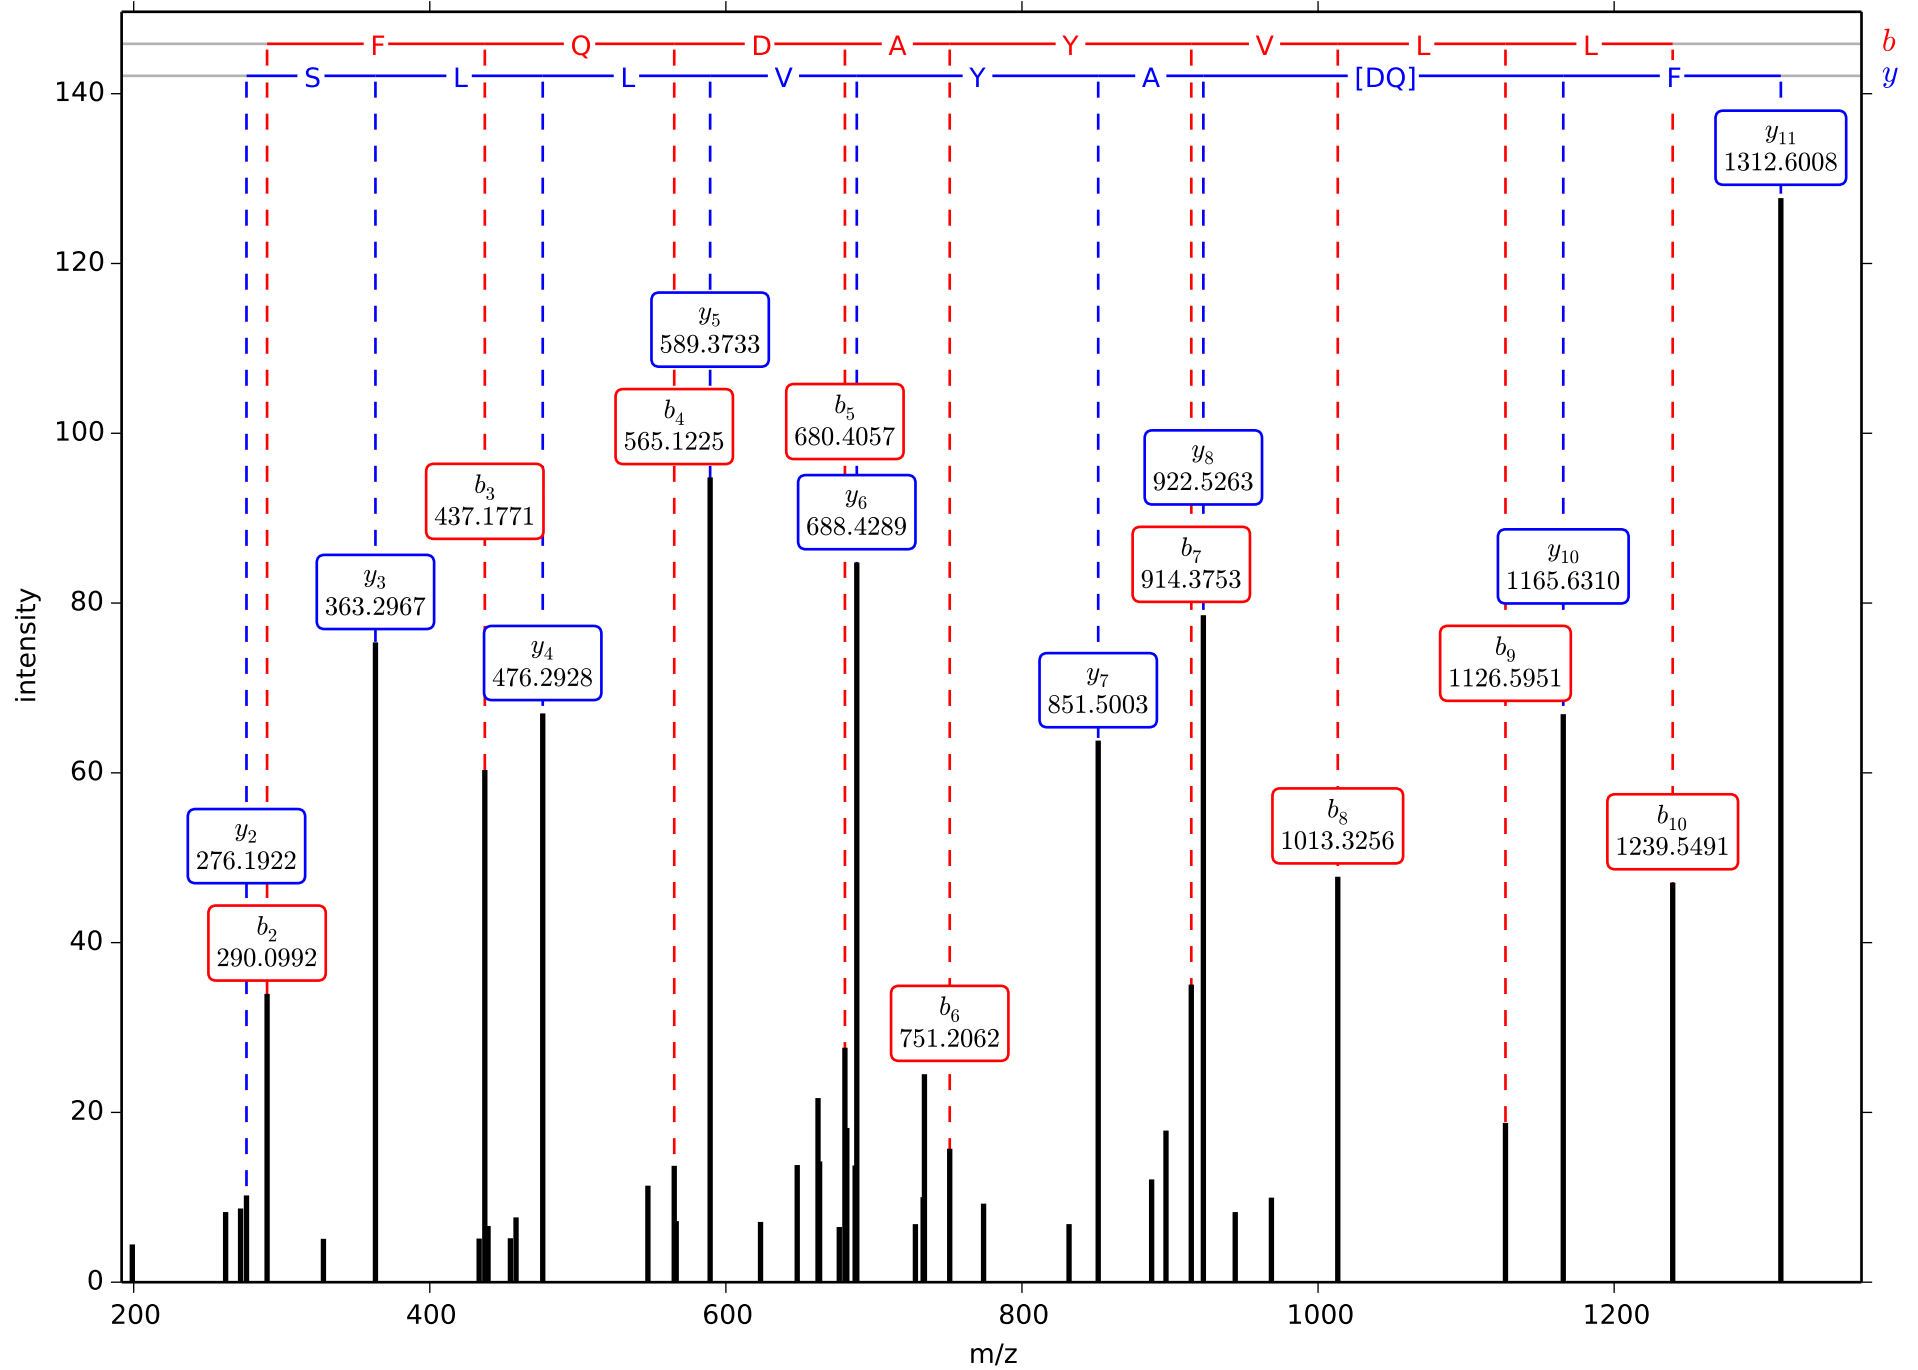

P63038 : CEFQDAYVLLSEKK

parent: 577.286960,3+

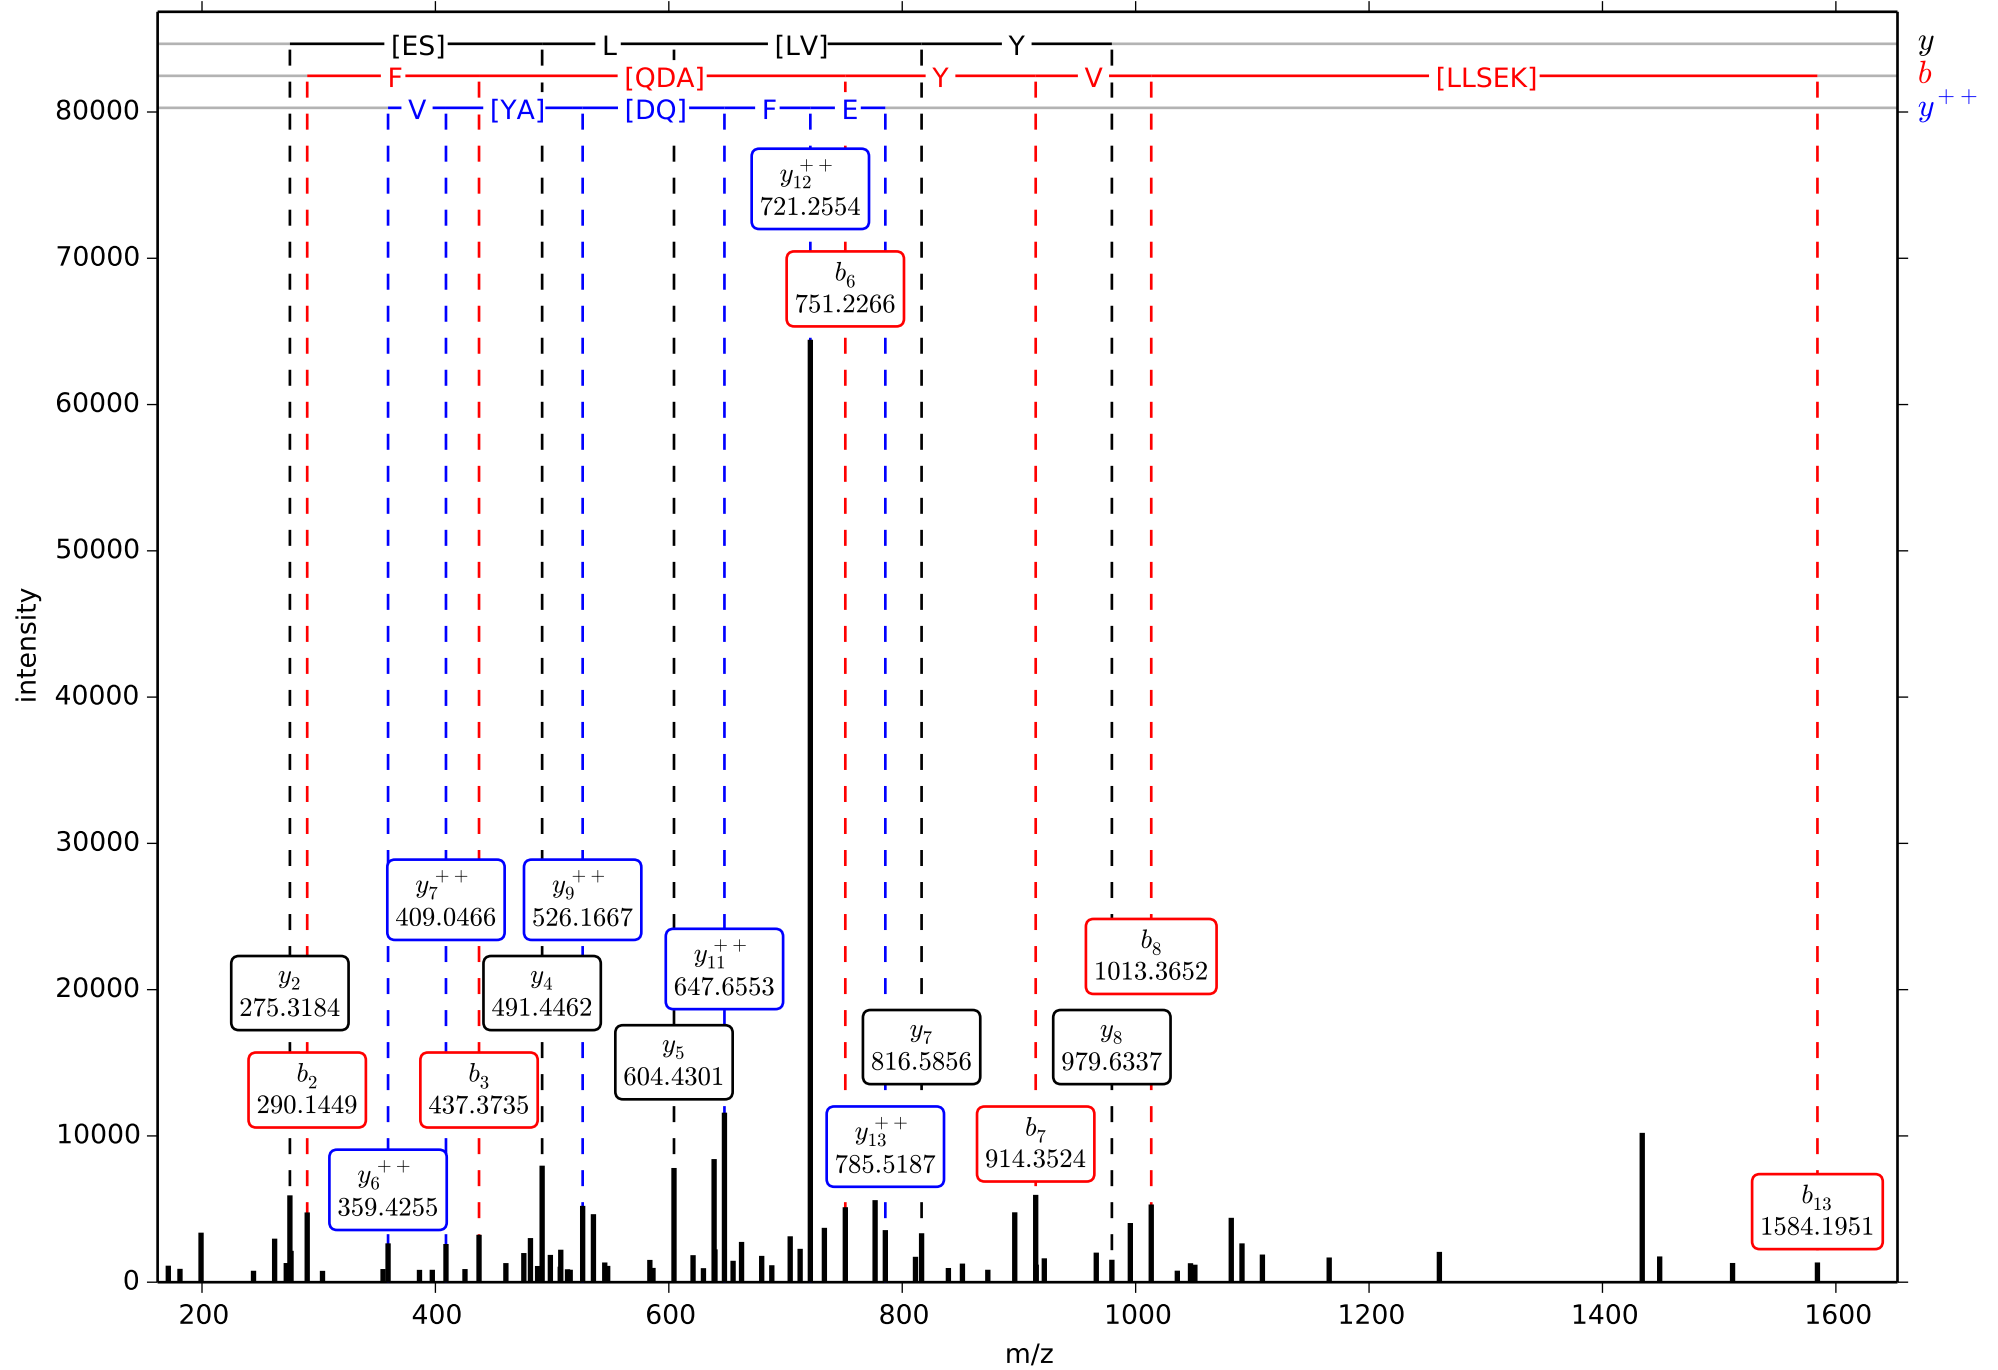

P62761 : SDPSIVLLLQCDIQK

parent: 864.963020,2+

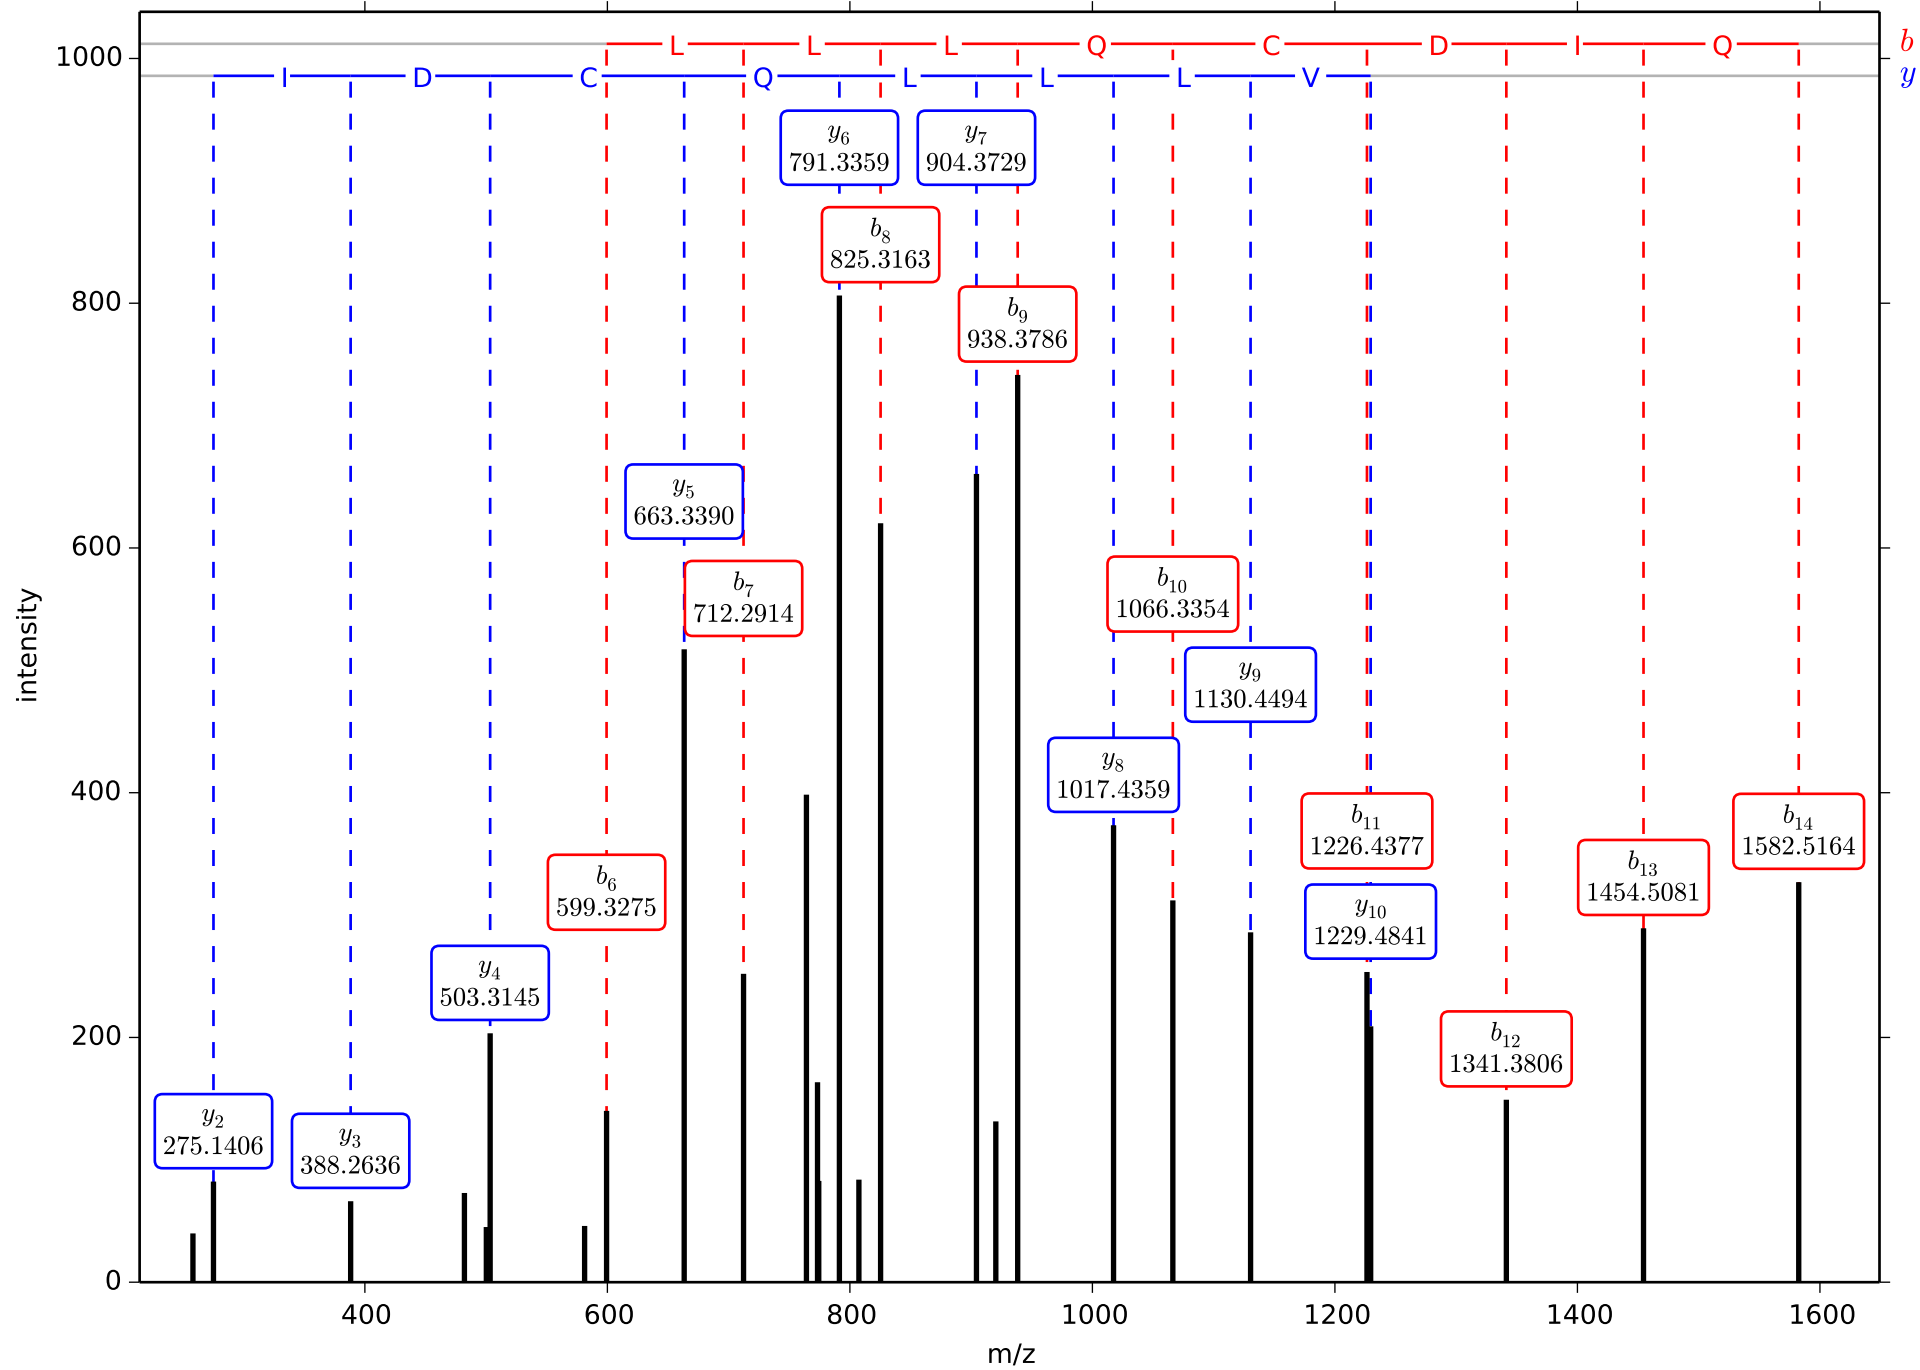

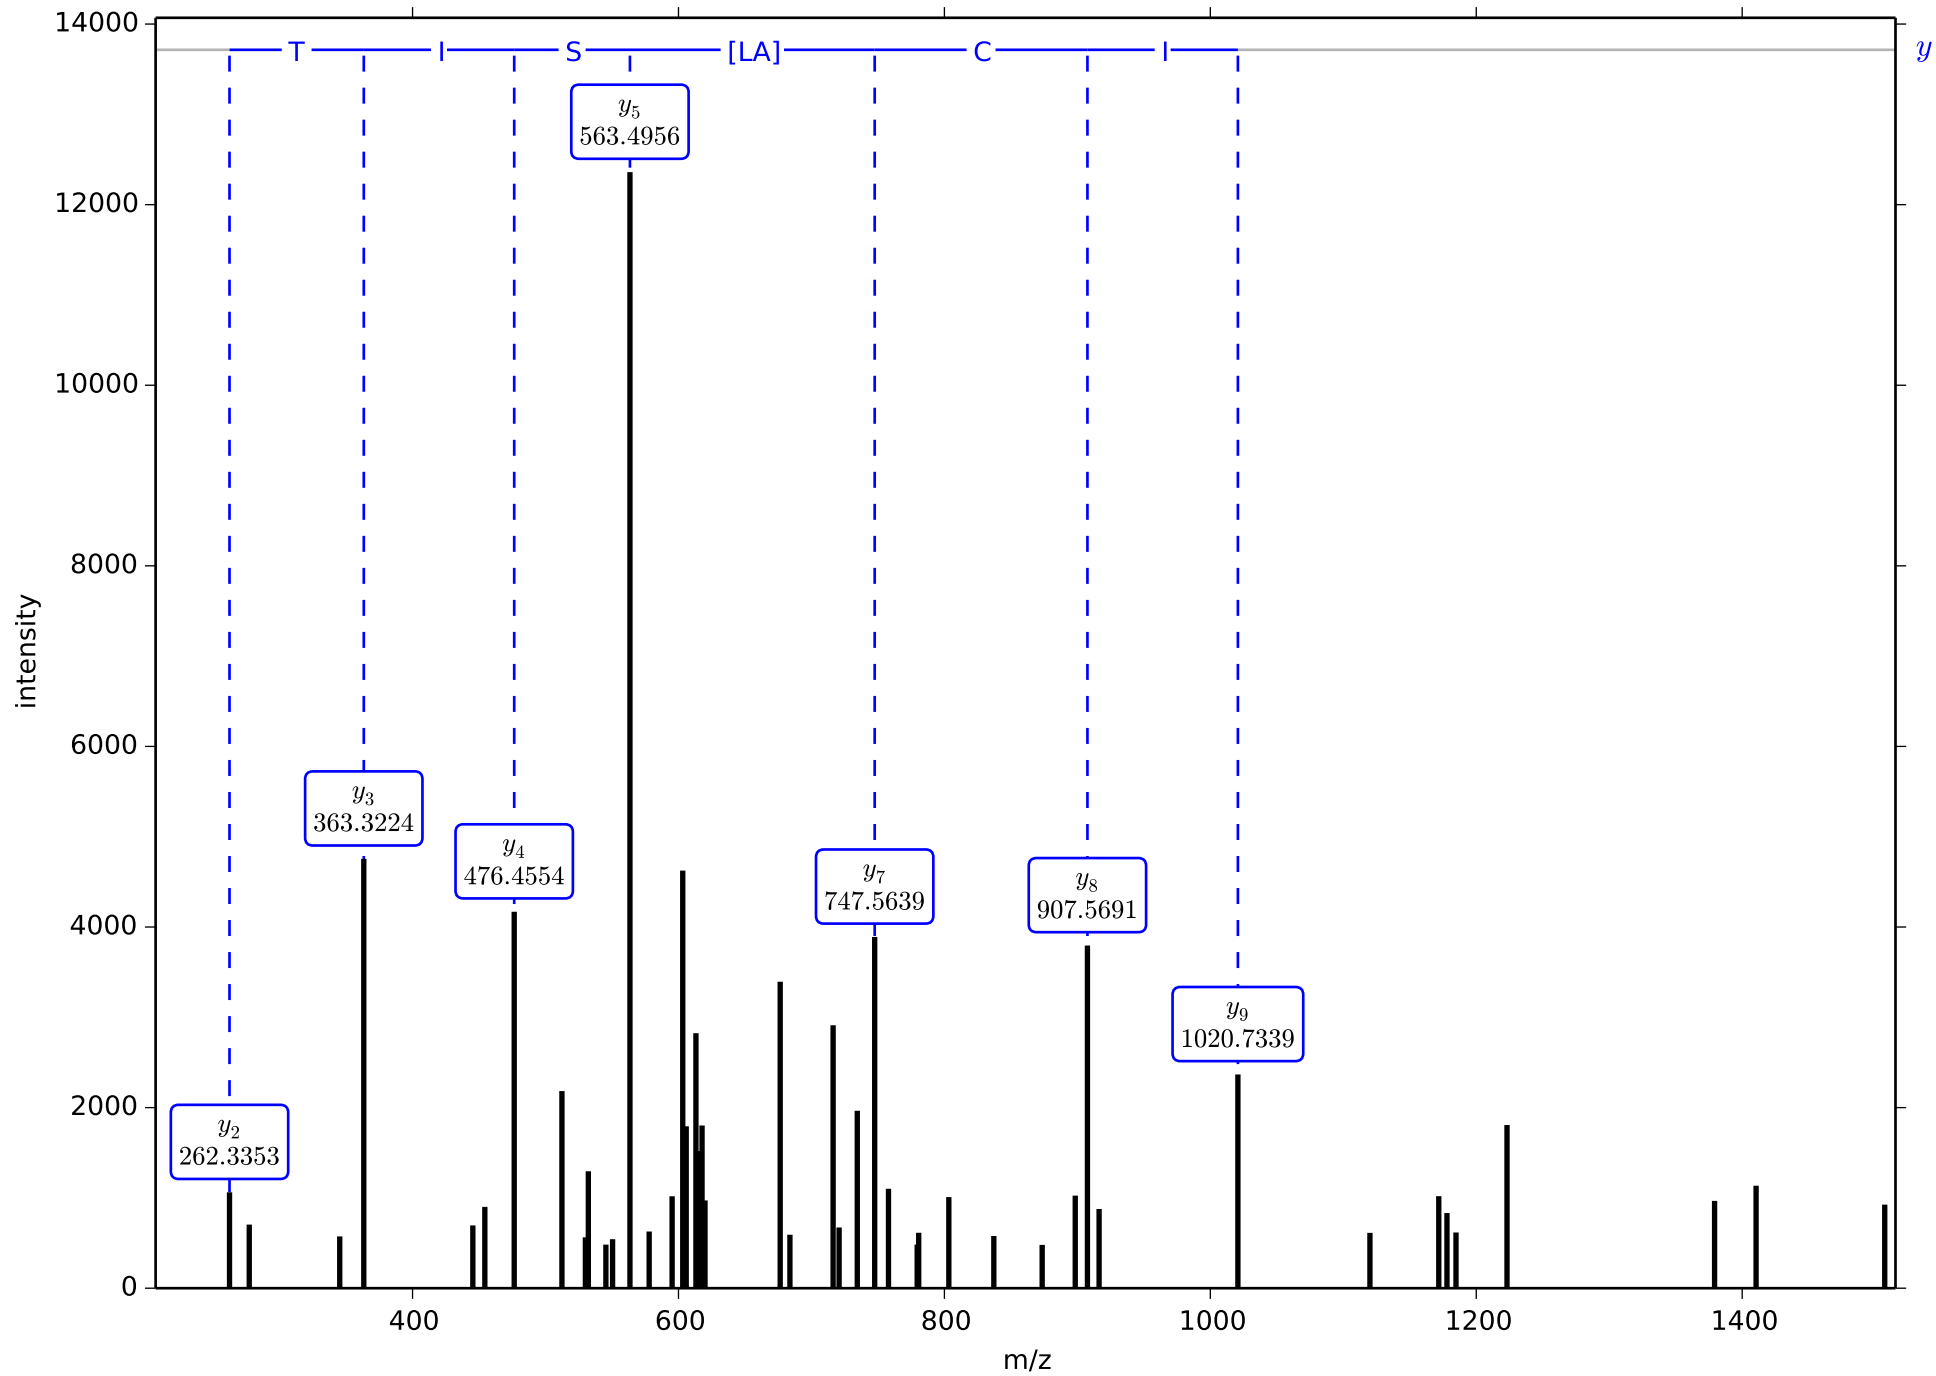

Q60932 : EHNLCGVDFDIAGPSIR

parent: 1064.523300,2+

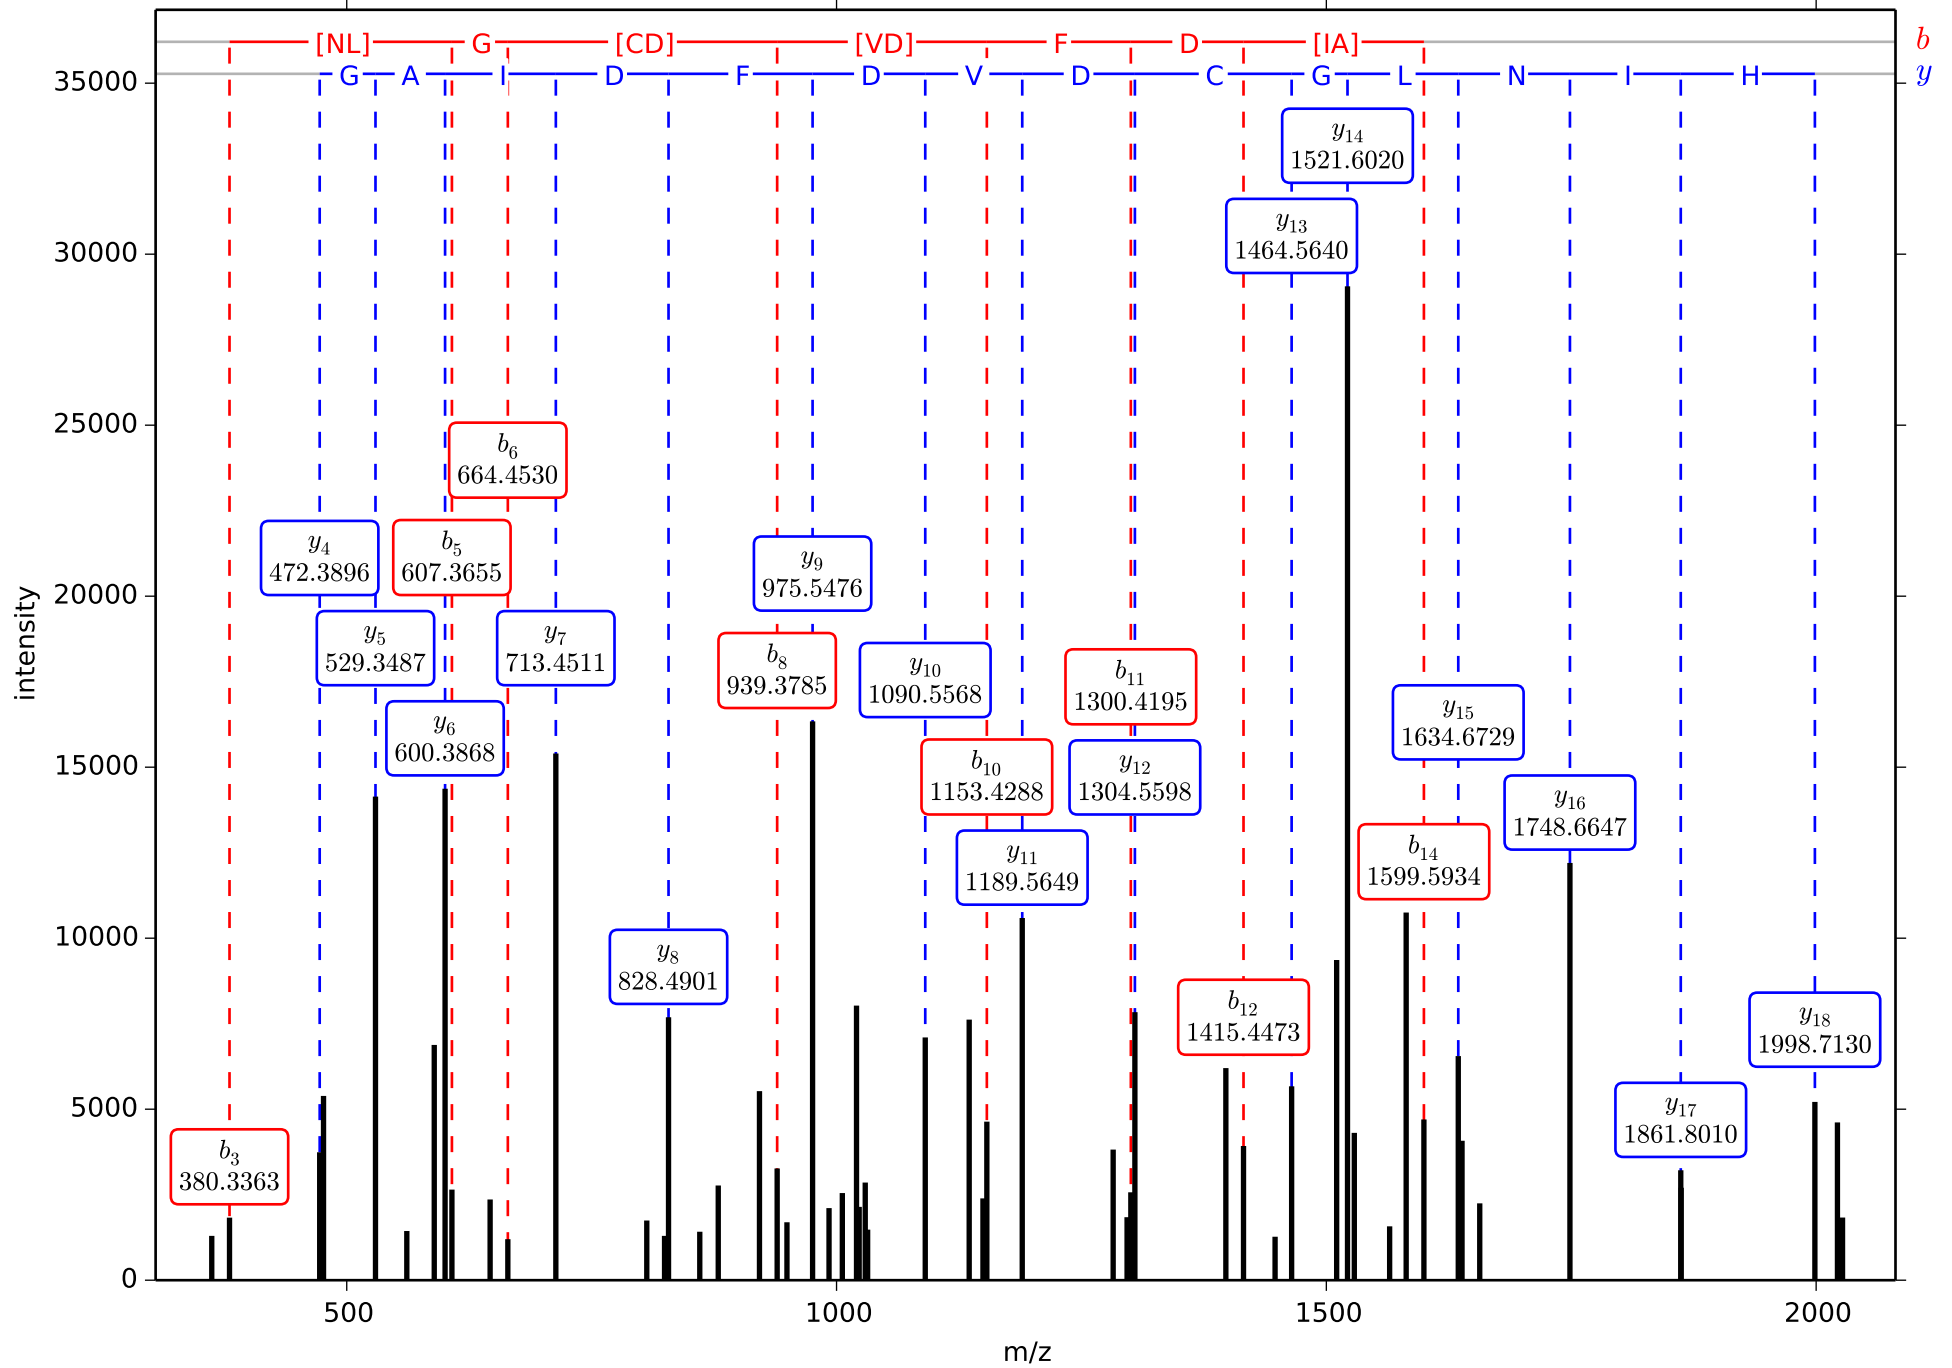

Q60932 : YQVDPDACFSAK

parent: 700.809030,2+

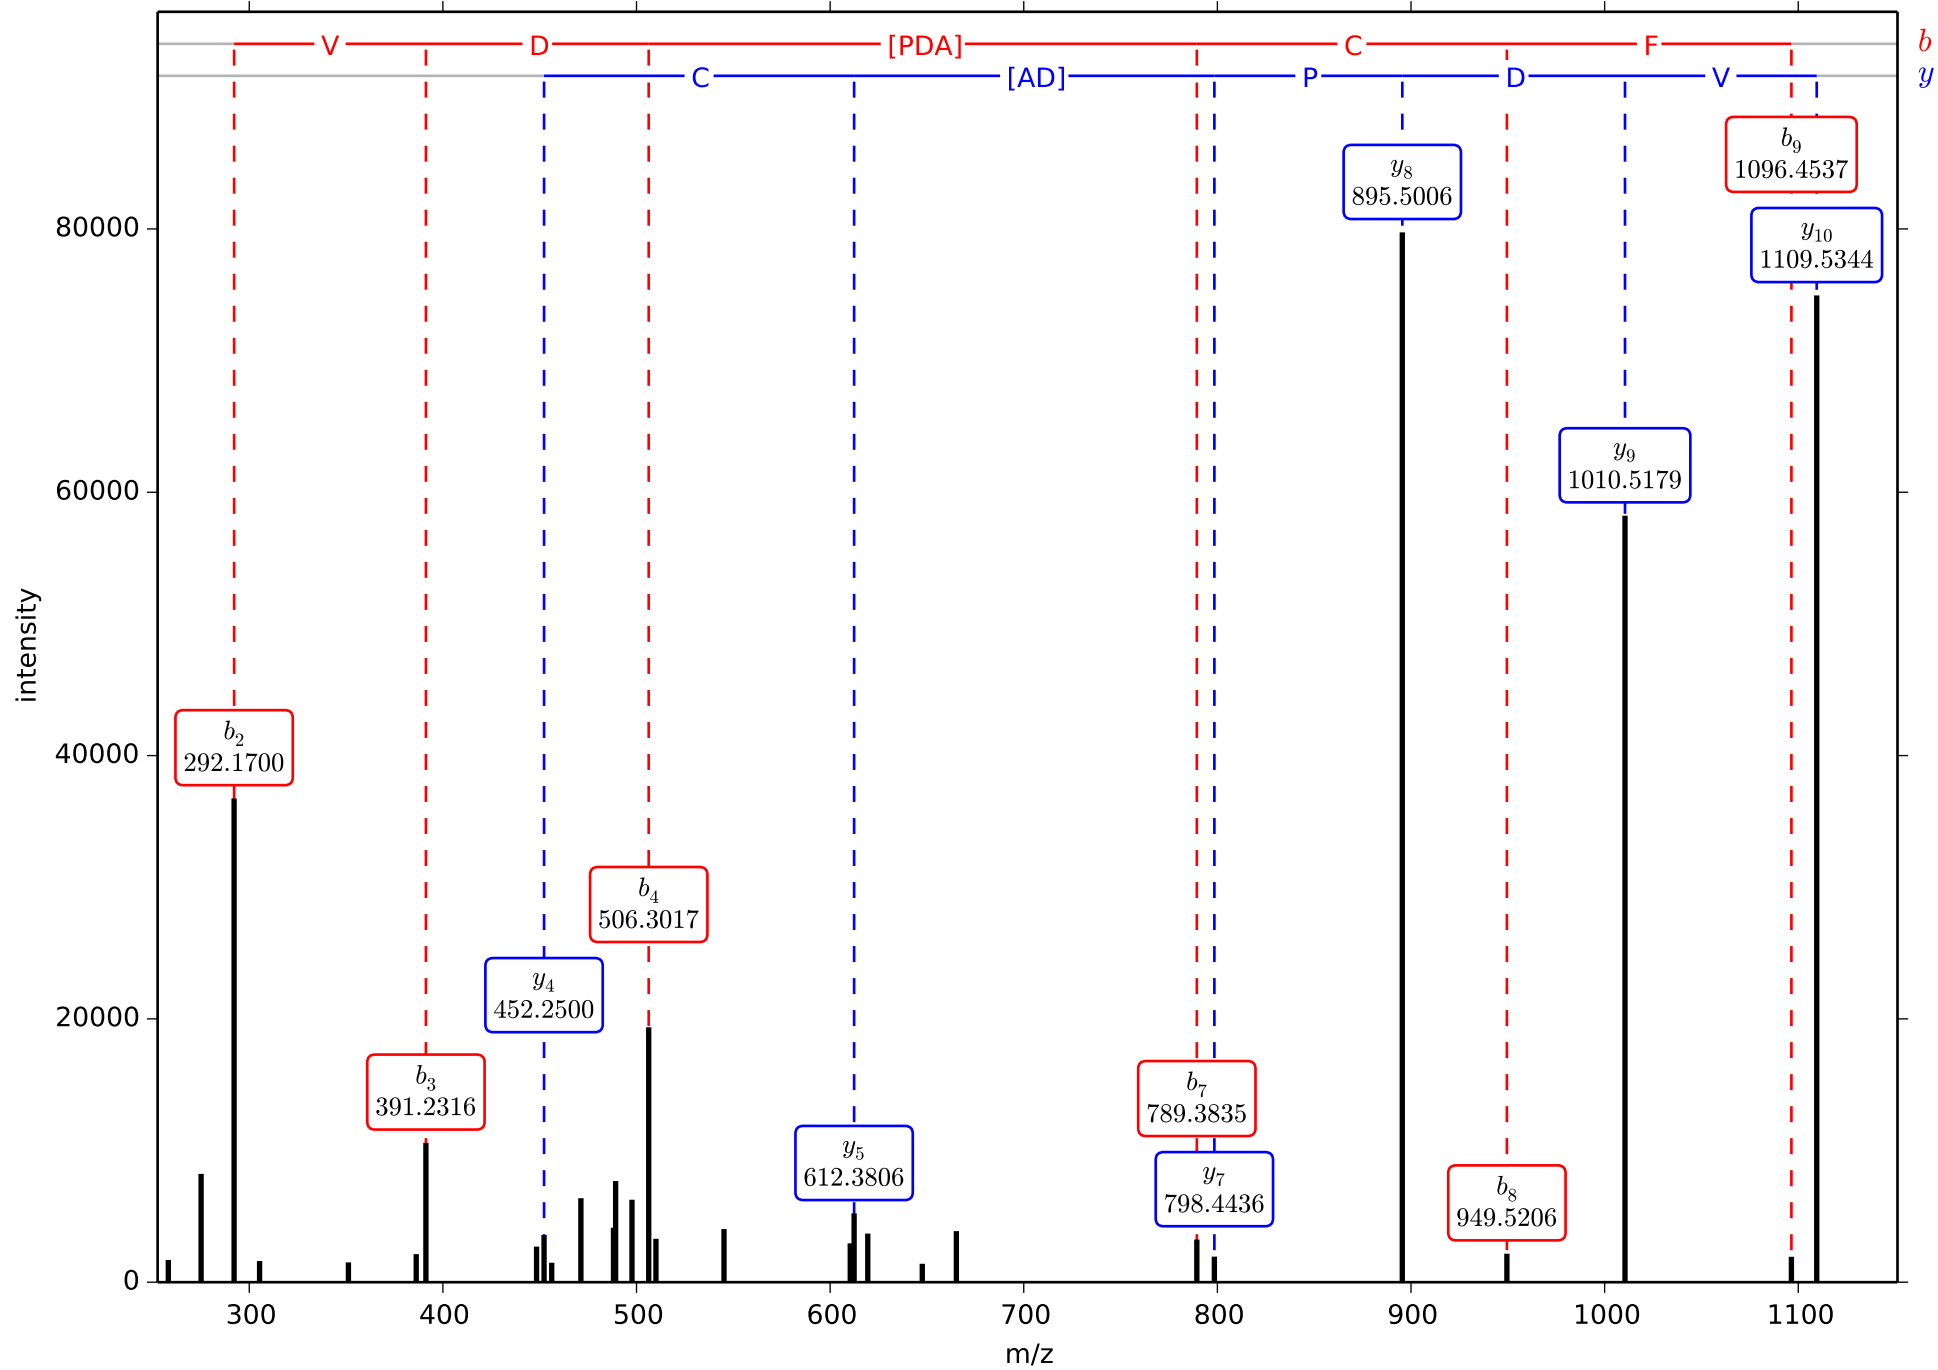



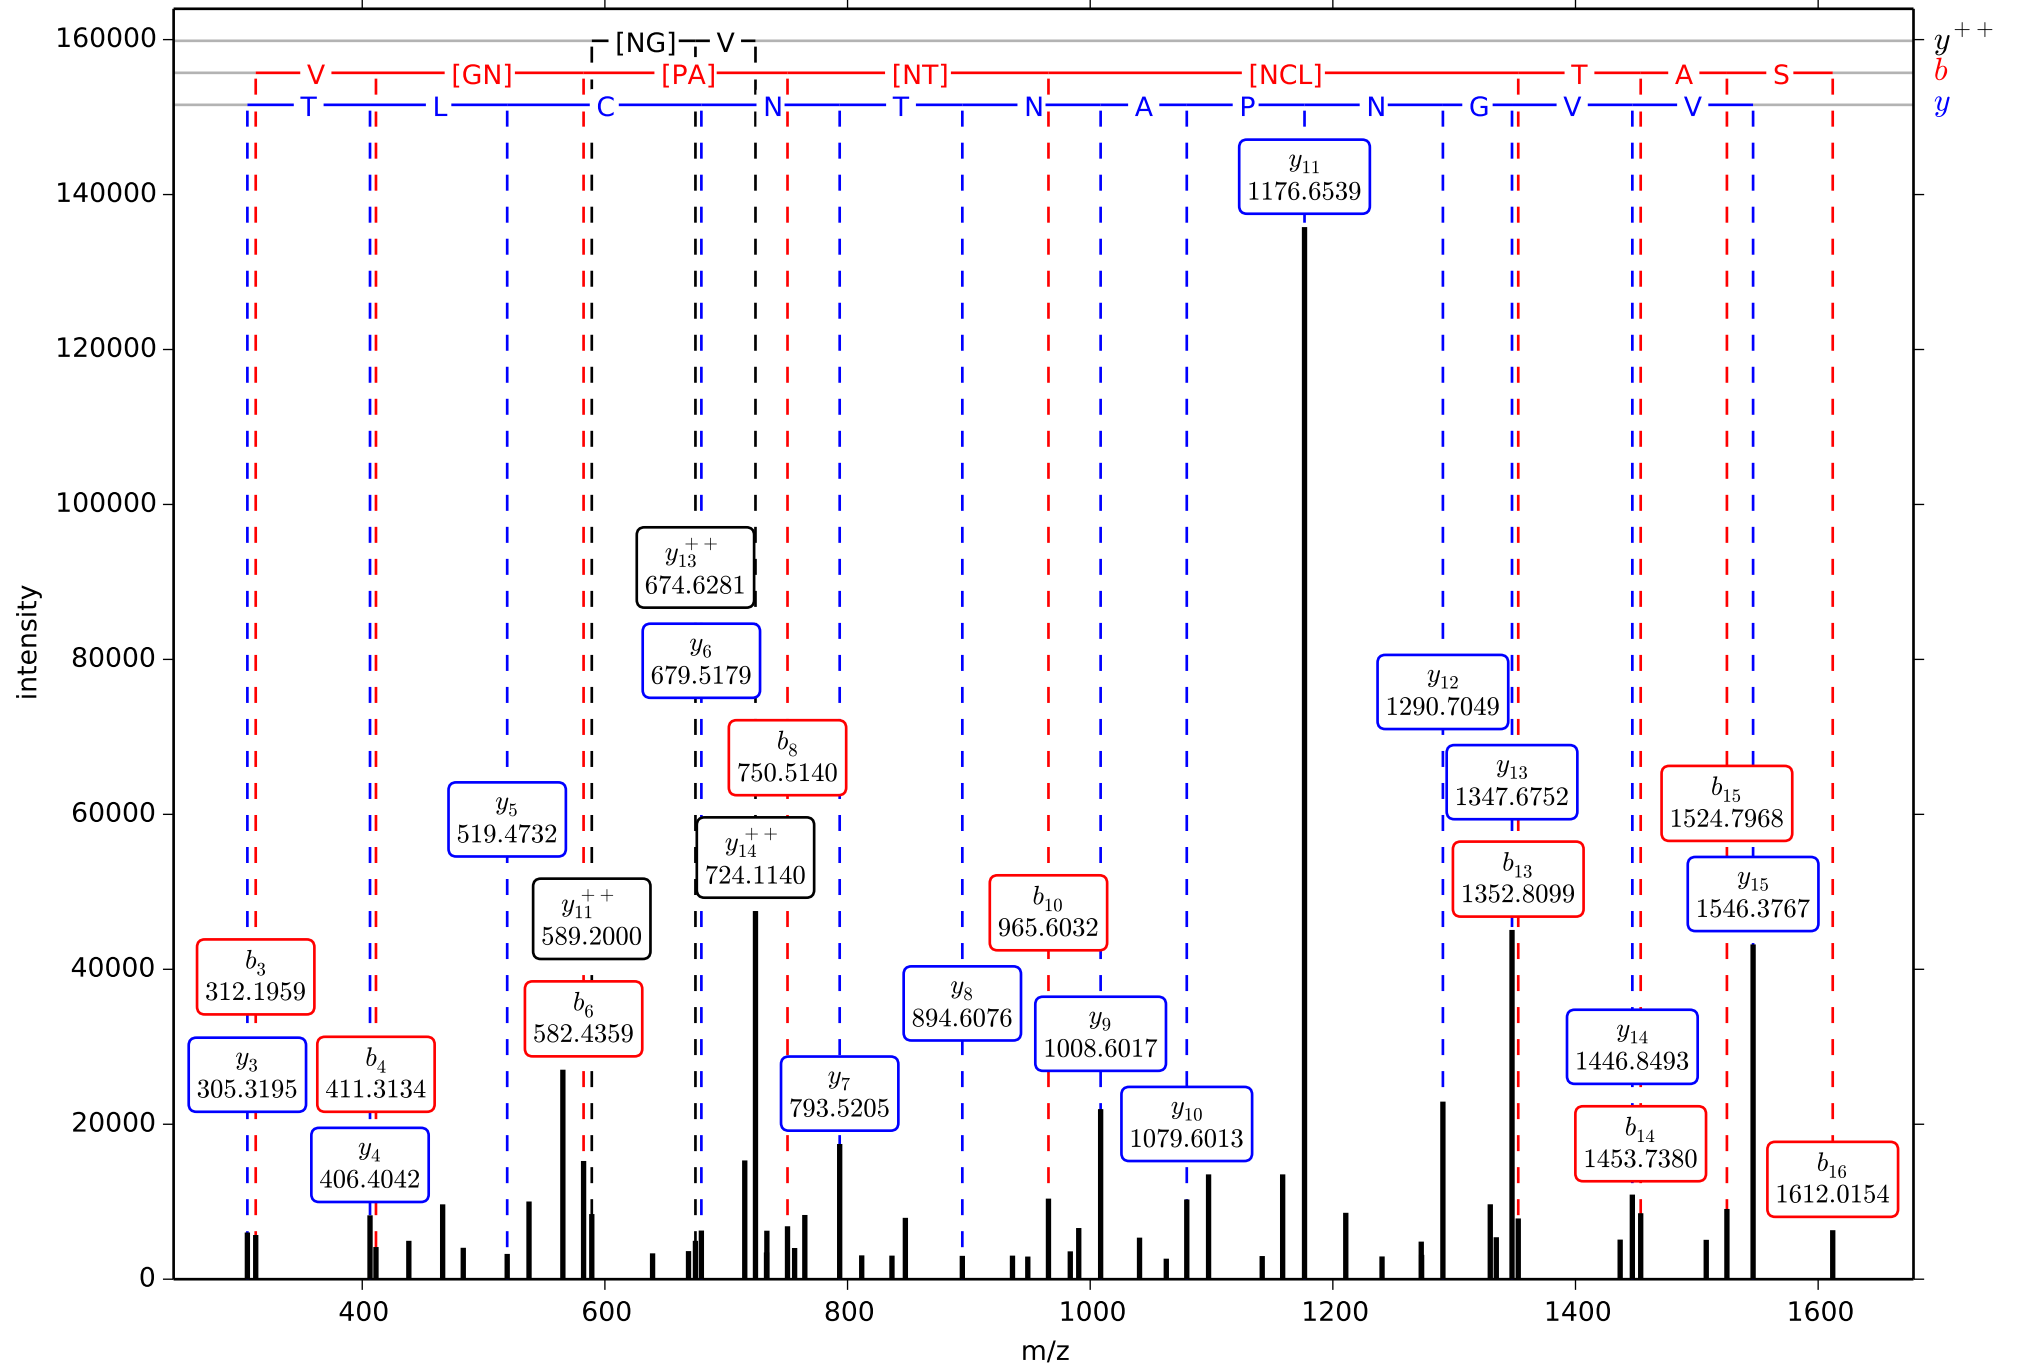

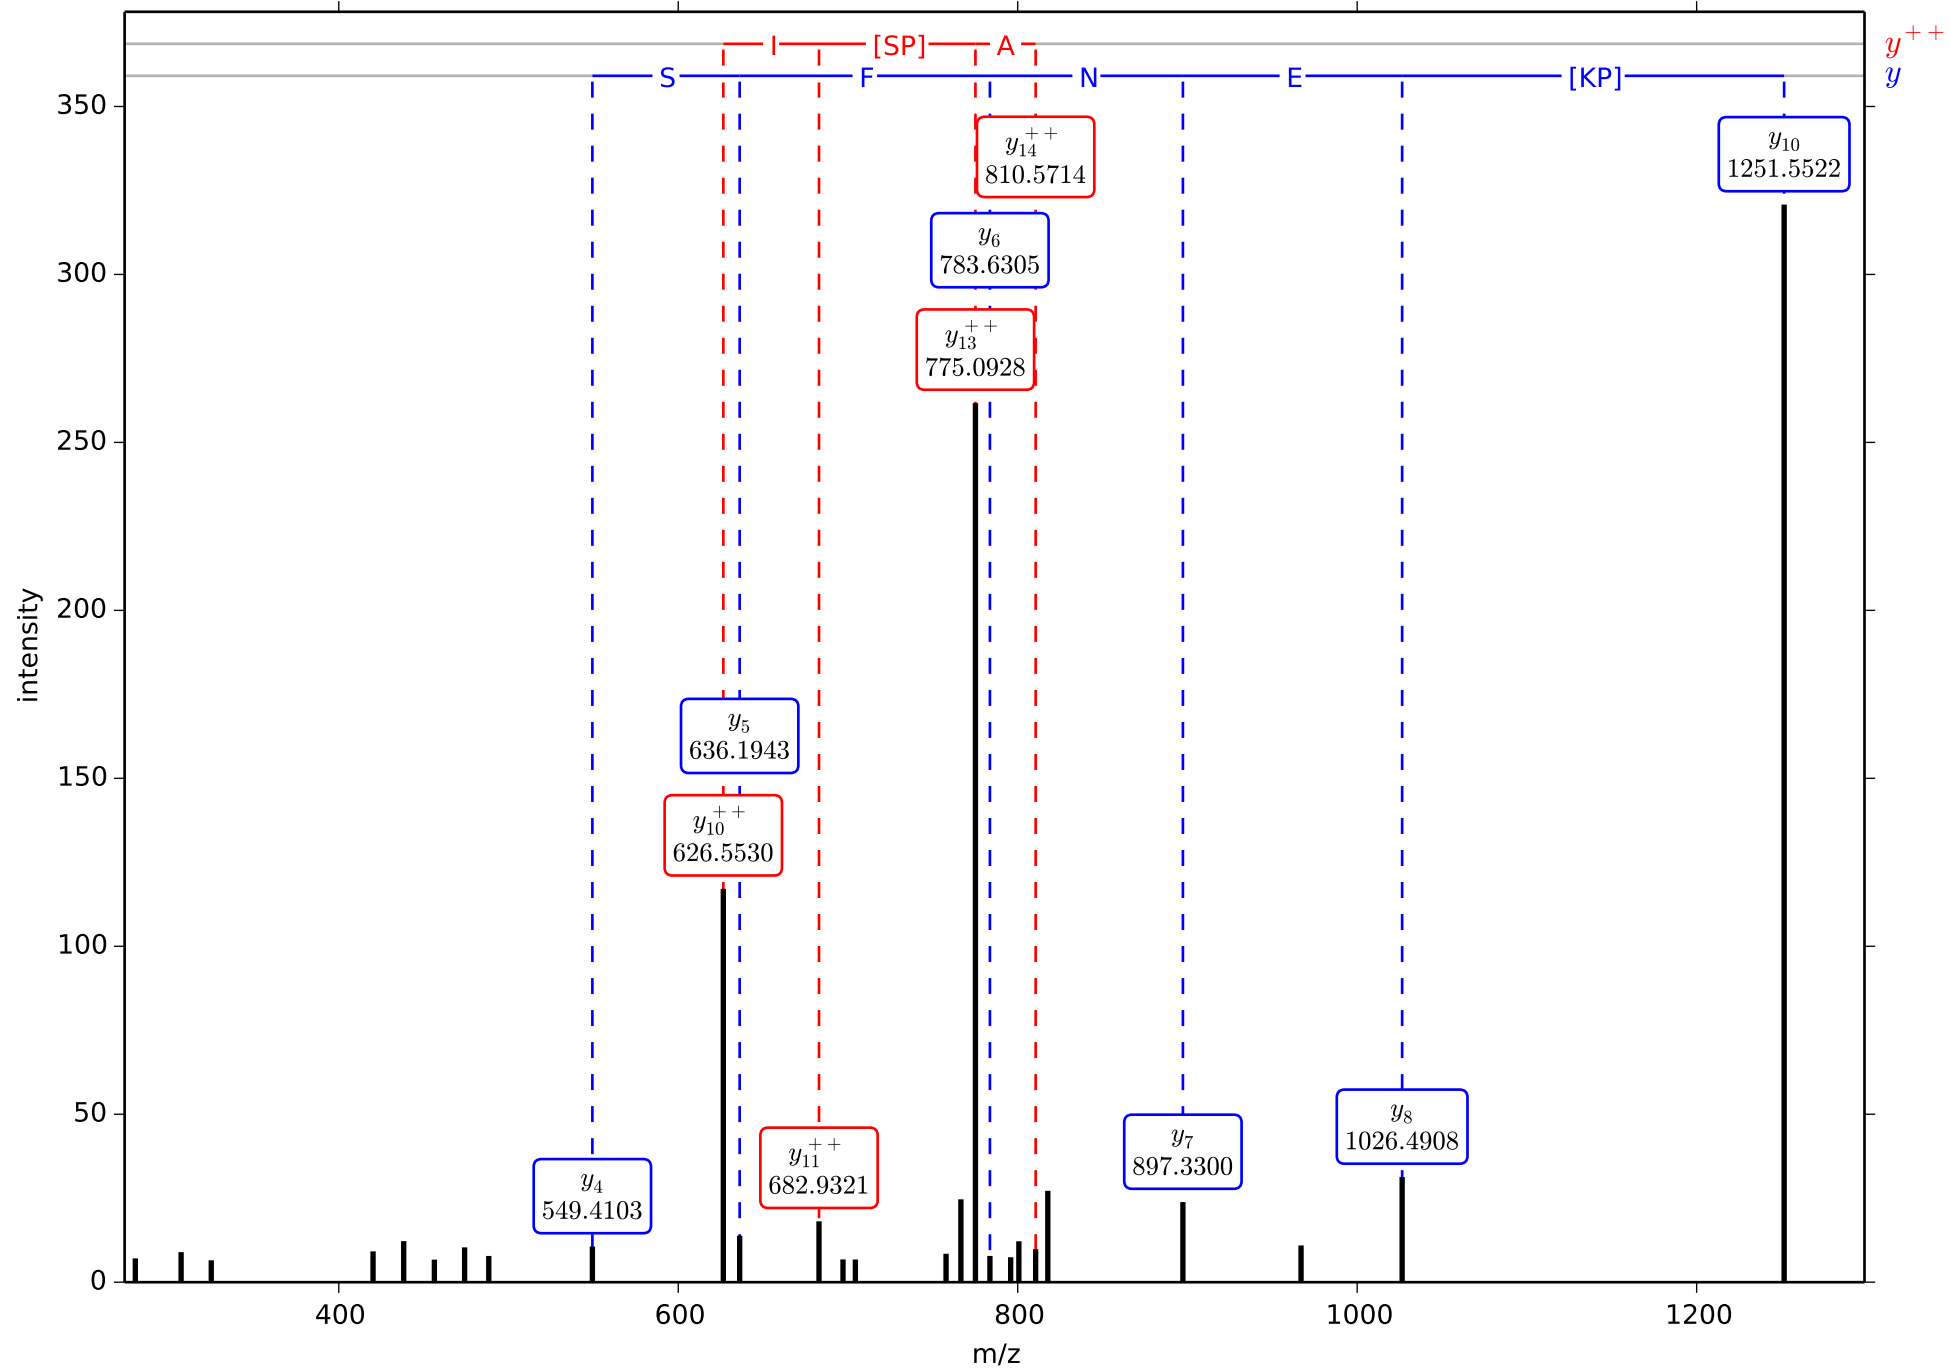

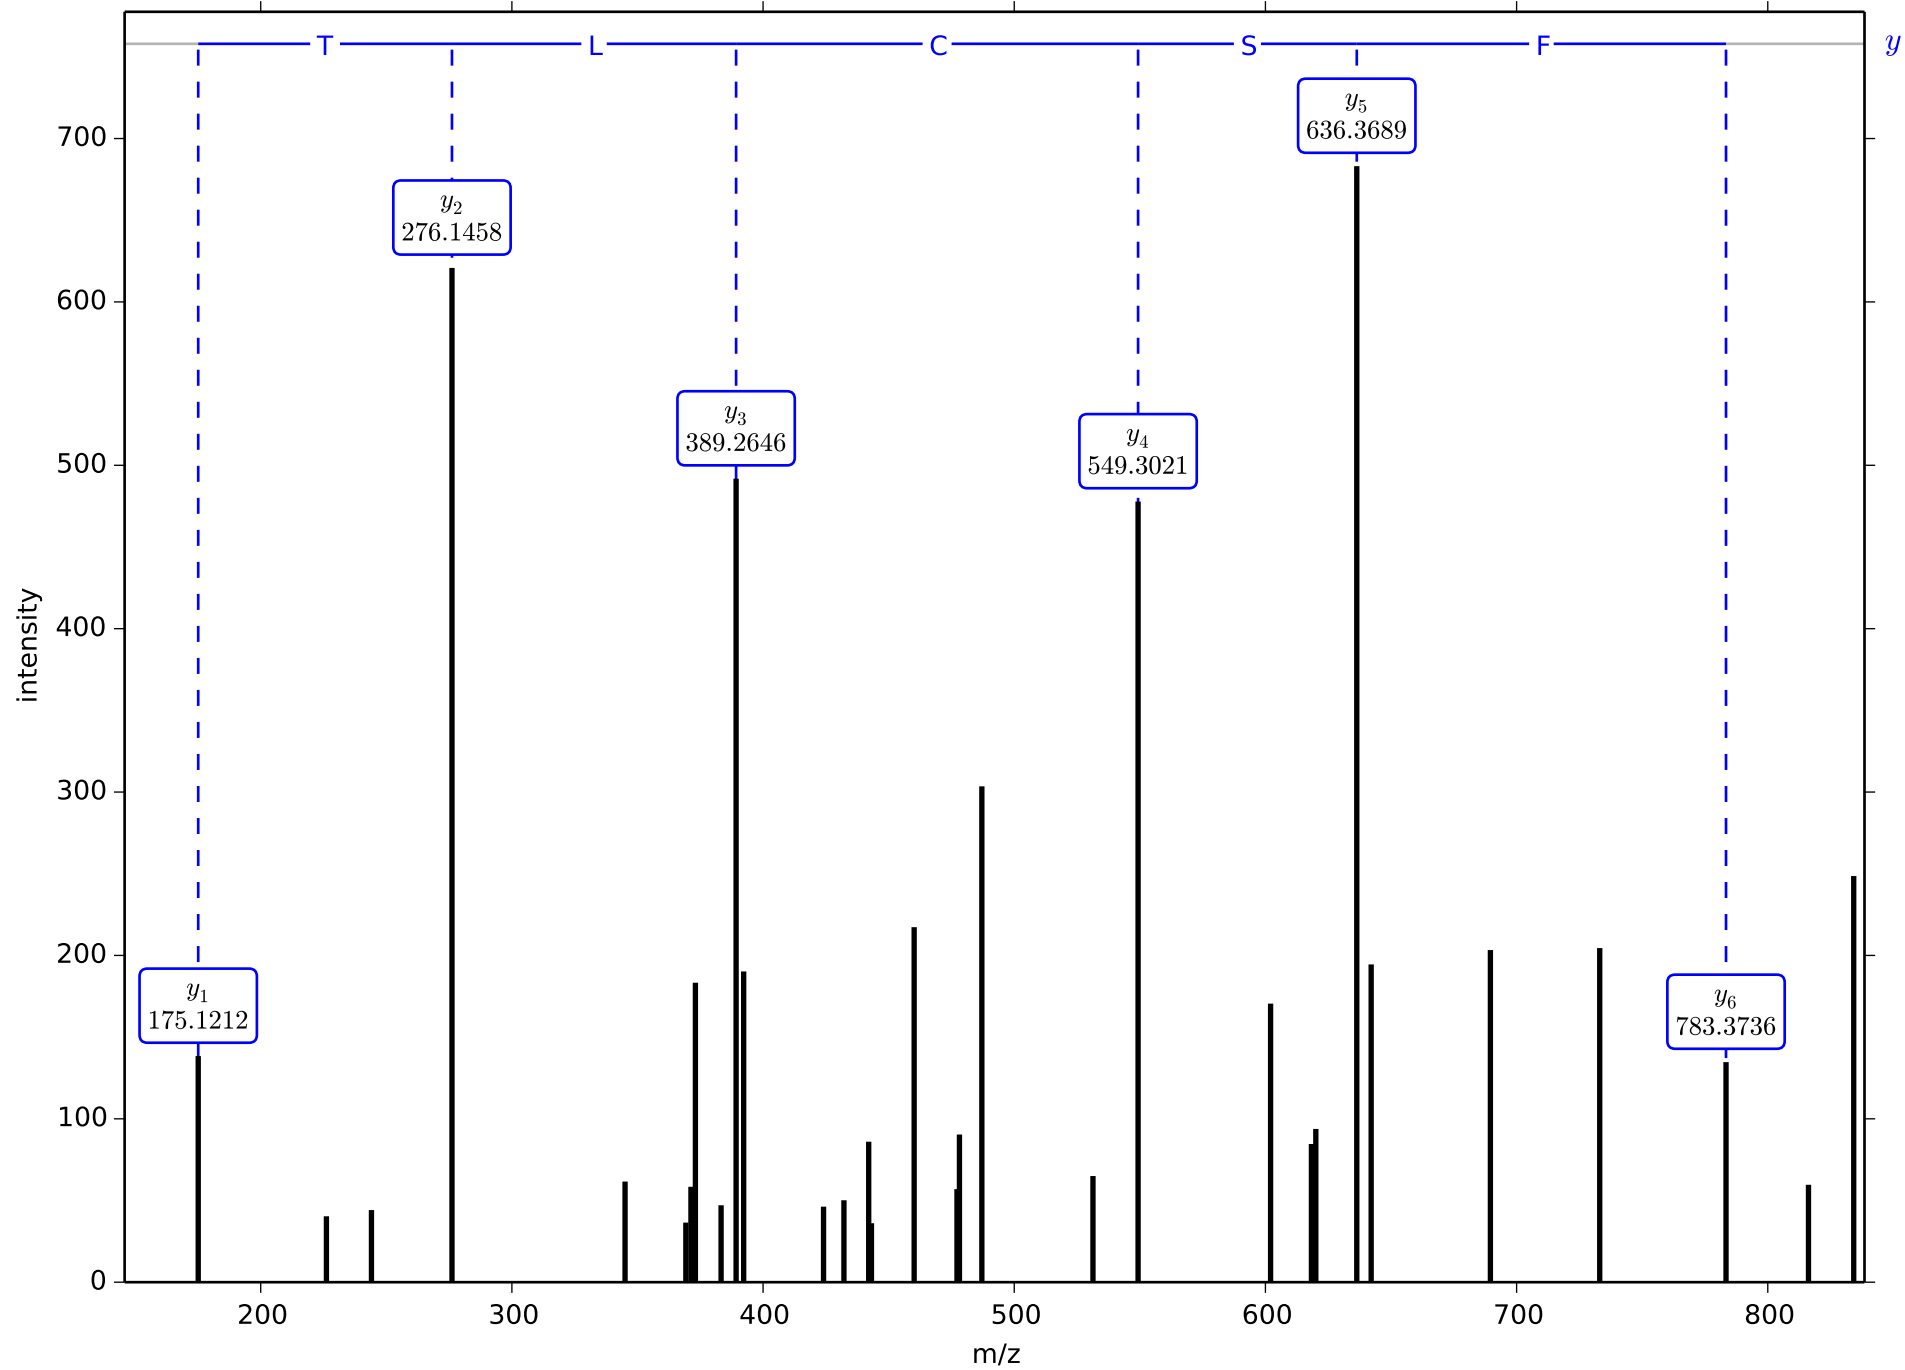

Q04447 : LGYILTCPSNLGTGLR

parent: 867.961410,2+

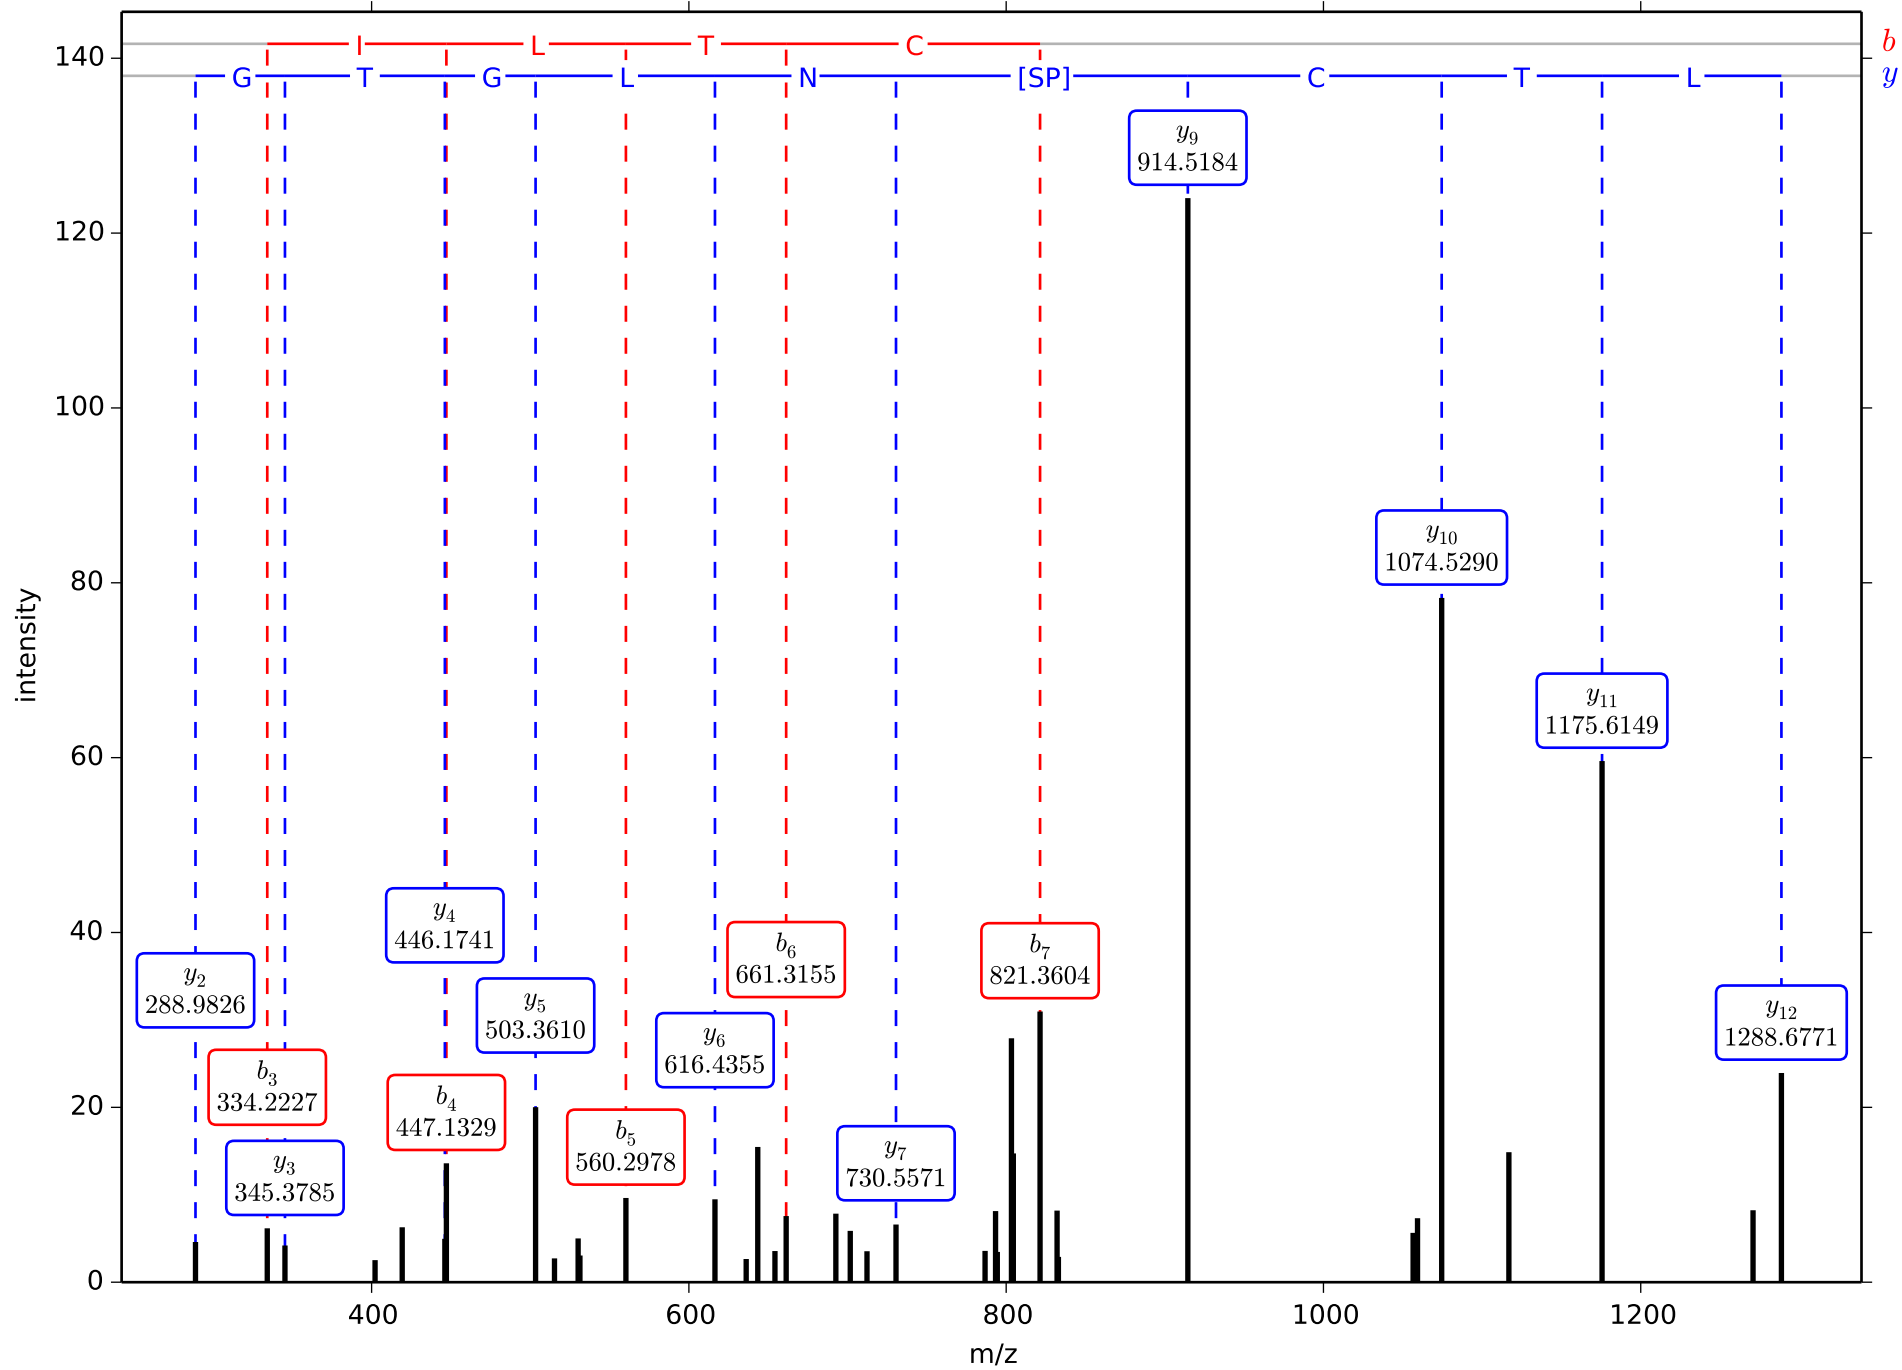

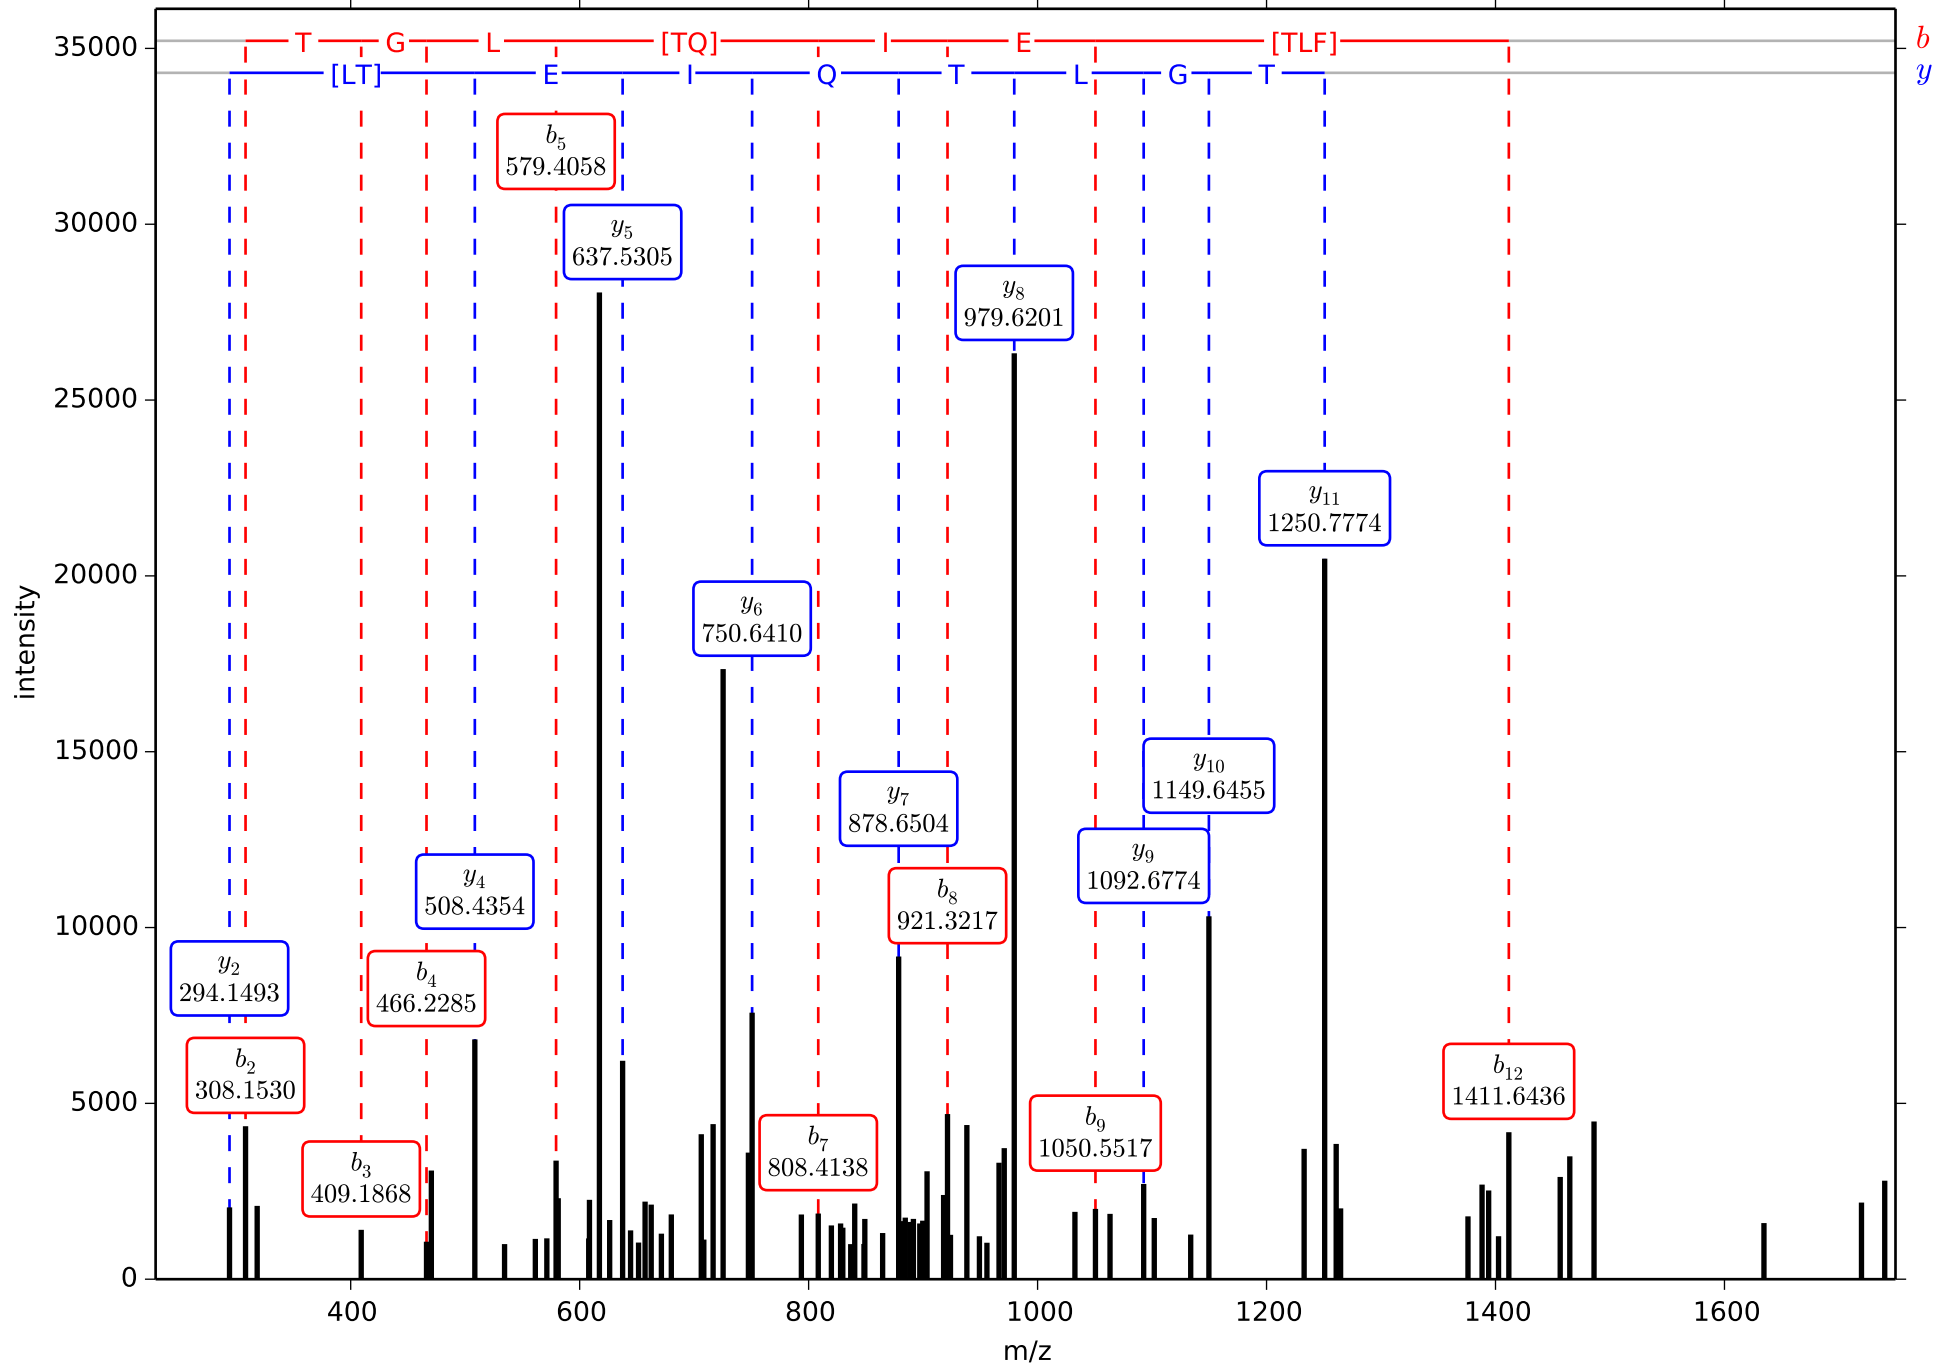

P62717 : SSGEIVYCGQVFEK

parent: 801.874310,2+

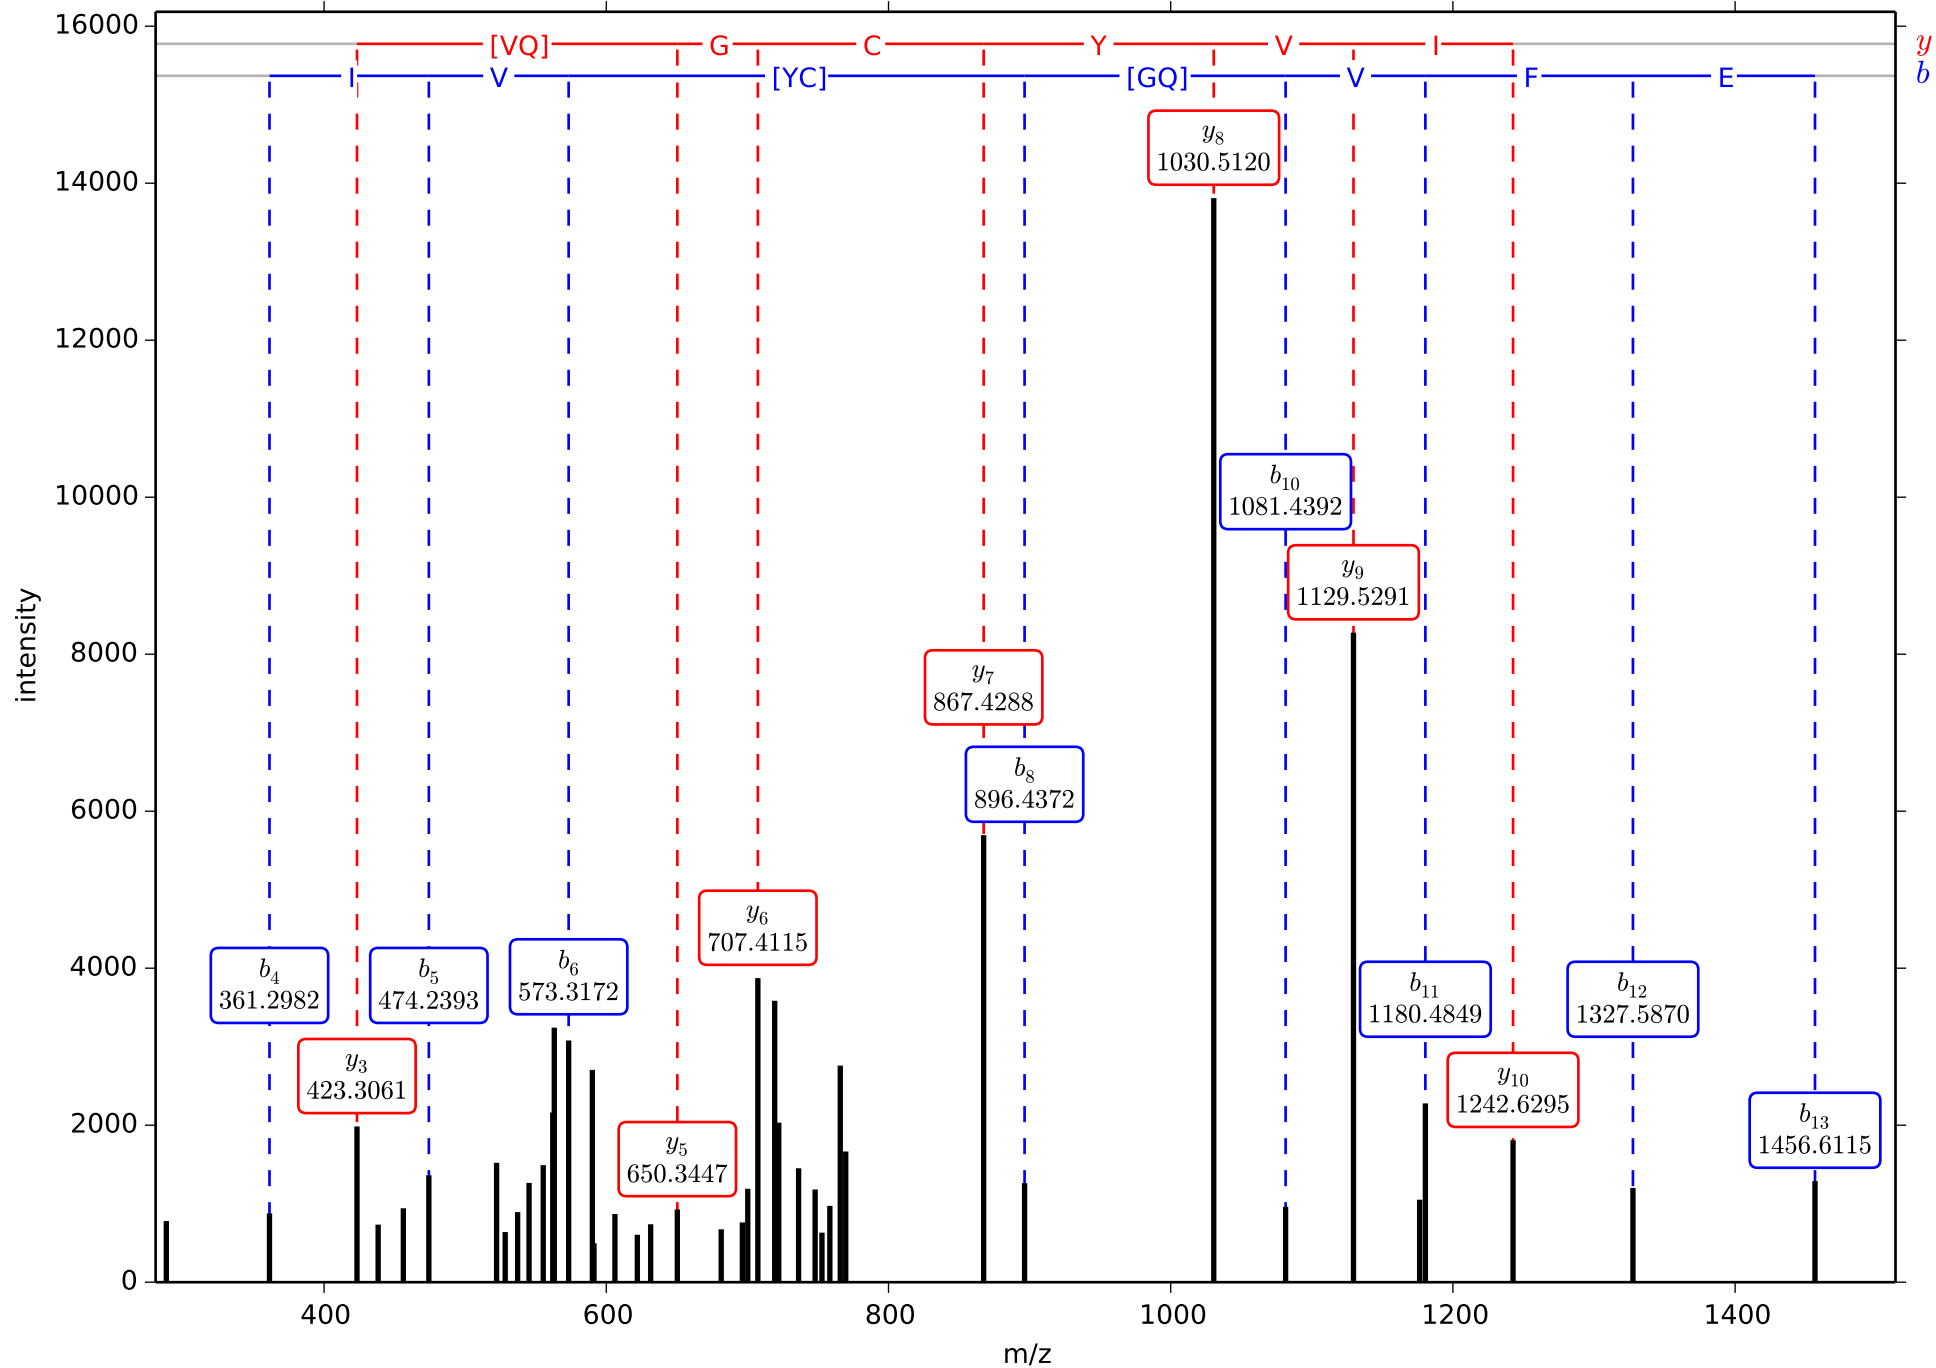

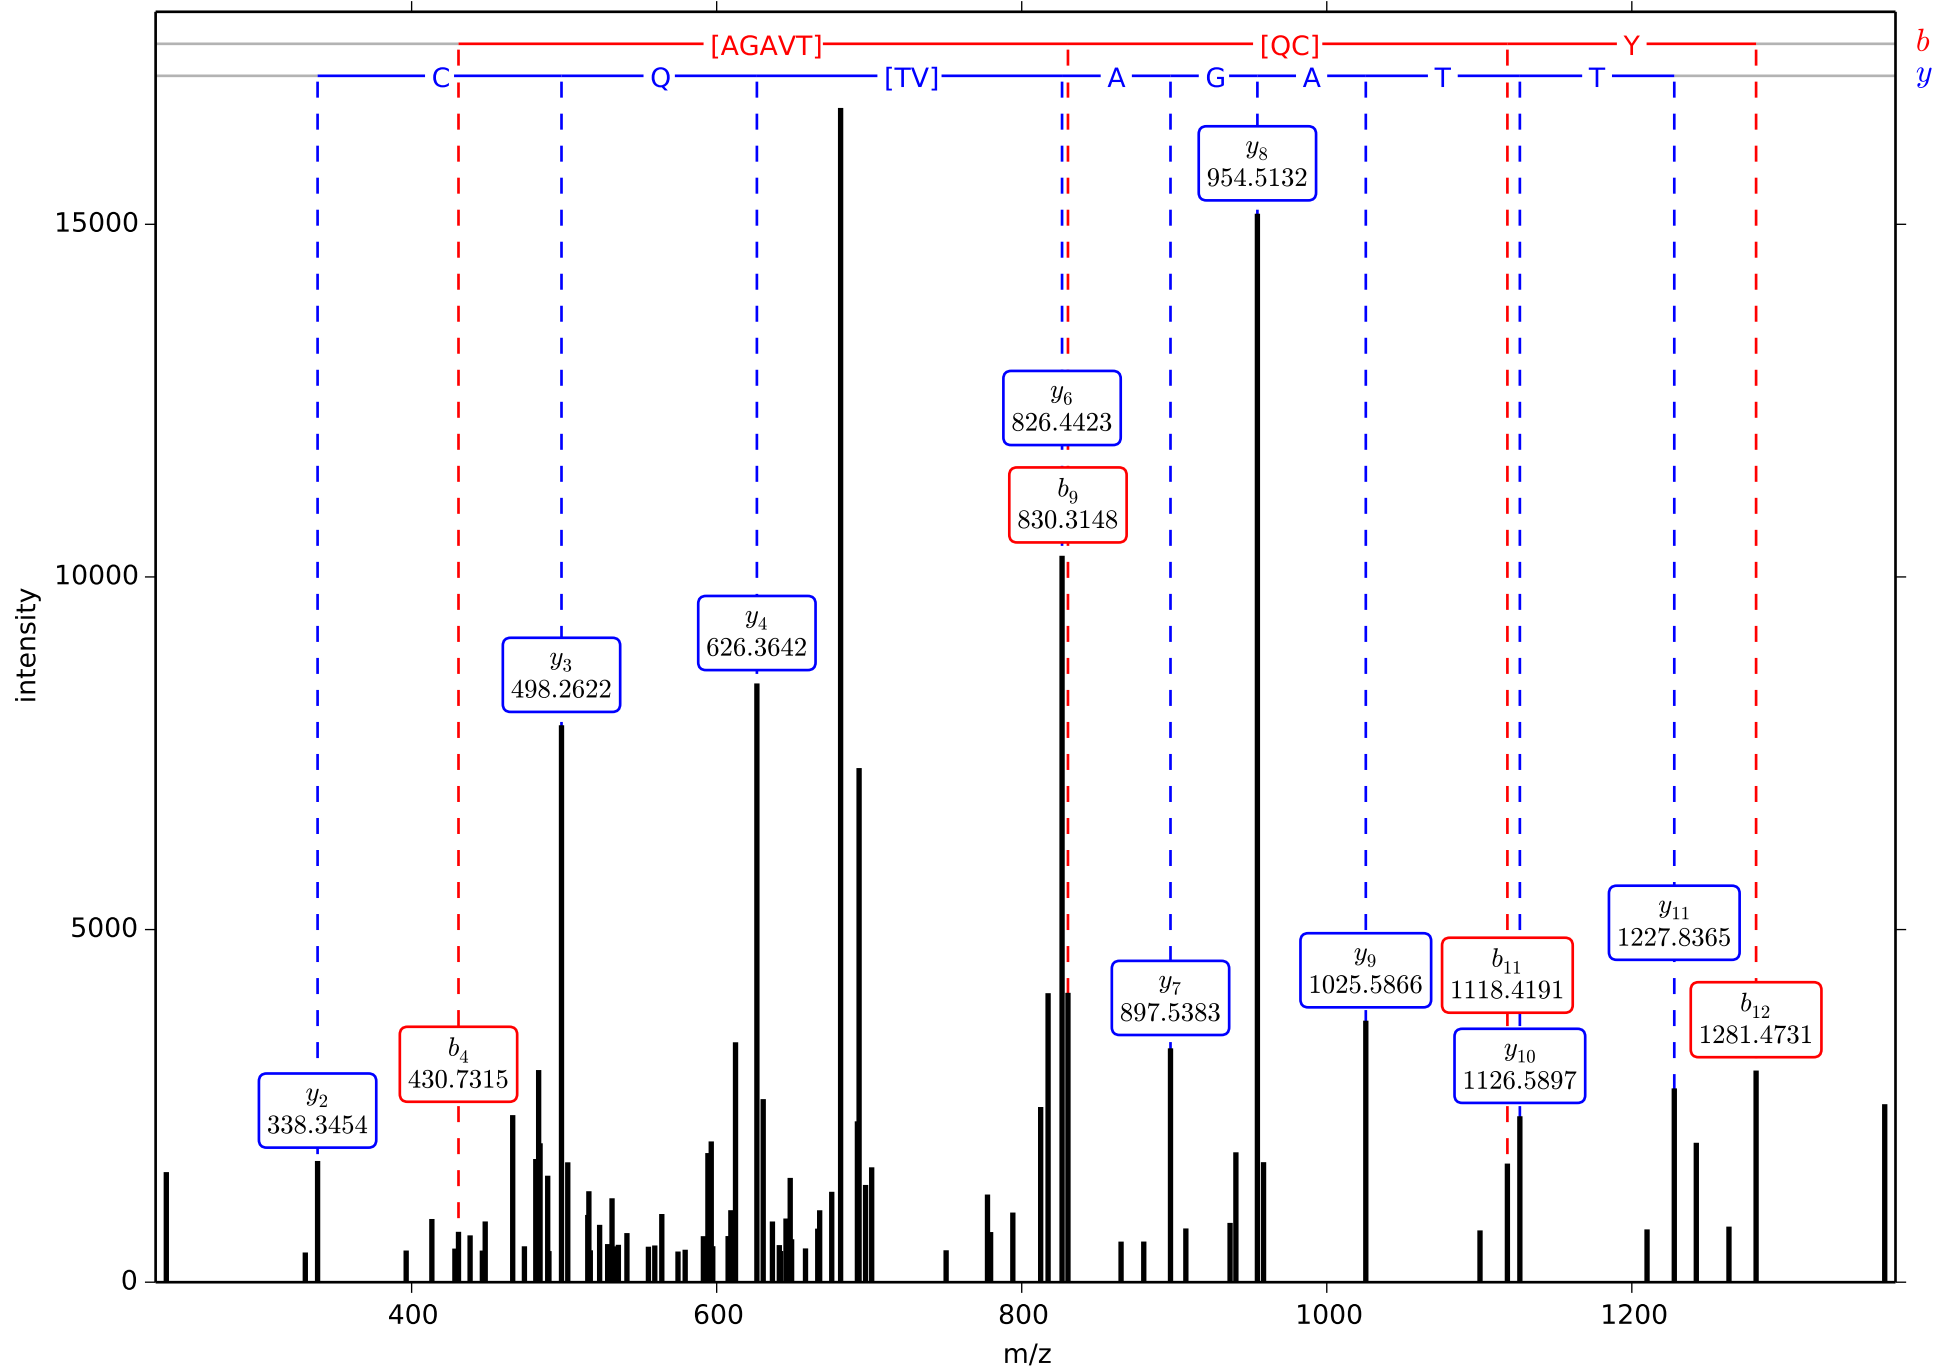

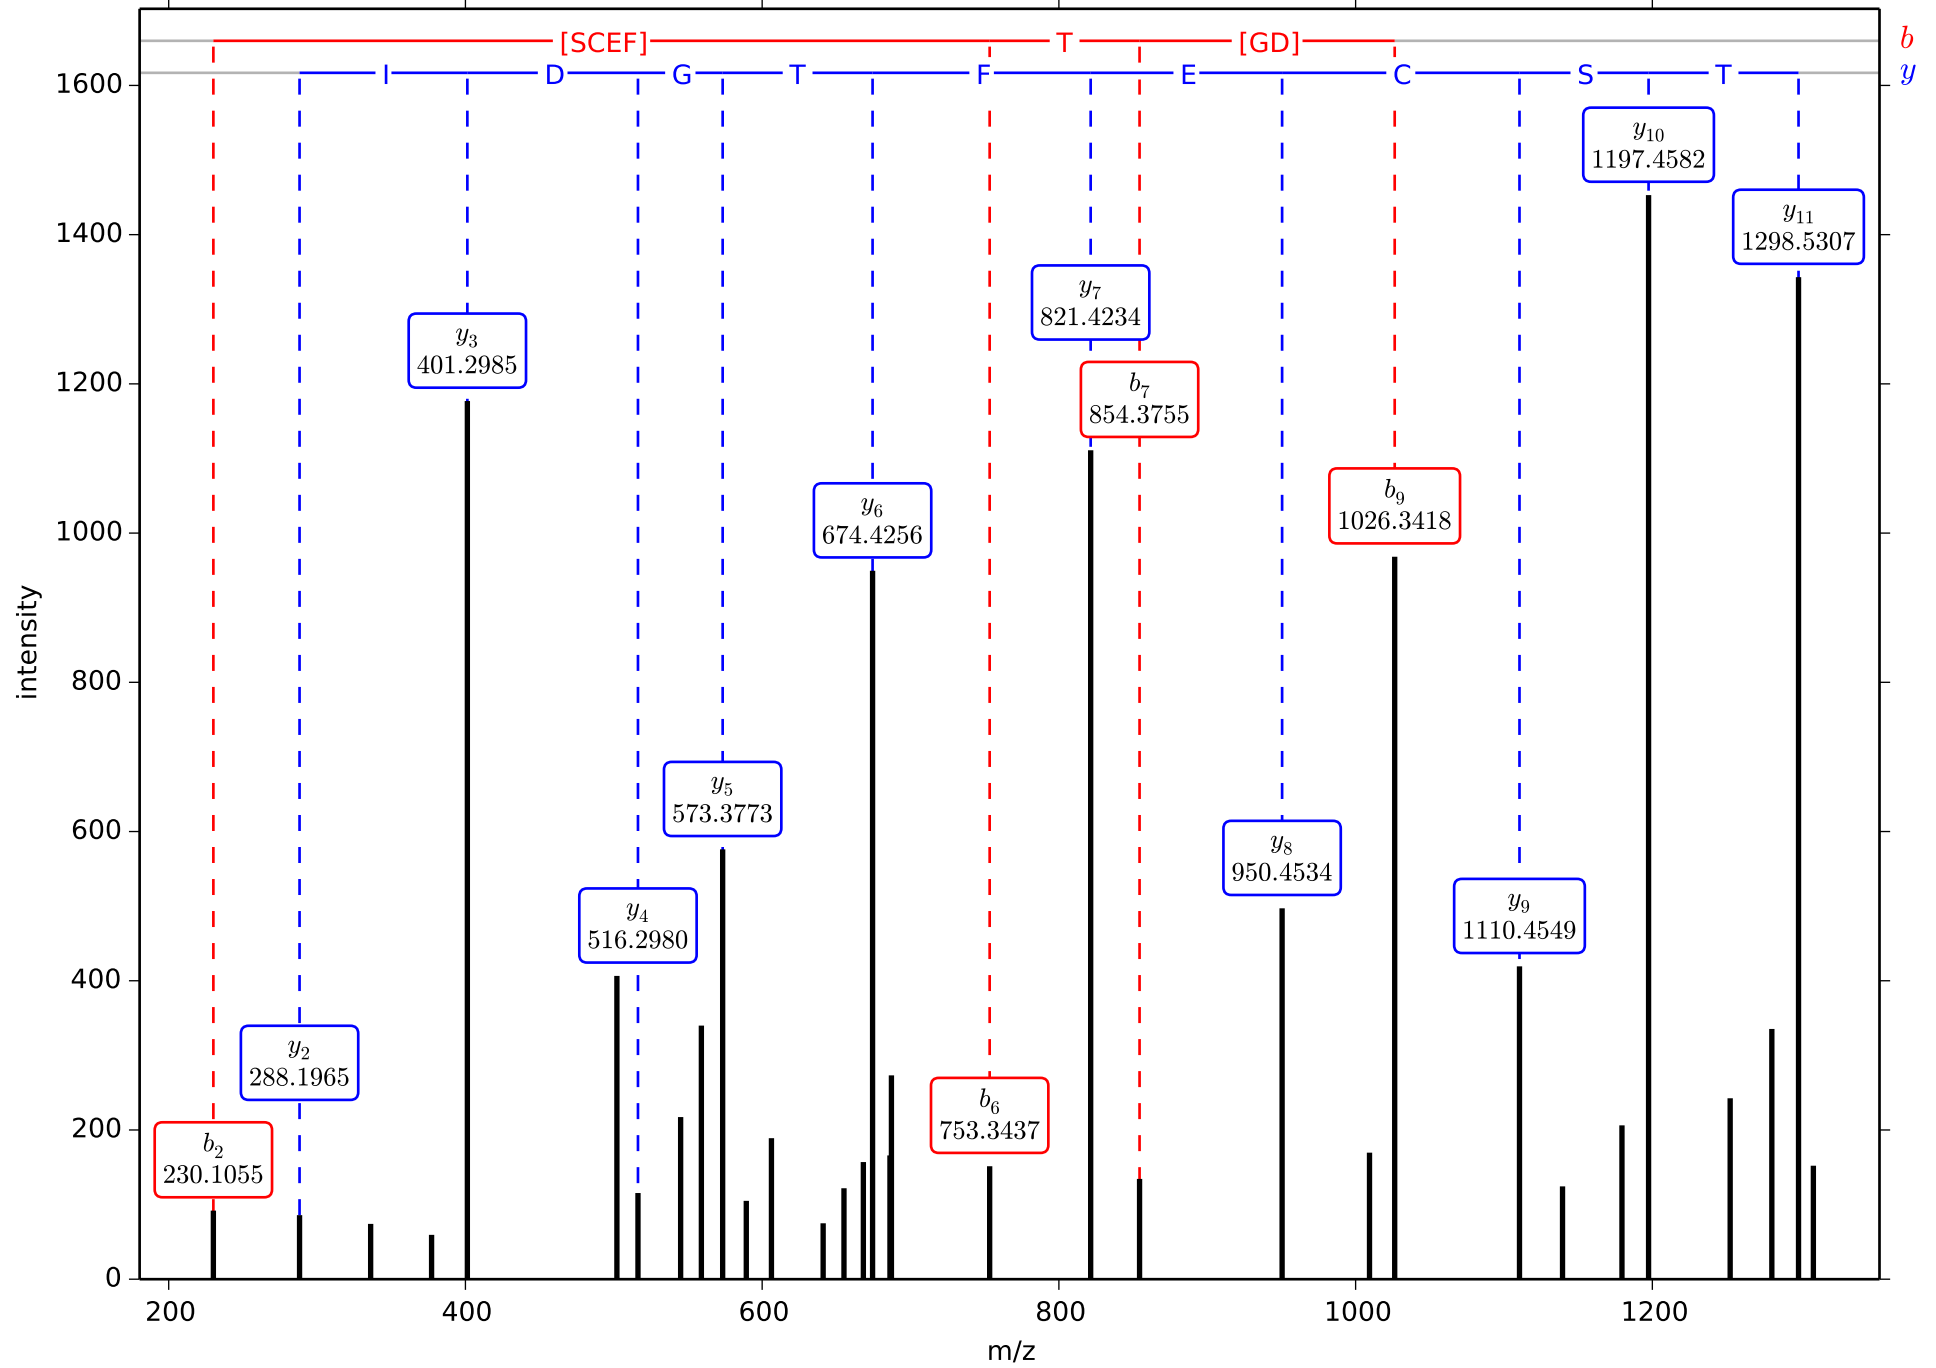



P62814 : LALTTAEFLAYQCEK

parent: 879.442240,2+

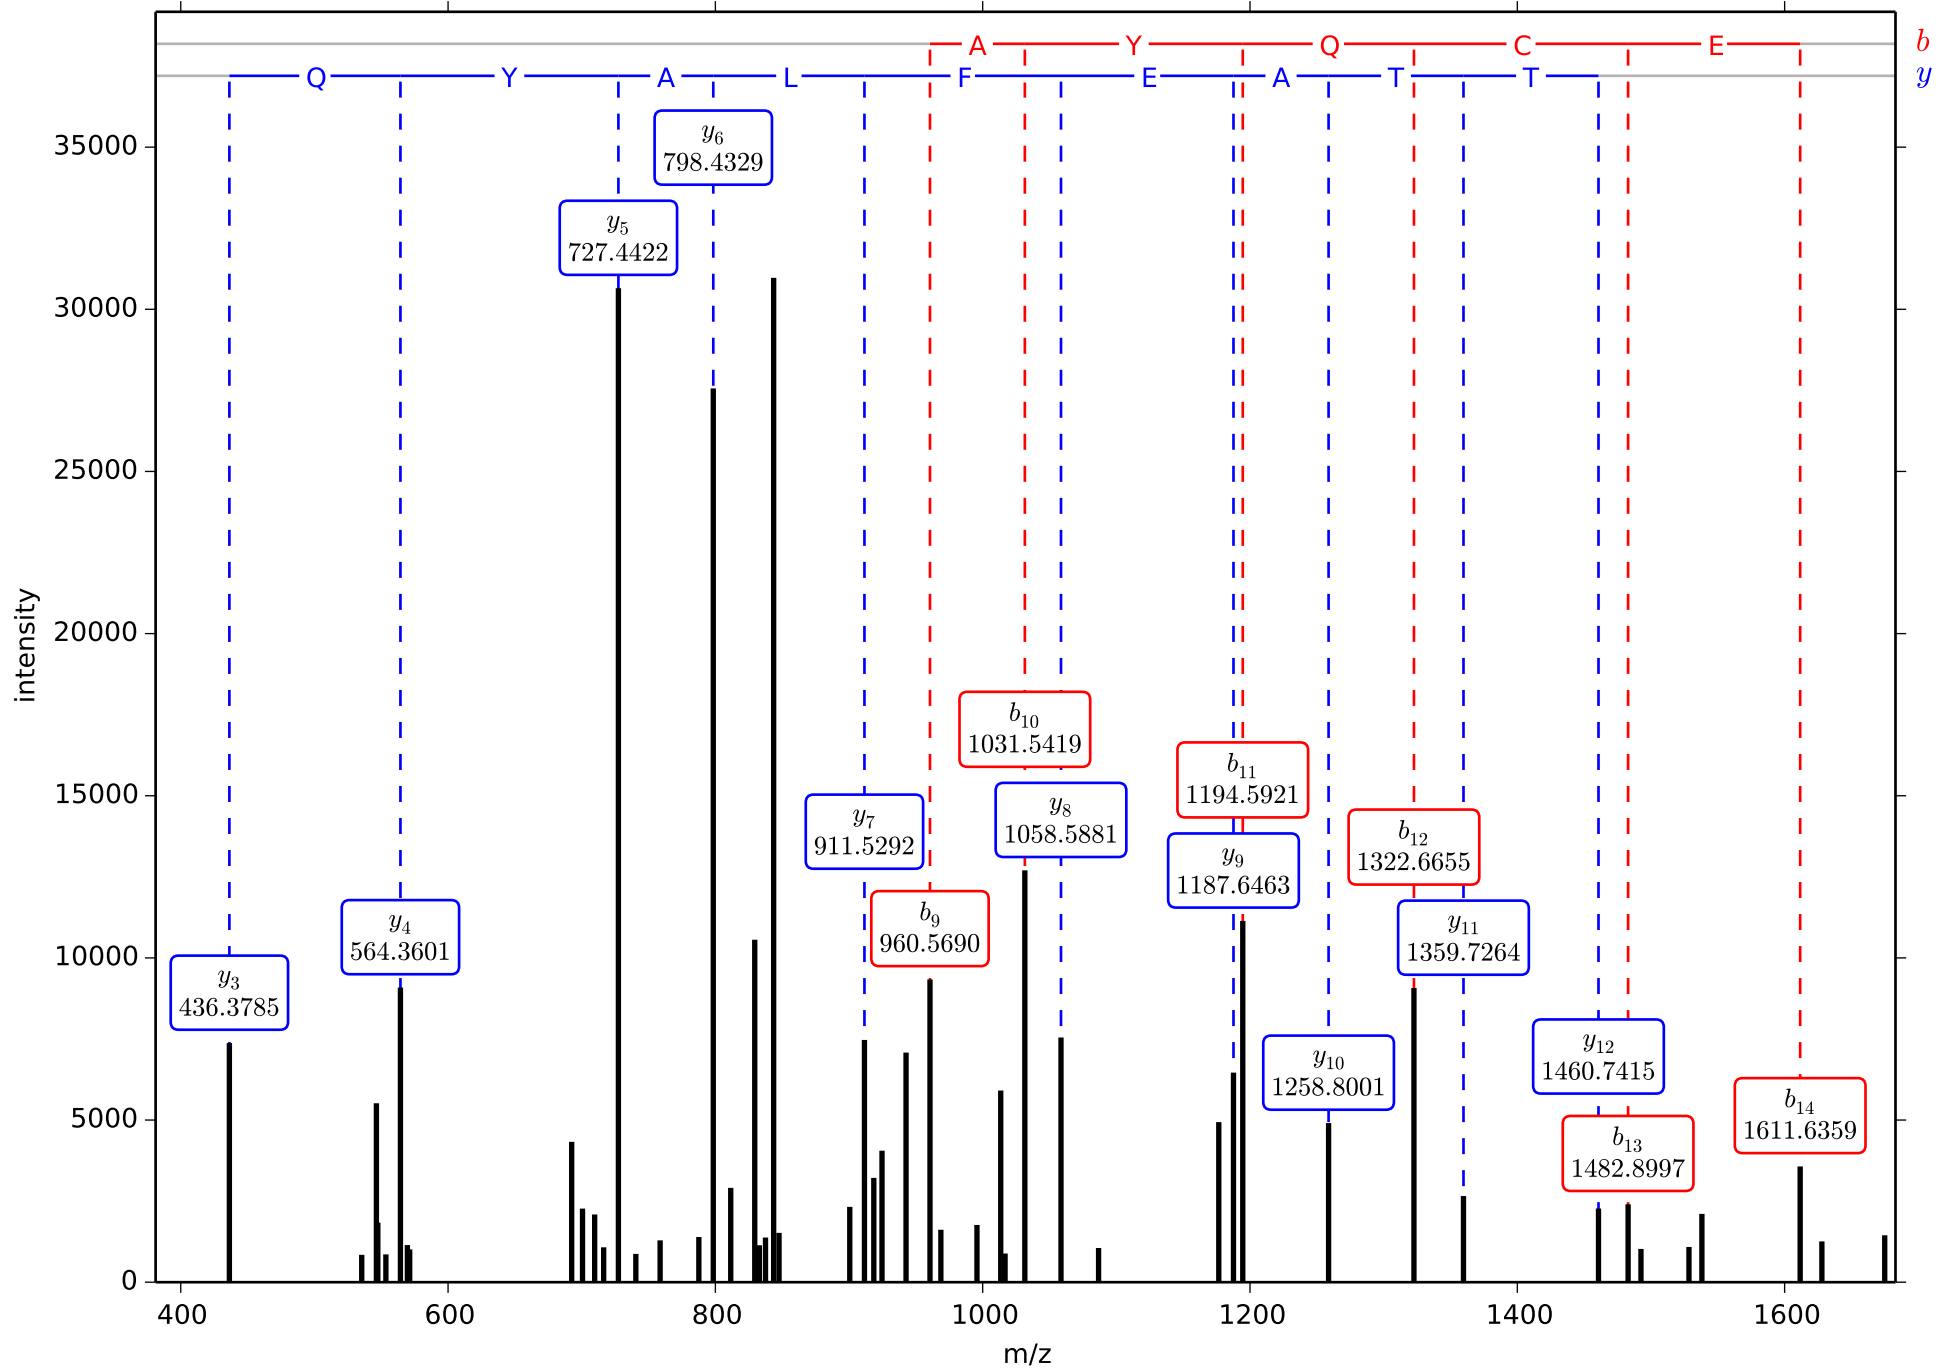

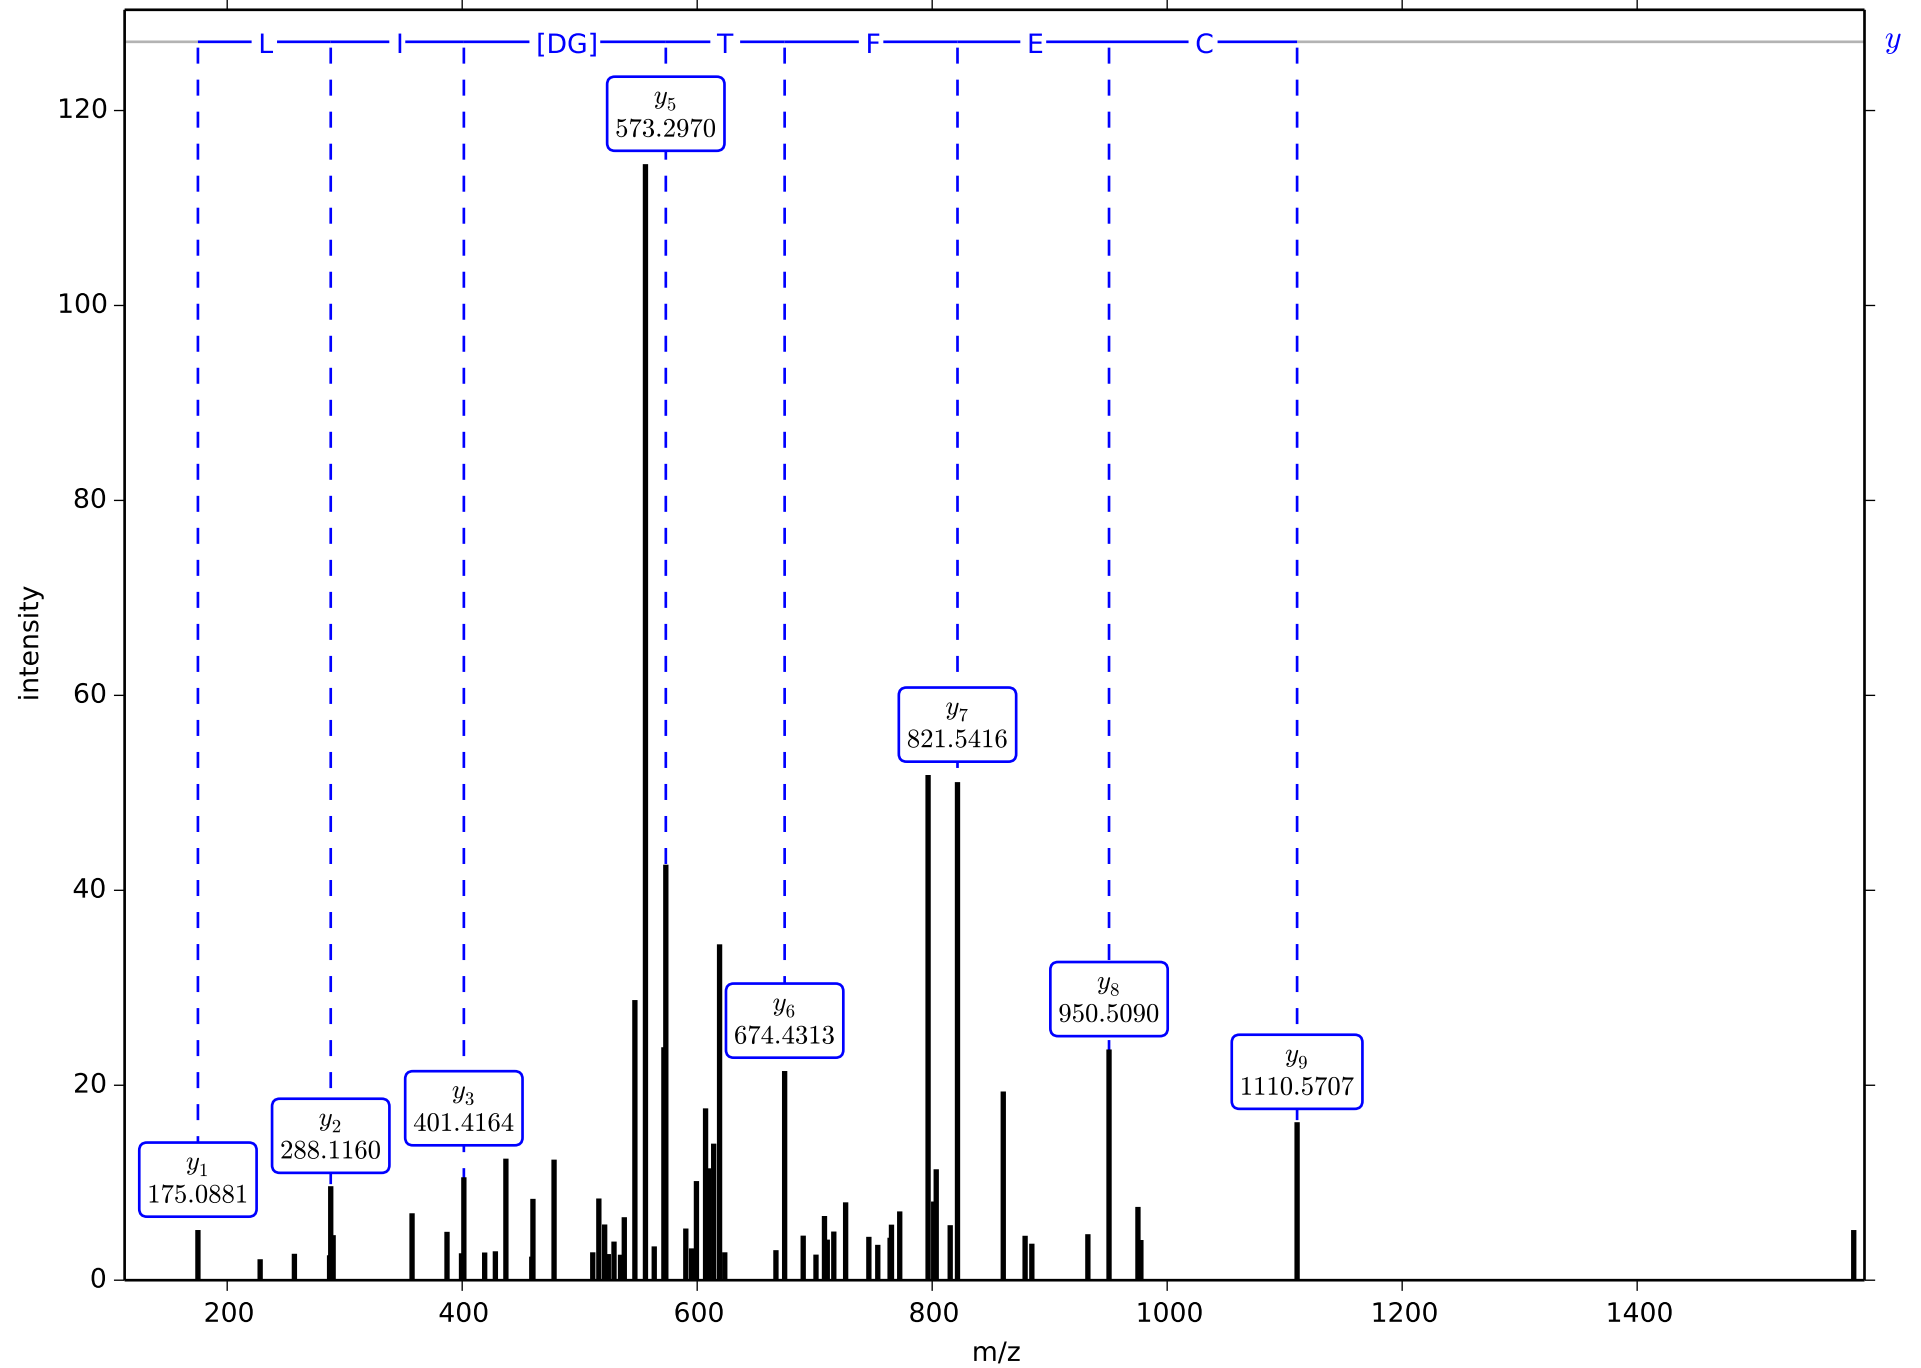

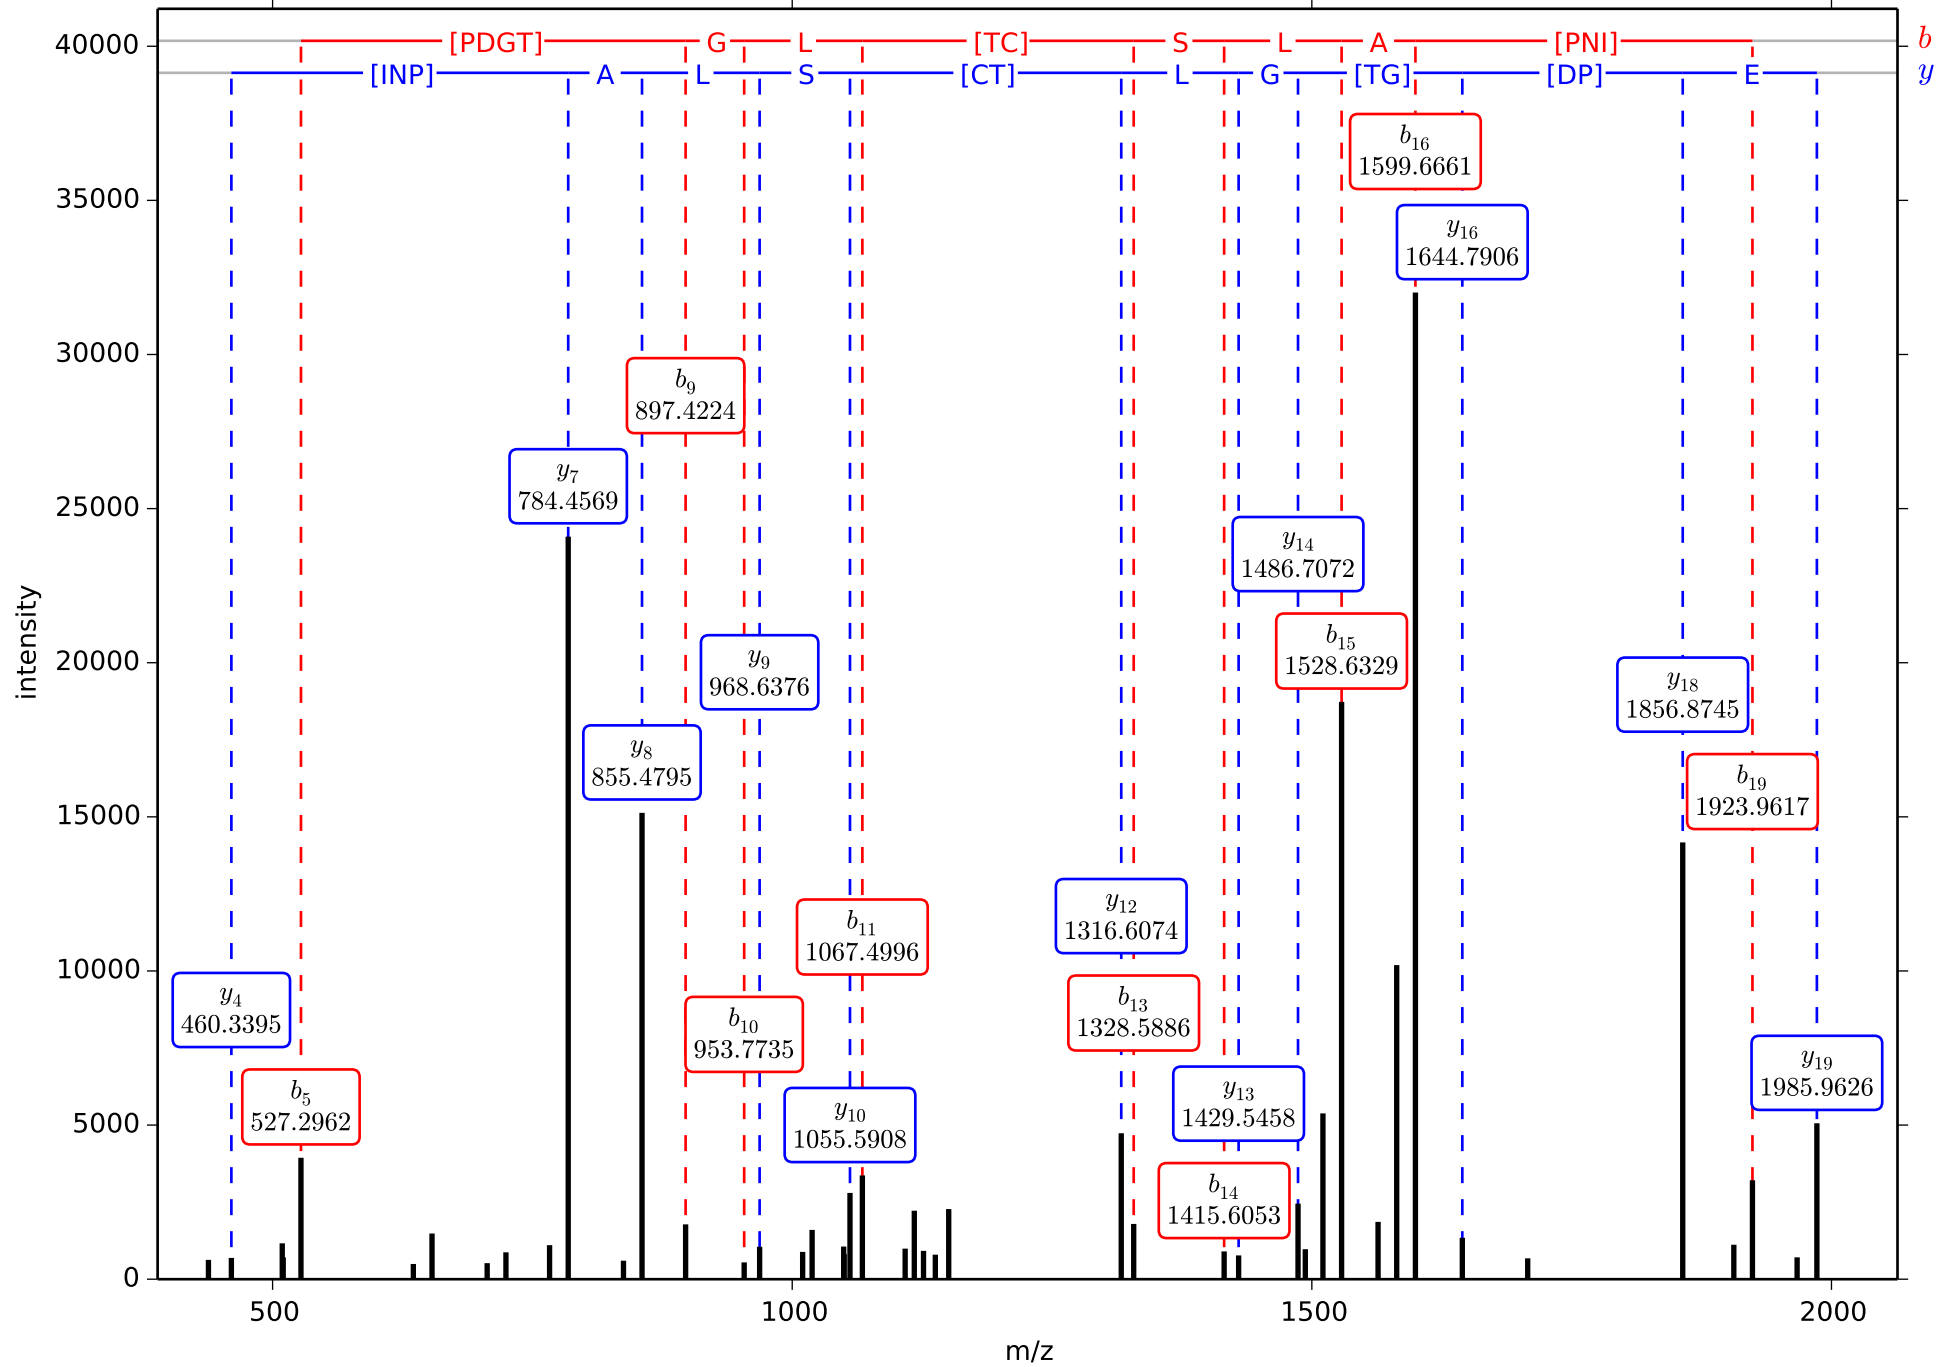

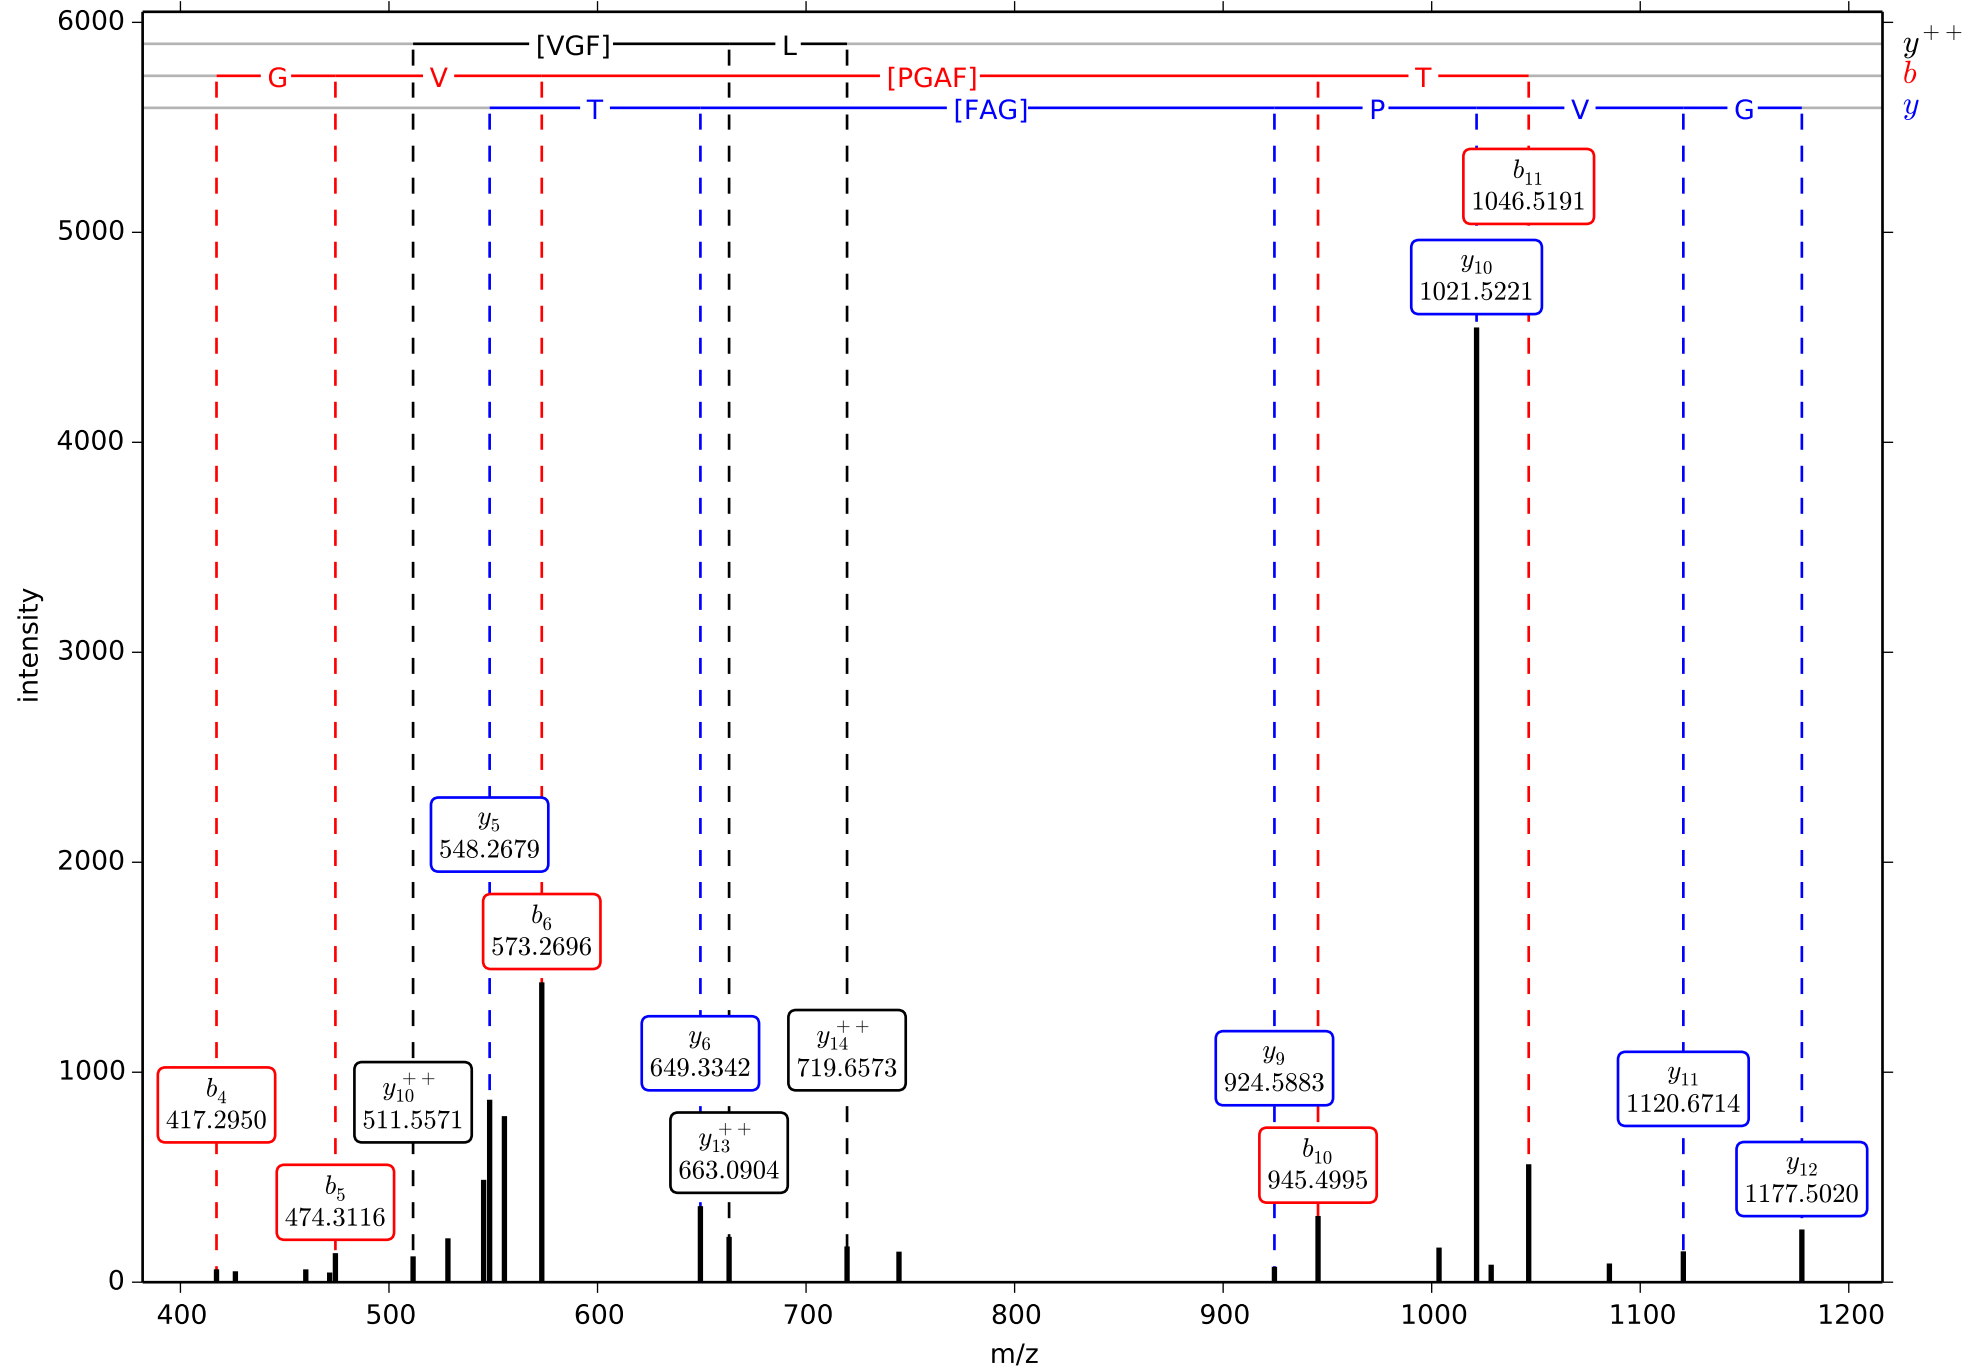

P60710 : LCYVALDFEQEMATAASSSSLEK

parent: 1275.592700,2+

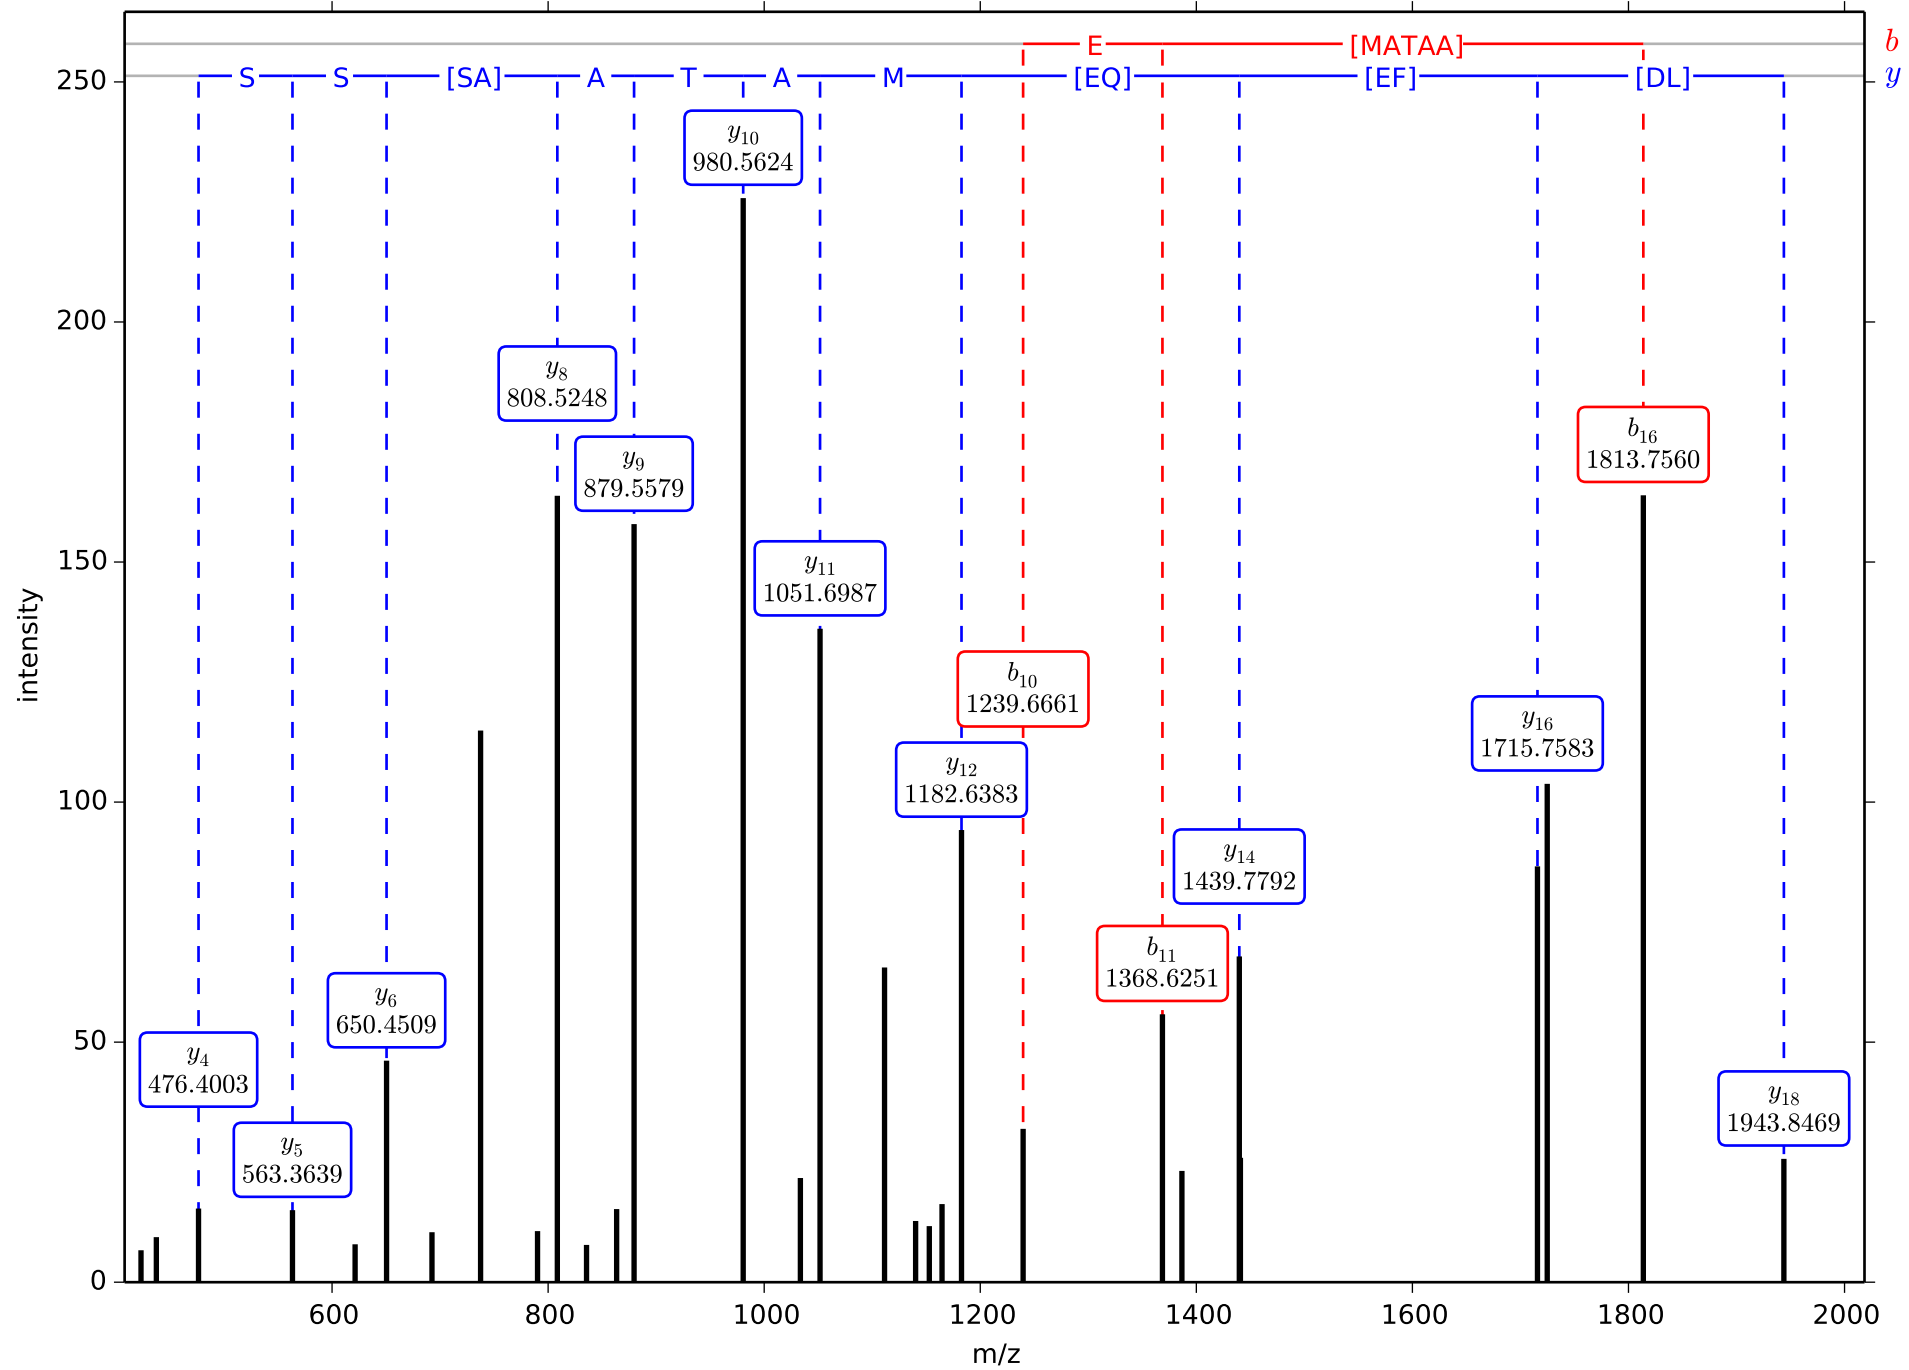

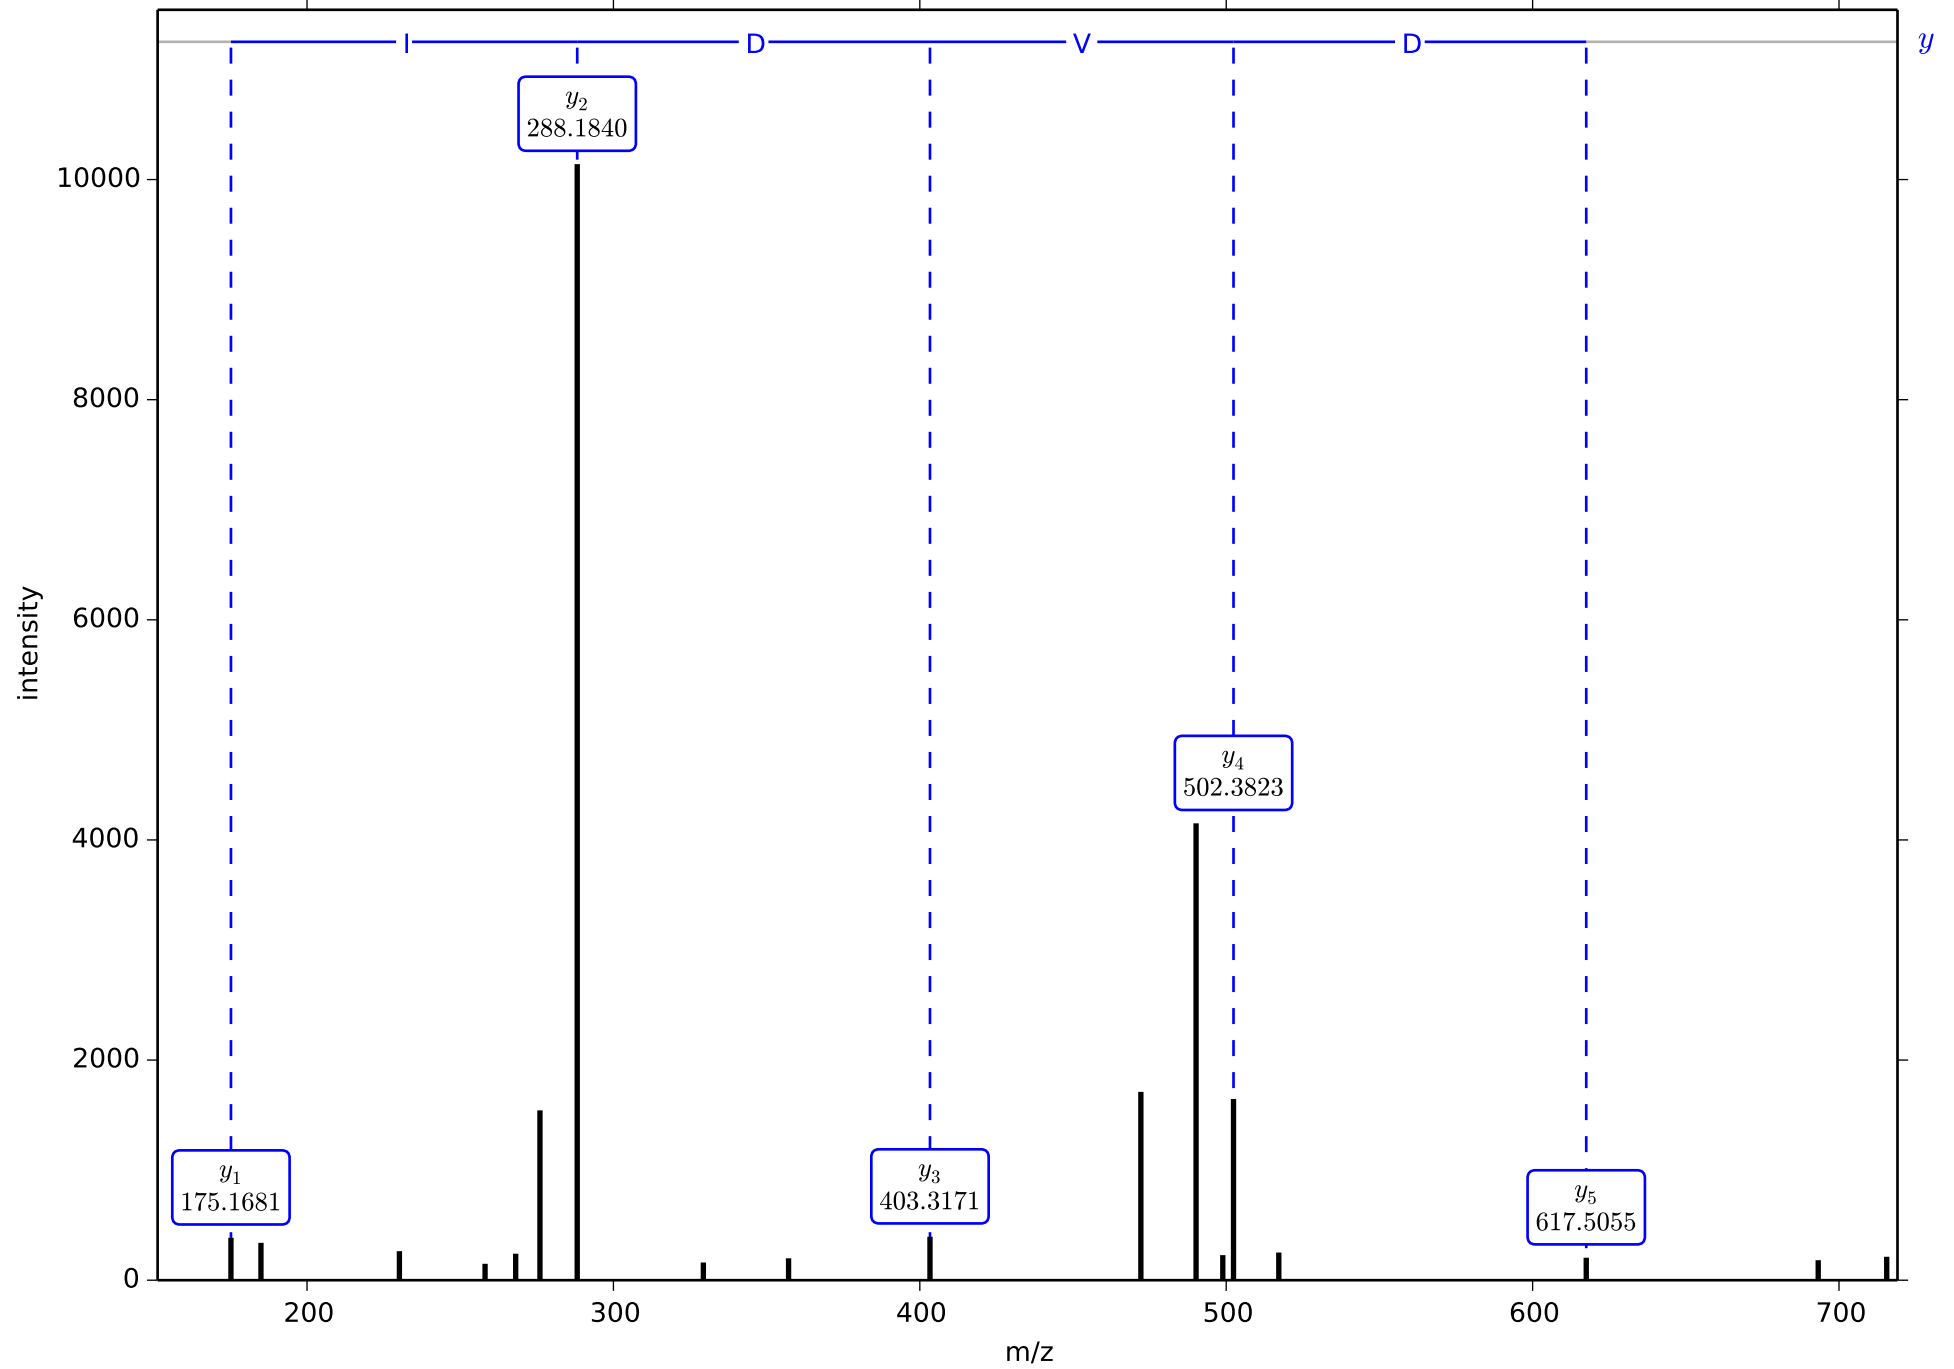

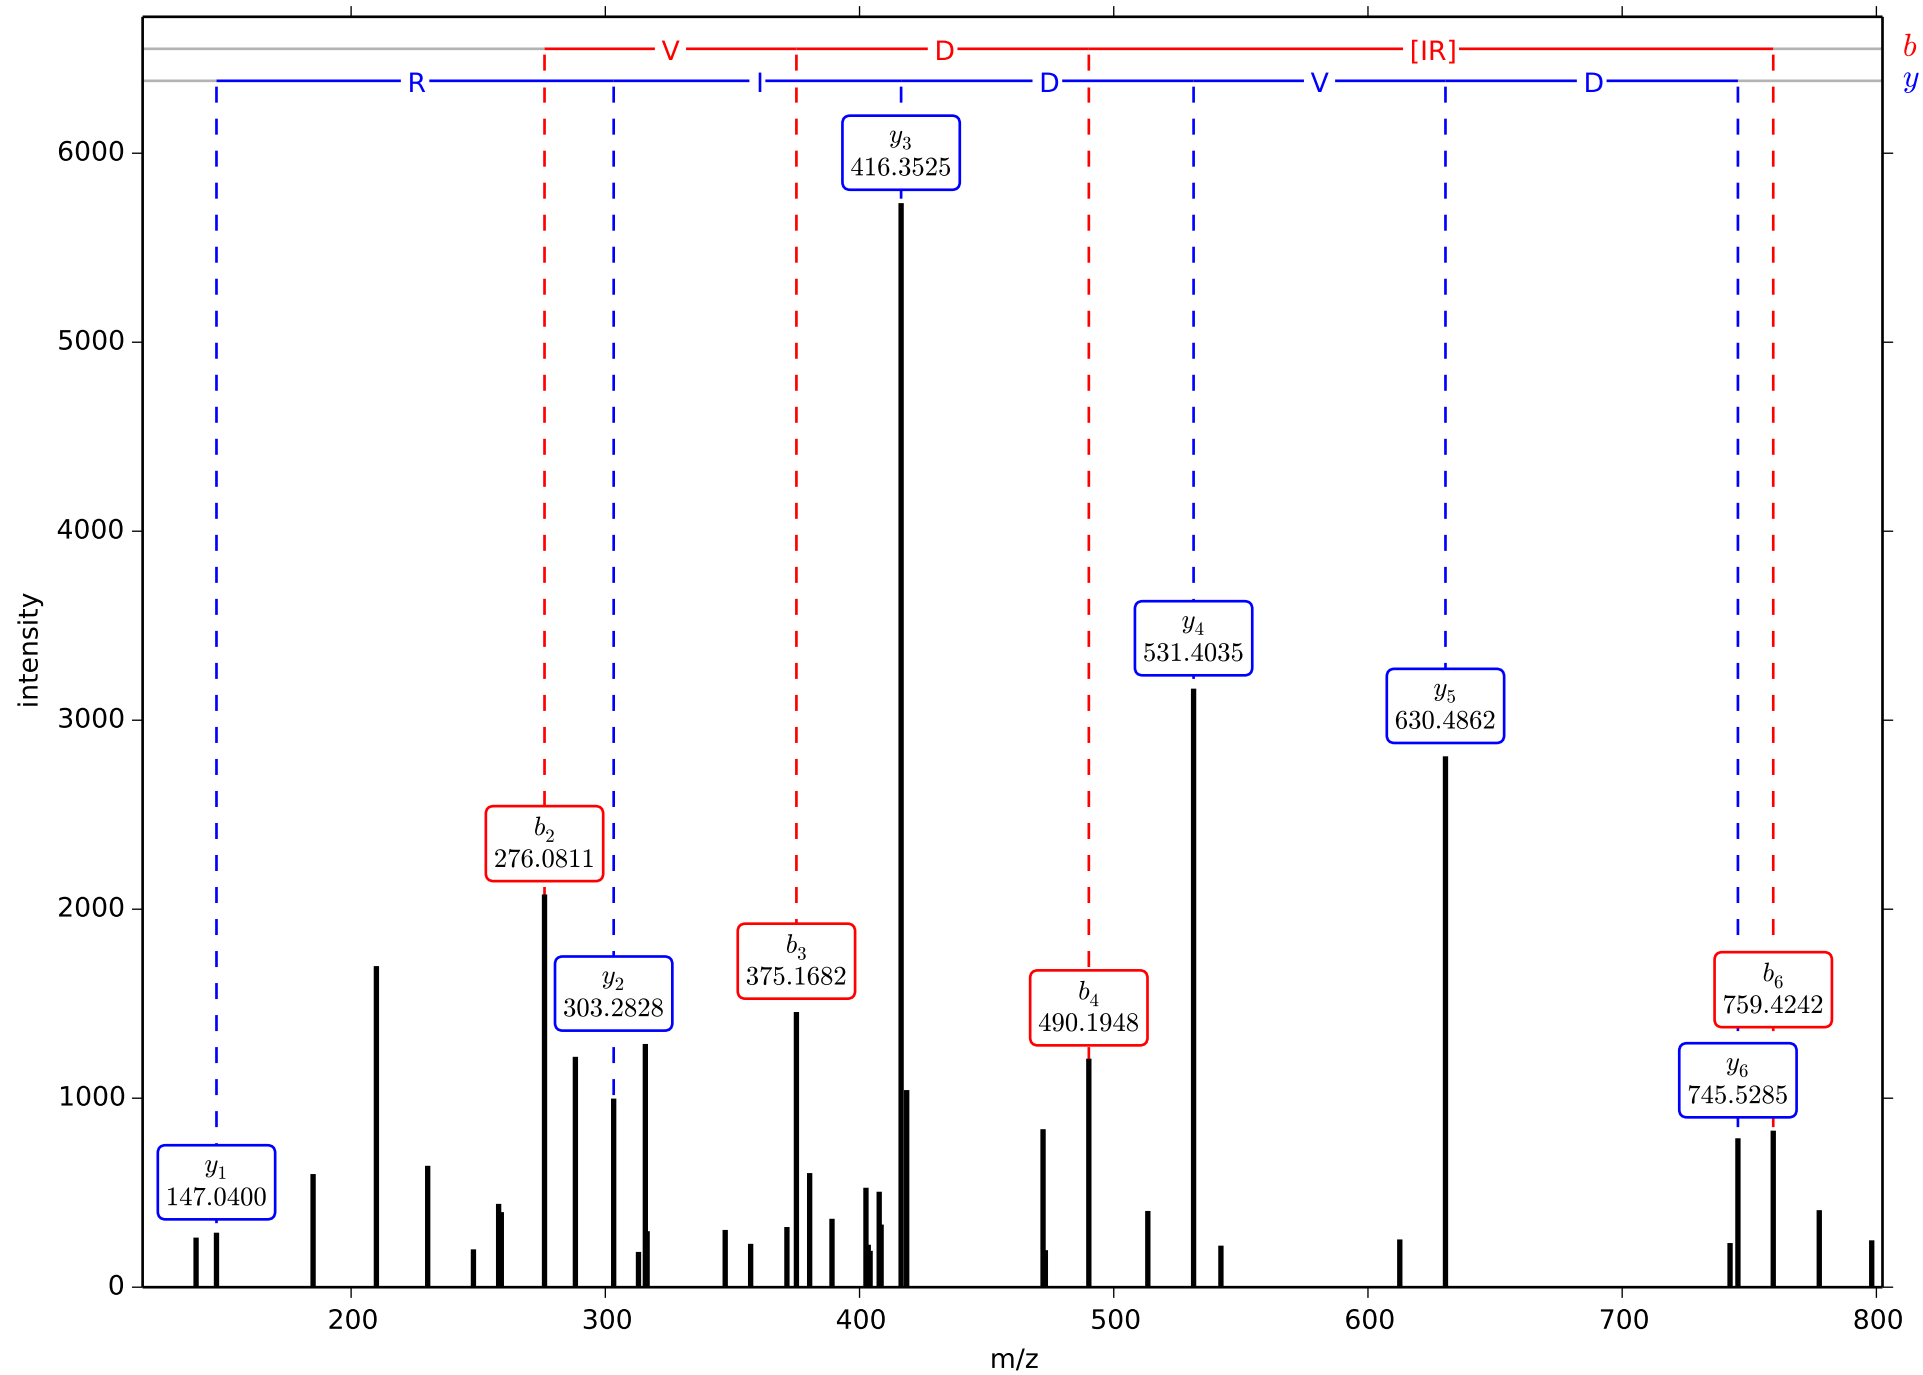

P26443 : CVGVGESDGSIWNPDGIDPK

parent: 1051.492300,2+

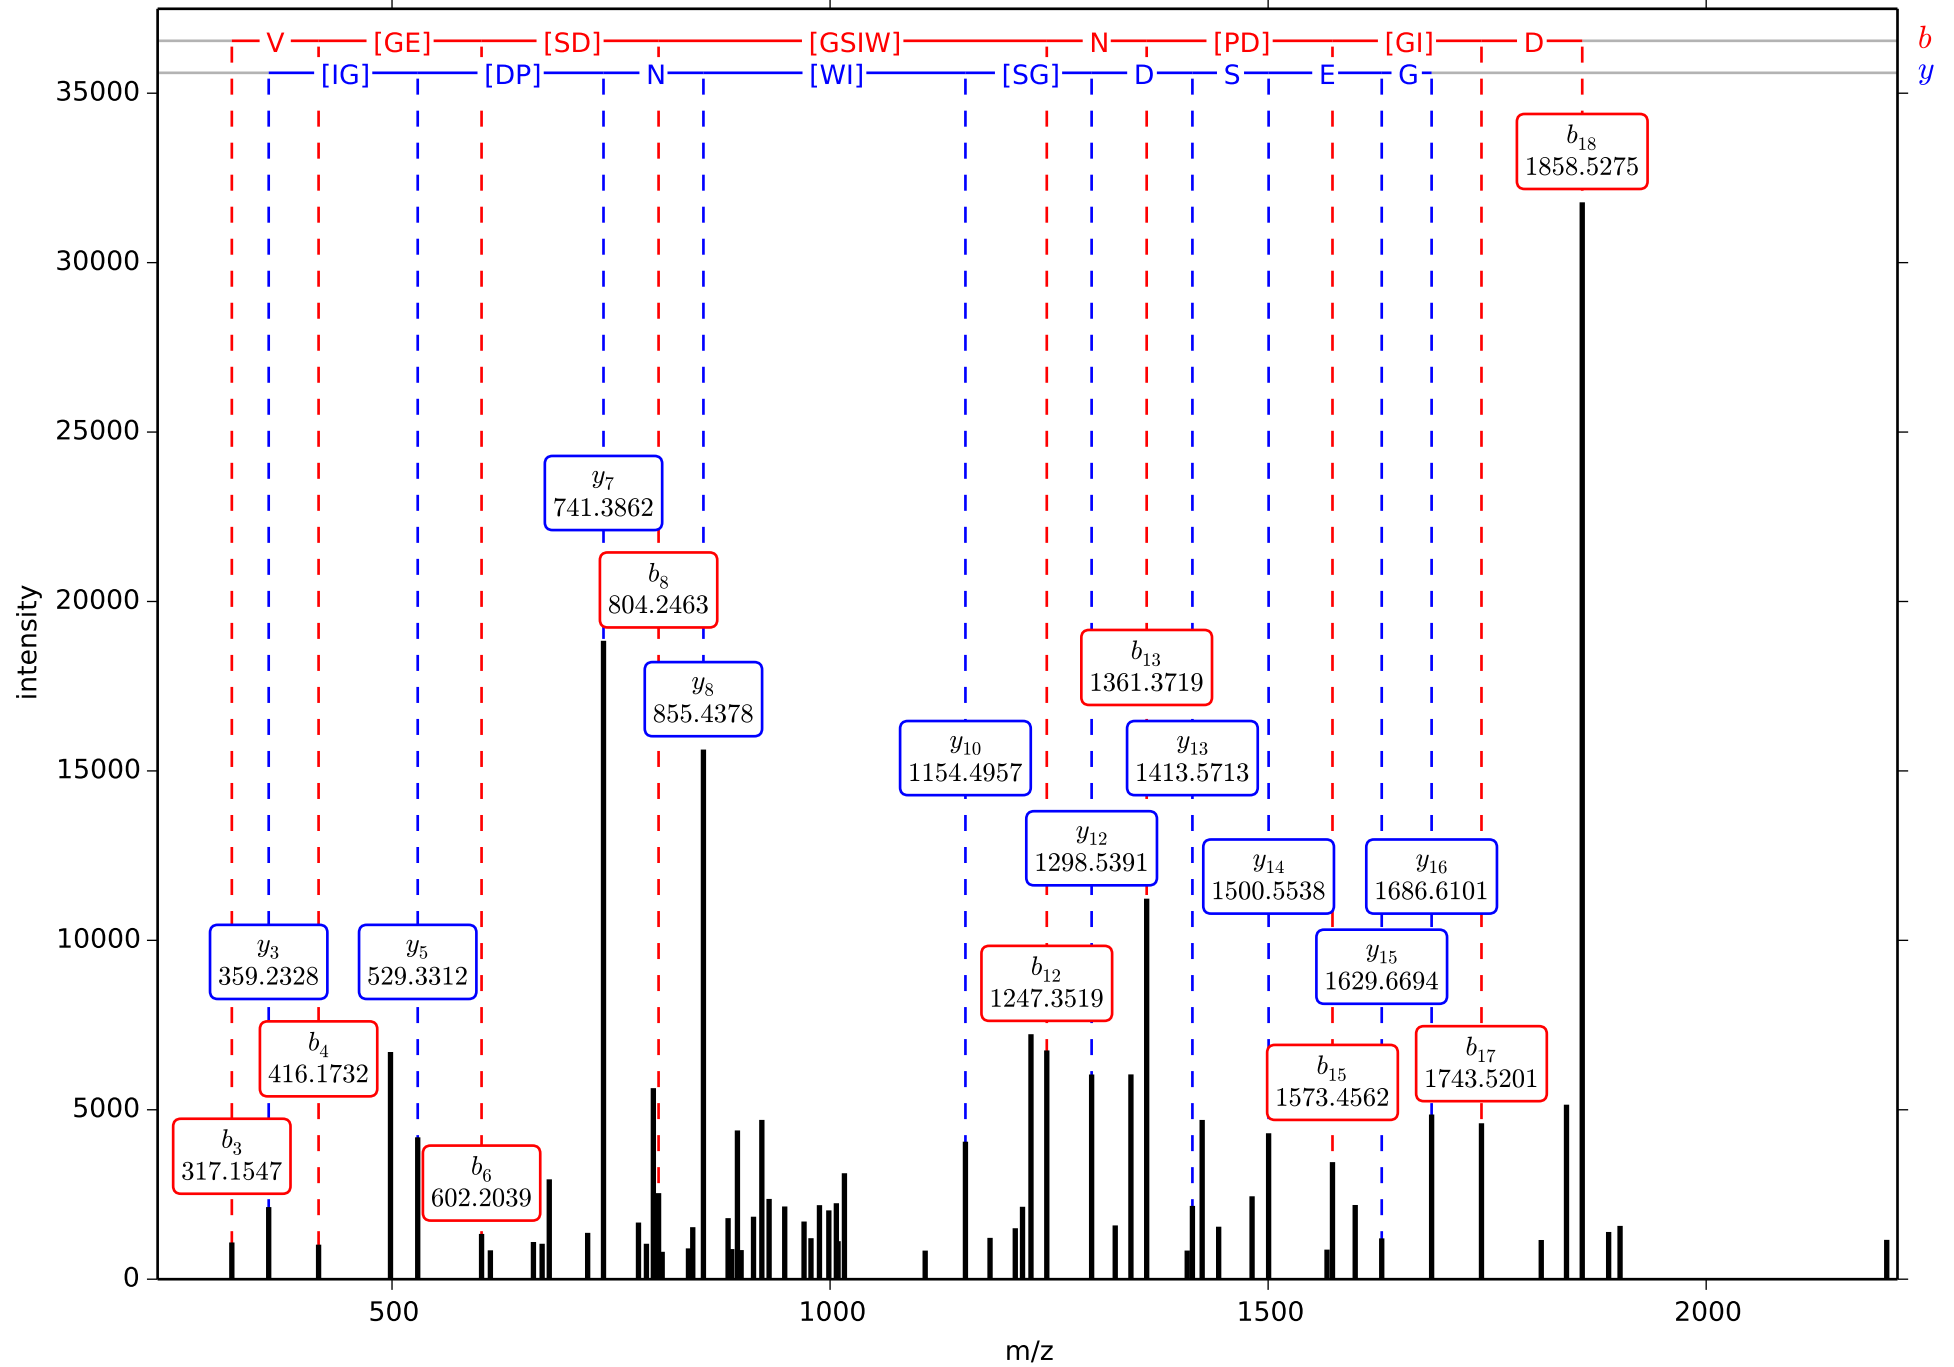



P26443 : CAVVDVPFGGAK

parent: 610.314620,2+

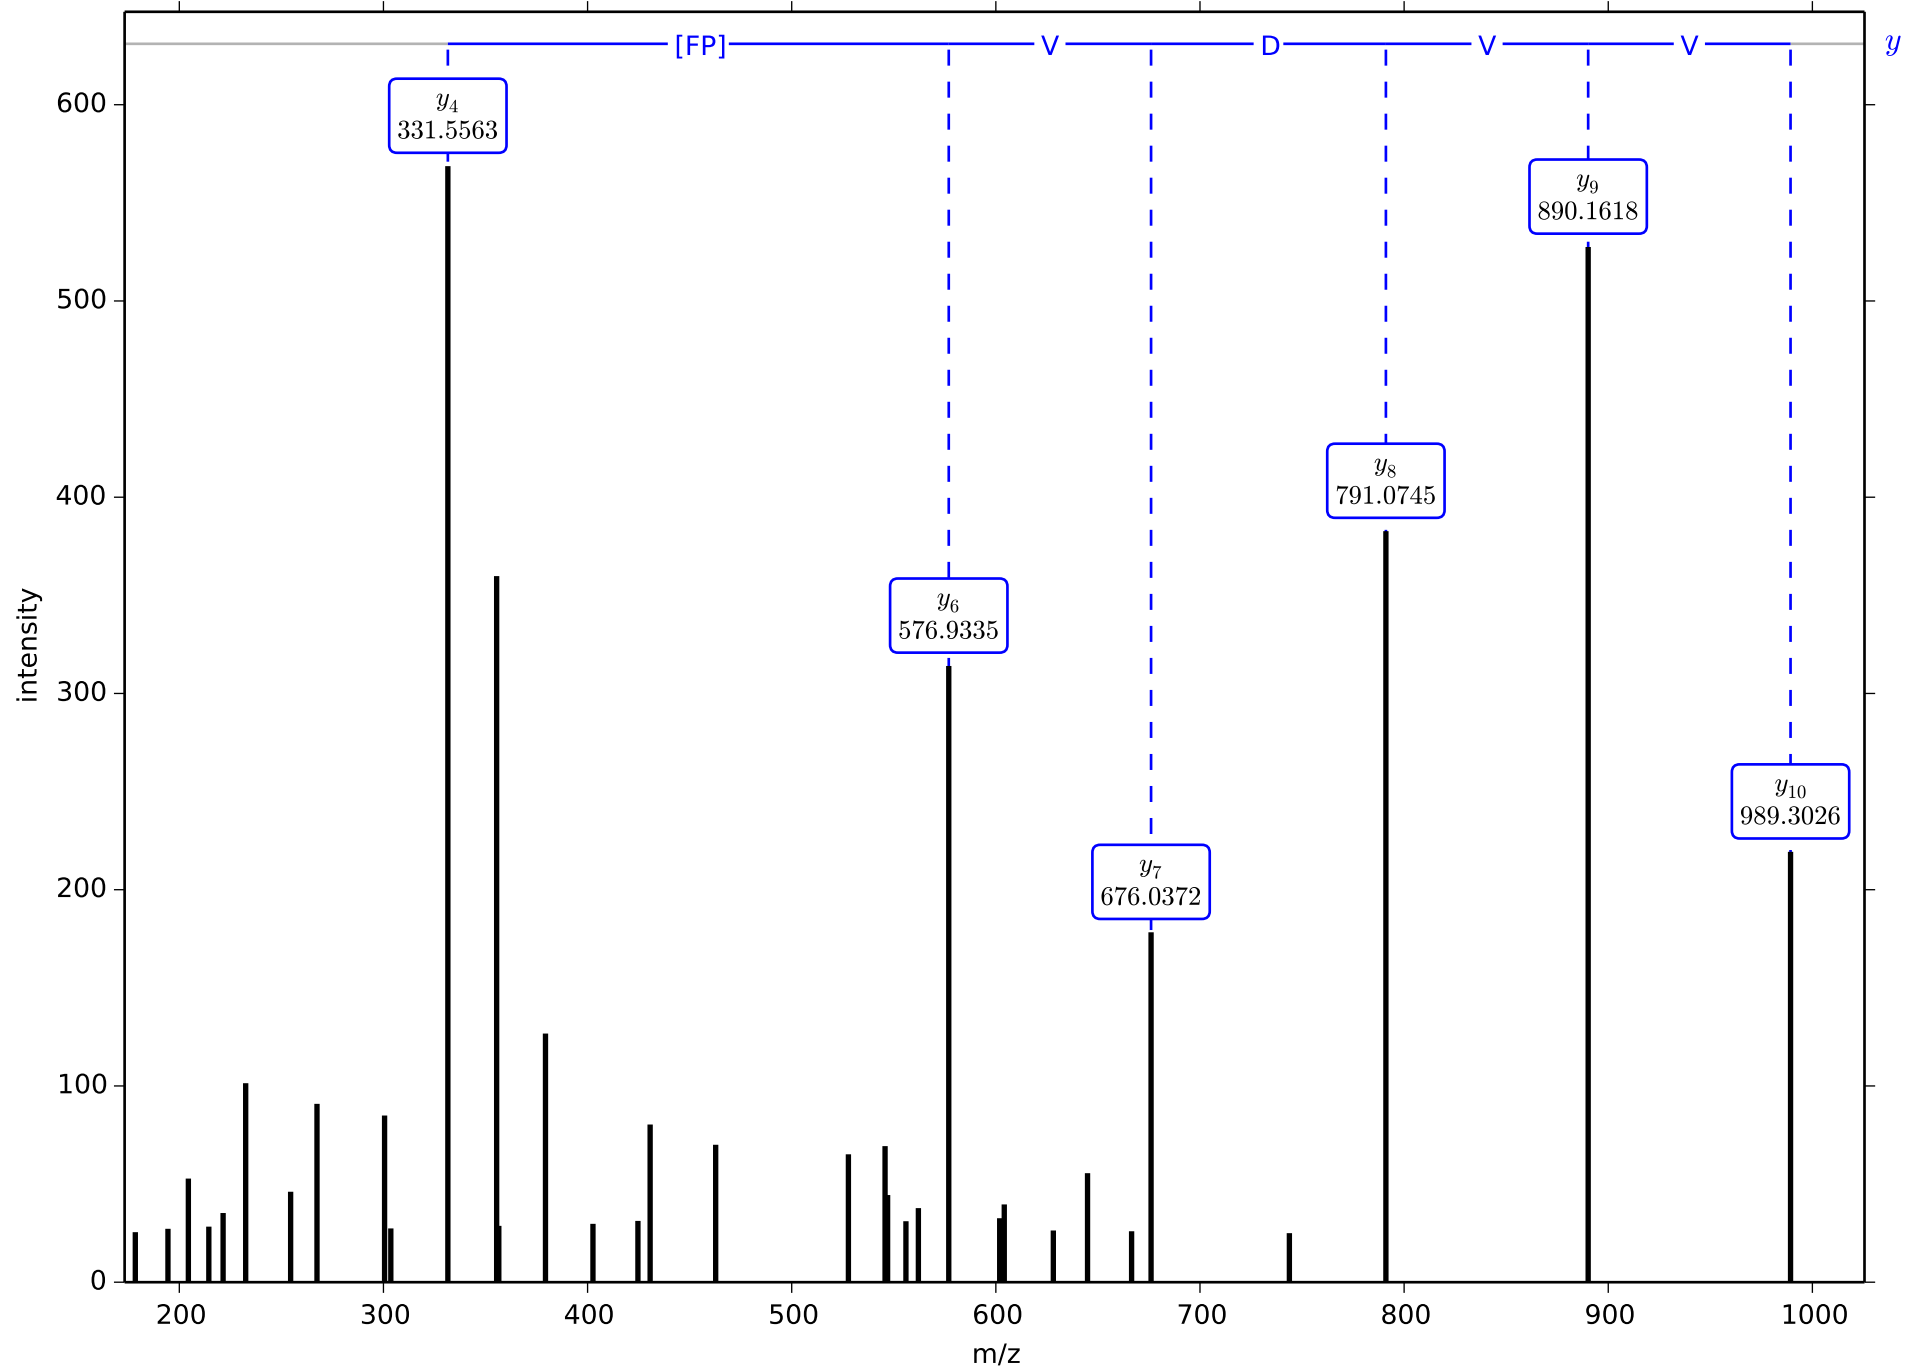

# Q61885 : ALVGDEALPCR

parent: 665.326170,2+

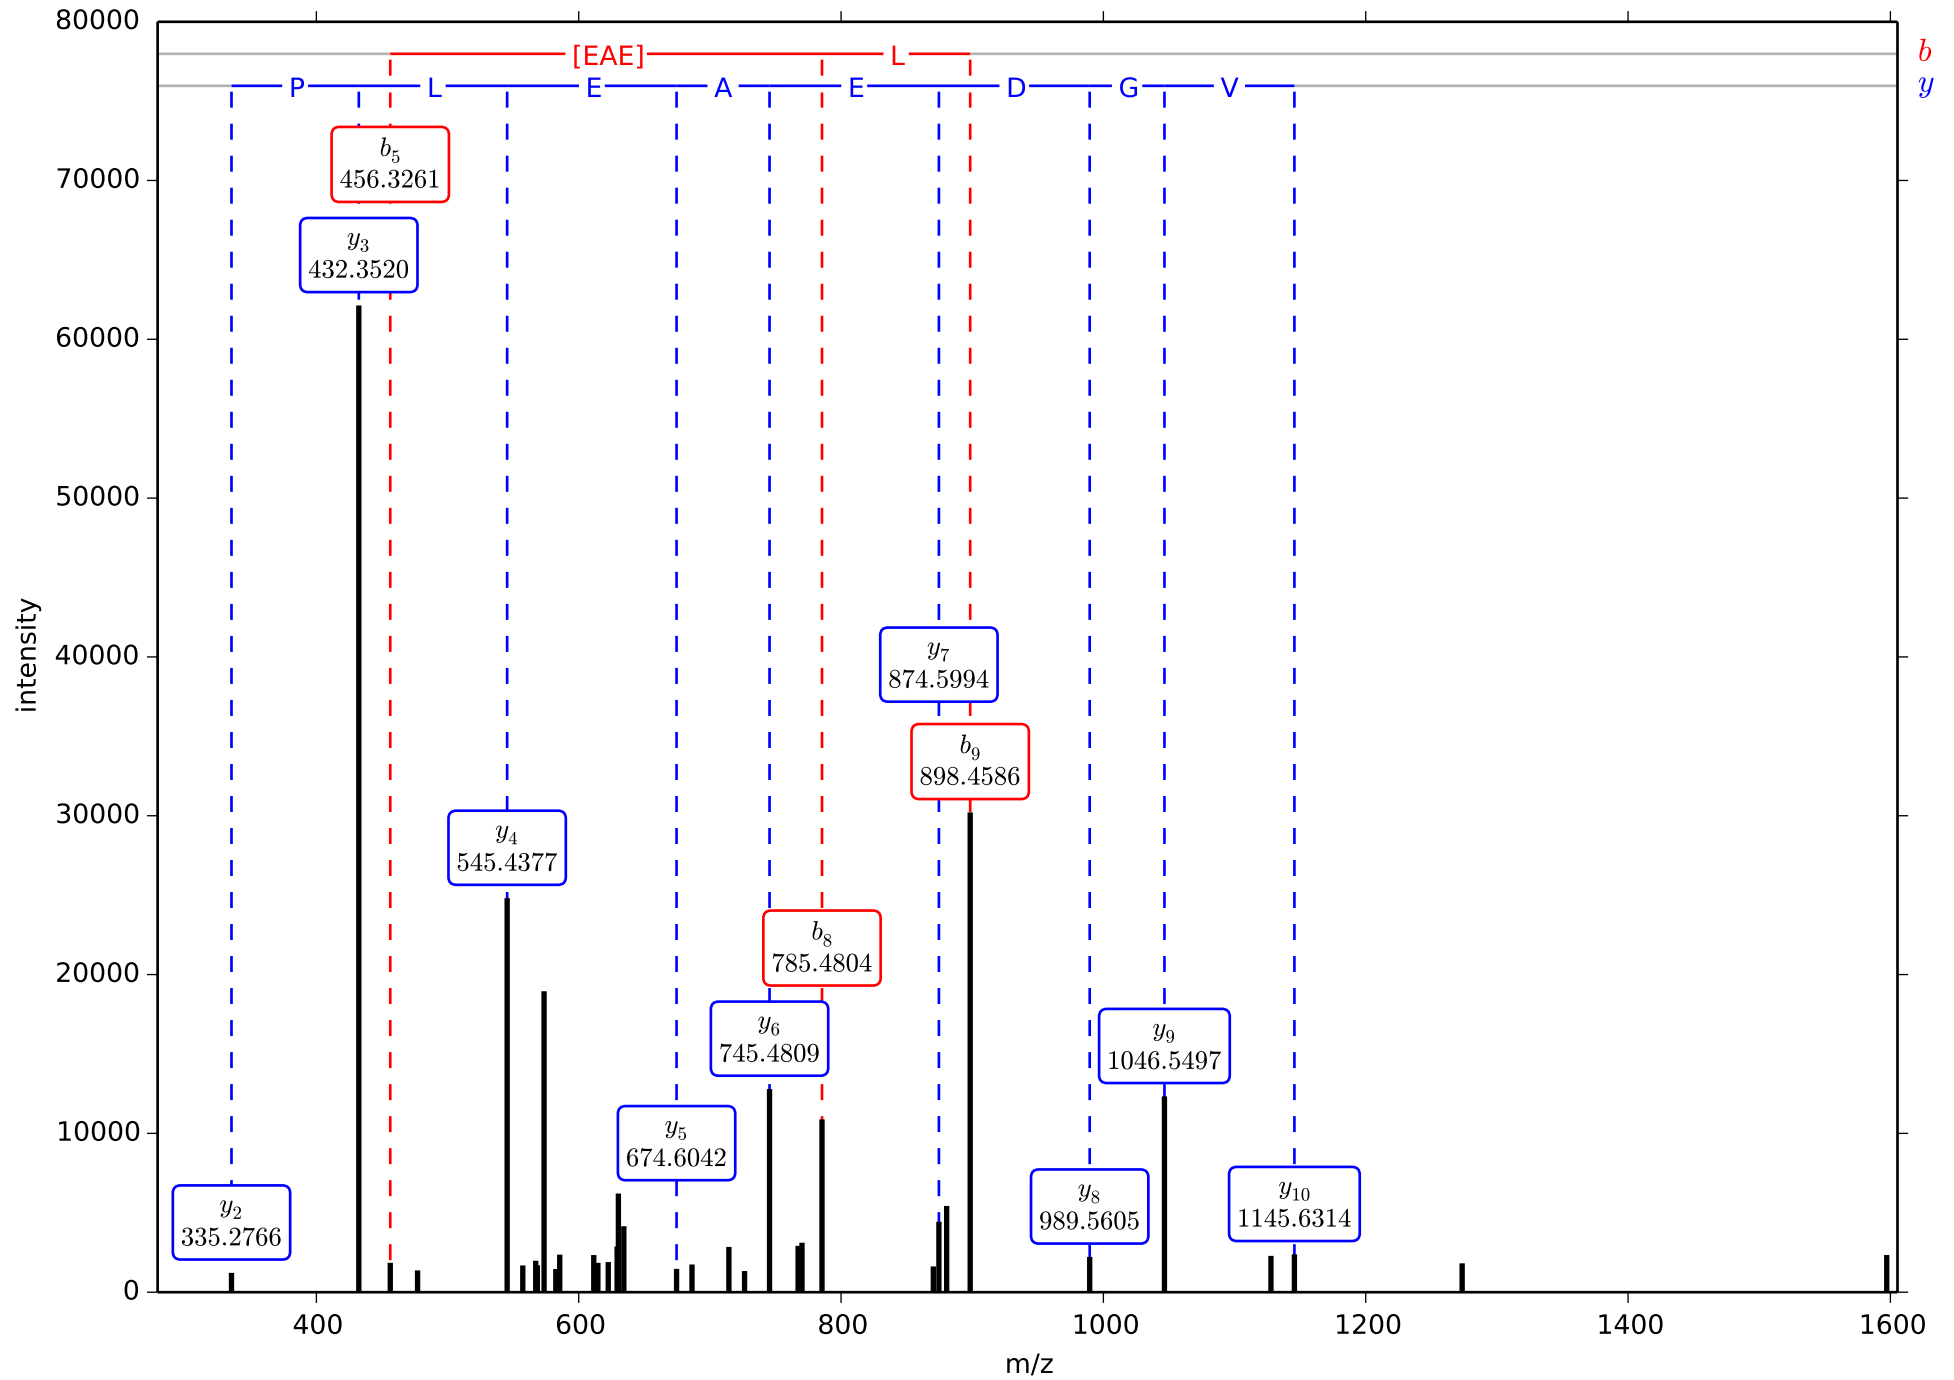

Q61885 : FSDEGGYTCCFR

parent: 743.299240,2+

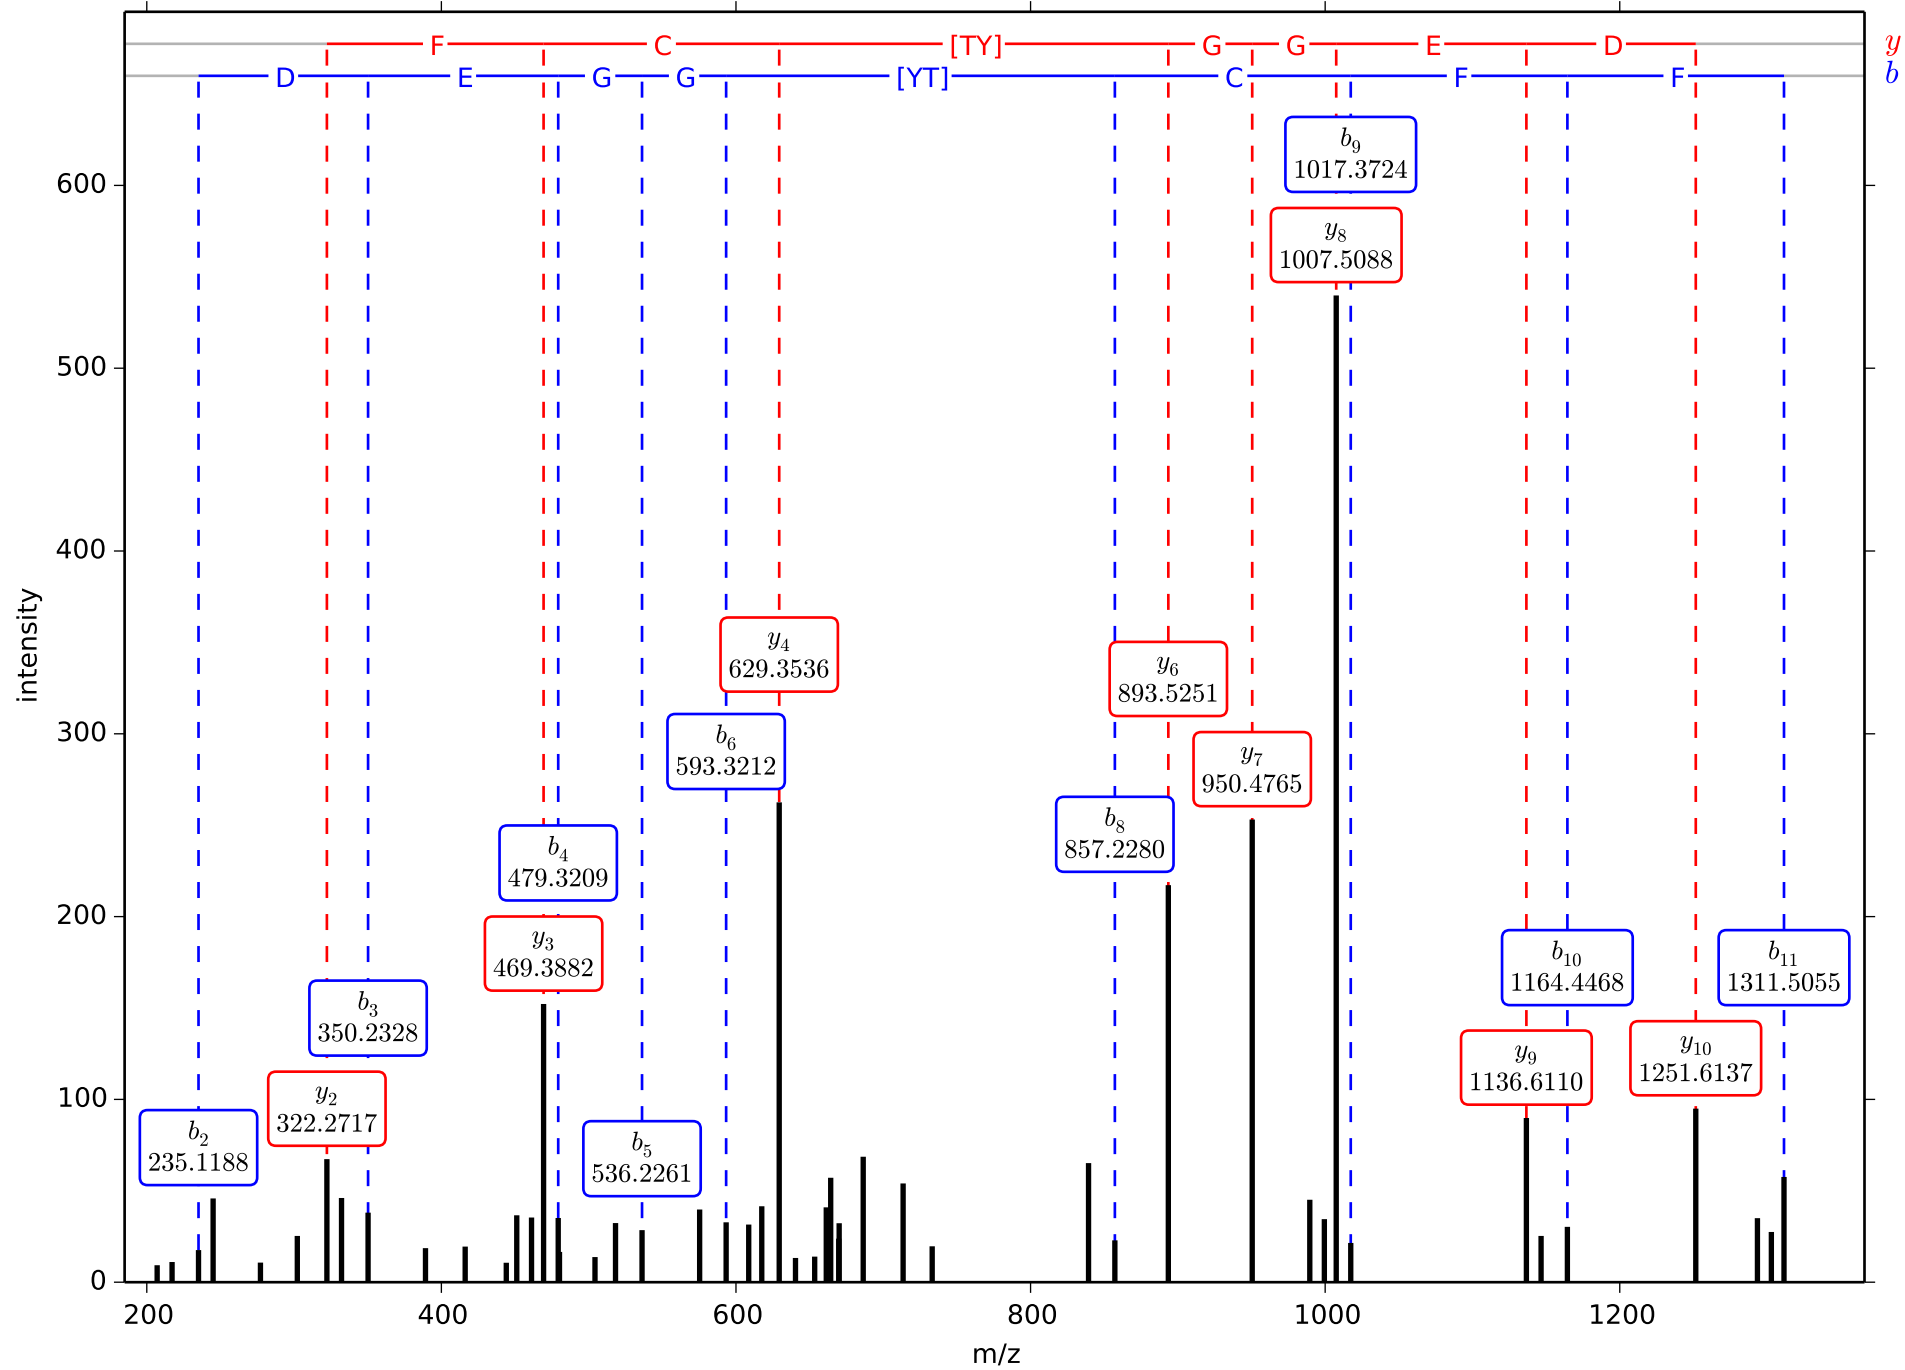

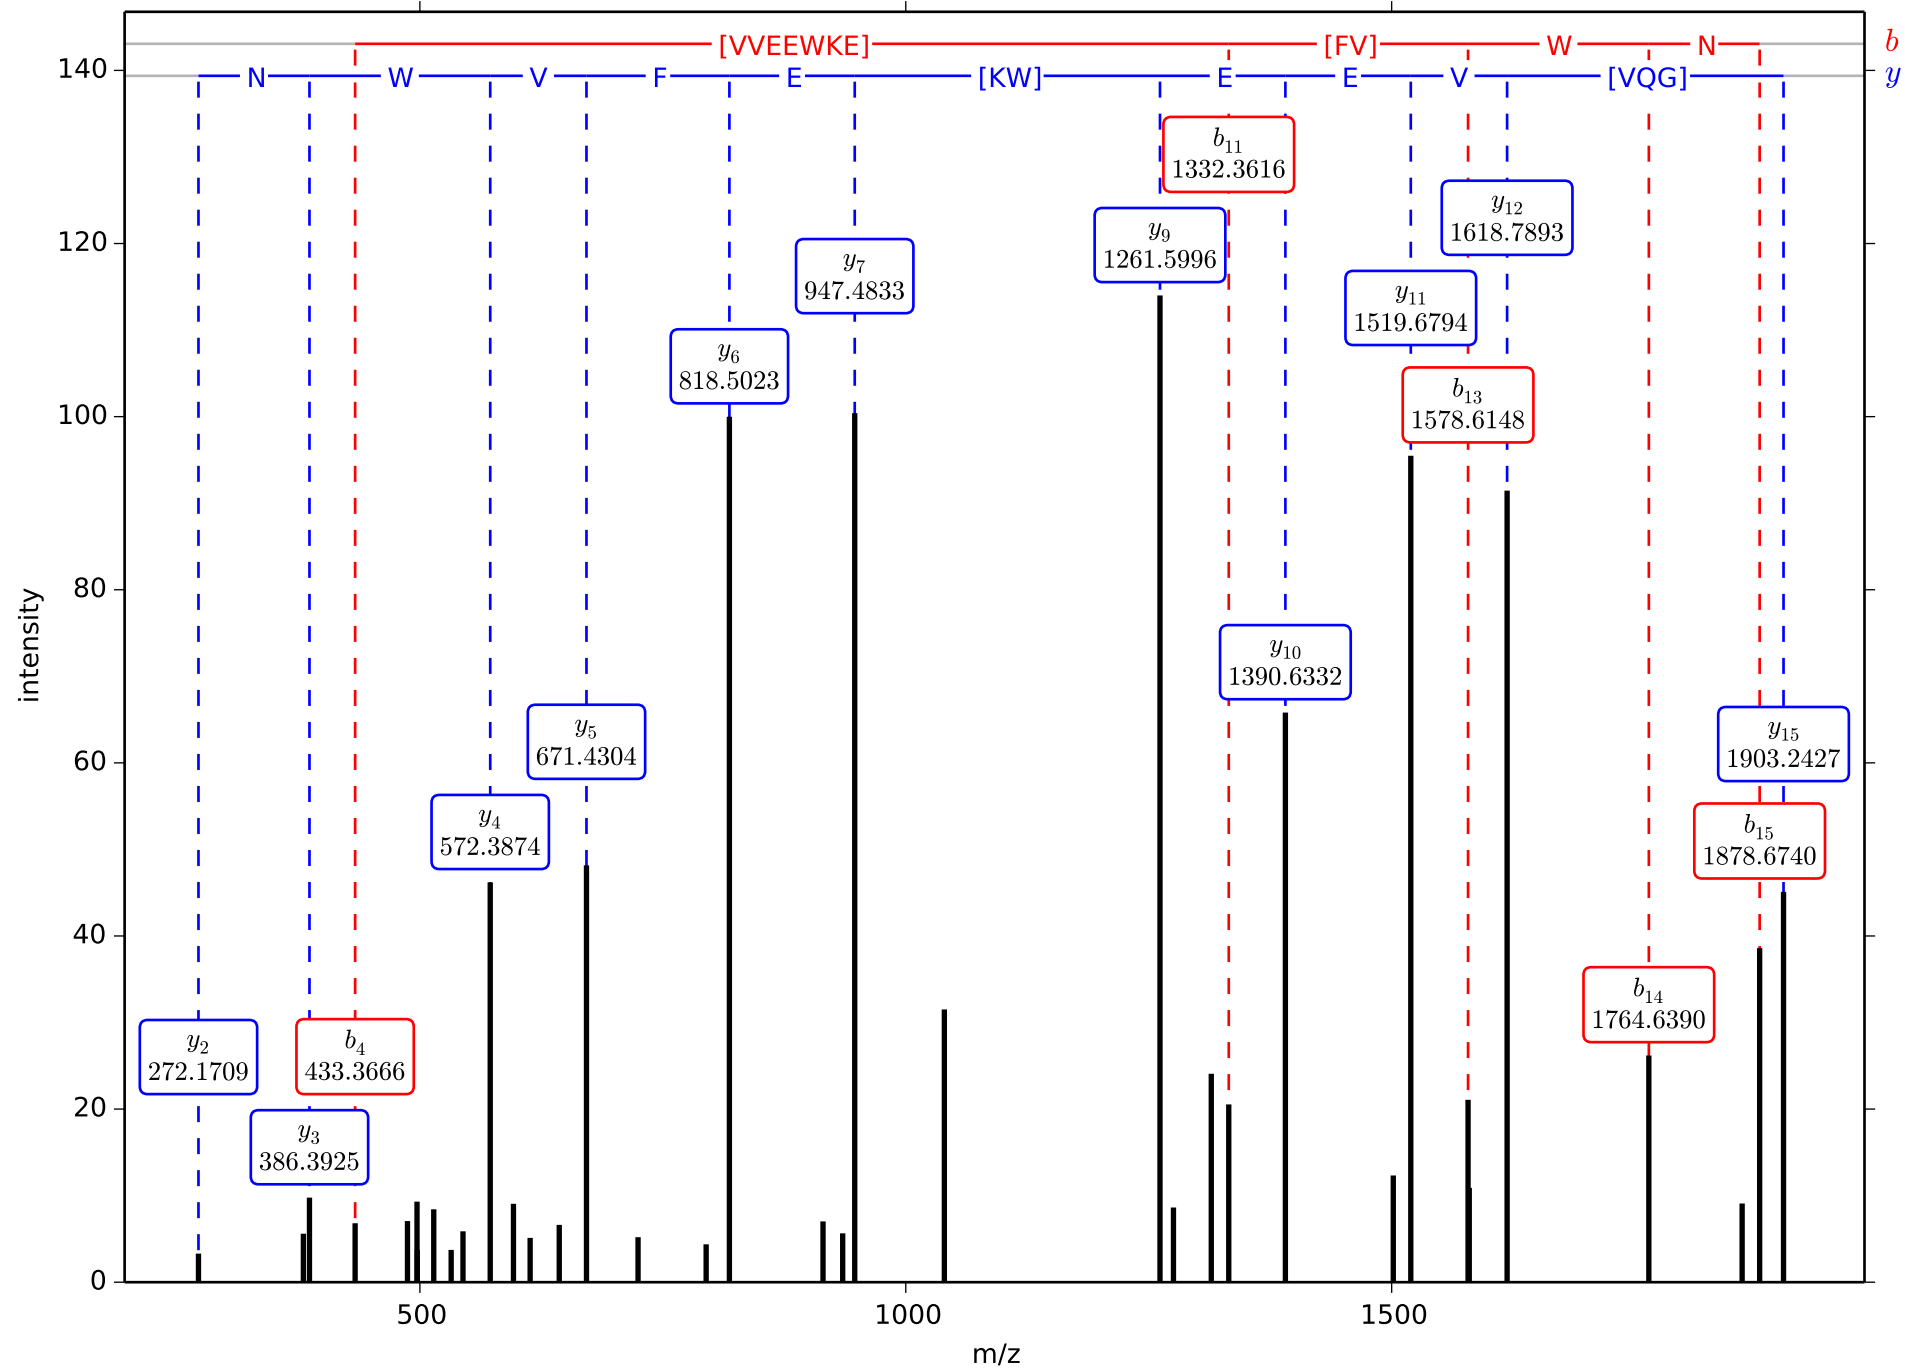

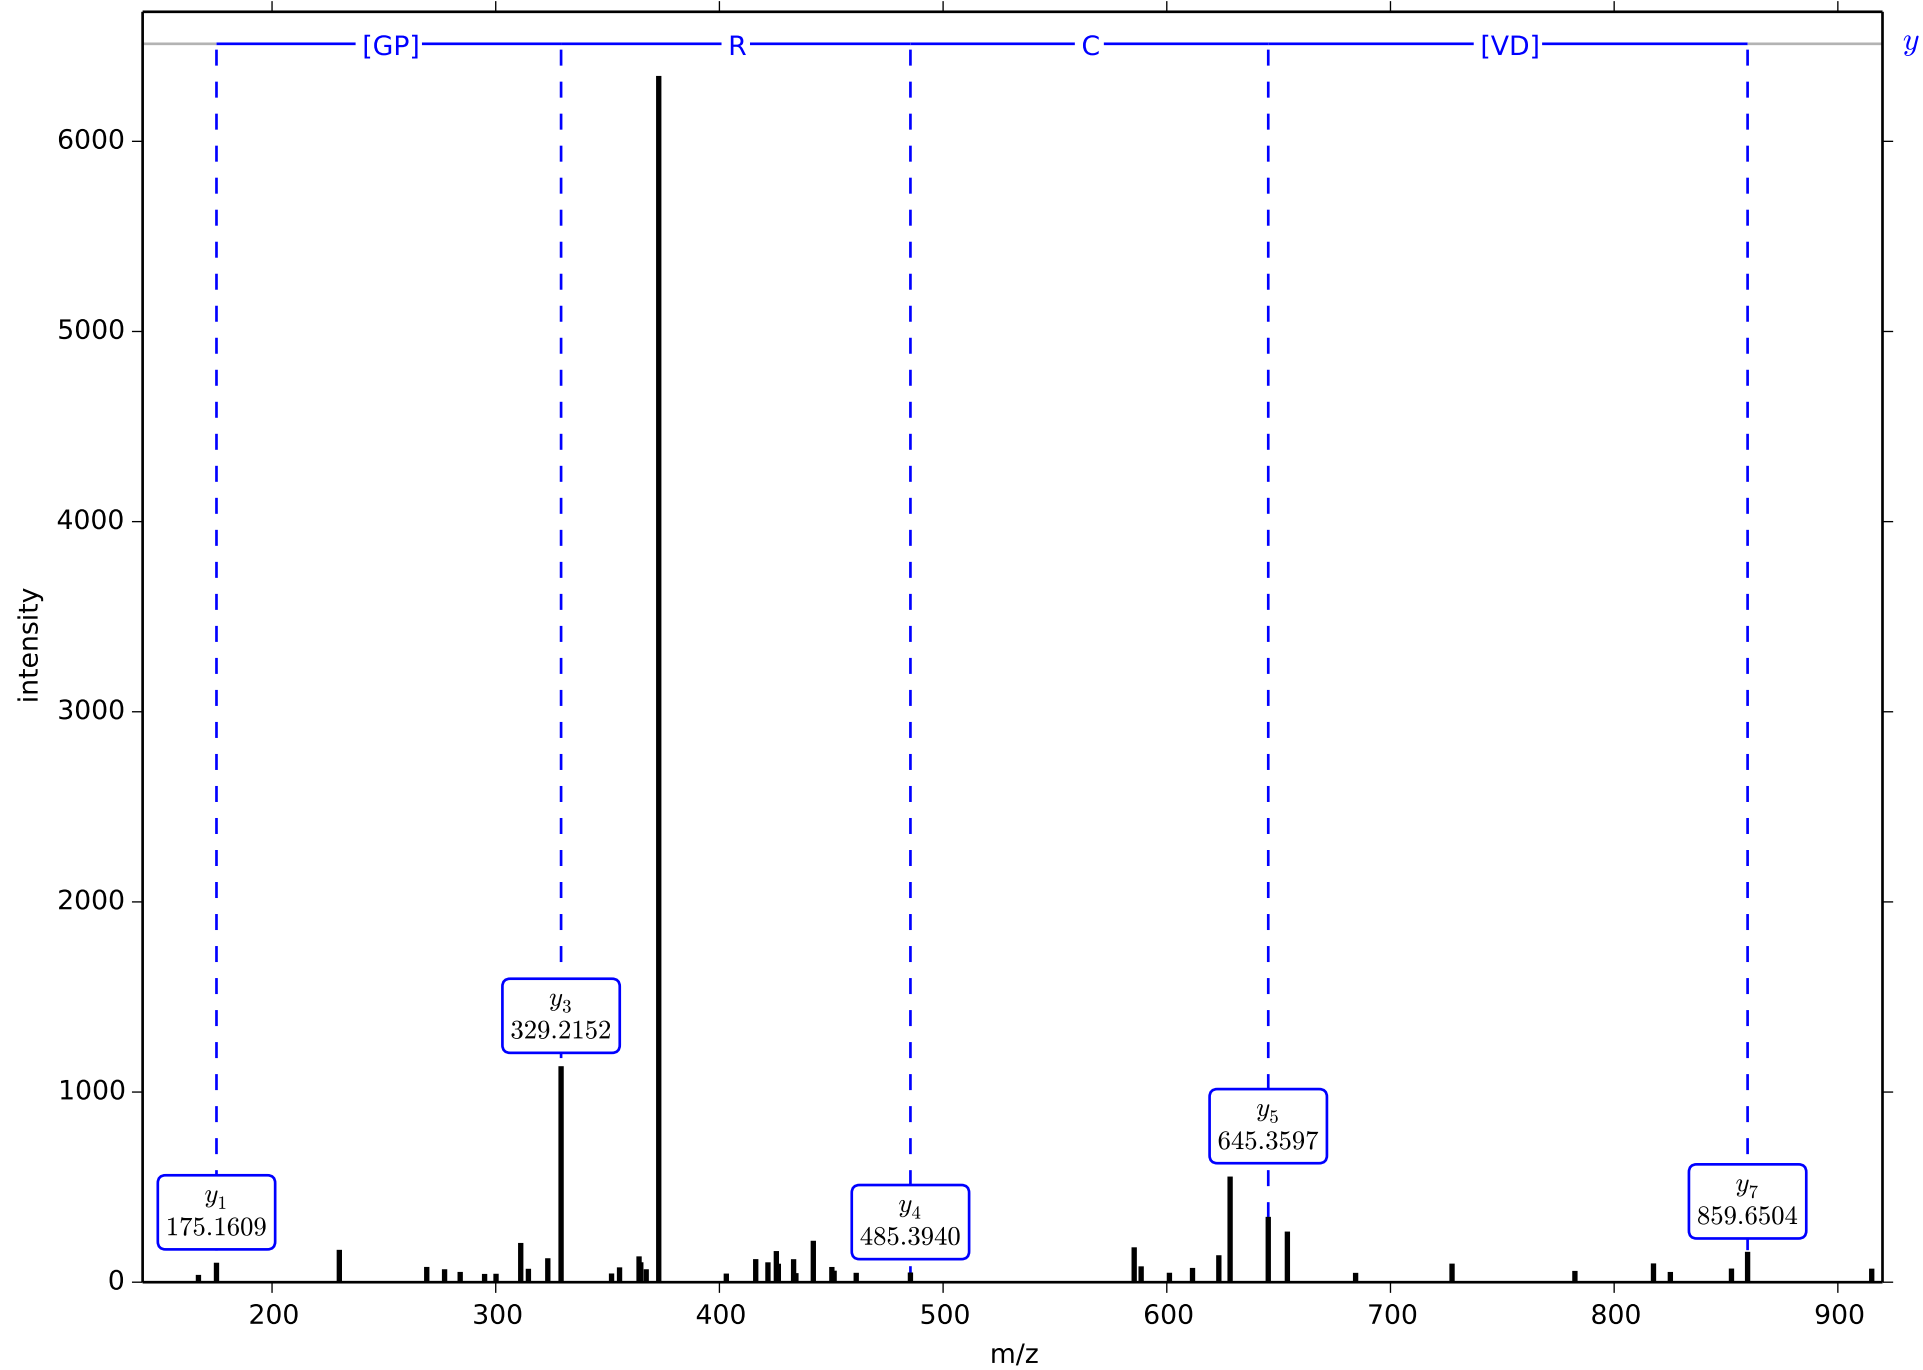

Q8BLK3 : IQKVDVYDEGSYTCSVQTQHEPK

parent: 904.425490,3+

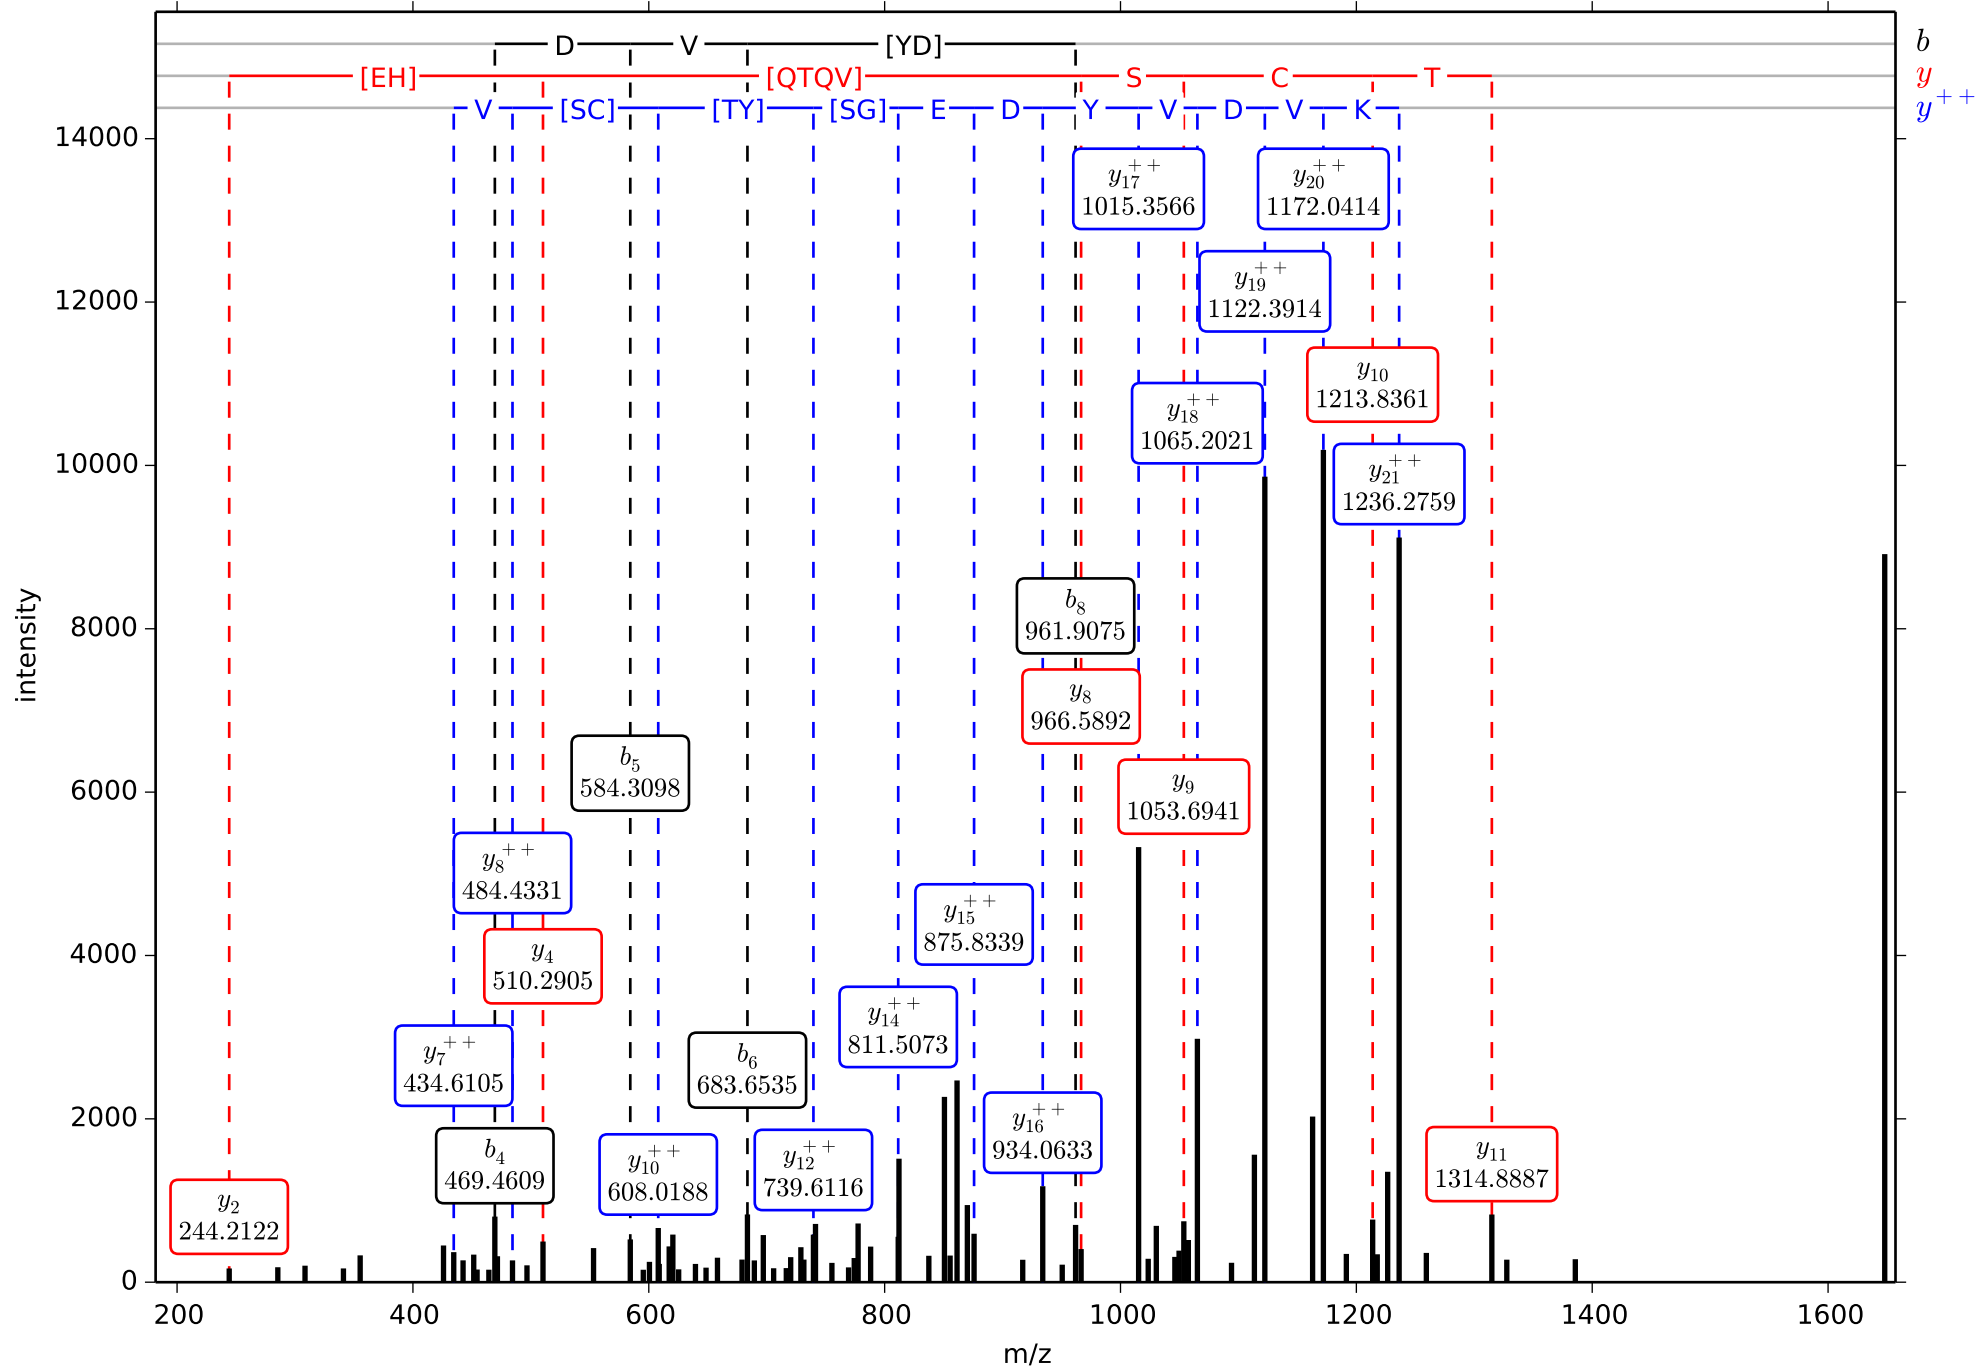

# Q8BLK3 : VDHYDEGSYTCSVQTQHEPK

parent: 1171.532300,2+

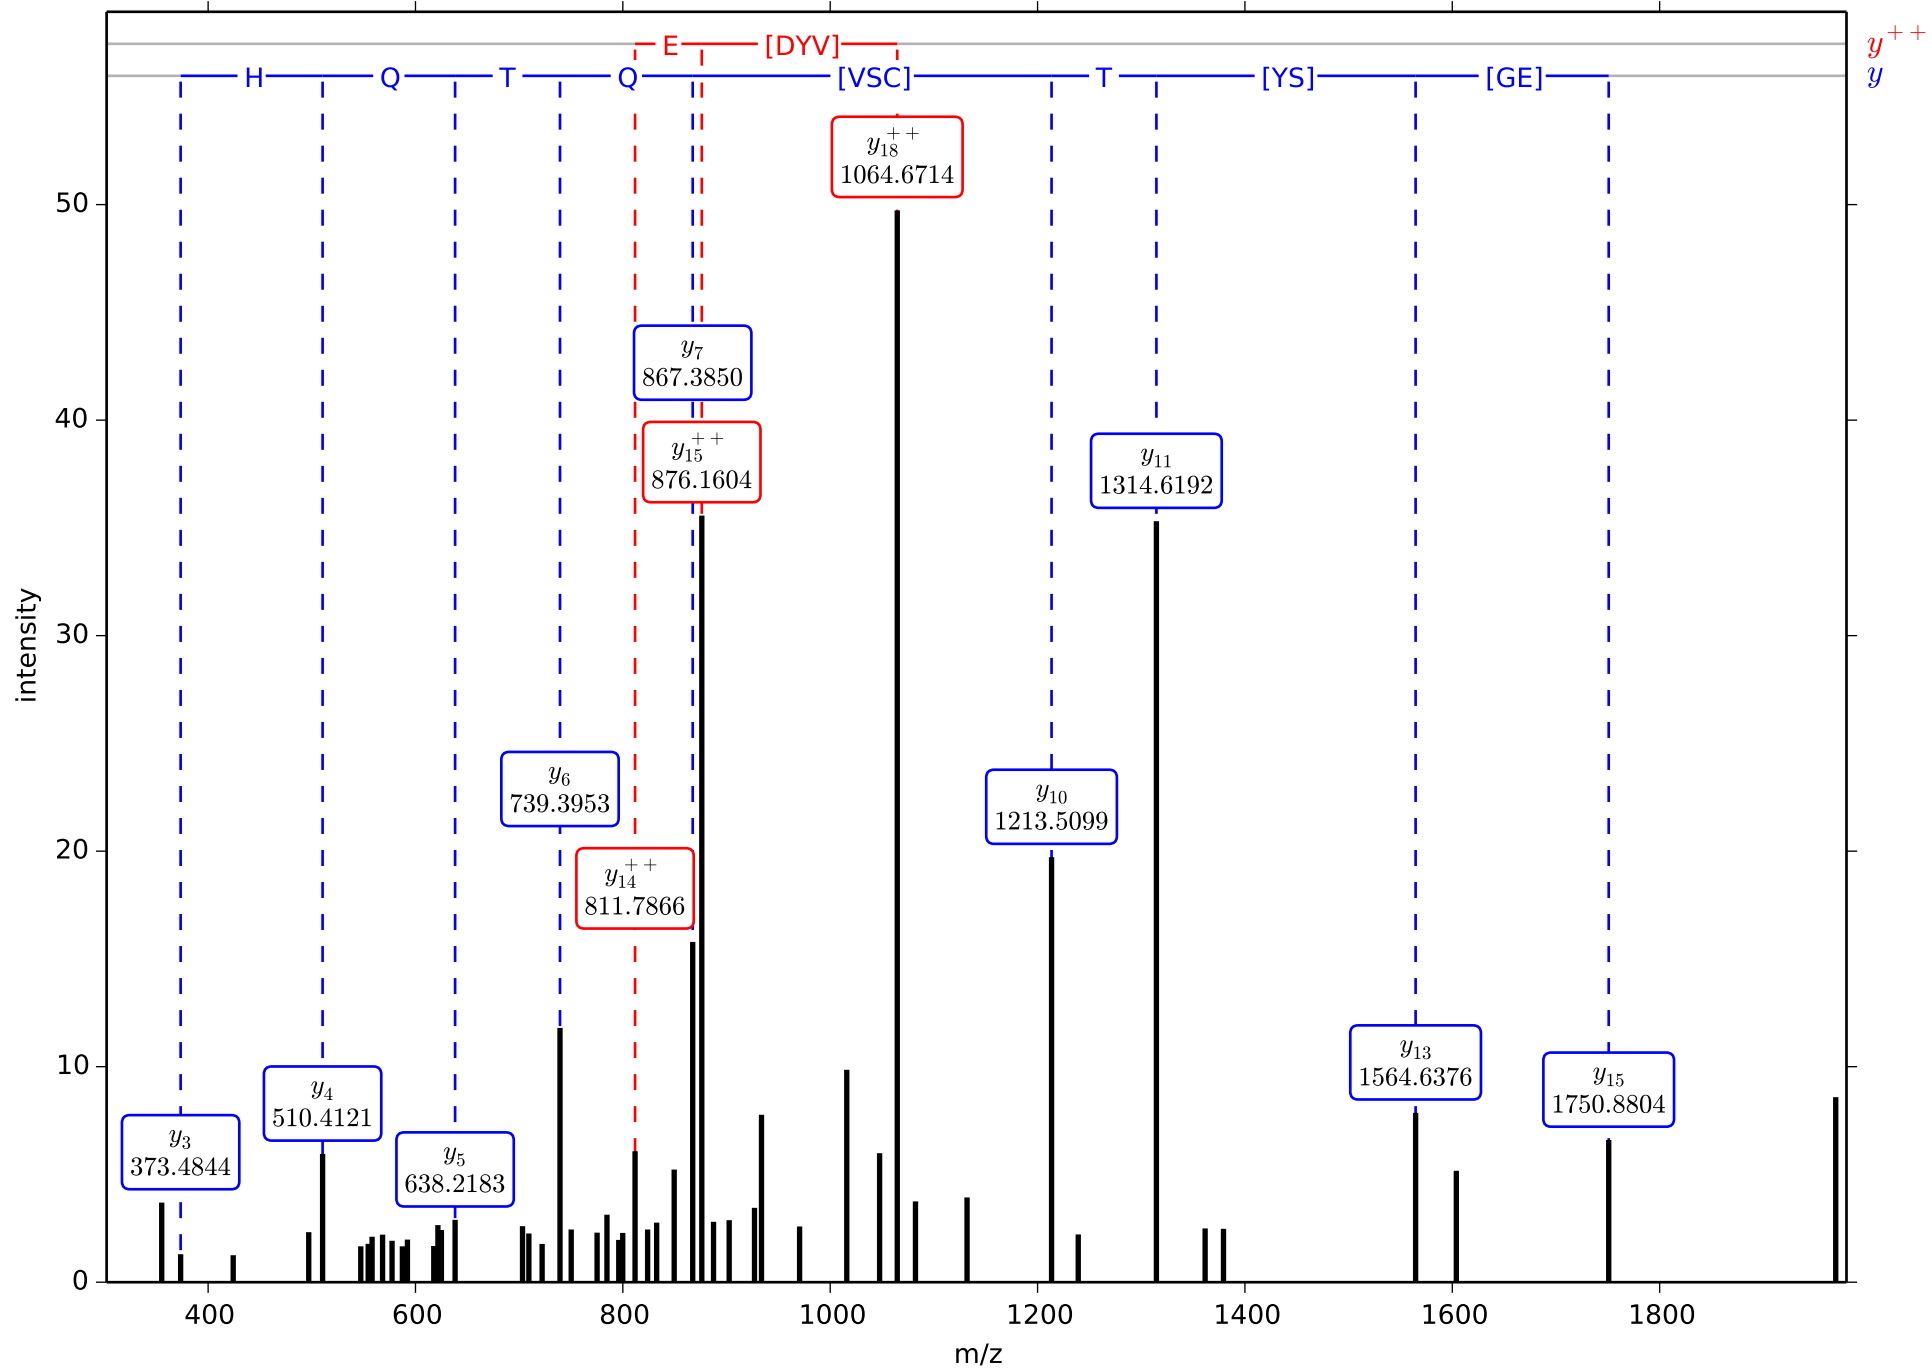

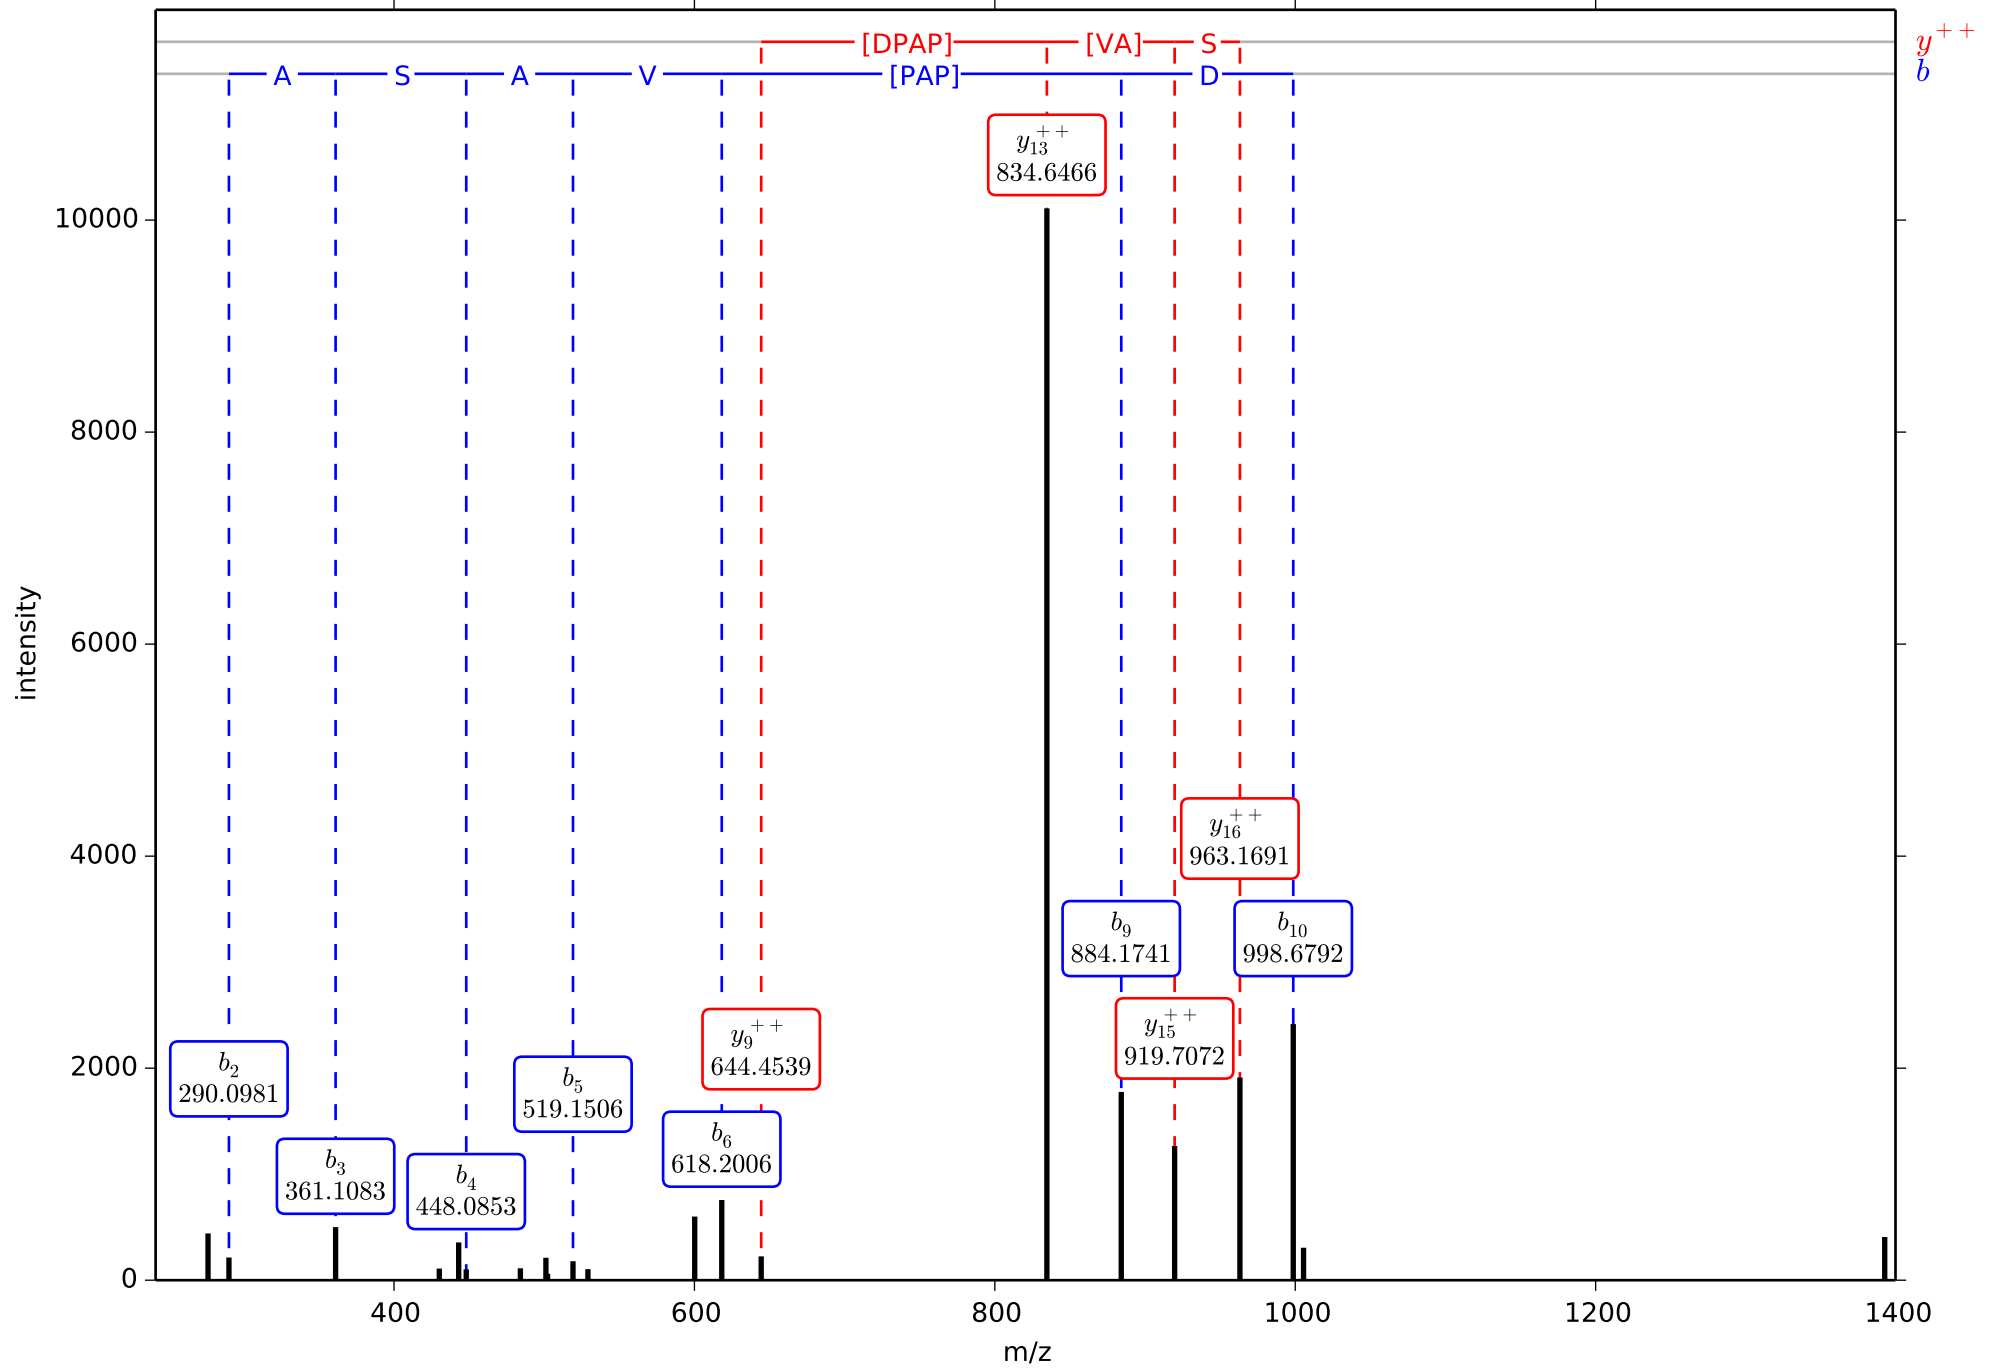



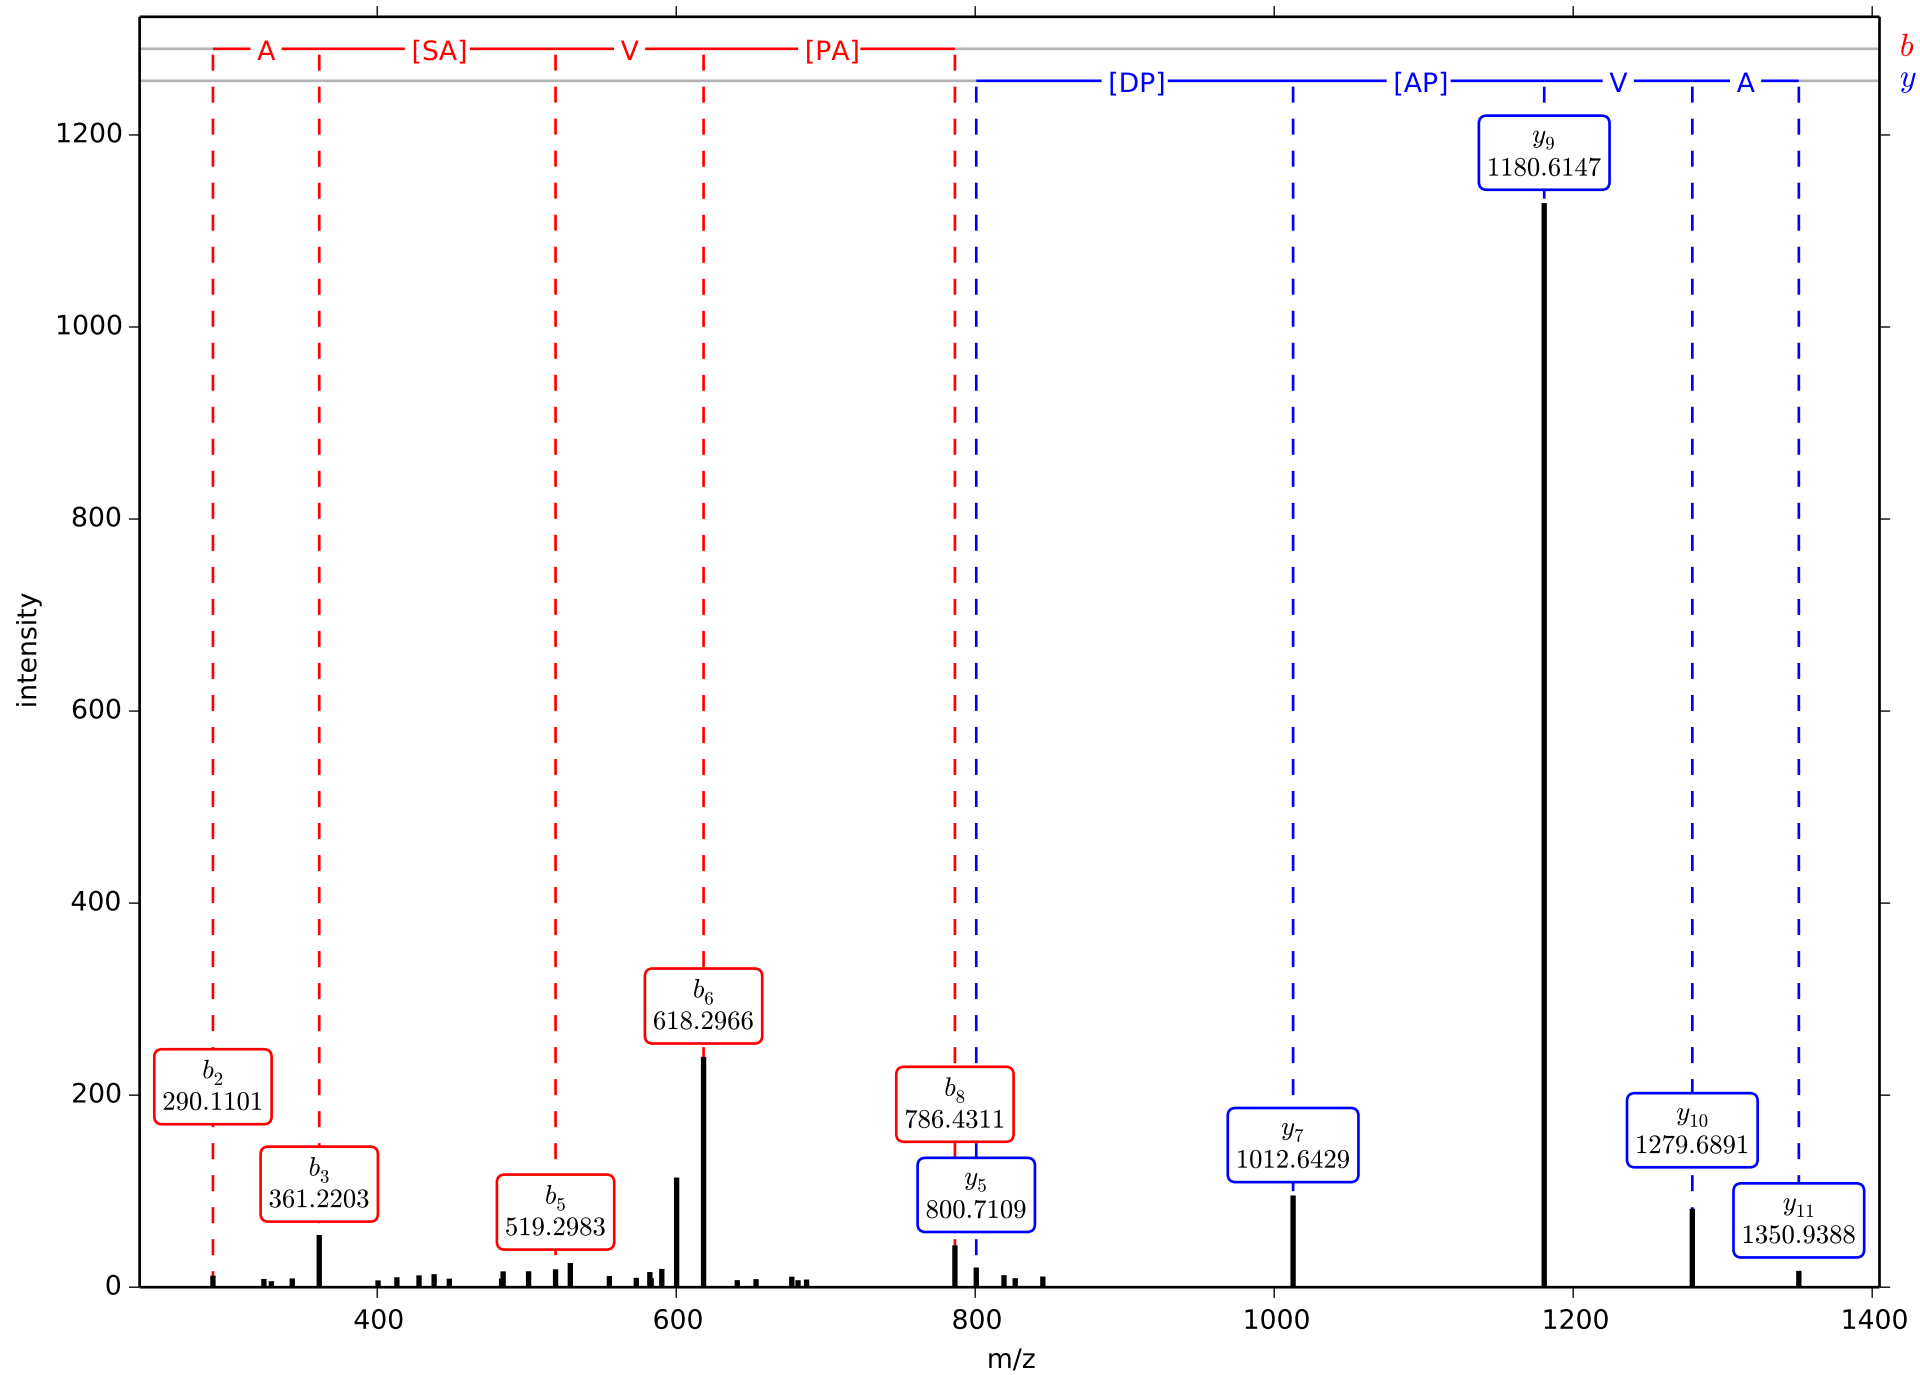

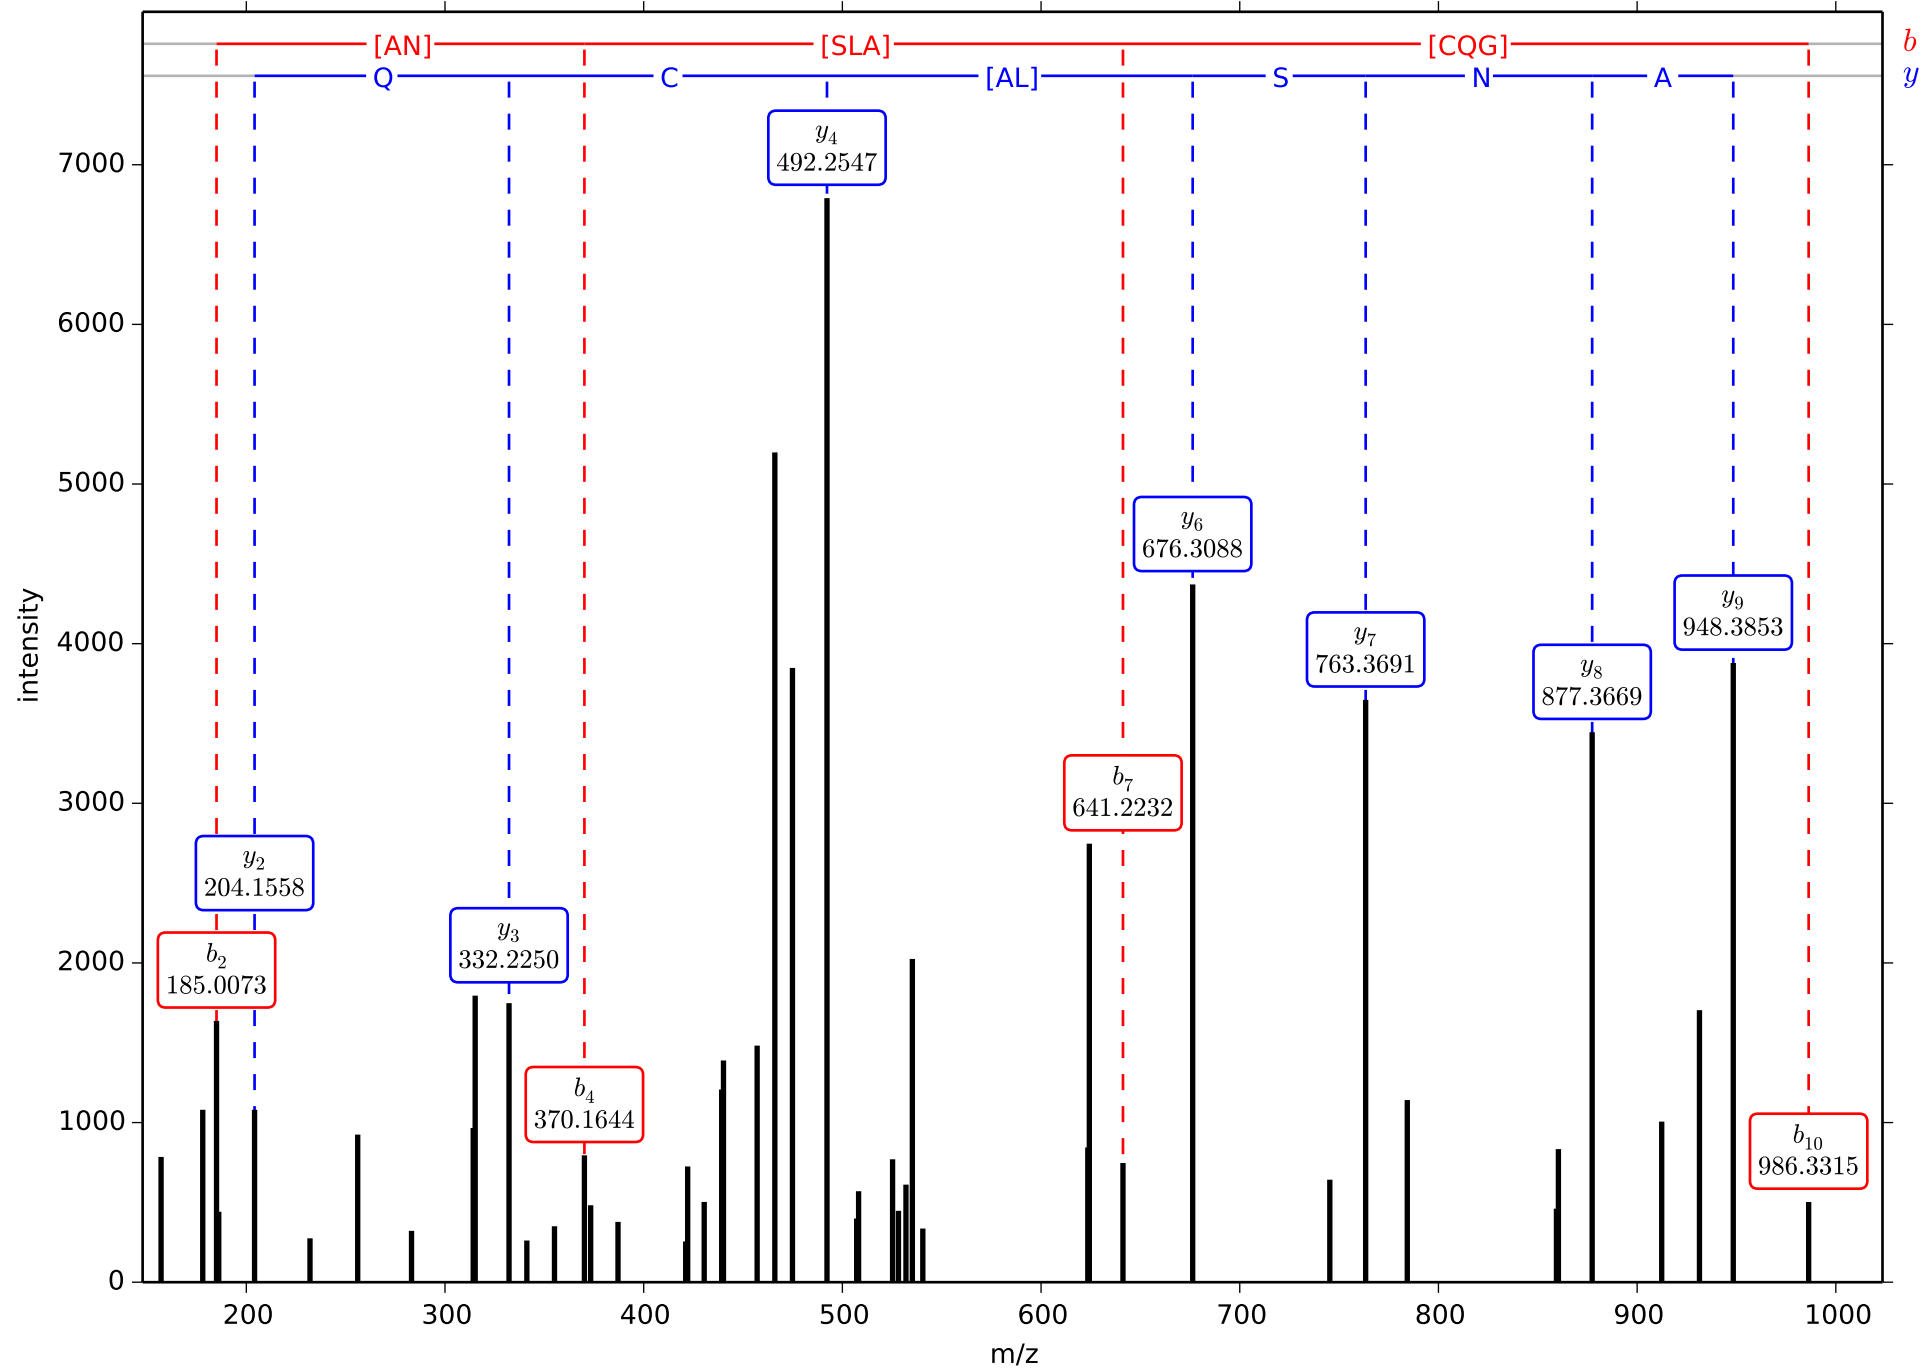

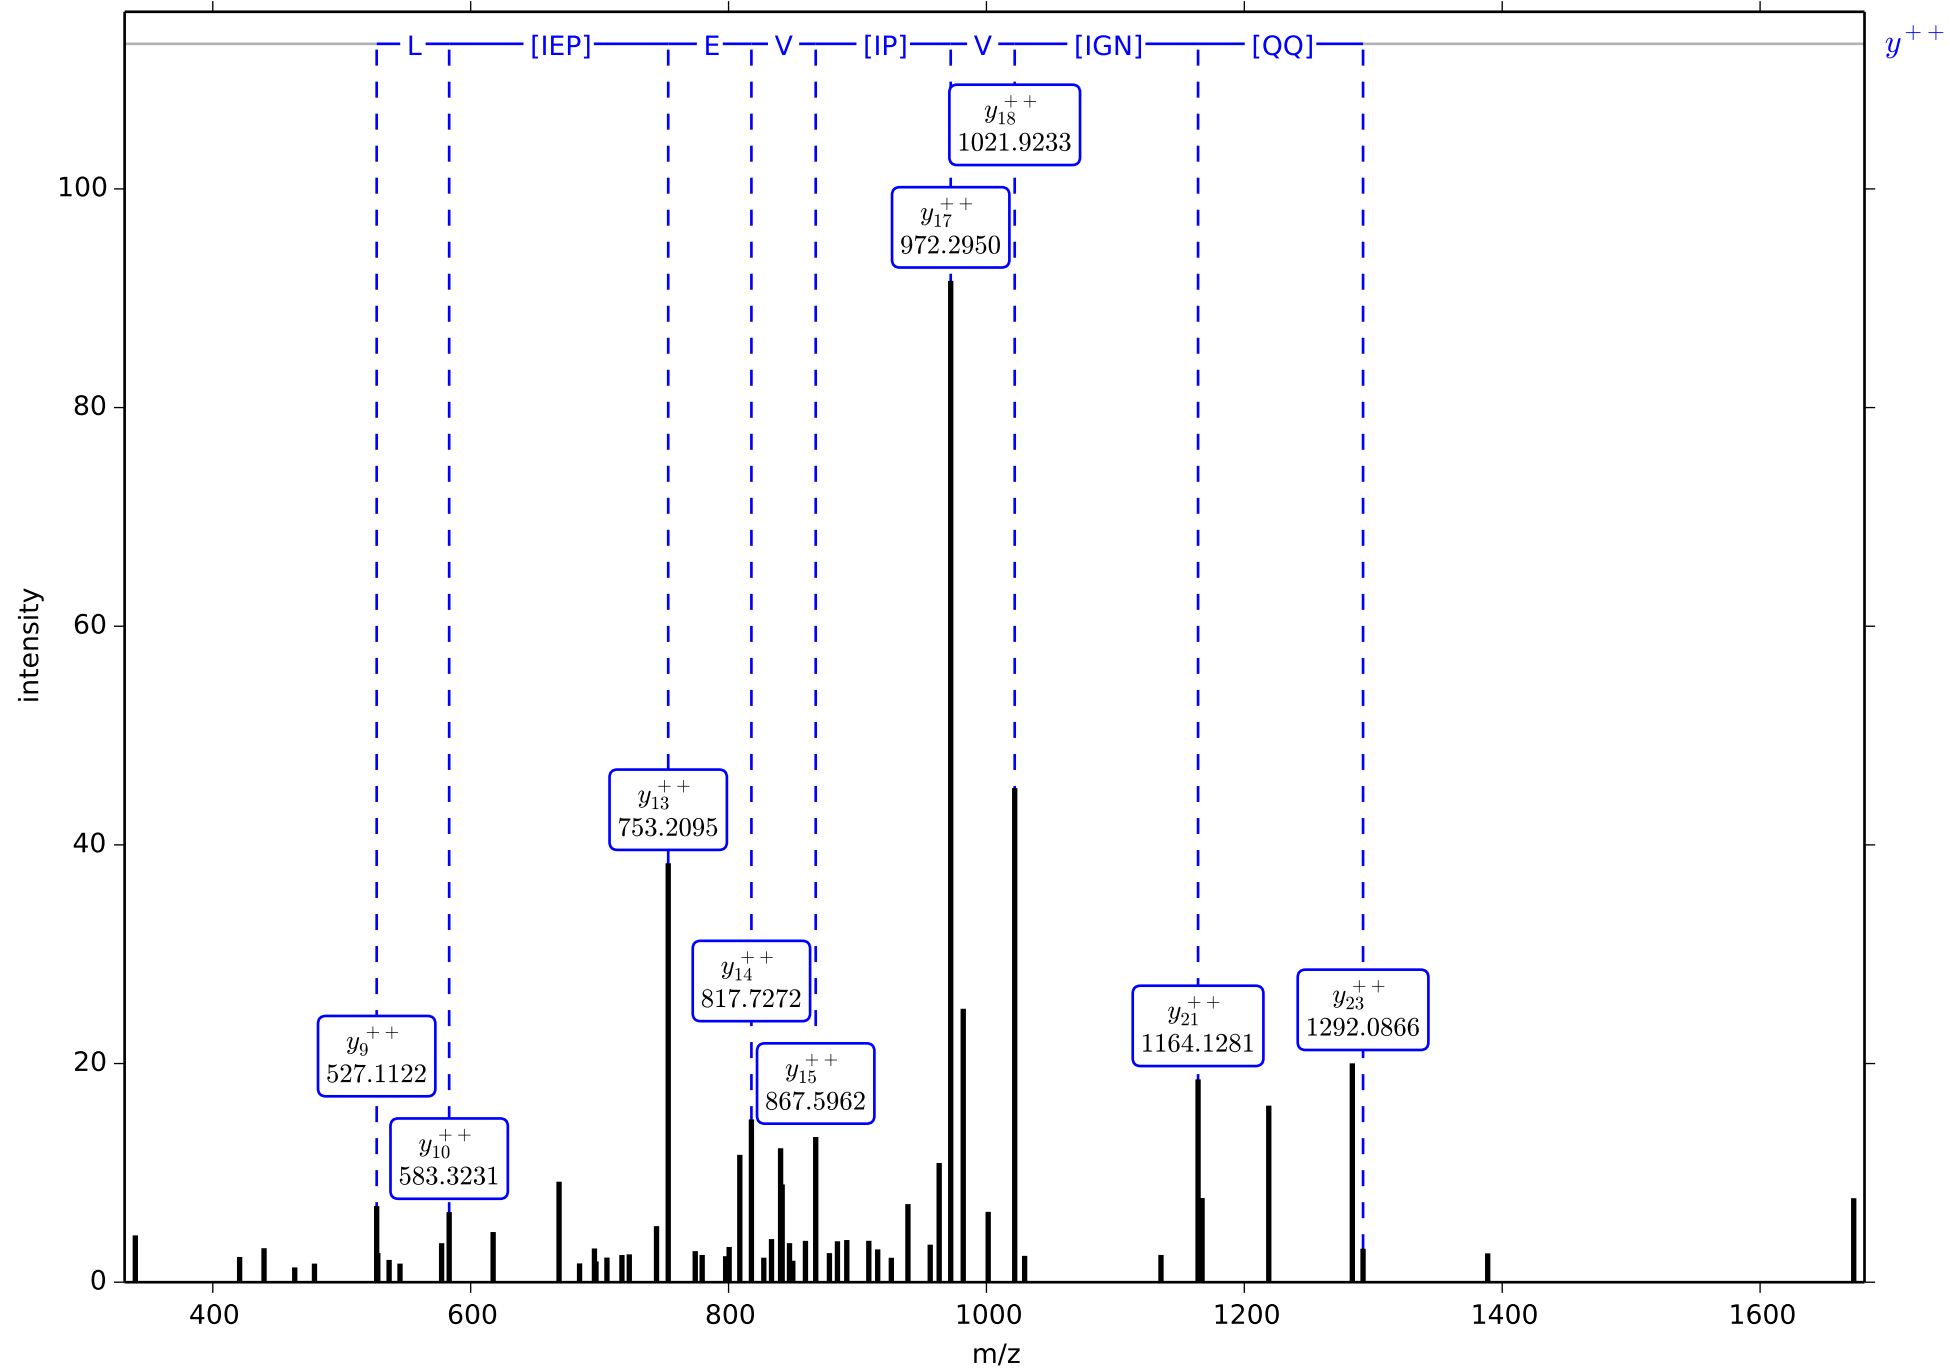

Q9CWF2 : EIVHIQAGQCGNQIGAK

parent: 911.974380,2+

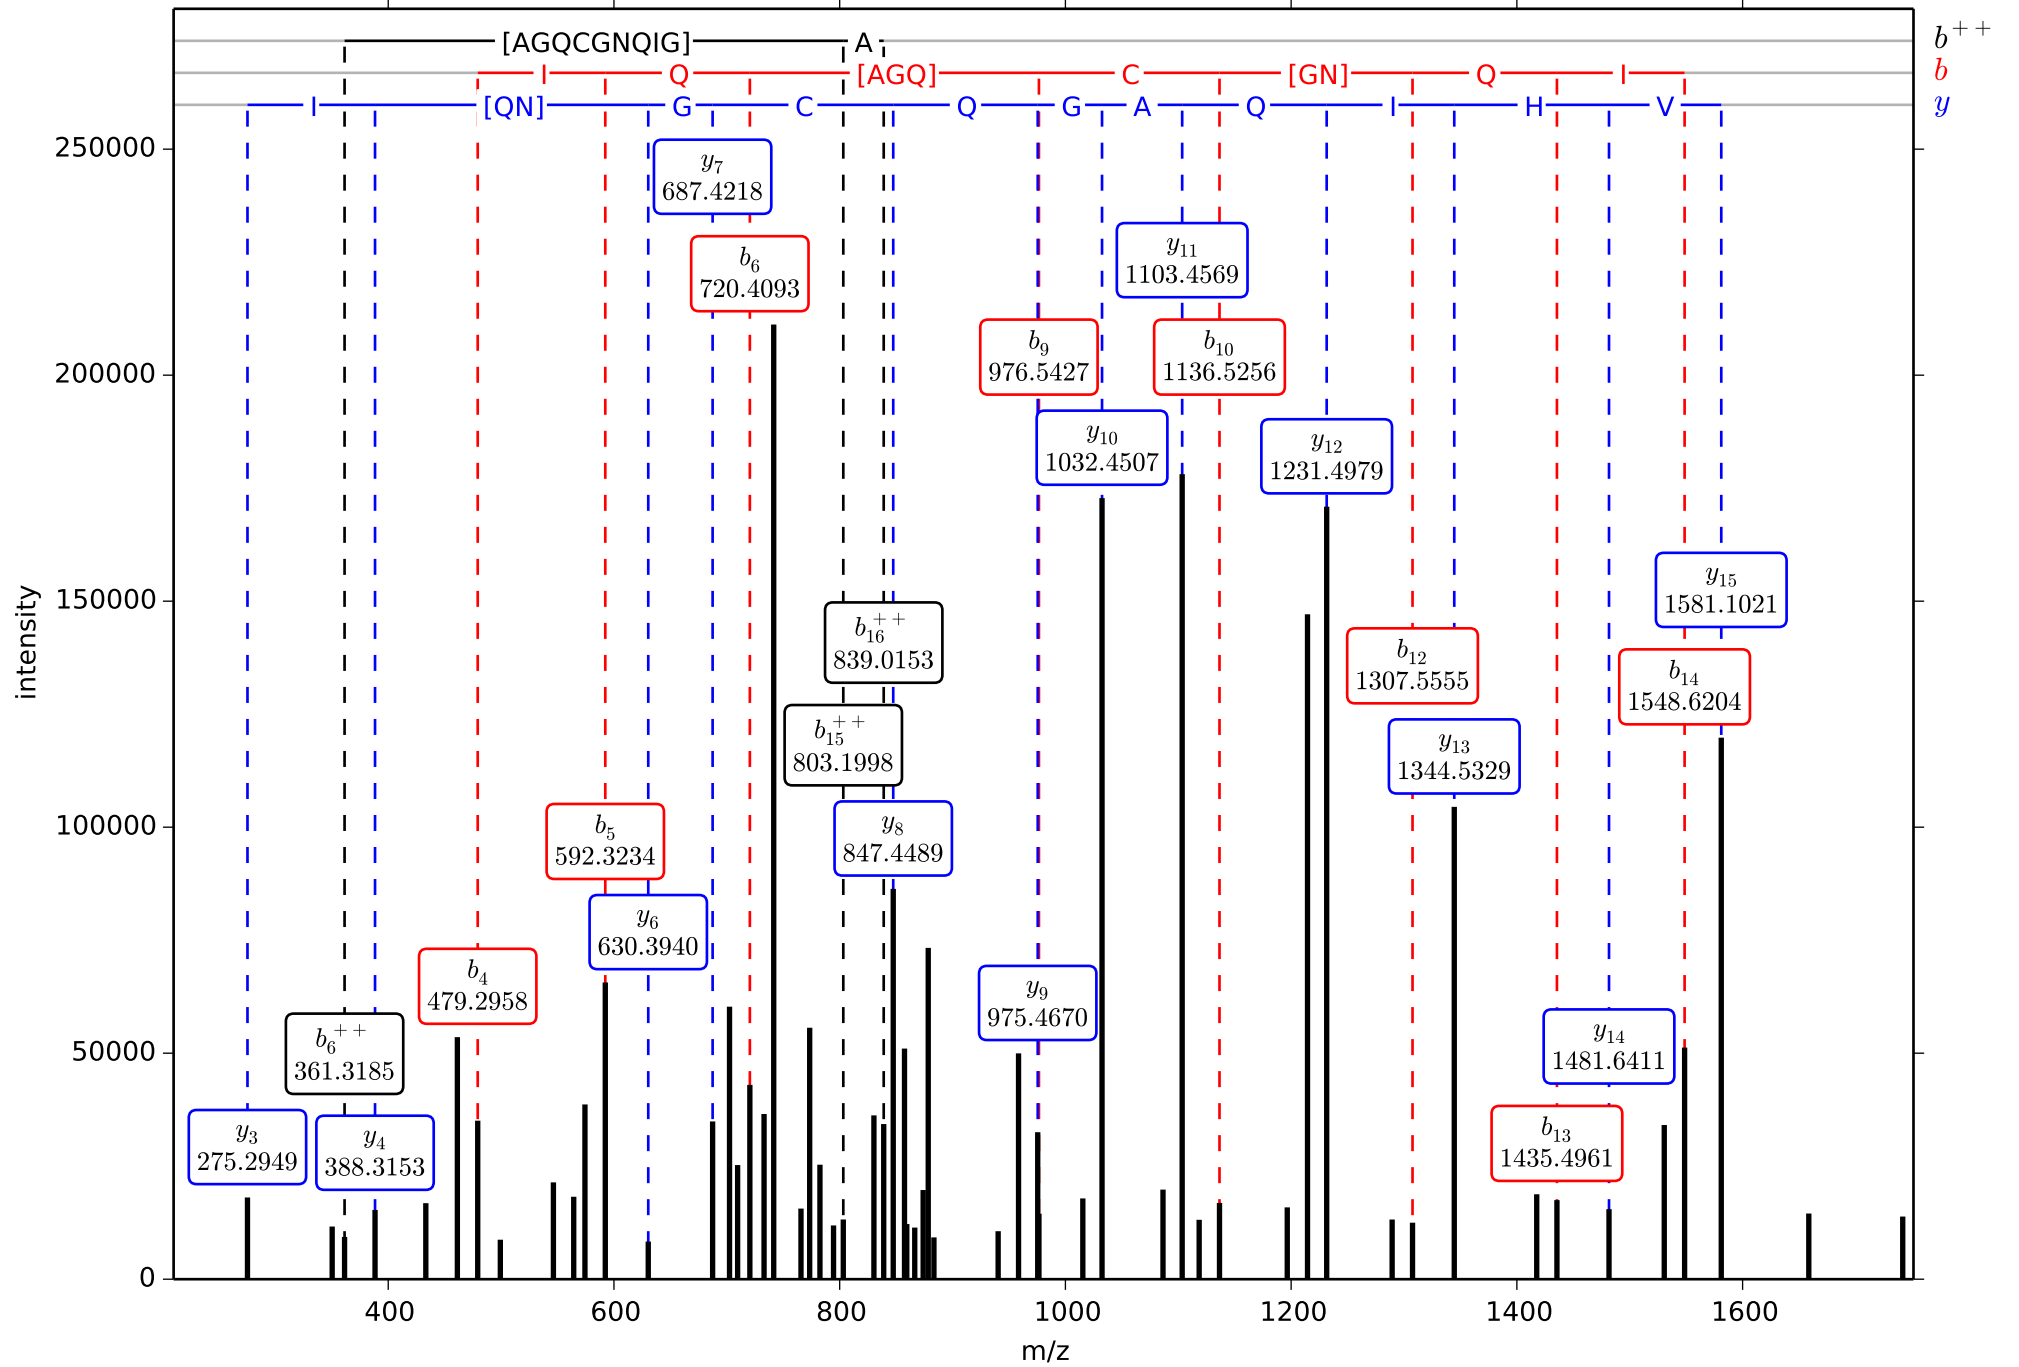

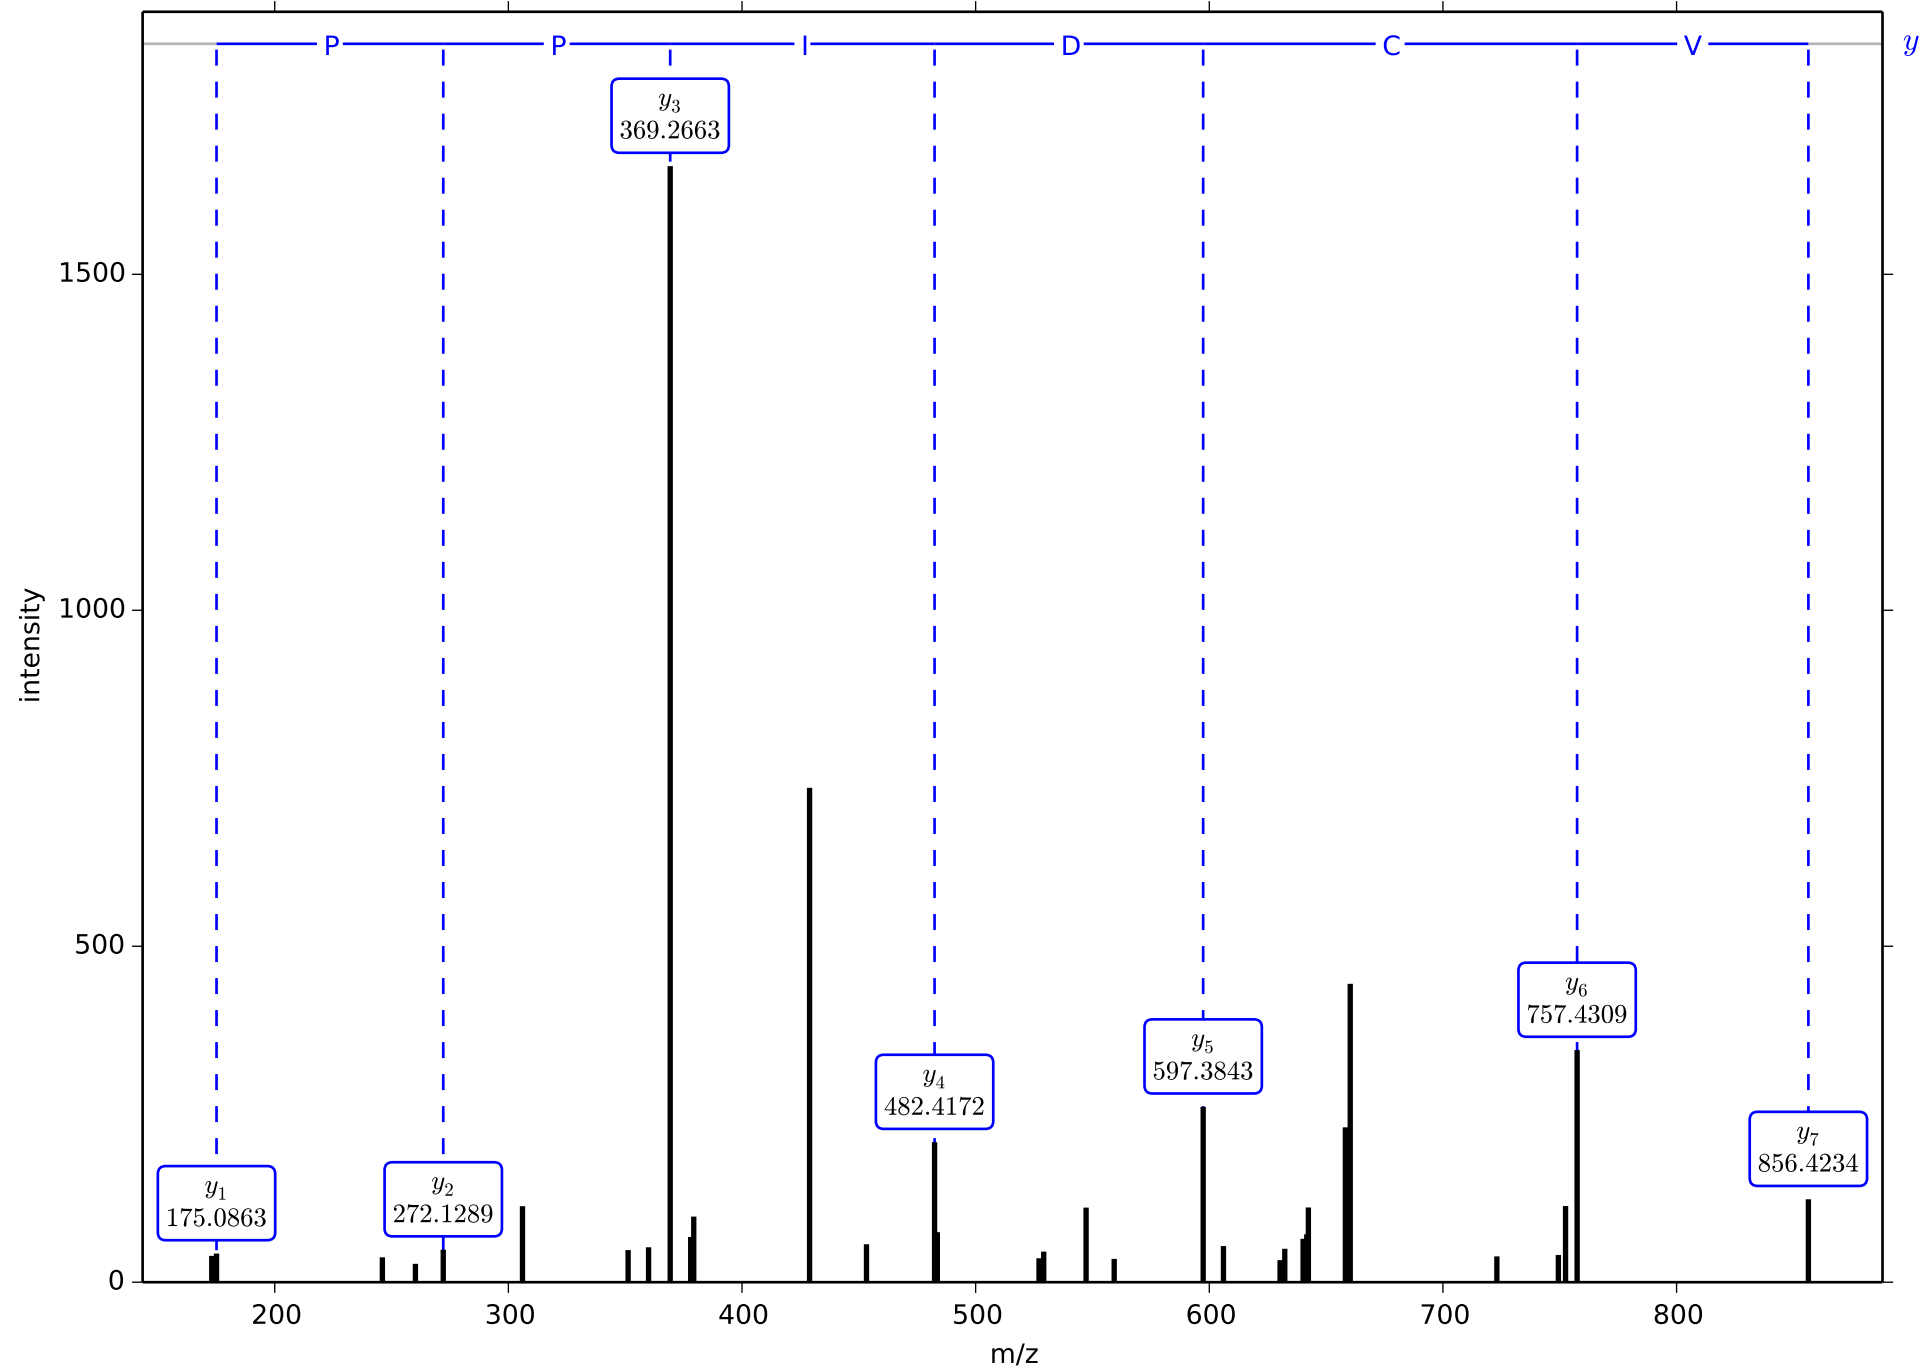

P18873 : LWGDSGIQECFNR

parent: 791.363770,2+

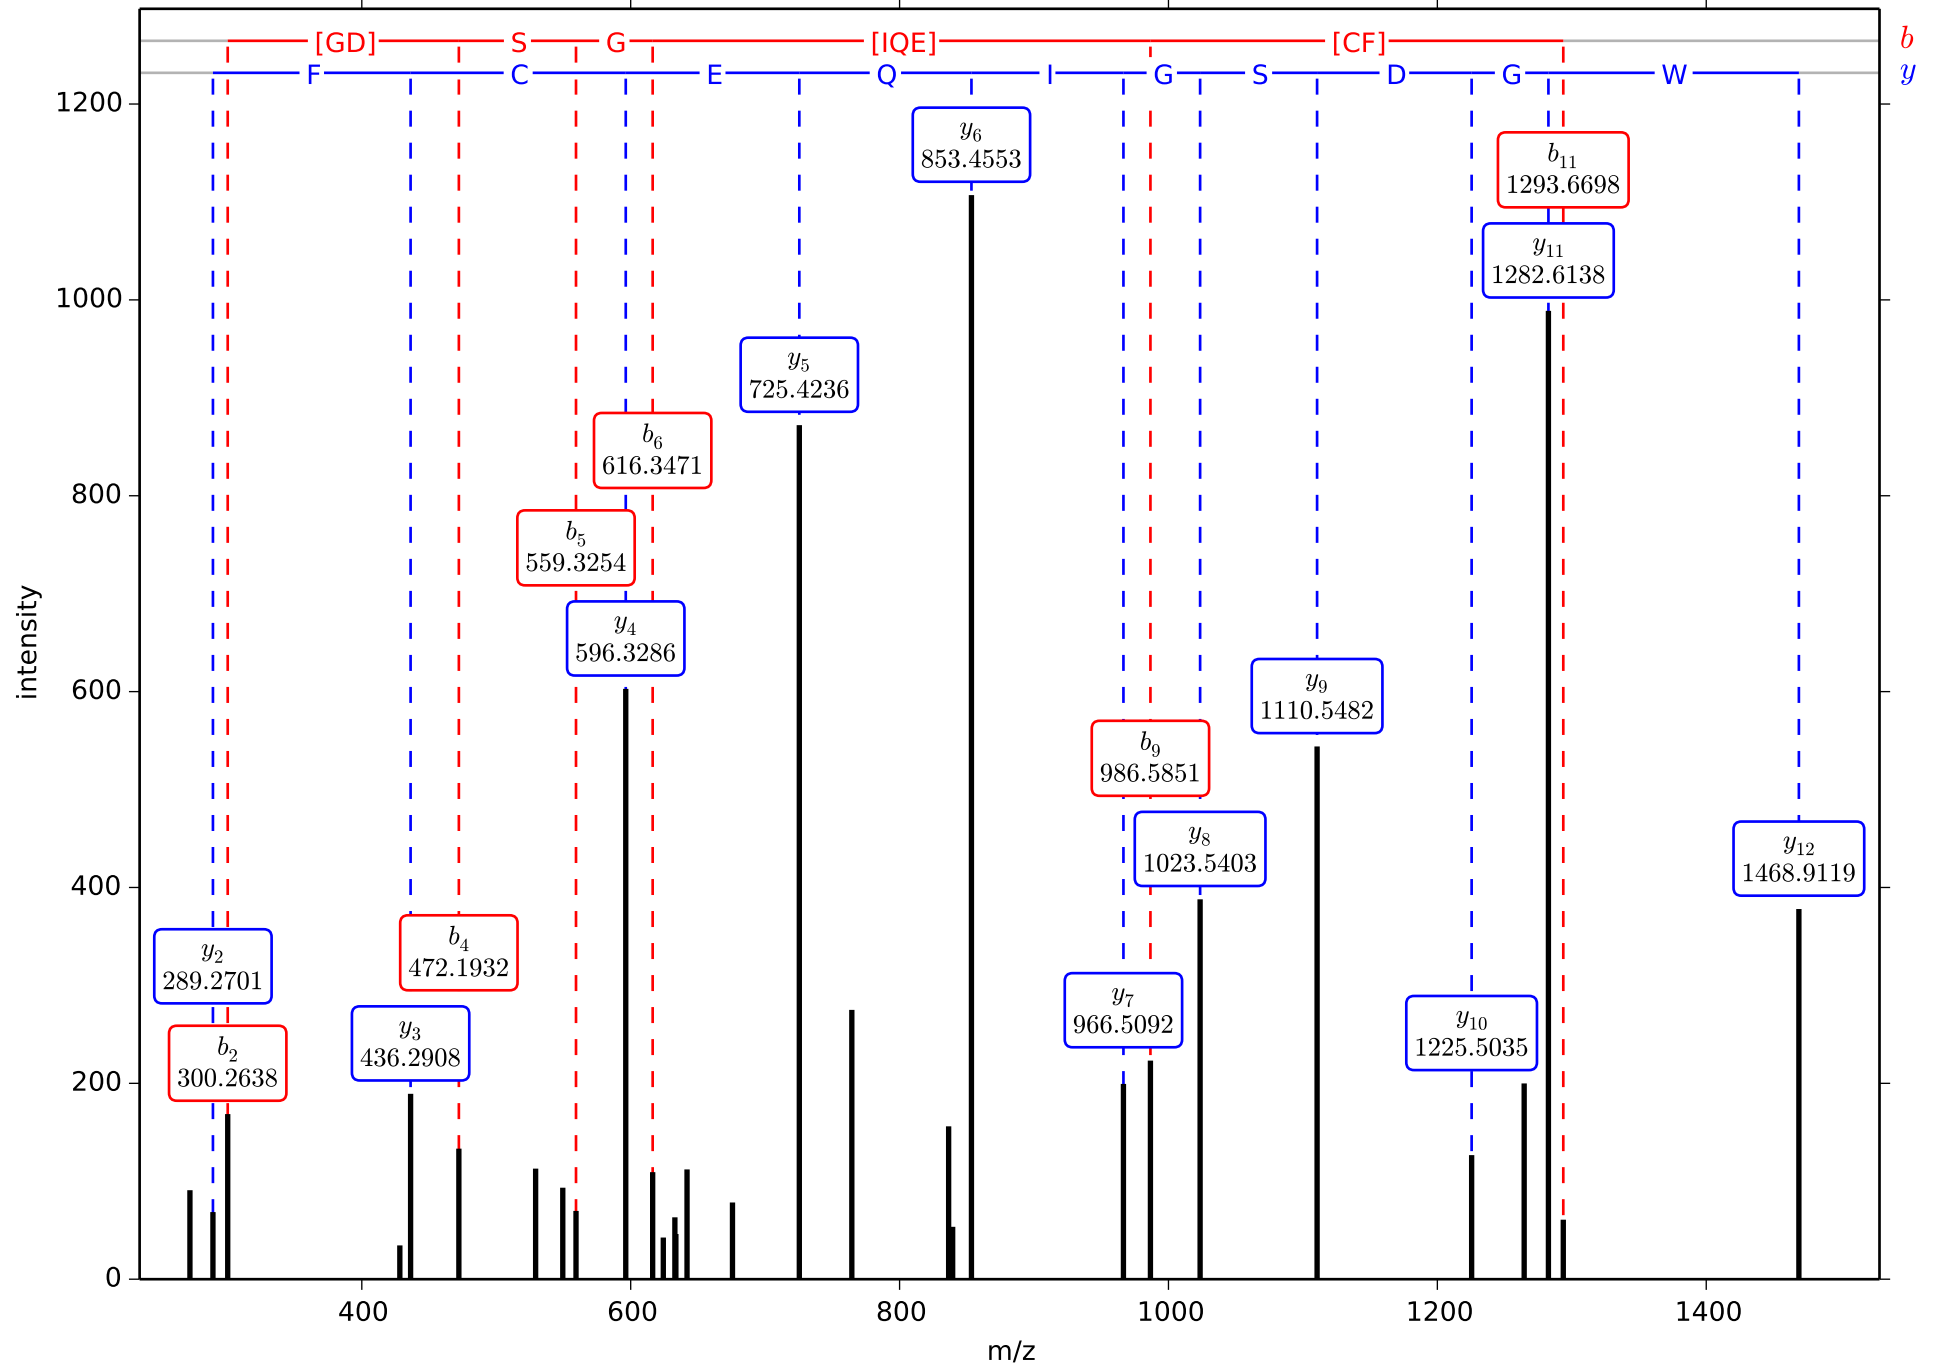

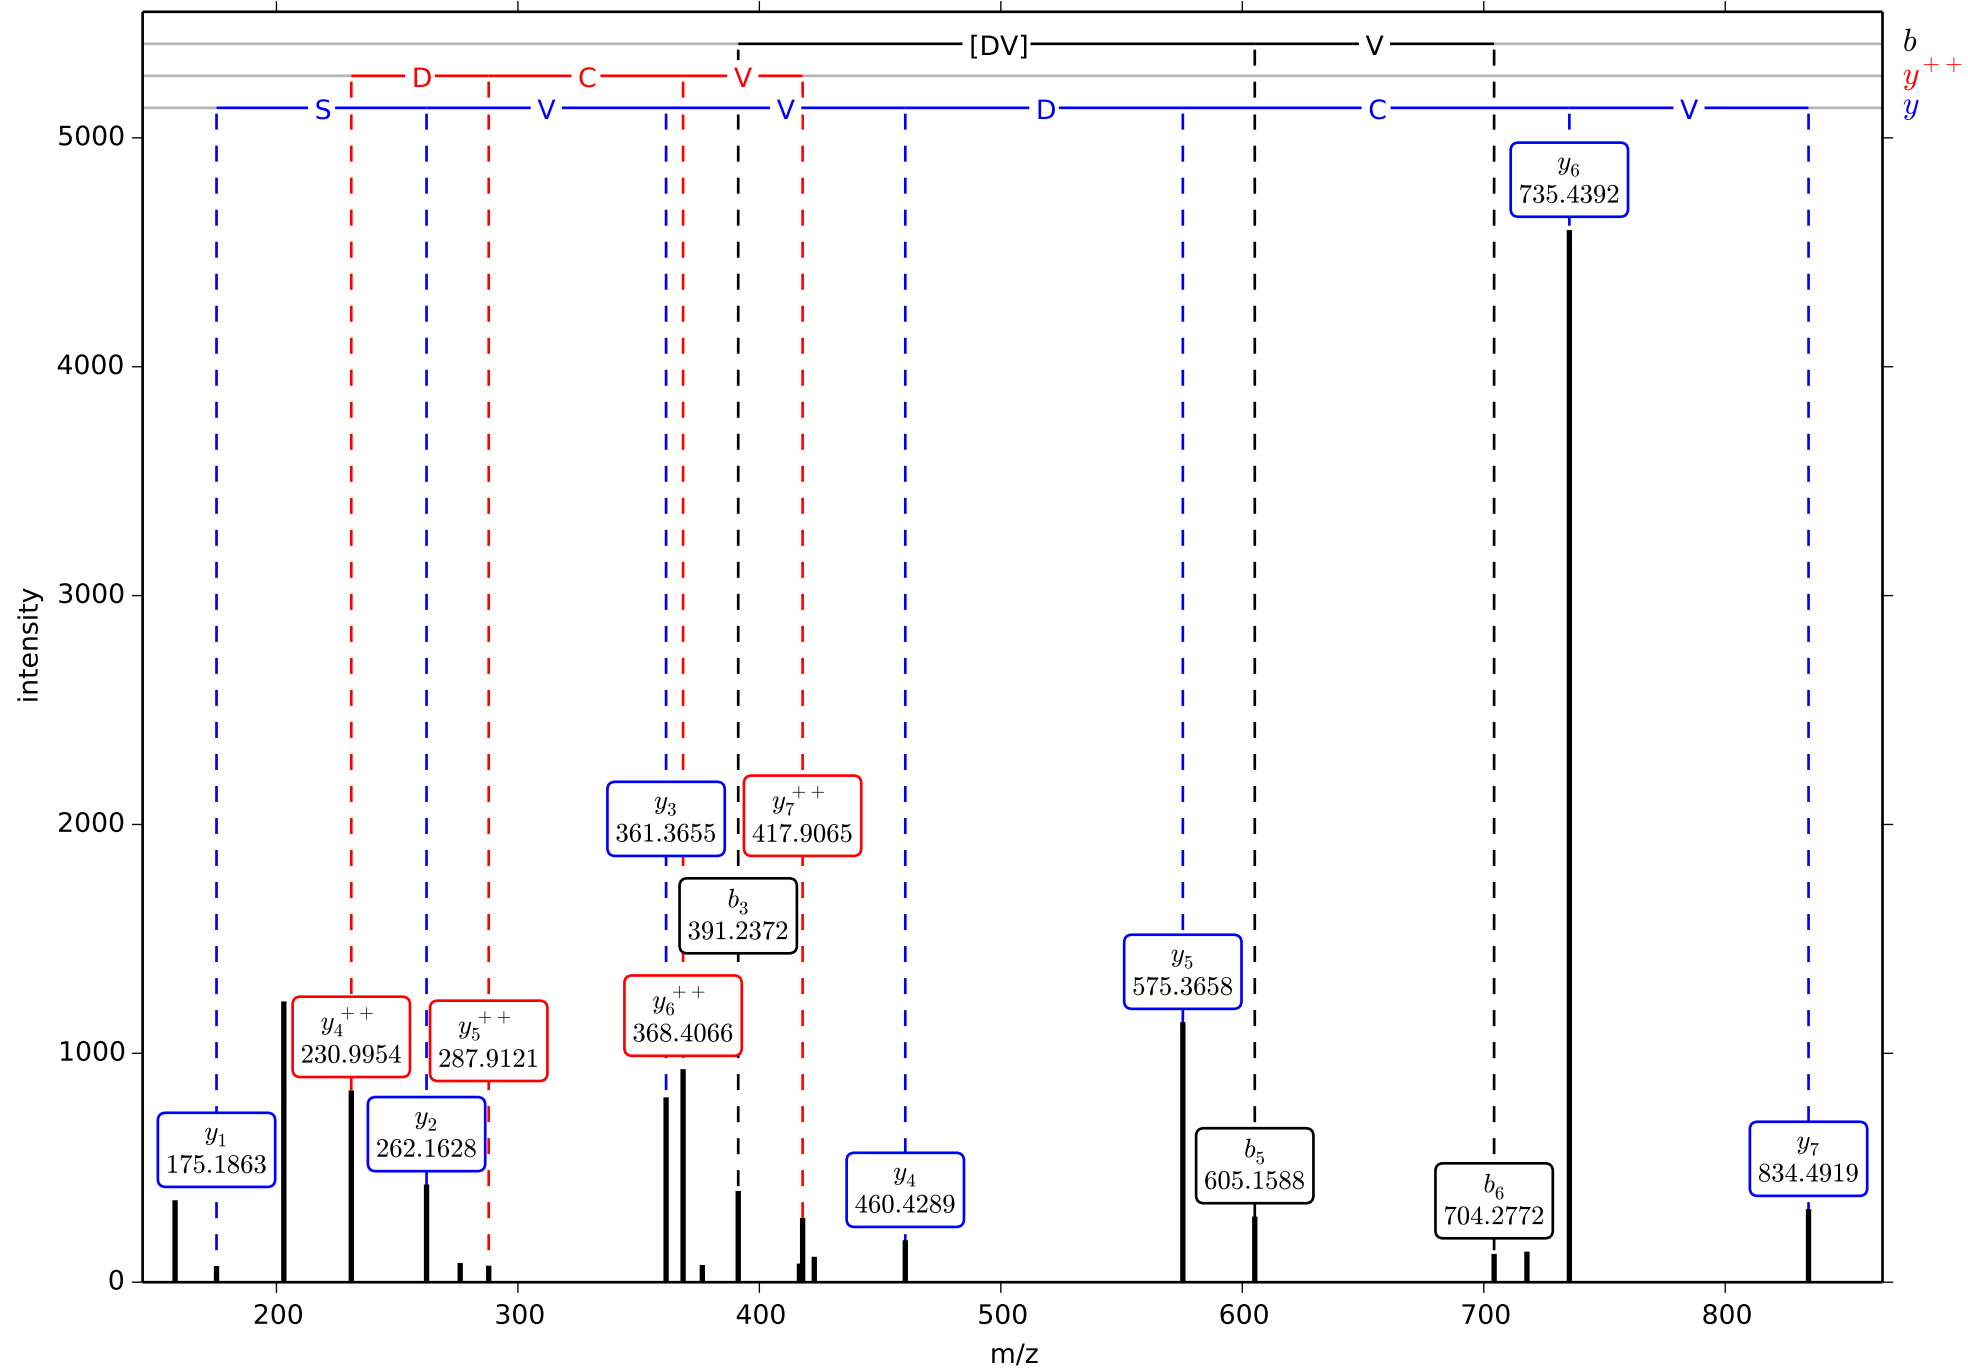

# Q64521 : CVINASGPFTDSVR

parent: 761.872830,2+

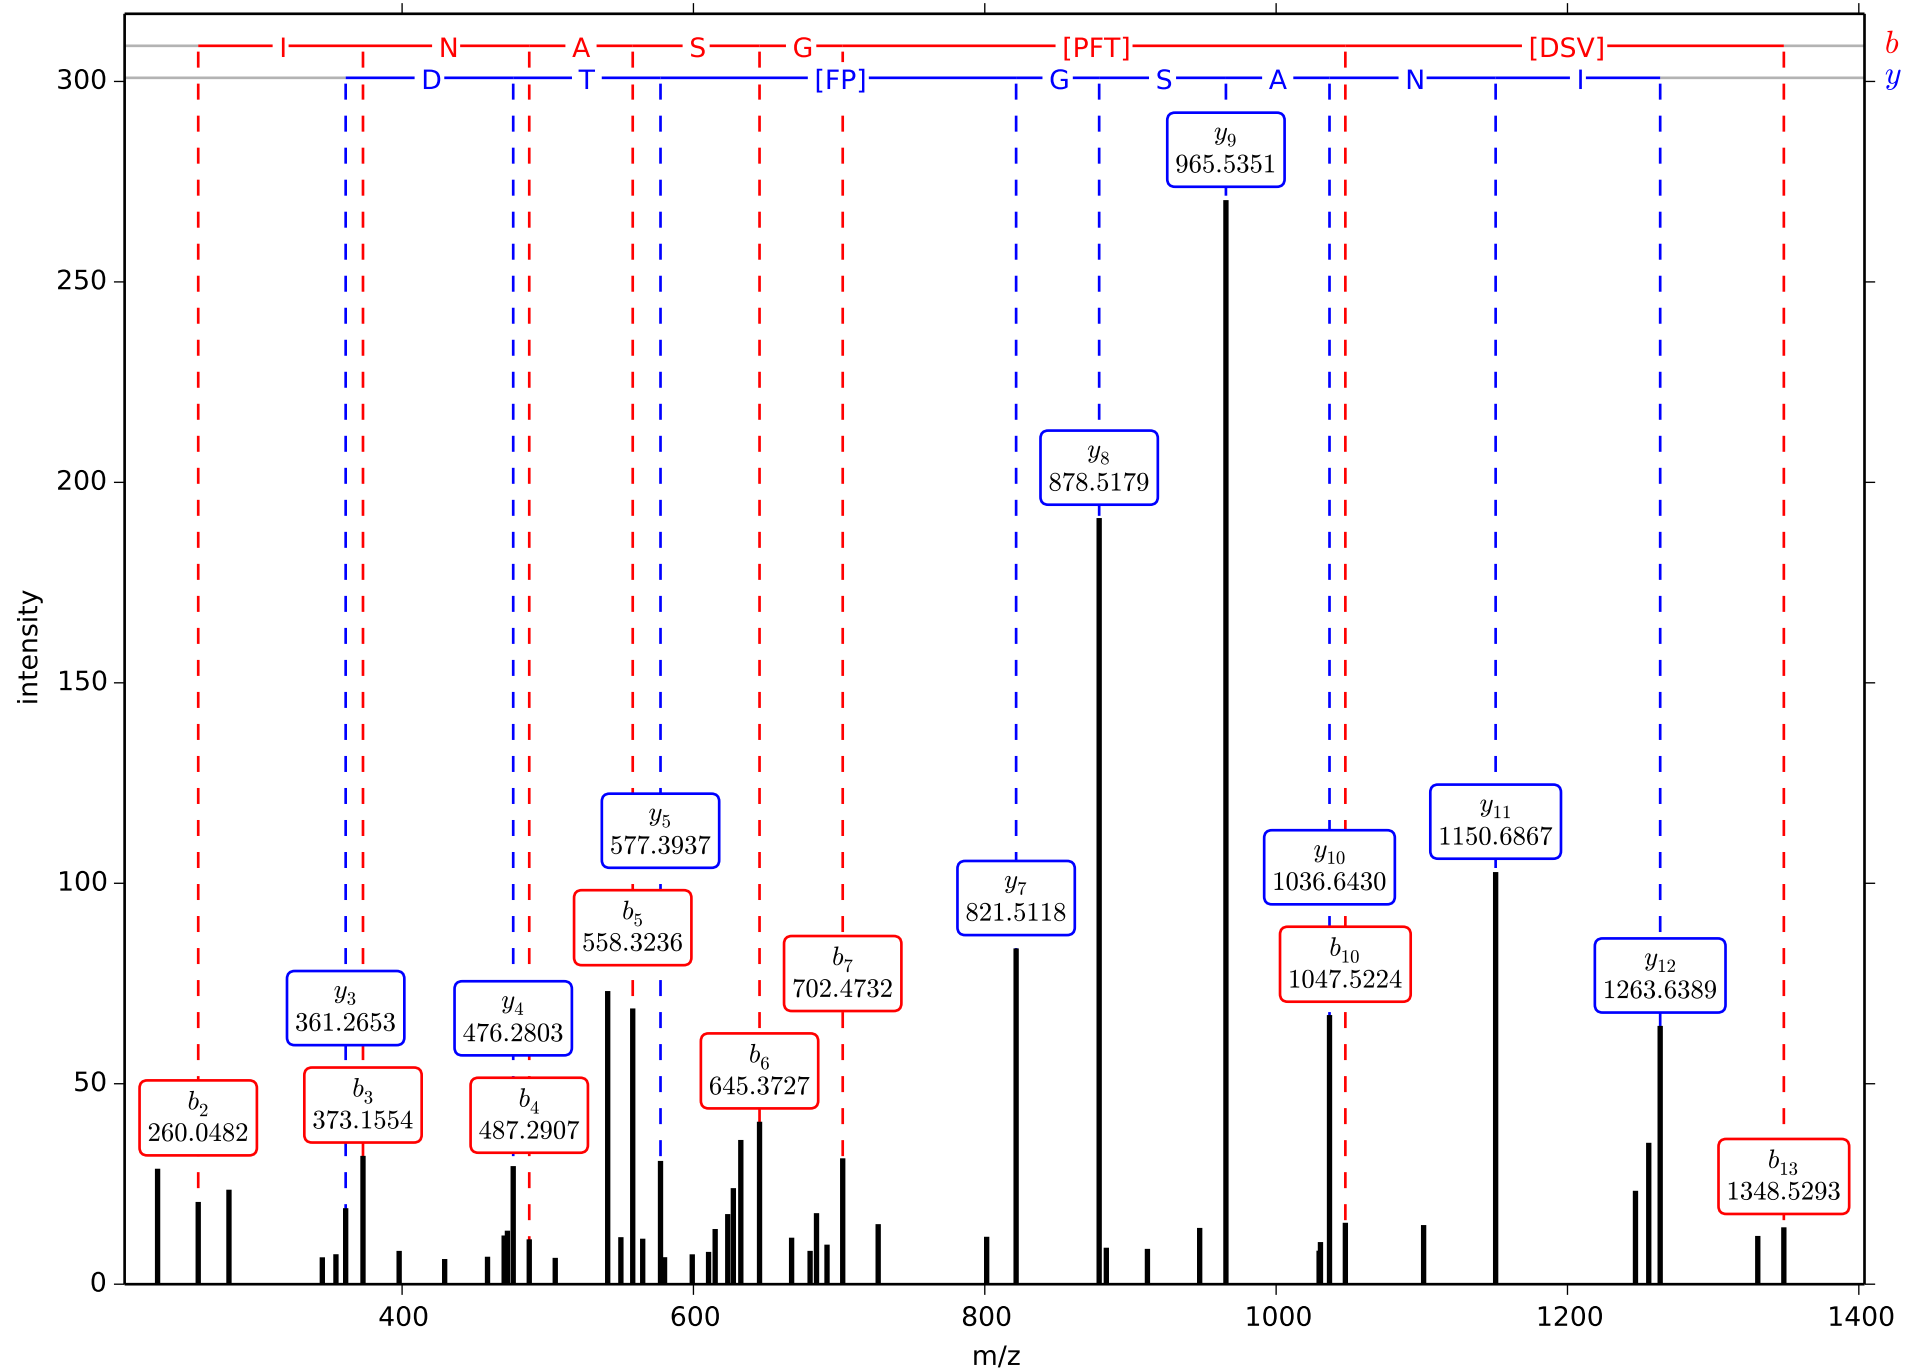



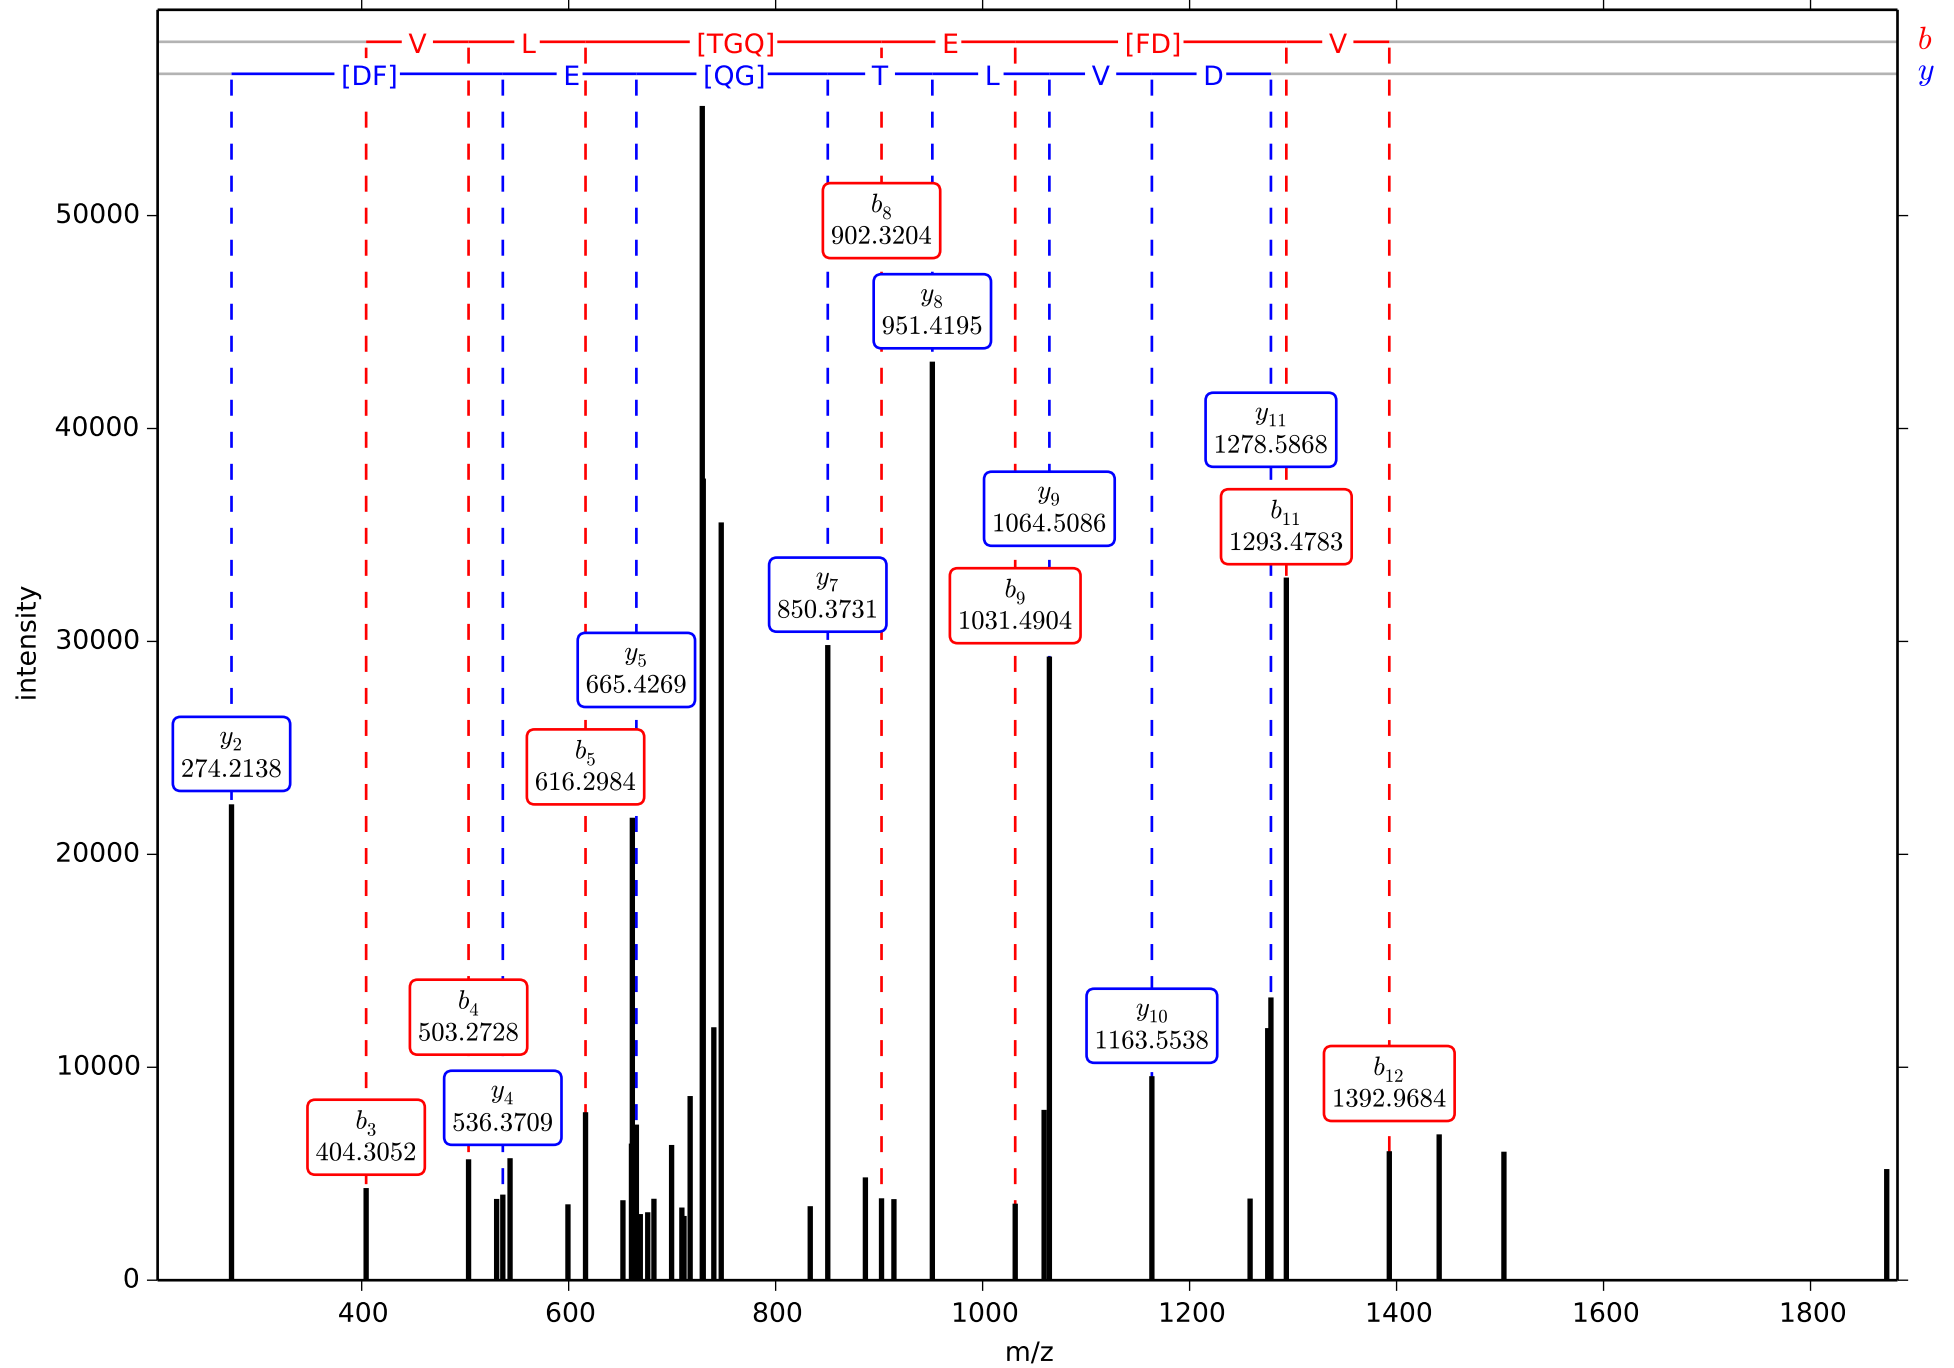

Q99KI0 : CTTDHISAAGPWLK

parent: 519.588310,3+

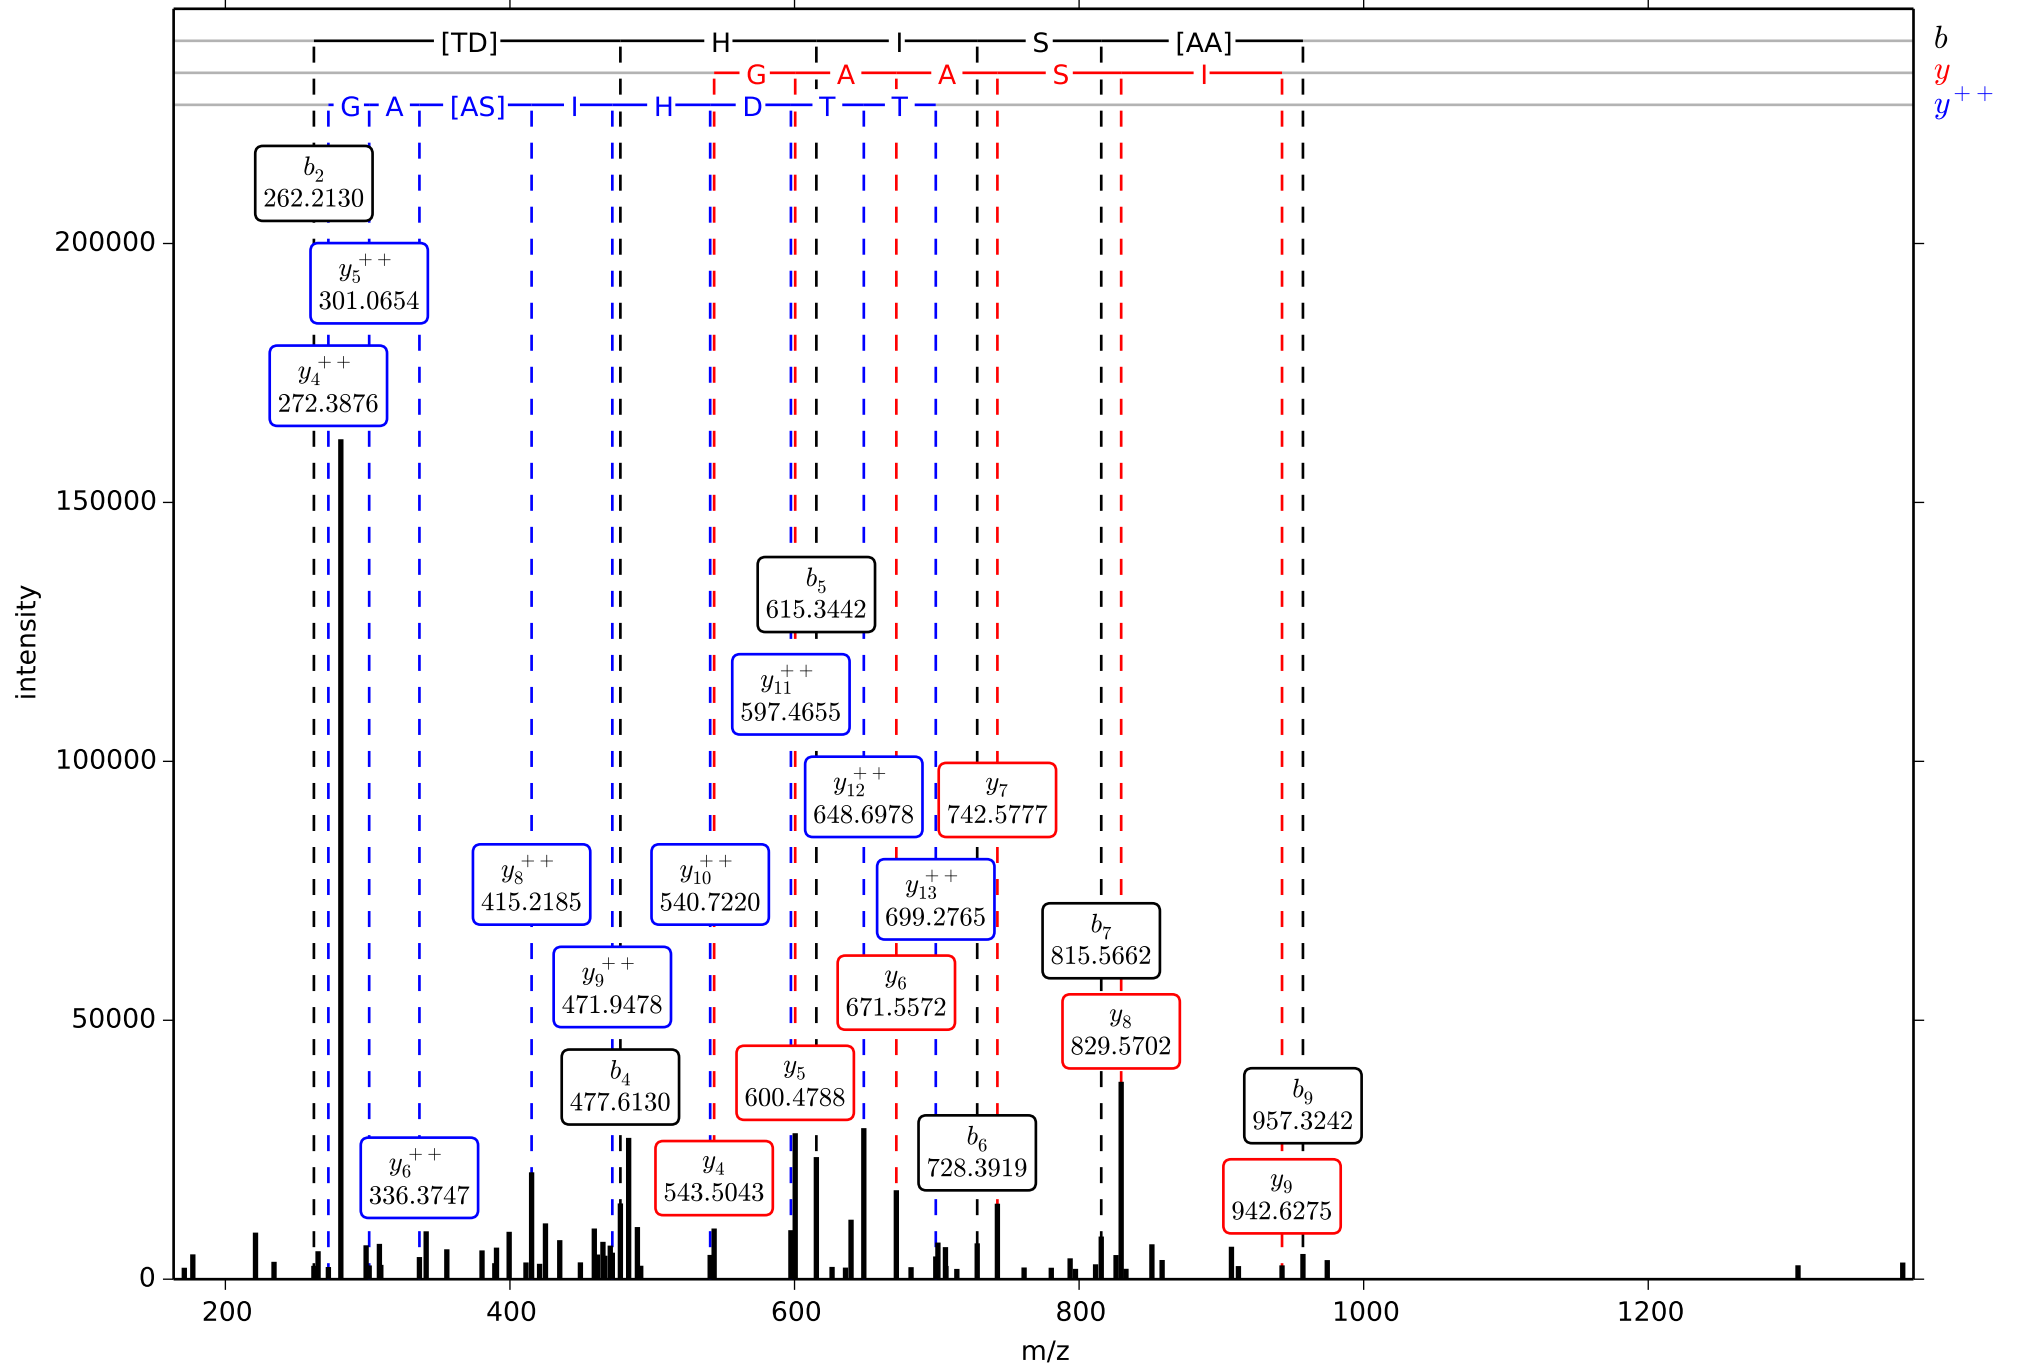

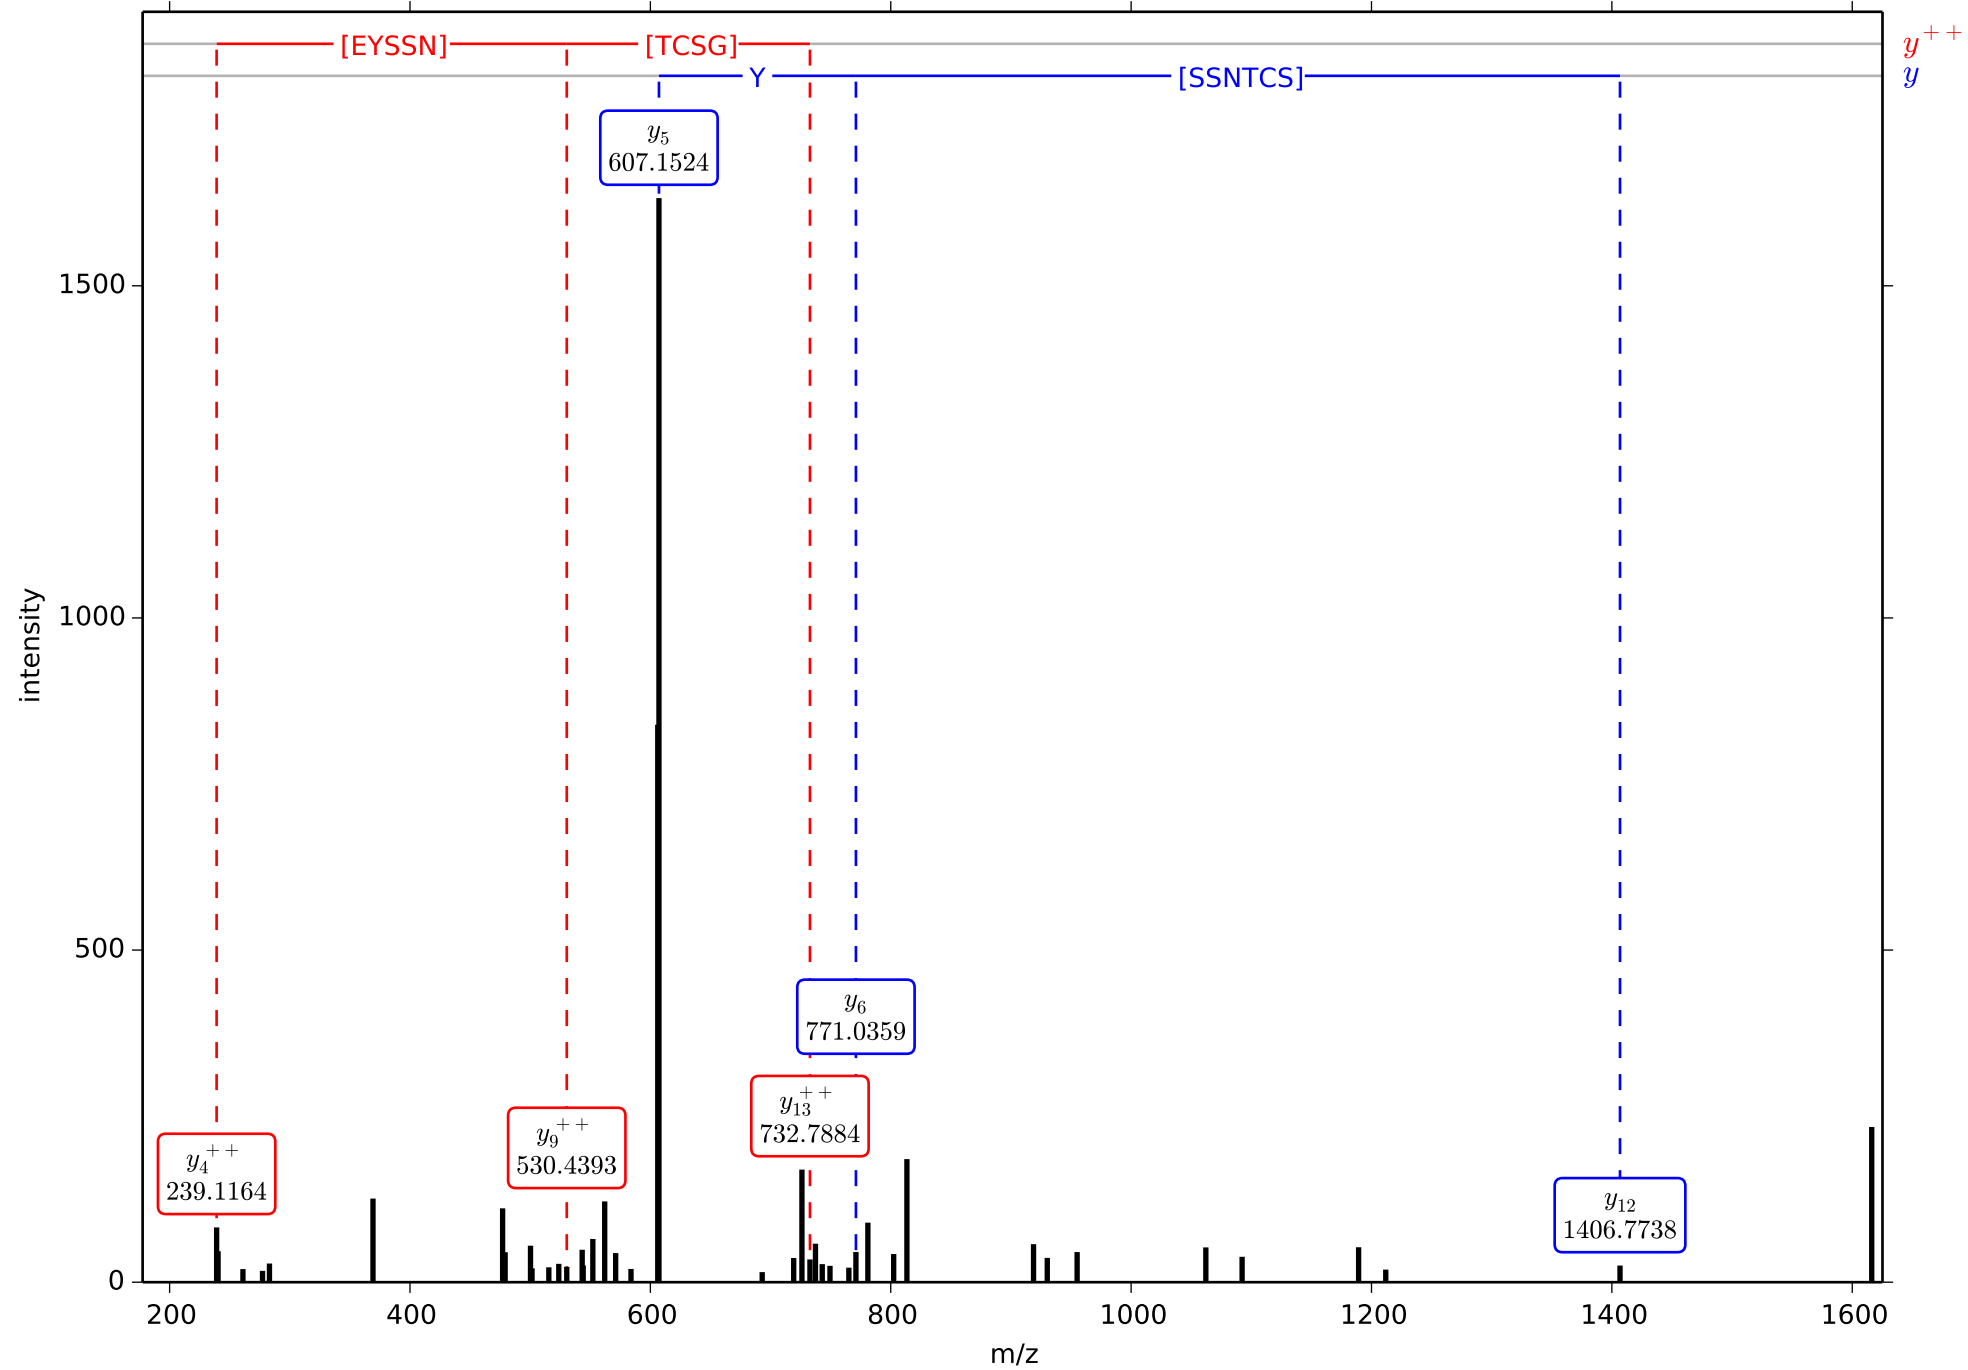

Q80TL4 : LTEAPSCSVSISHVGPADSSPAASSSK

parent: 914.787260,3+

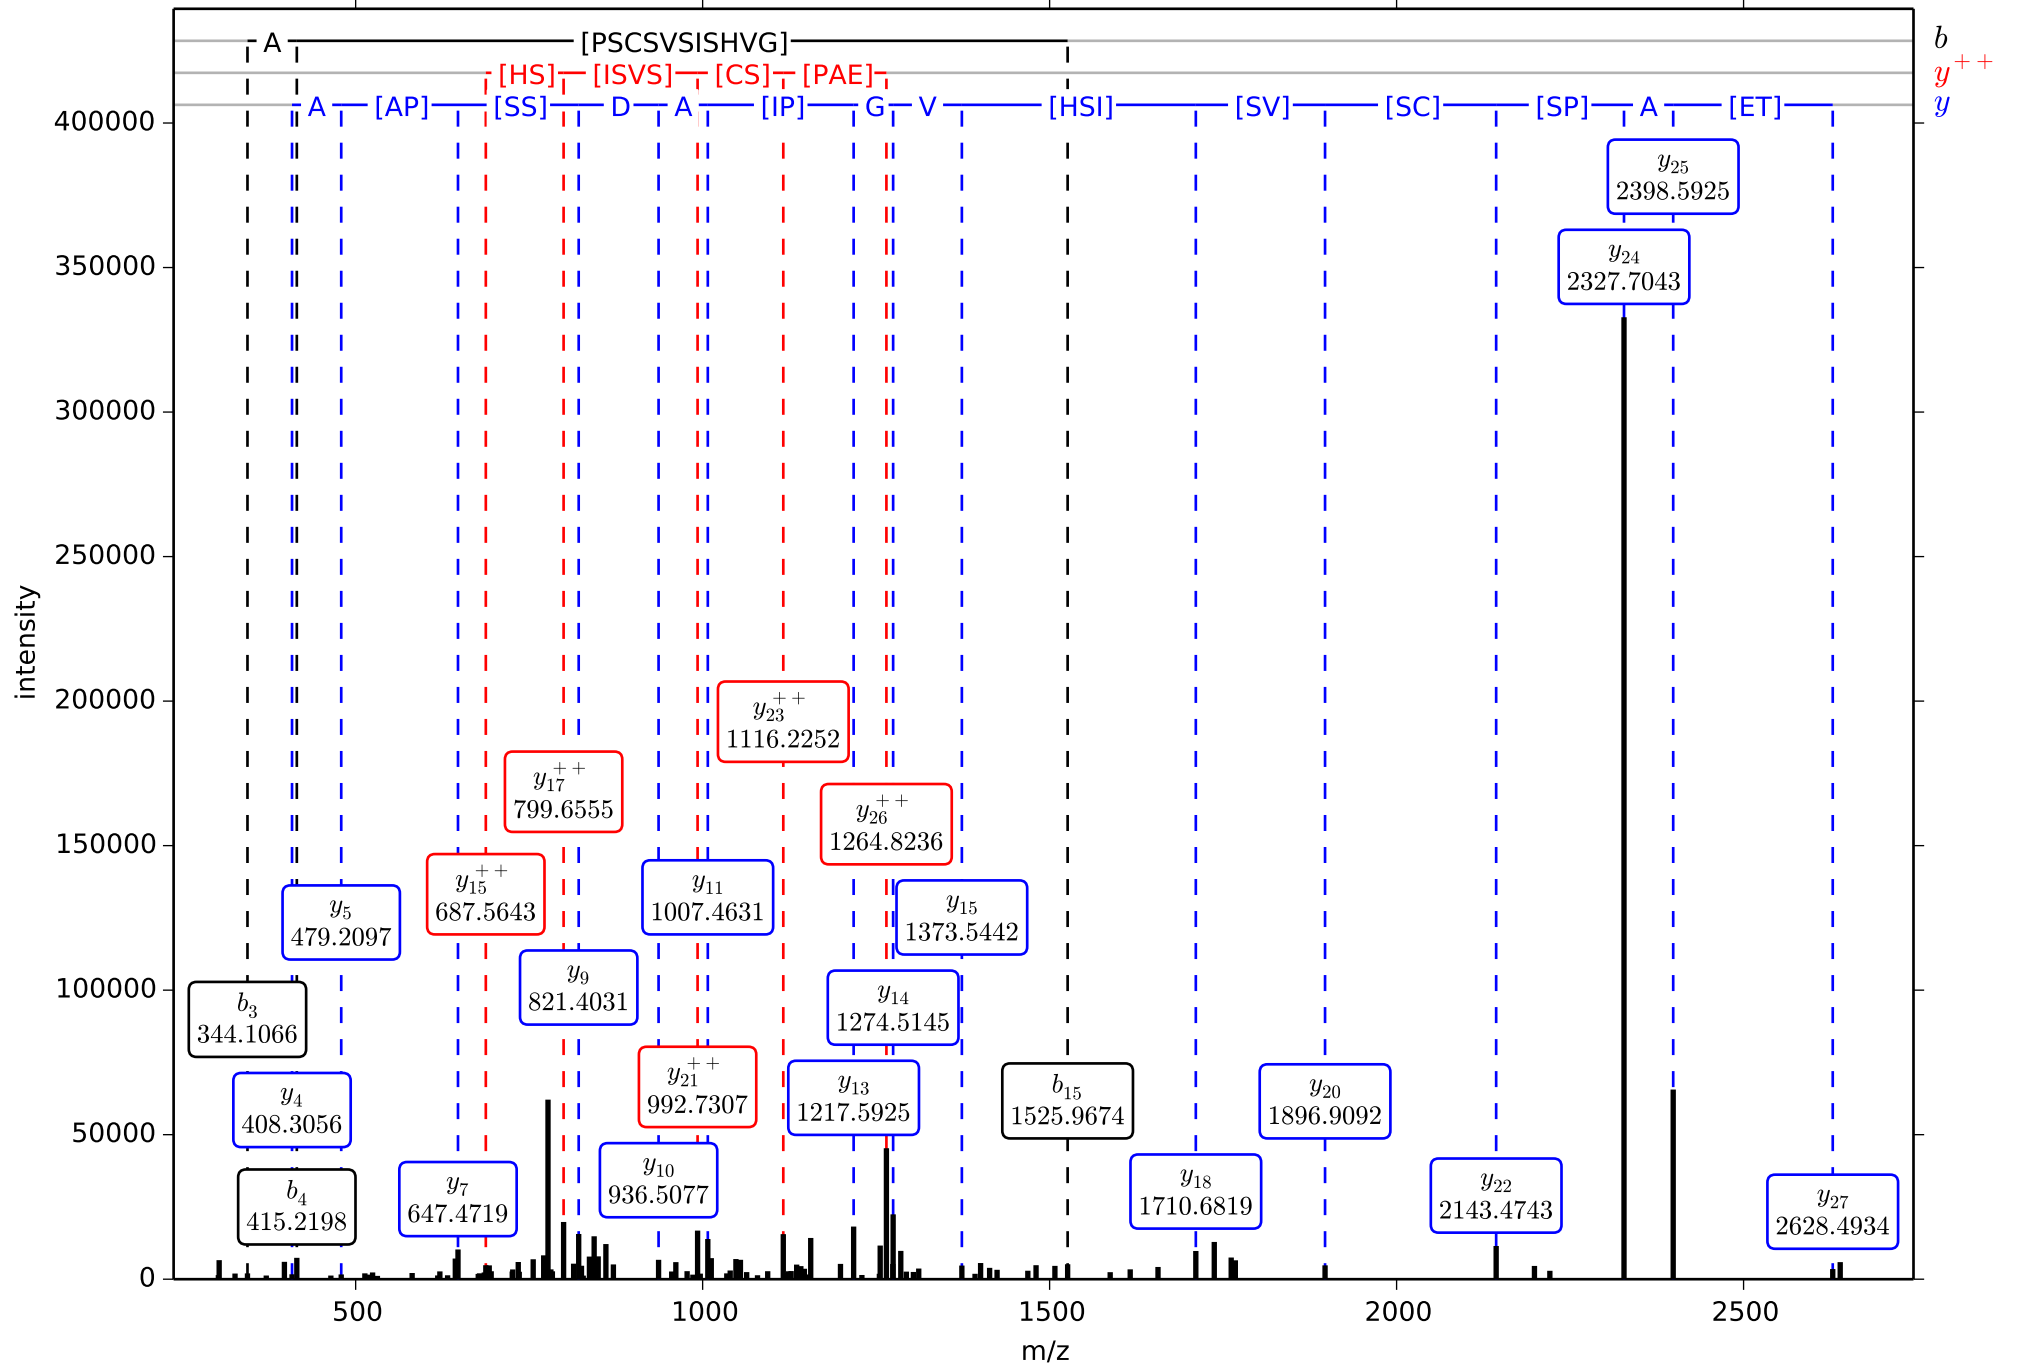

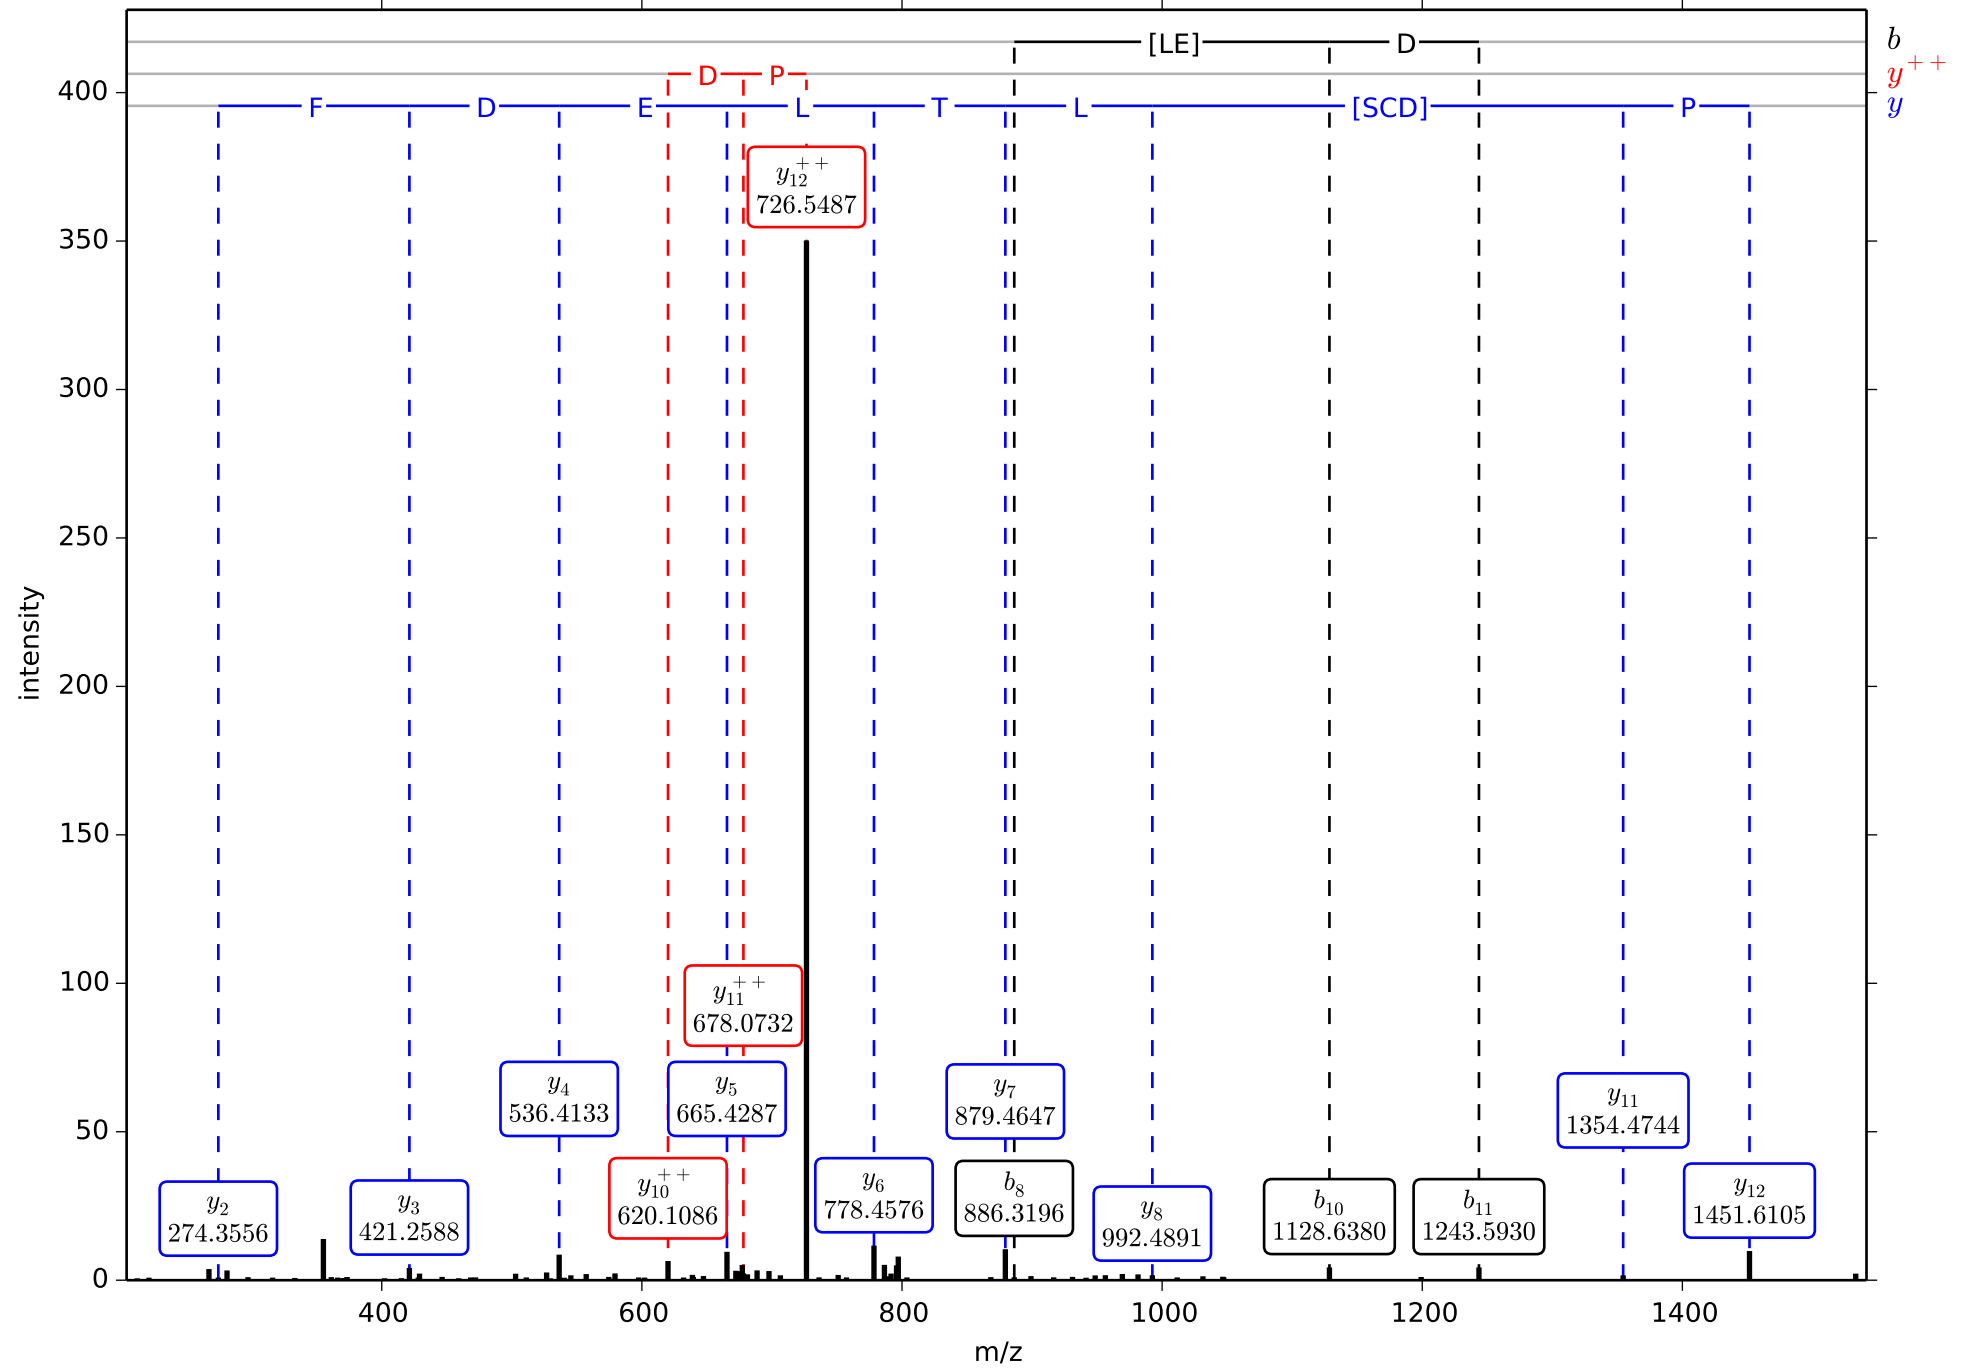

P13595 : FFLCQVAGDAK

parent: 628.30900,2+

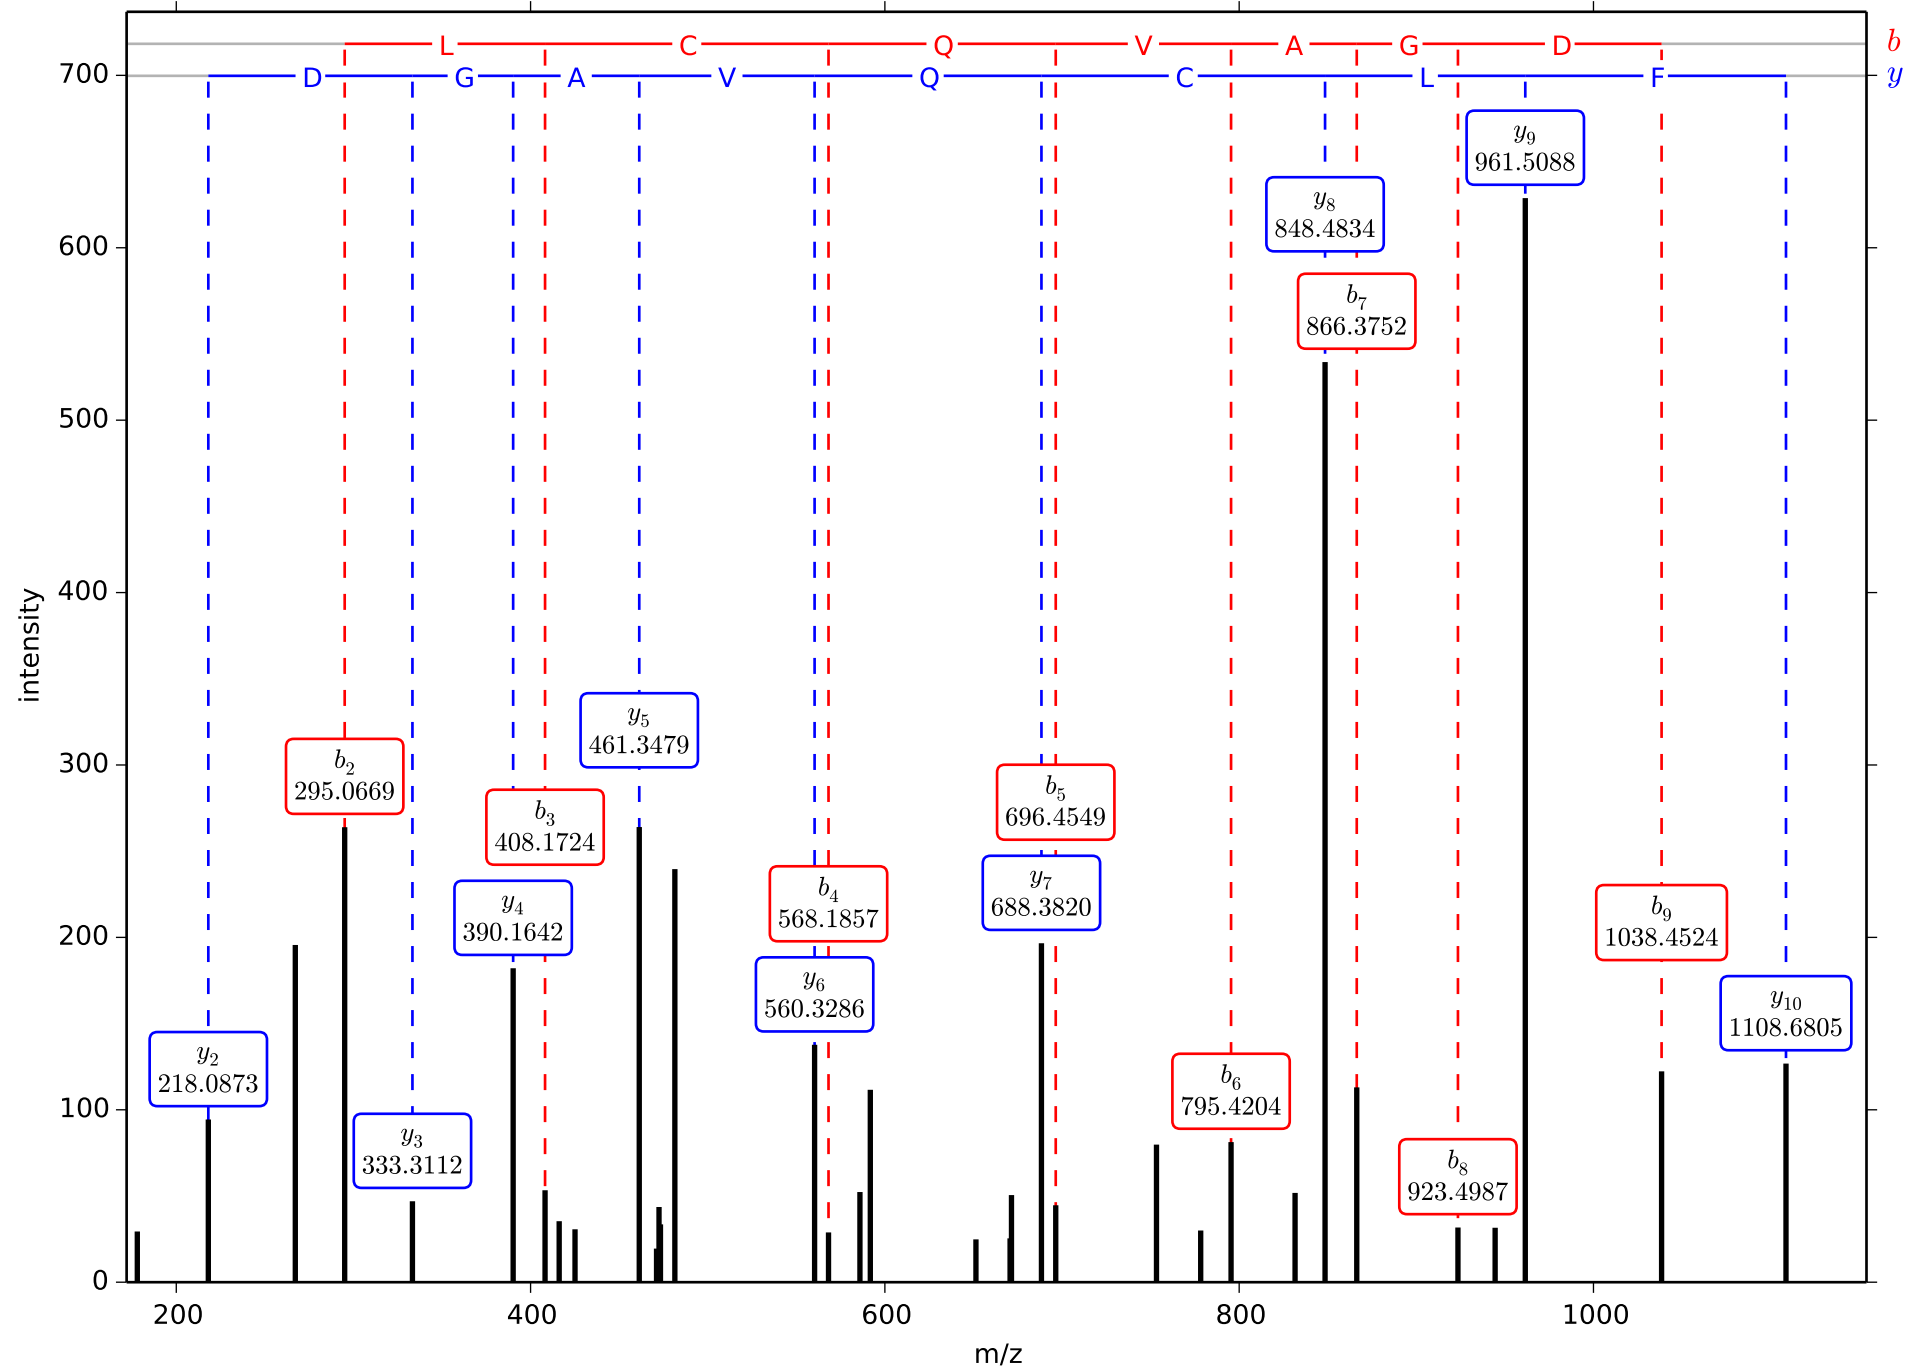

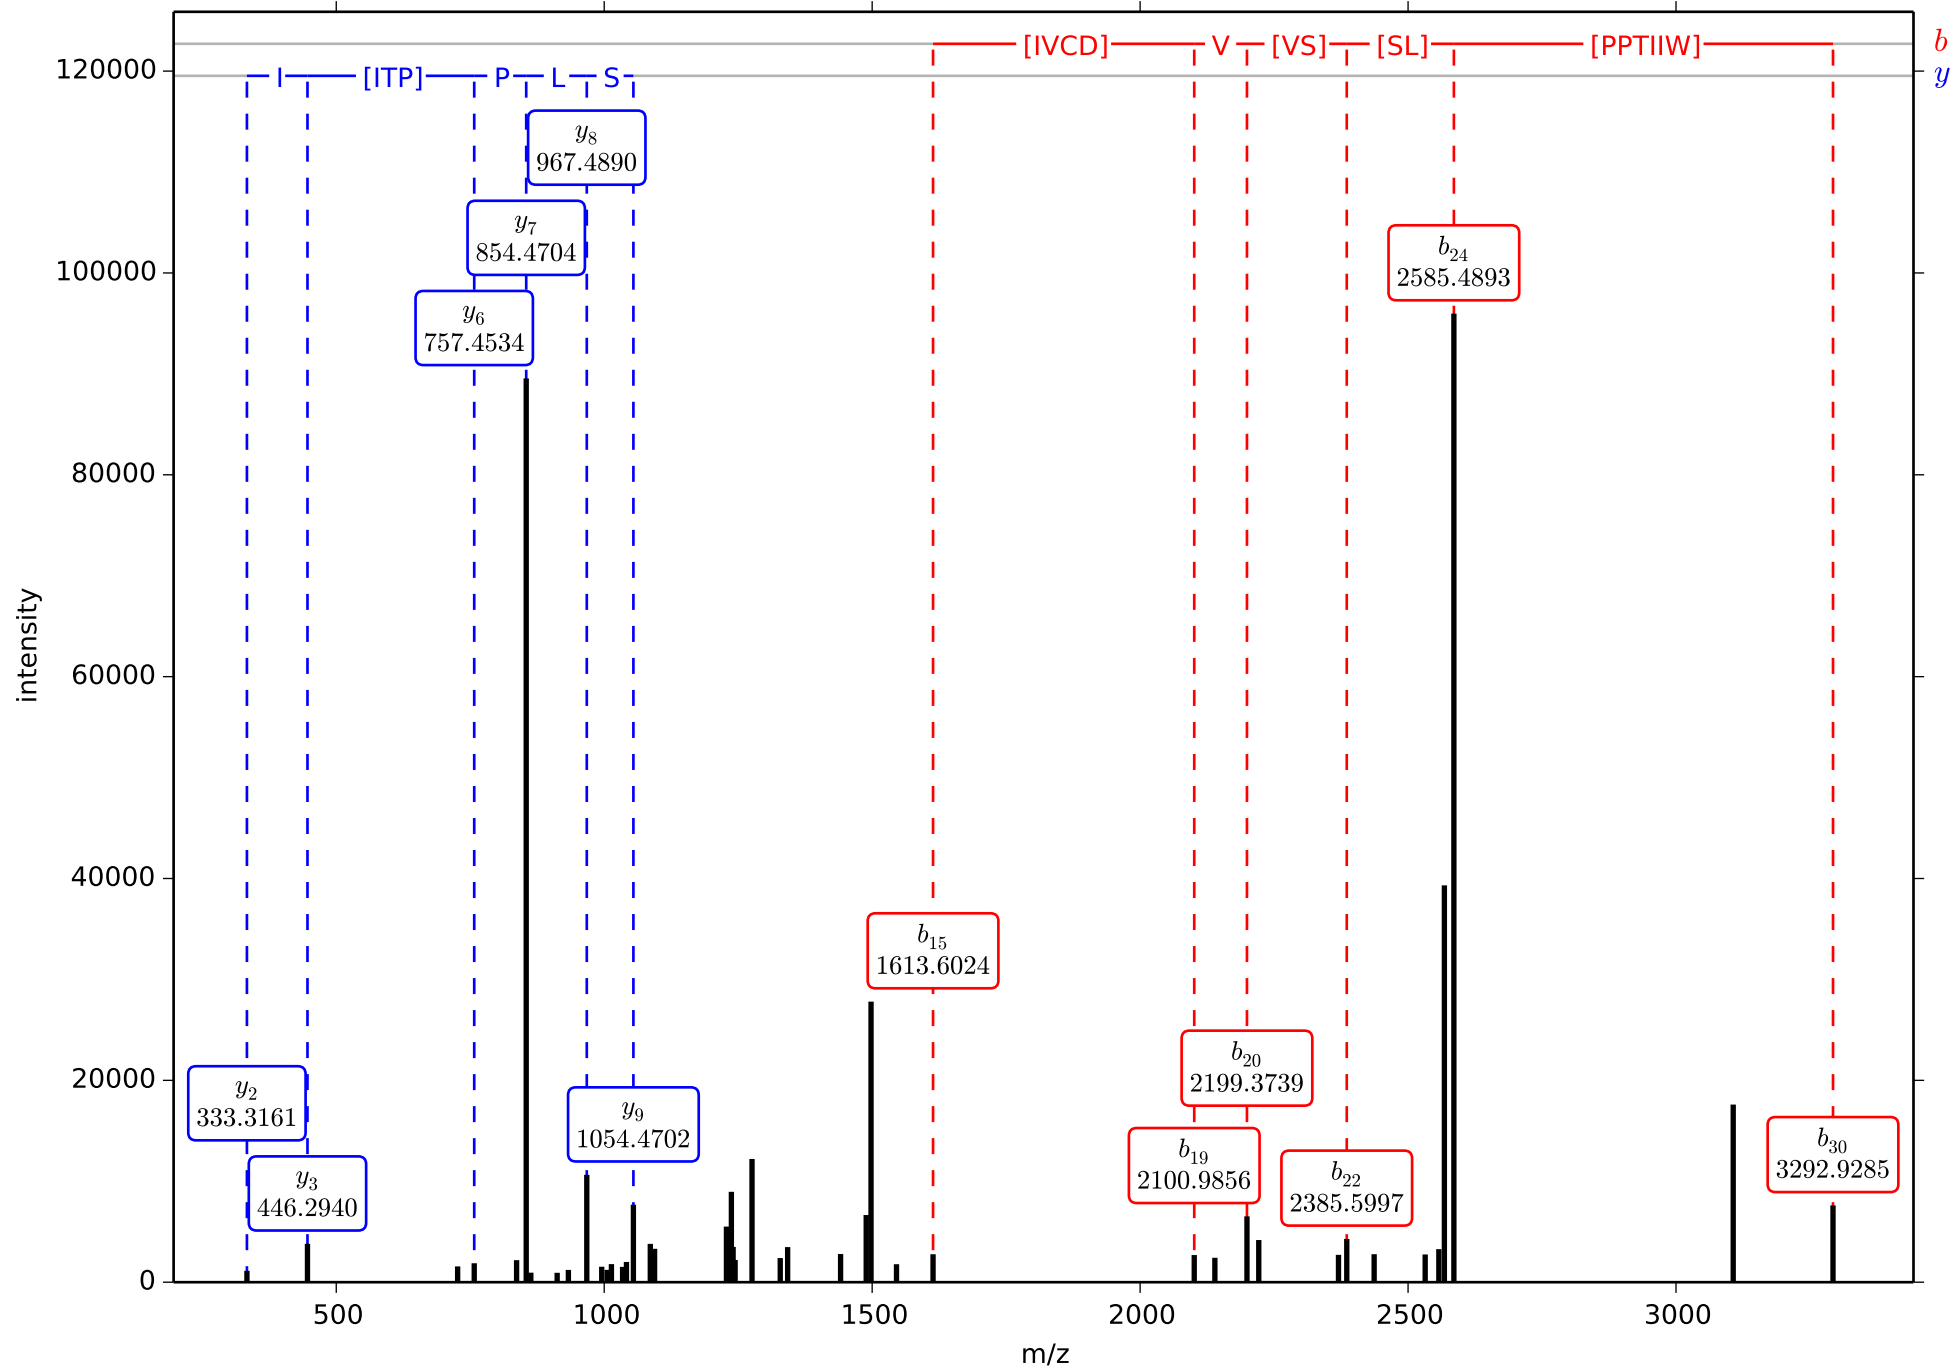

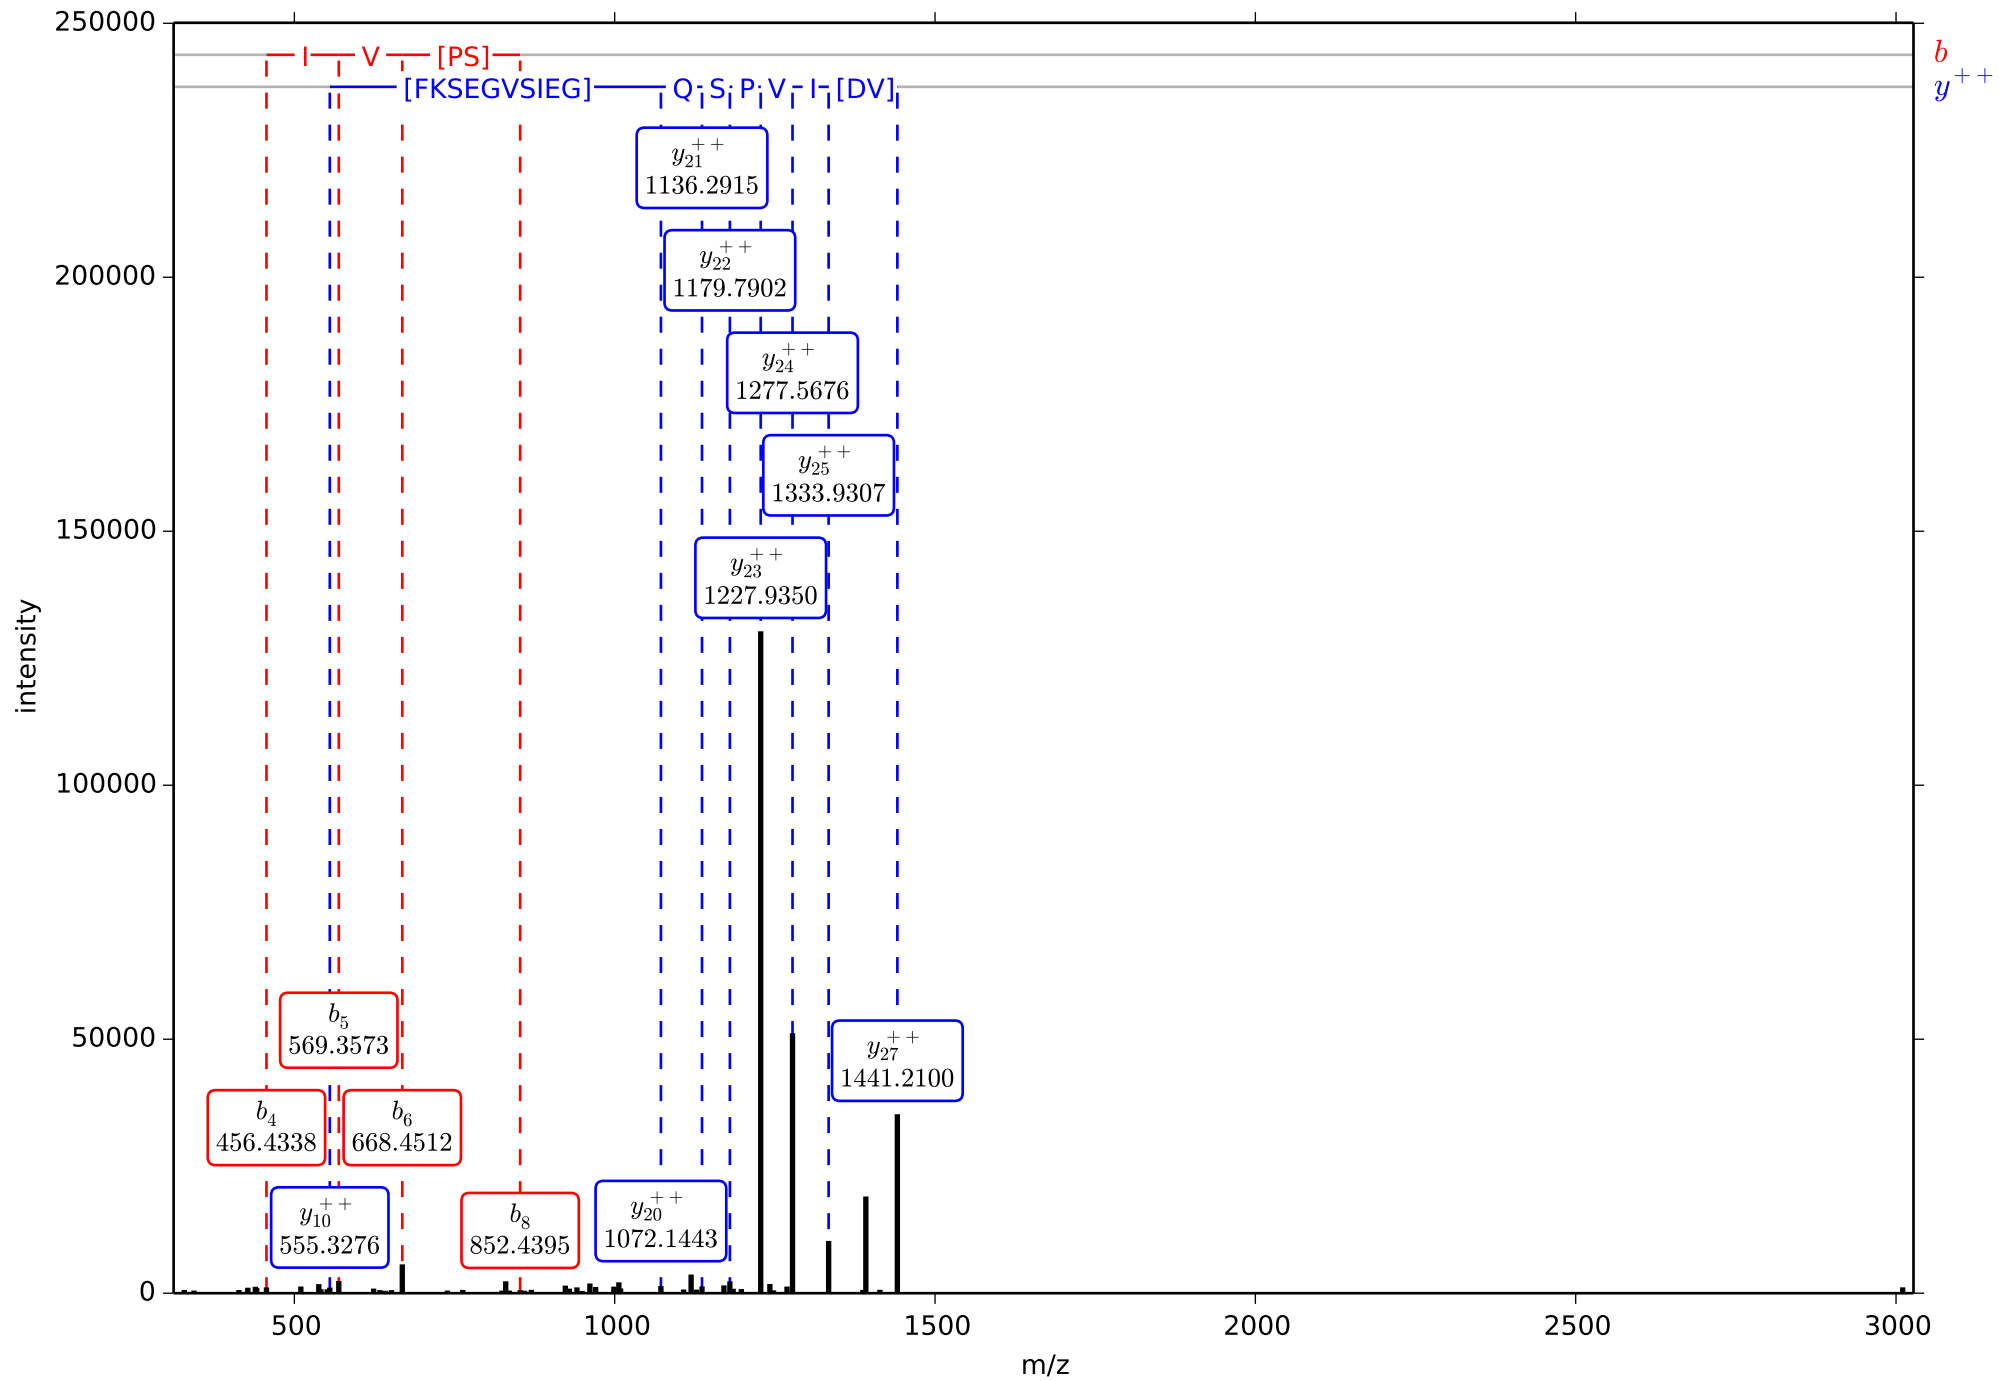



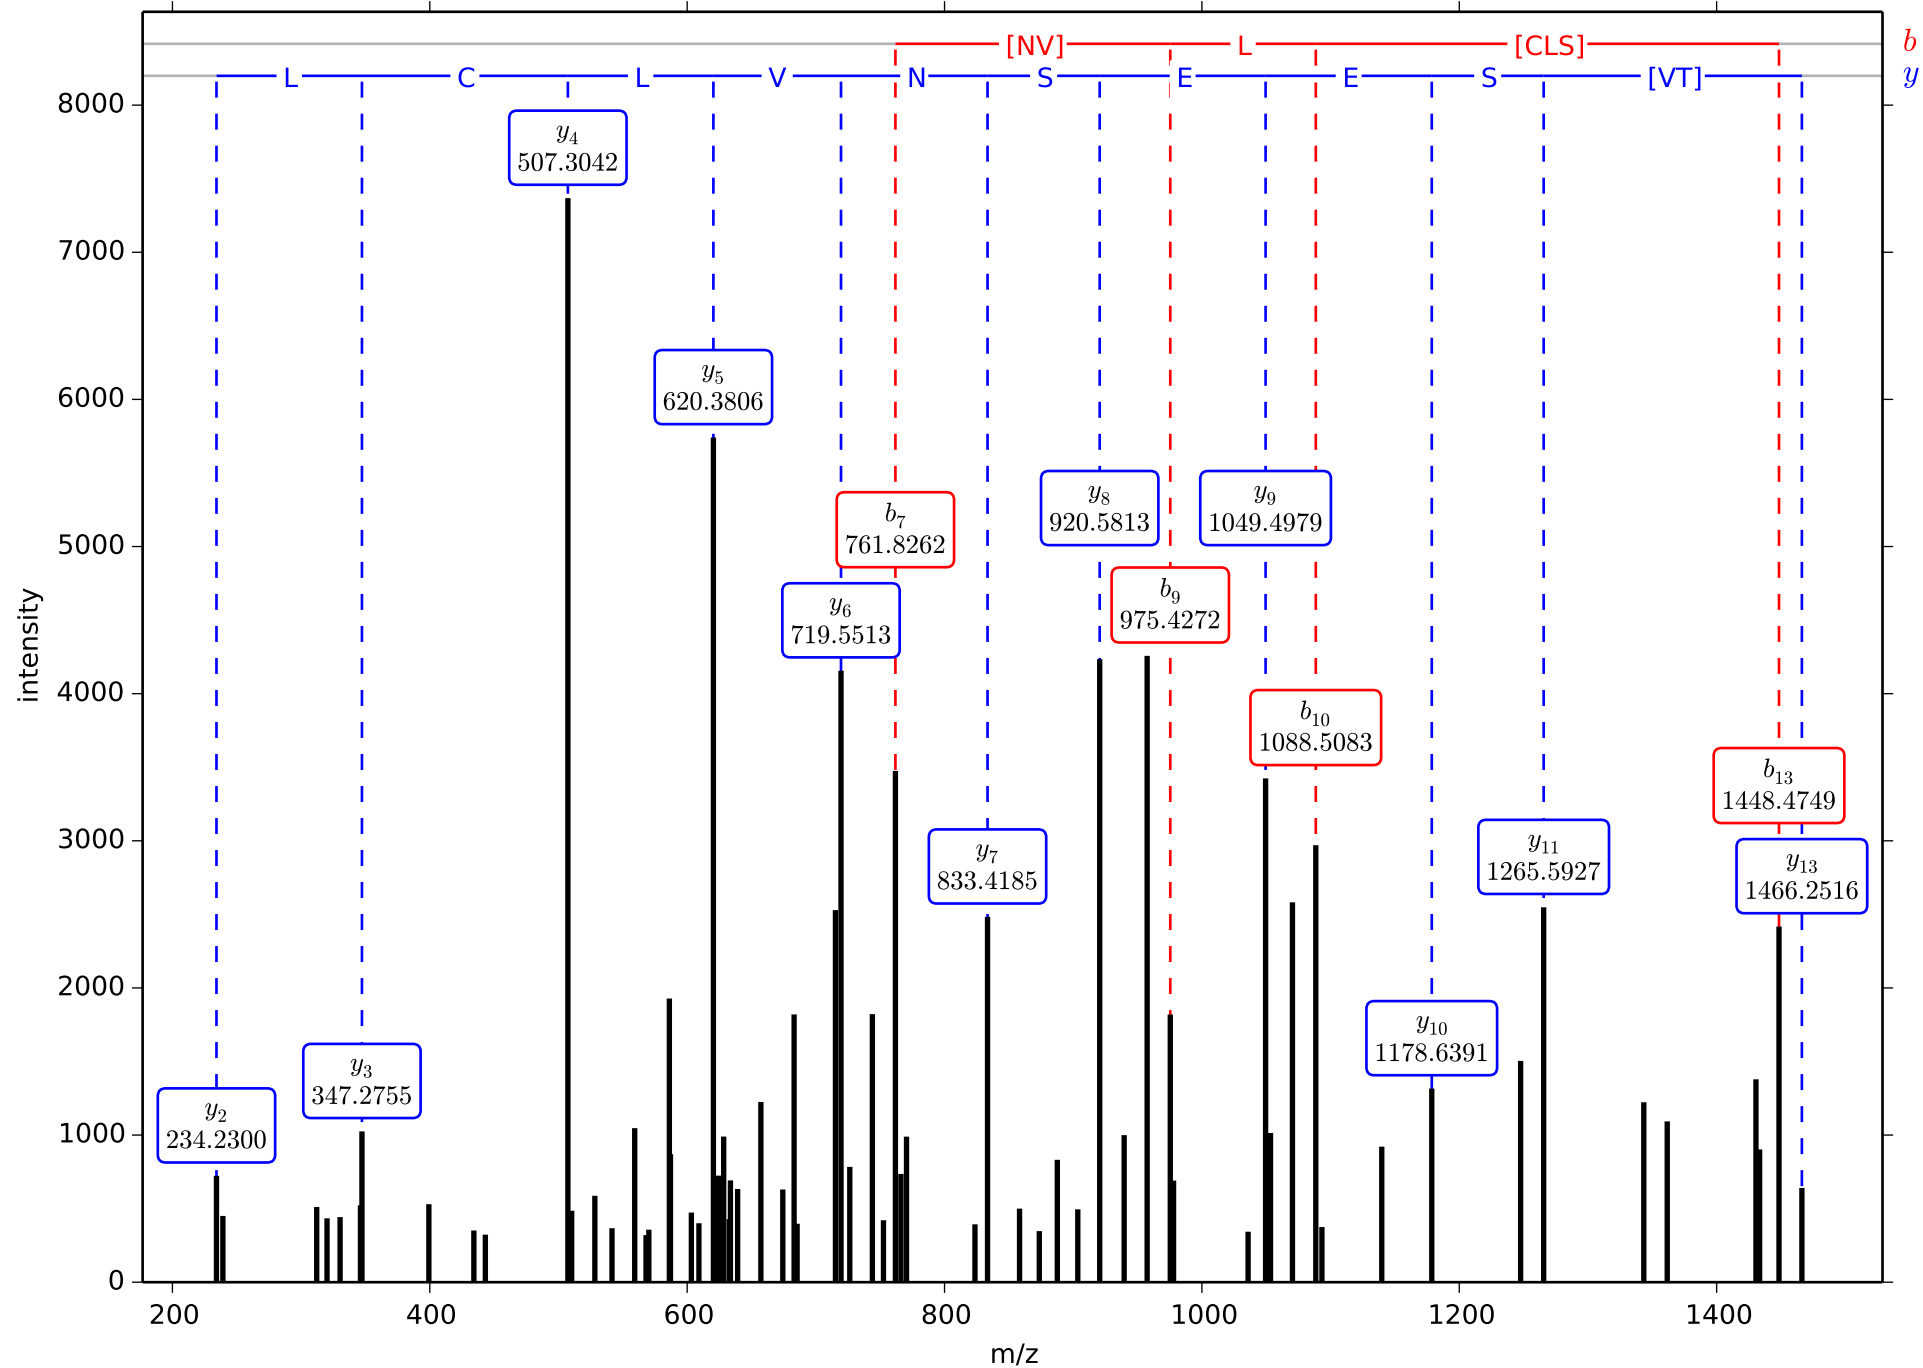

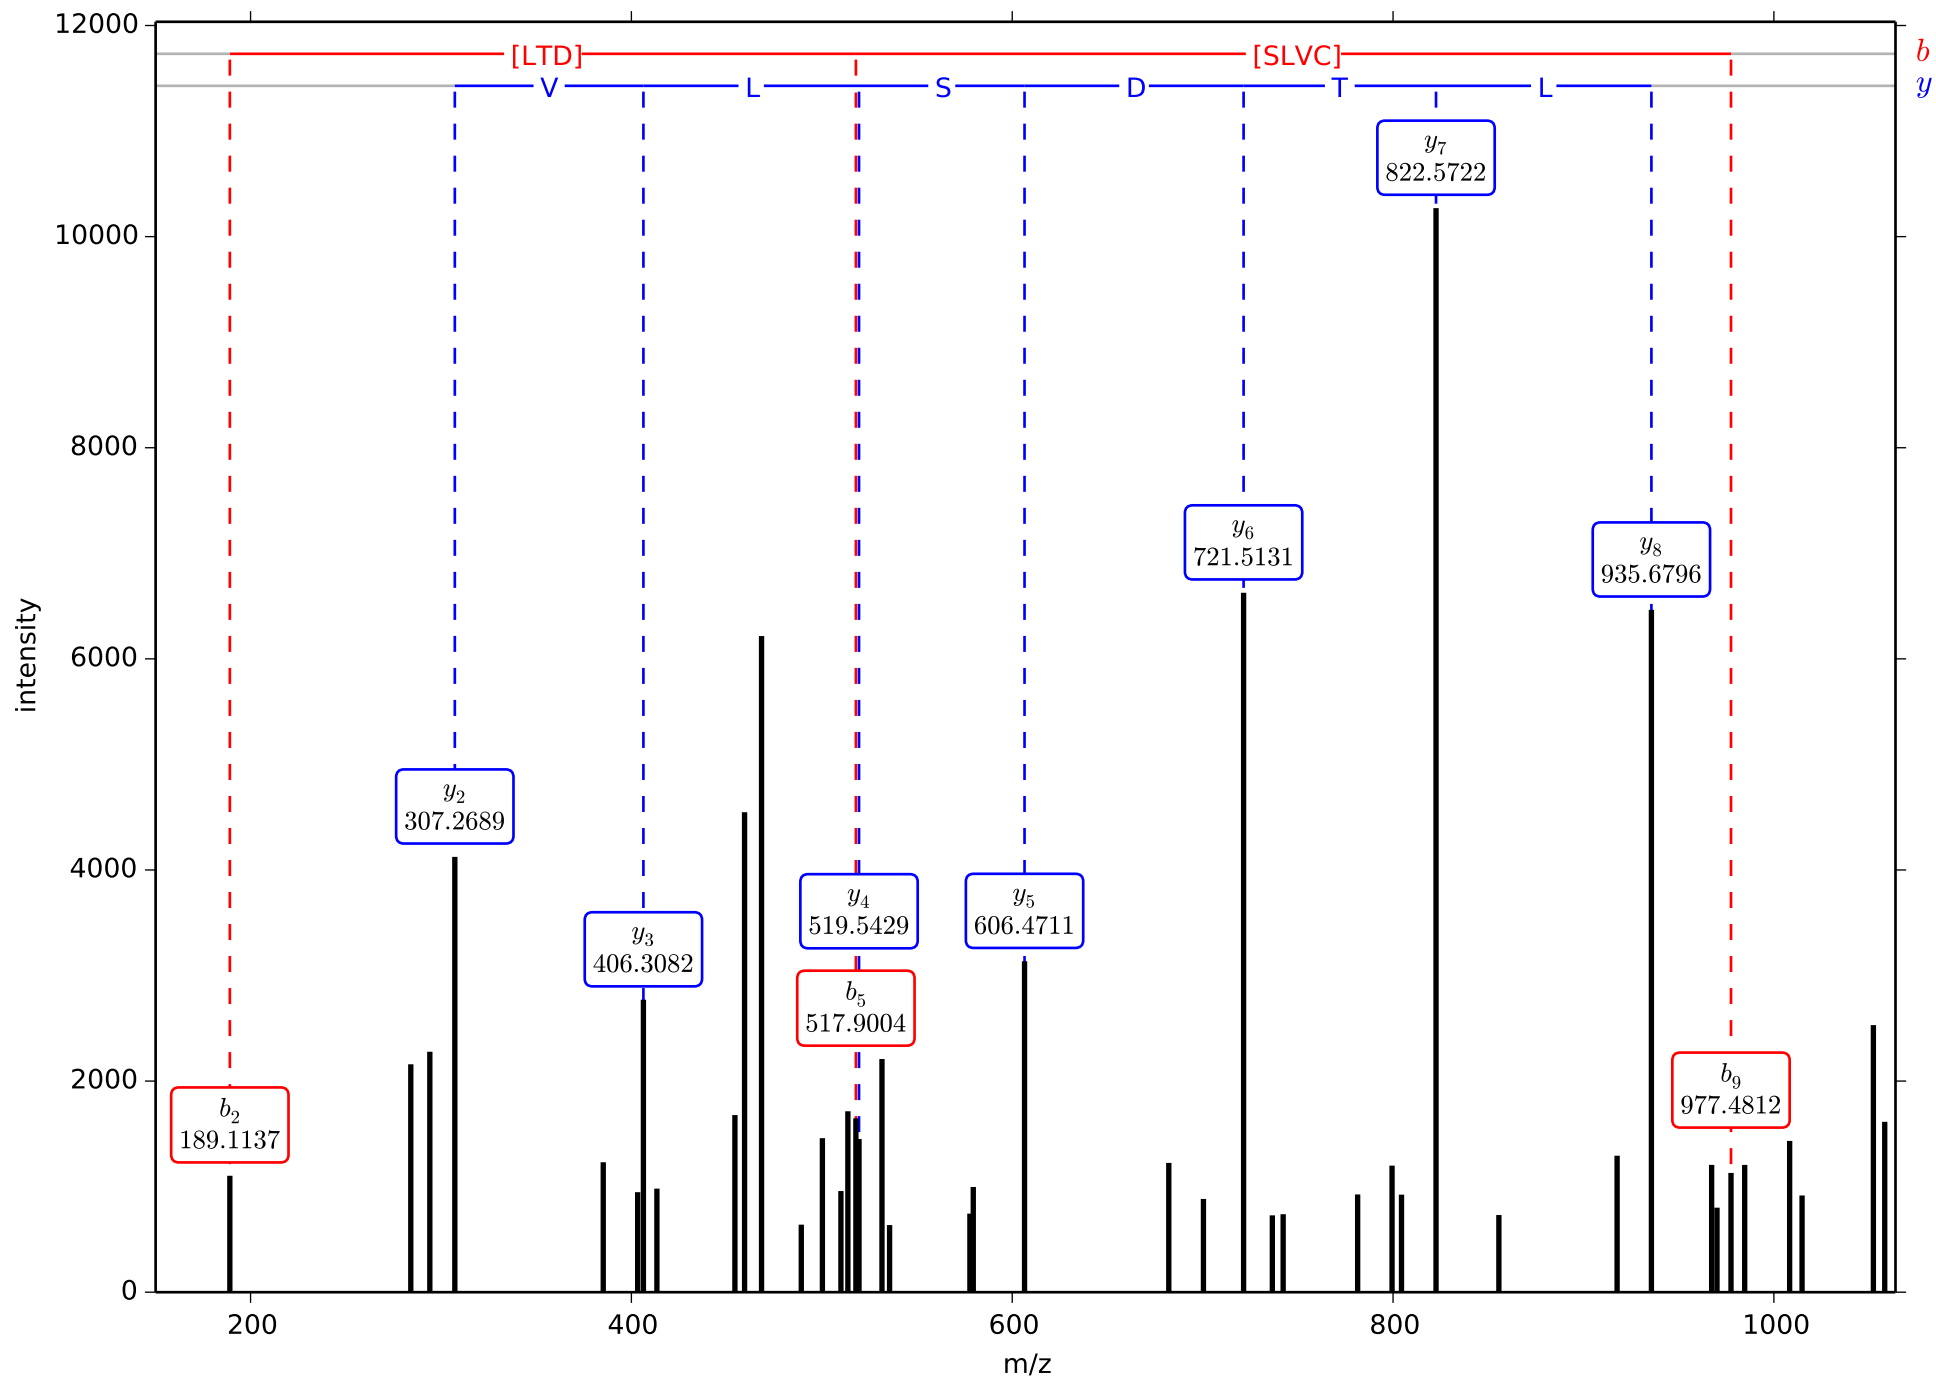

O55143 : VGEATETALTCLVEK

parent: 810.914900,2+

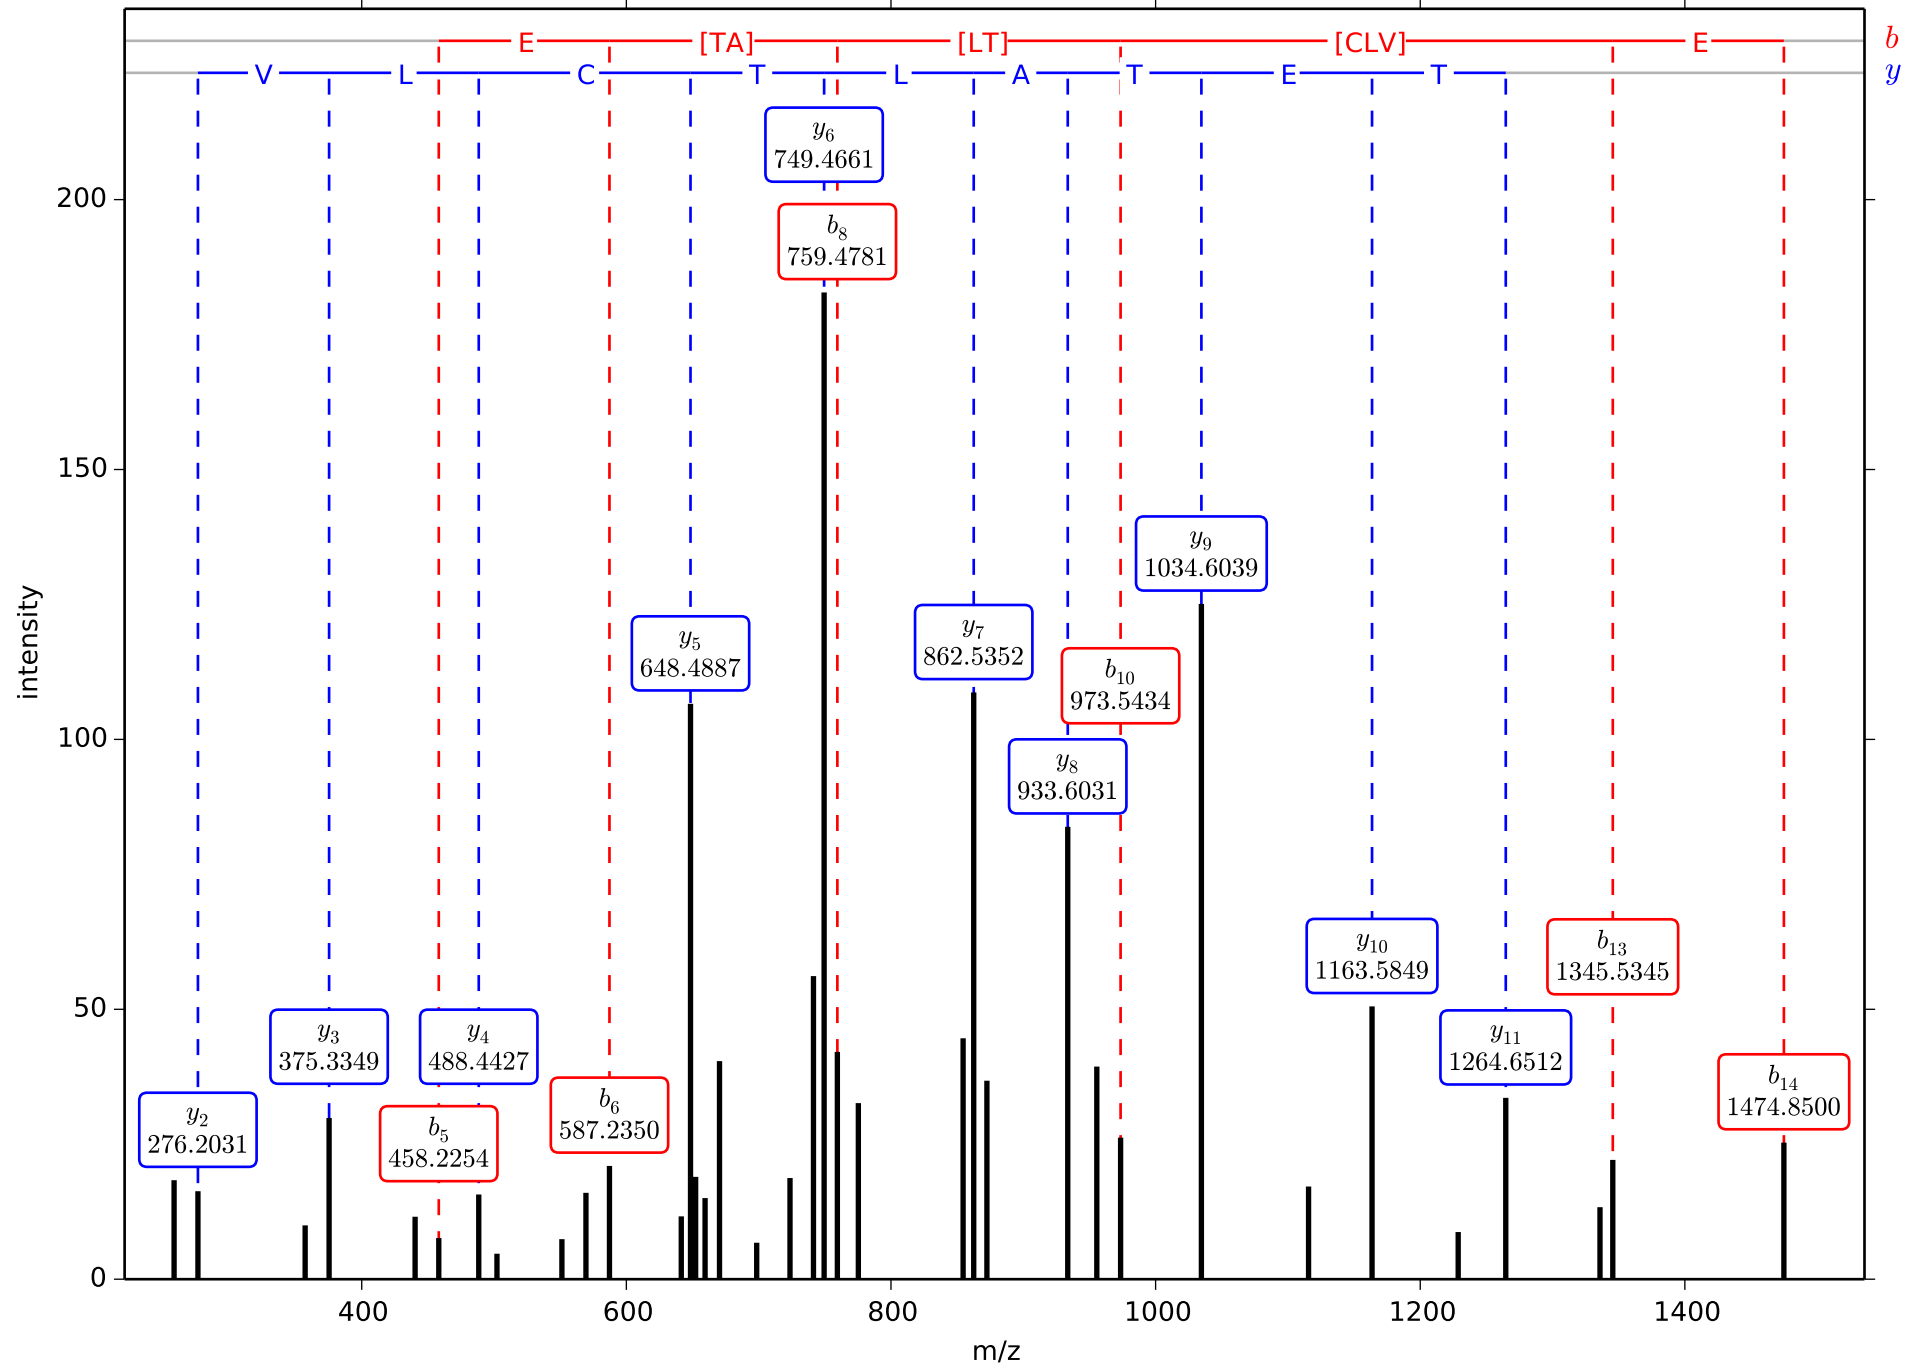

# O55143 : NYLEQPGKECVQPATK

parent: 931.470470,2+

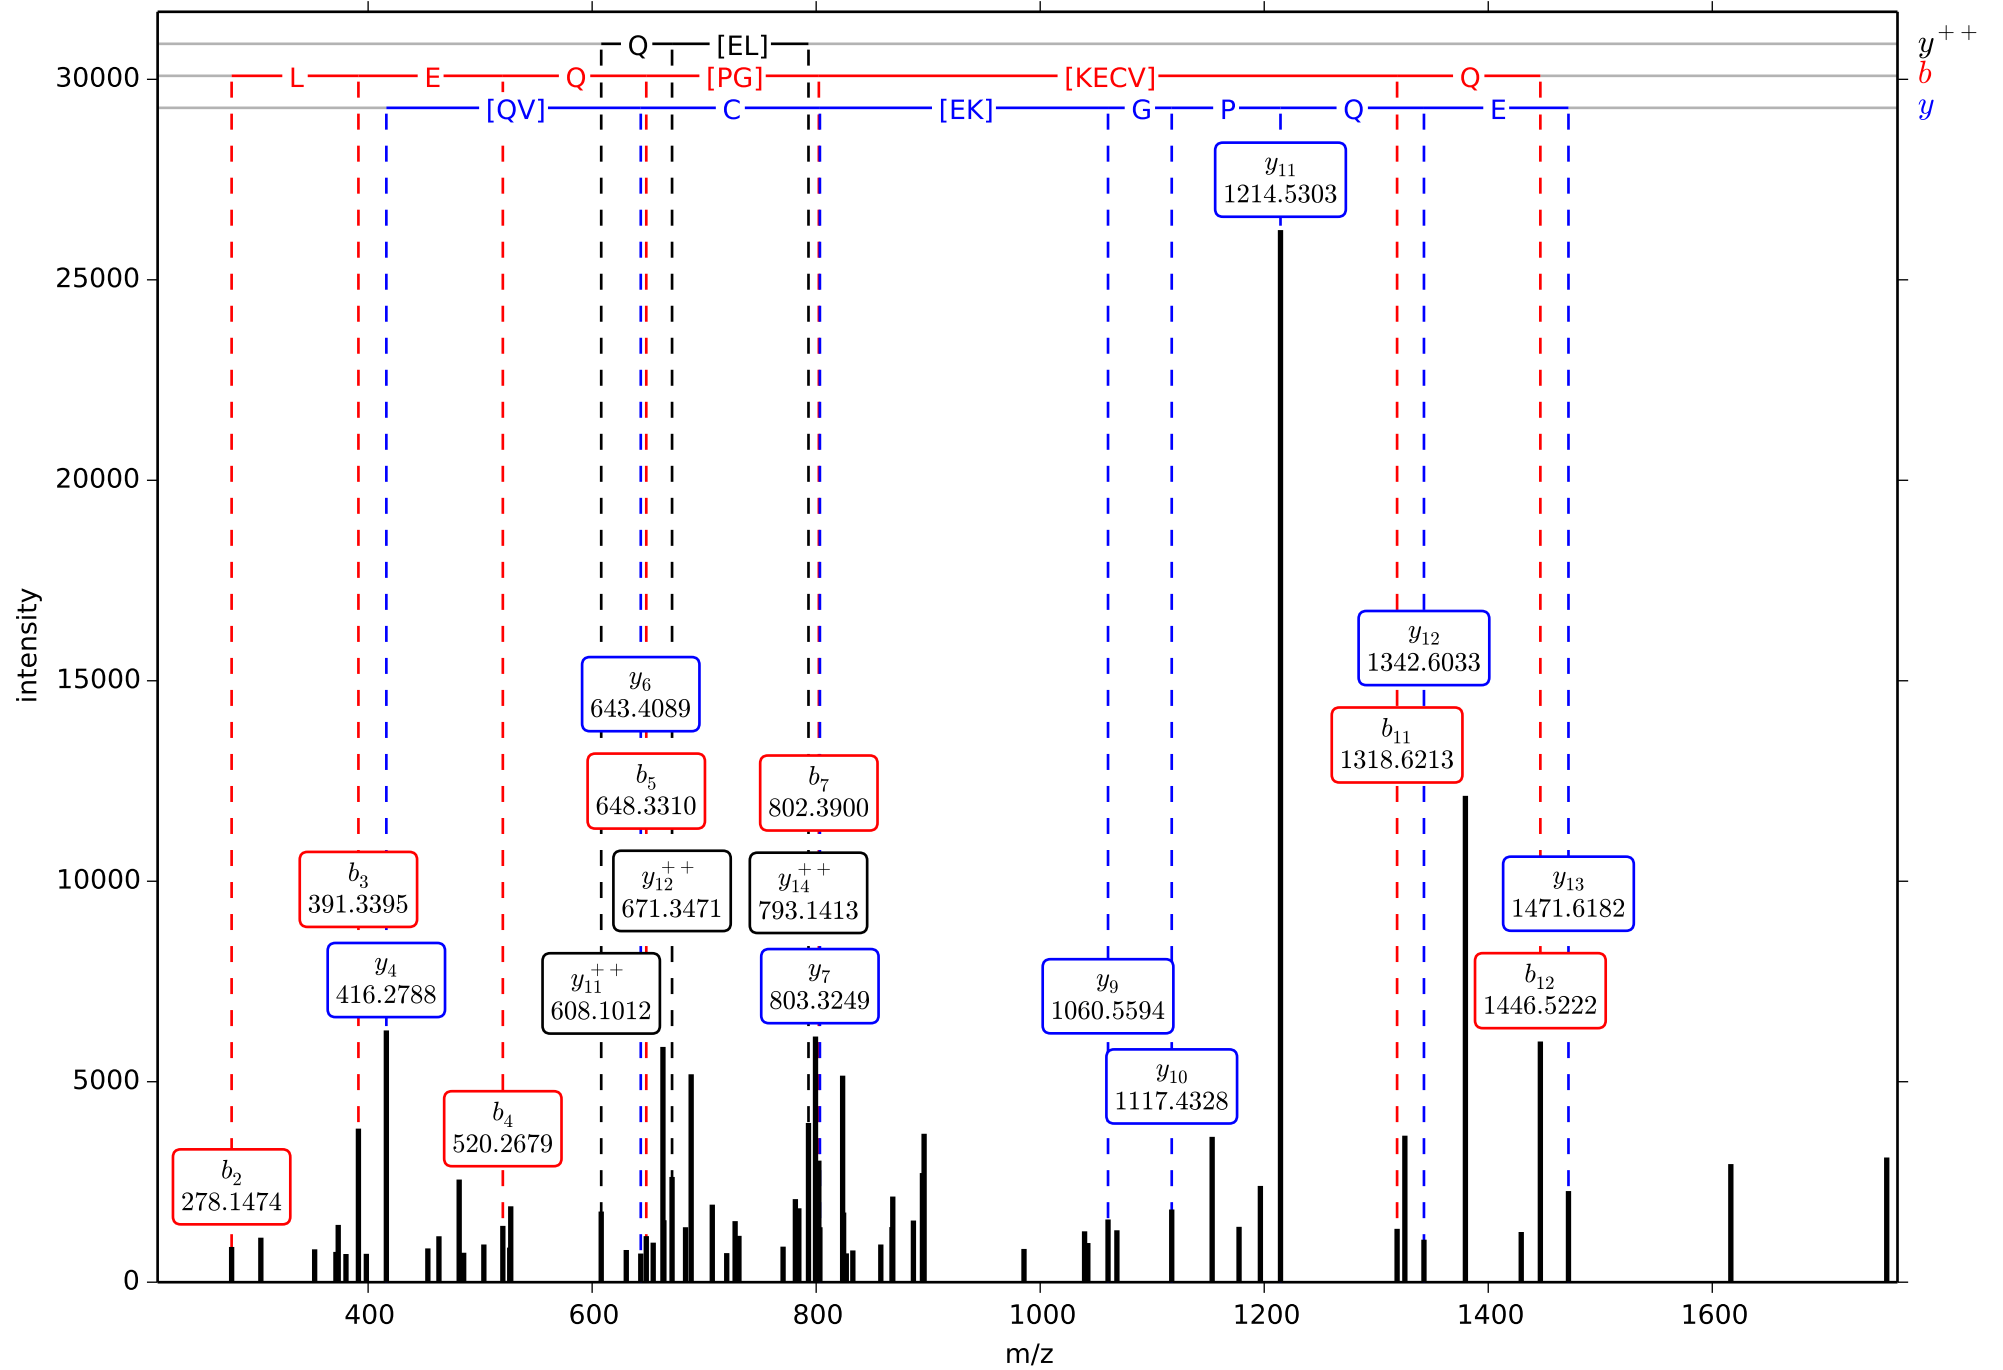

P17710 : CTVSFLLEDGSGK

parent: 750.369450,2+

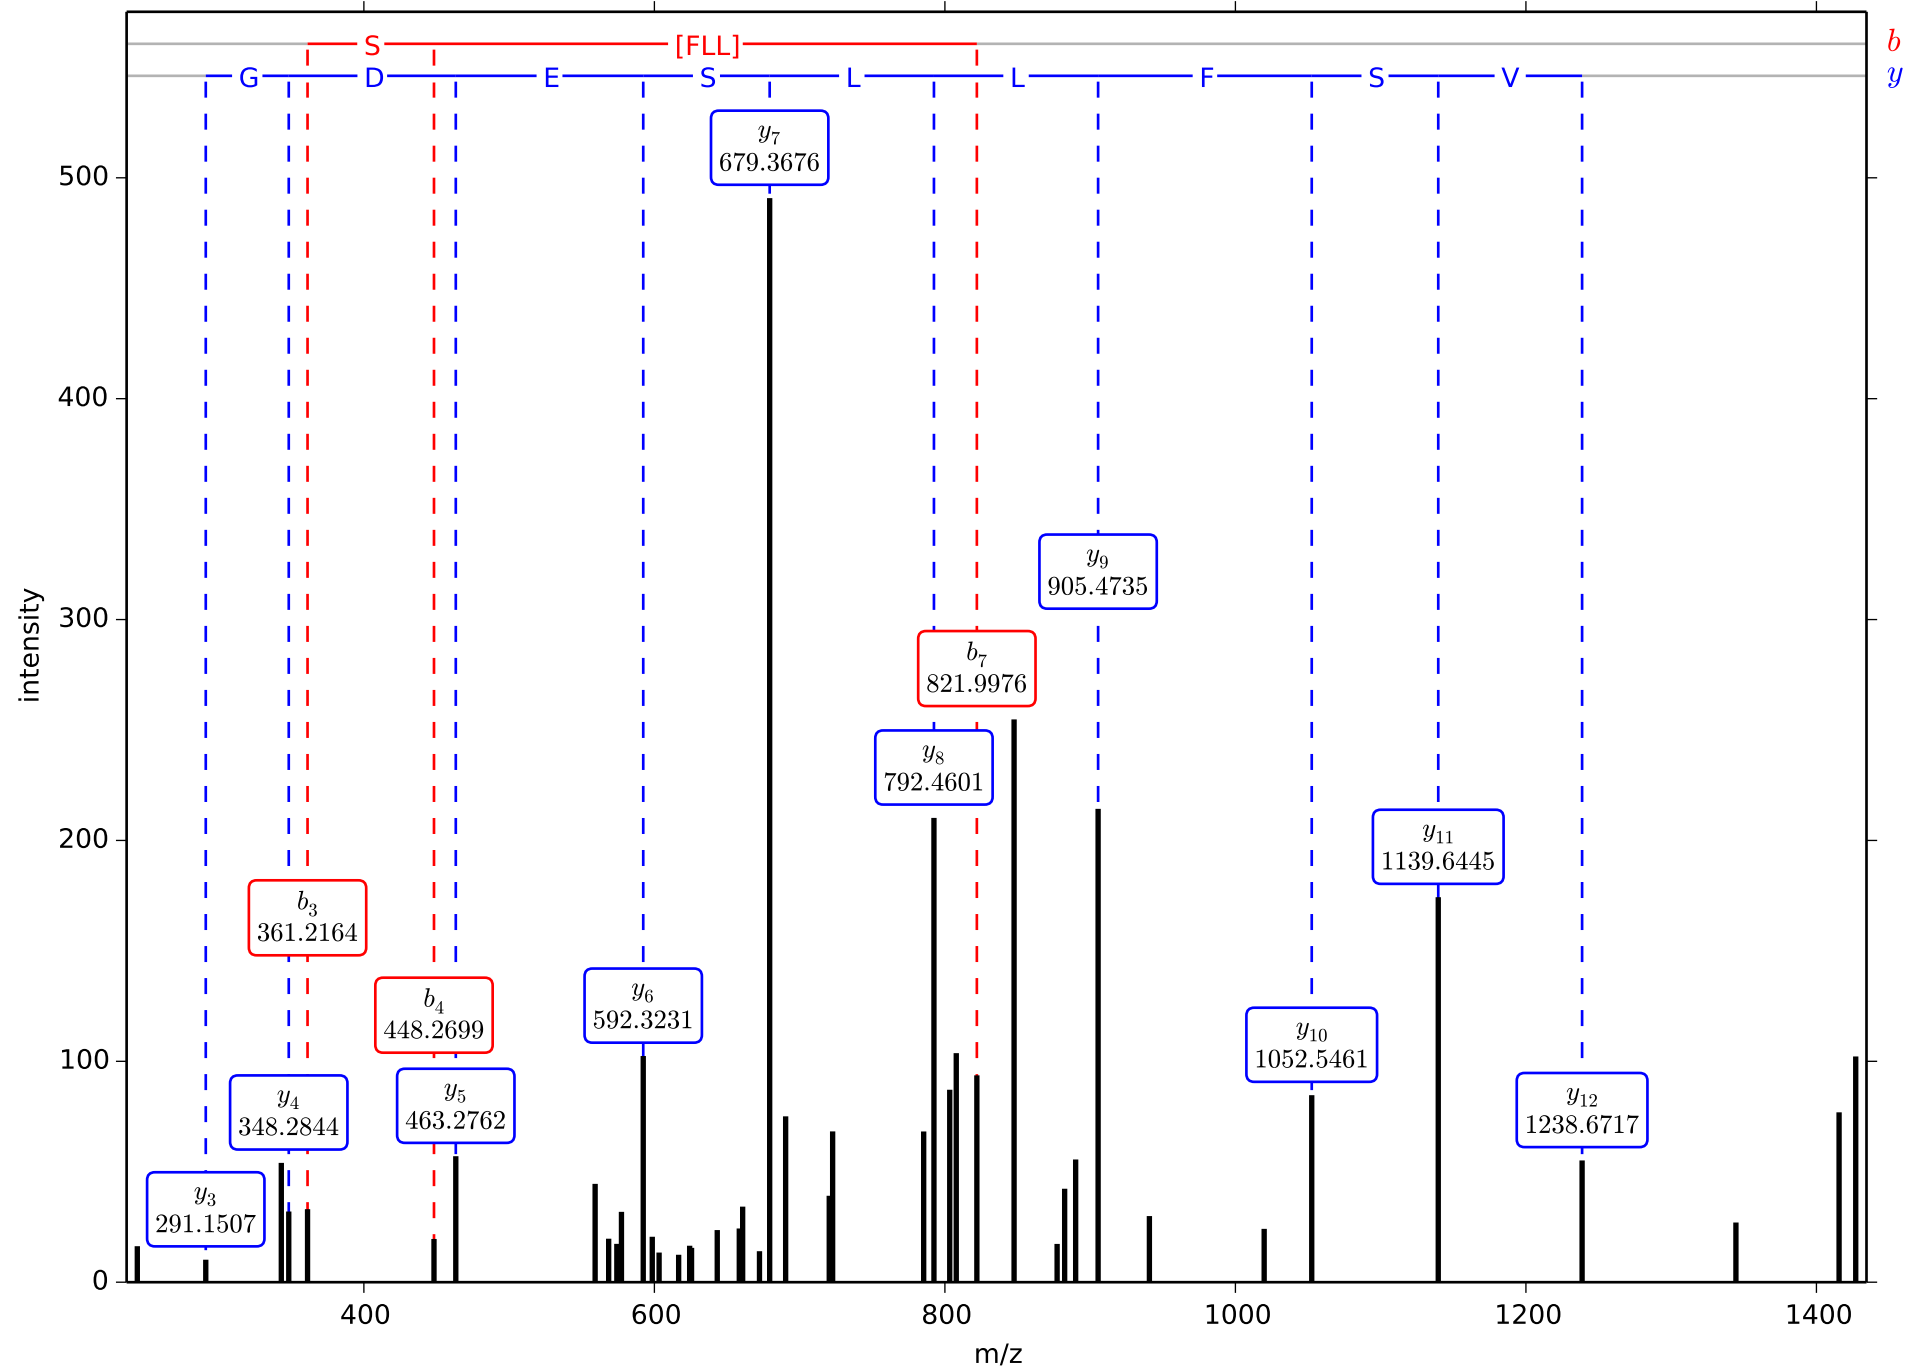

P17710 : QTSLDCGILITWTK

parent: 818.420970,2+

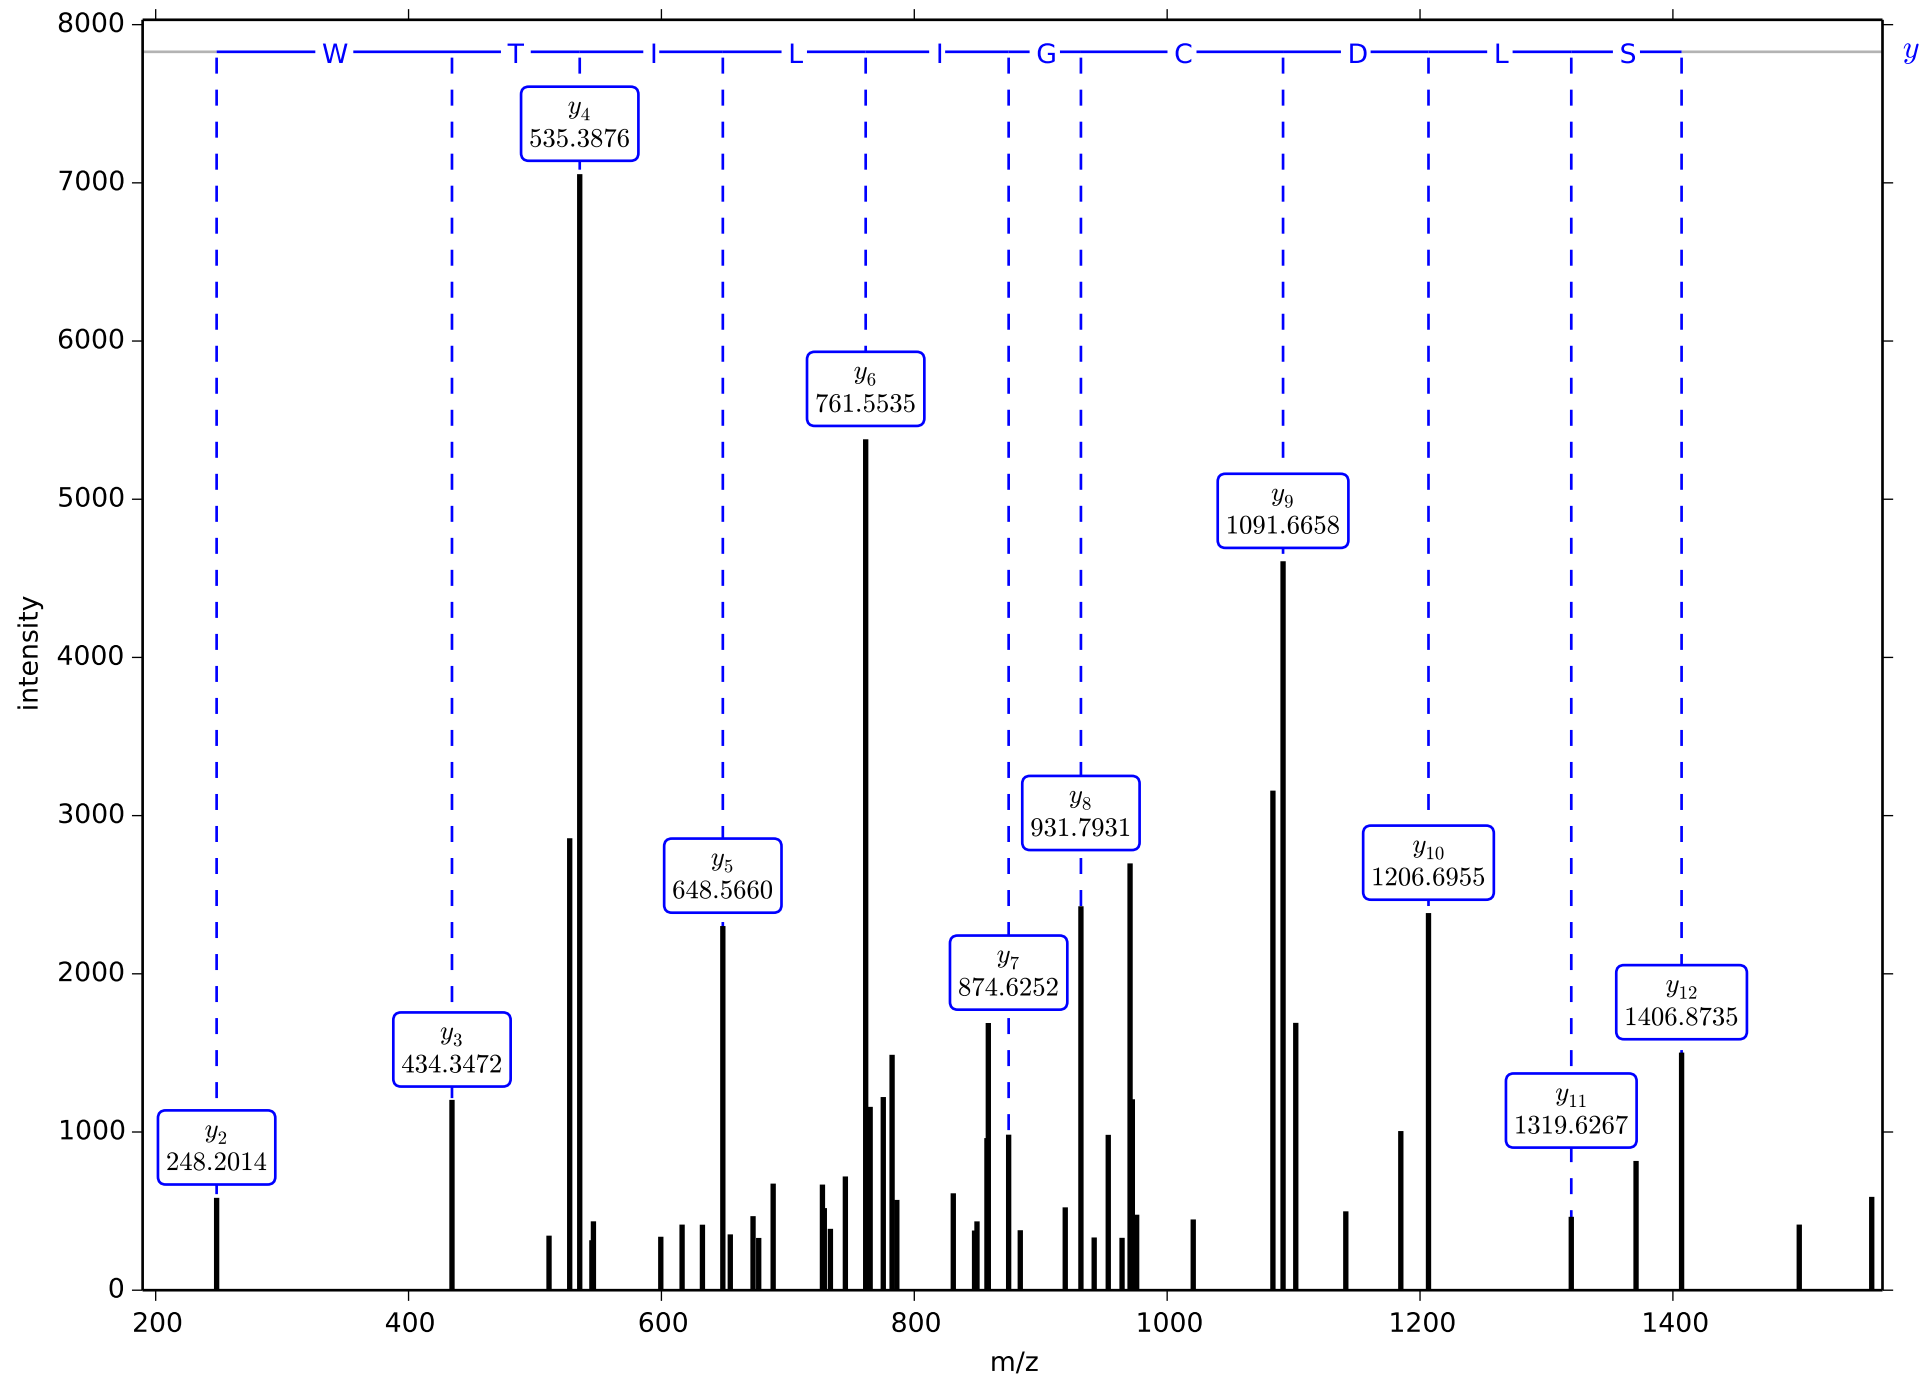

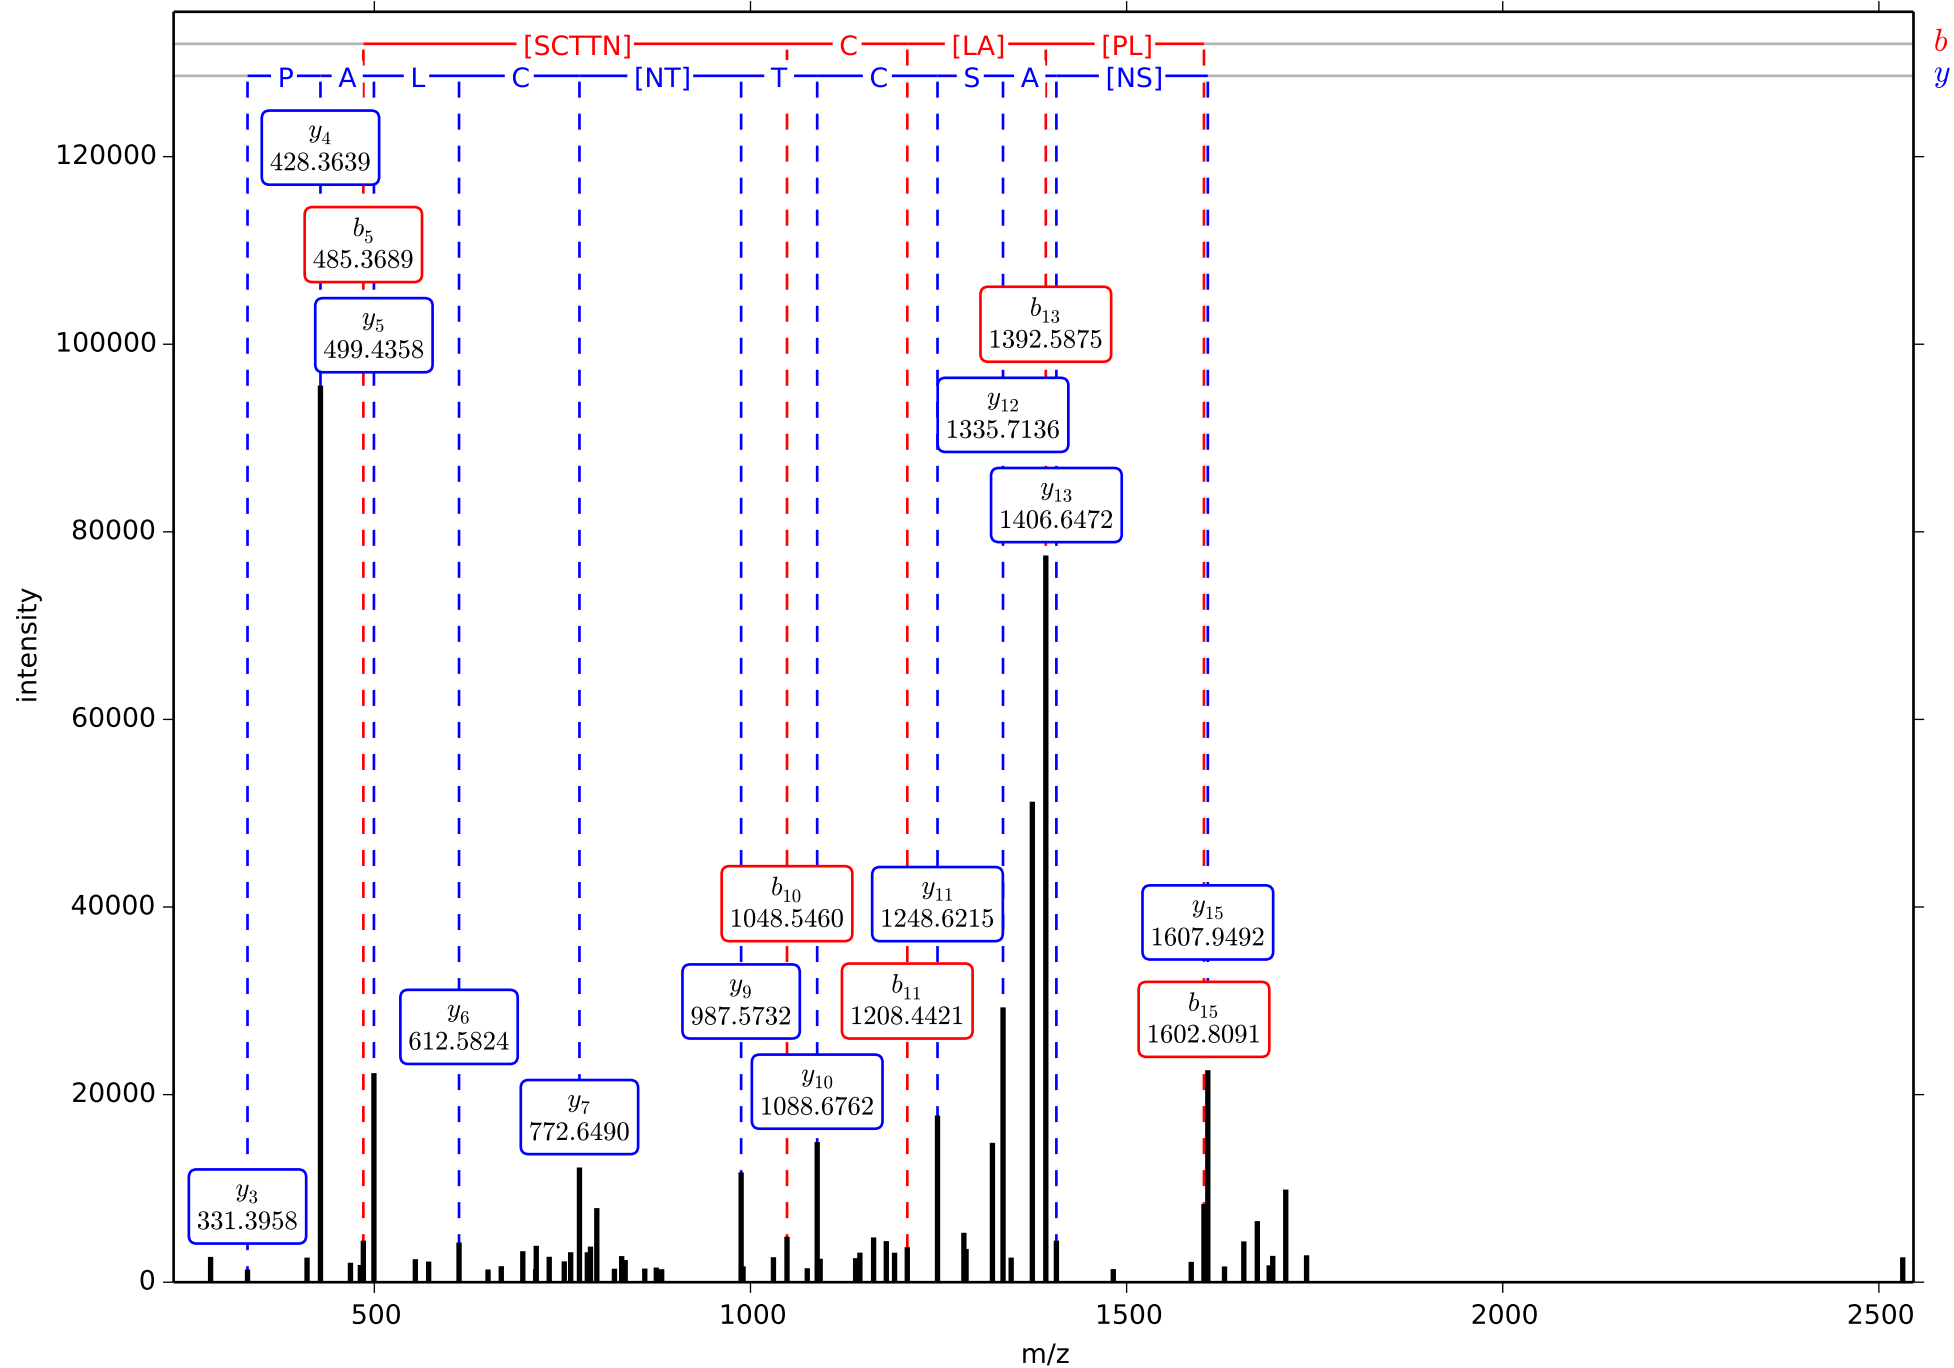

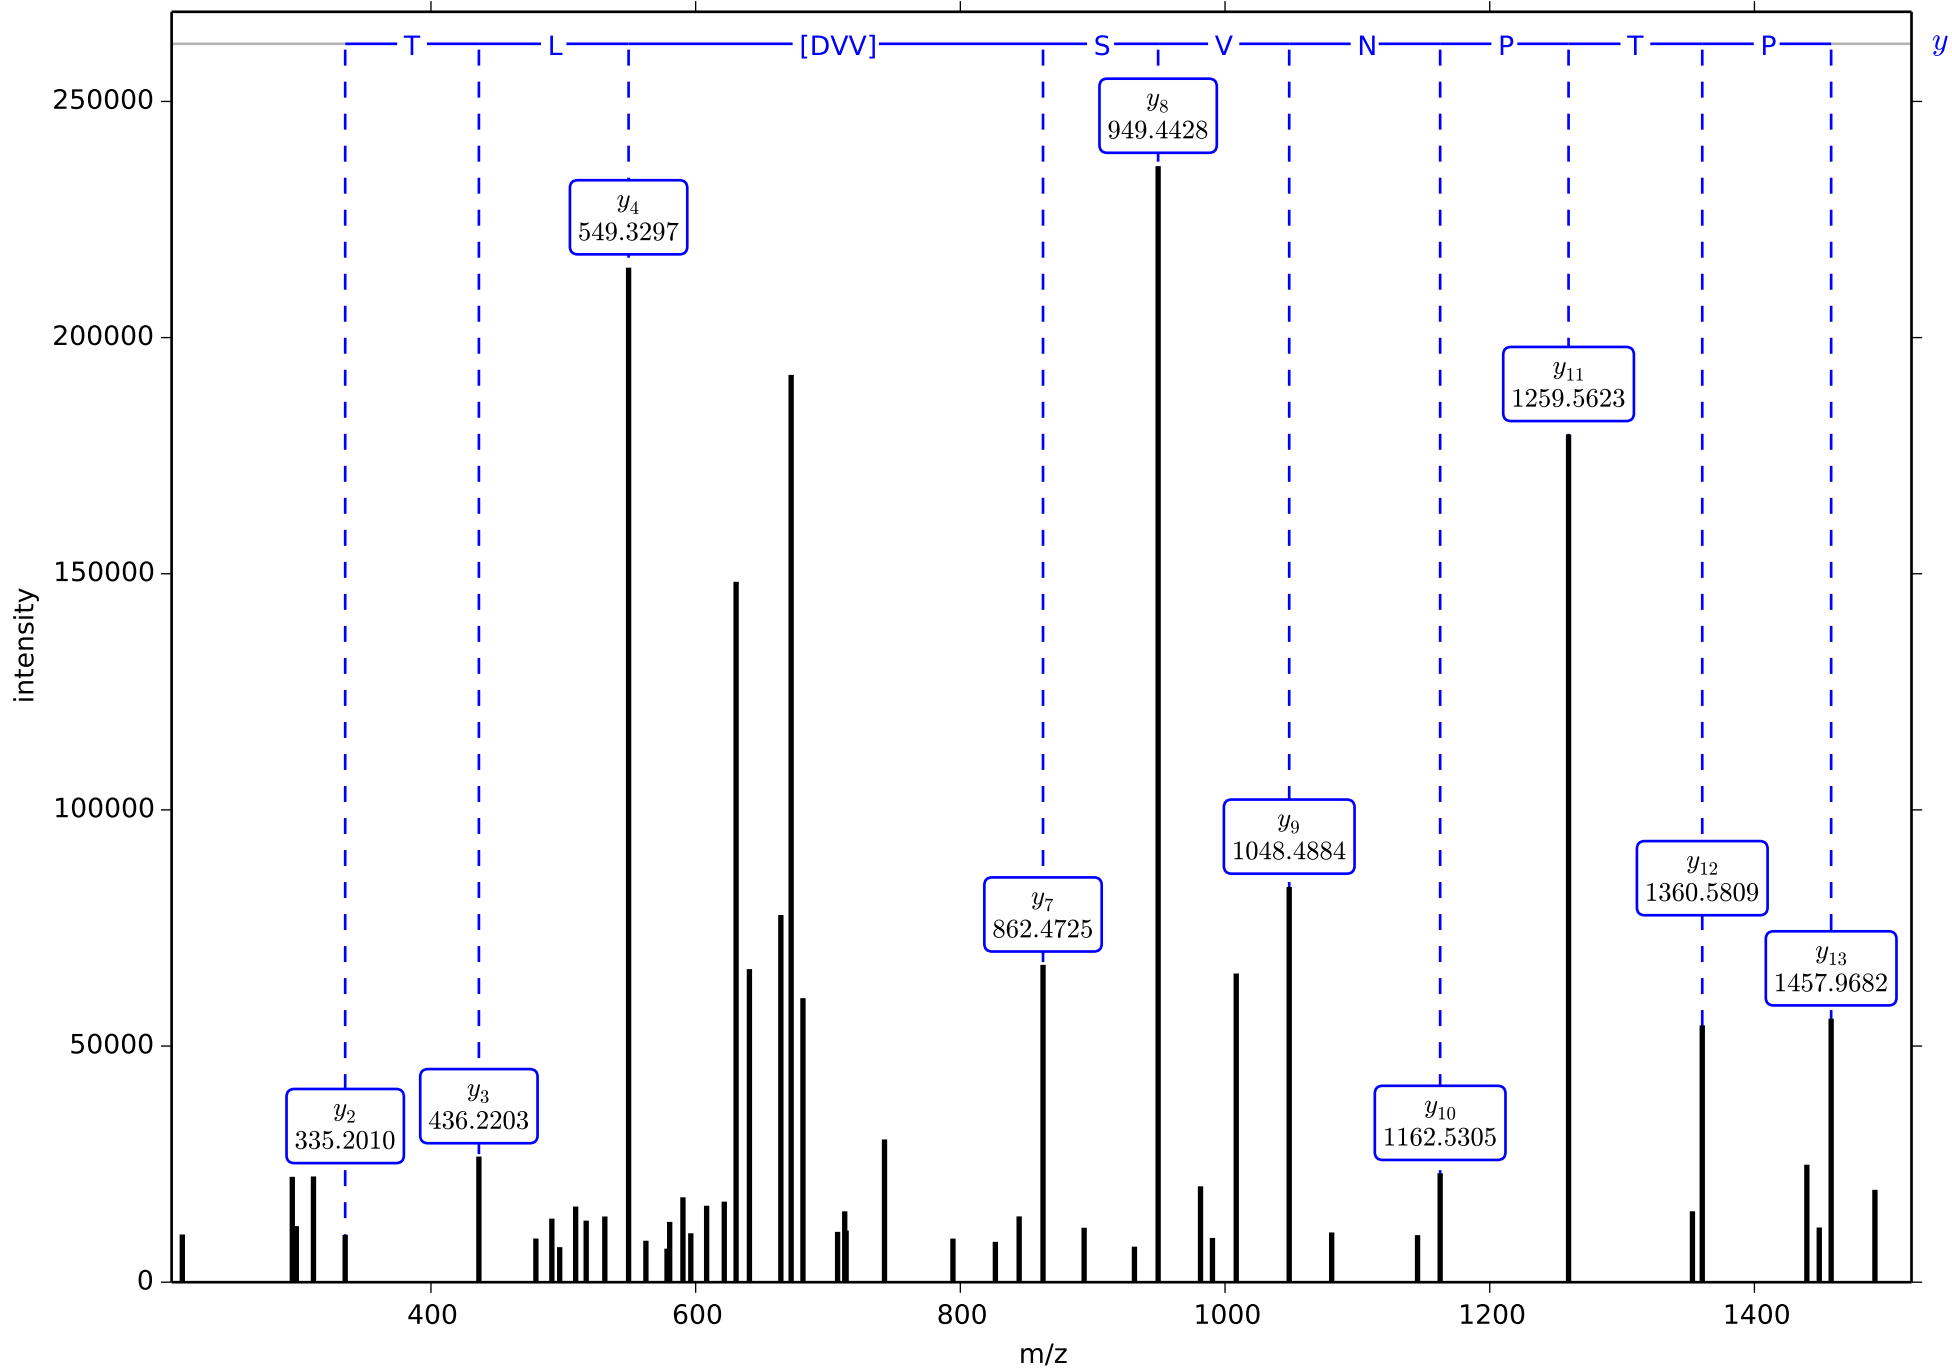



# Q9WUM5 : LIGPNCPGVINPGECK

parent: 862.924450,2+

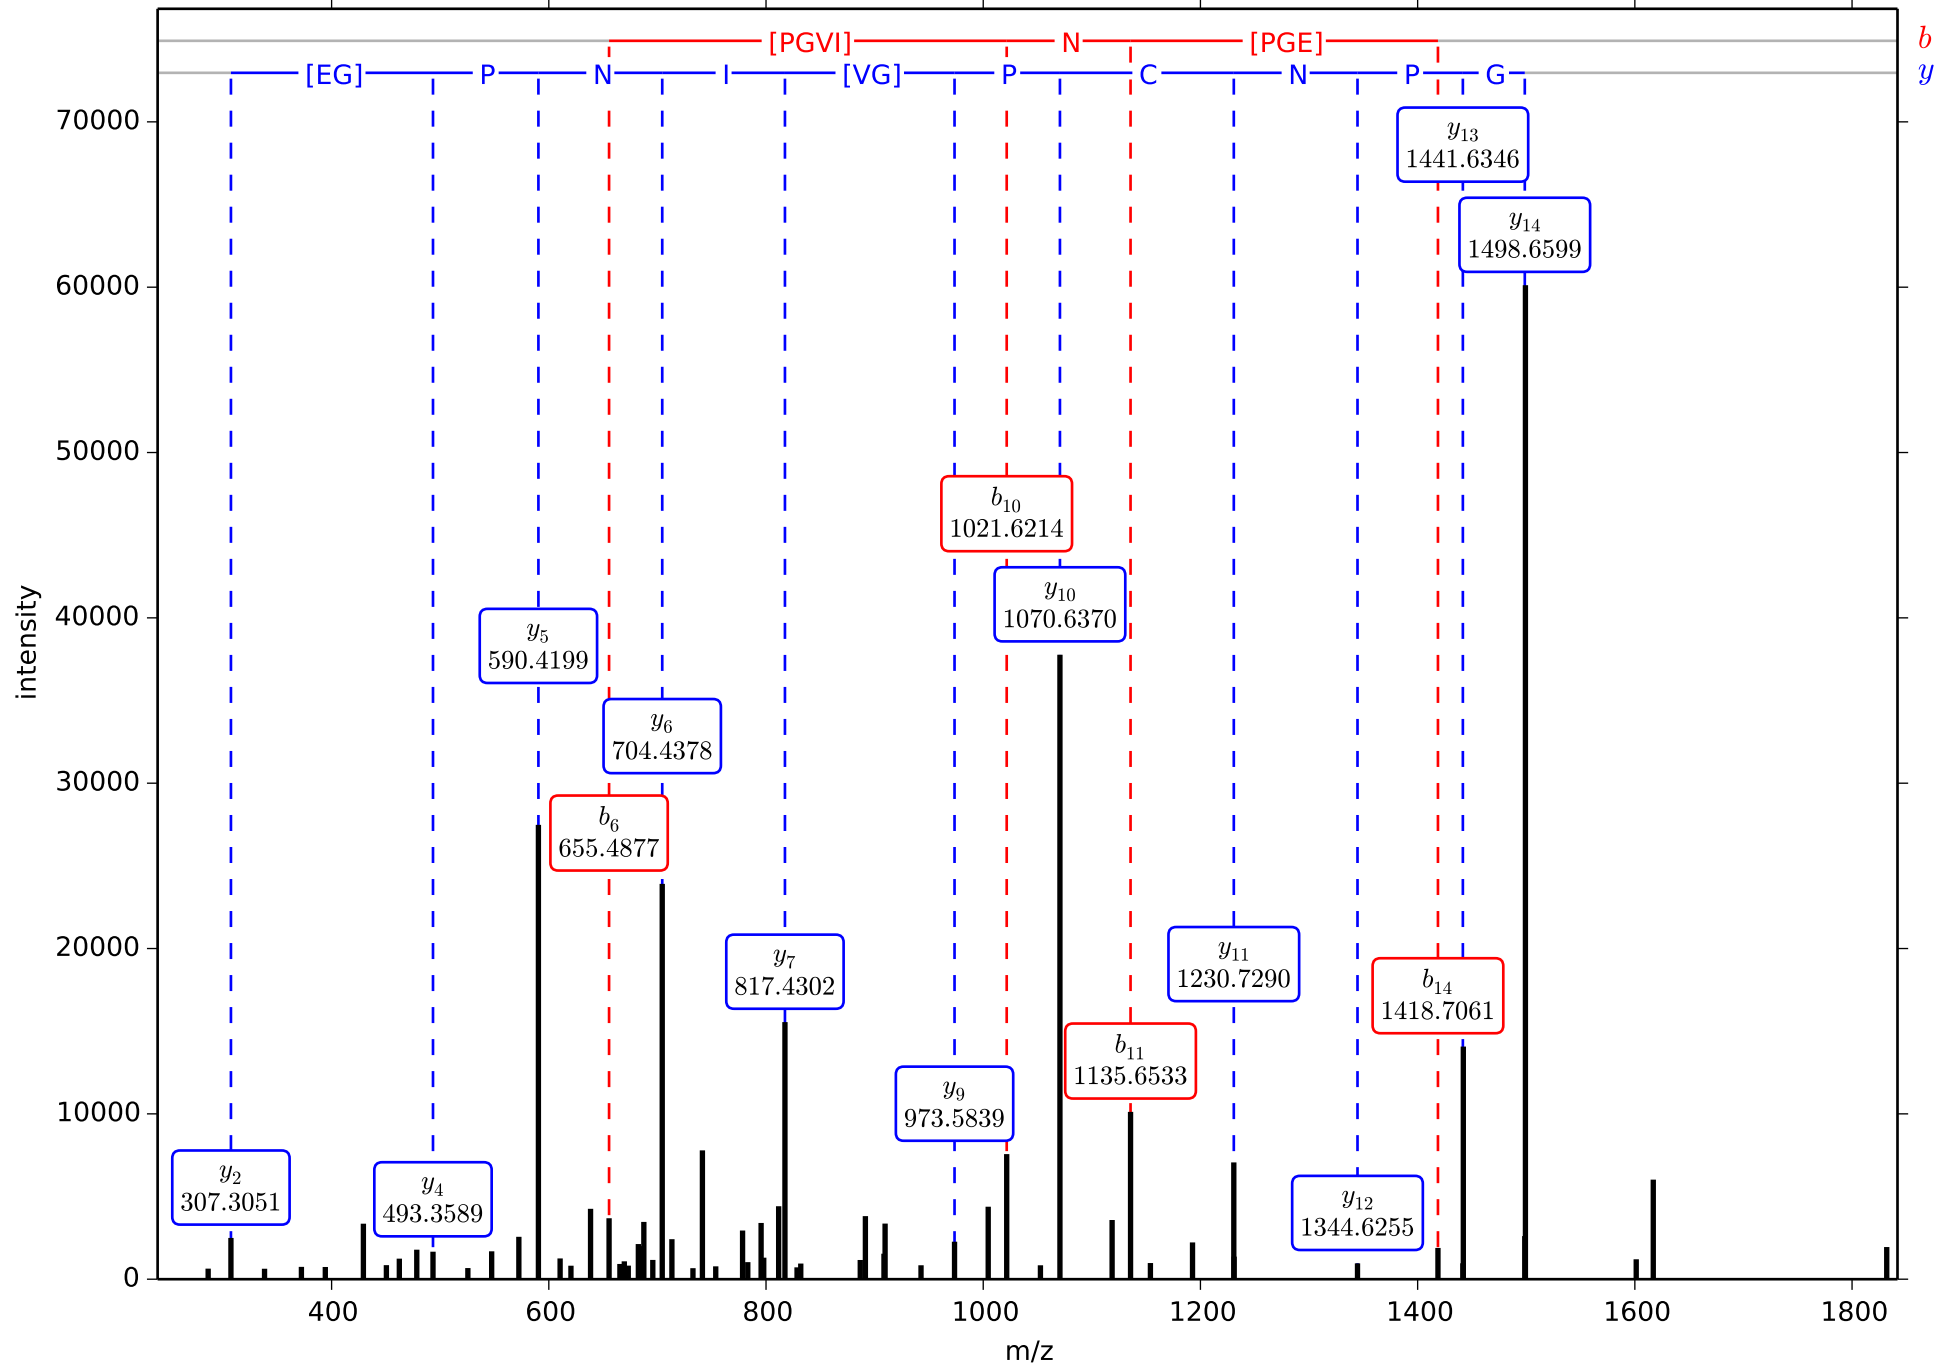

Q9WUM5 : IICQGFTGK

parent: 512.274540,2+

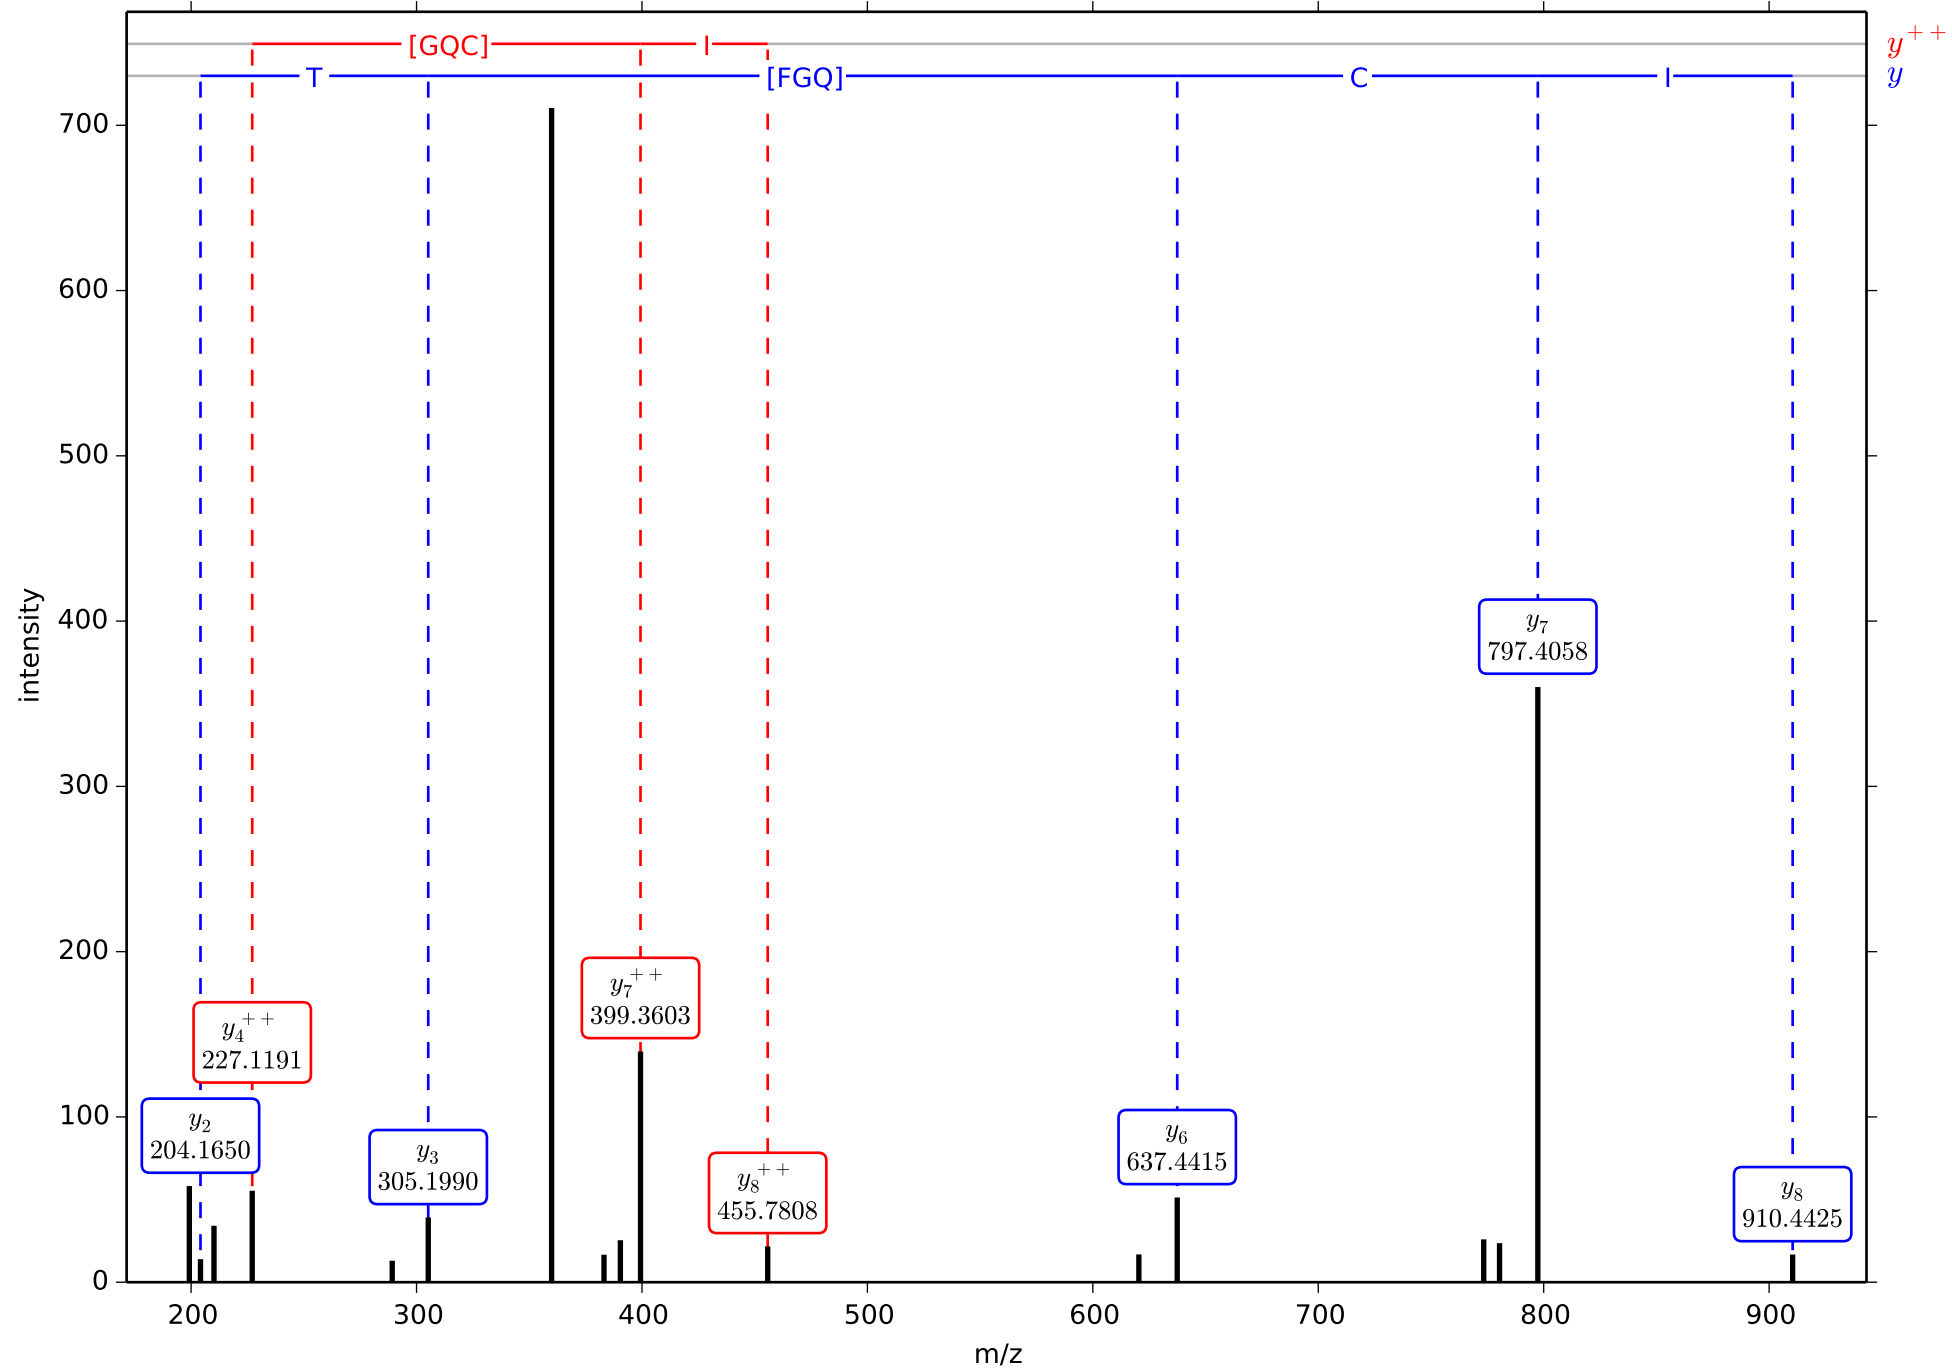

Q9Z2I9 : ICNQVLVCER

parent: 645.818060,2+

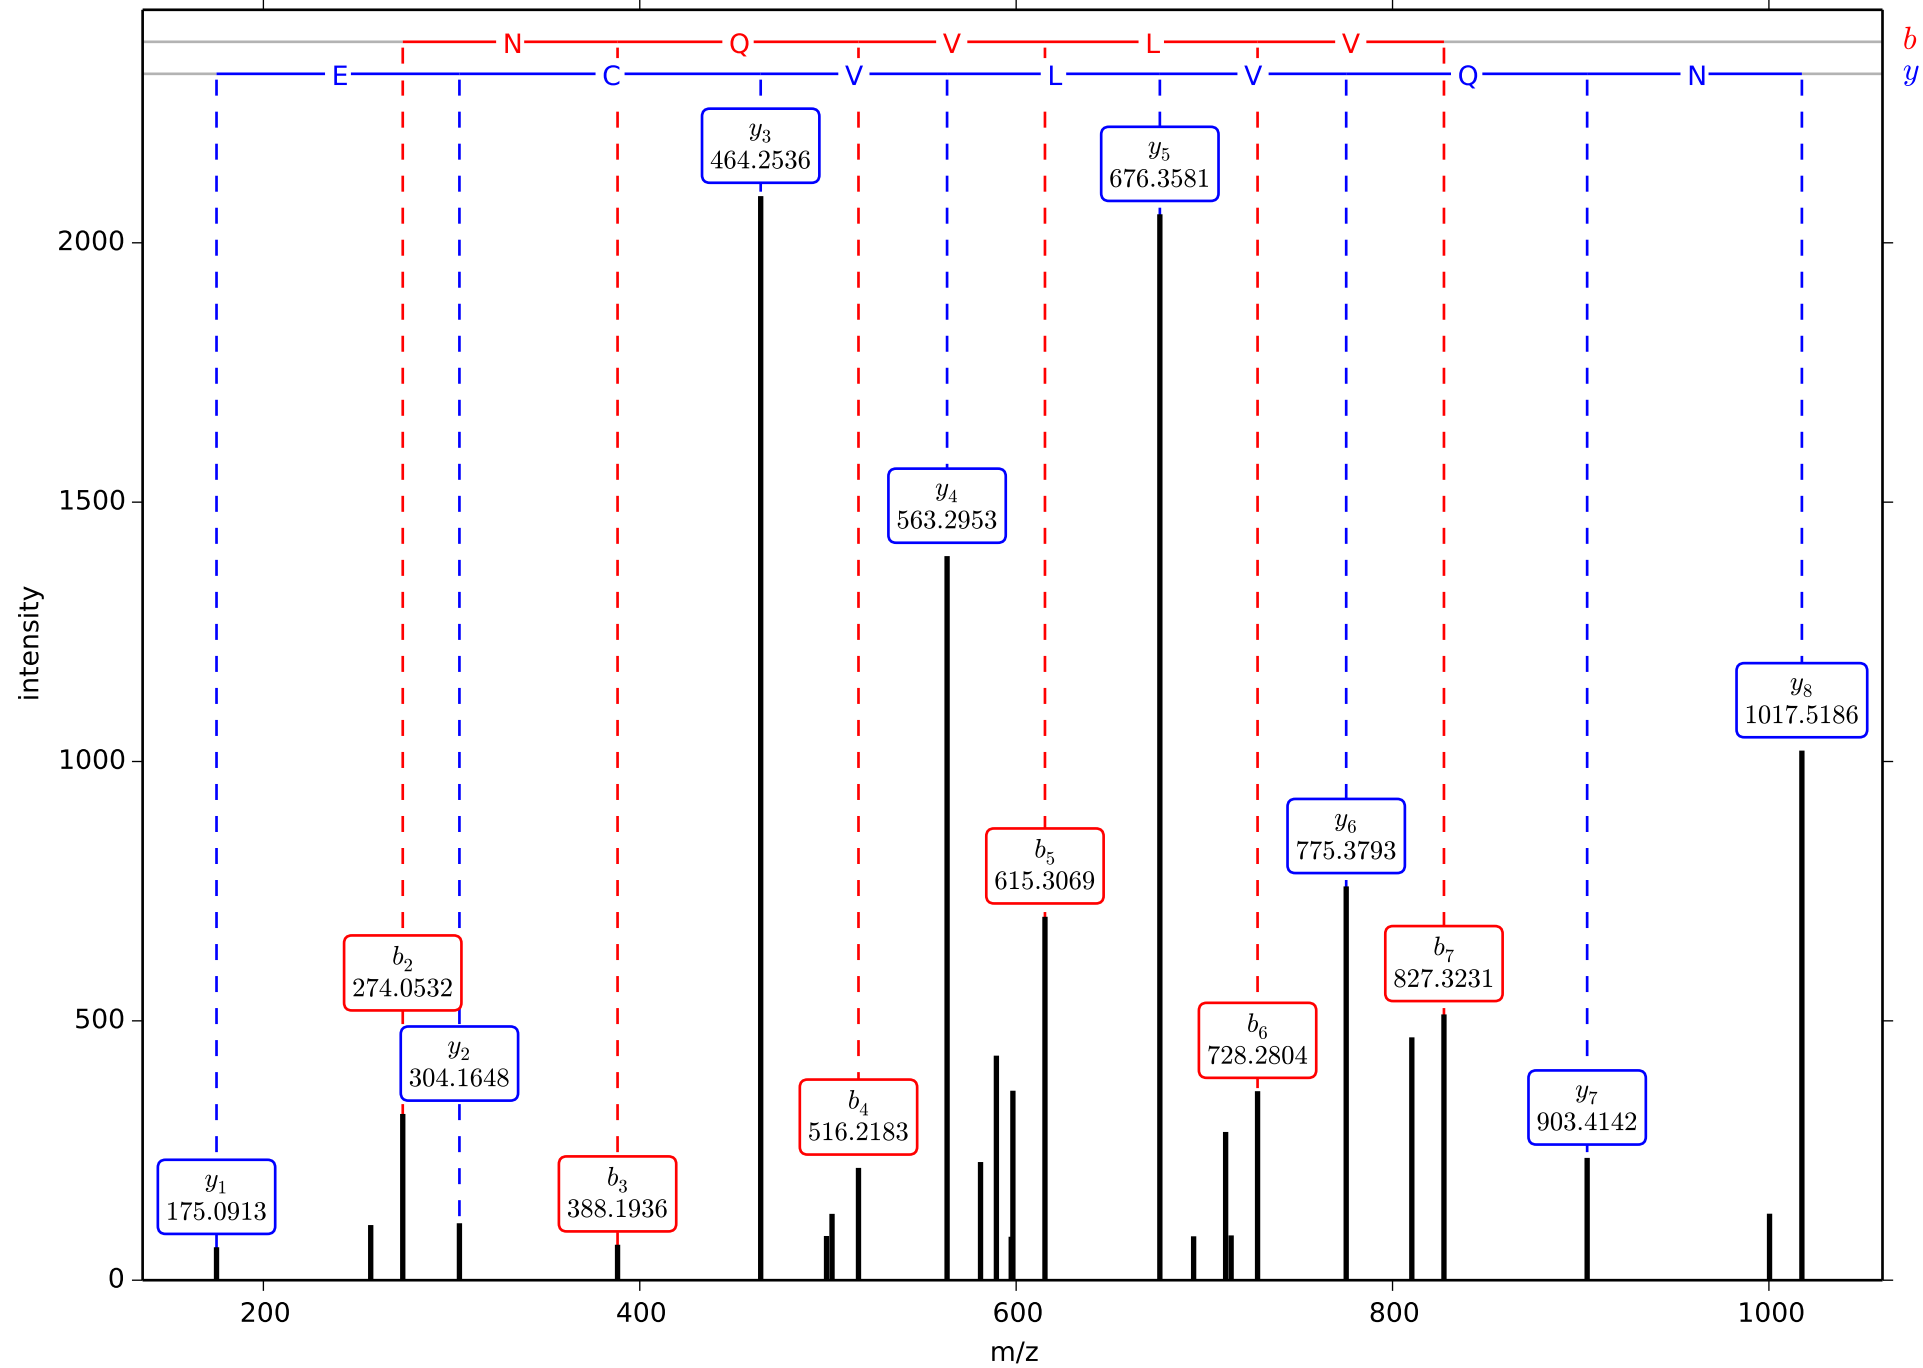

Q9Z2I9 : ILACDDLDEAAK

parent: 667.316120,2+

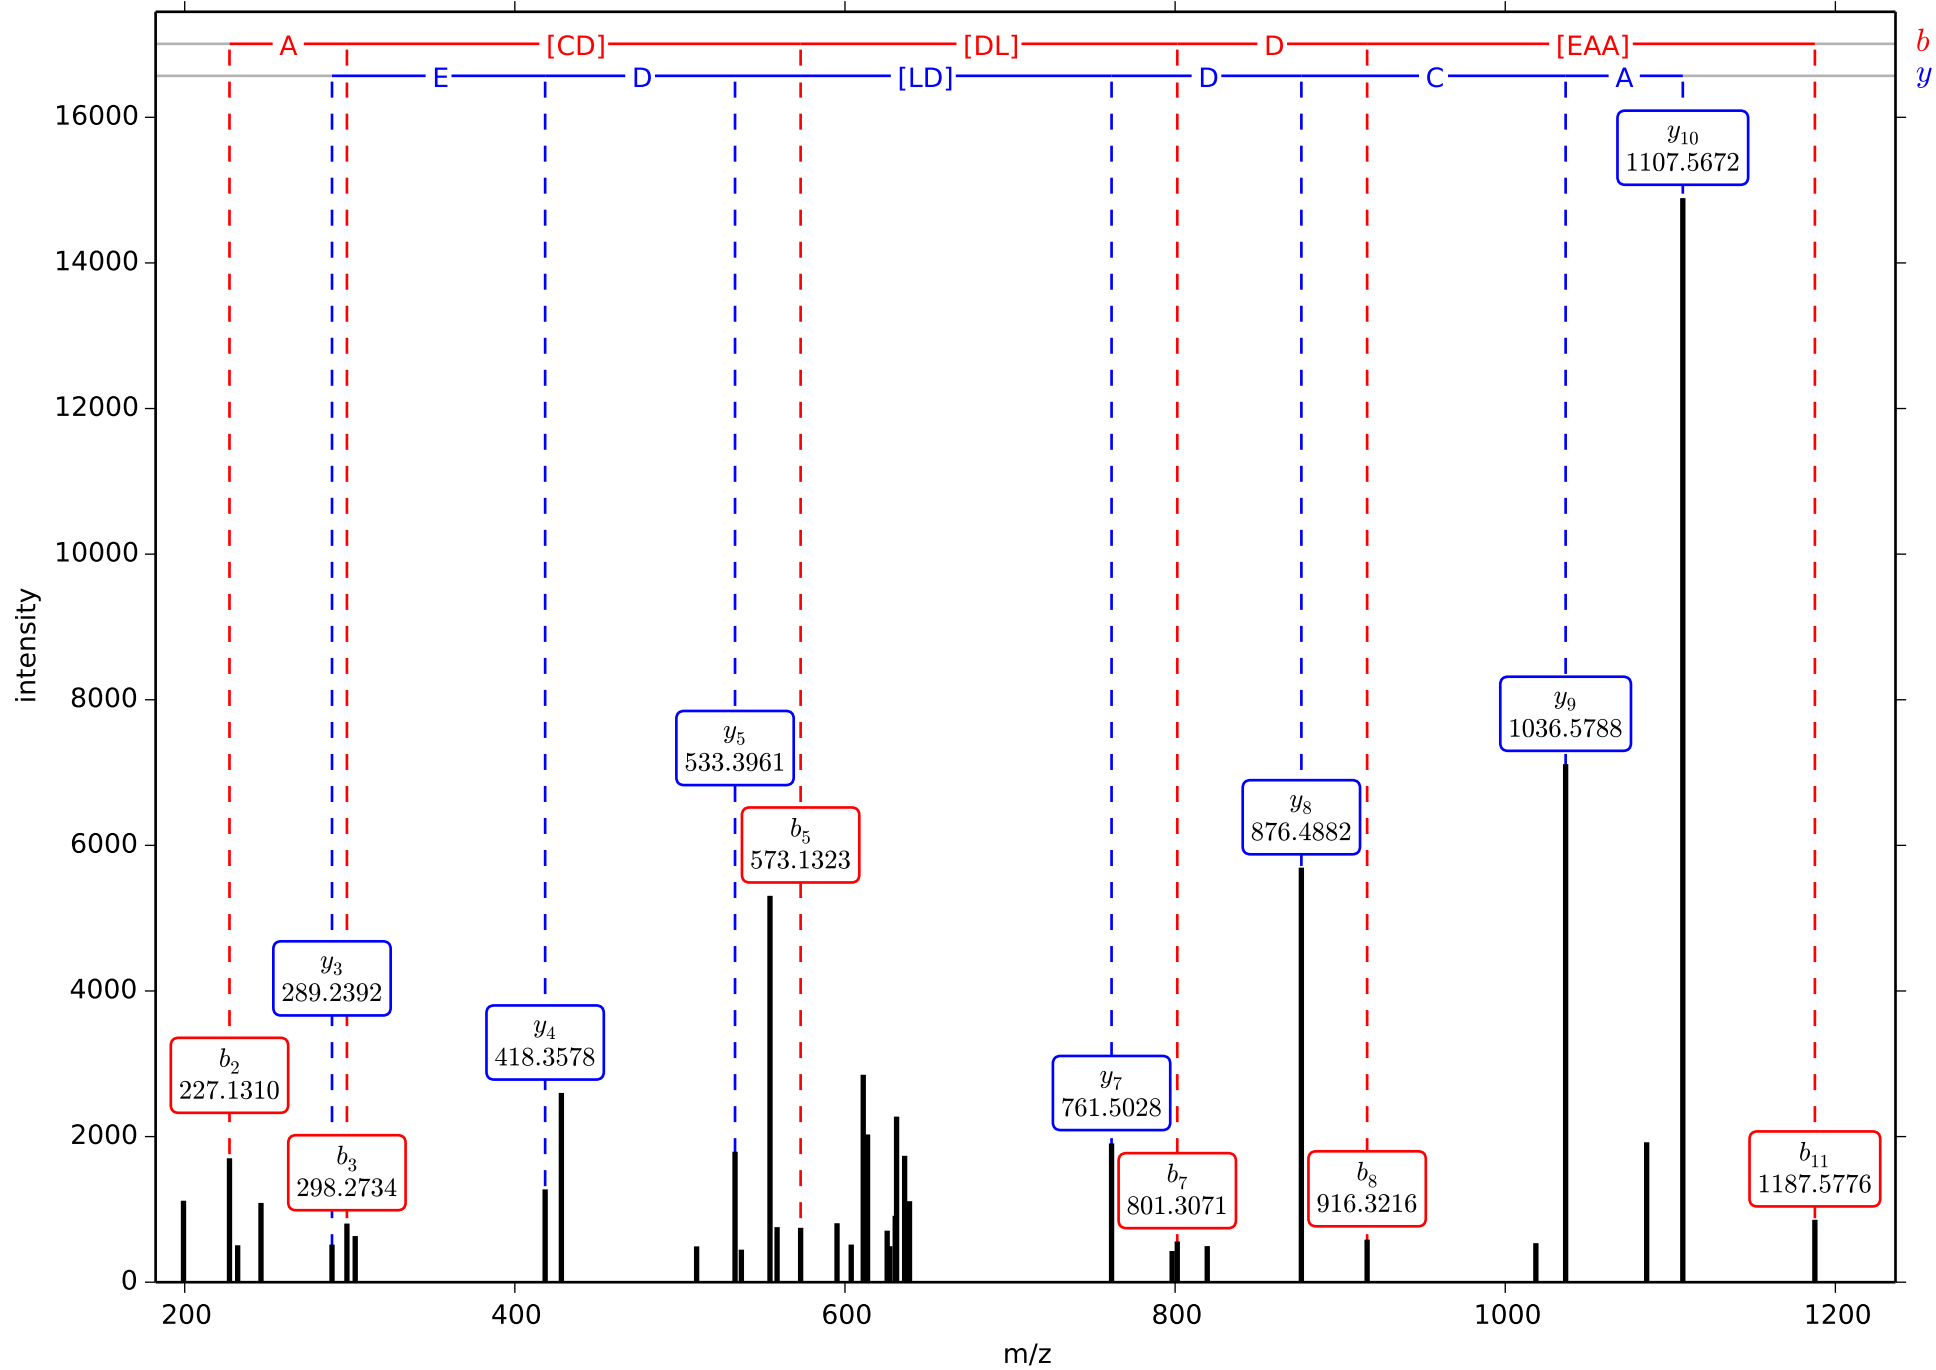

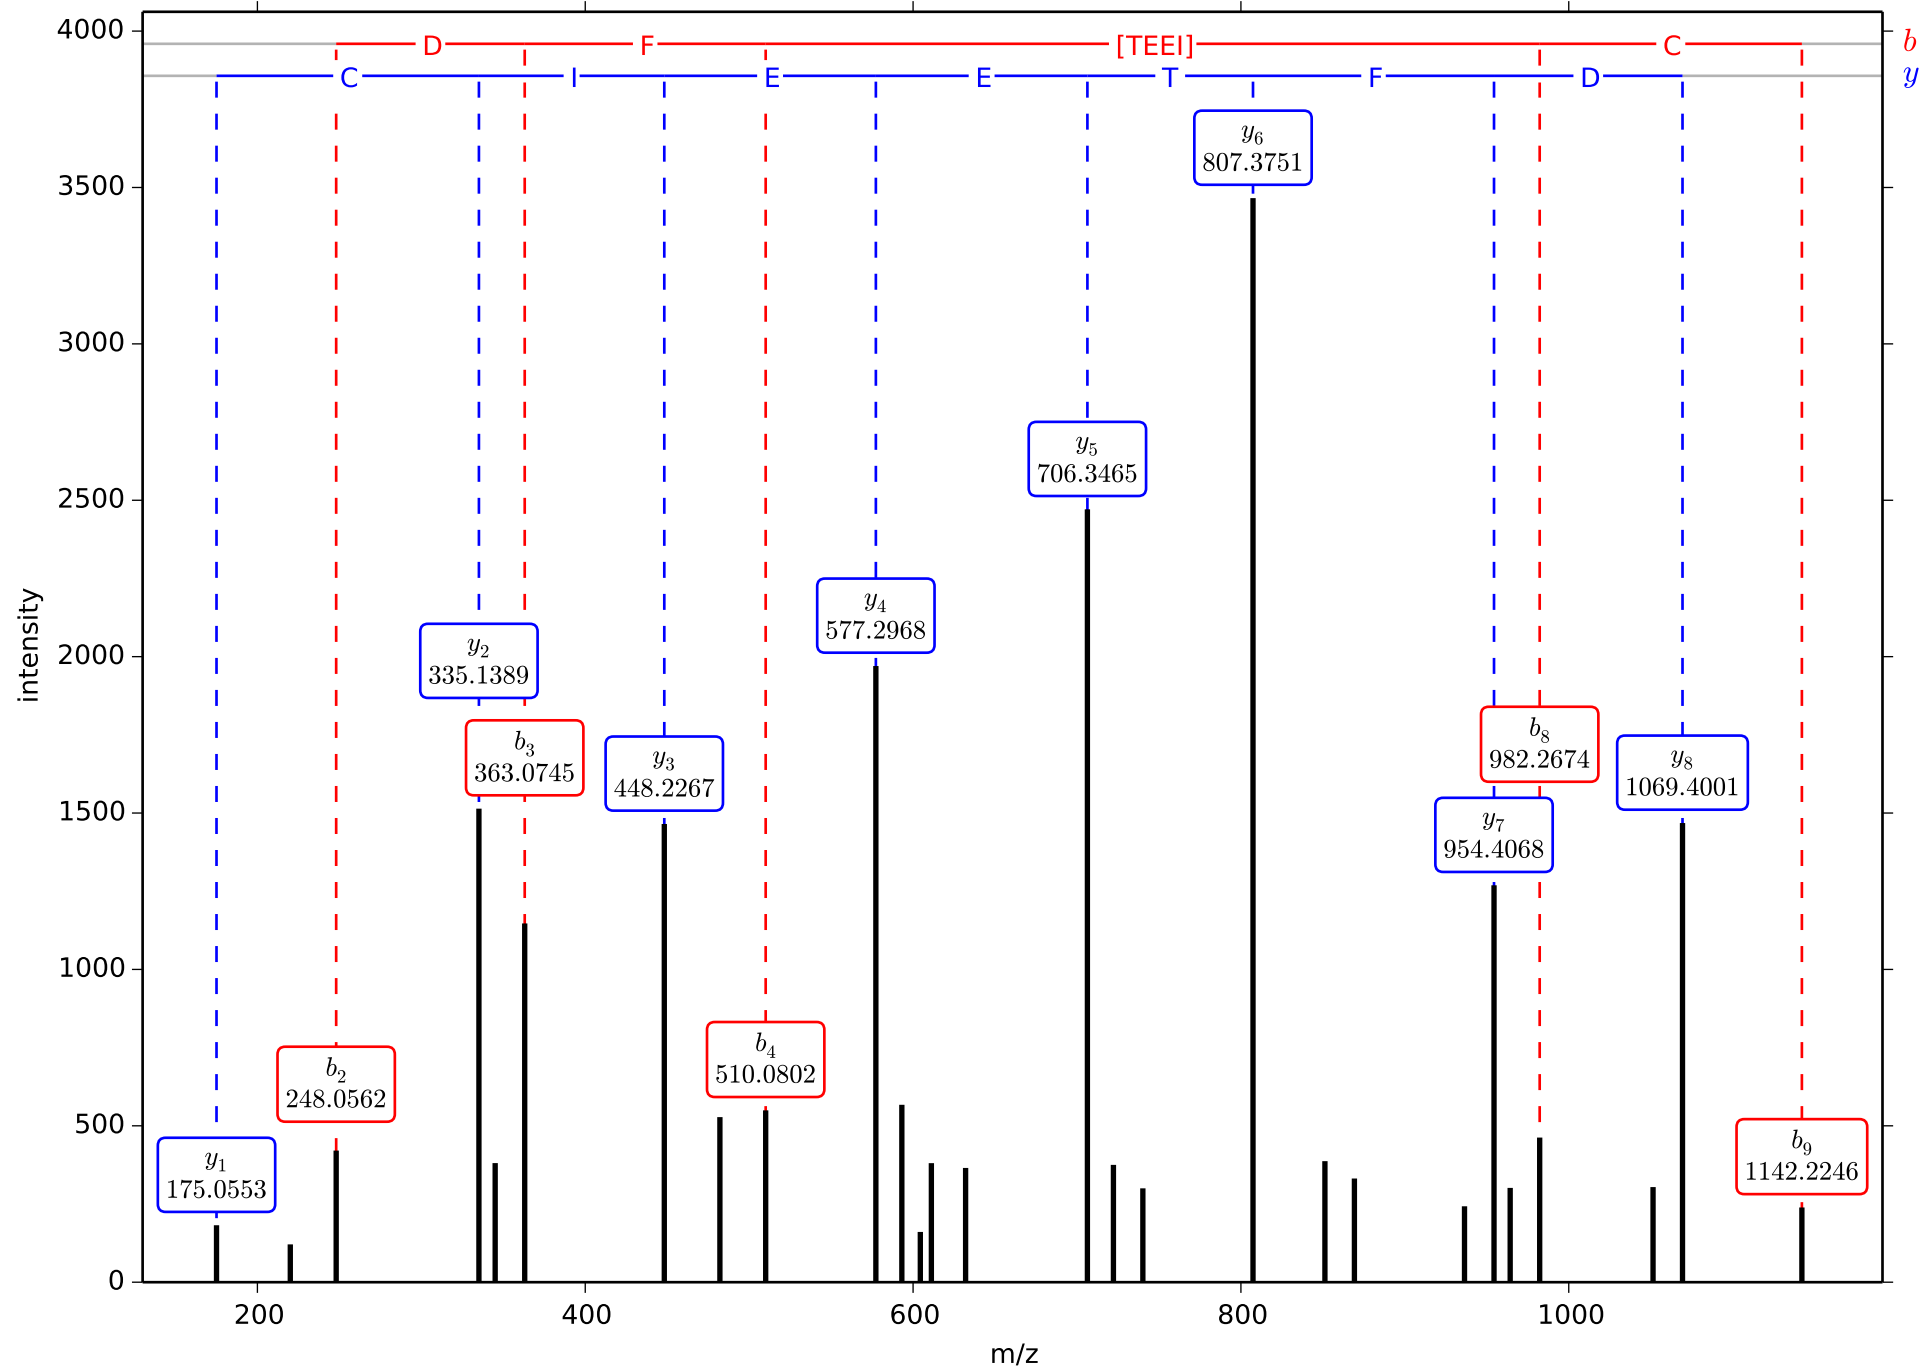

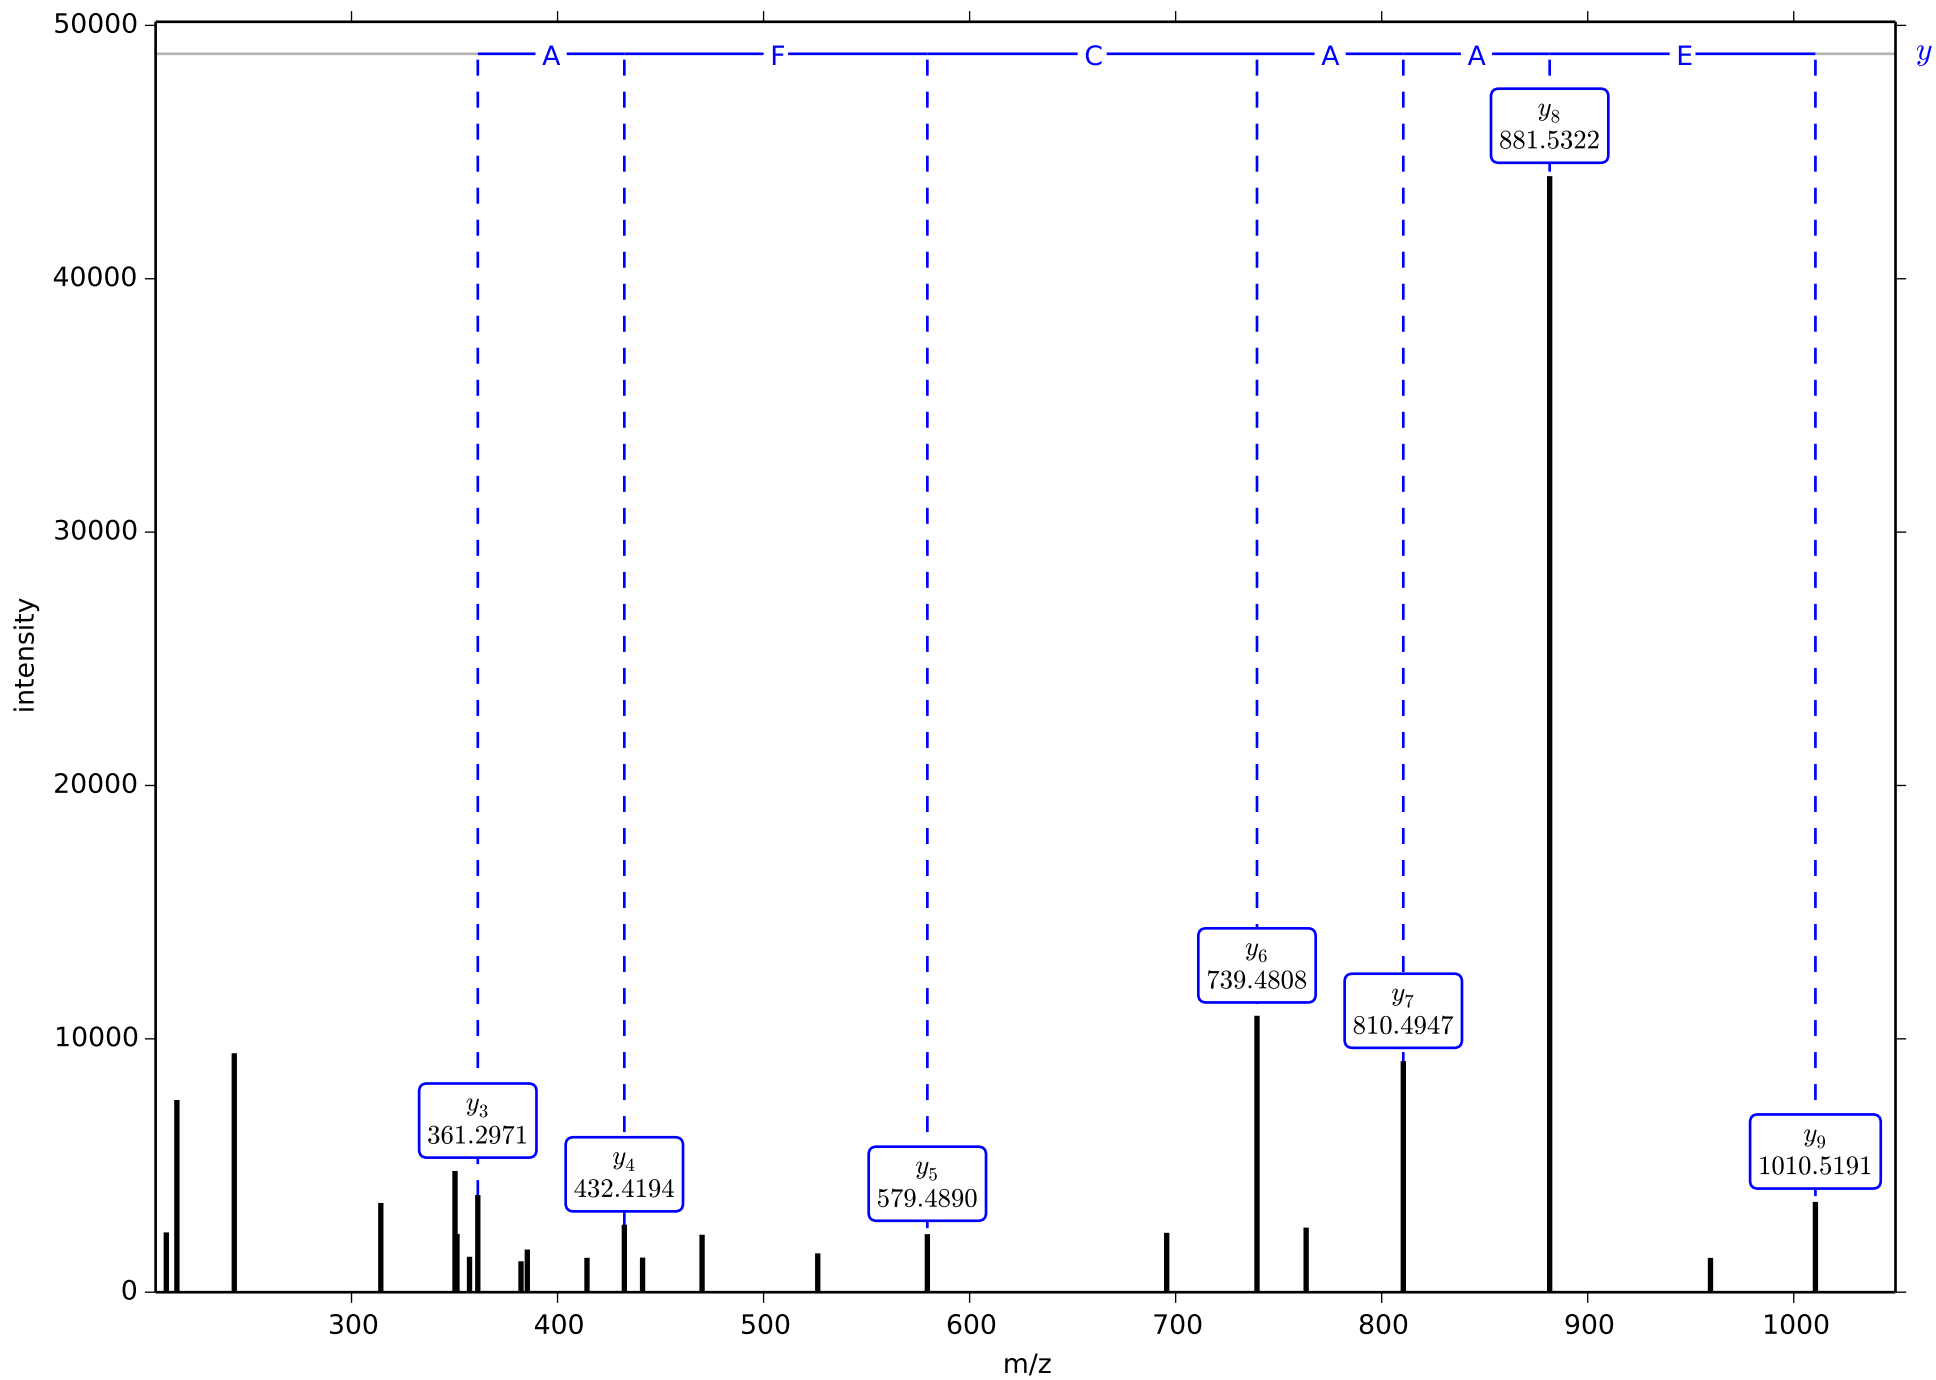

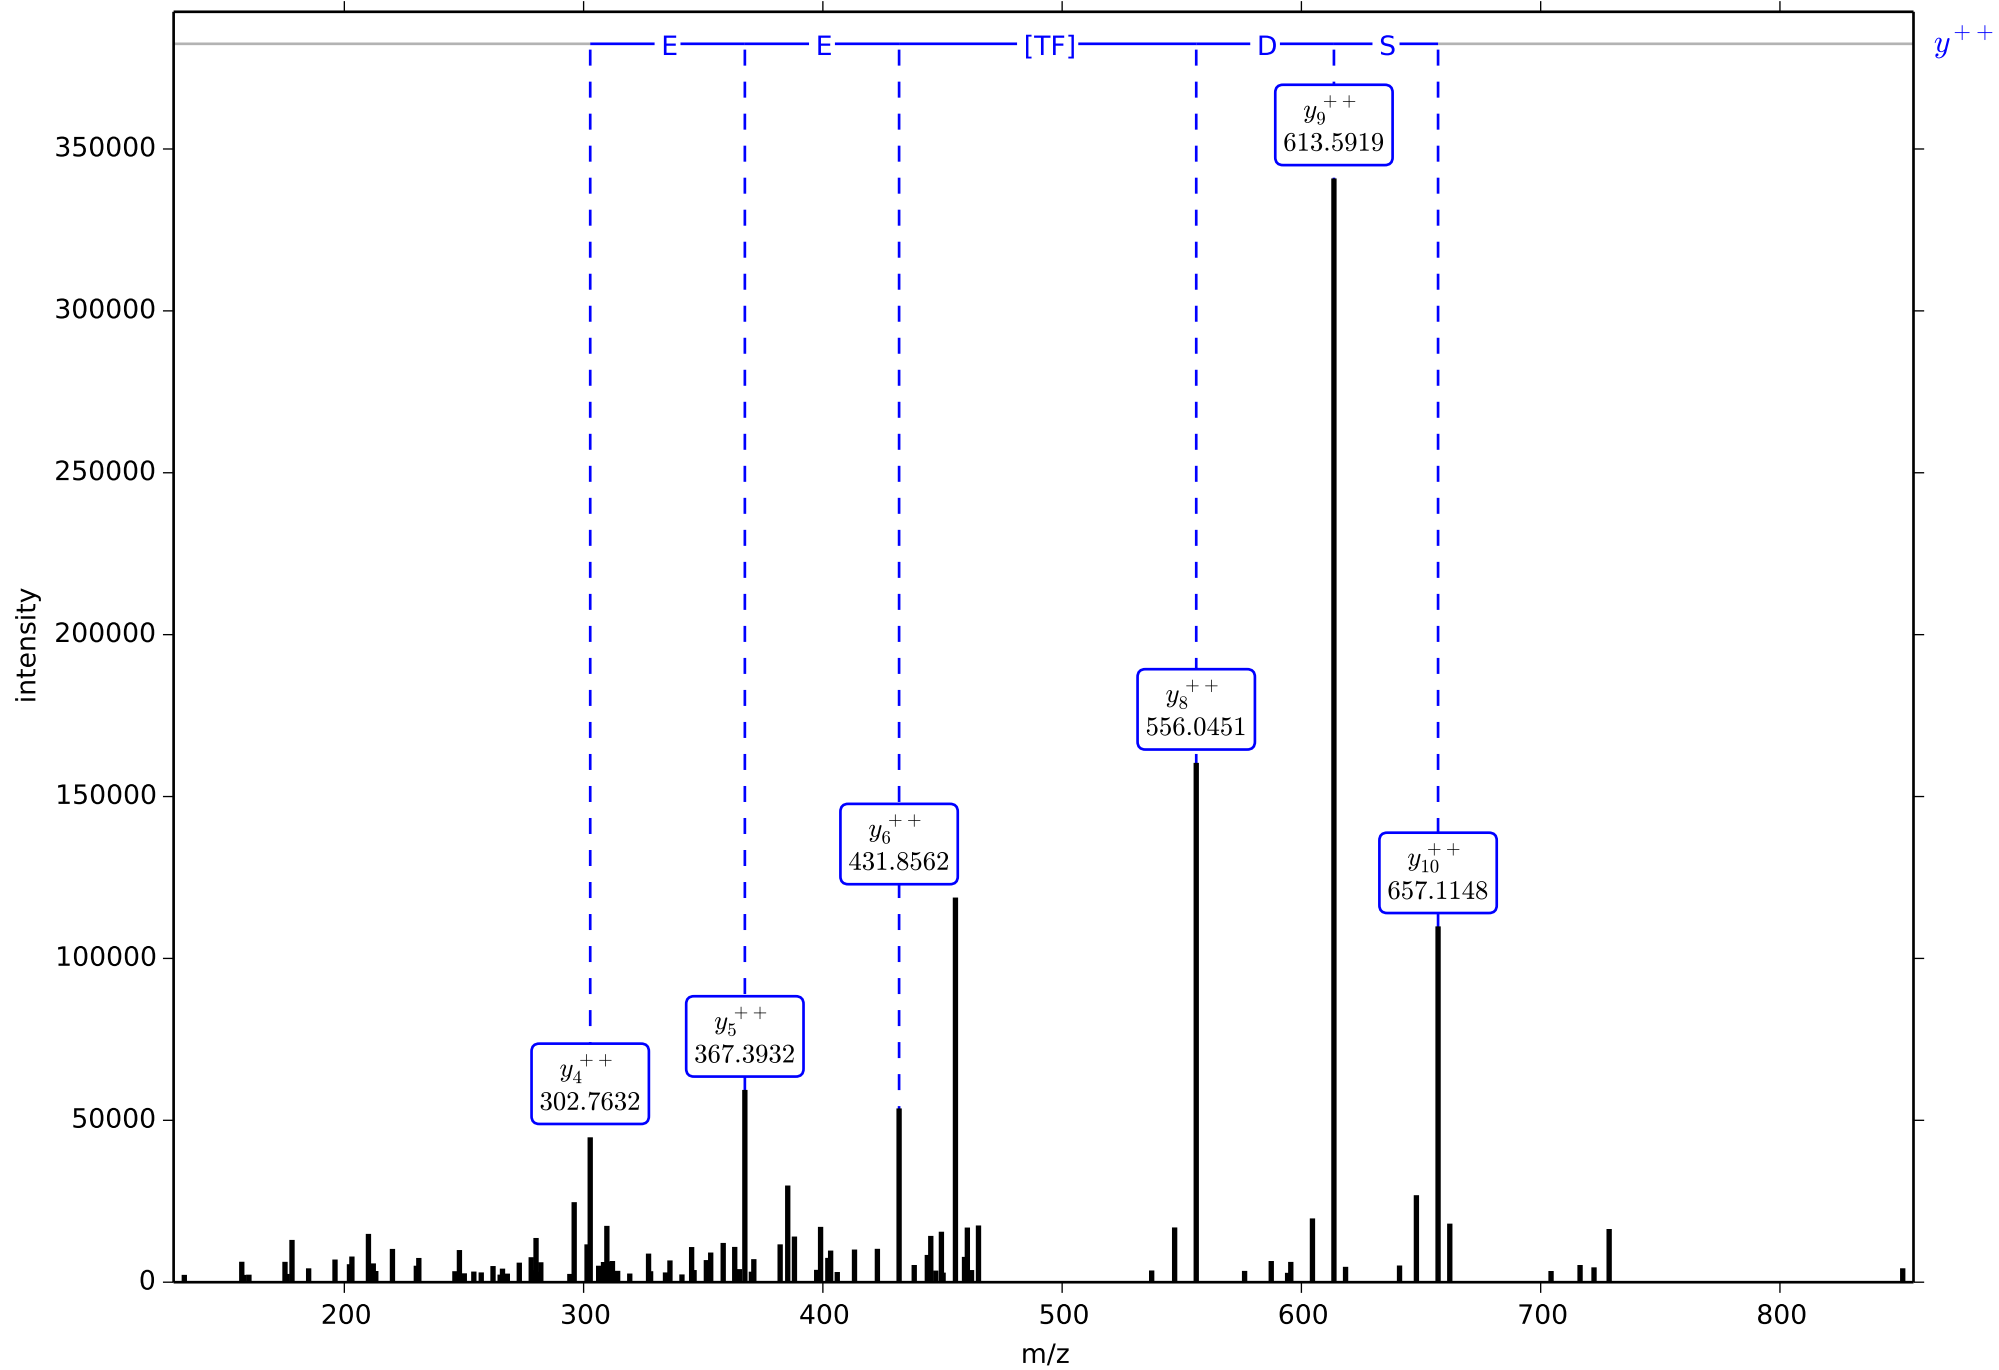

P19096 : EACPELDYFVAFSSVSCGR

parent: 1097.476600,2+

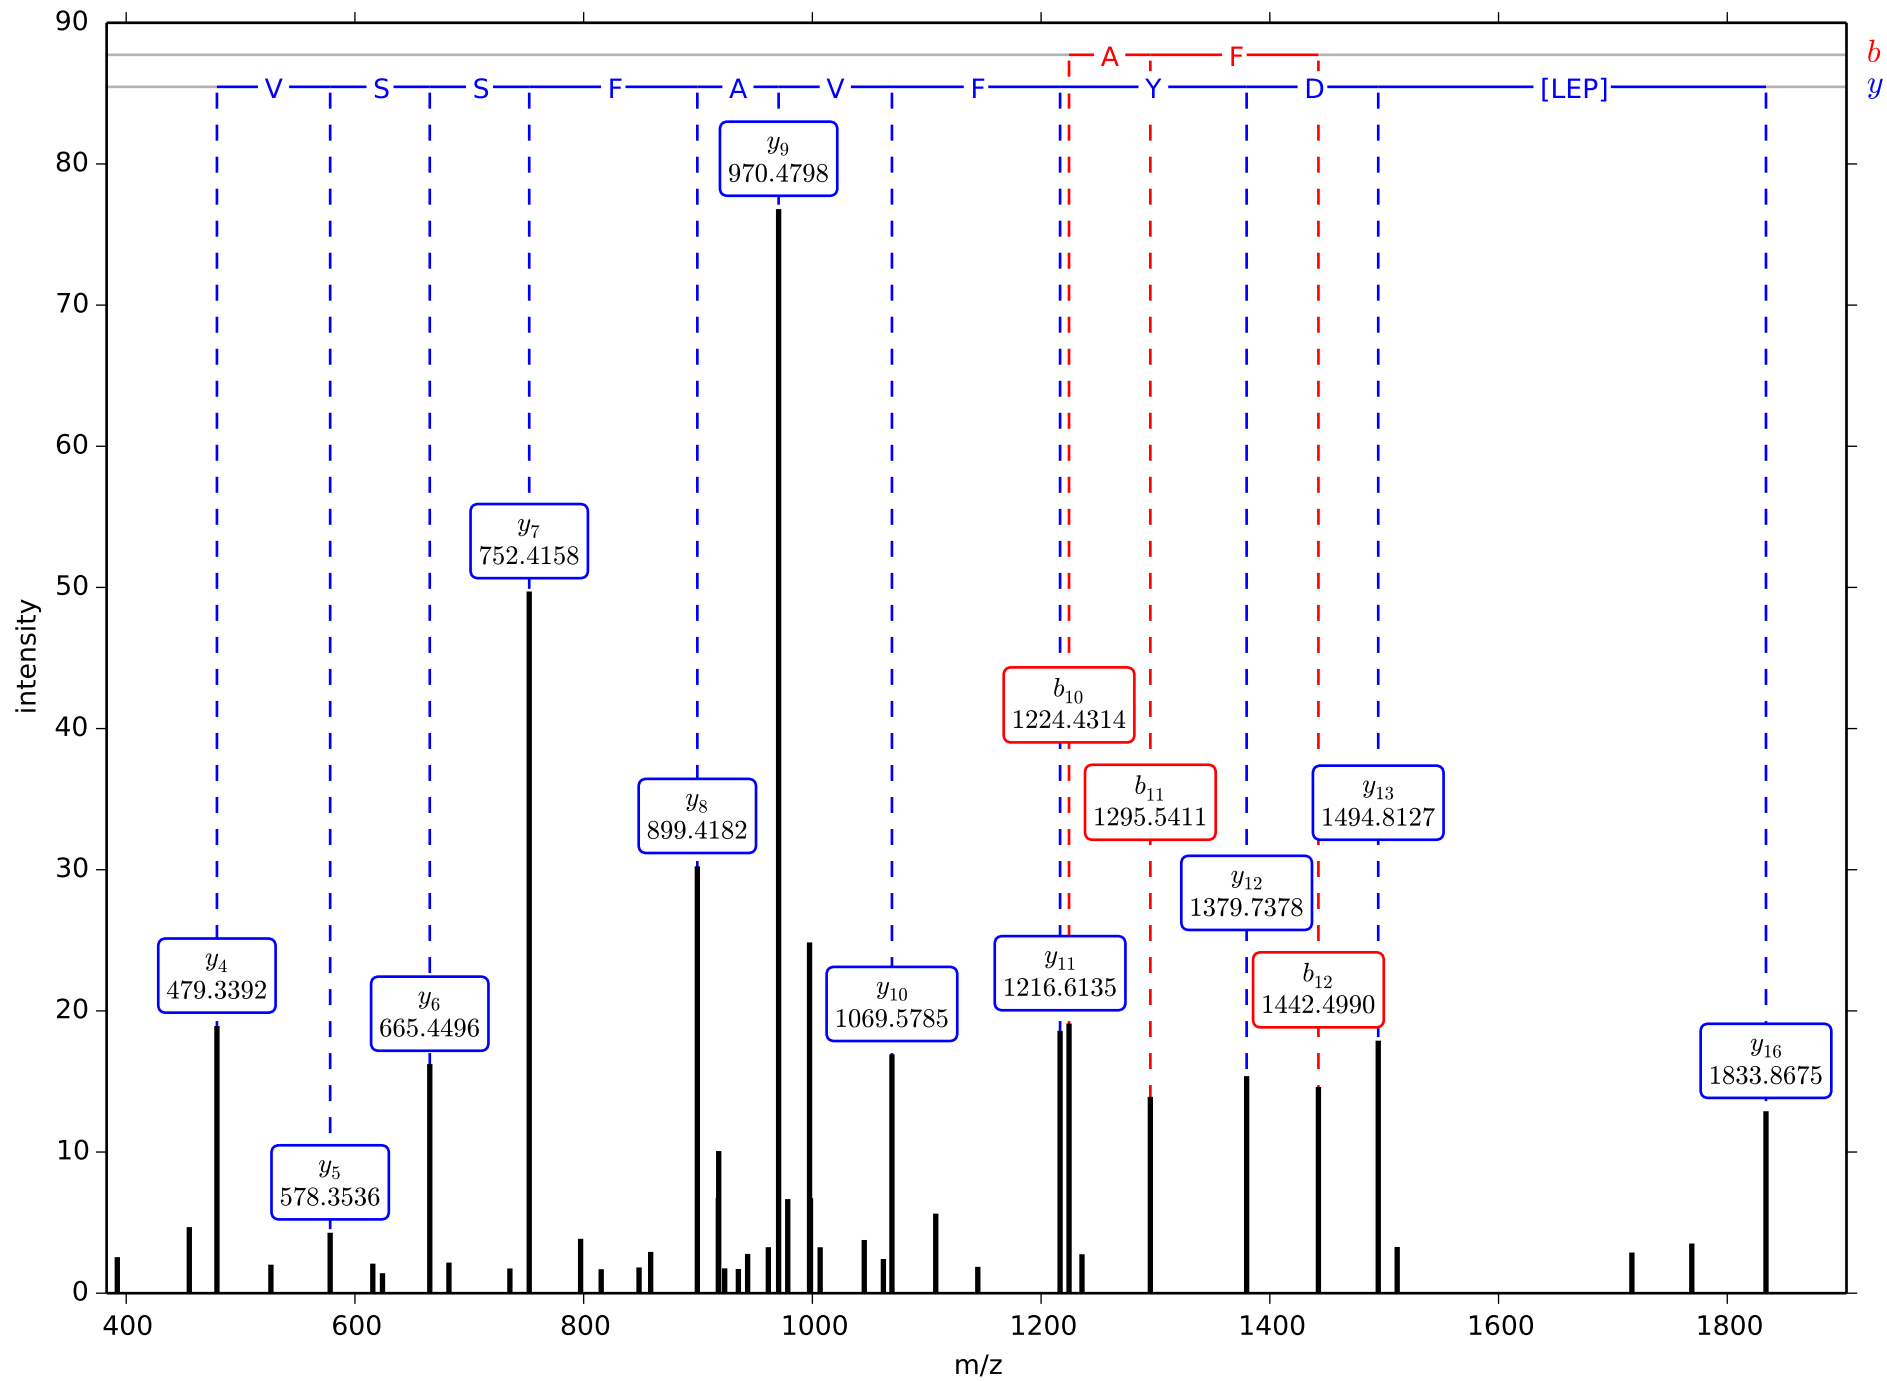



P19096 : HTQPSSSGAQLCTVYYAS

parent: 978.932260,2+

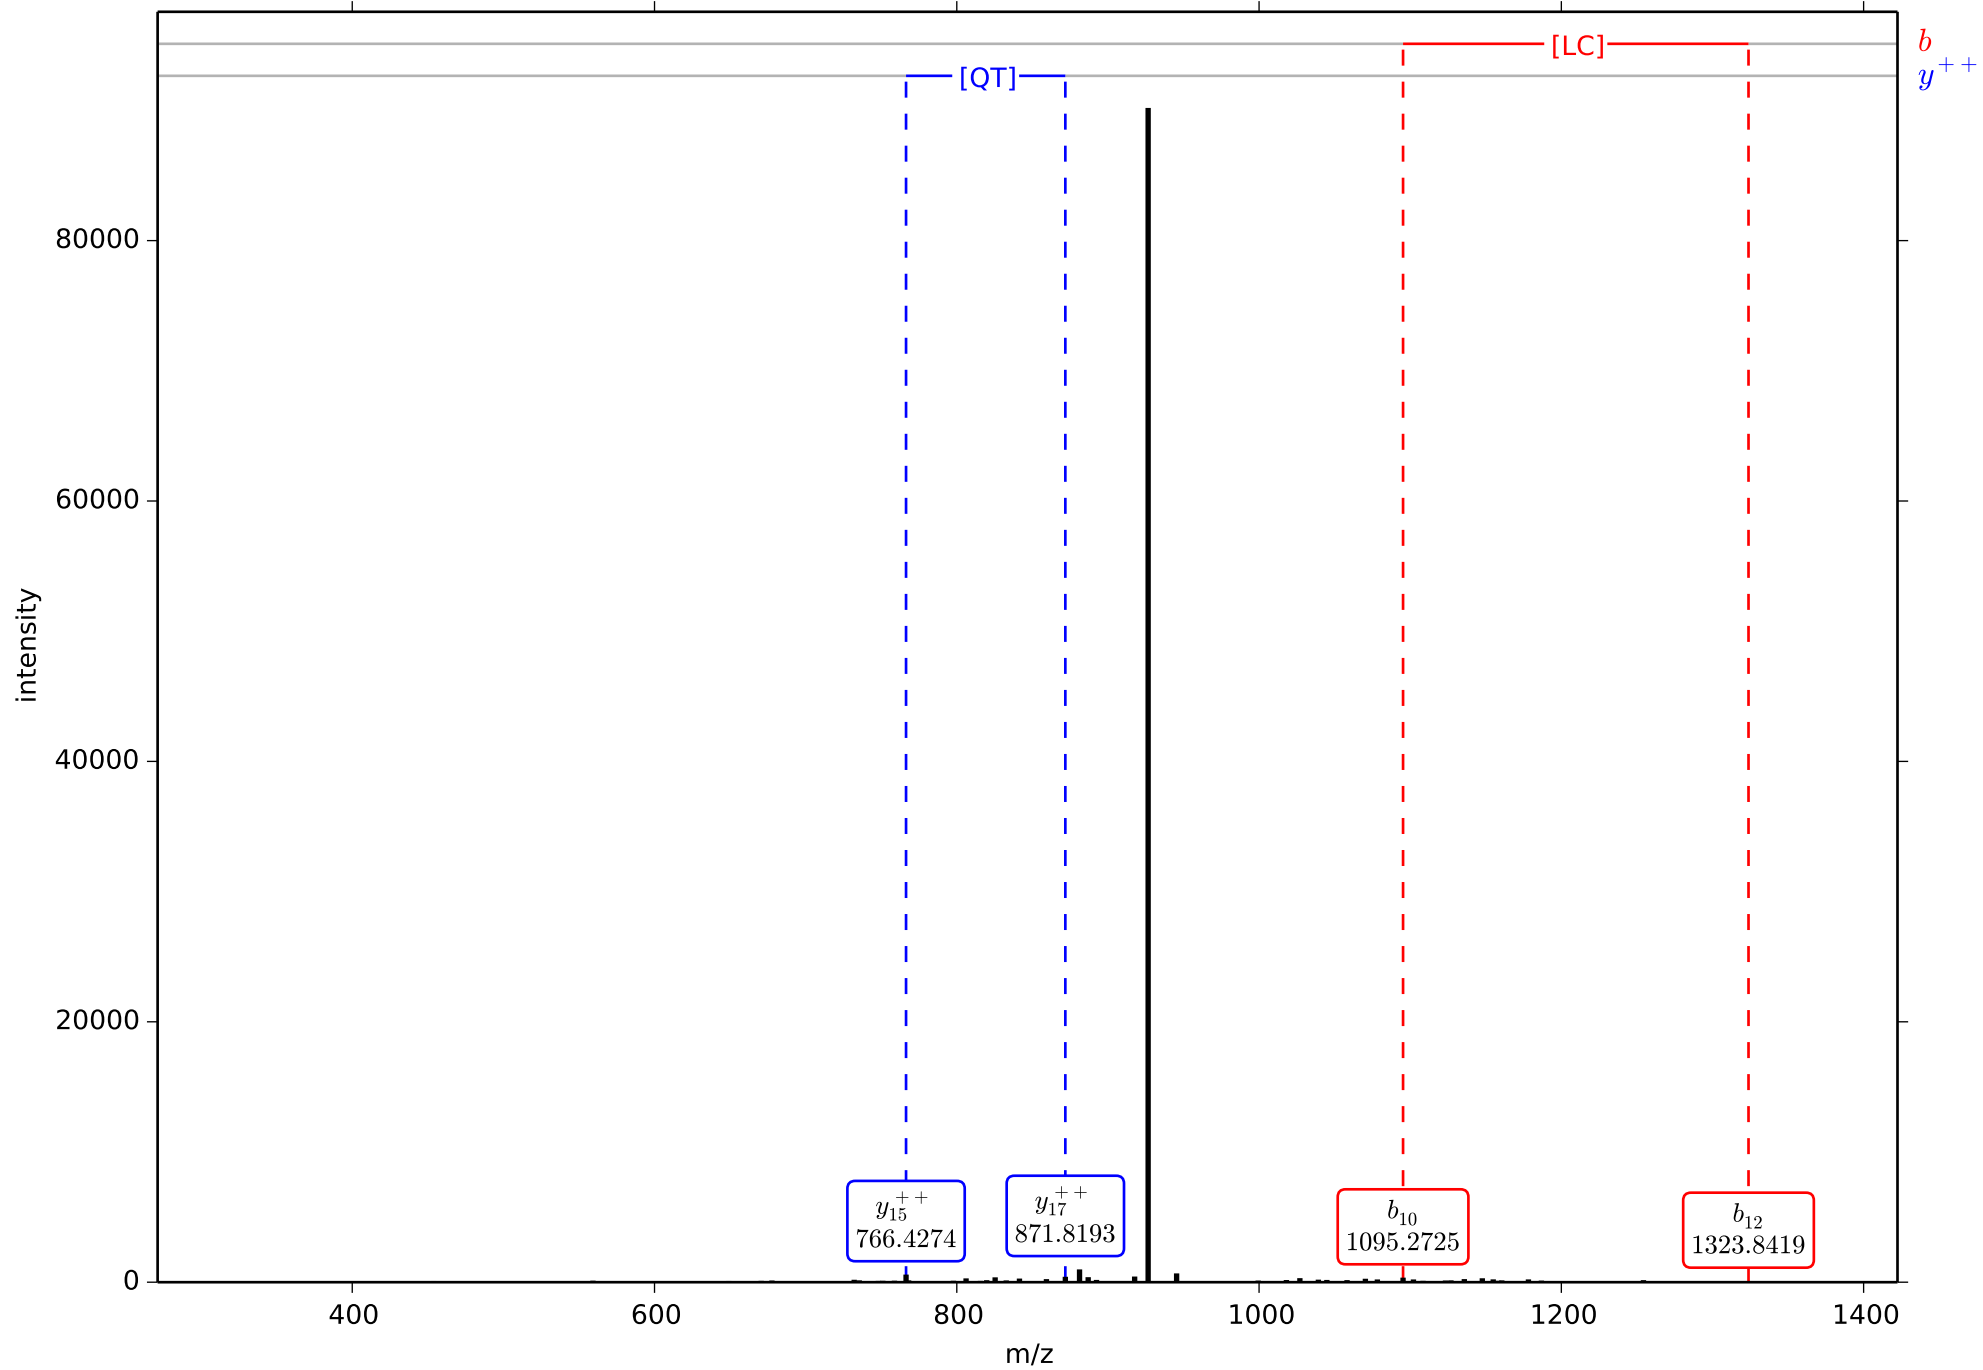

Q61316 : GCALQCAILSPAFLK

parent: 768.387160,2+

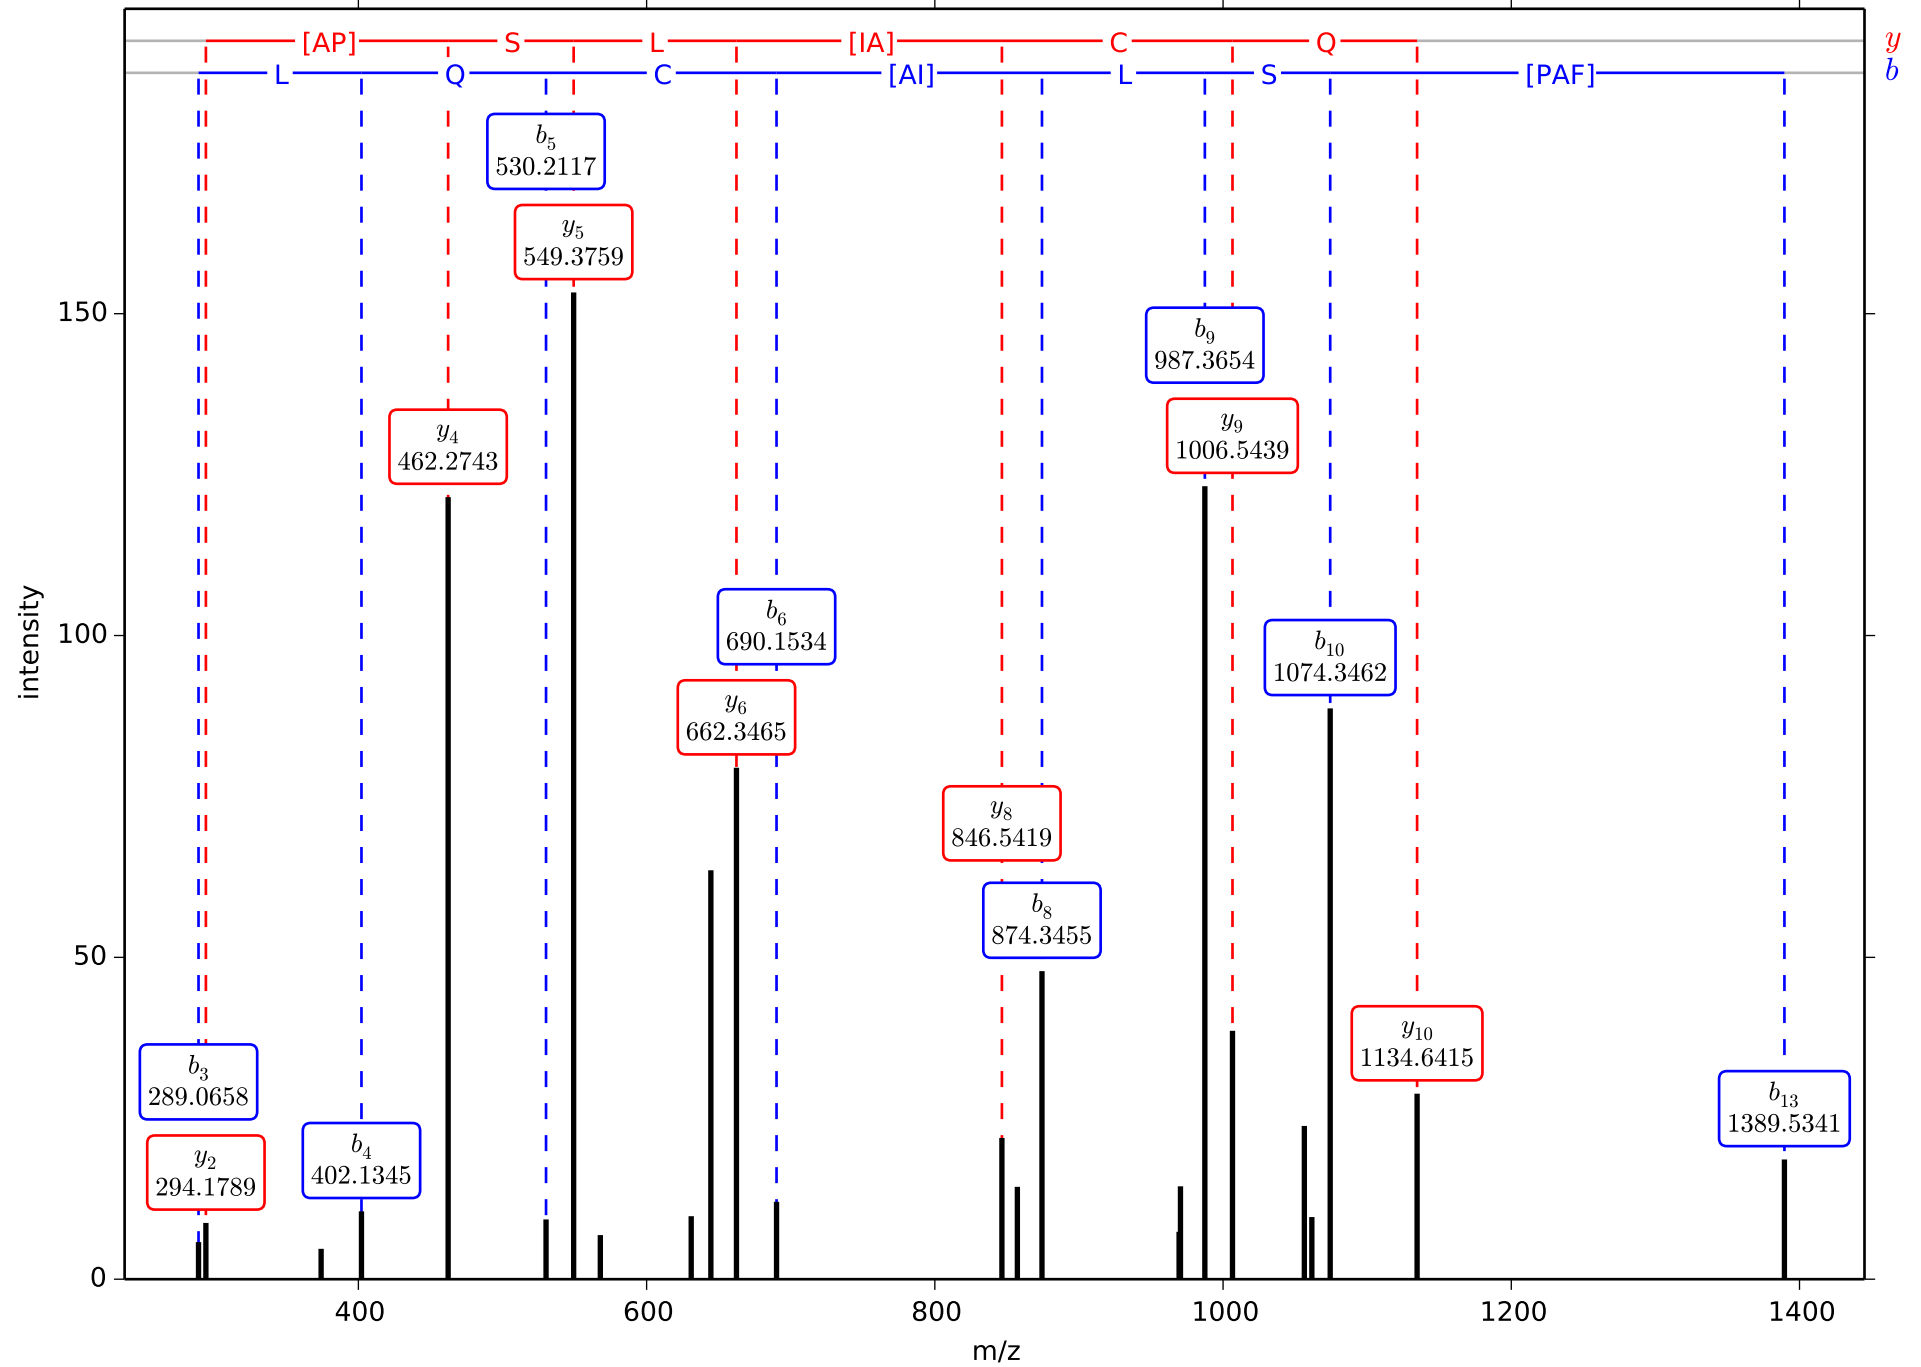

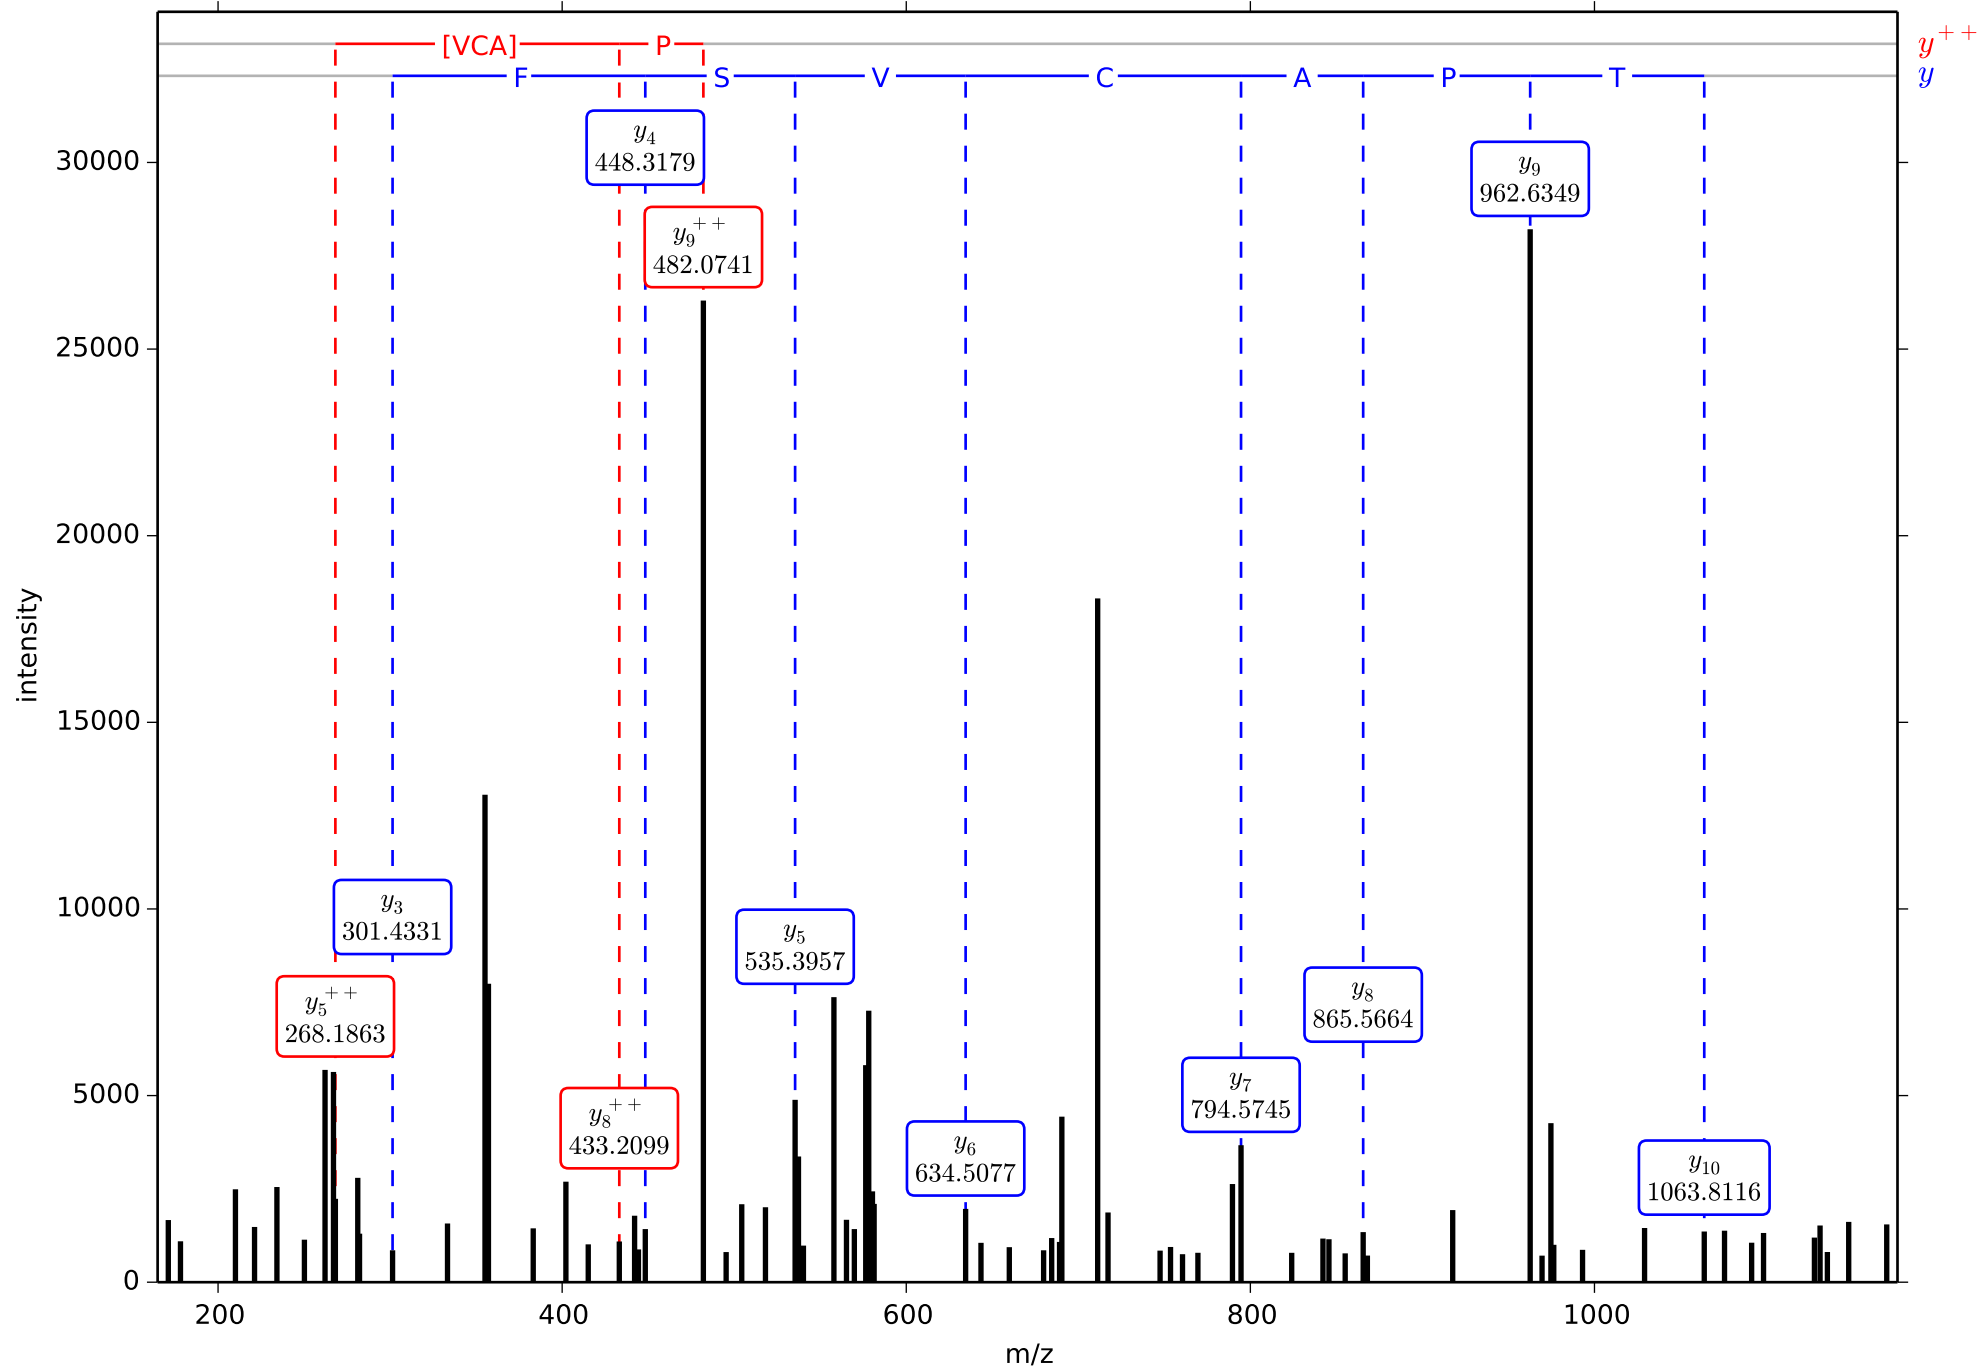

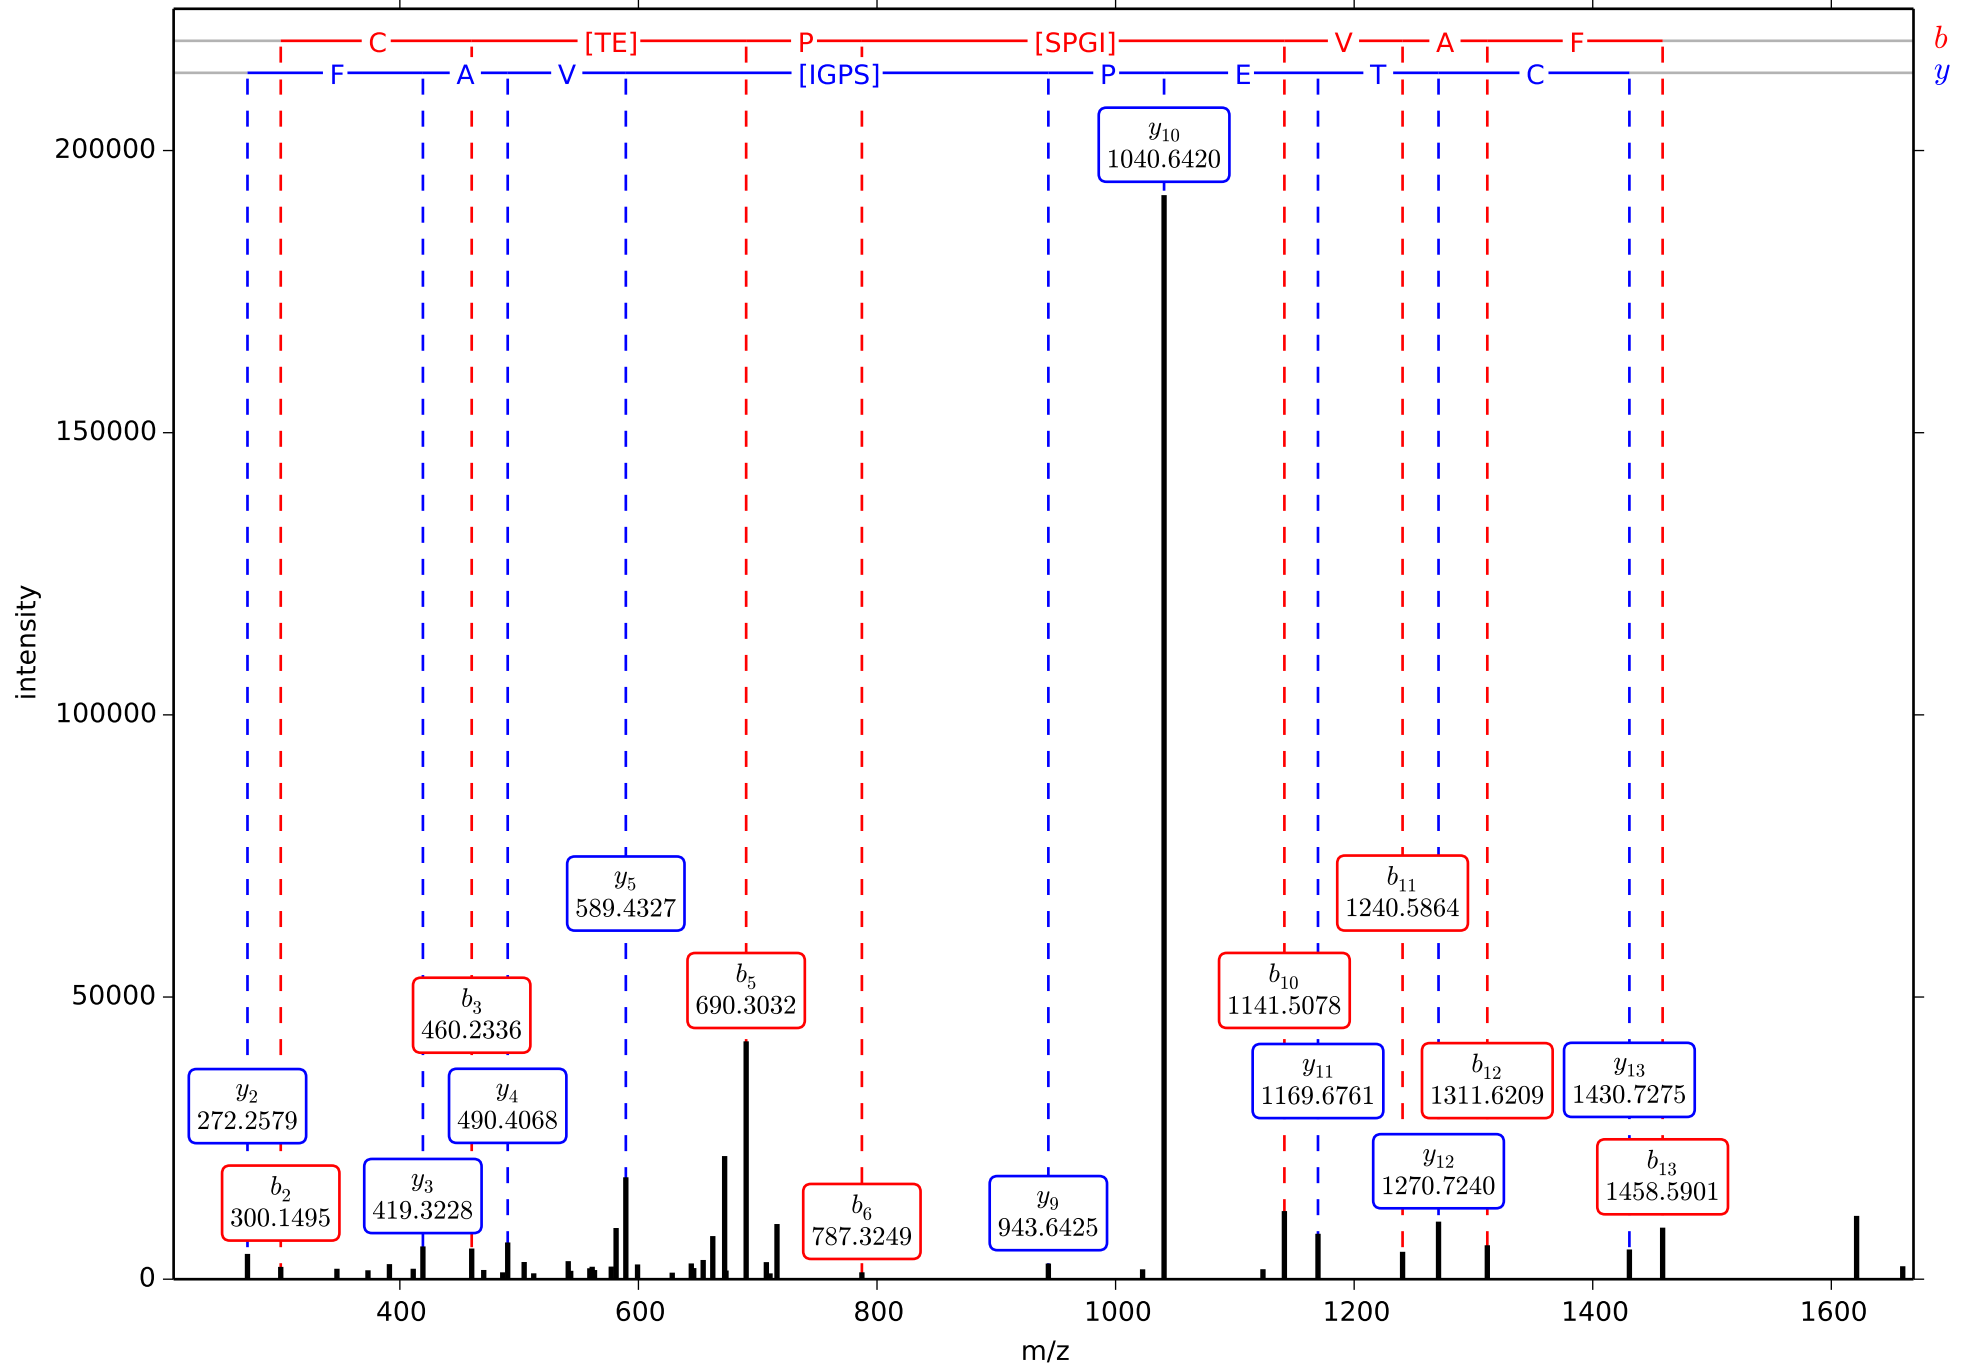

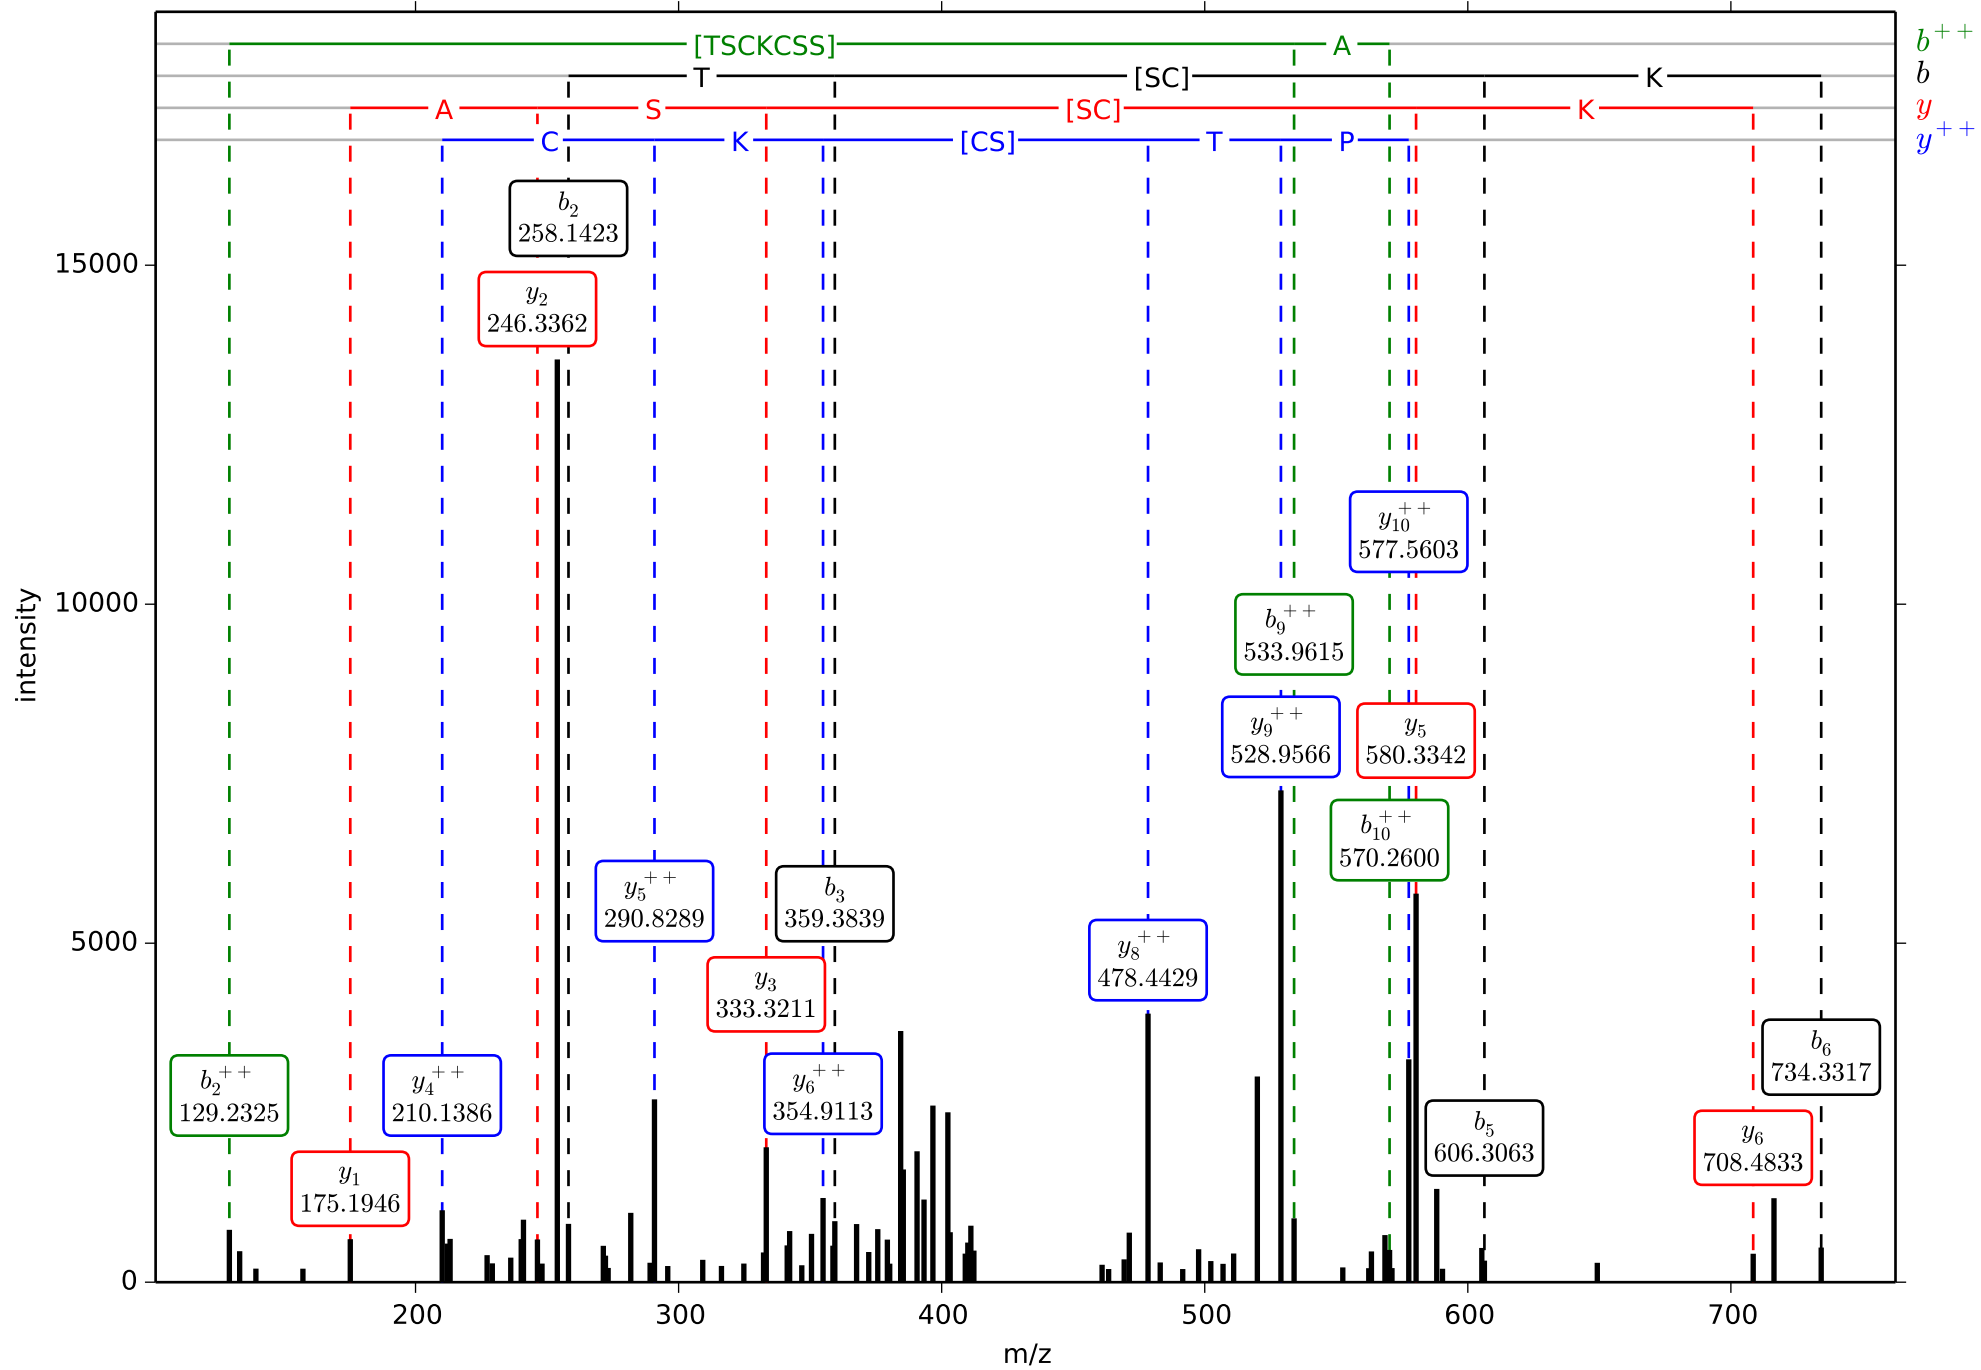

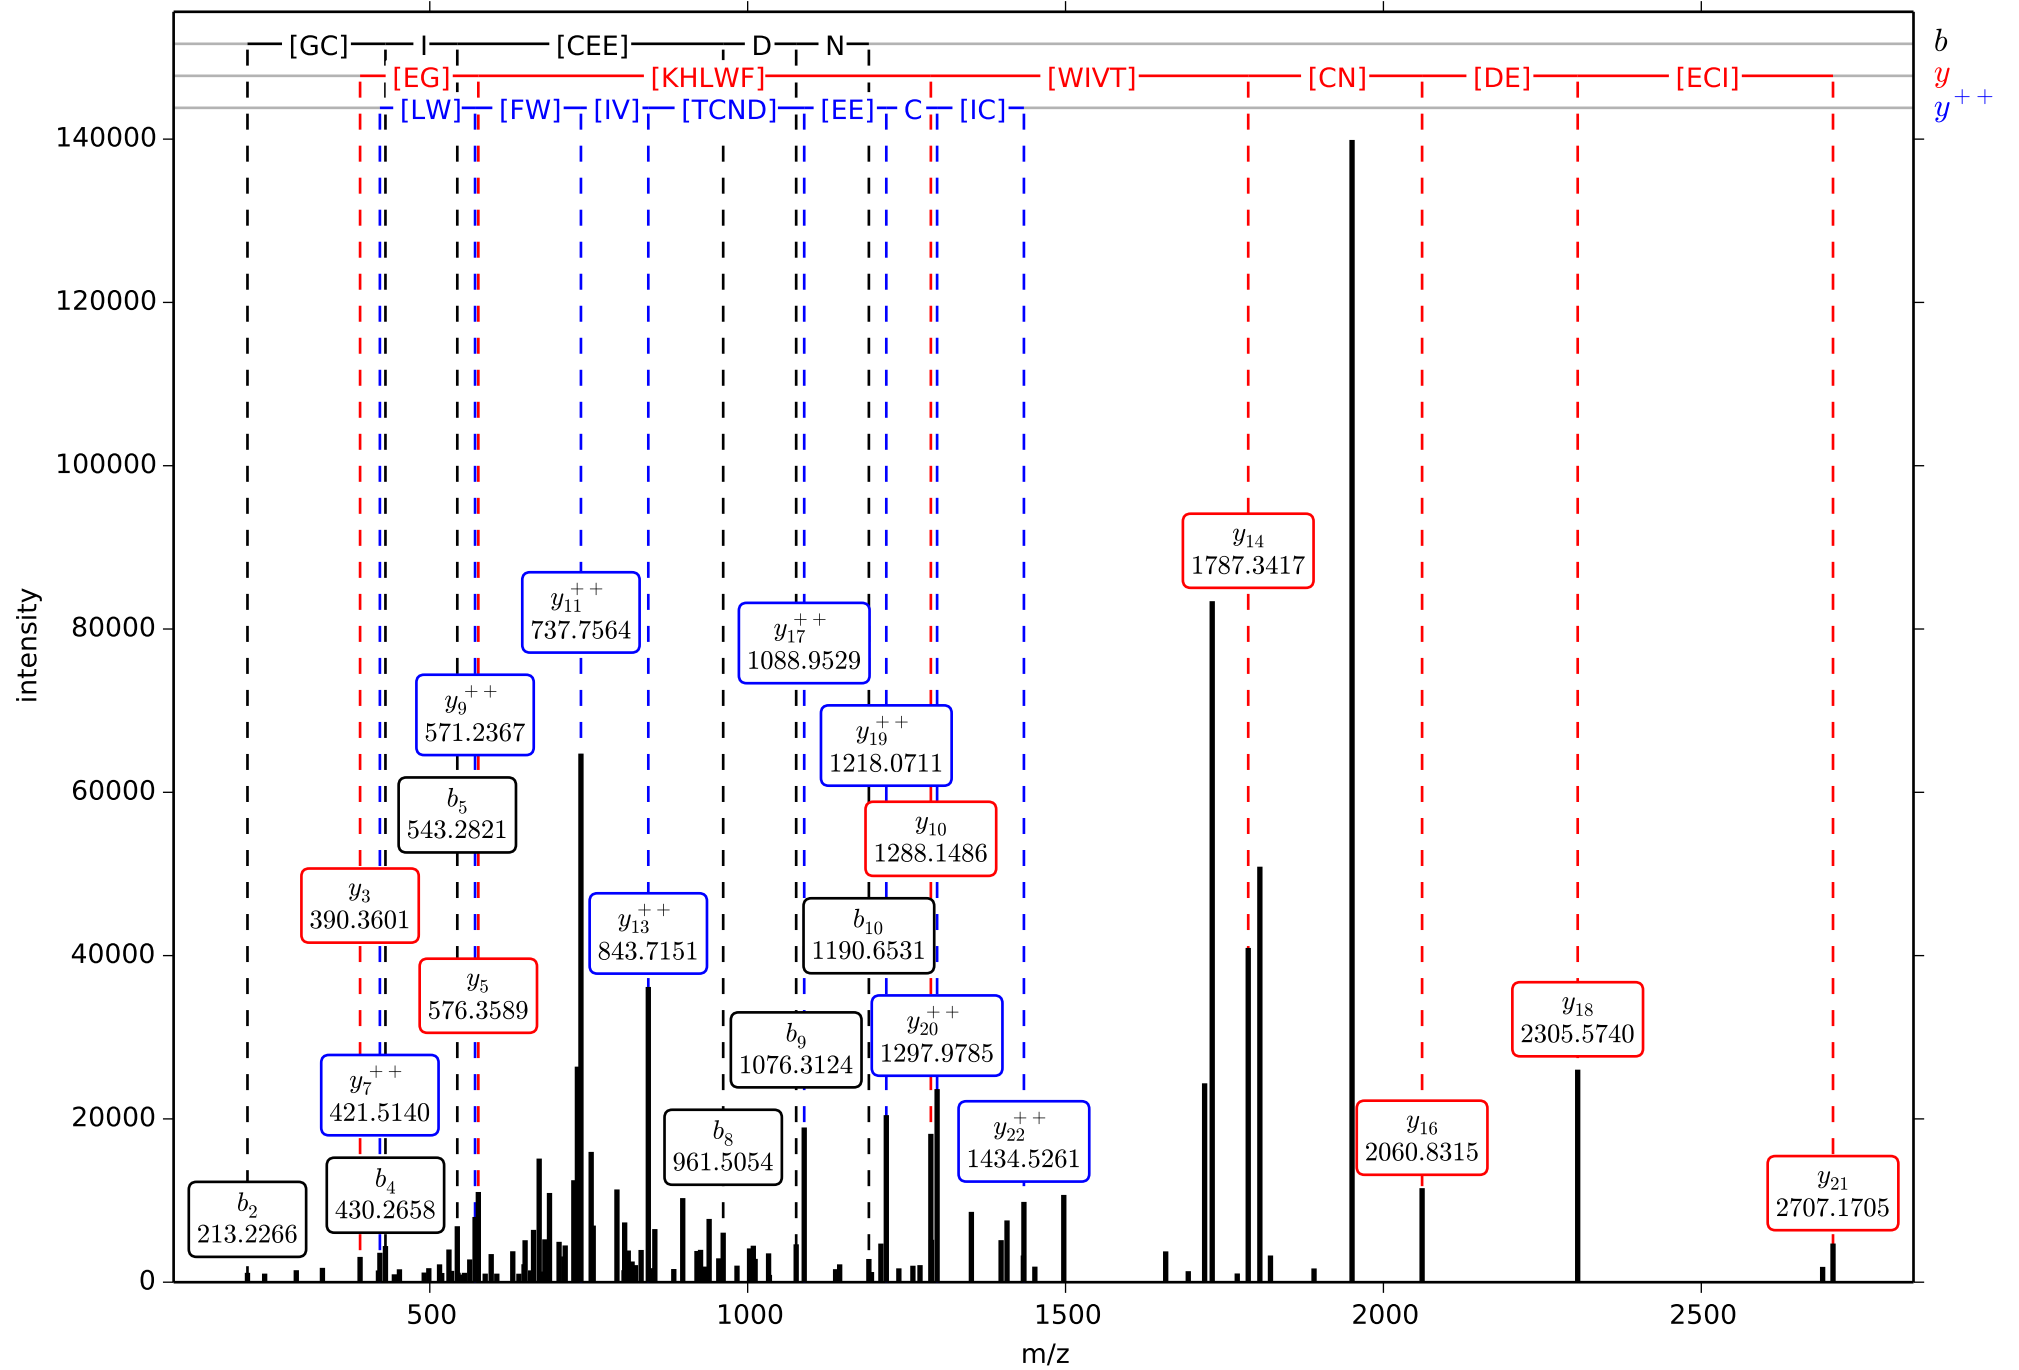

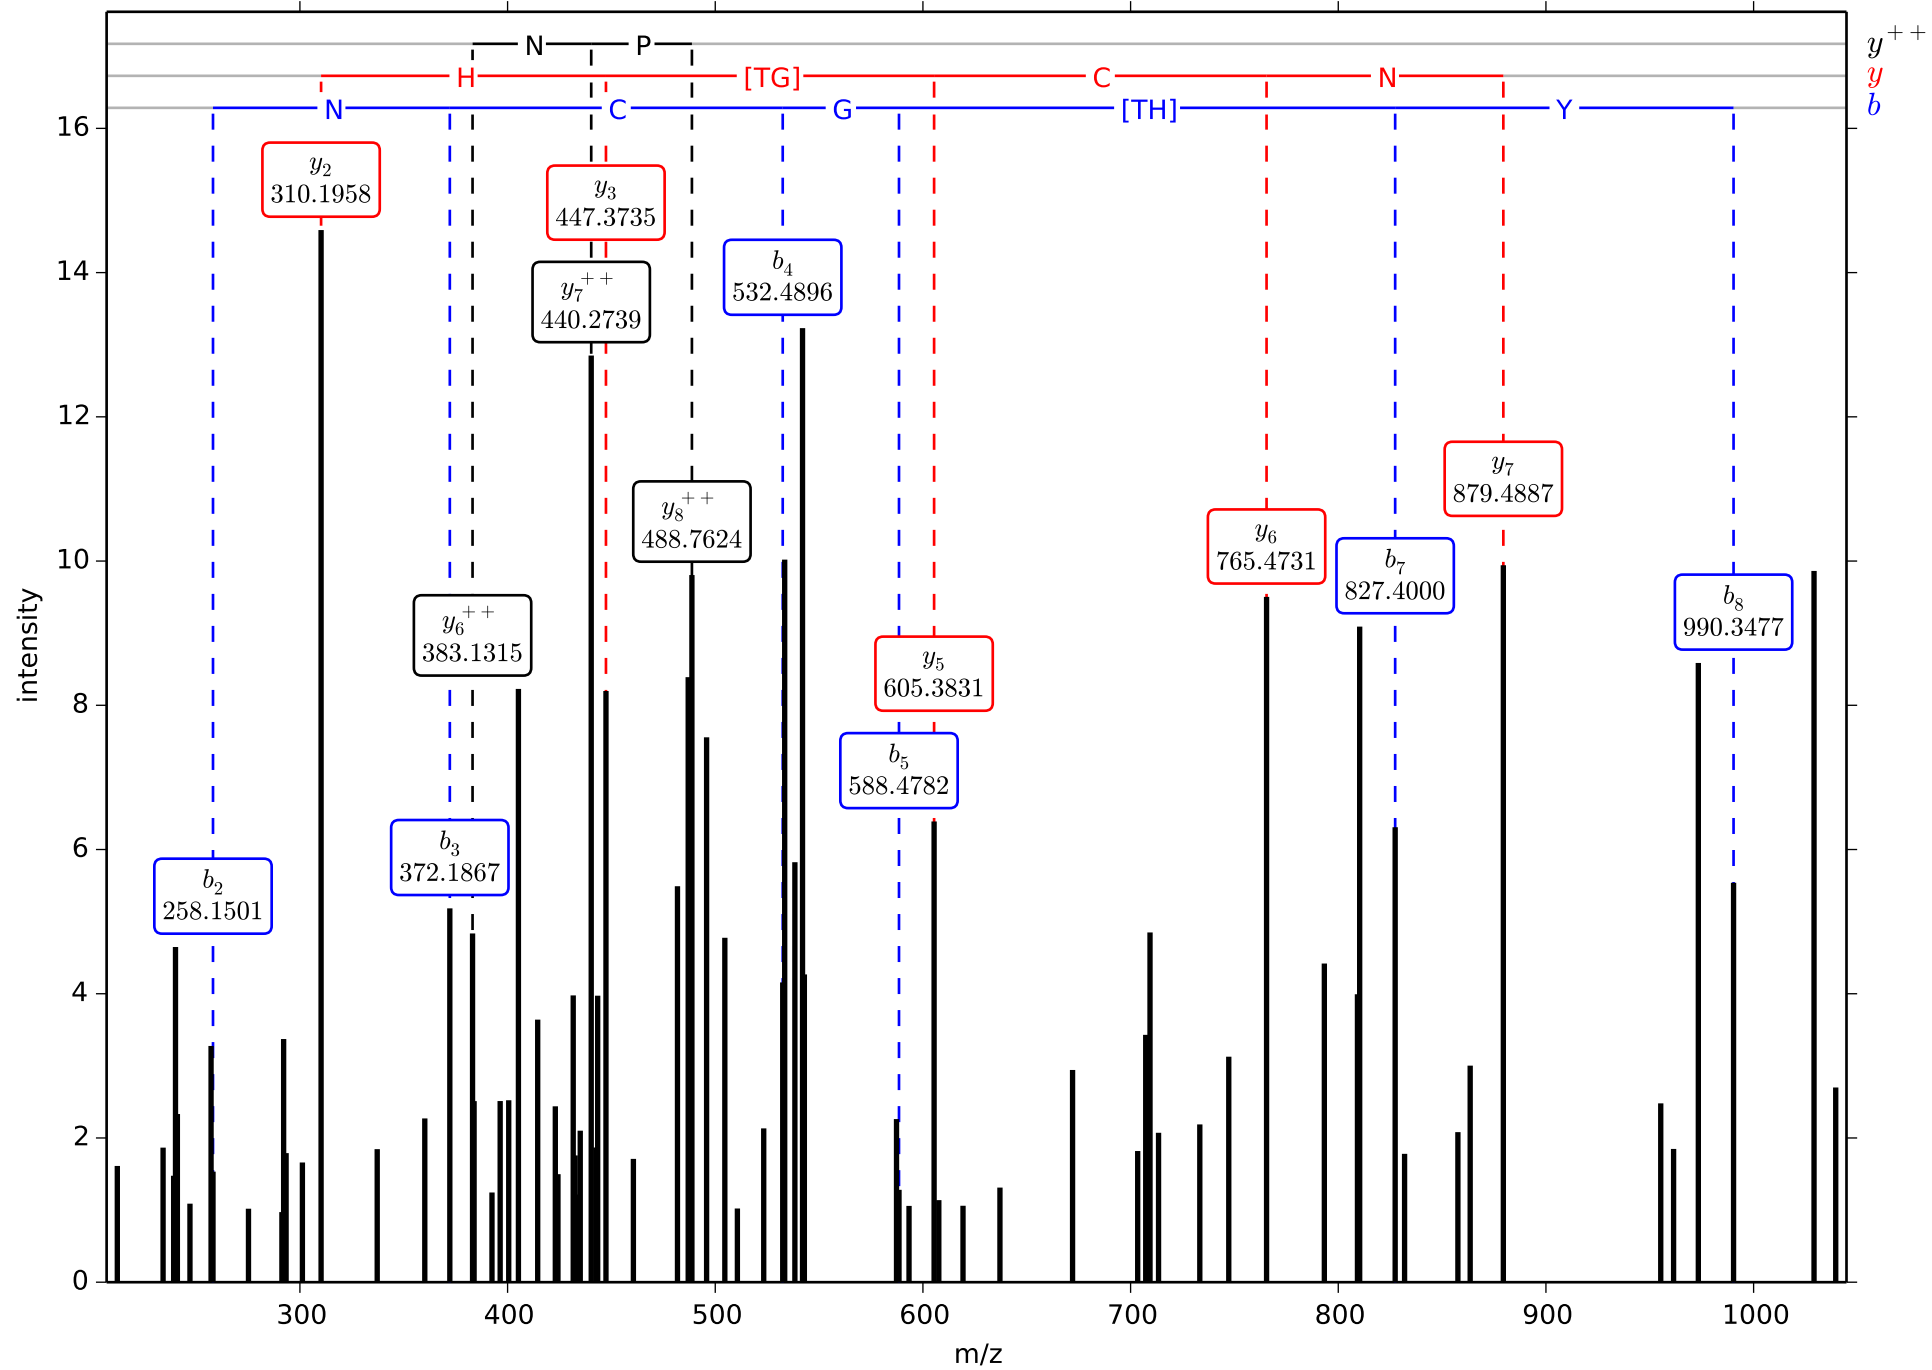

P09411 : GCITIIGGGDTATCCA

parent: 877.893810,2+

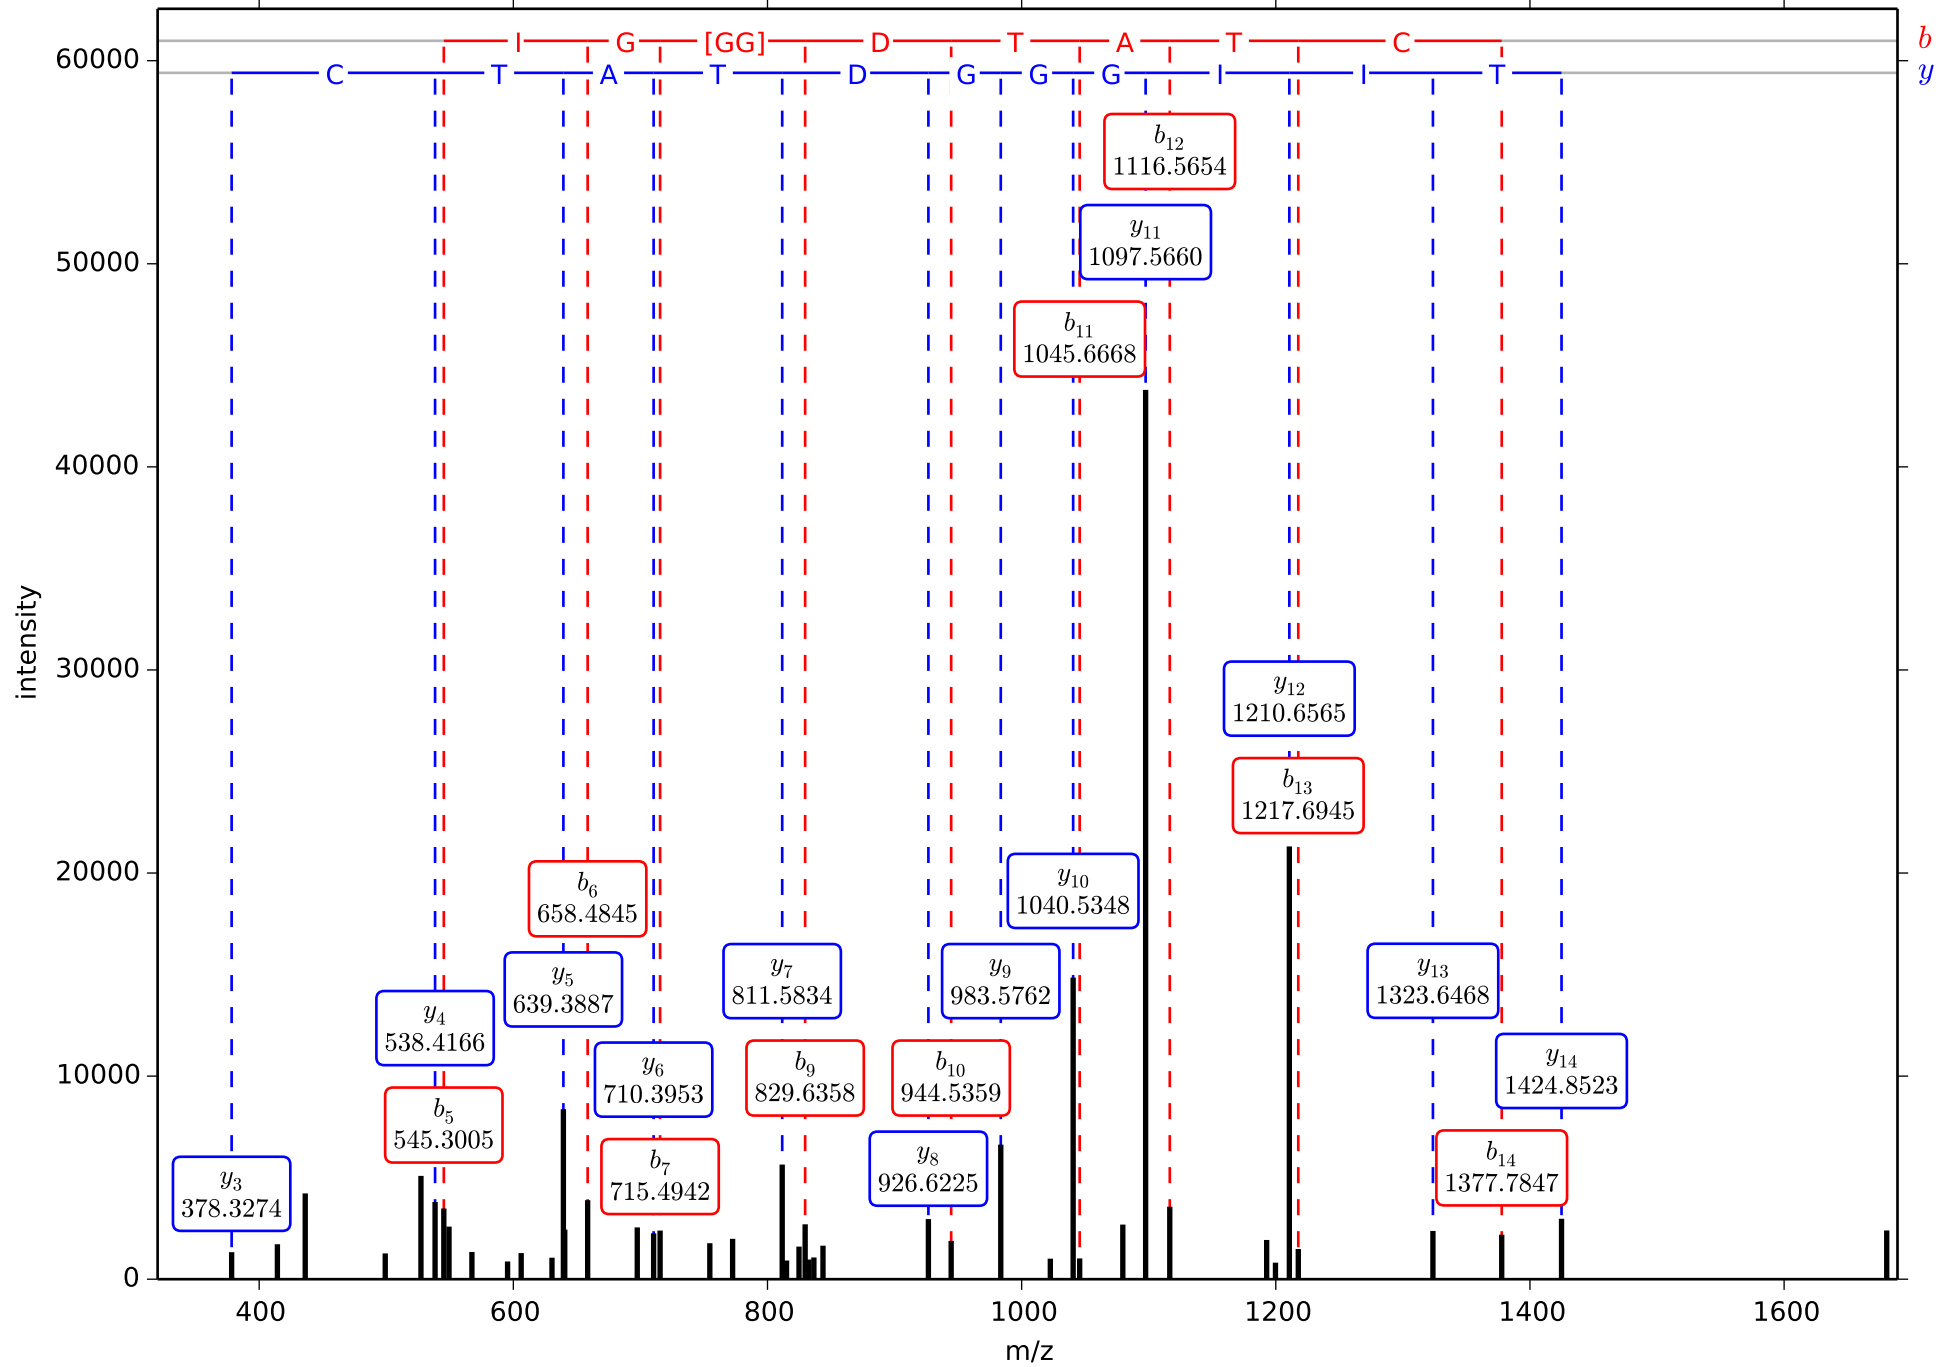



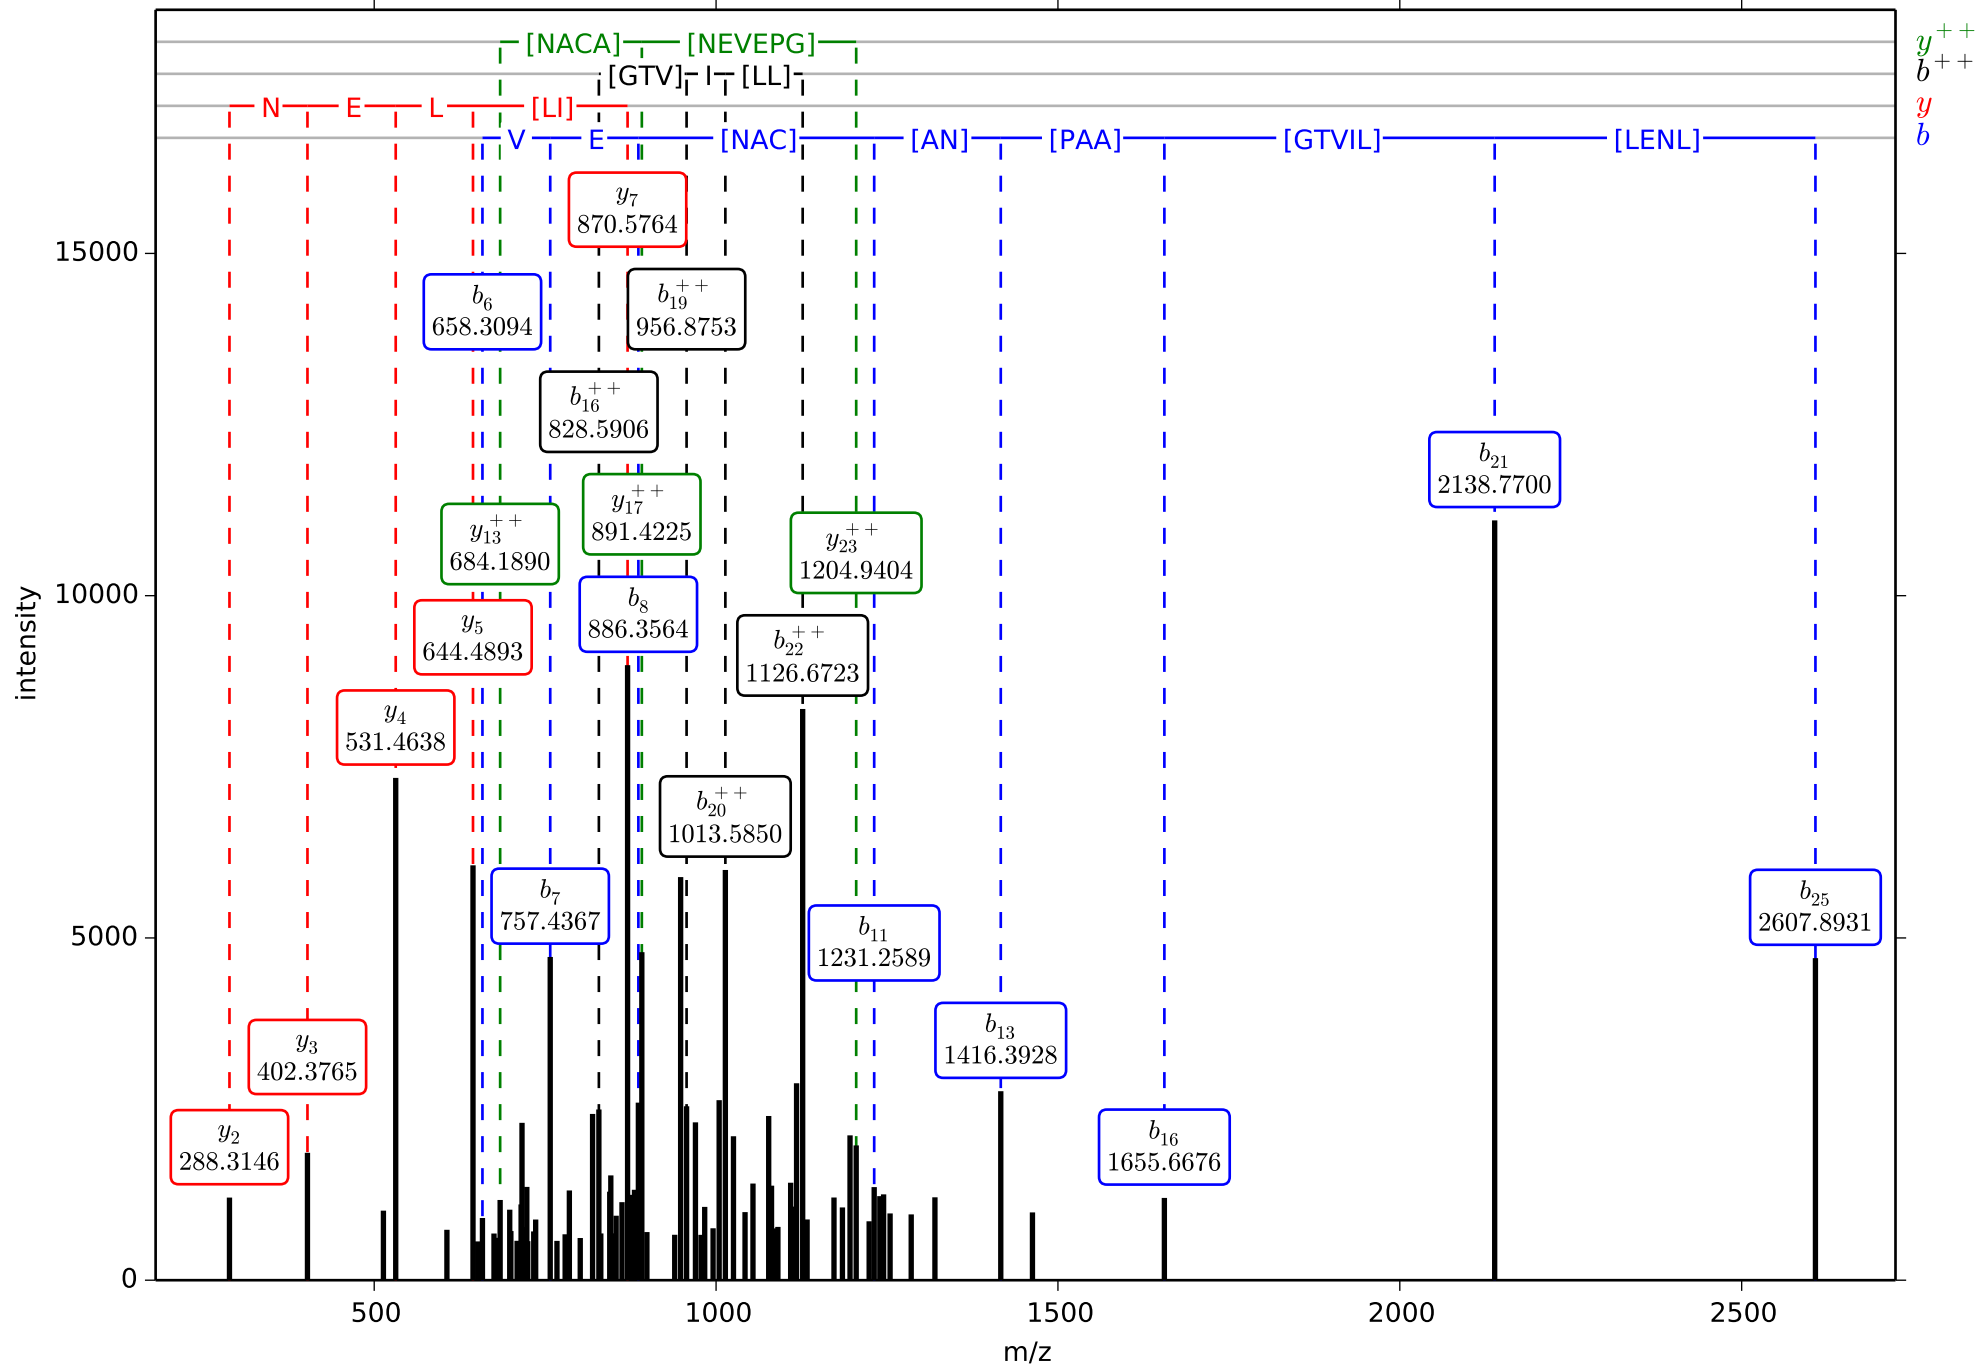

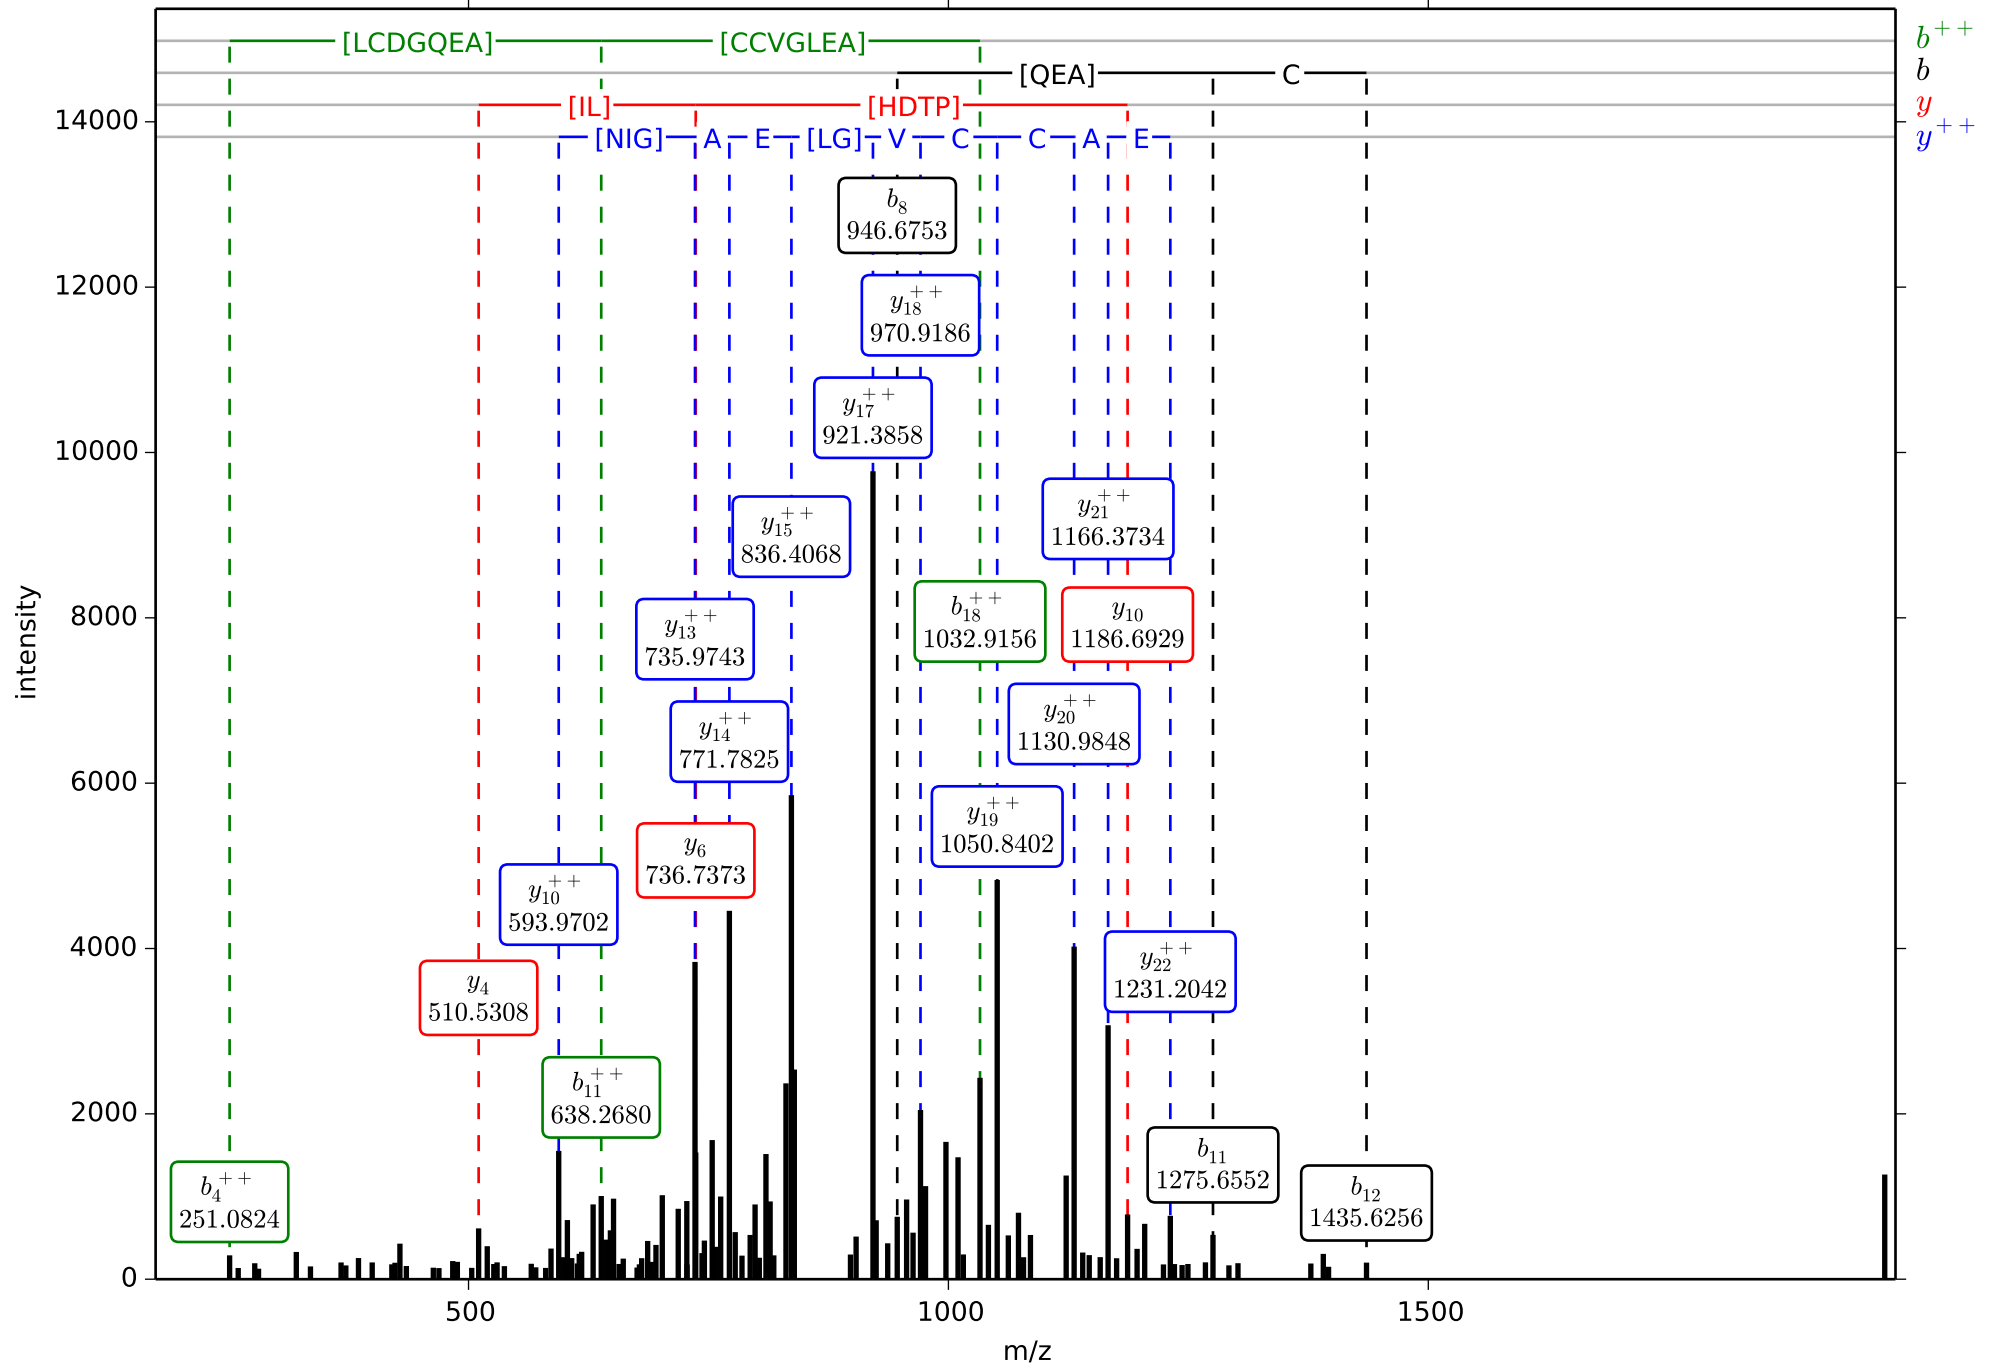

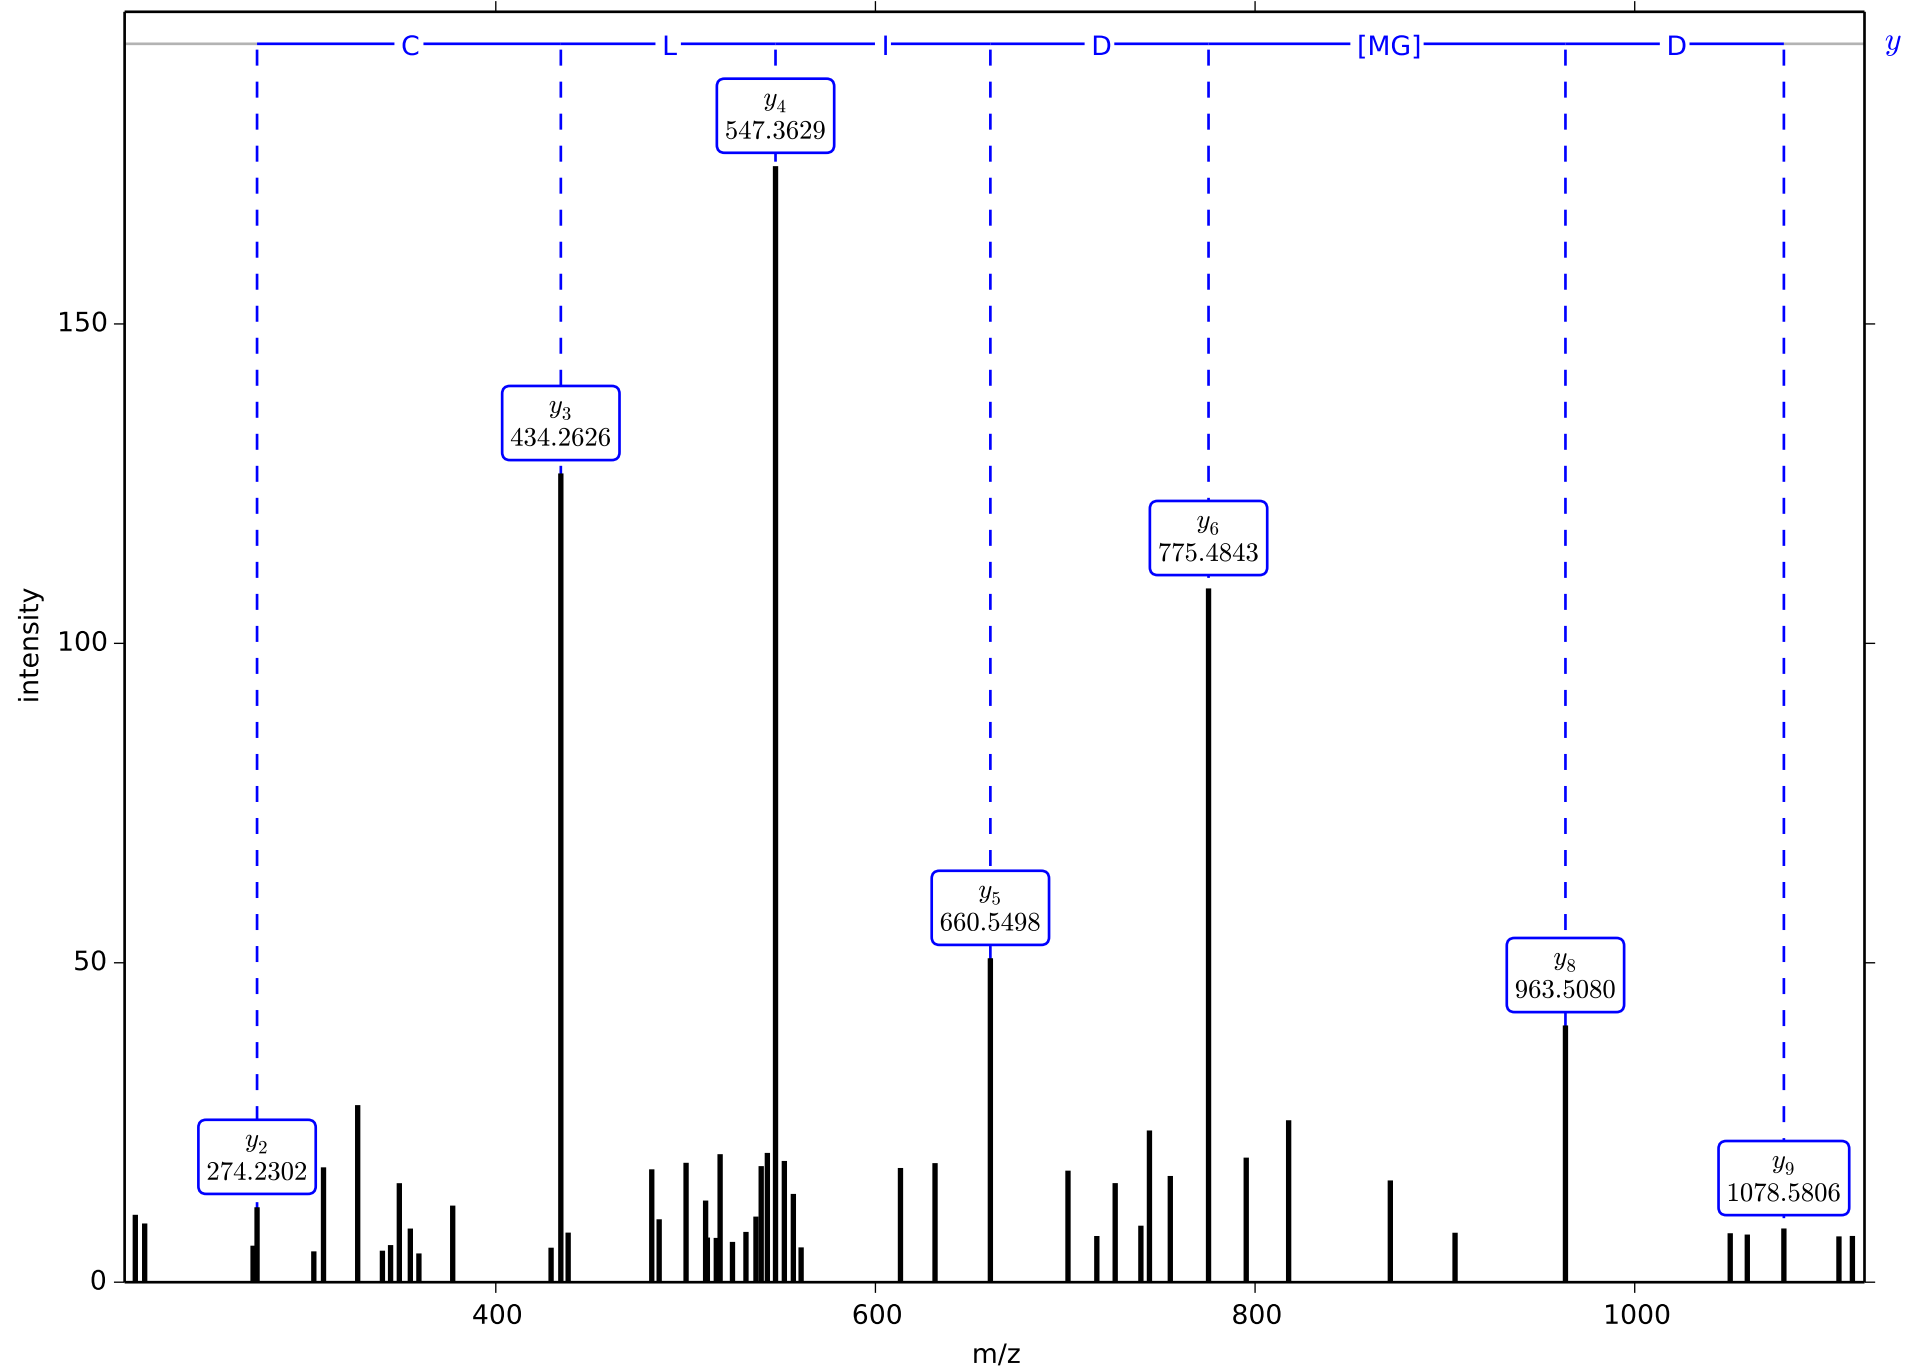

P48962 : YFAGNLSGGAAGATSLCFVYPLDFAR

parent: 1398.696200,2+

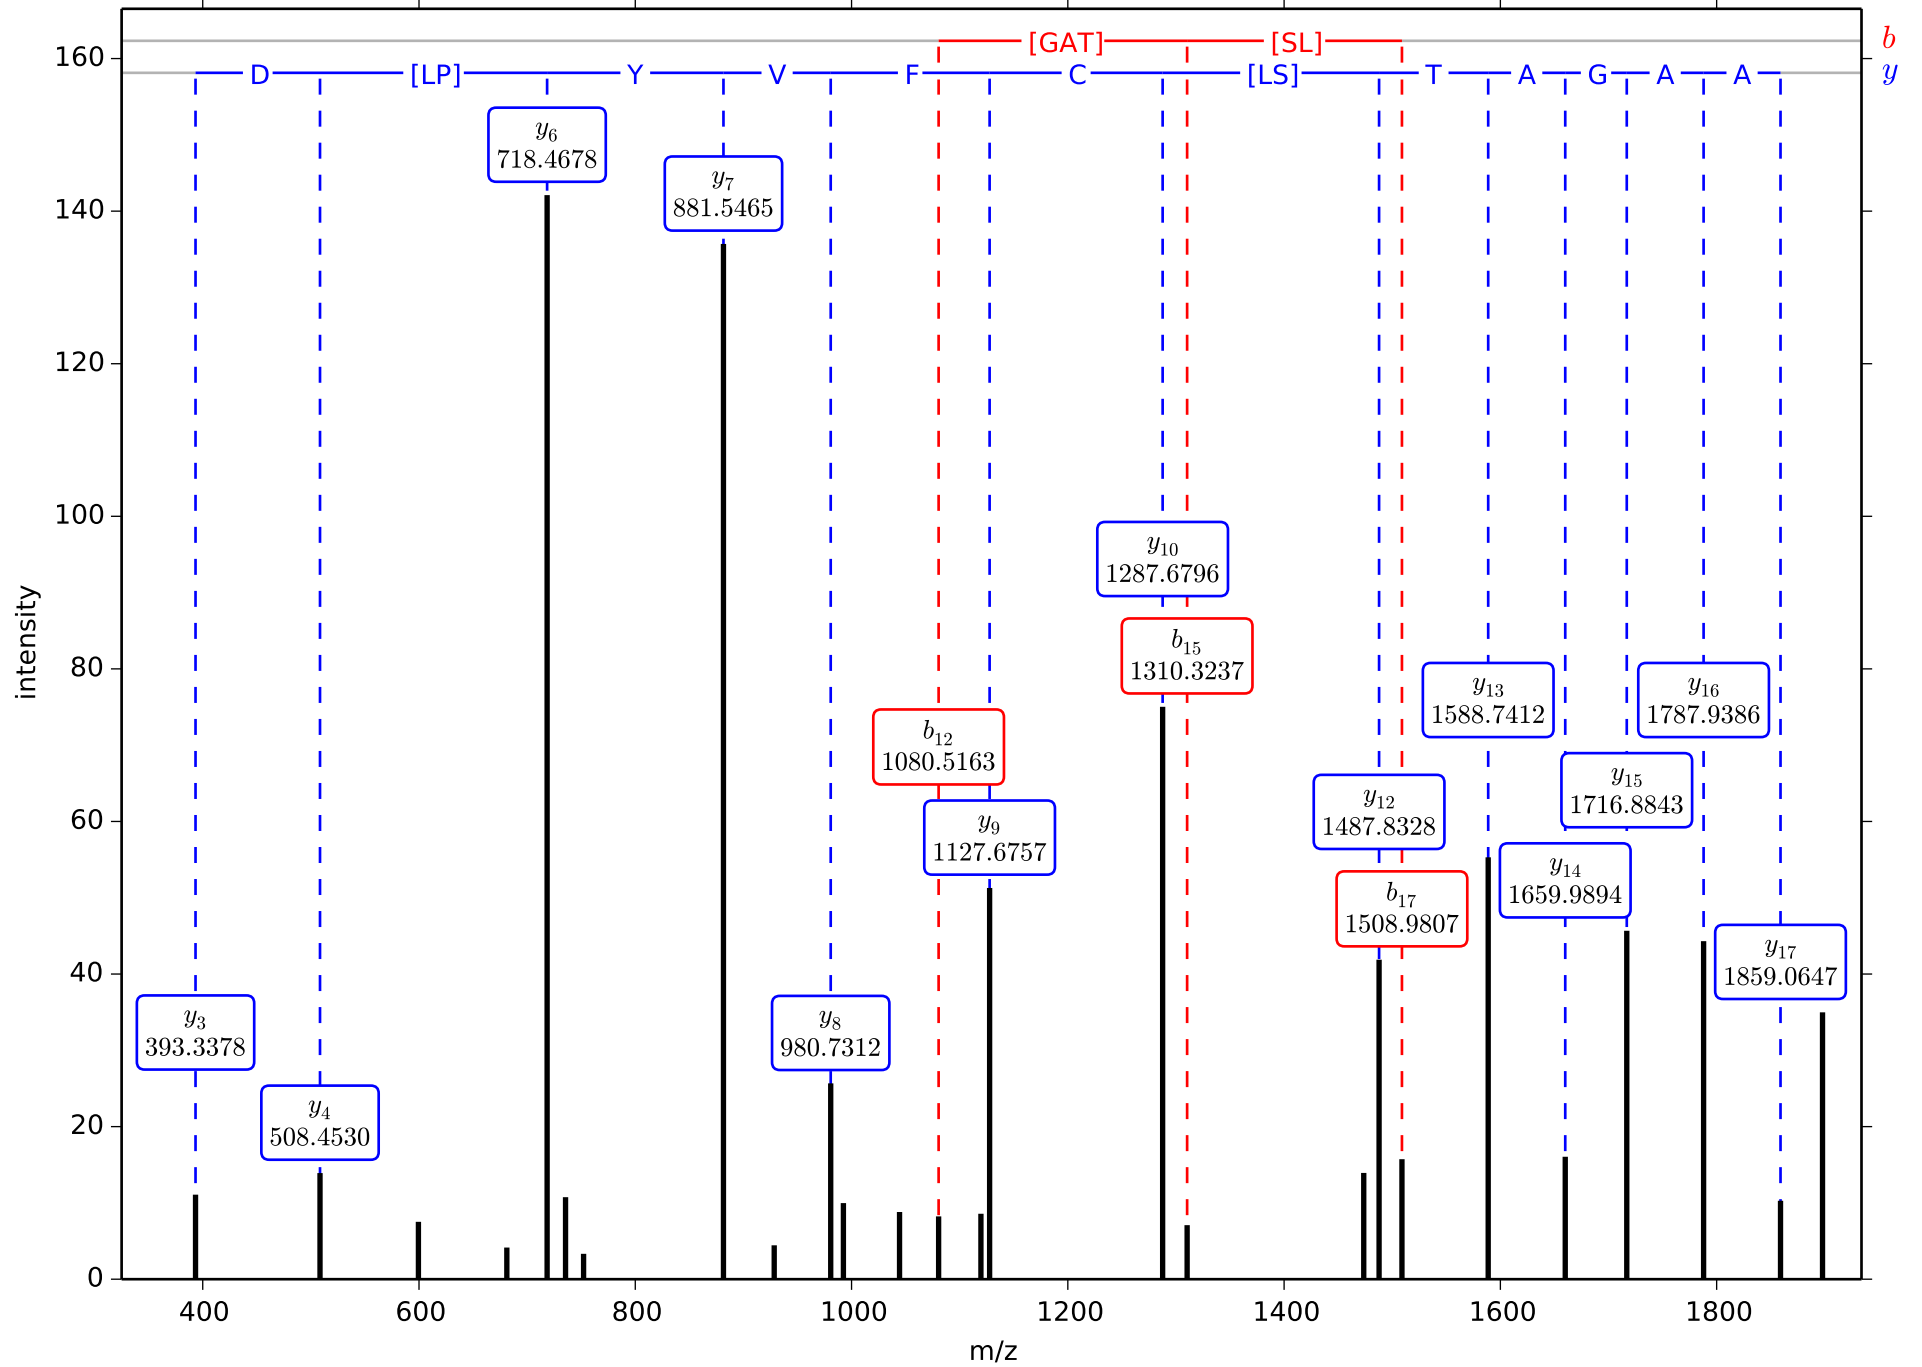

P48962 : GADIMYTGTLDCWR

parent: 829.869030,2+

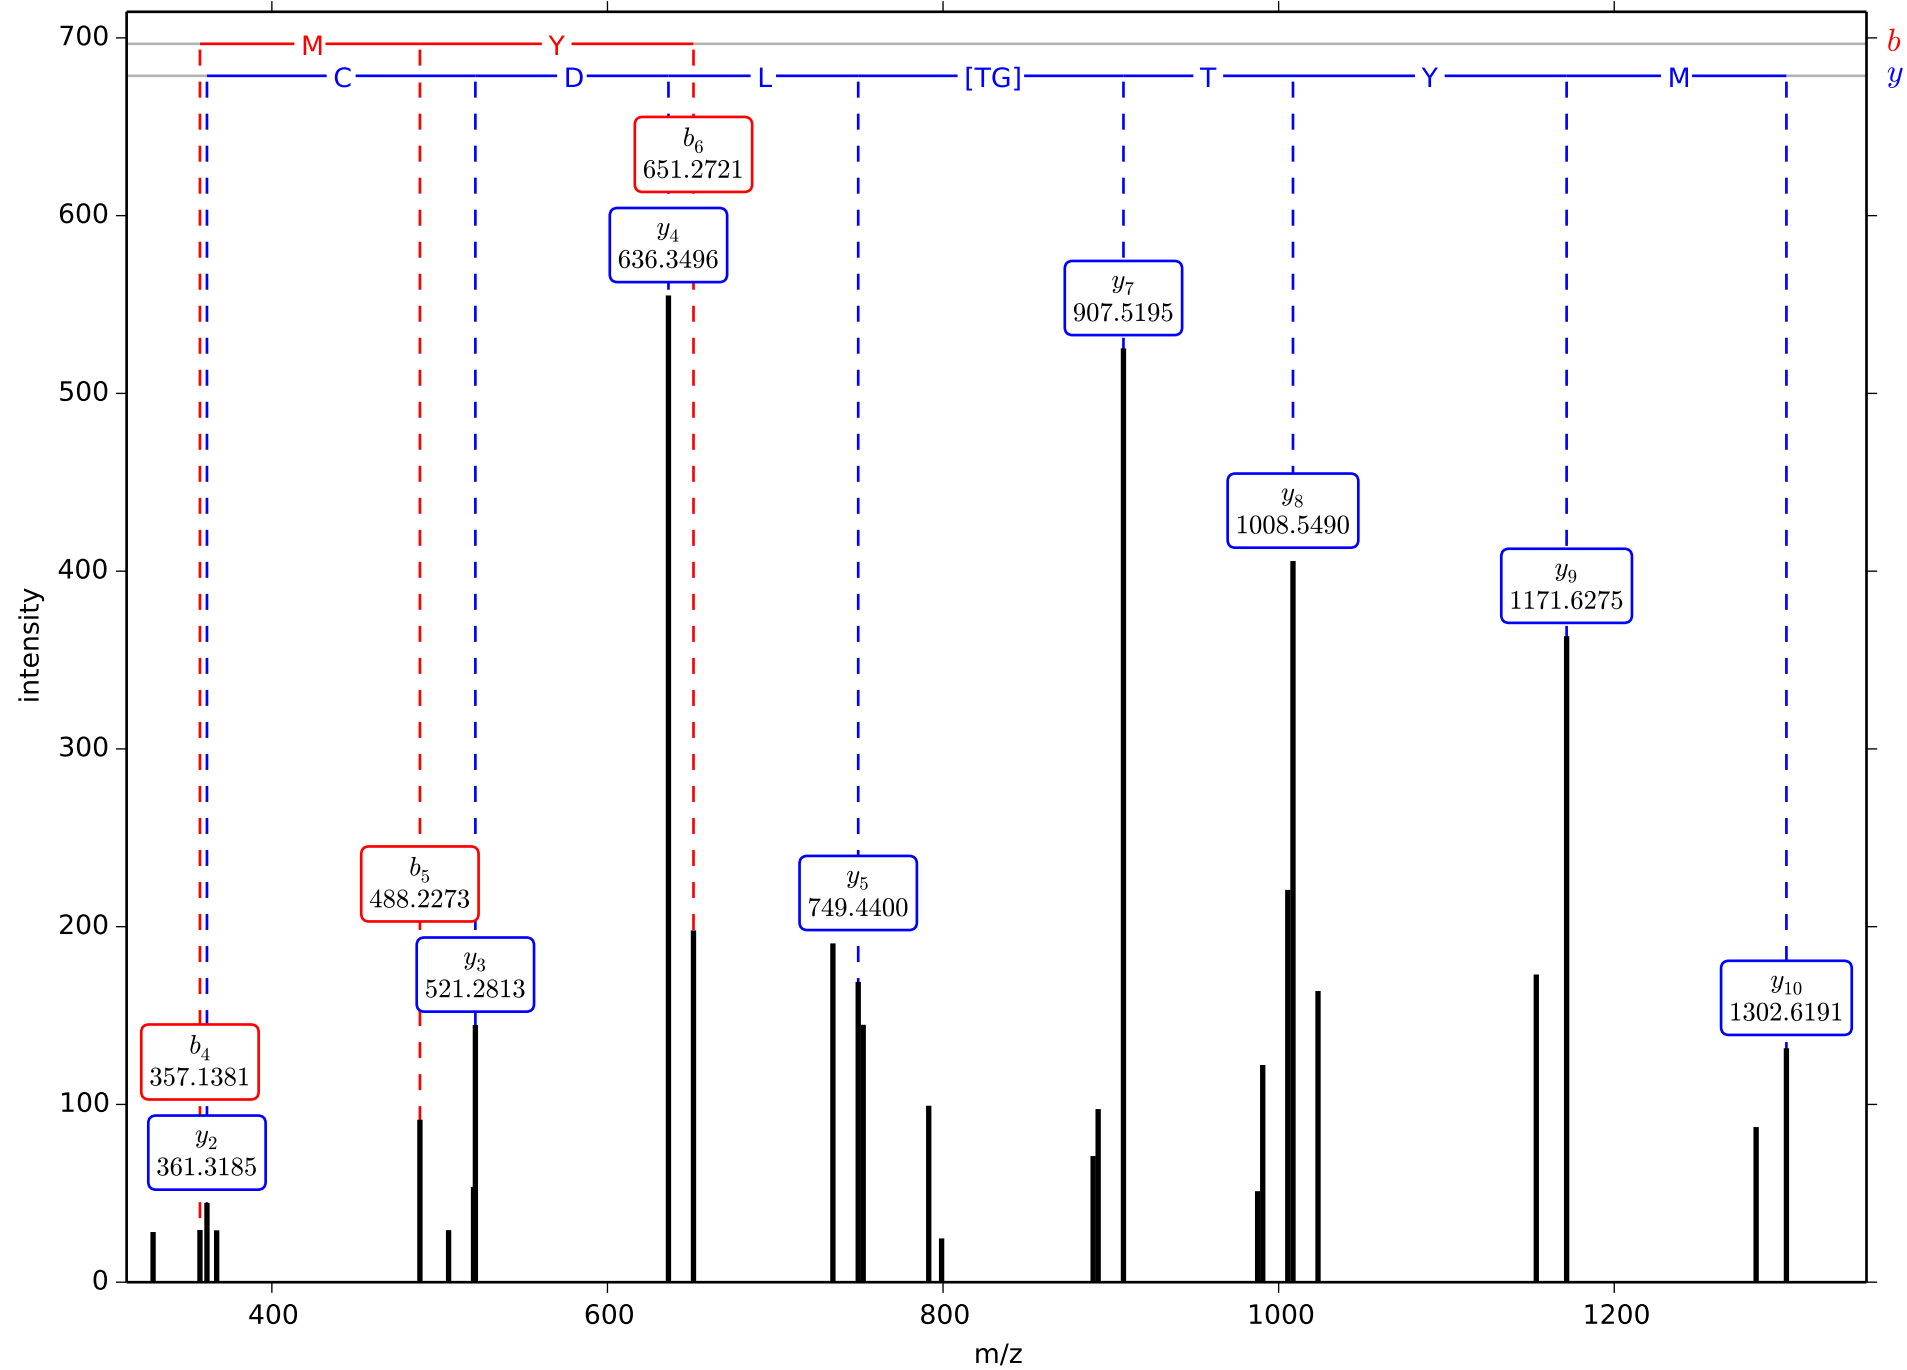

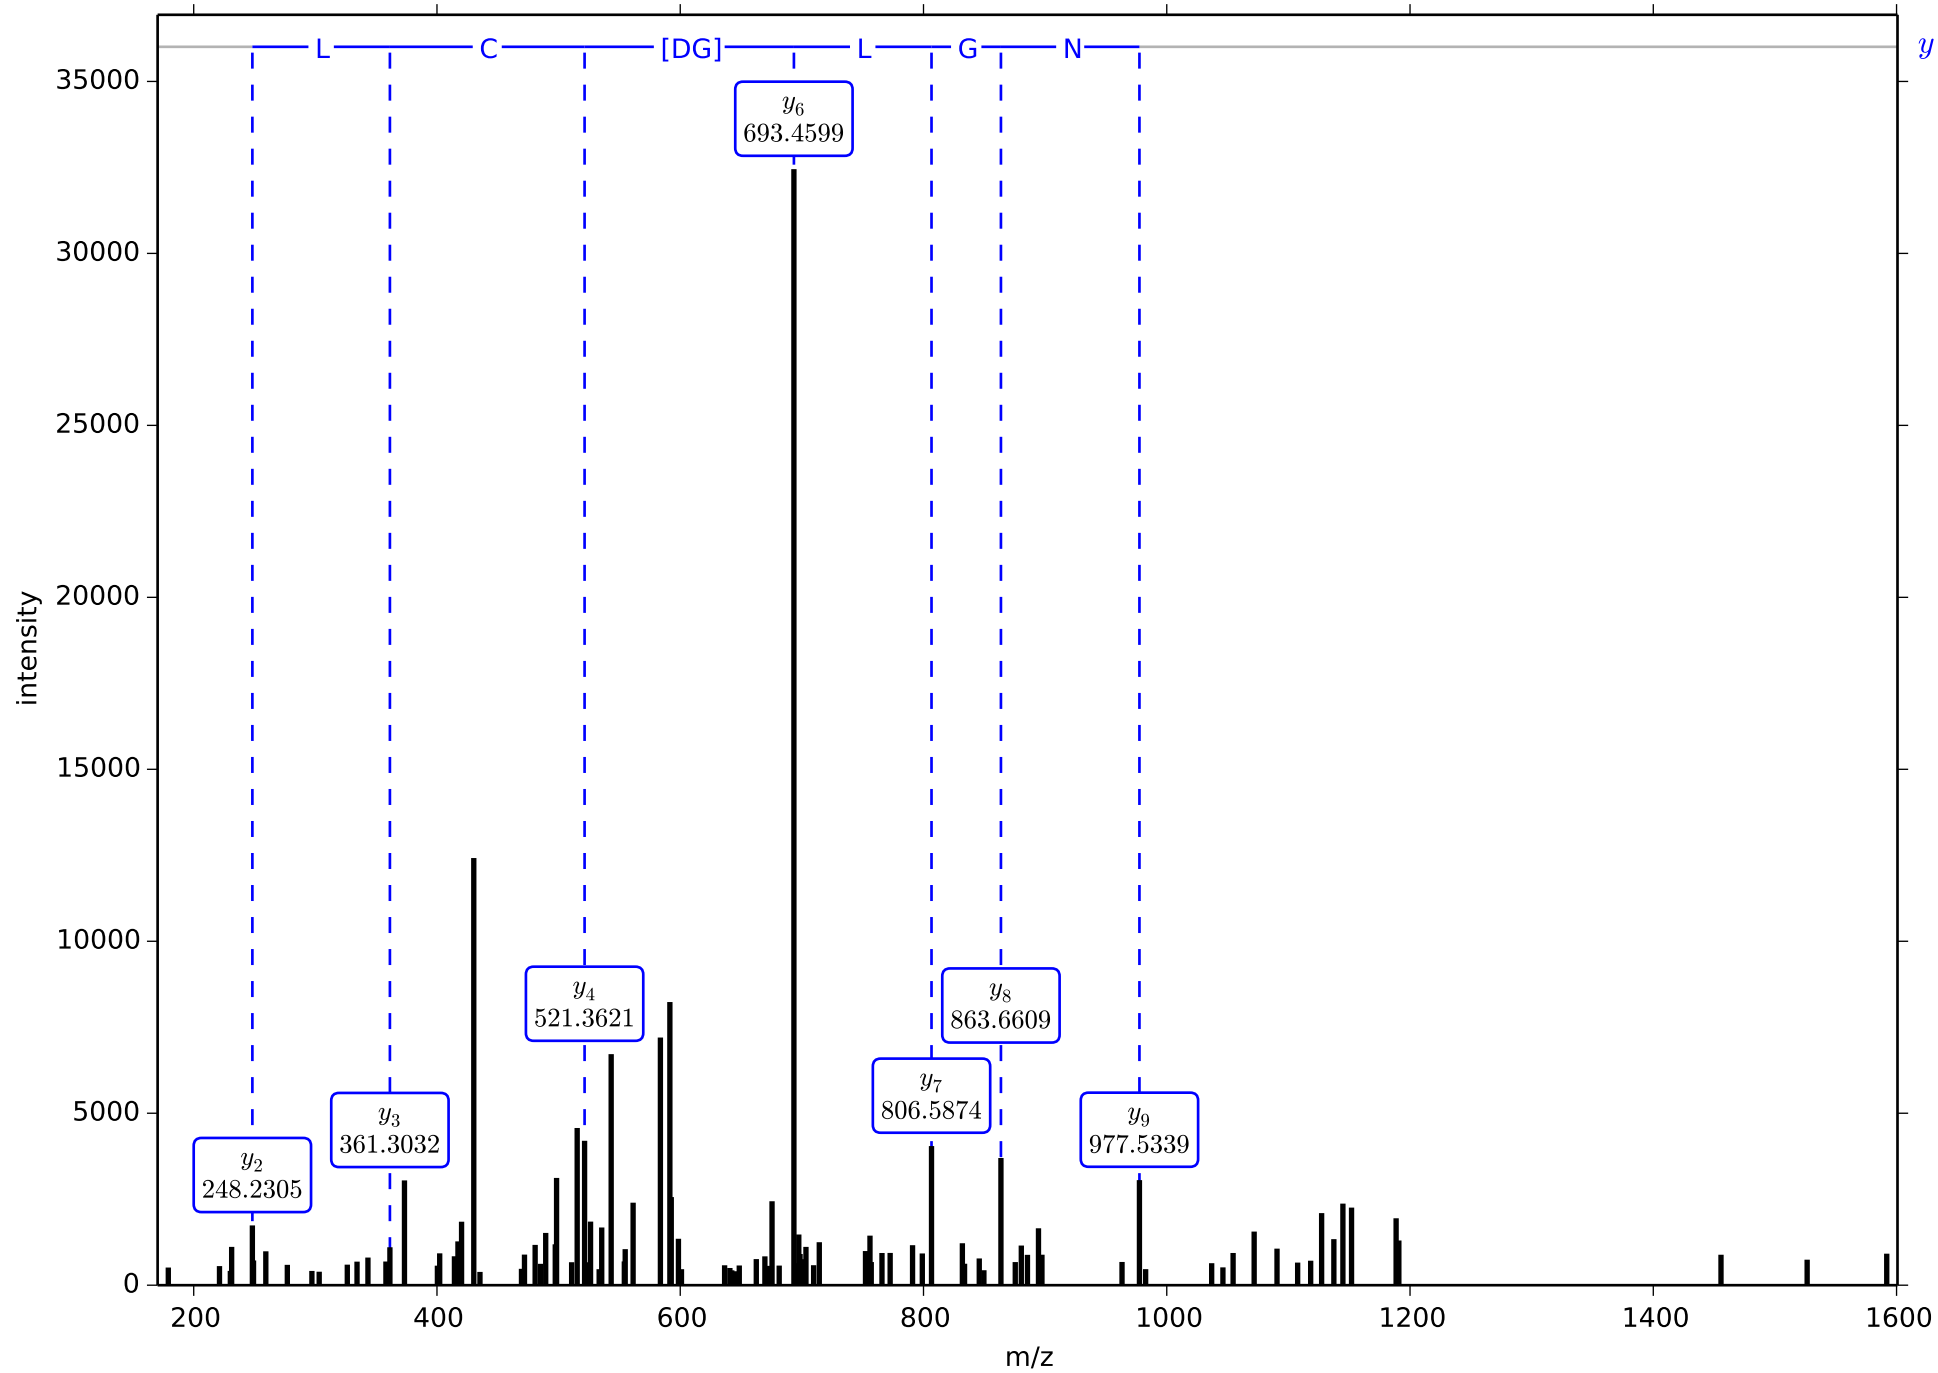

P17751 : IYGGSVTGATCK

parent: 663.841720,2+

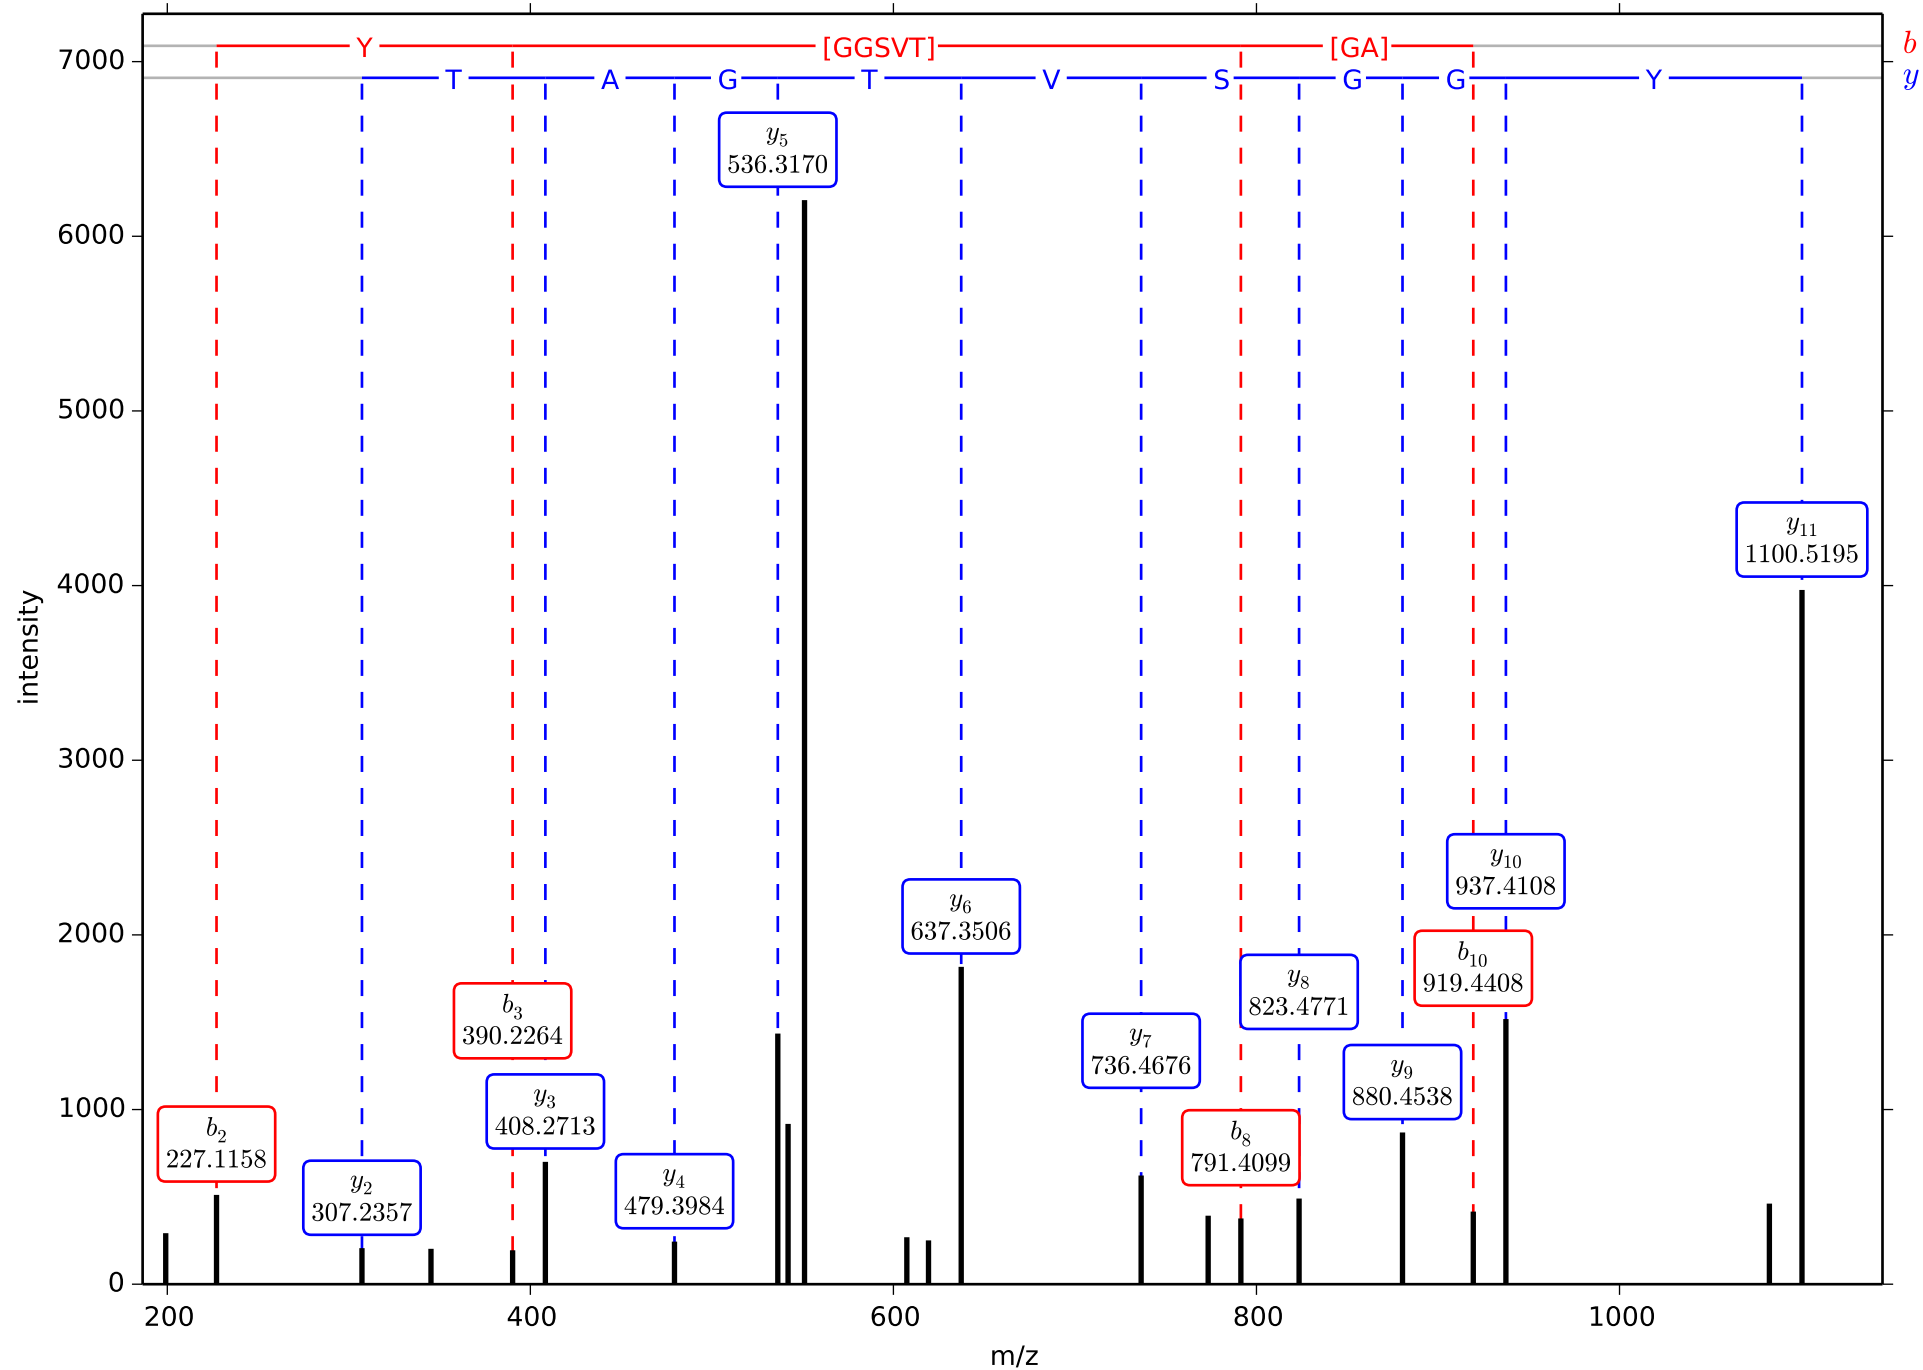

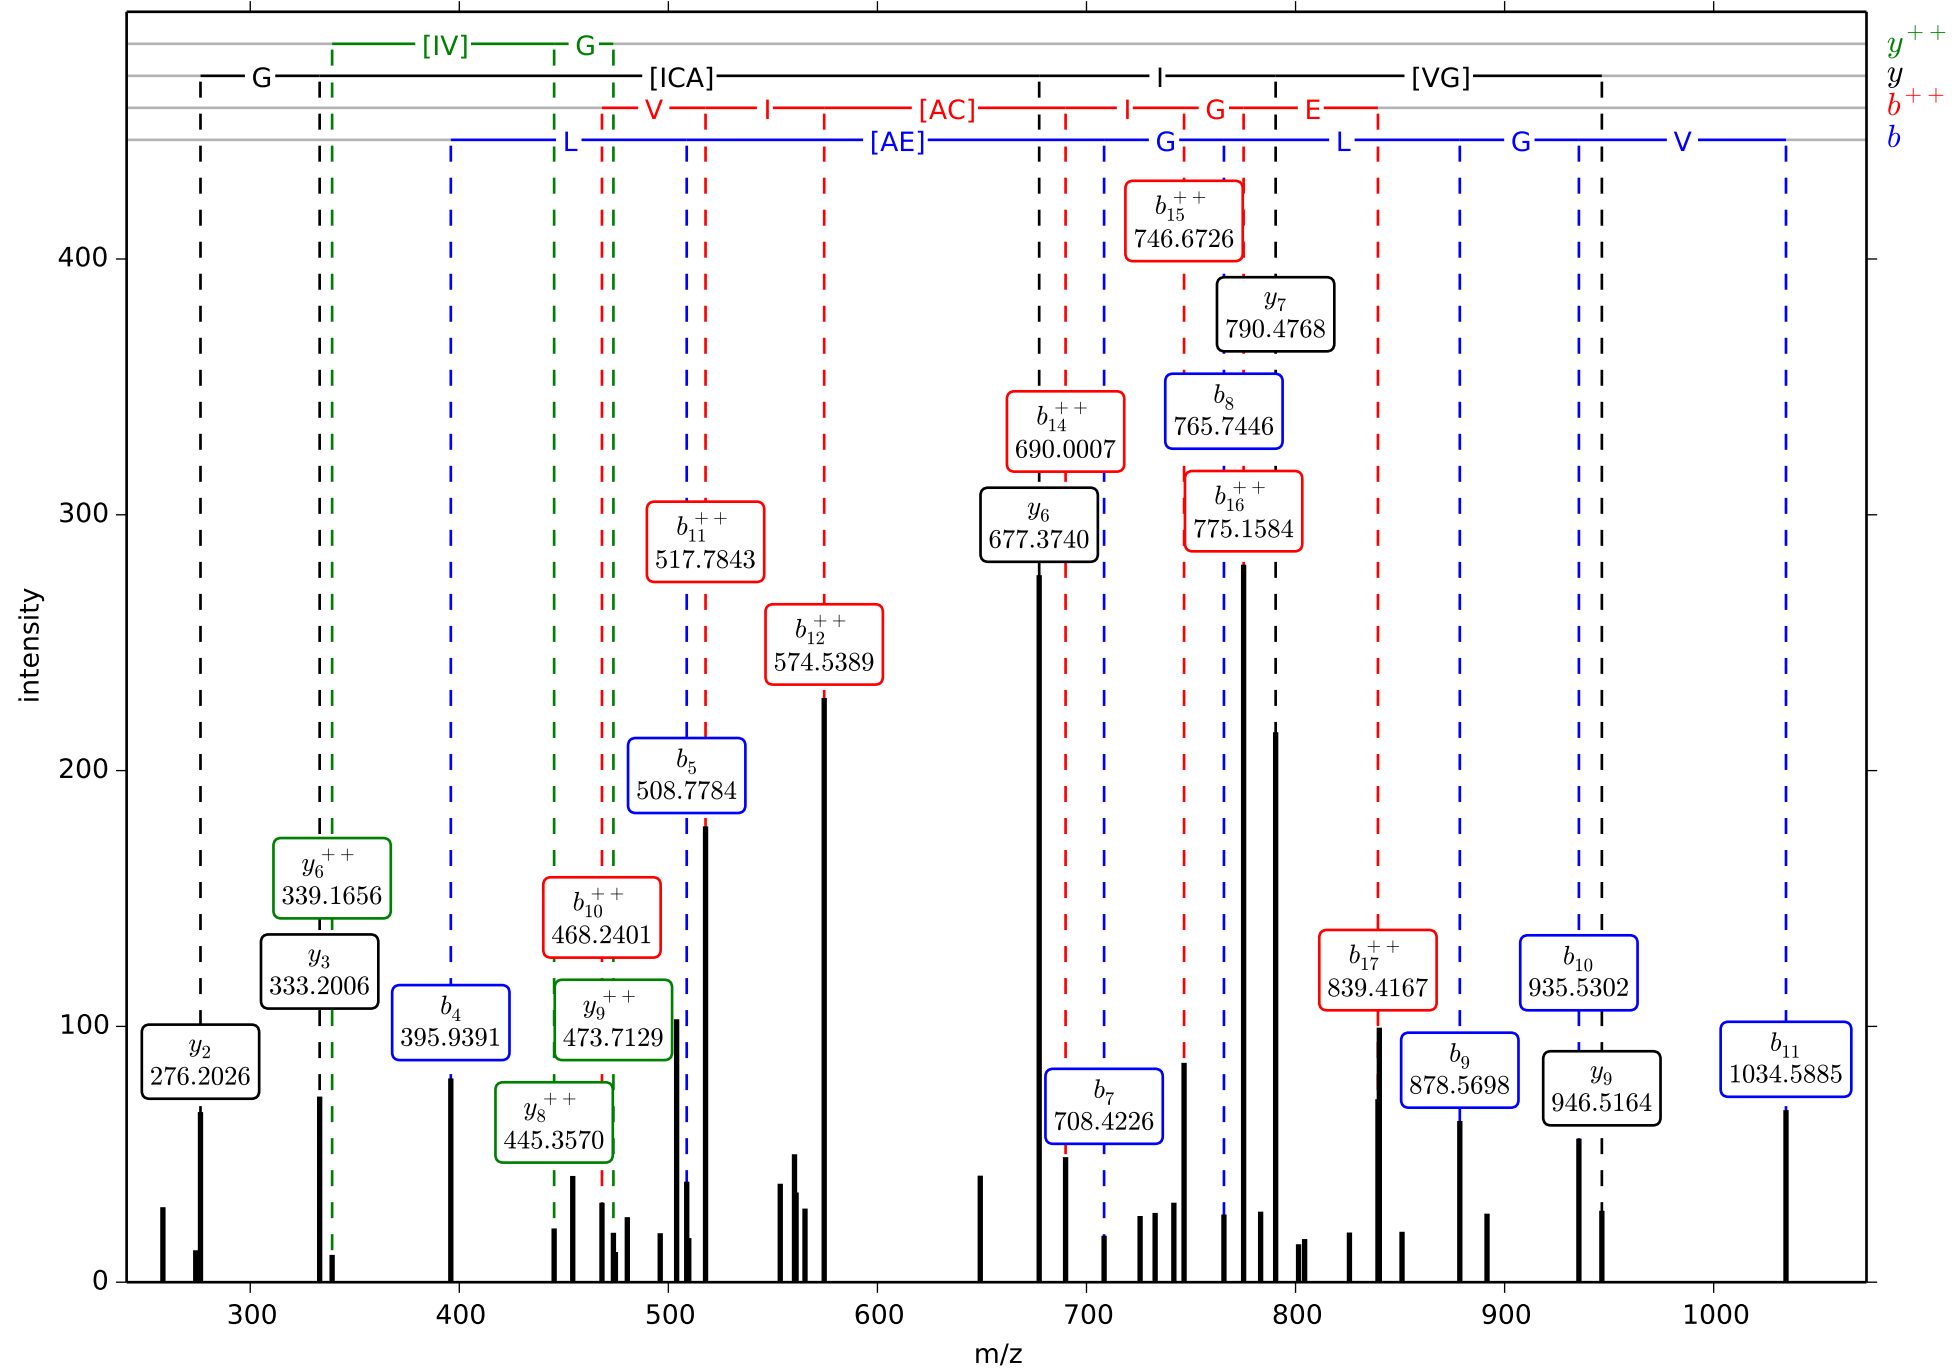



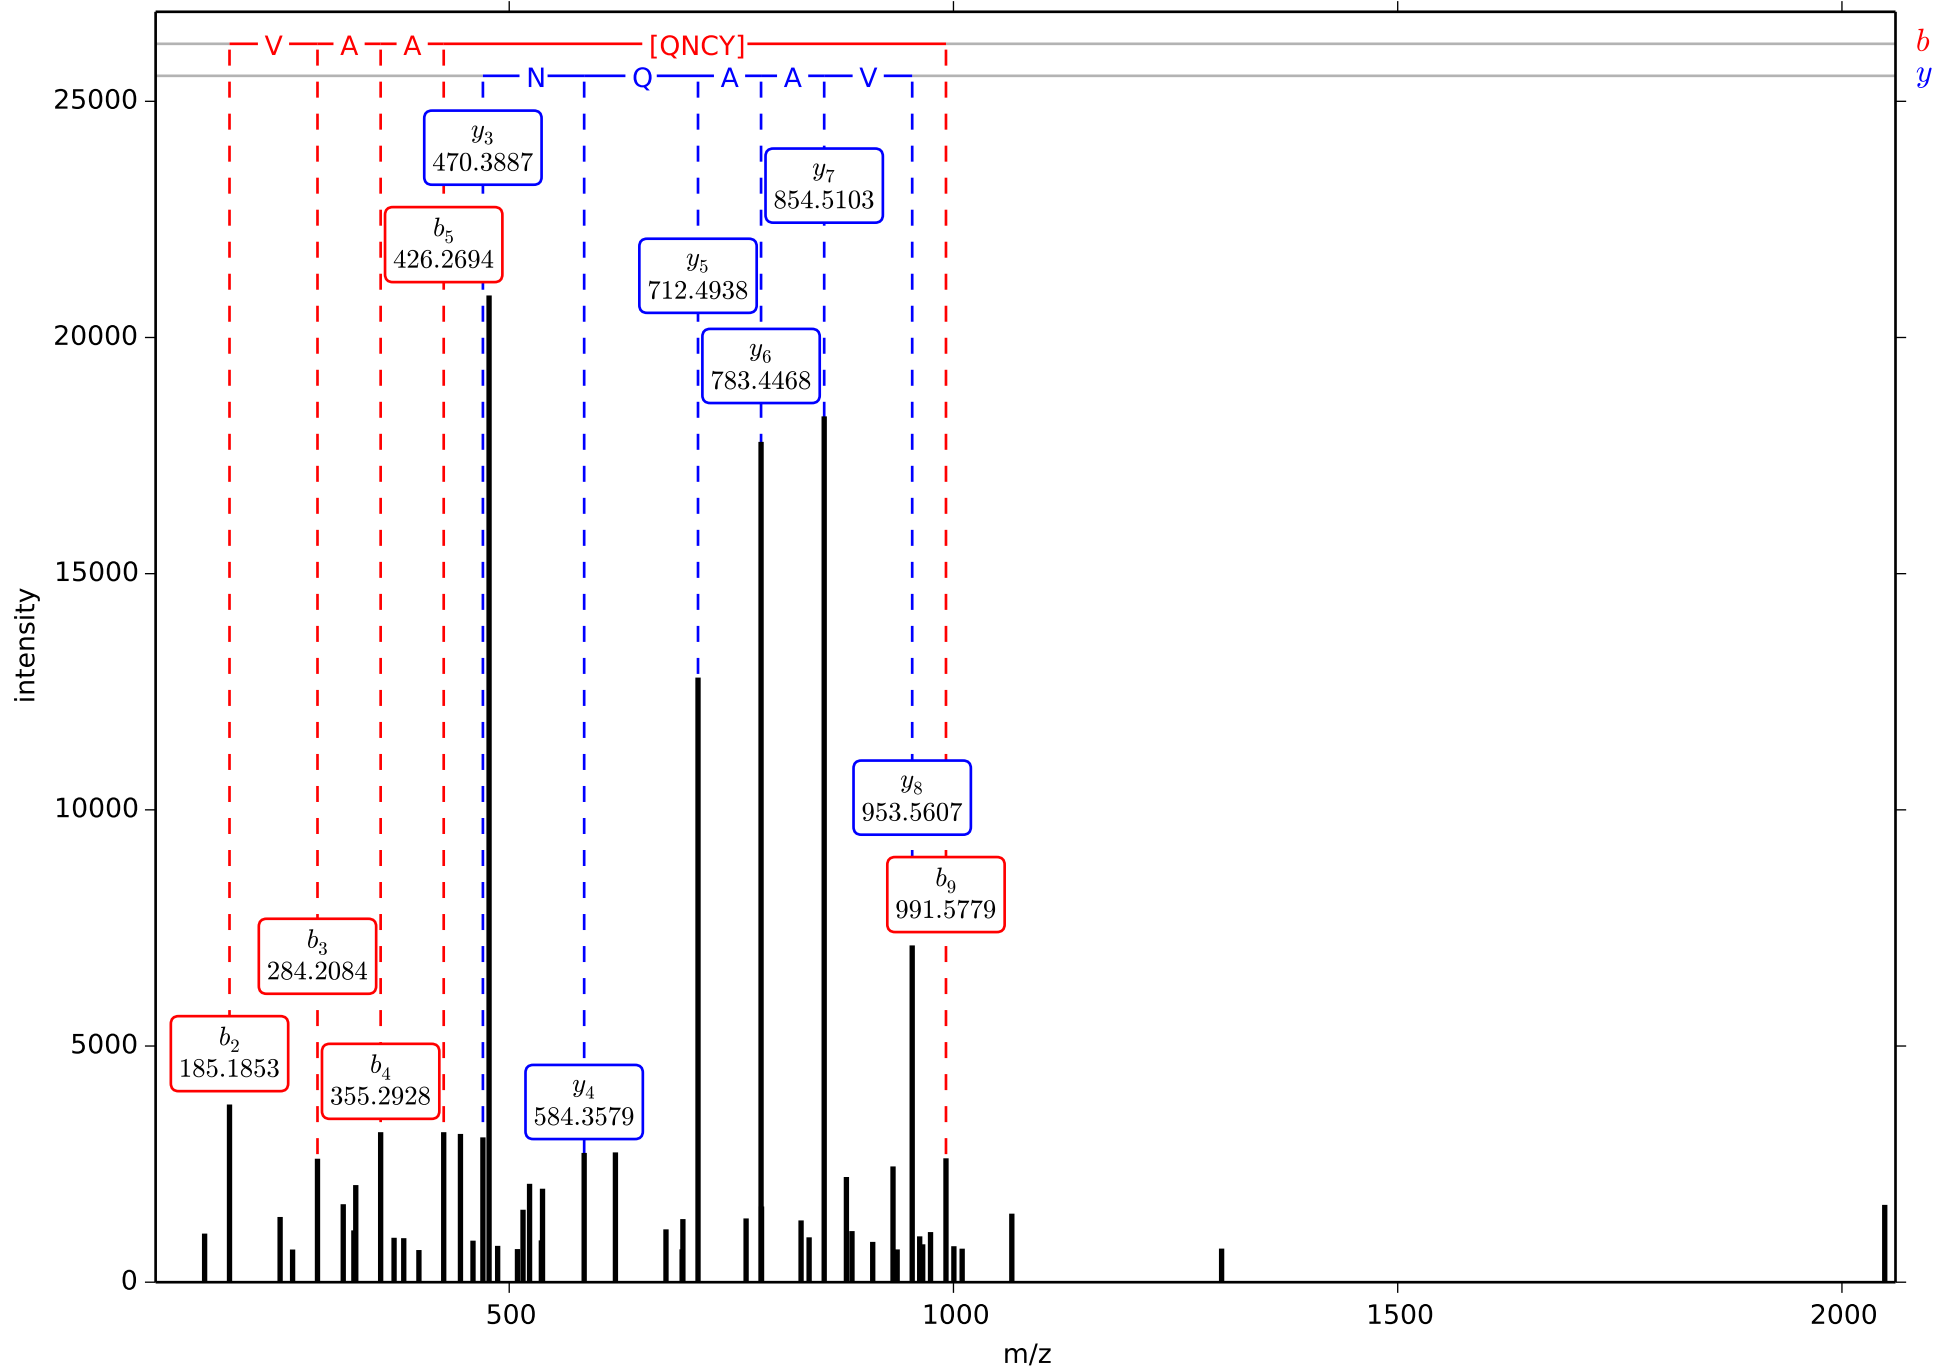

Q9R0P9 : NEAIQAAHDSVAQEGQCR

parent: 992.425120,2+

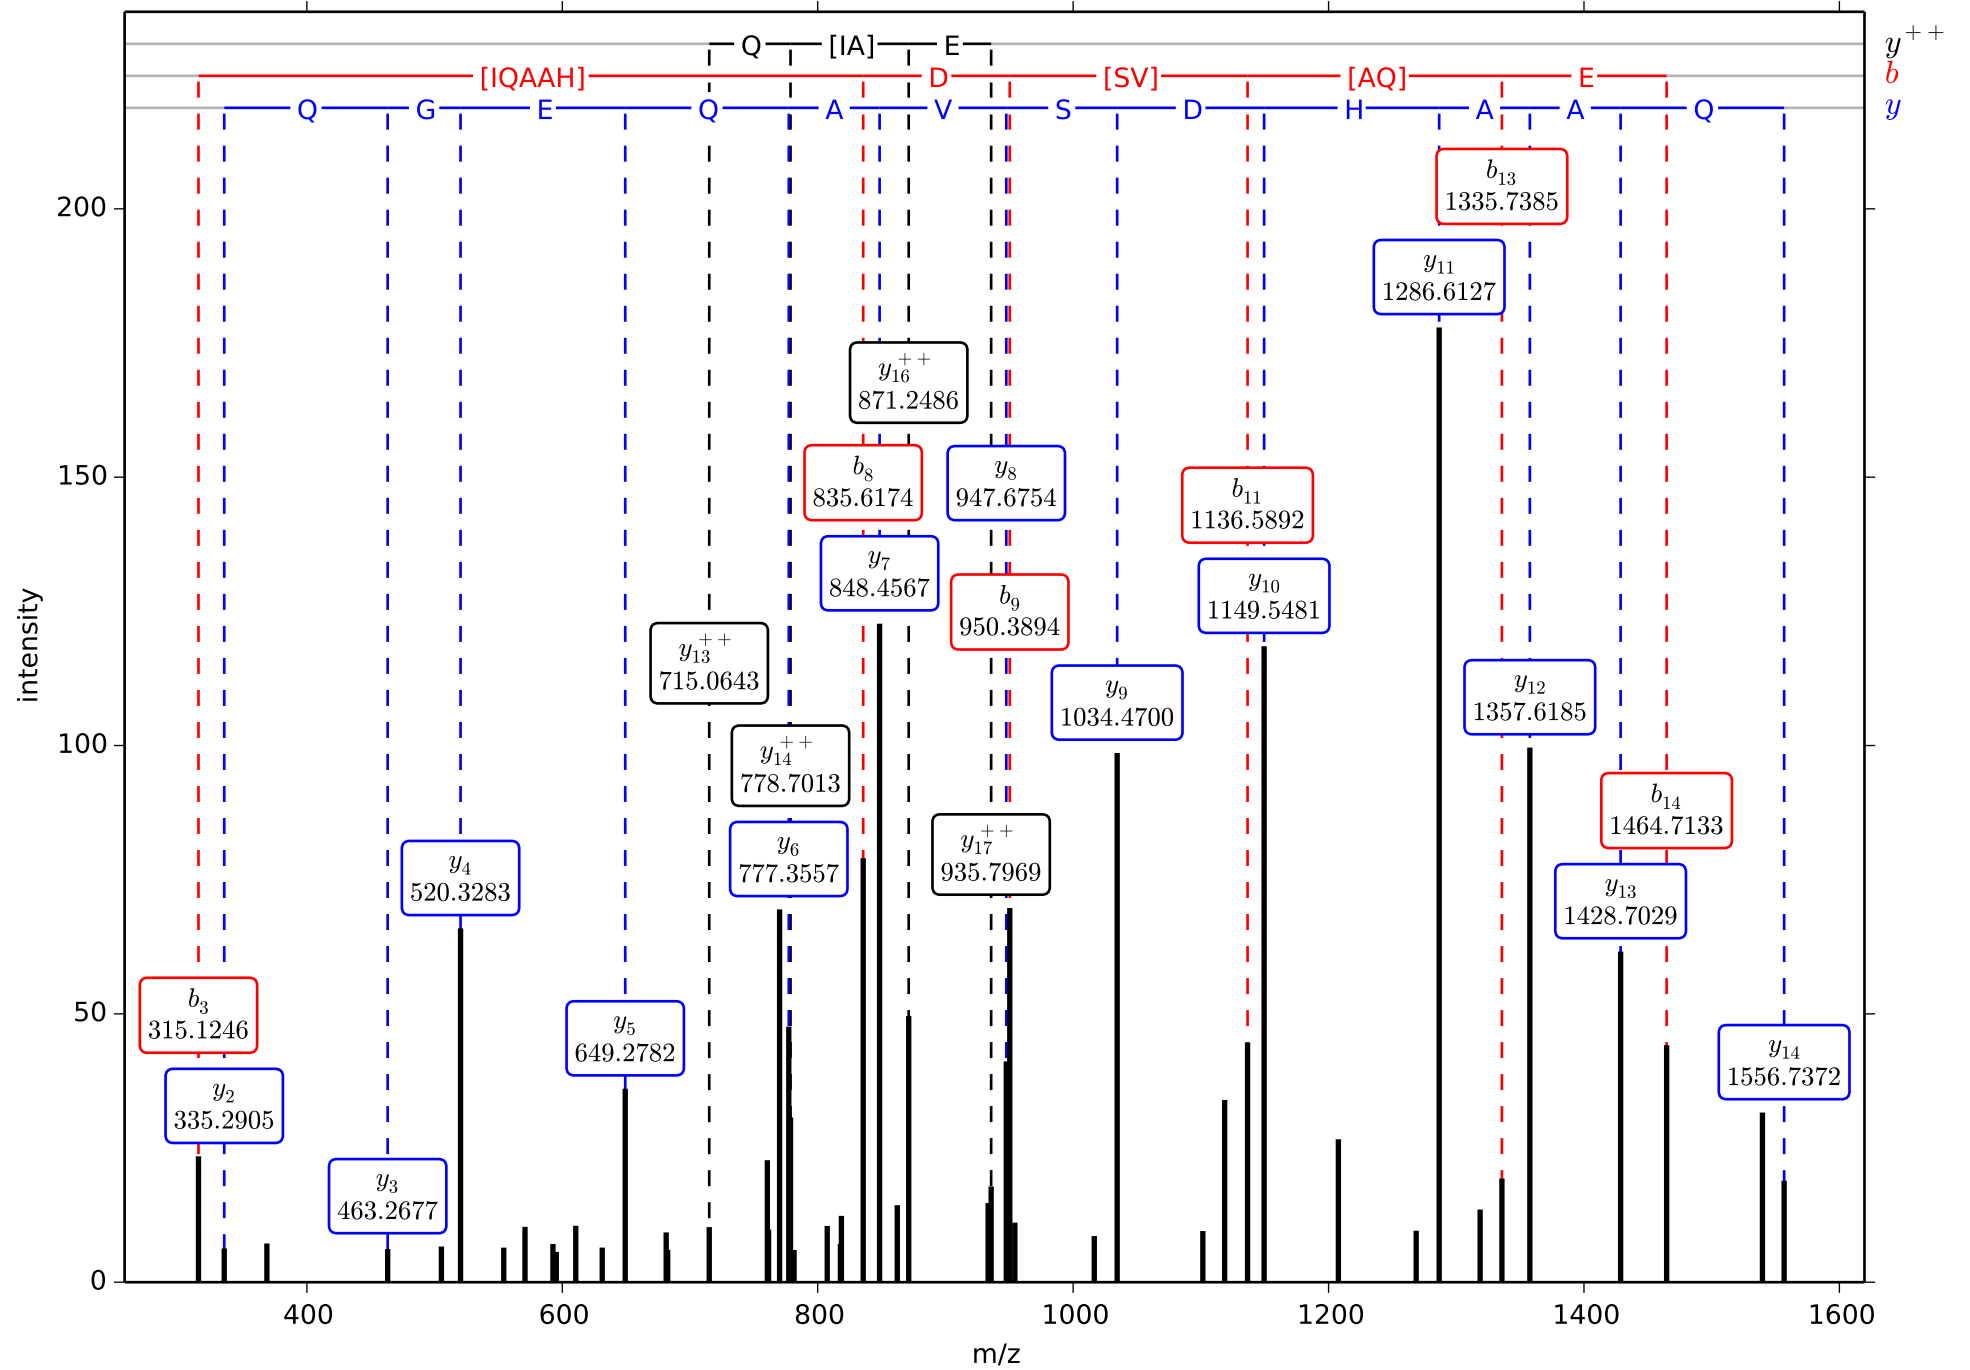

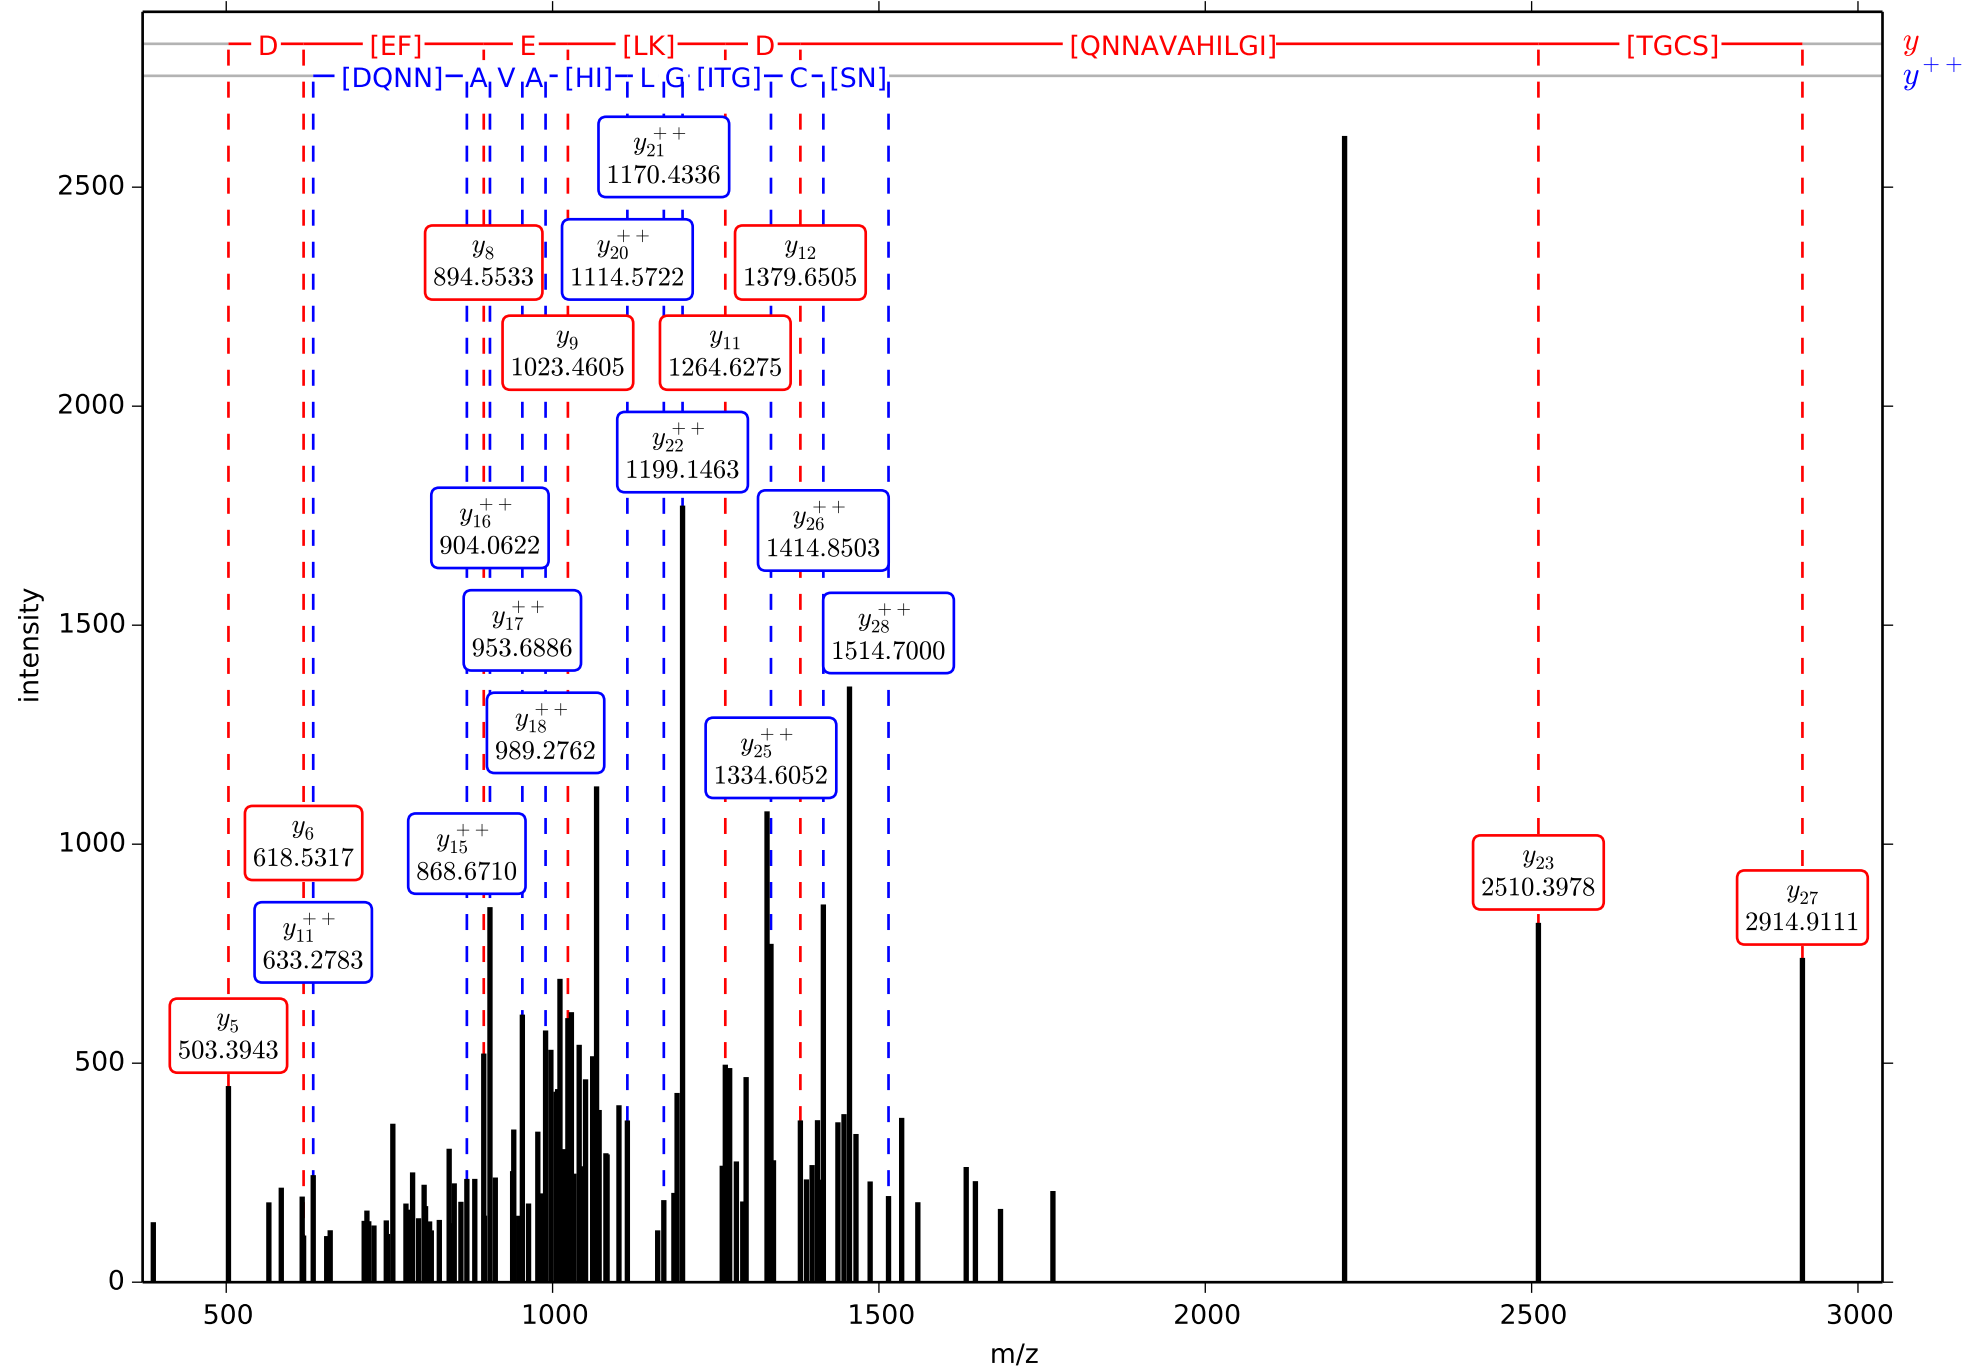

Q9R0P9 : FSAVALCK

parent: 448.238820,2+

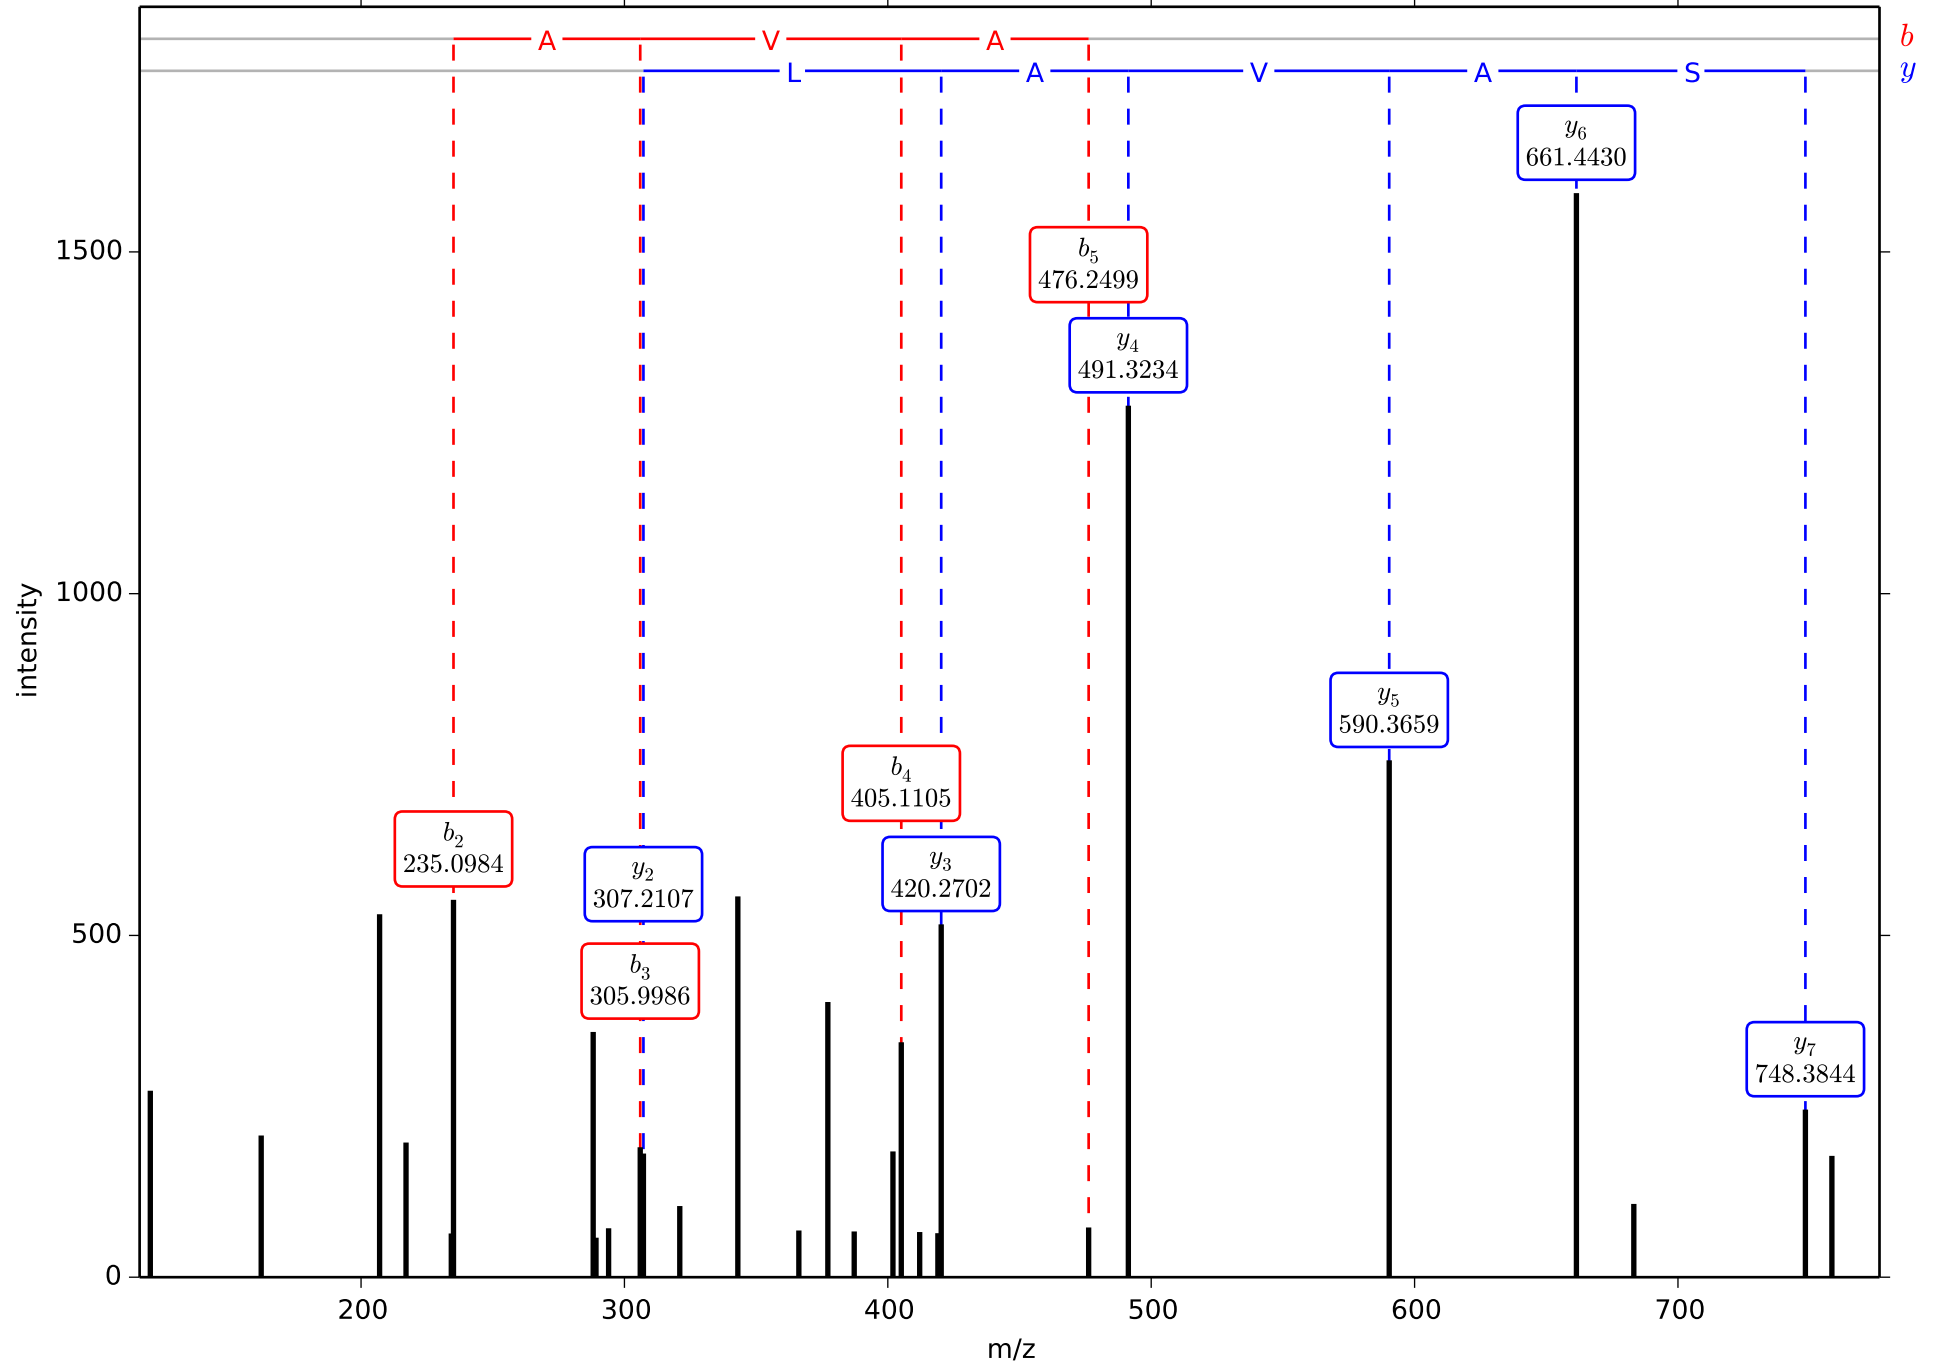

P05202 : VGF<sup>A</sup>TVVCKDAEEAK

parent: 812.411880,2+

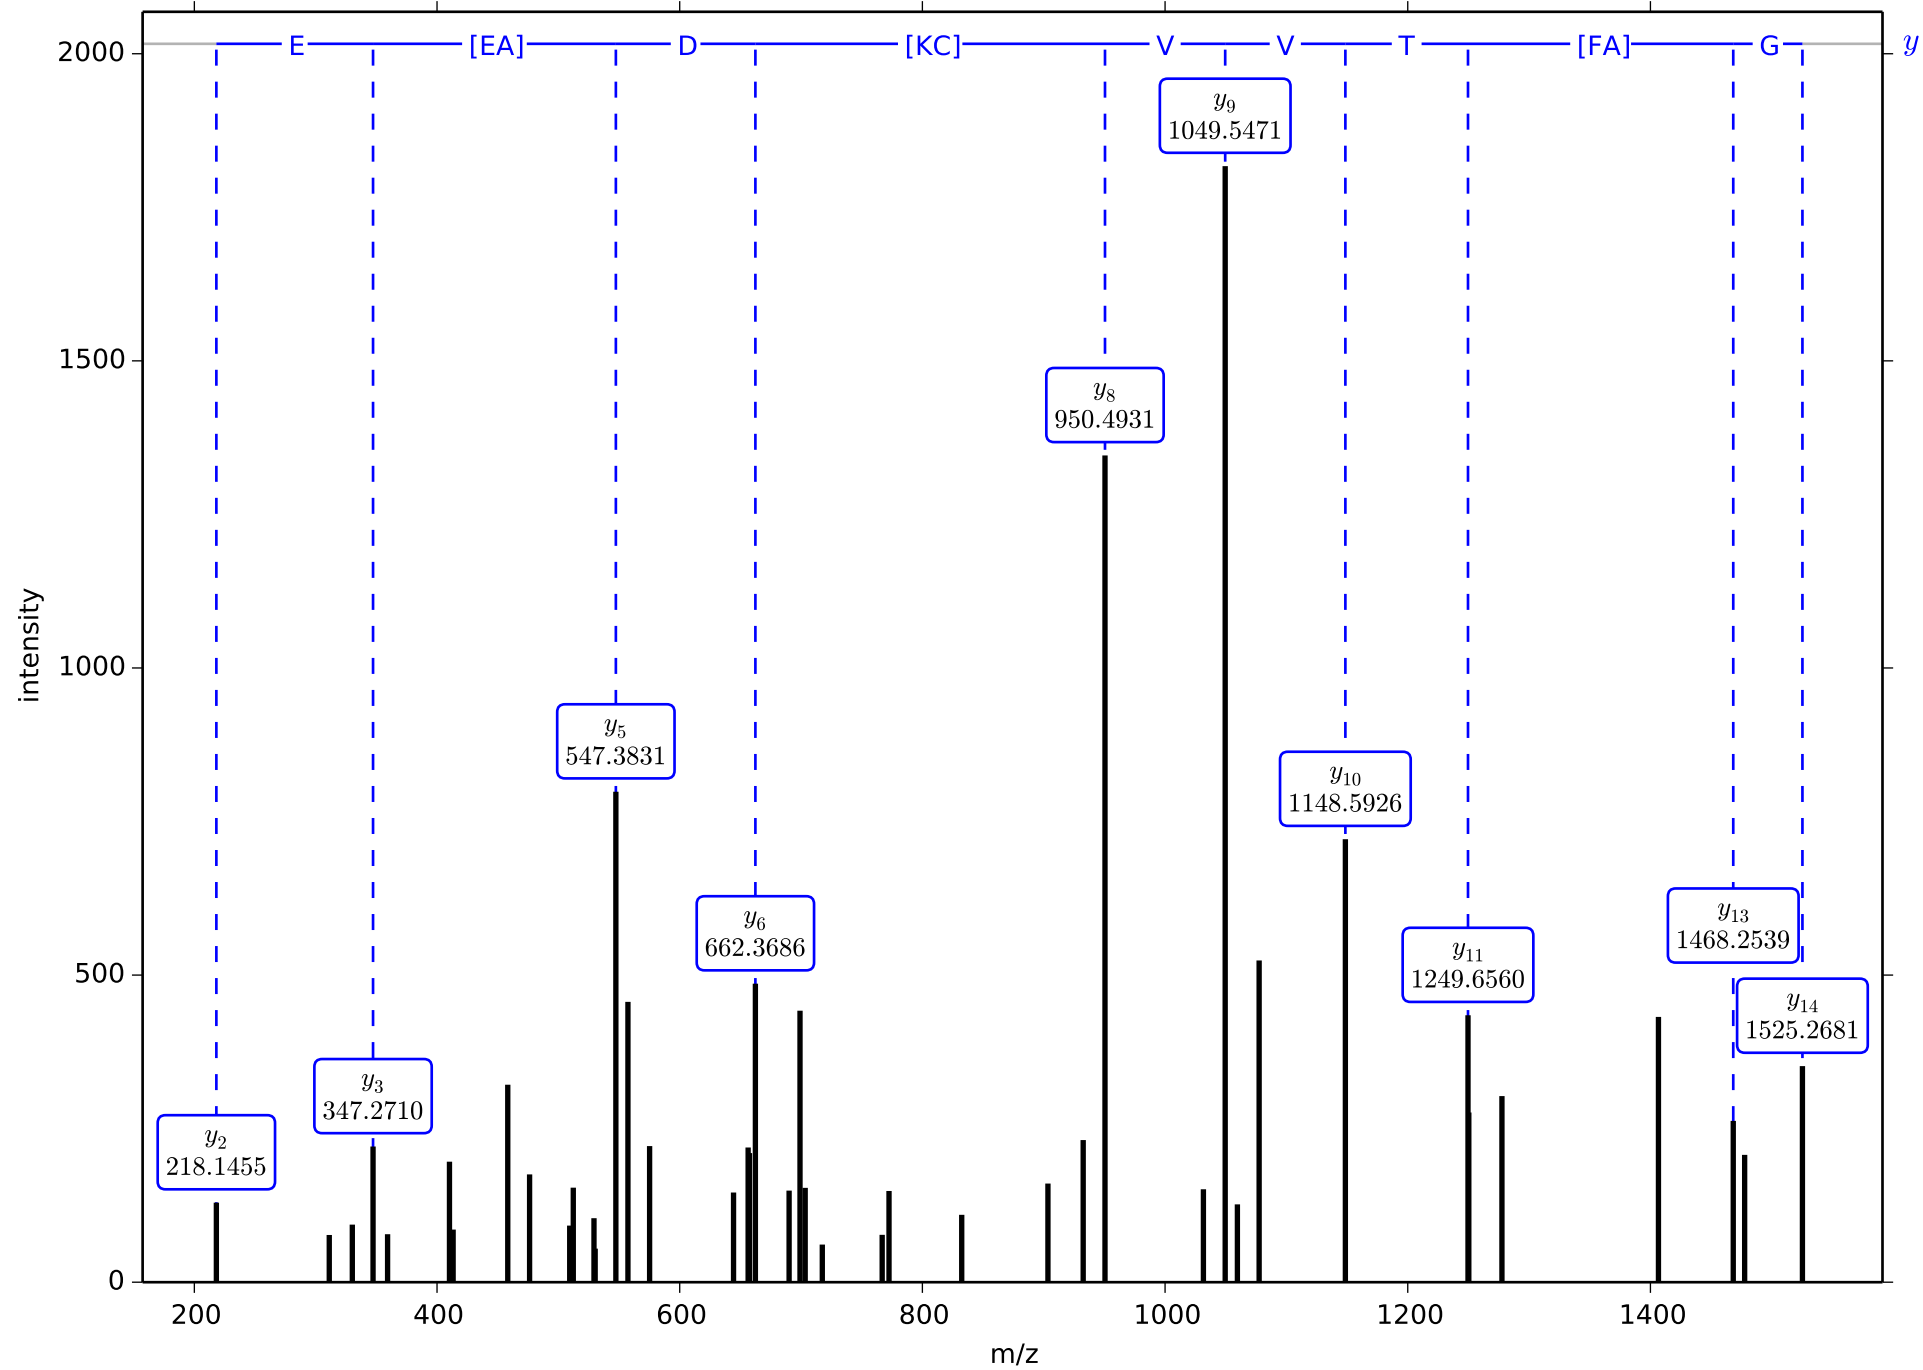

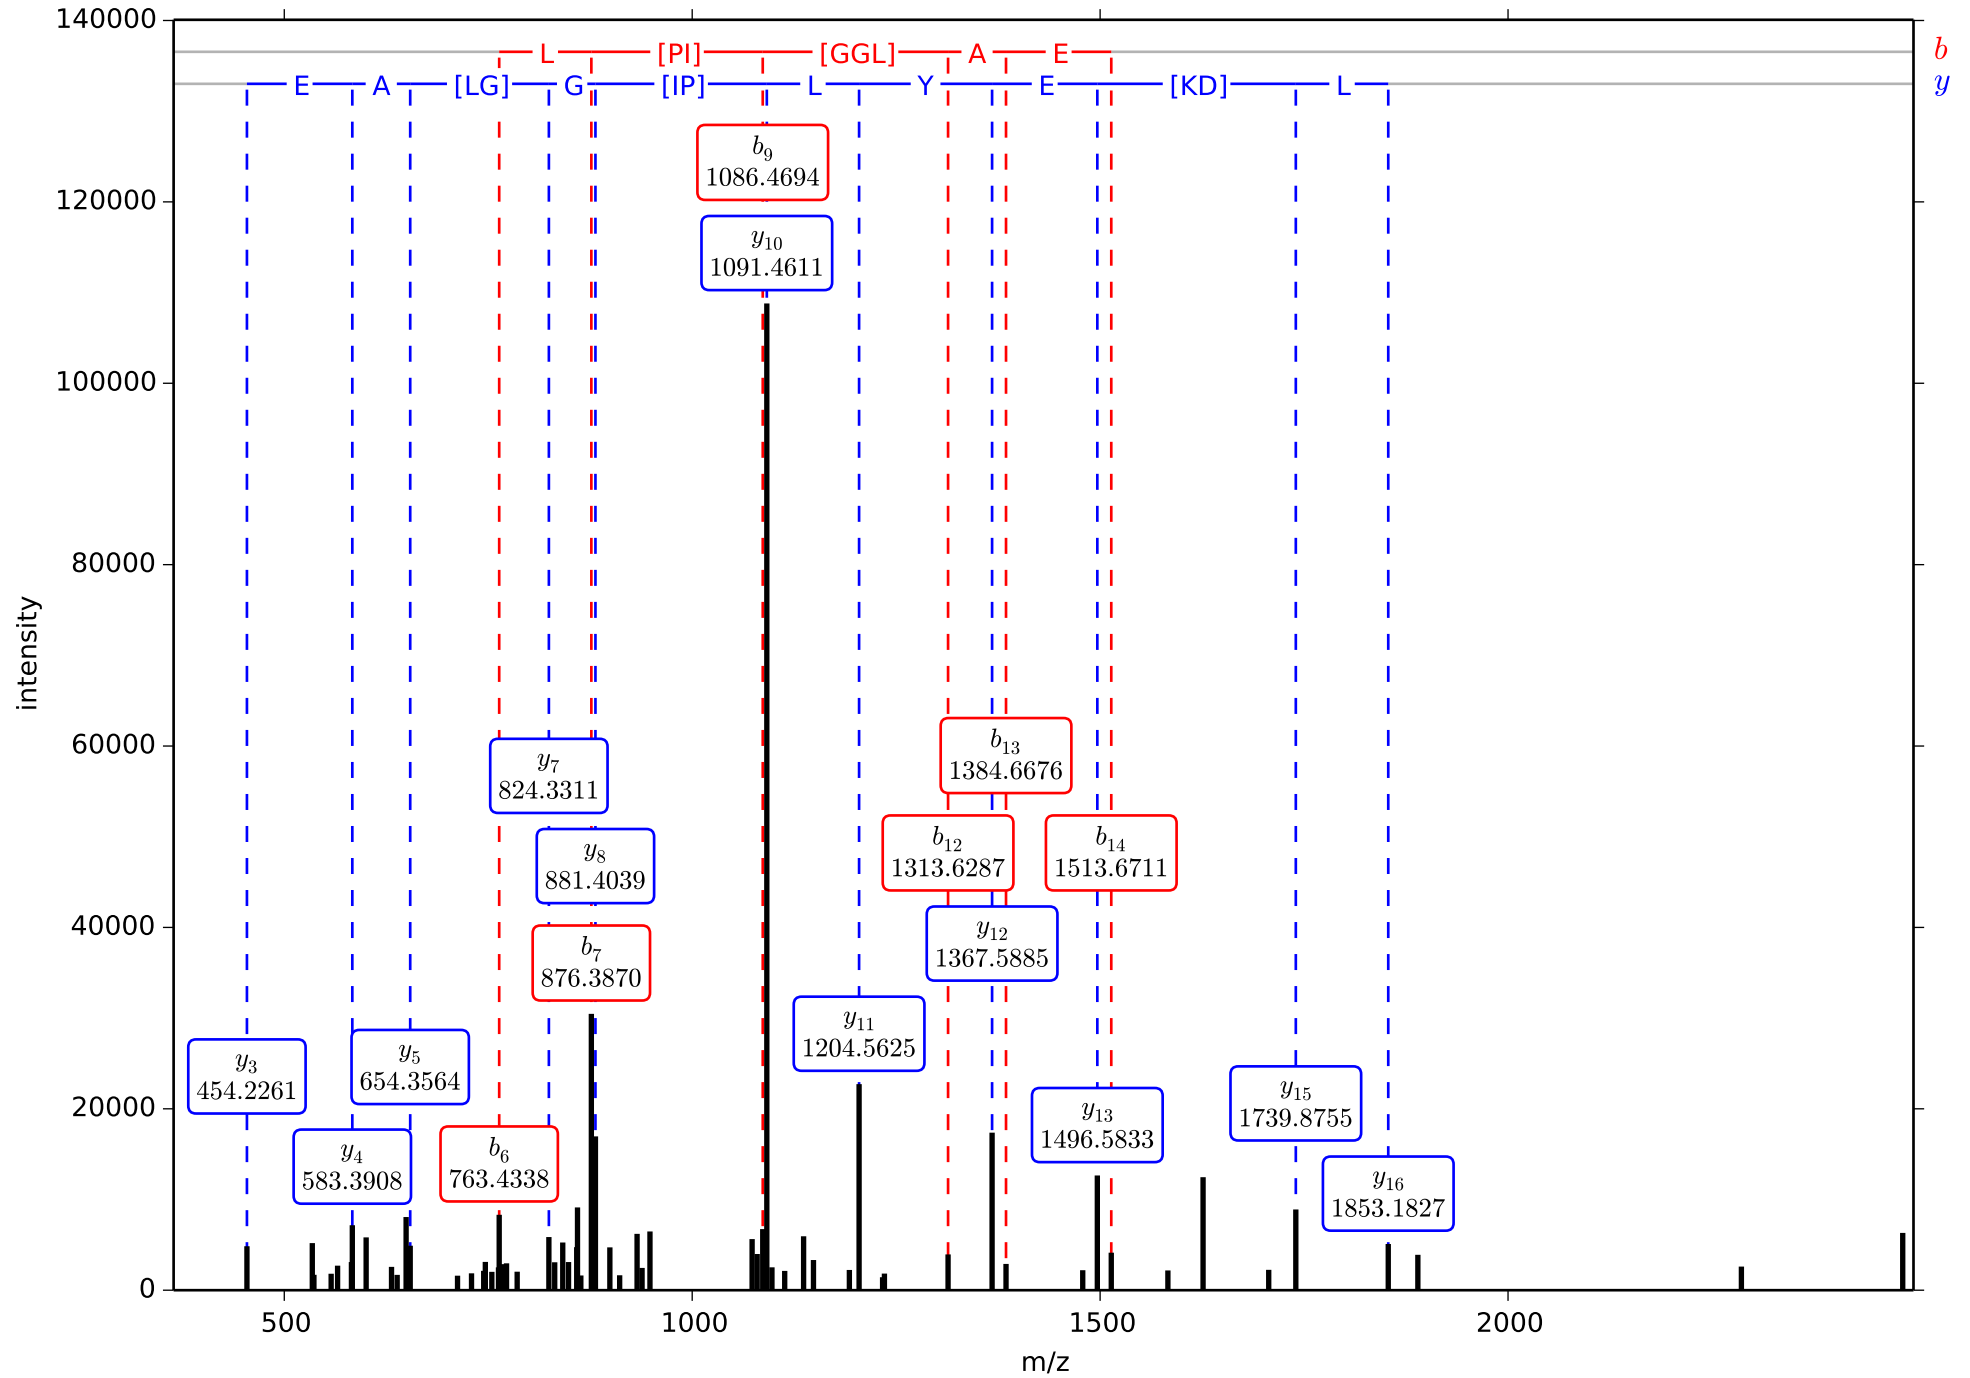

P05202 : VGAFTVVCK

parent: 490.774600,2+

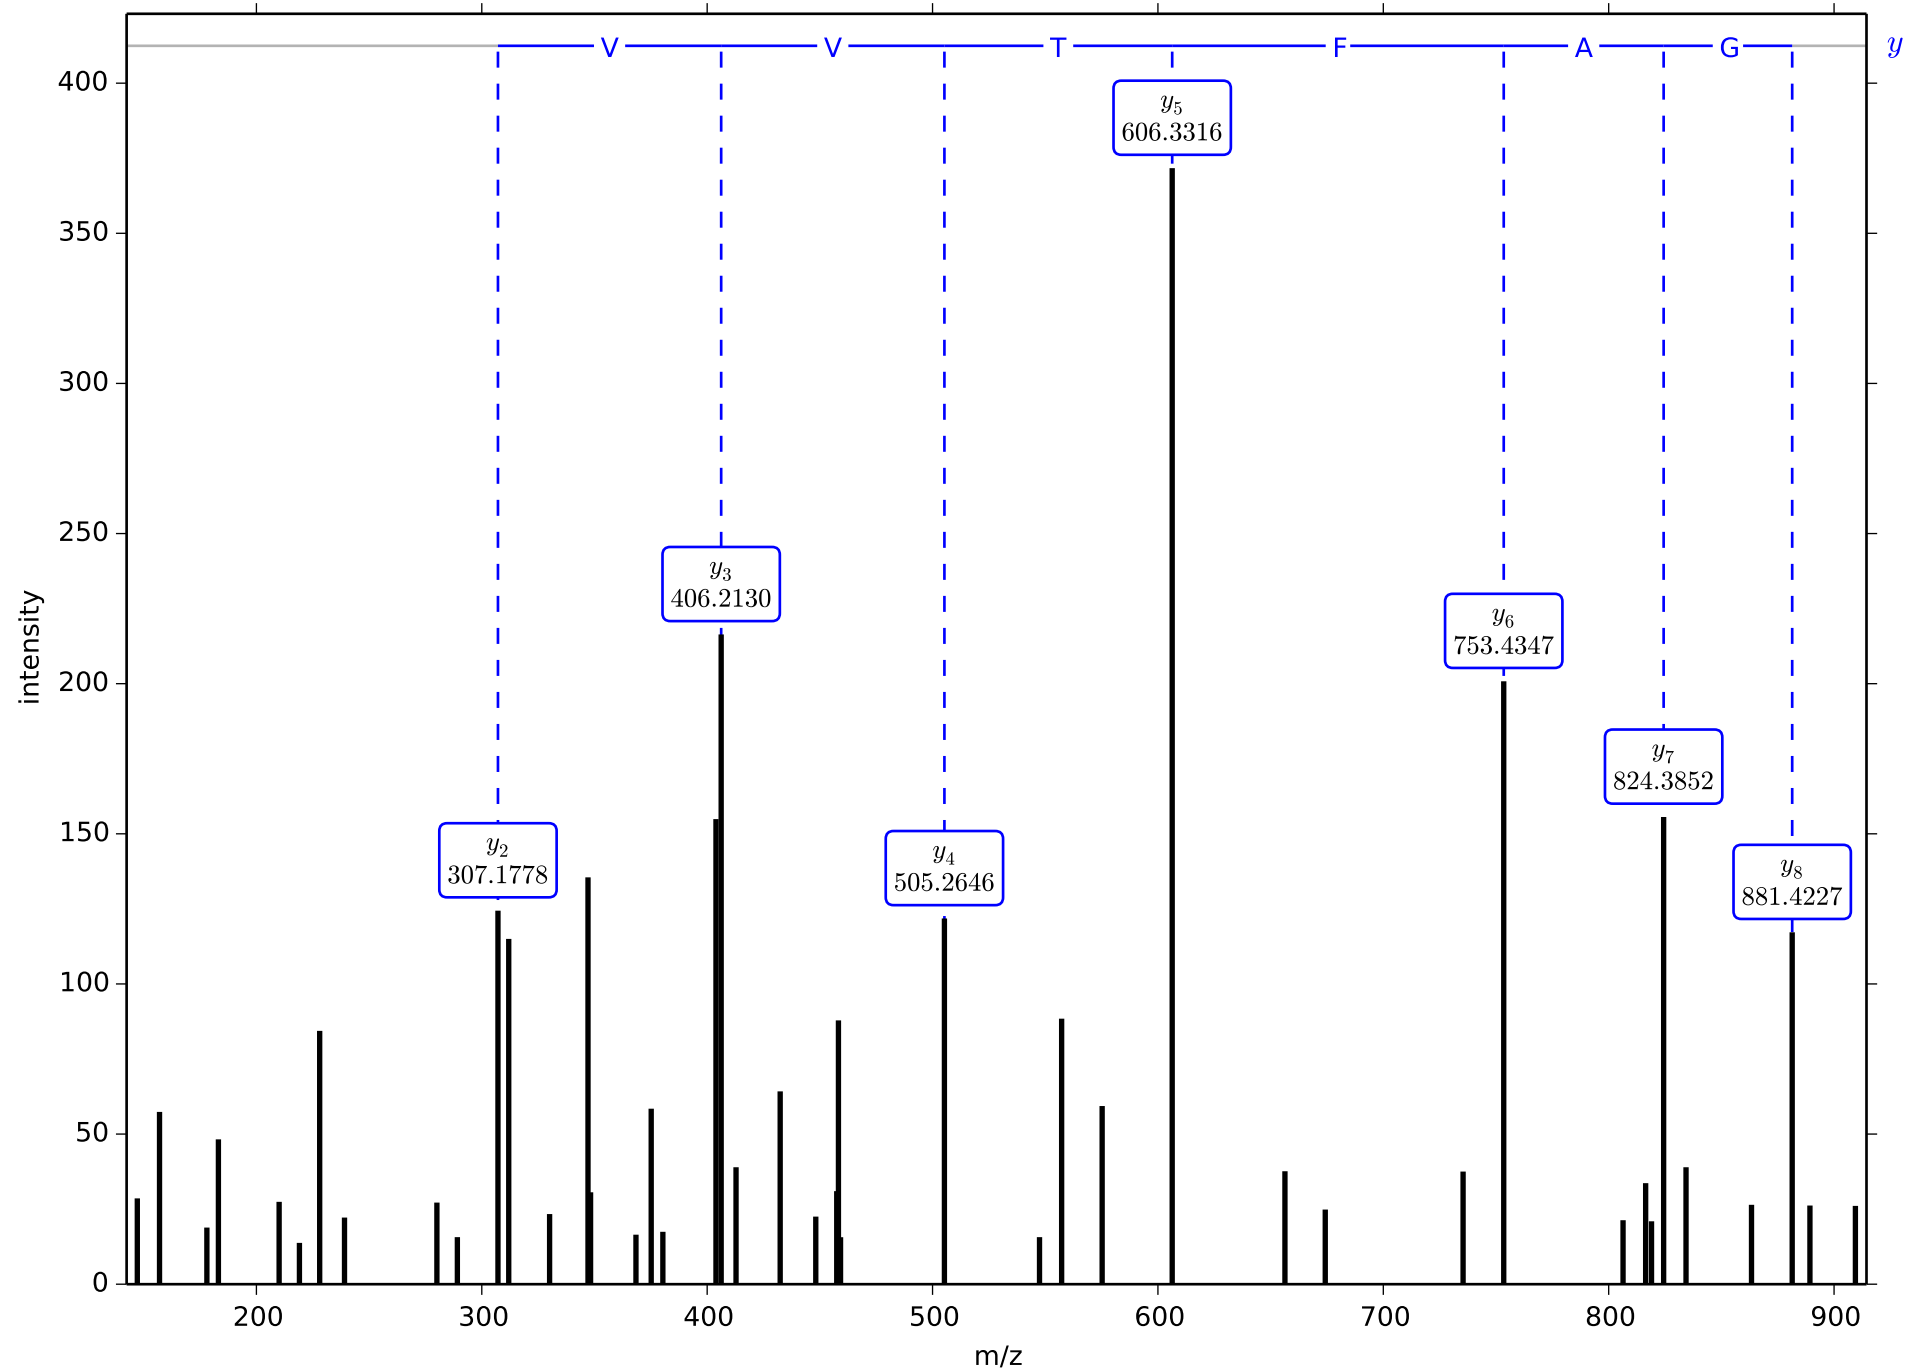

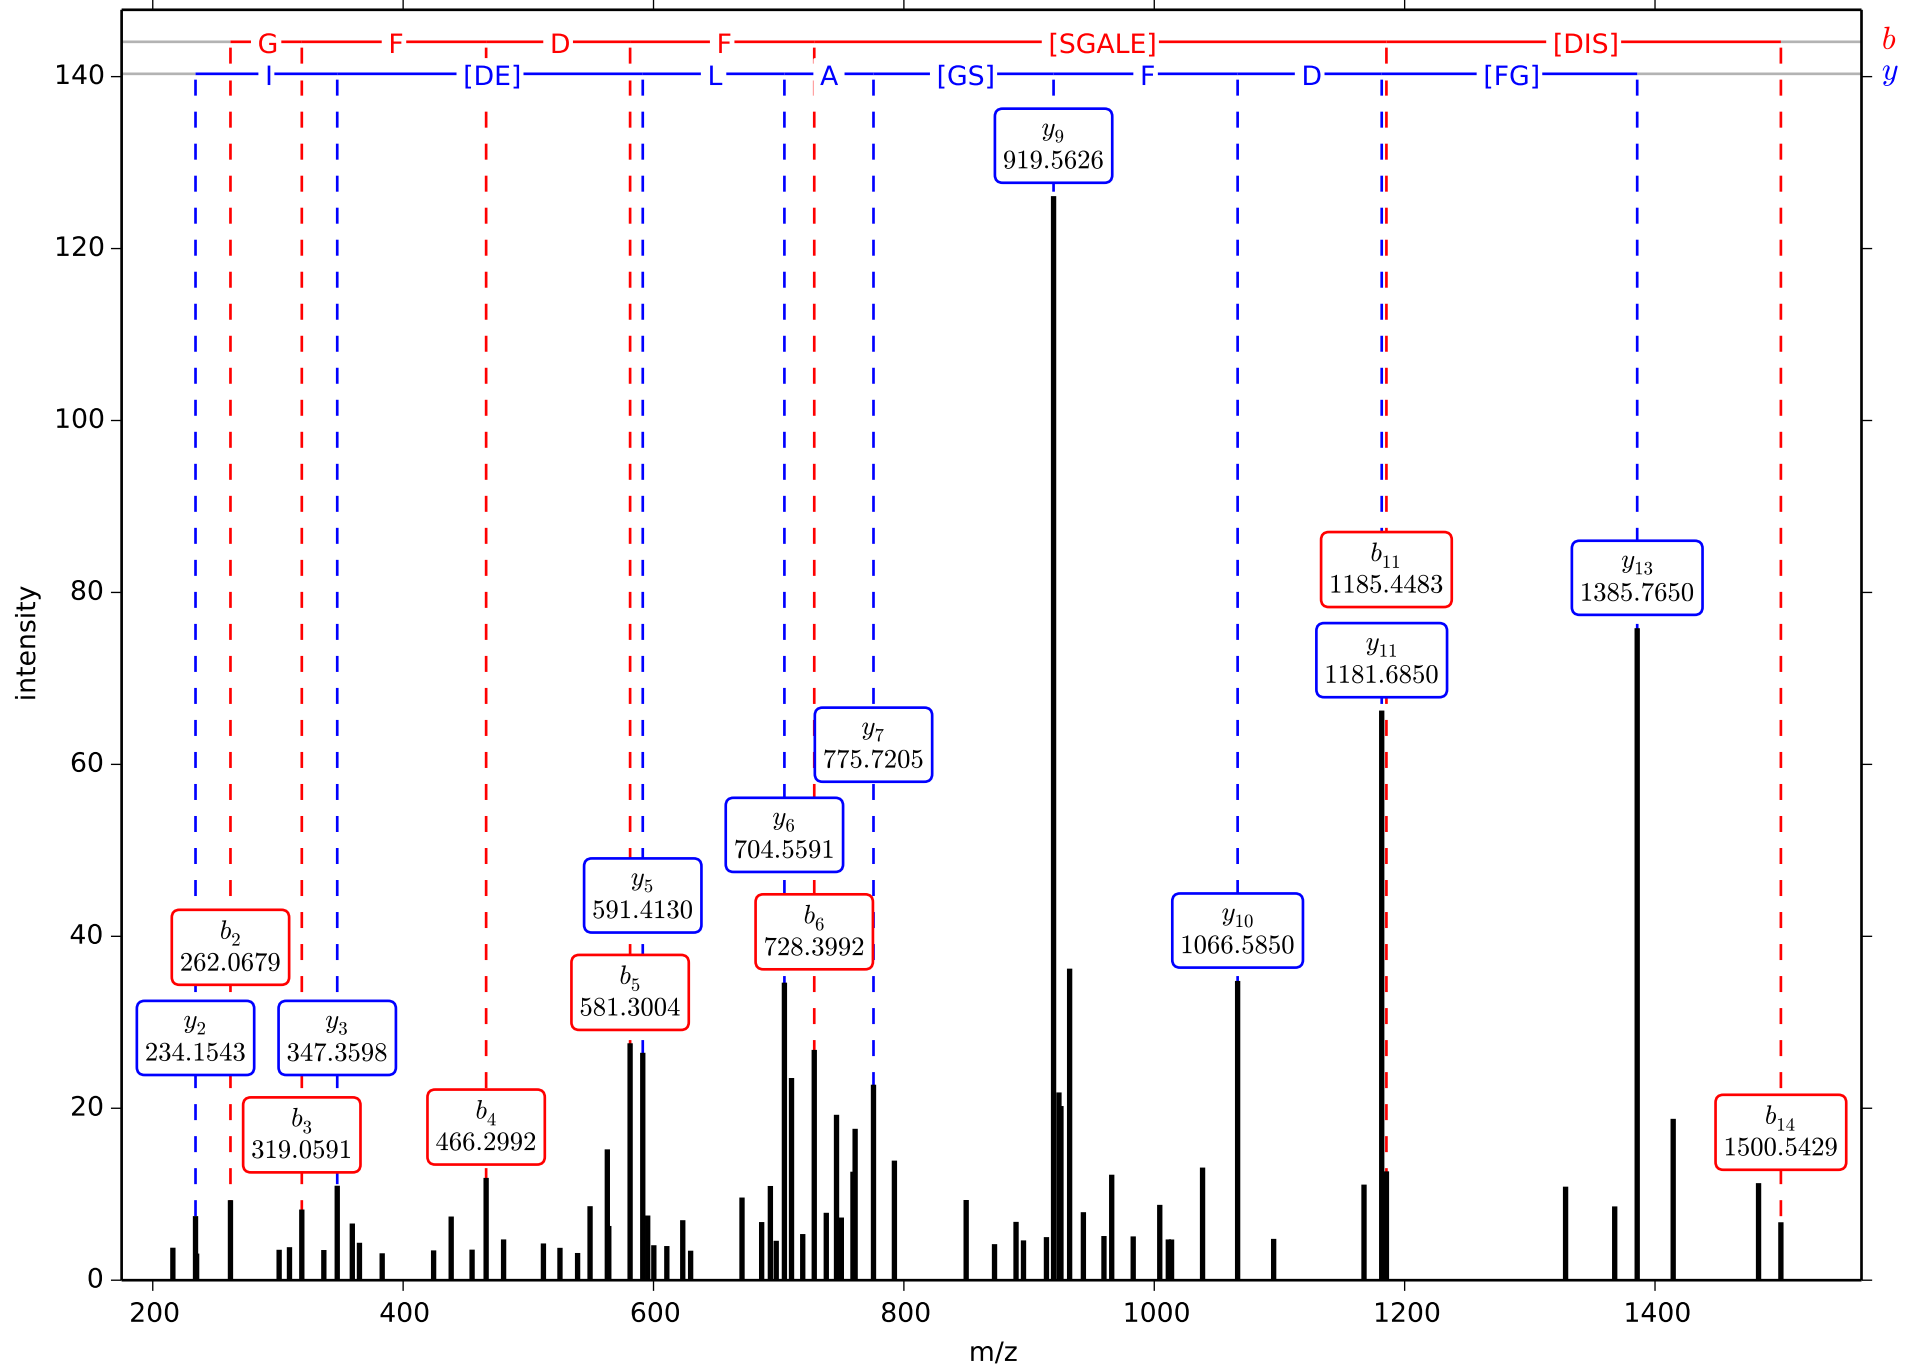



O08553 : SITIANQTNCPPLYVTK

parent: 911.974370,2+

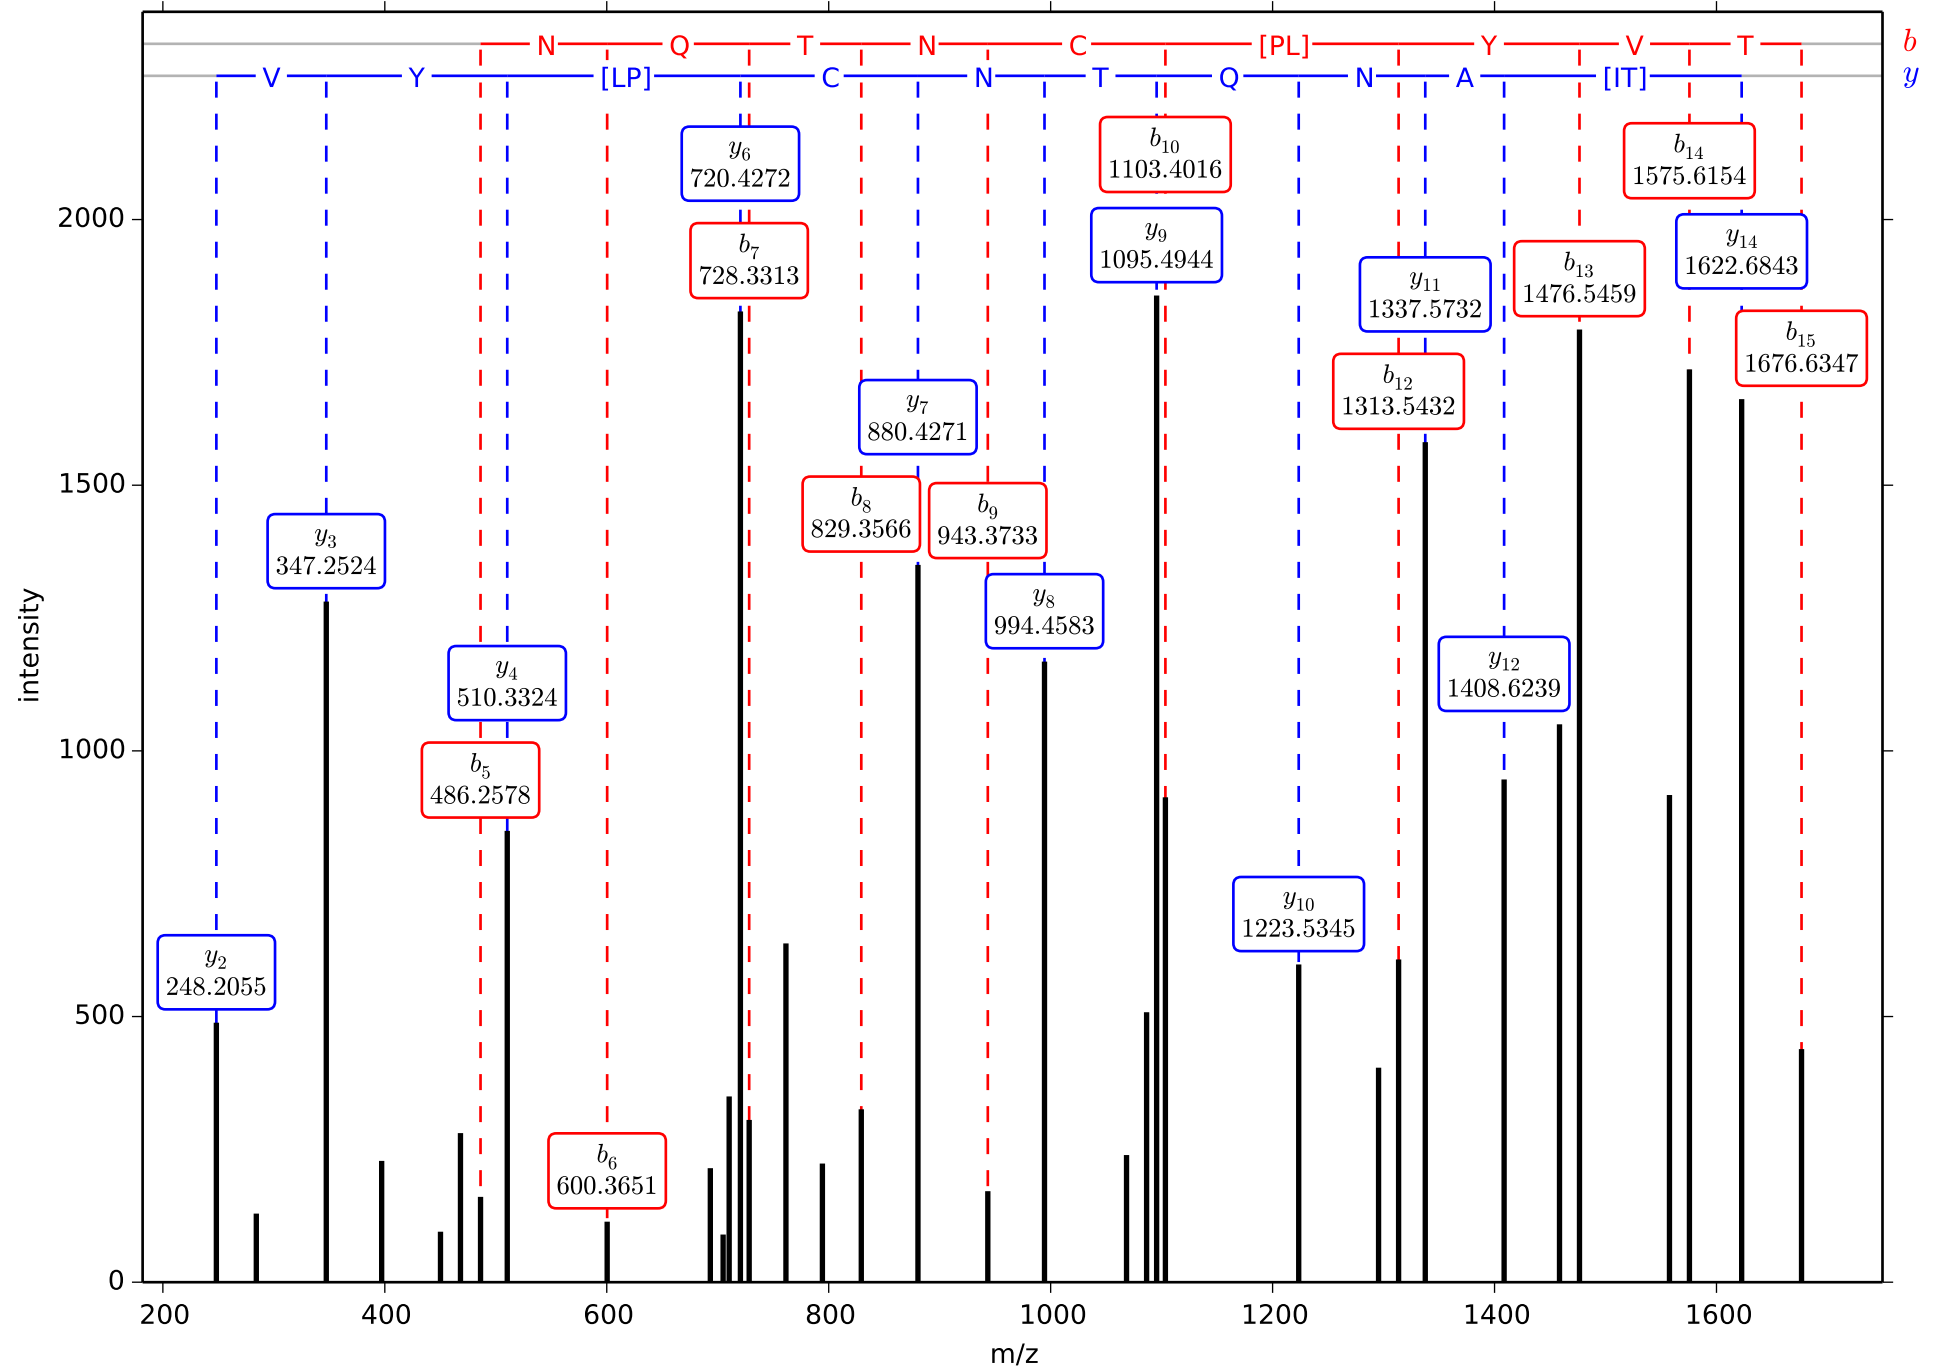

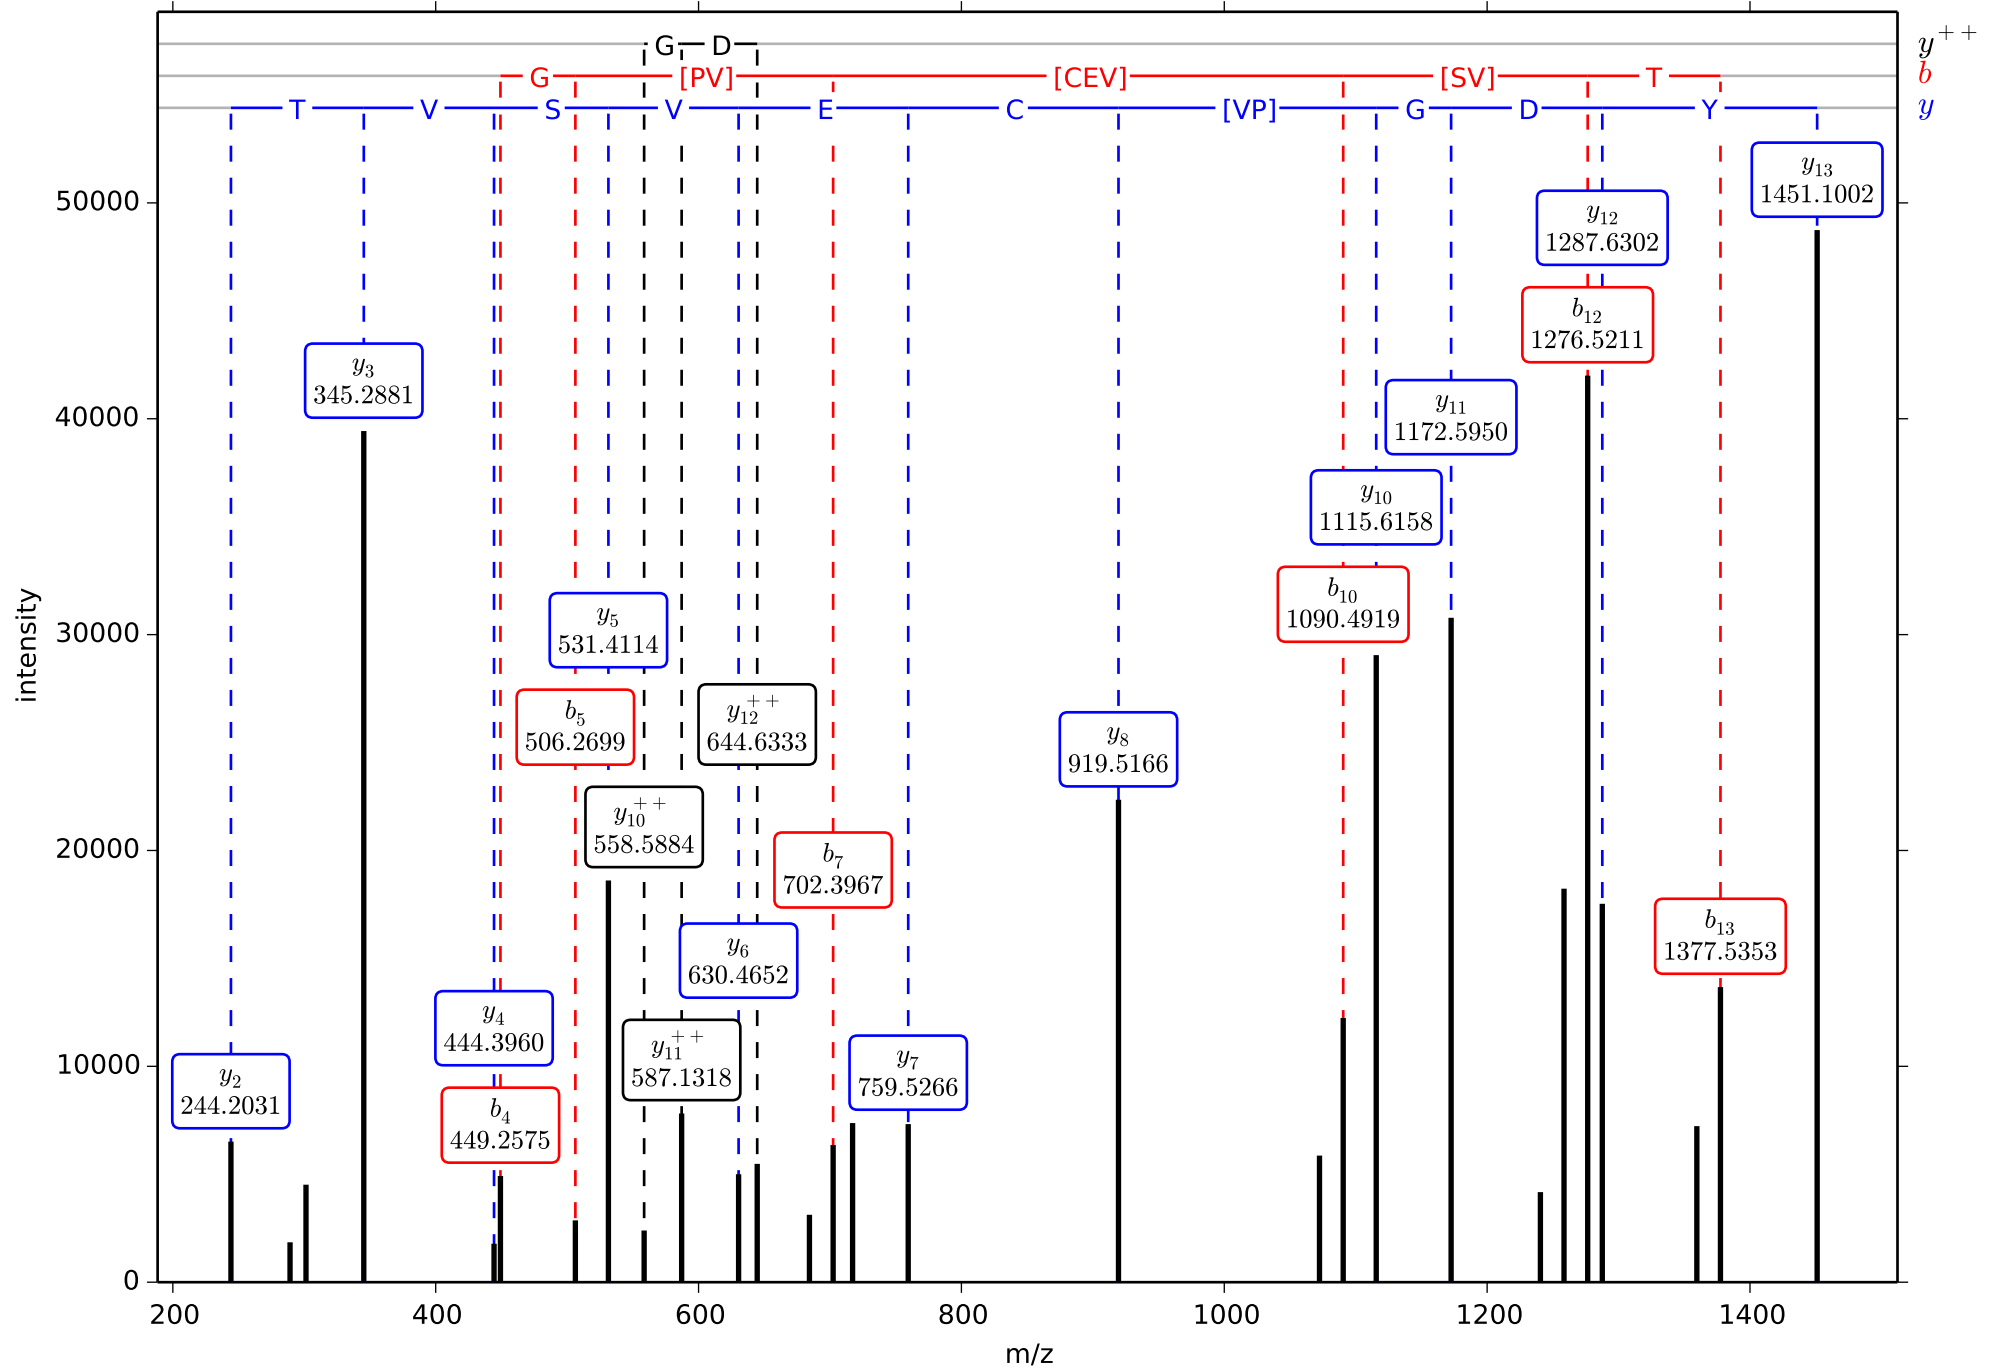

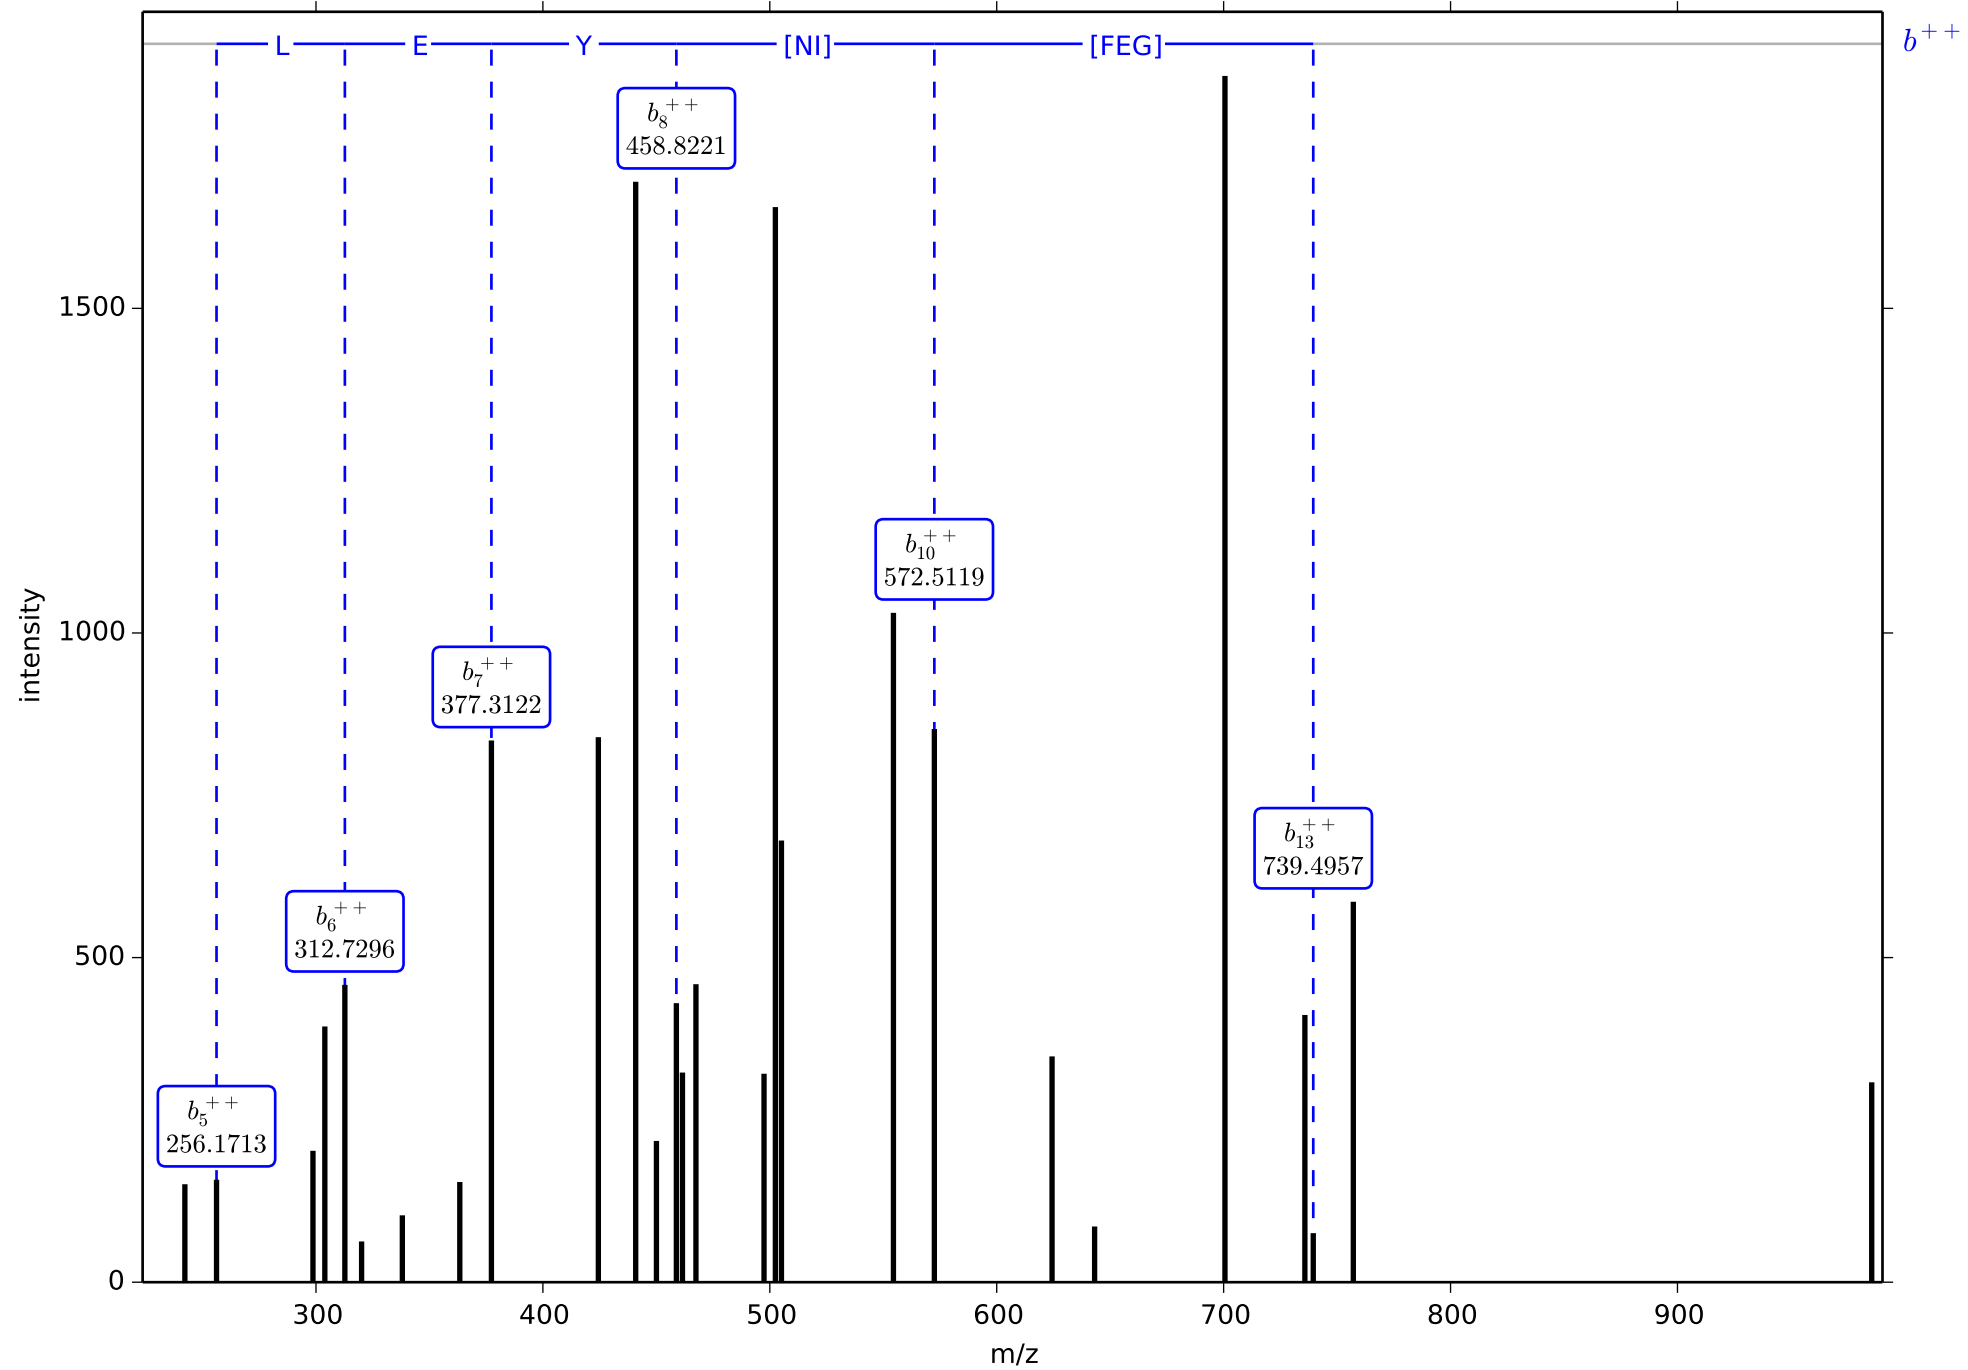

P63001 : YLECSALTQR

parent: 620.801310,2+

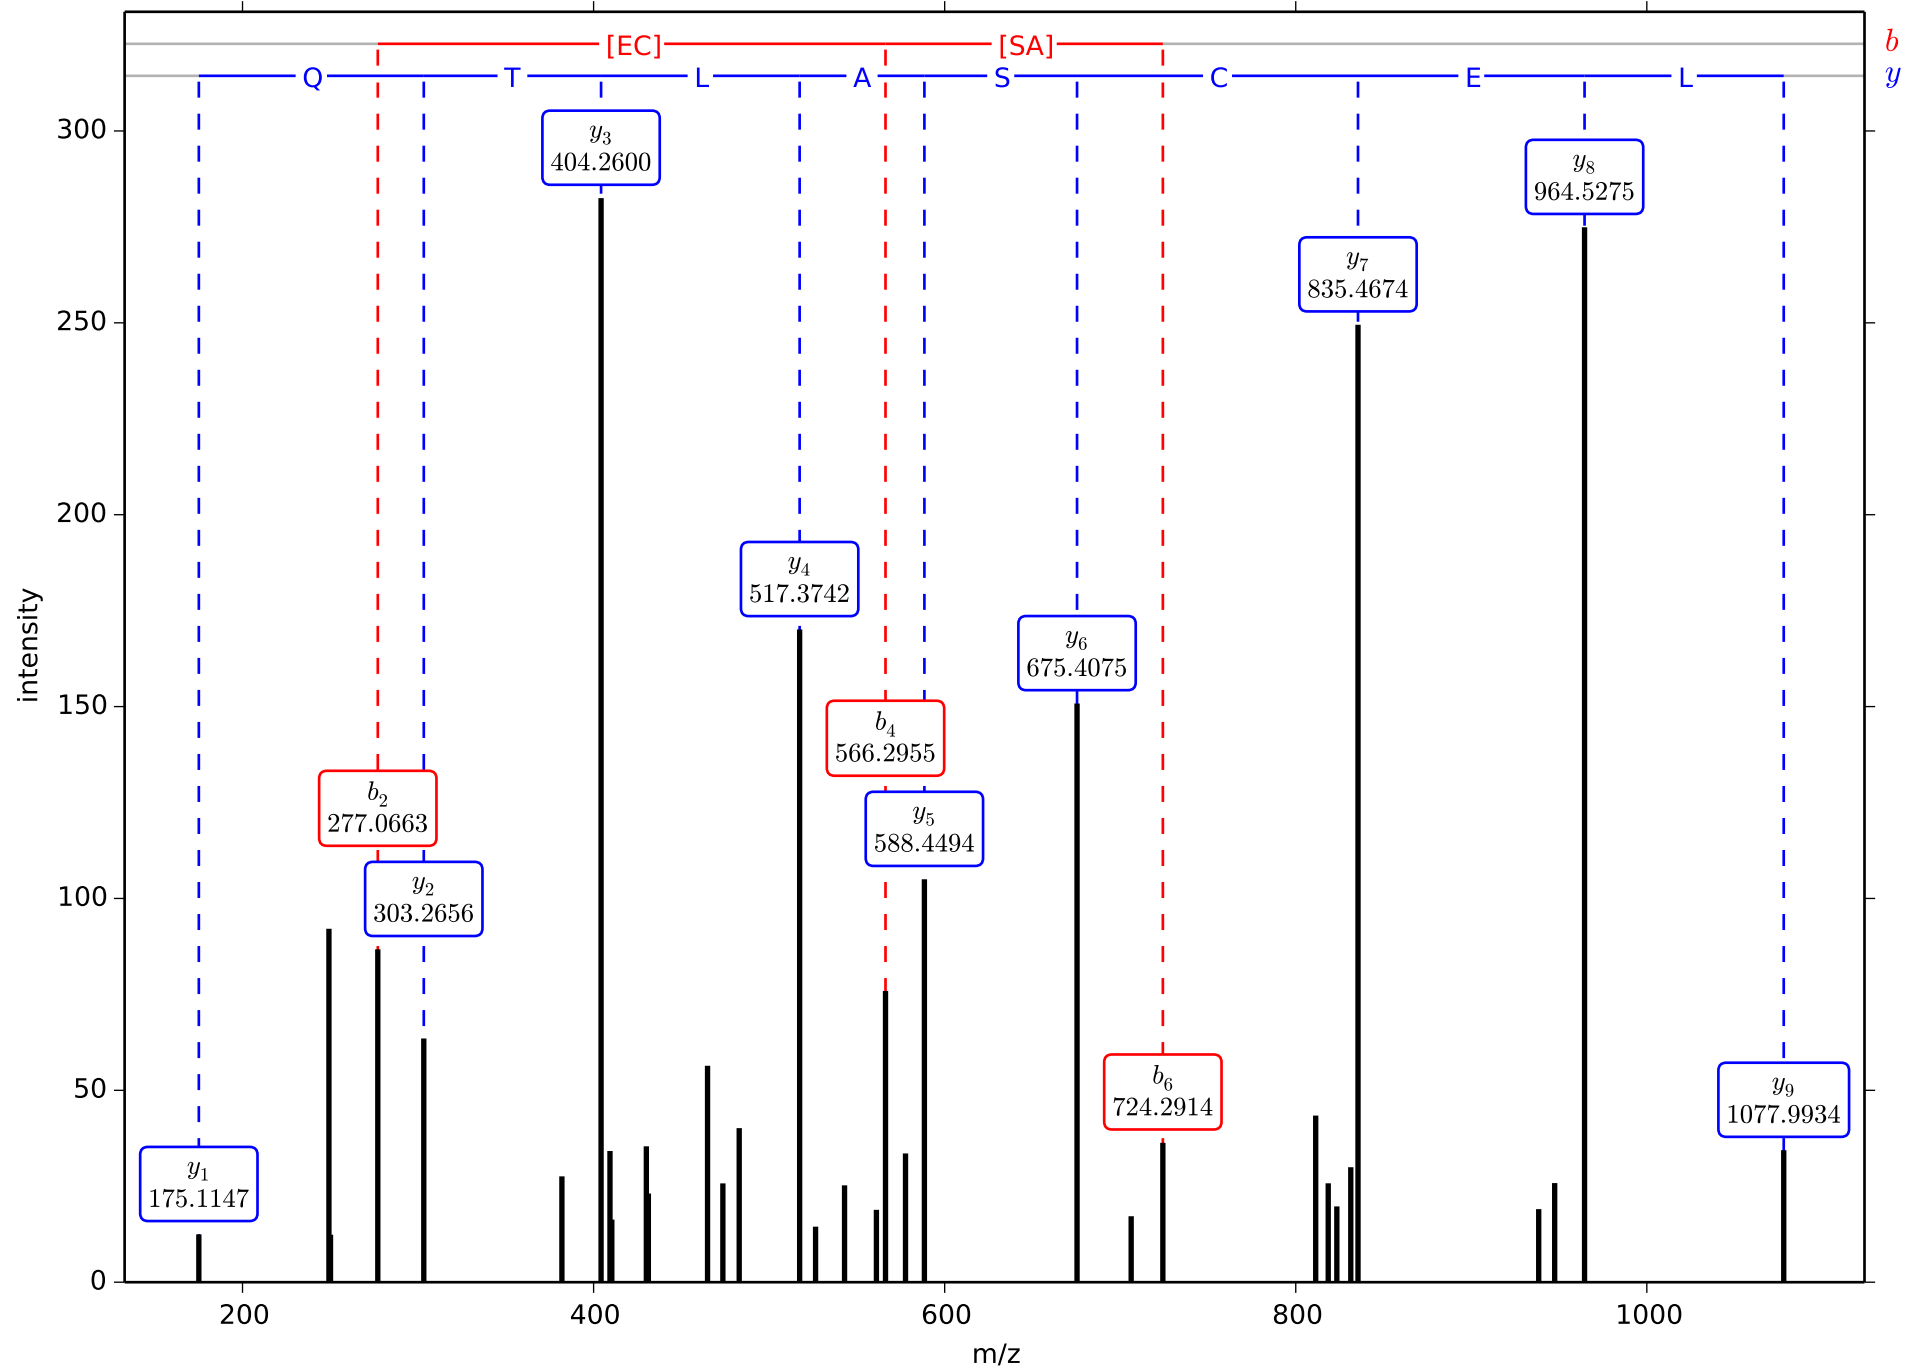

P63001 : HHCPNTPIILVGTK

parent: 793.907260,2+

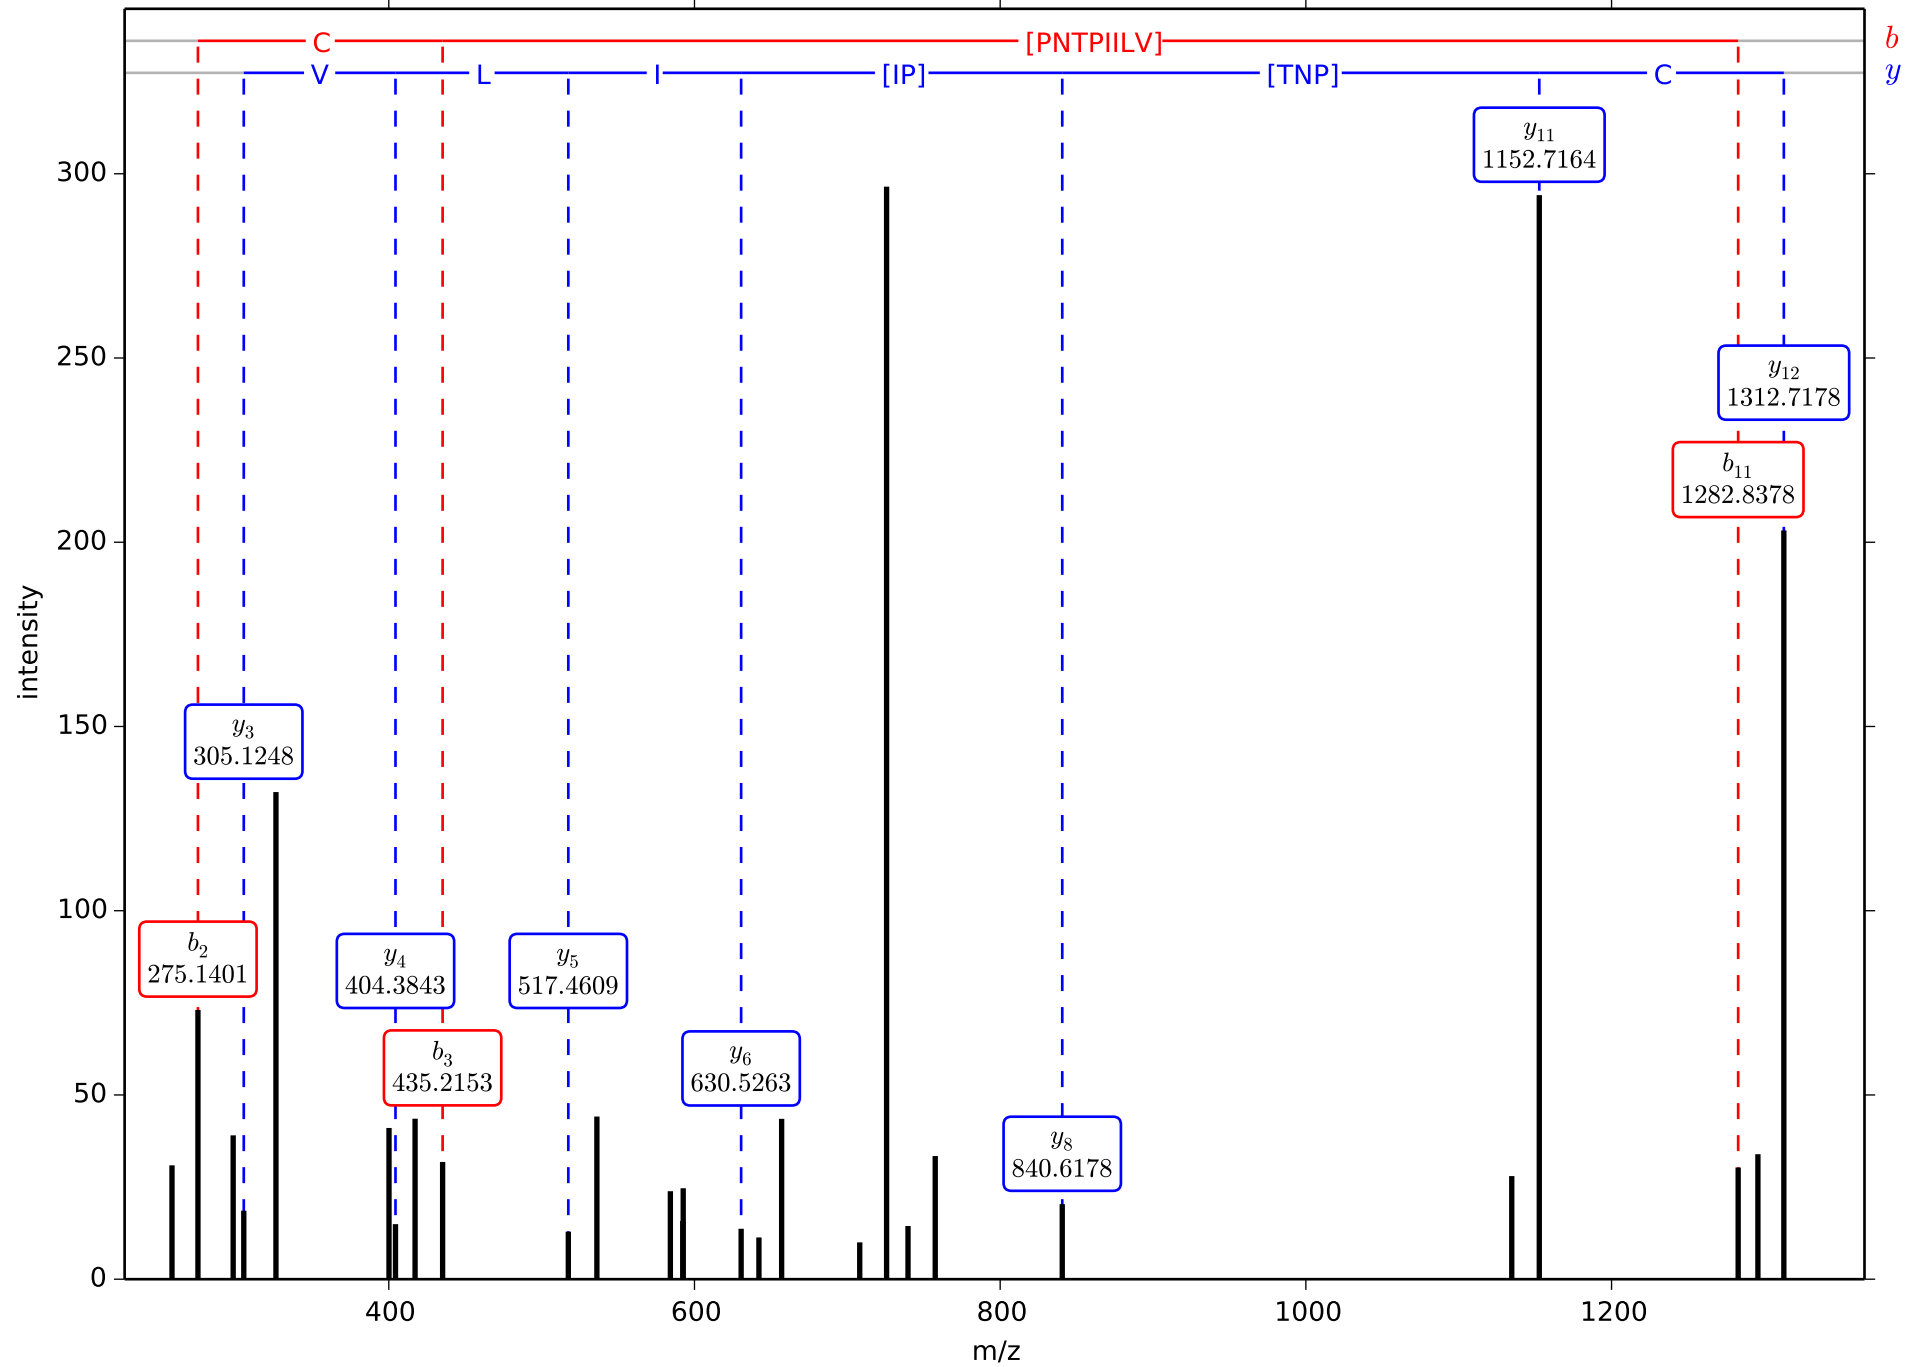

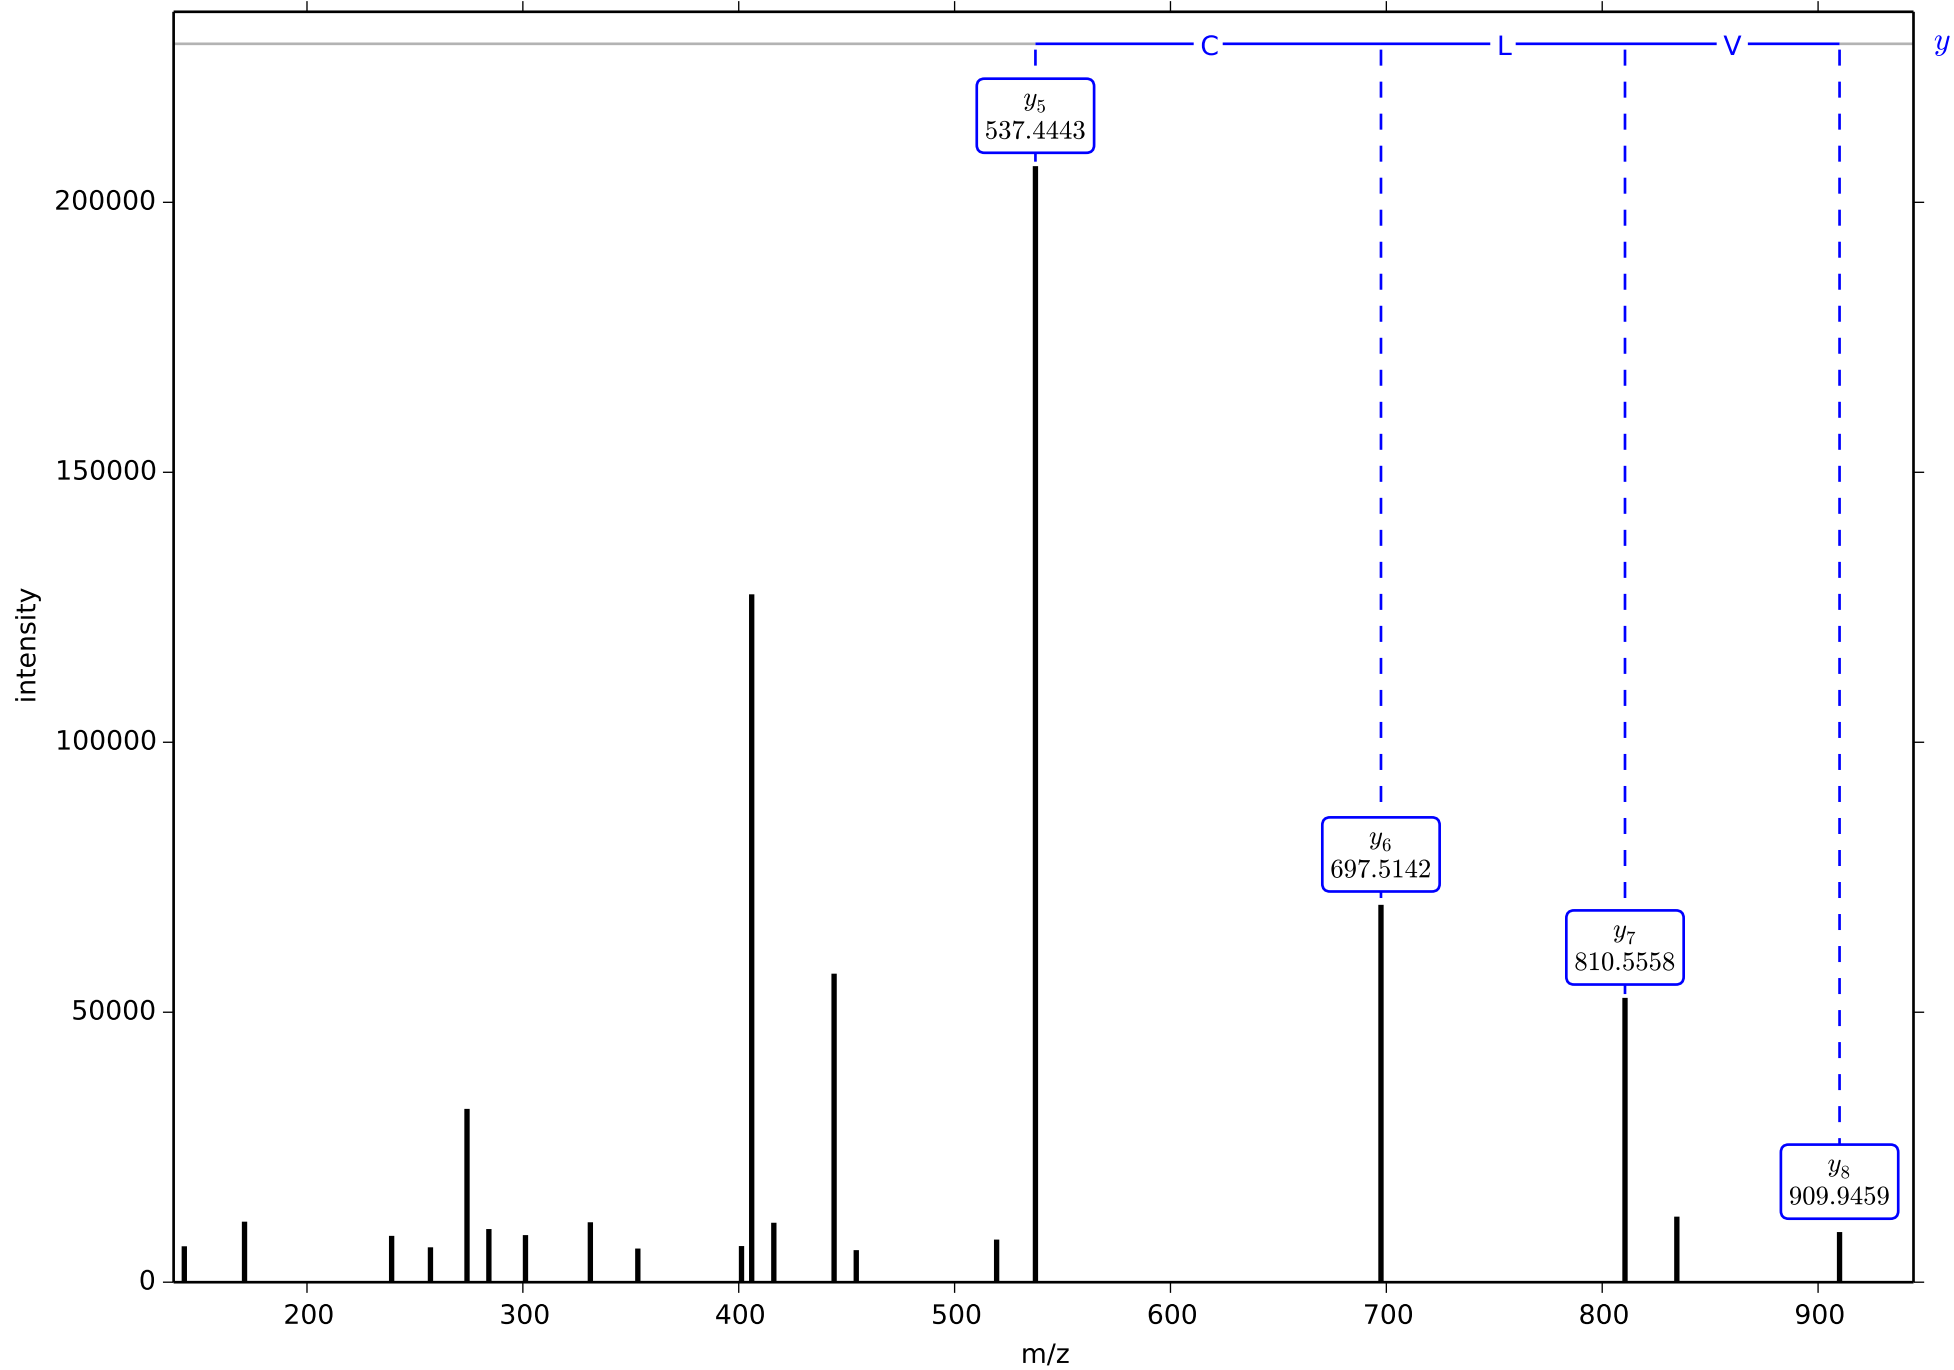

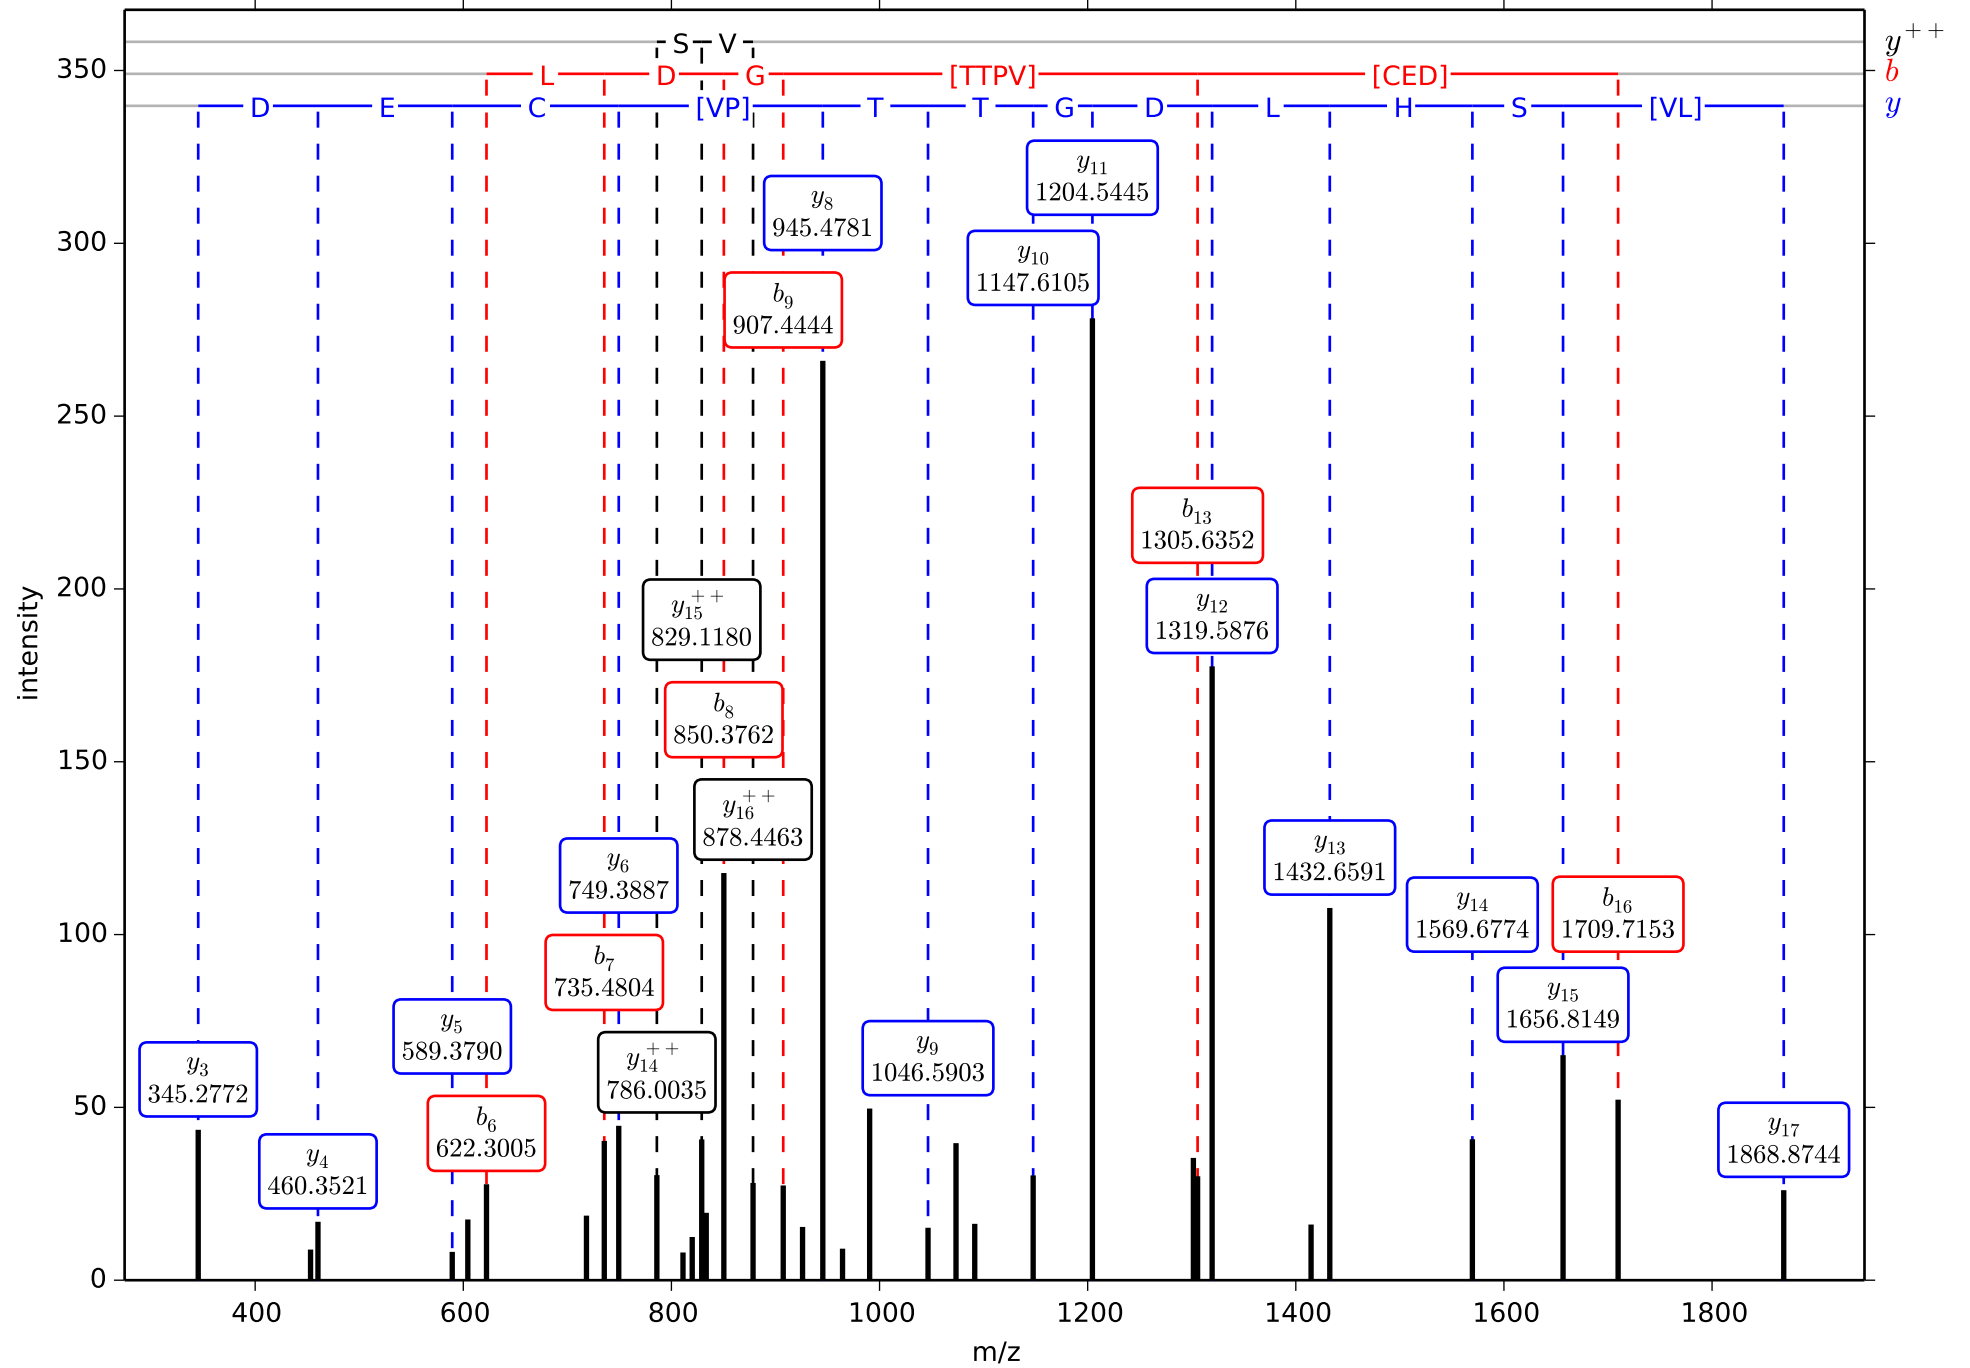

Q9CZ13 : LCTSATESEVTR

parent: 677.312180,2+

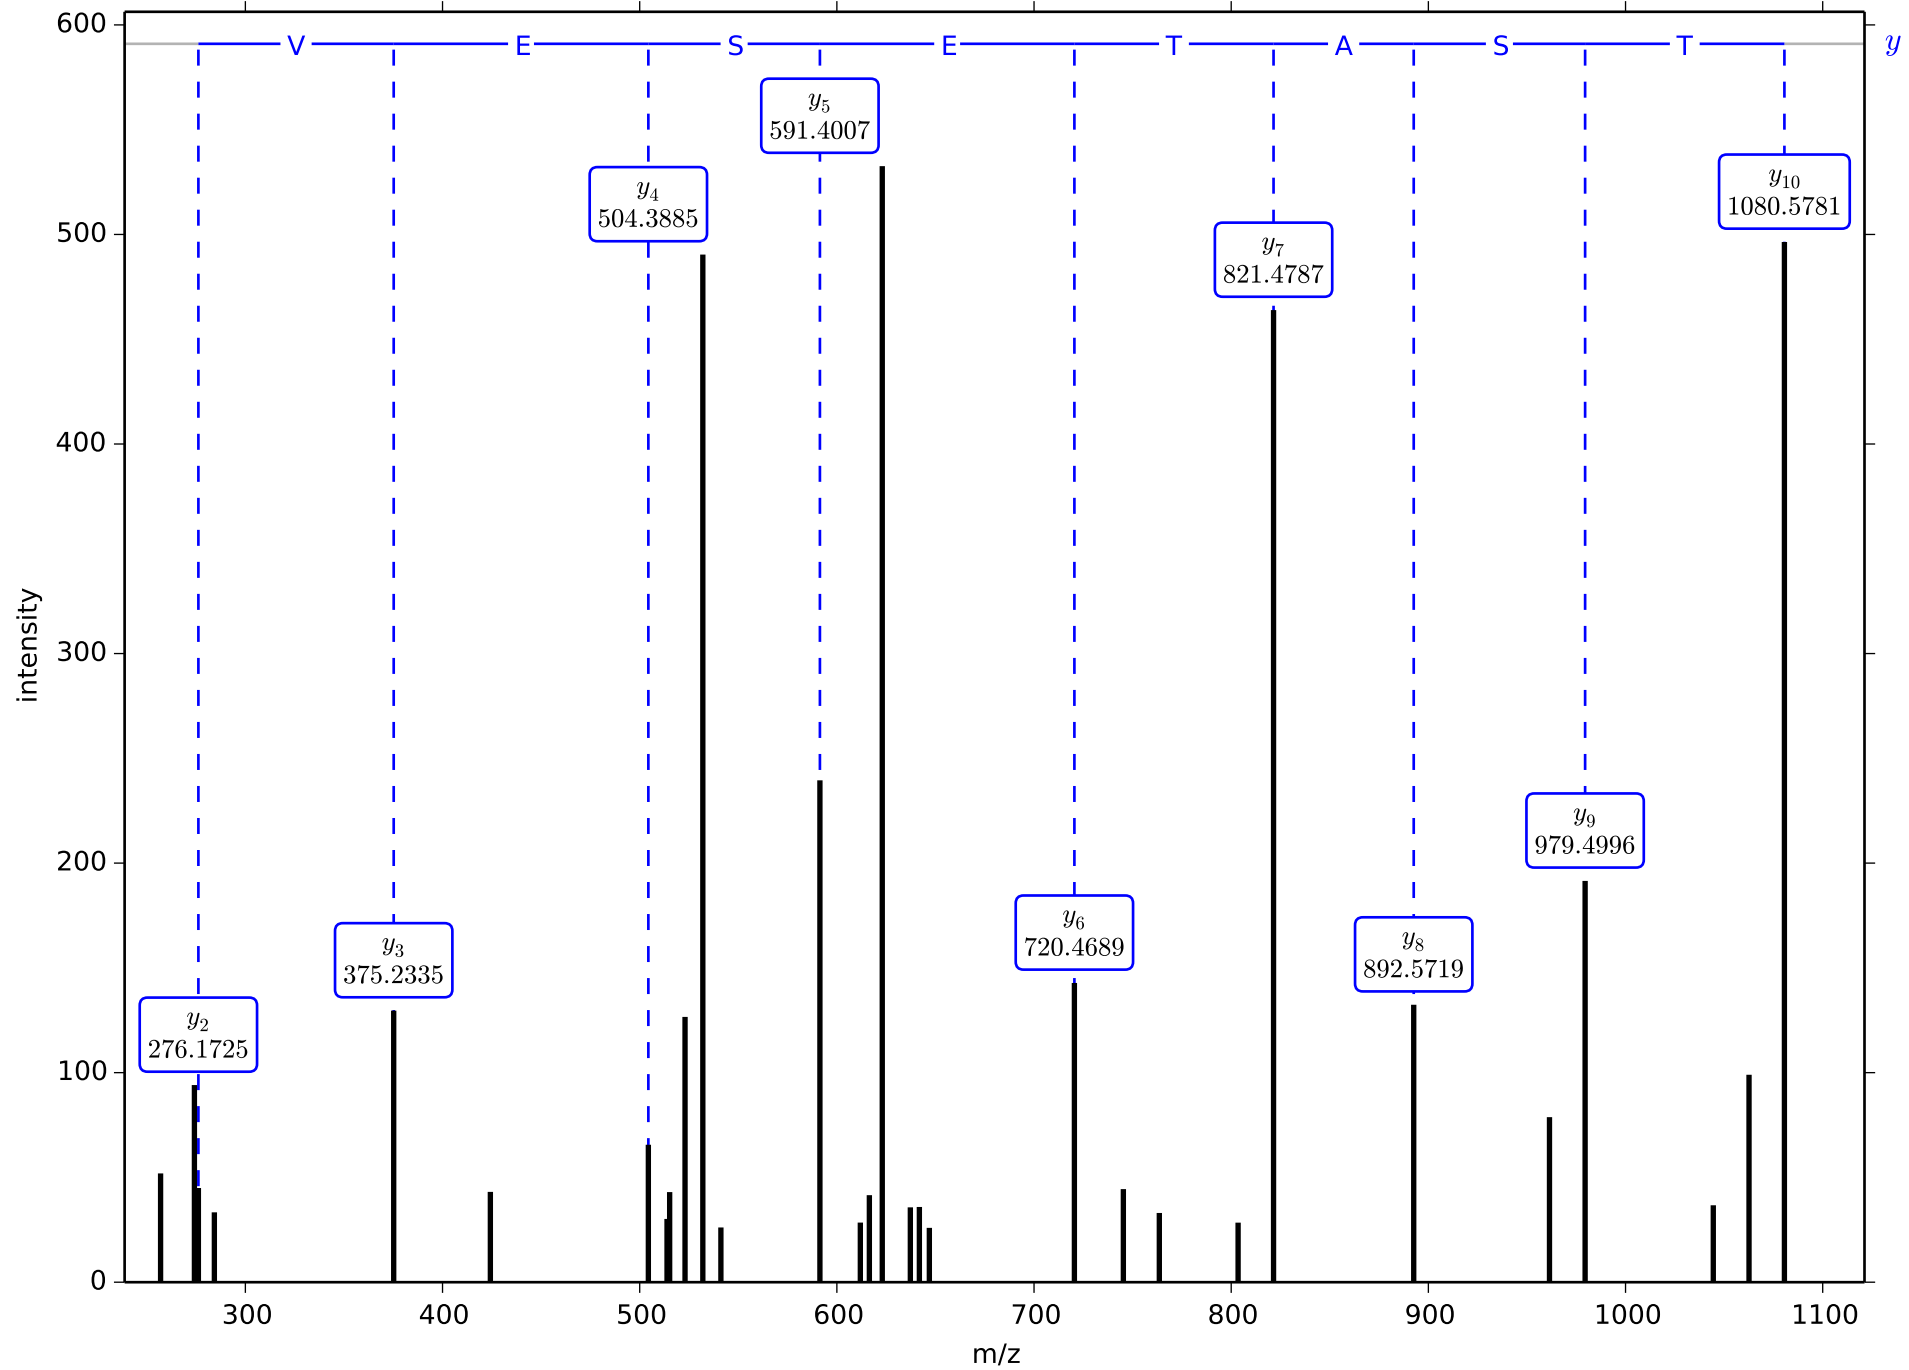



Q9CZ13 : VYEDAVPGLTPCR

parent: 803.381130,2+

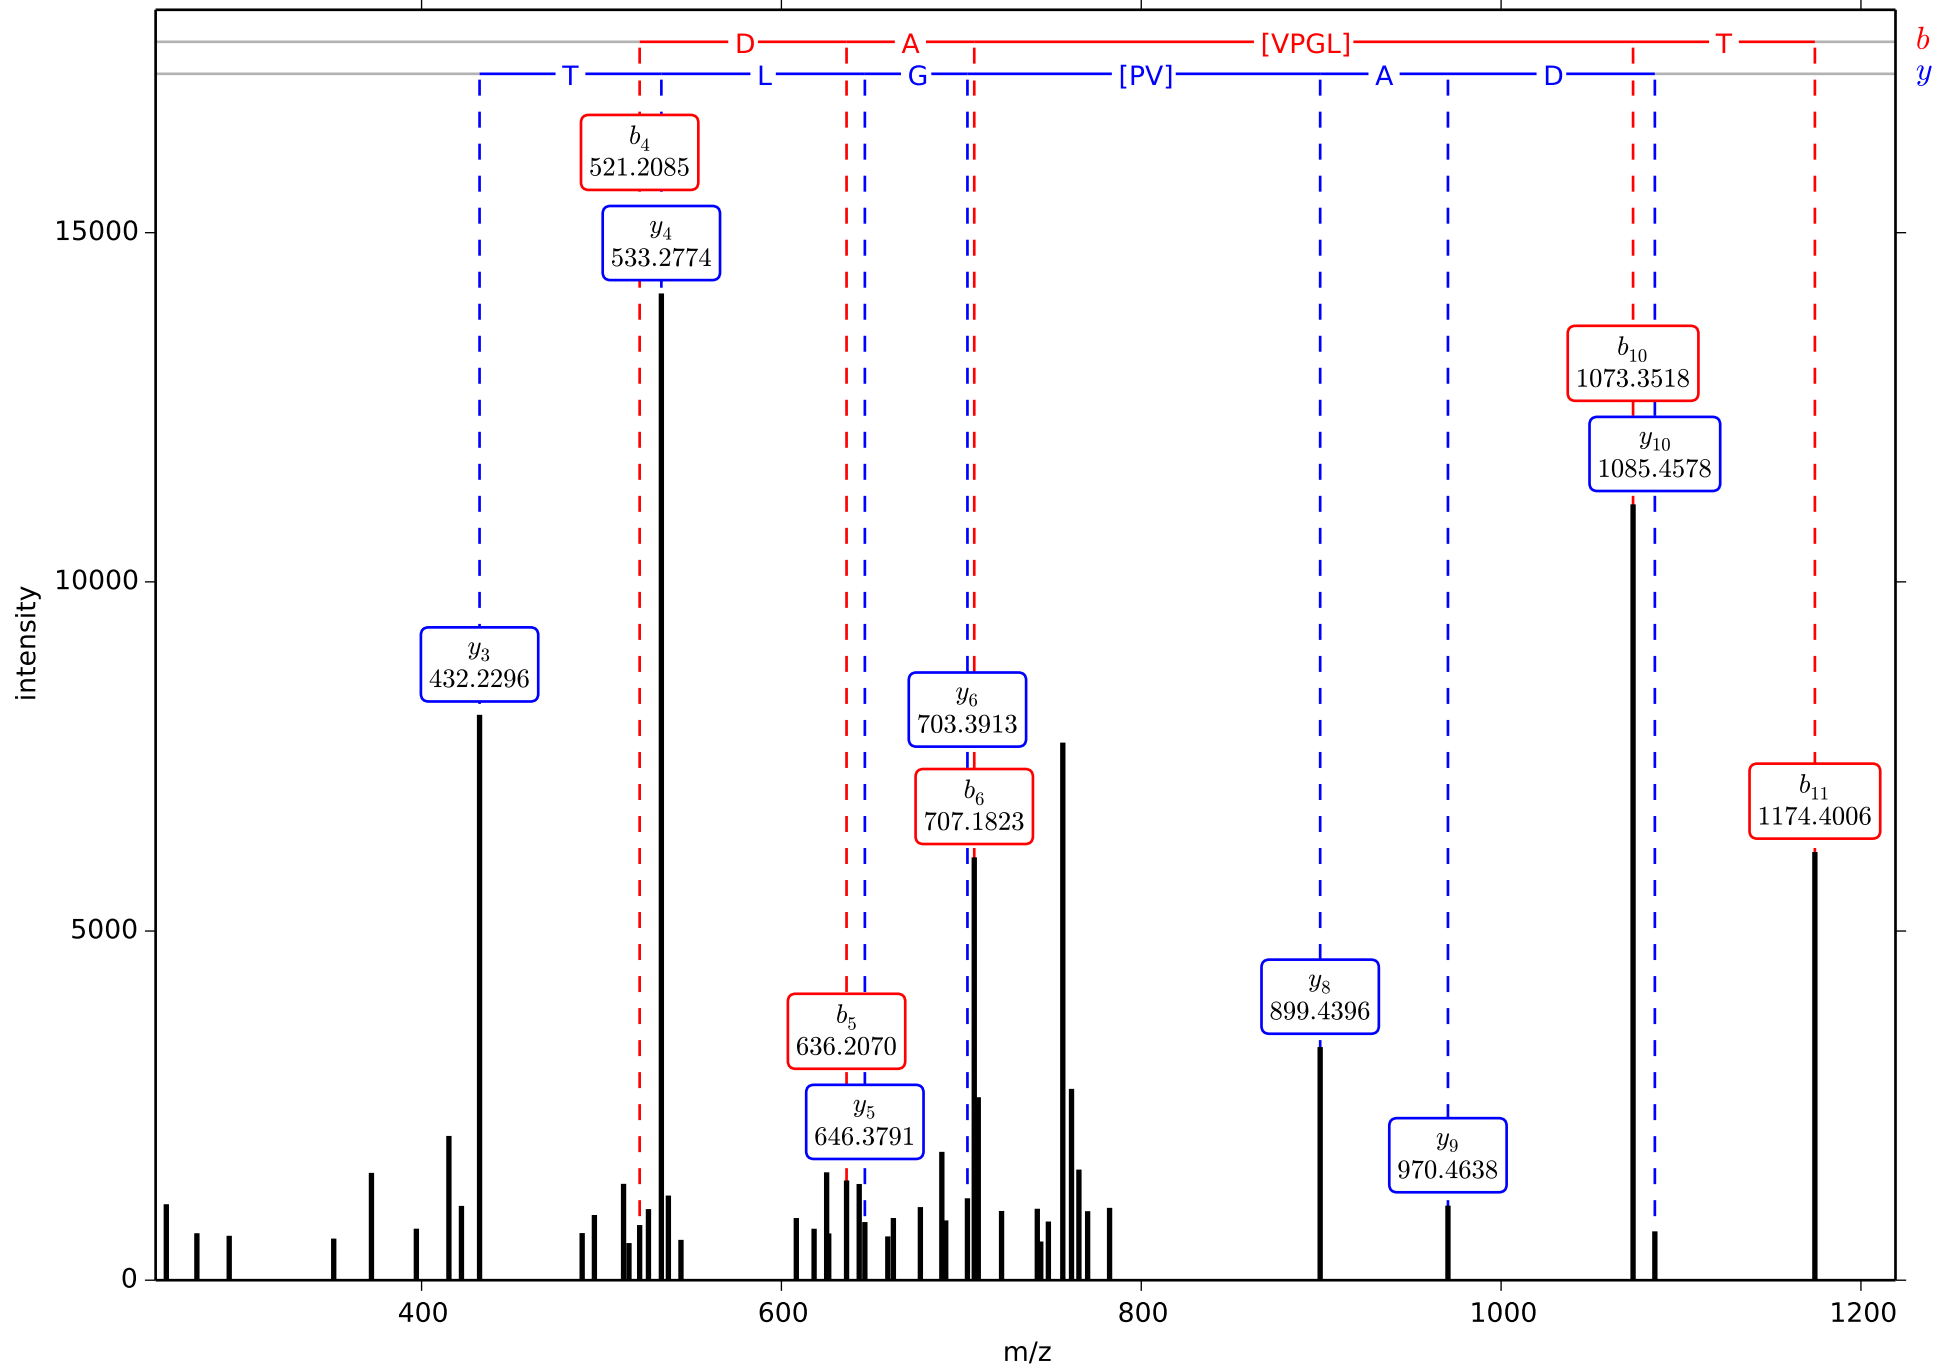

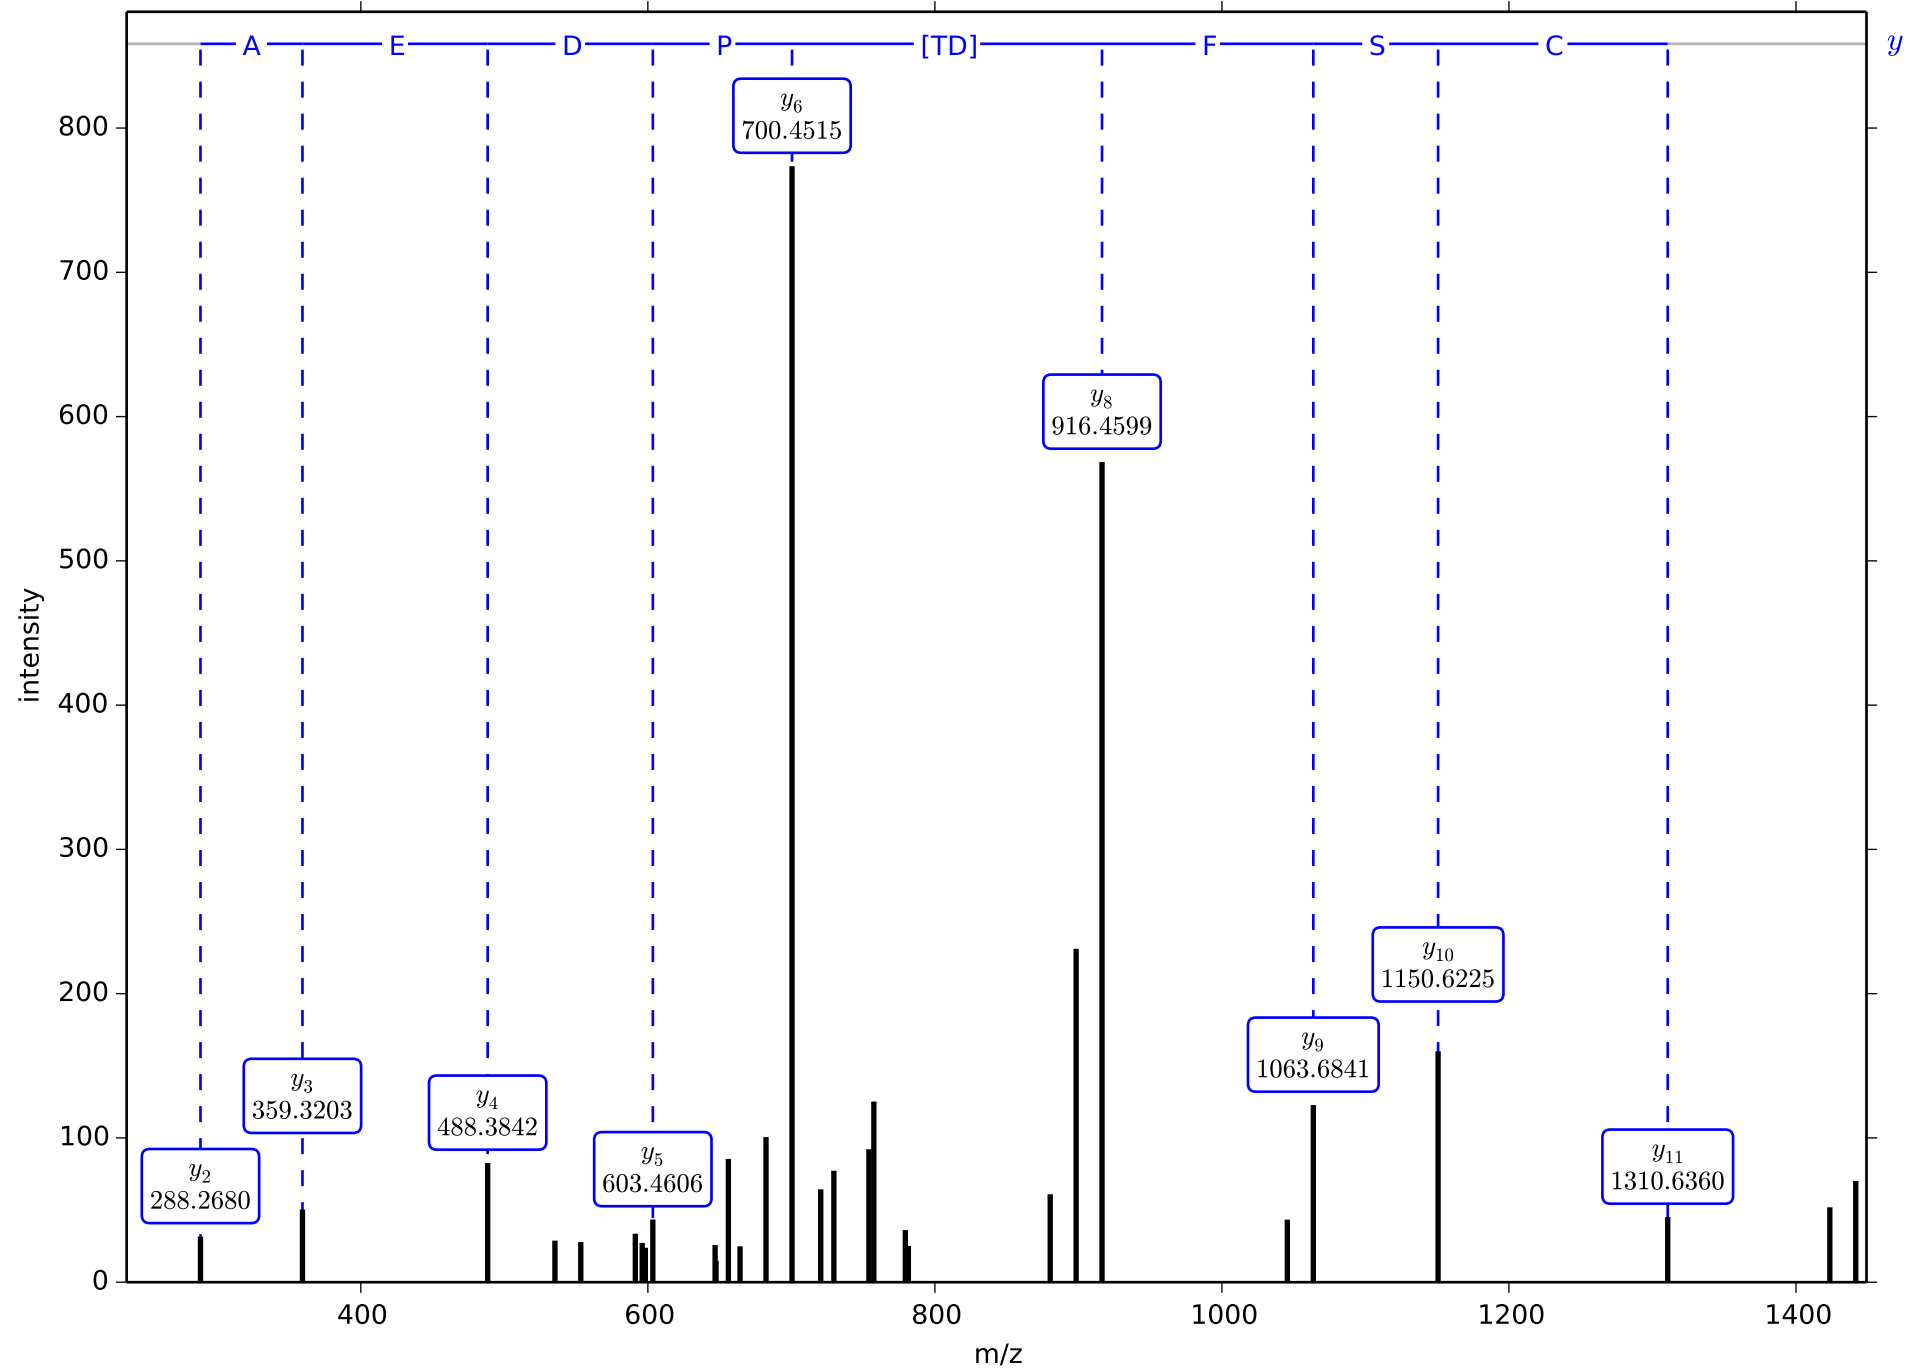

P61922 : CLEEVEDLIVK

parent: 673.858410,2+

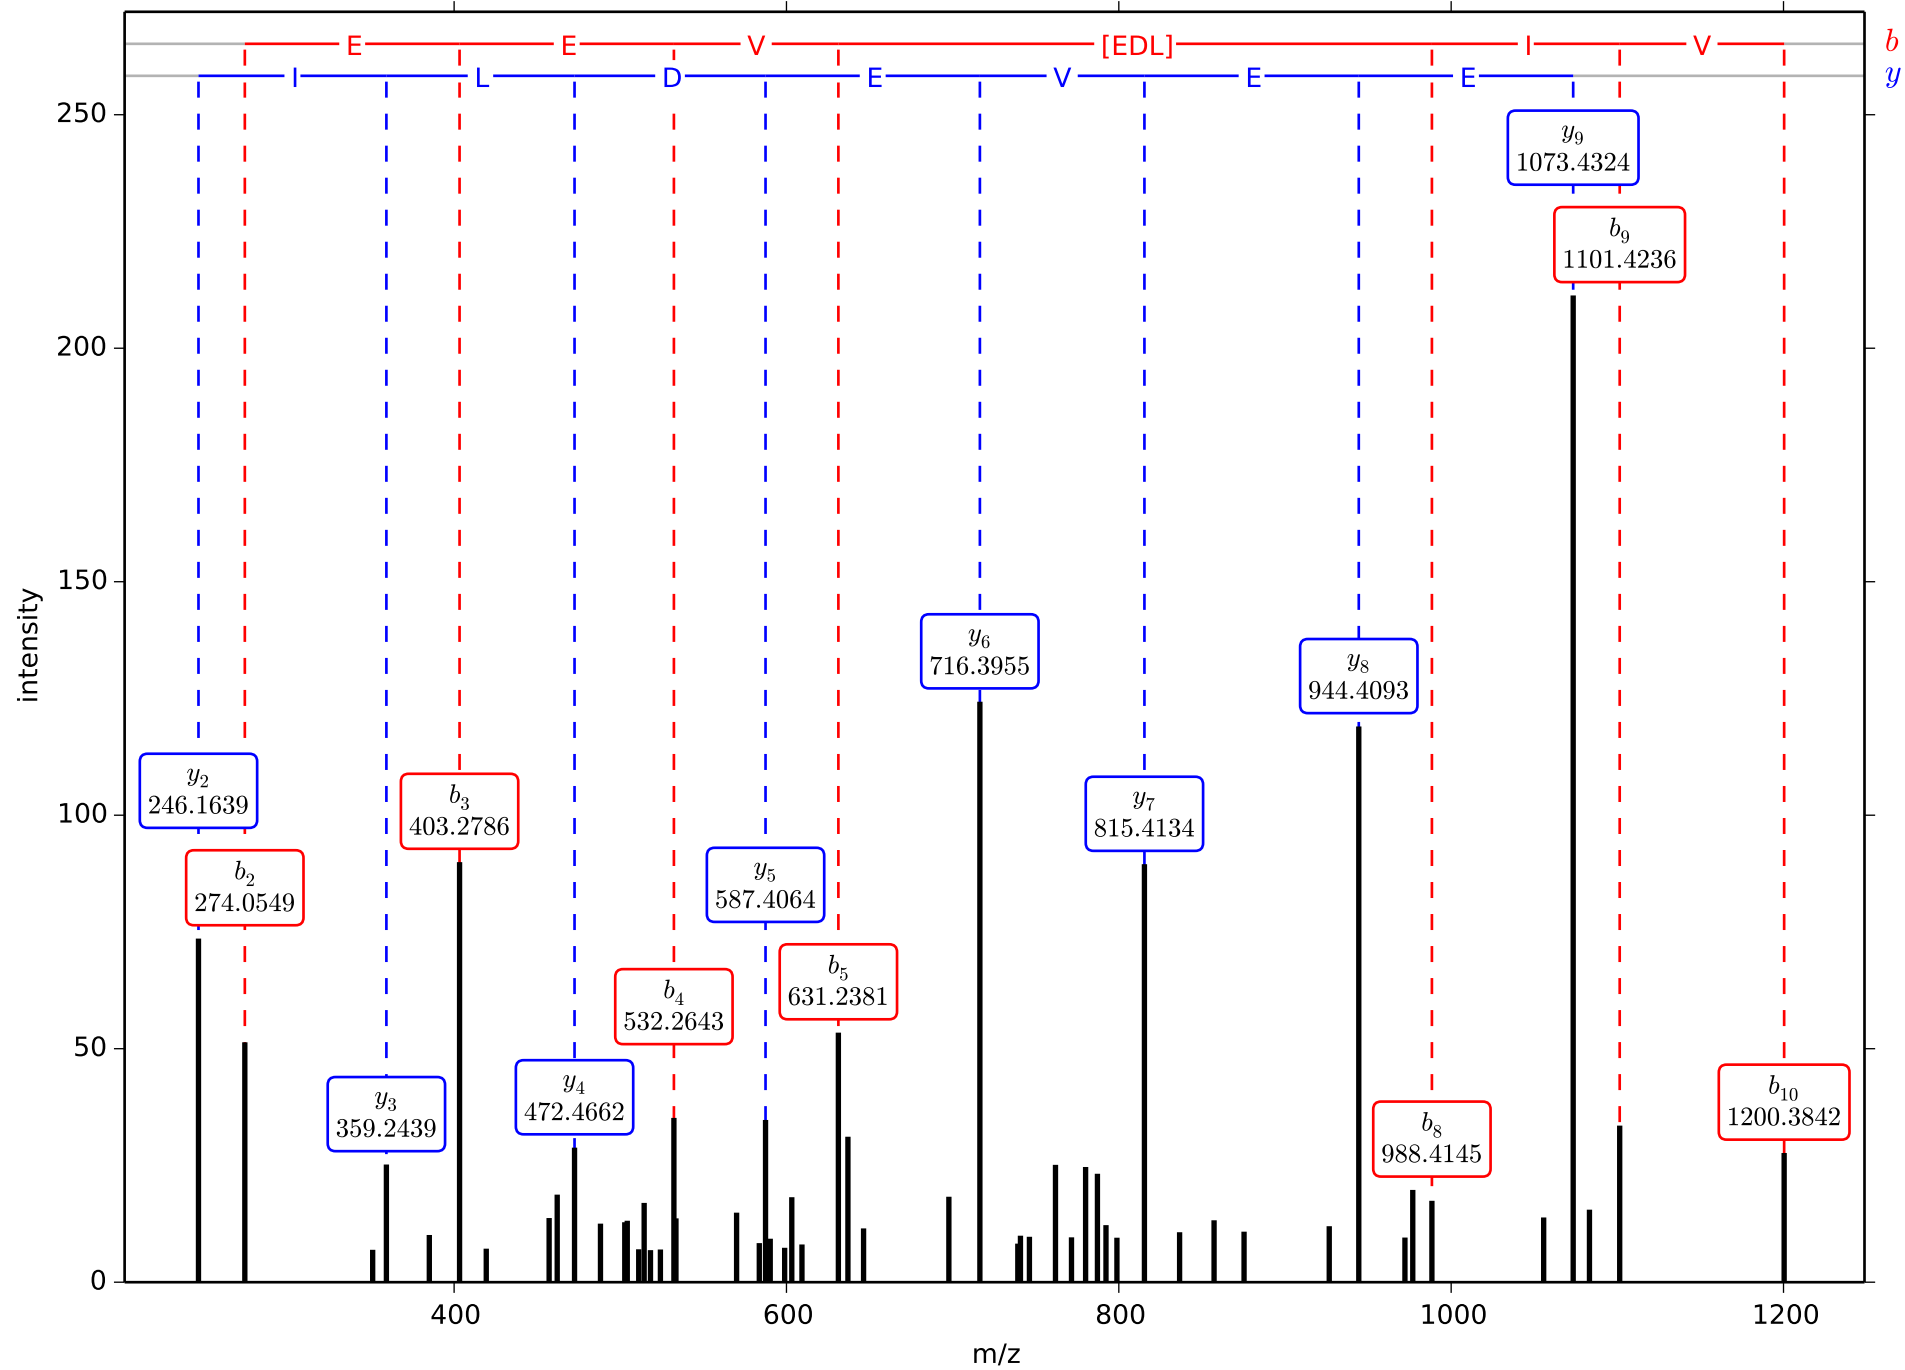

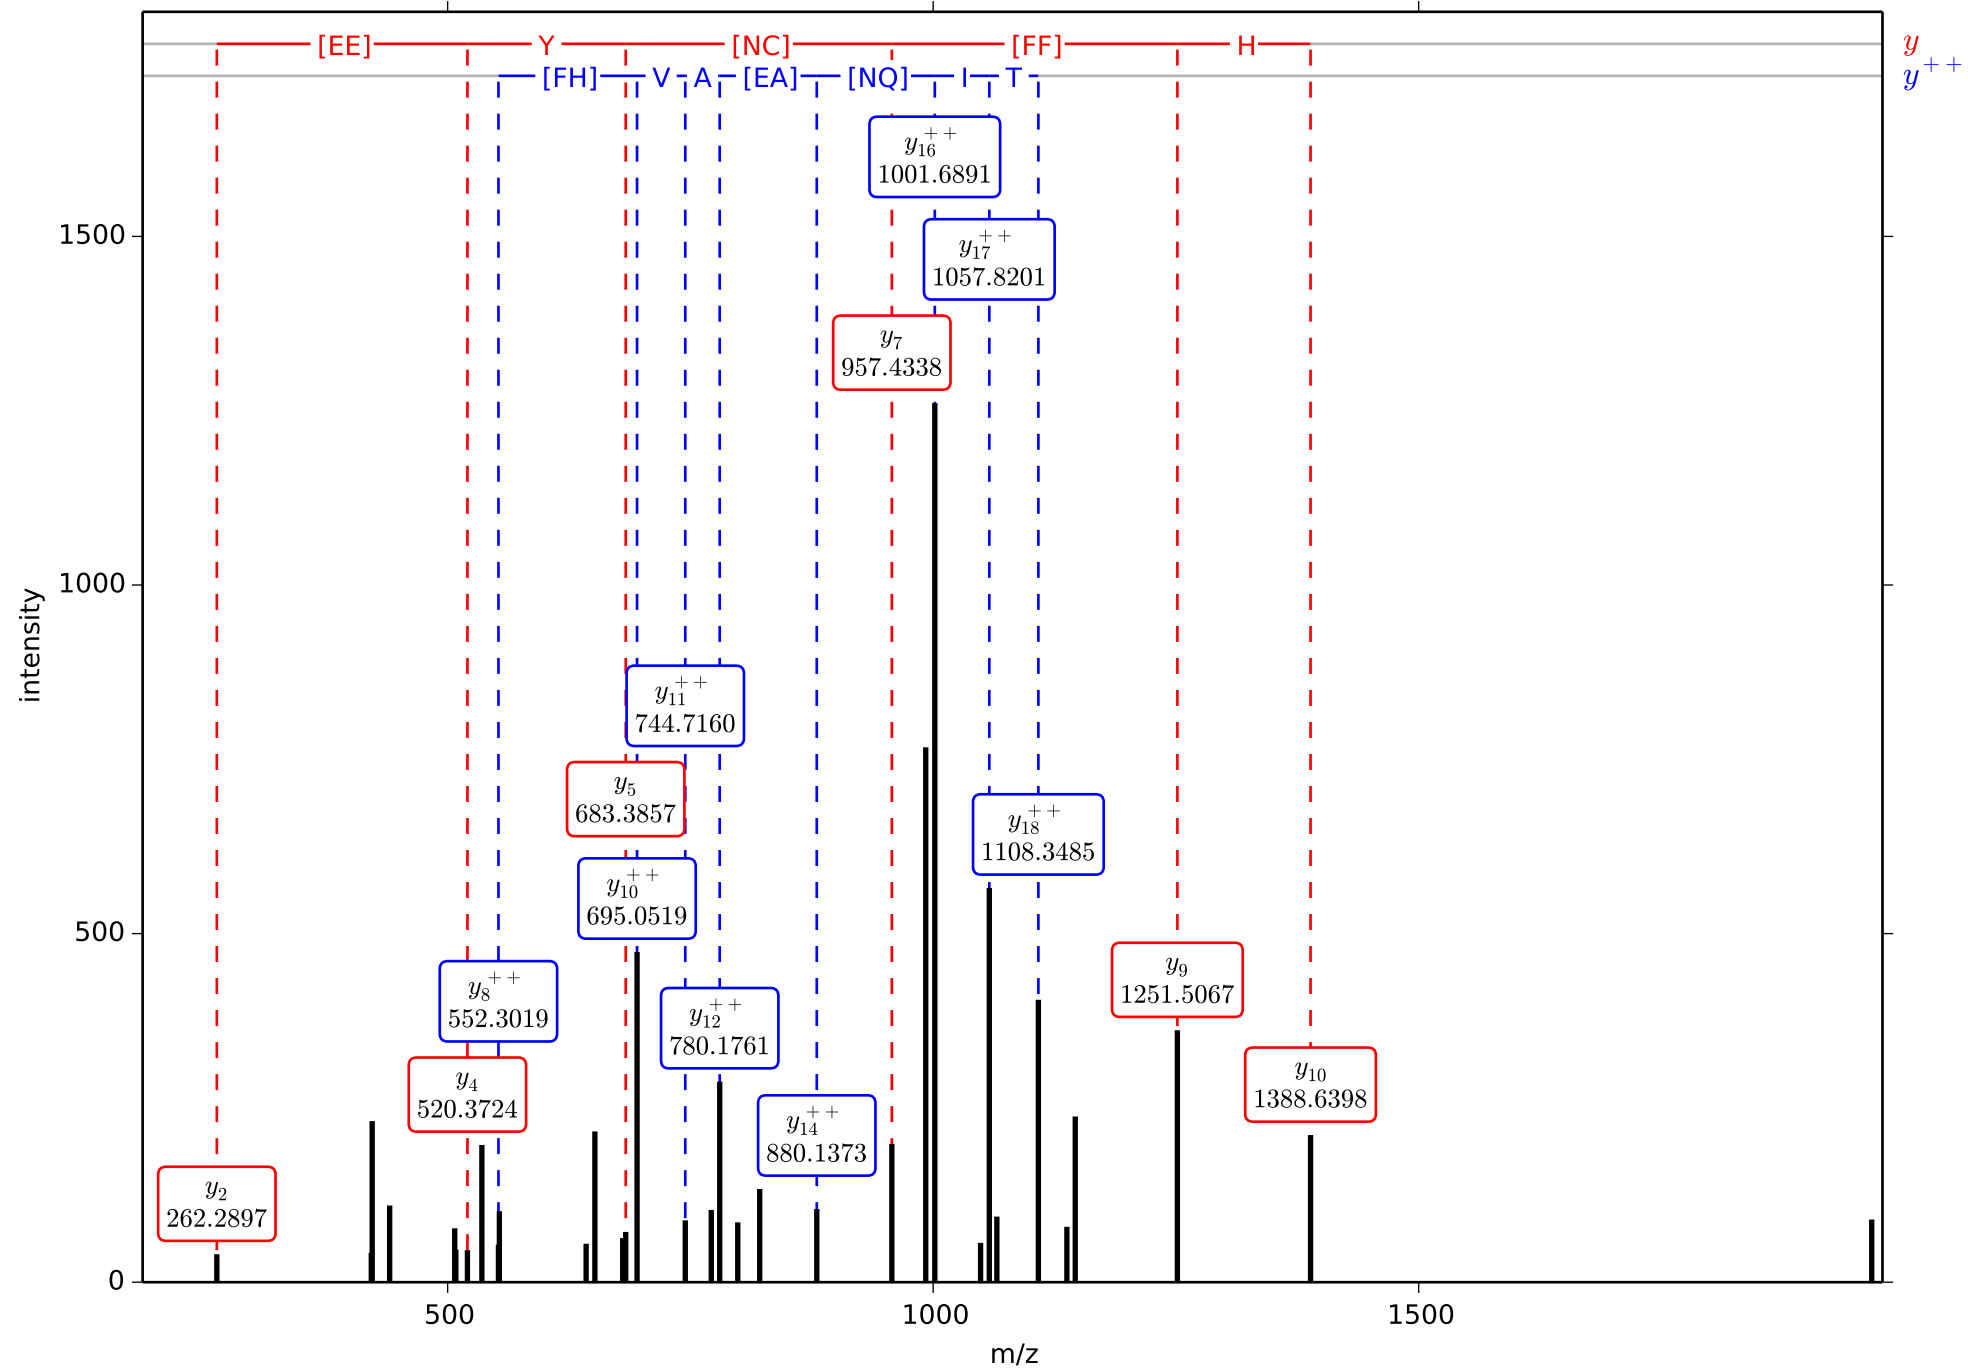

P68369 : AYHEQLSVAEITNACFEPANQMVK

parent: 1375.668400,2+

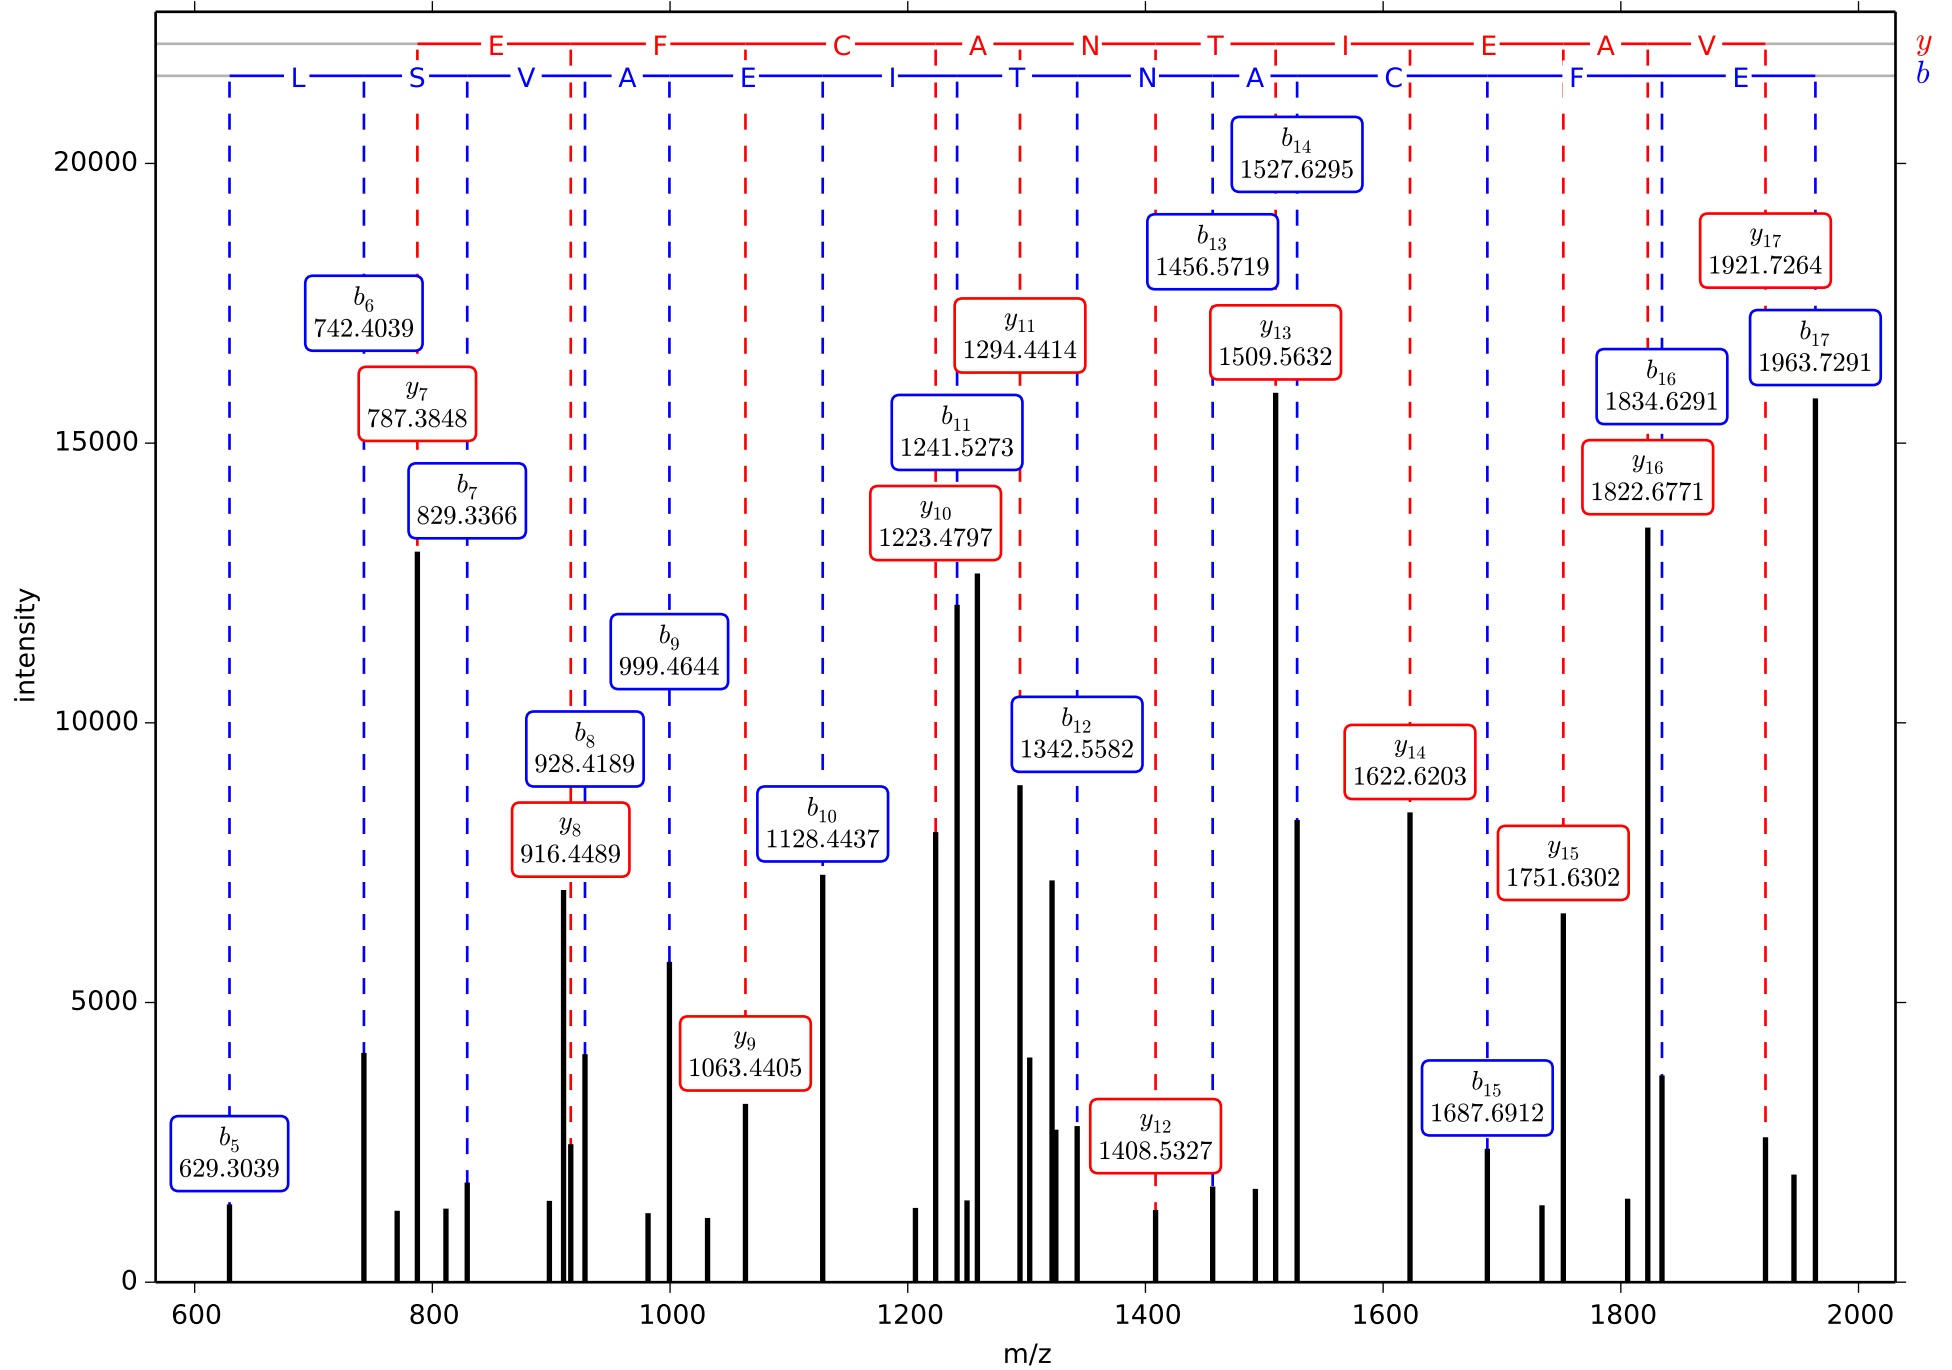

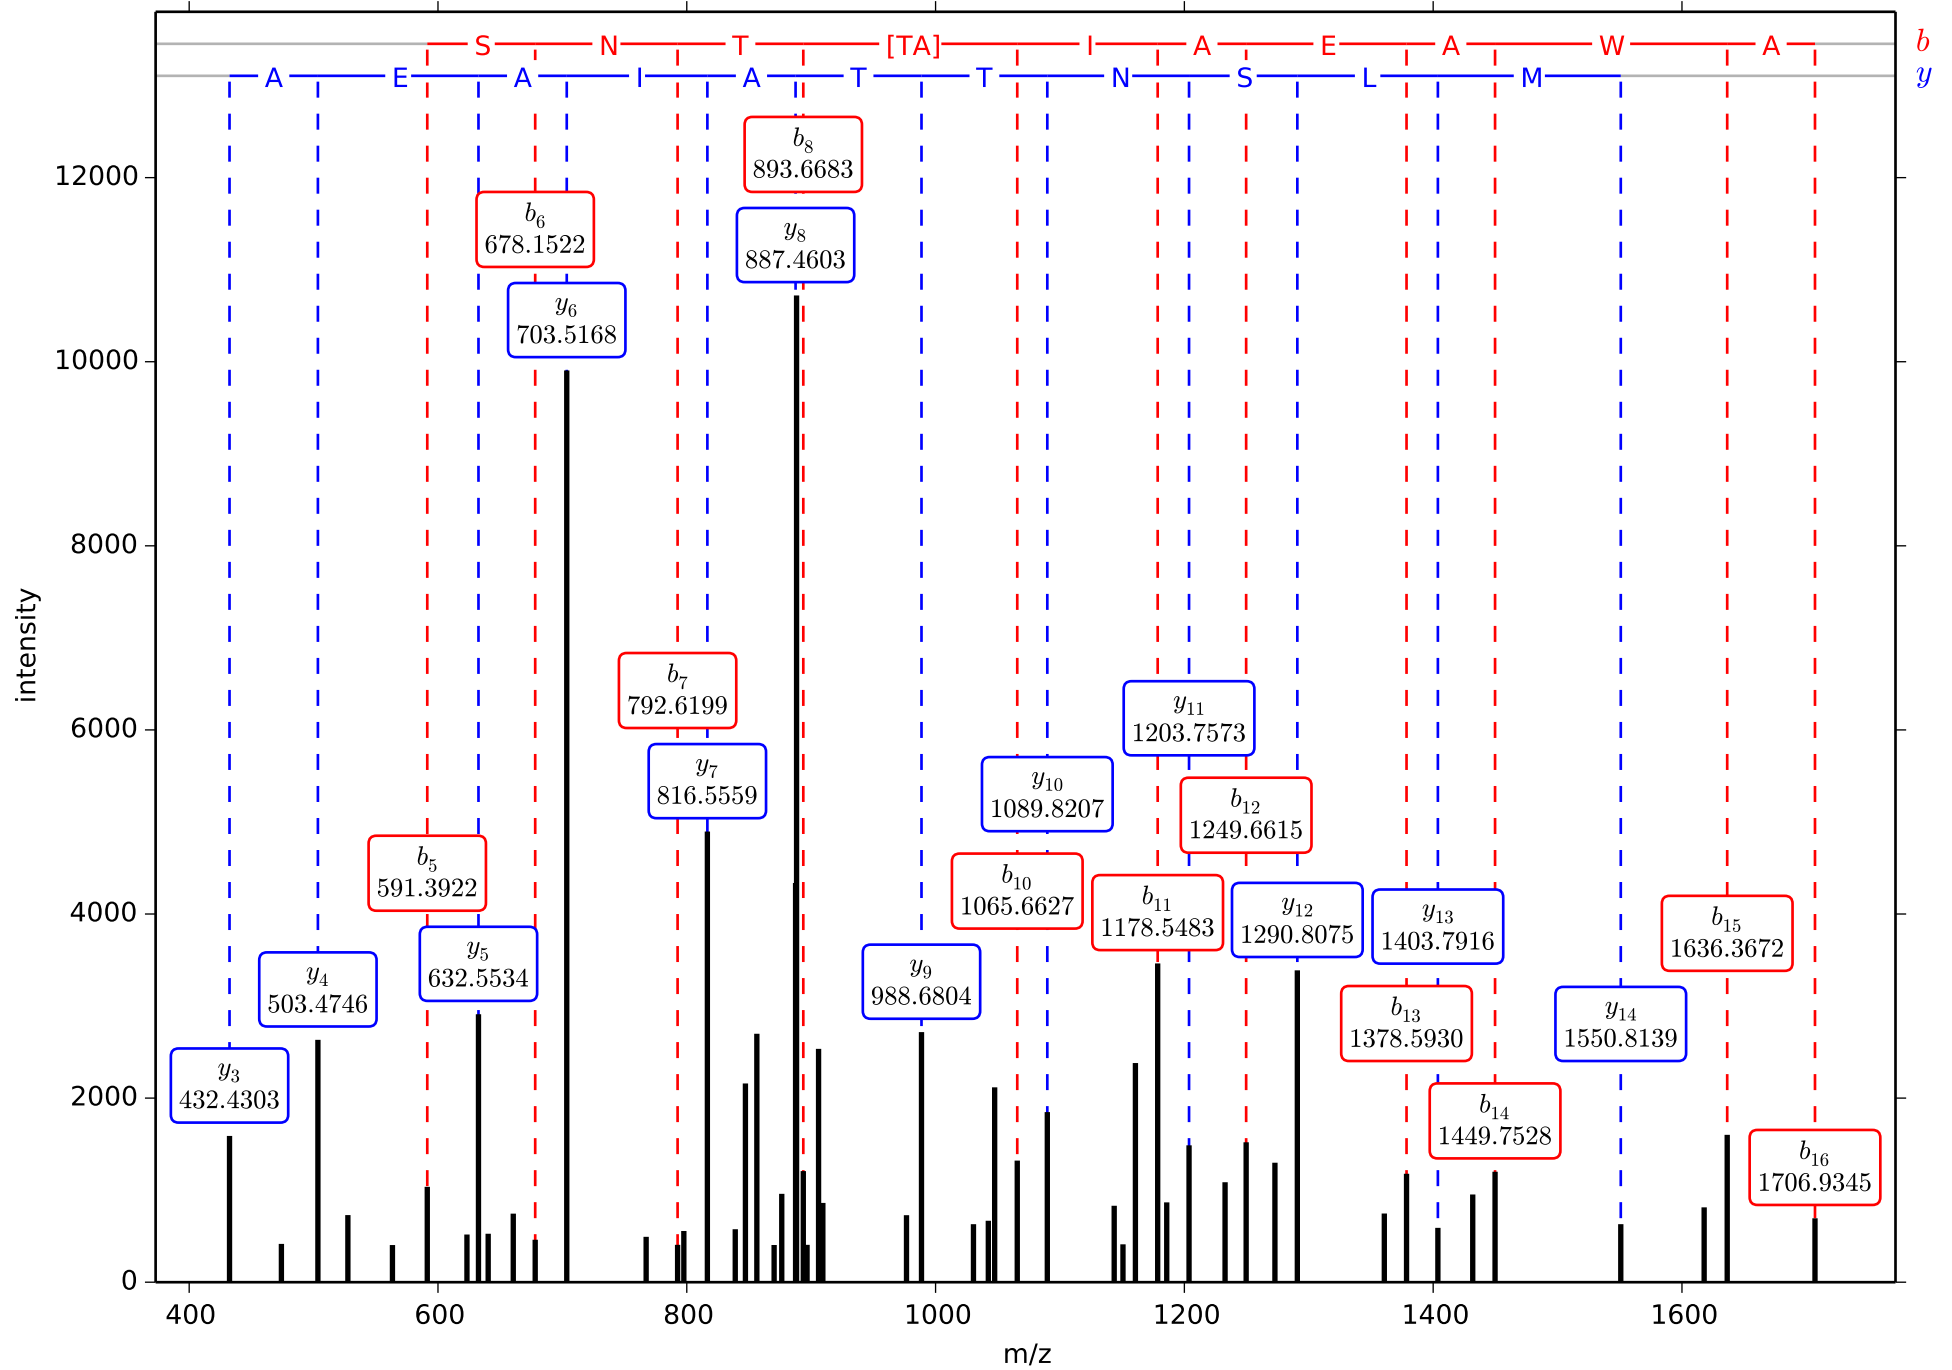

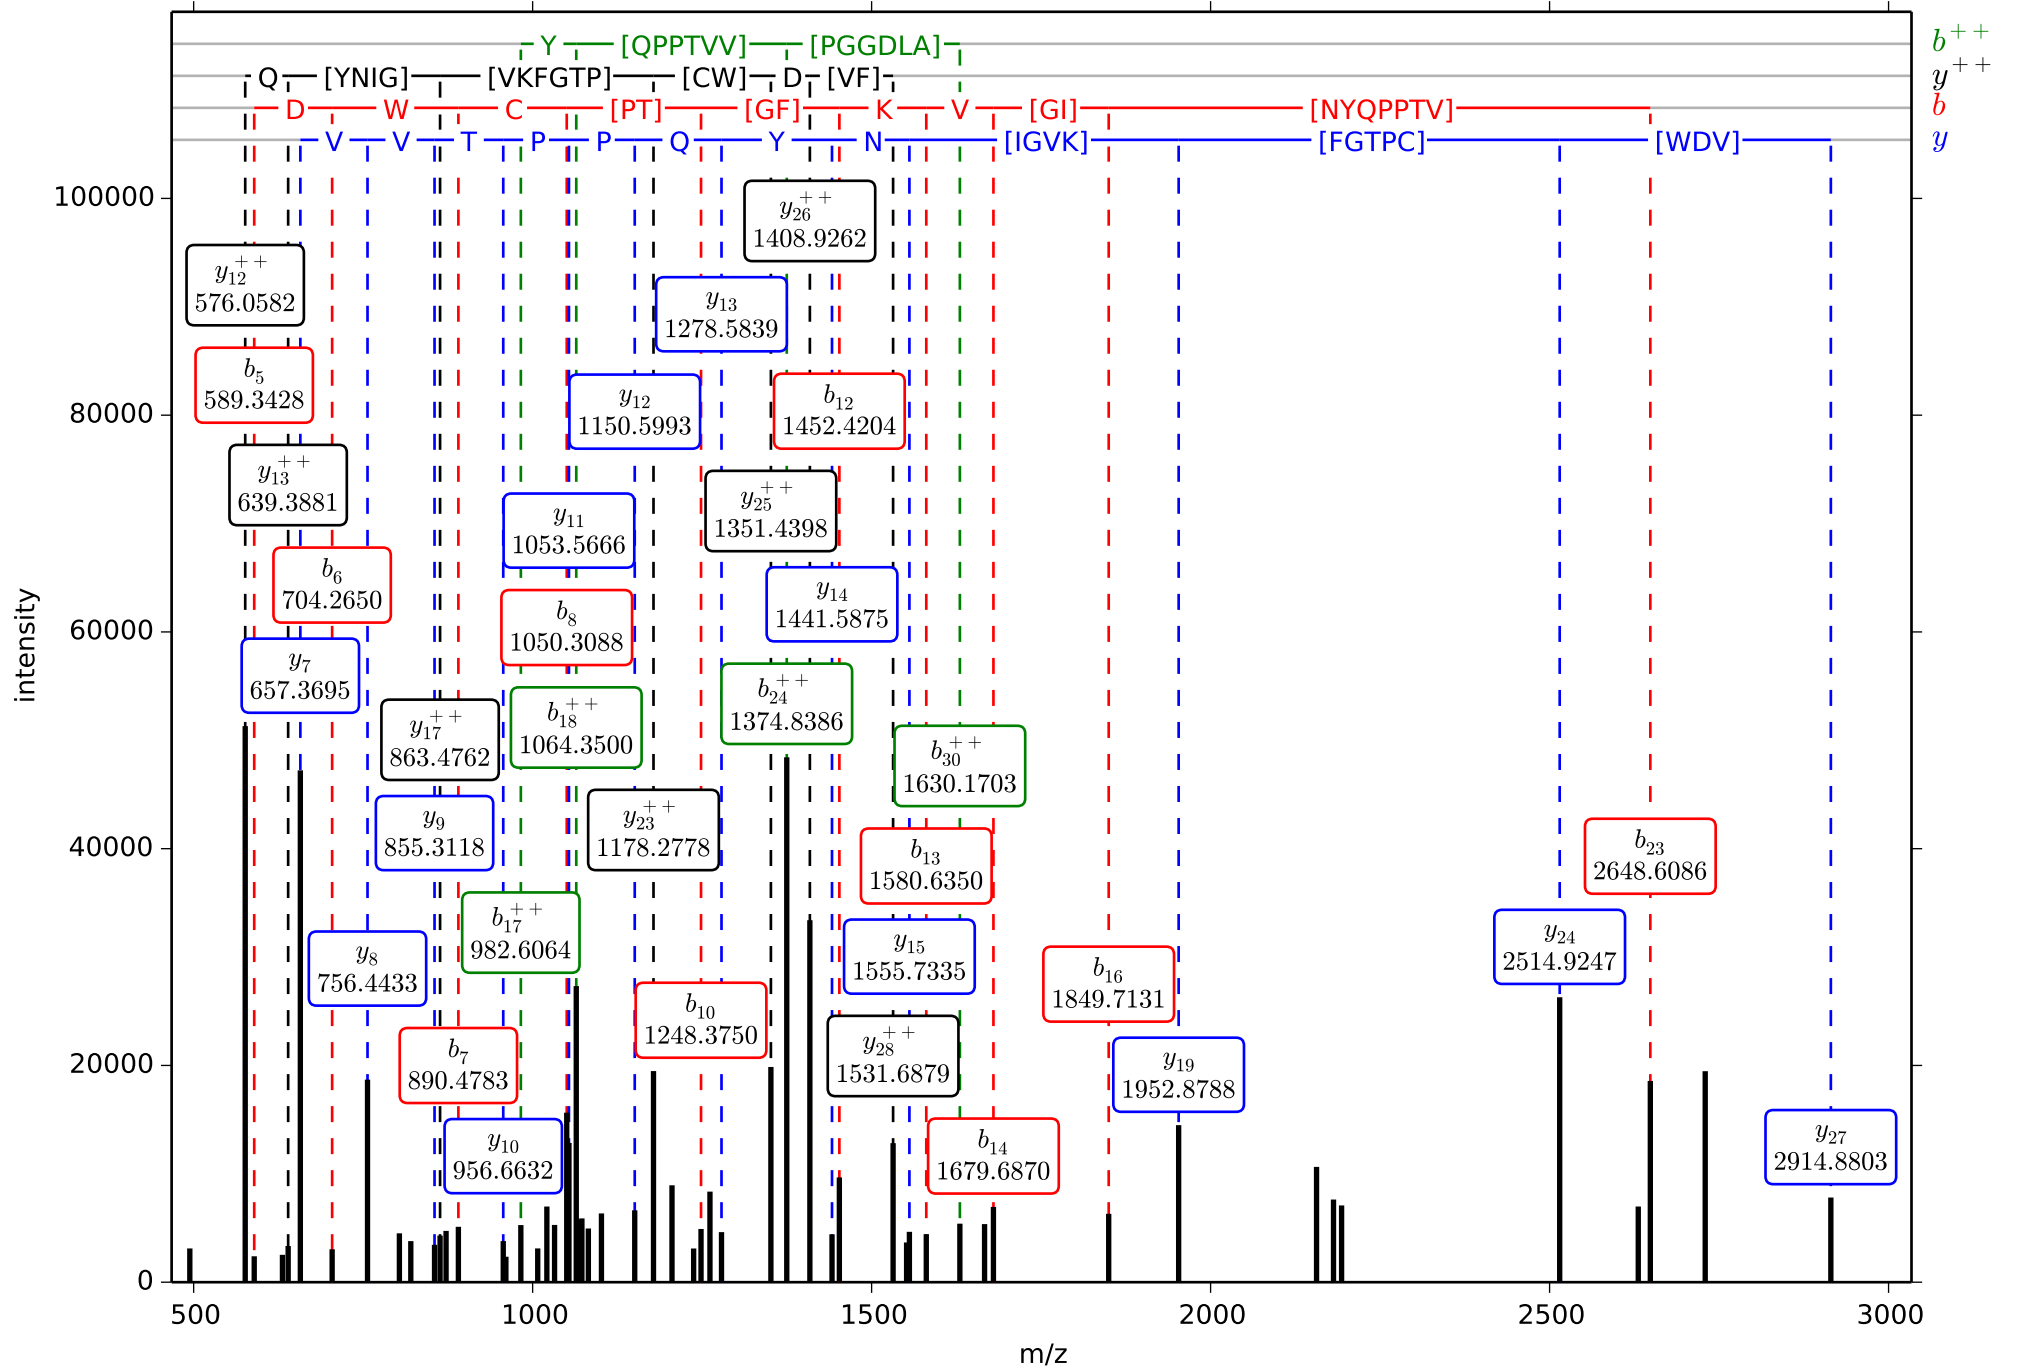

P68369 : TIQFVDWCPTGFK

parent: 799.884090,2+

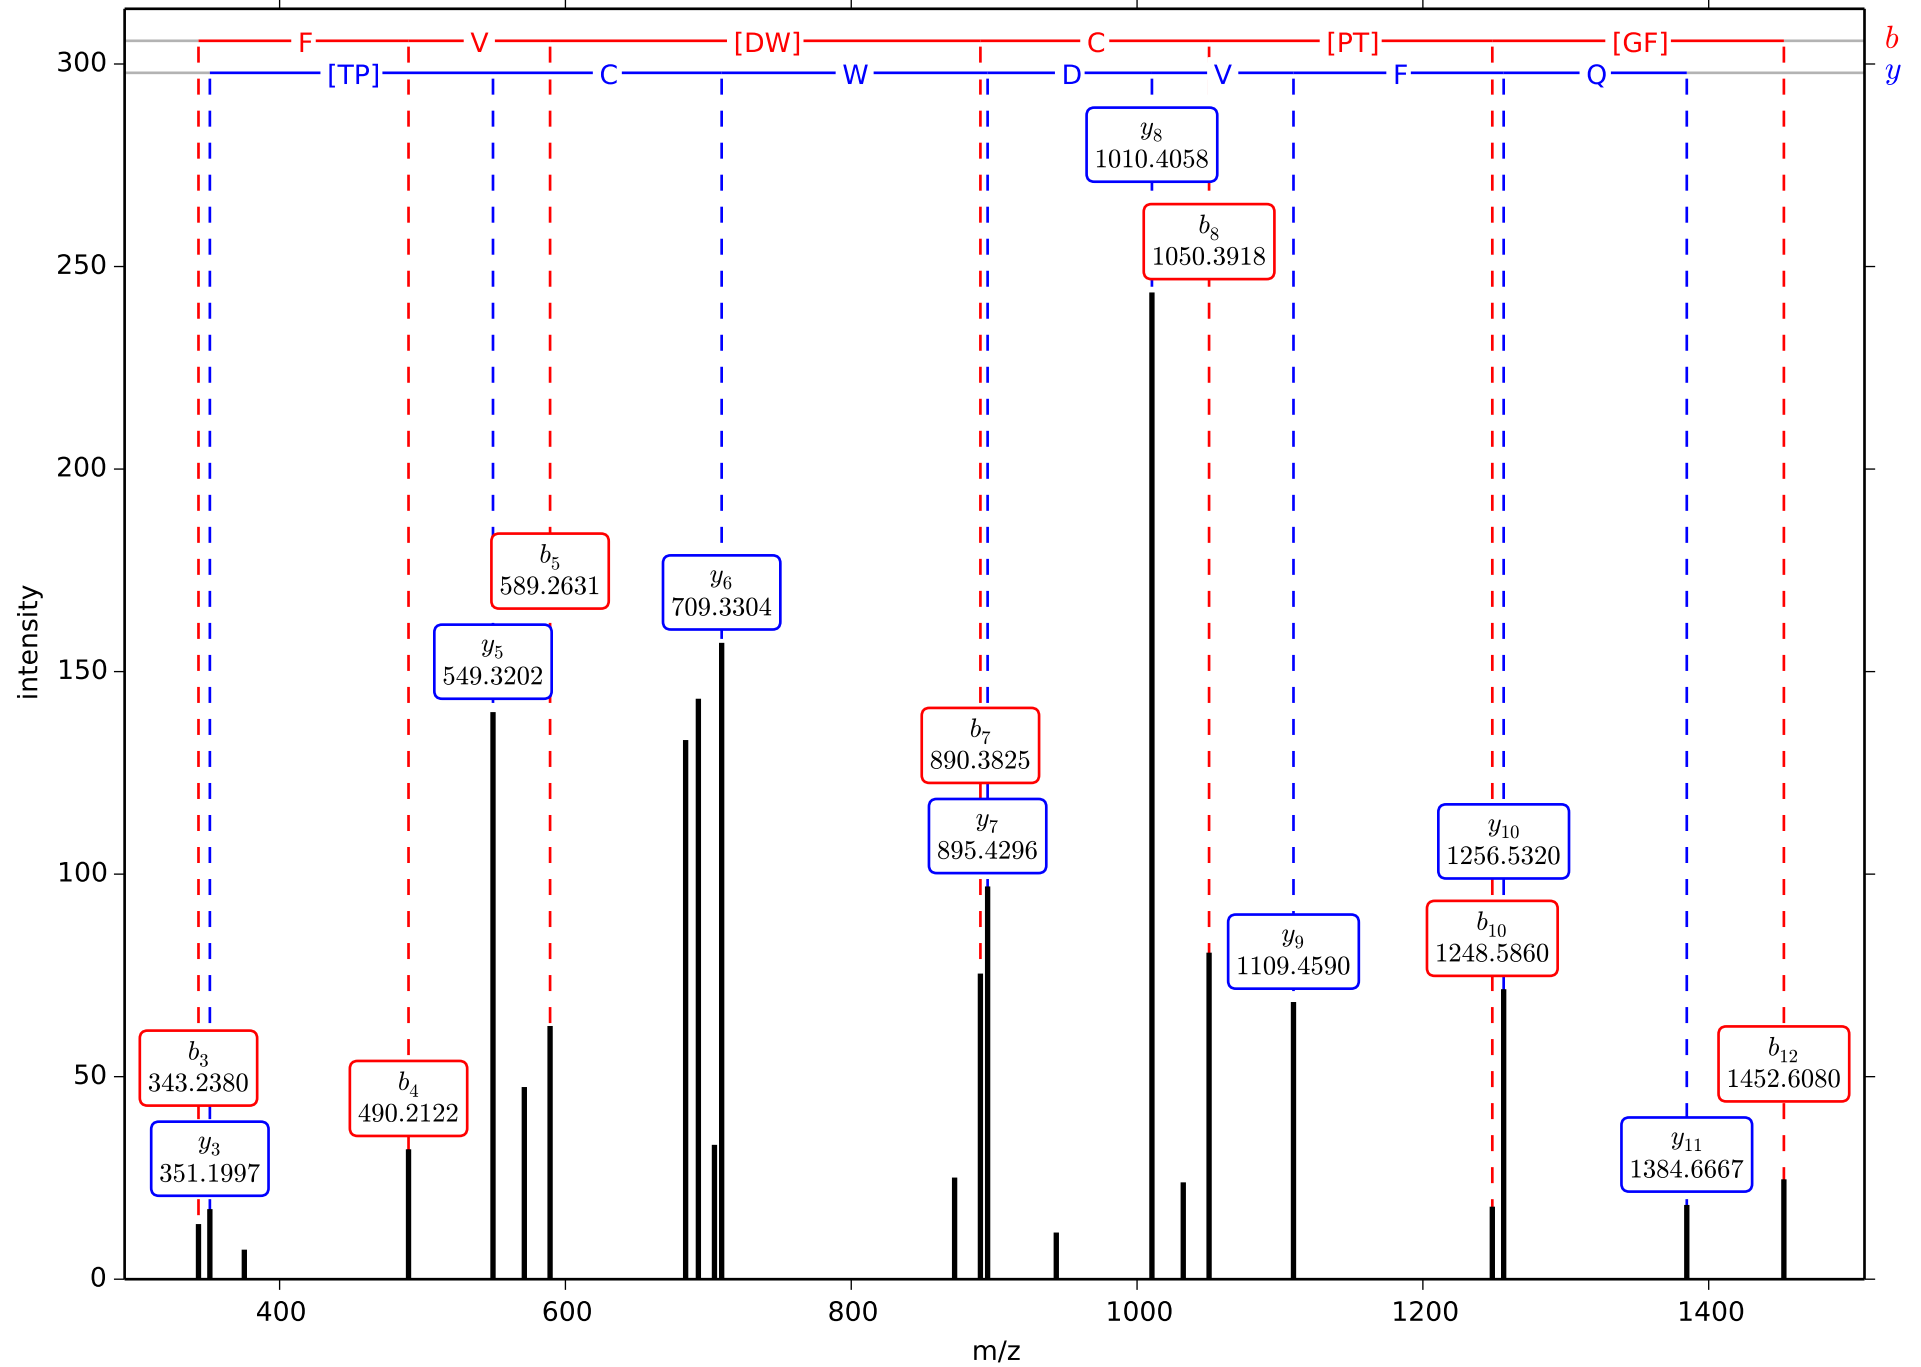



P62880 : ACGDSTLTQITAGLDPVGR

parent: 966.484820,2+

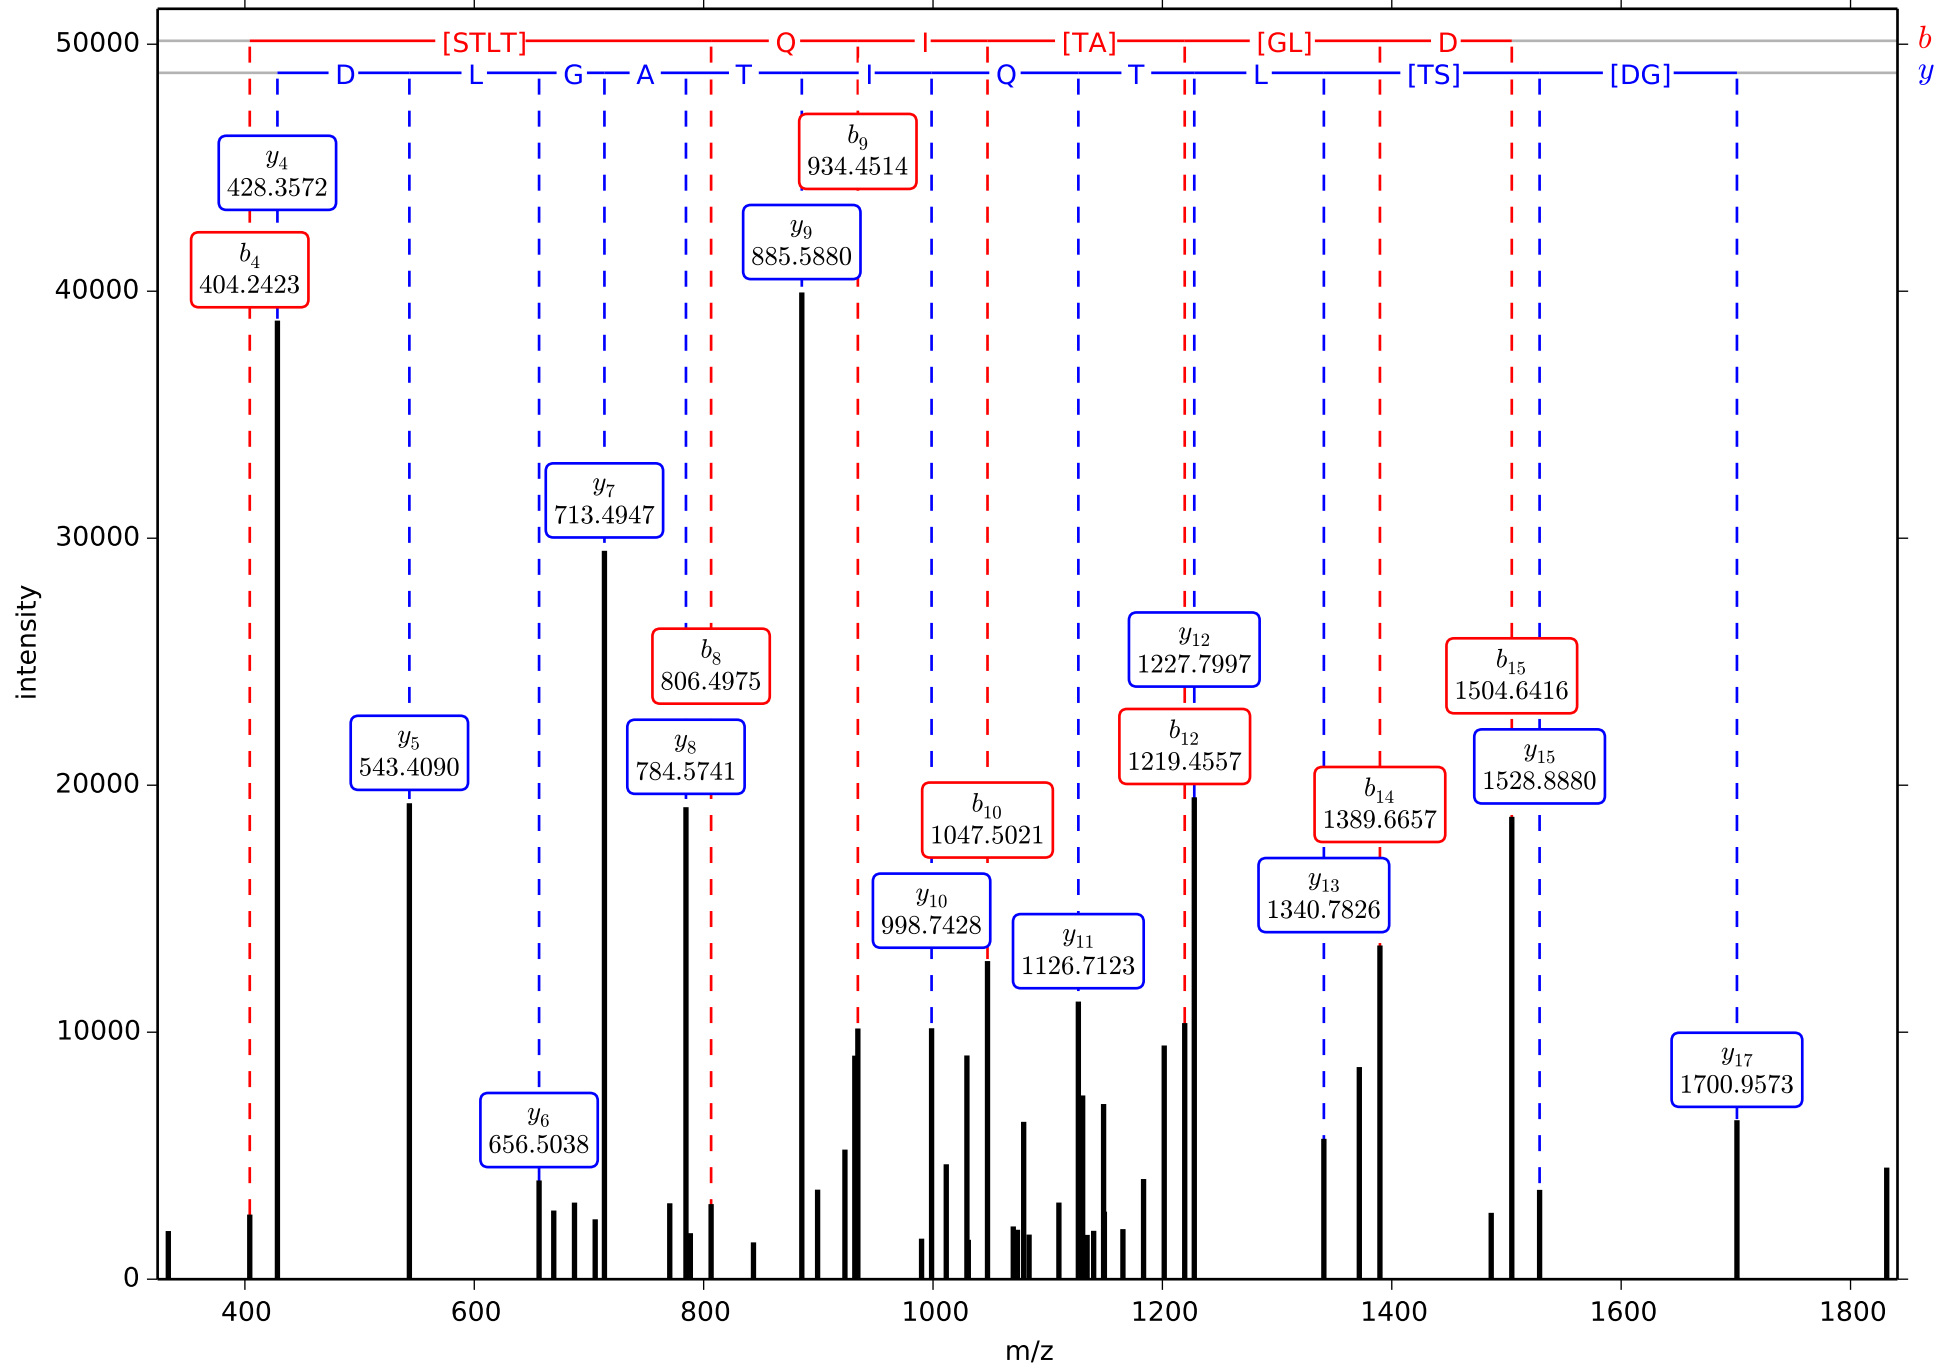

P62880 : TFVSGACDASIK

parent: 628.305380,2+

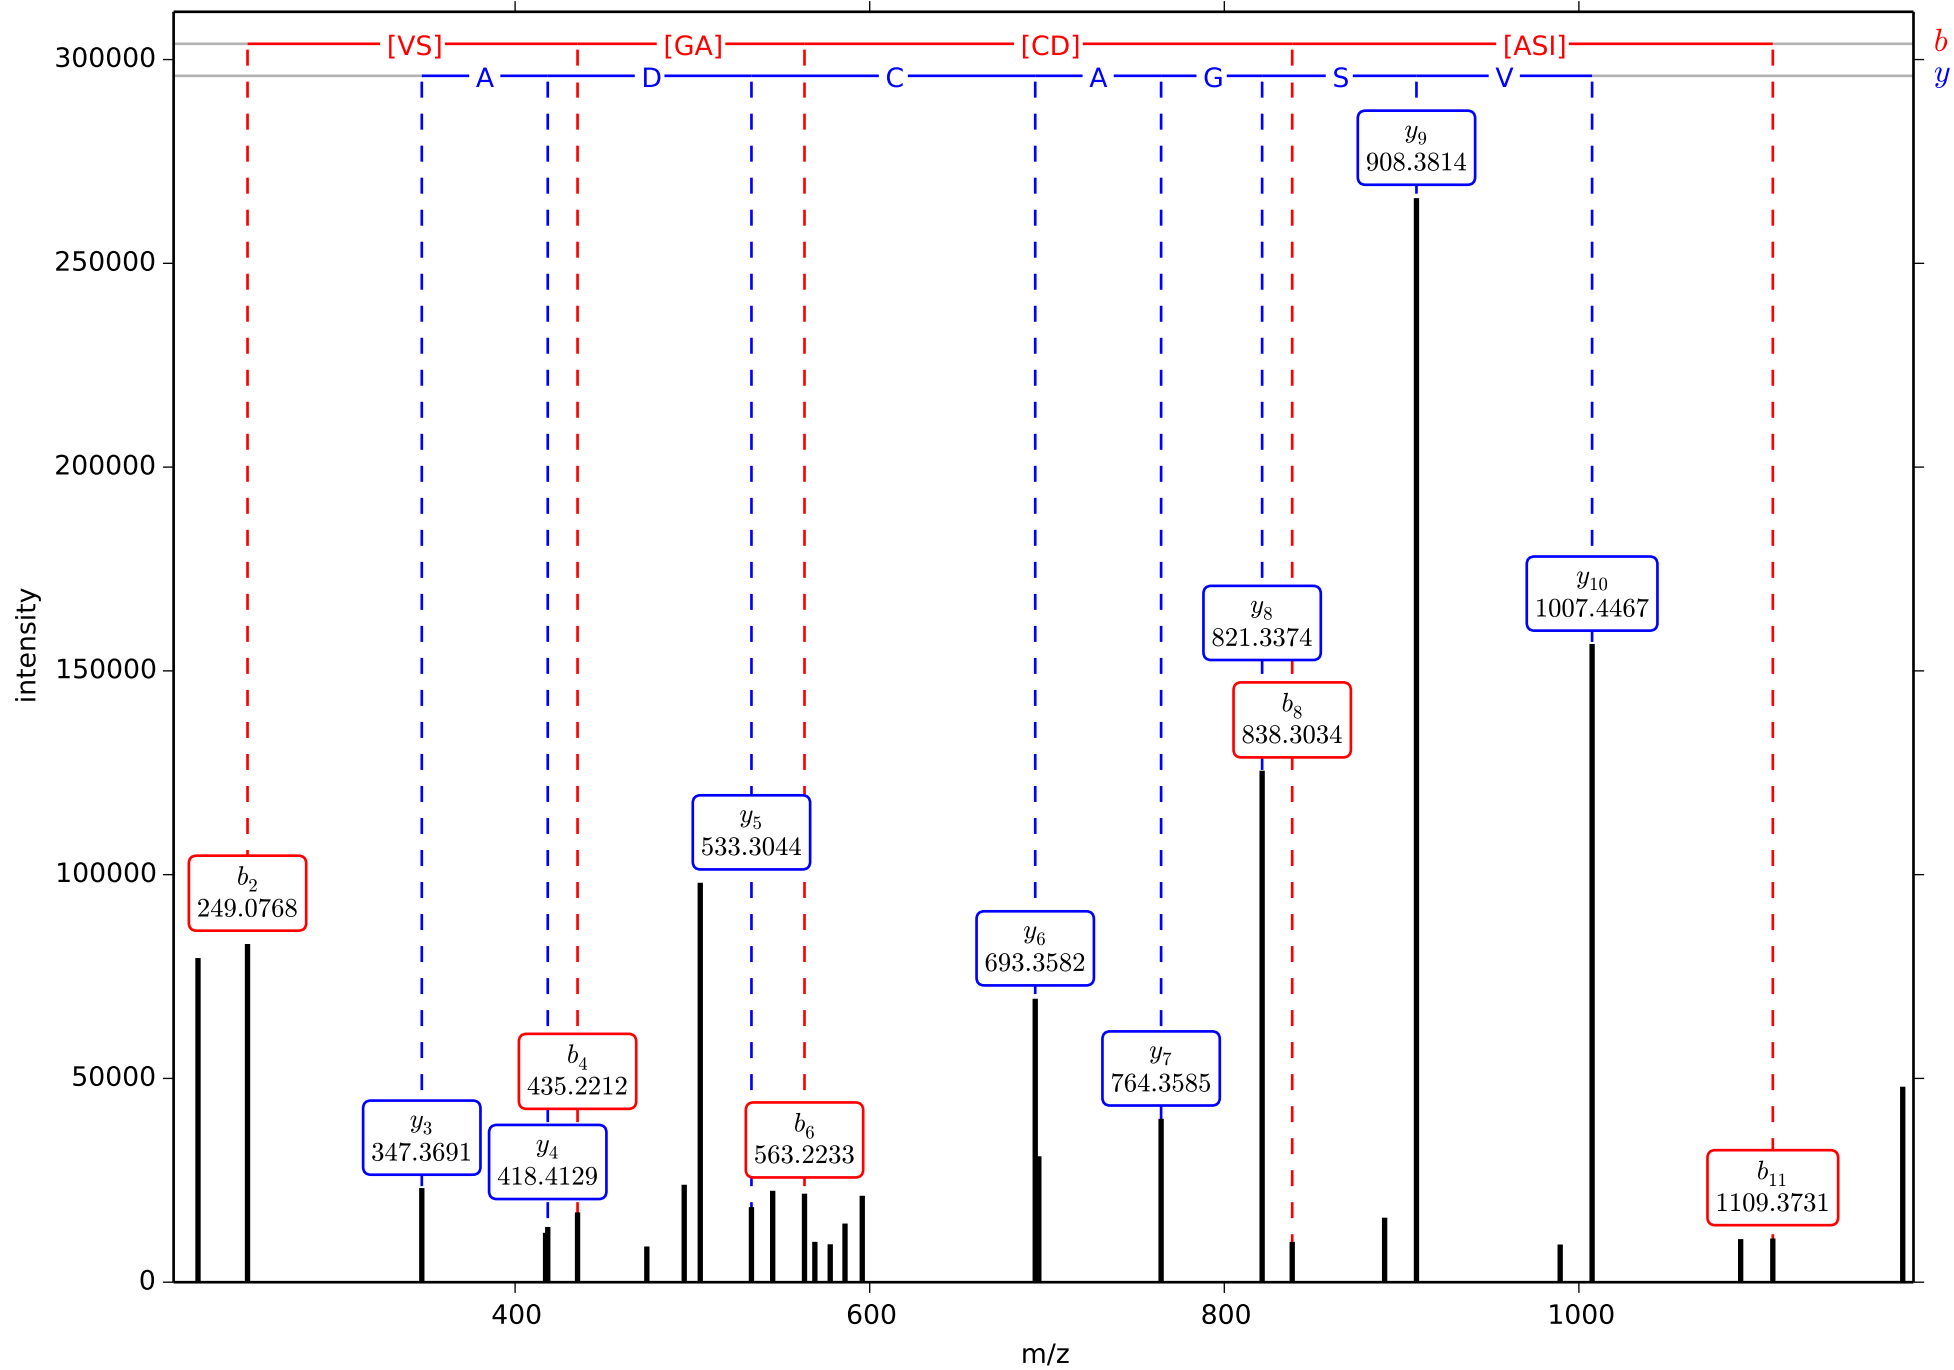

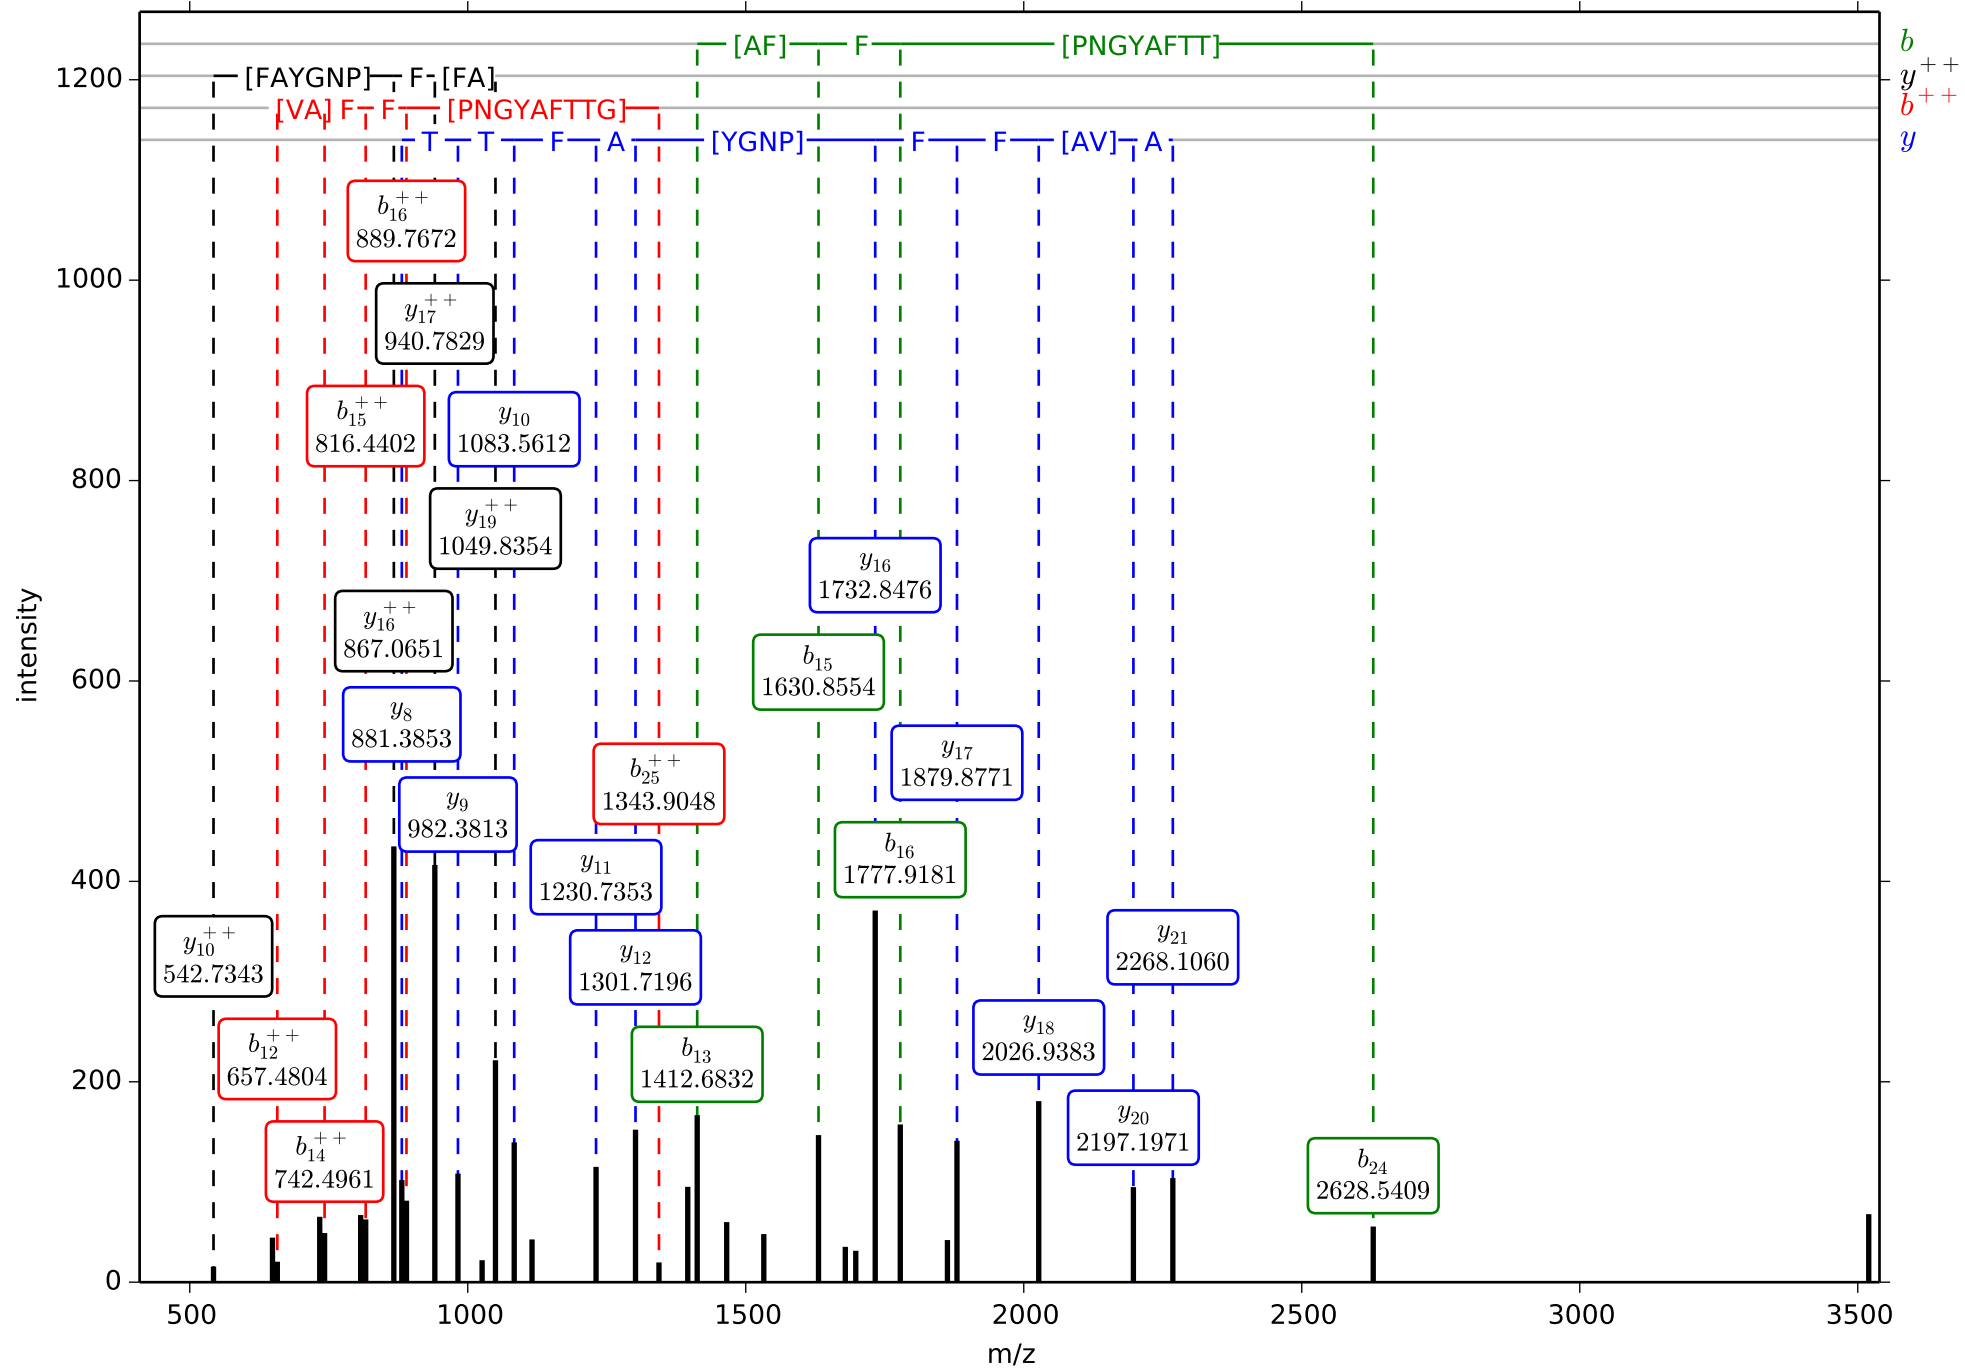

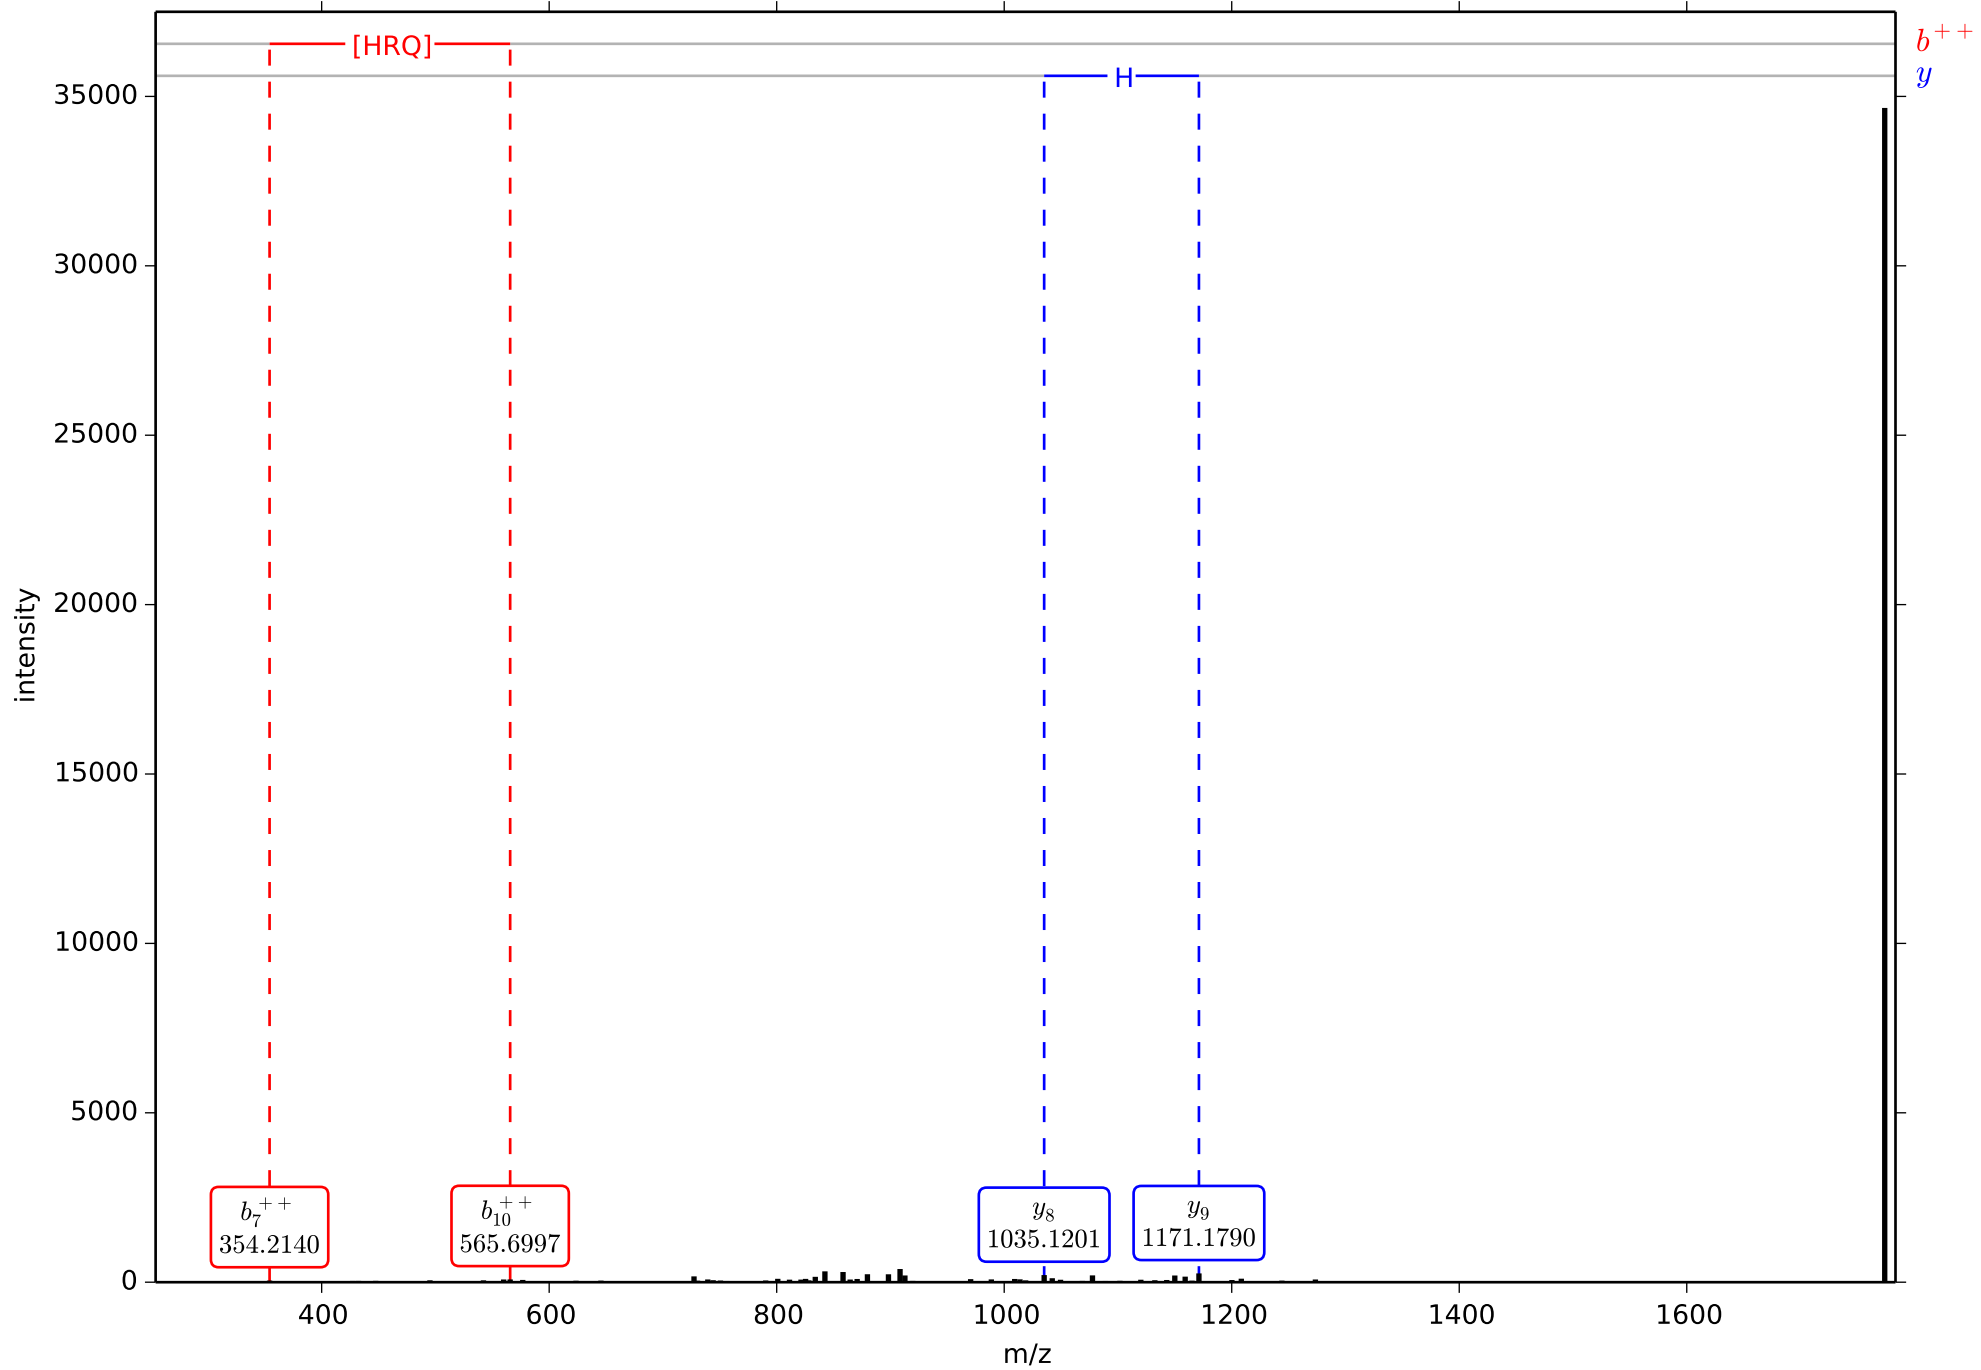

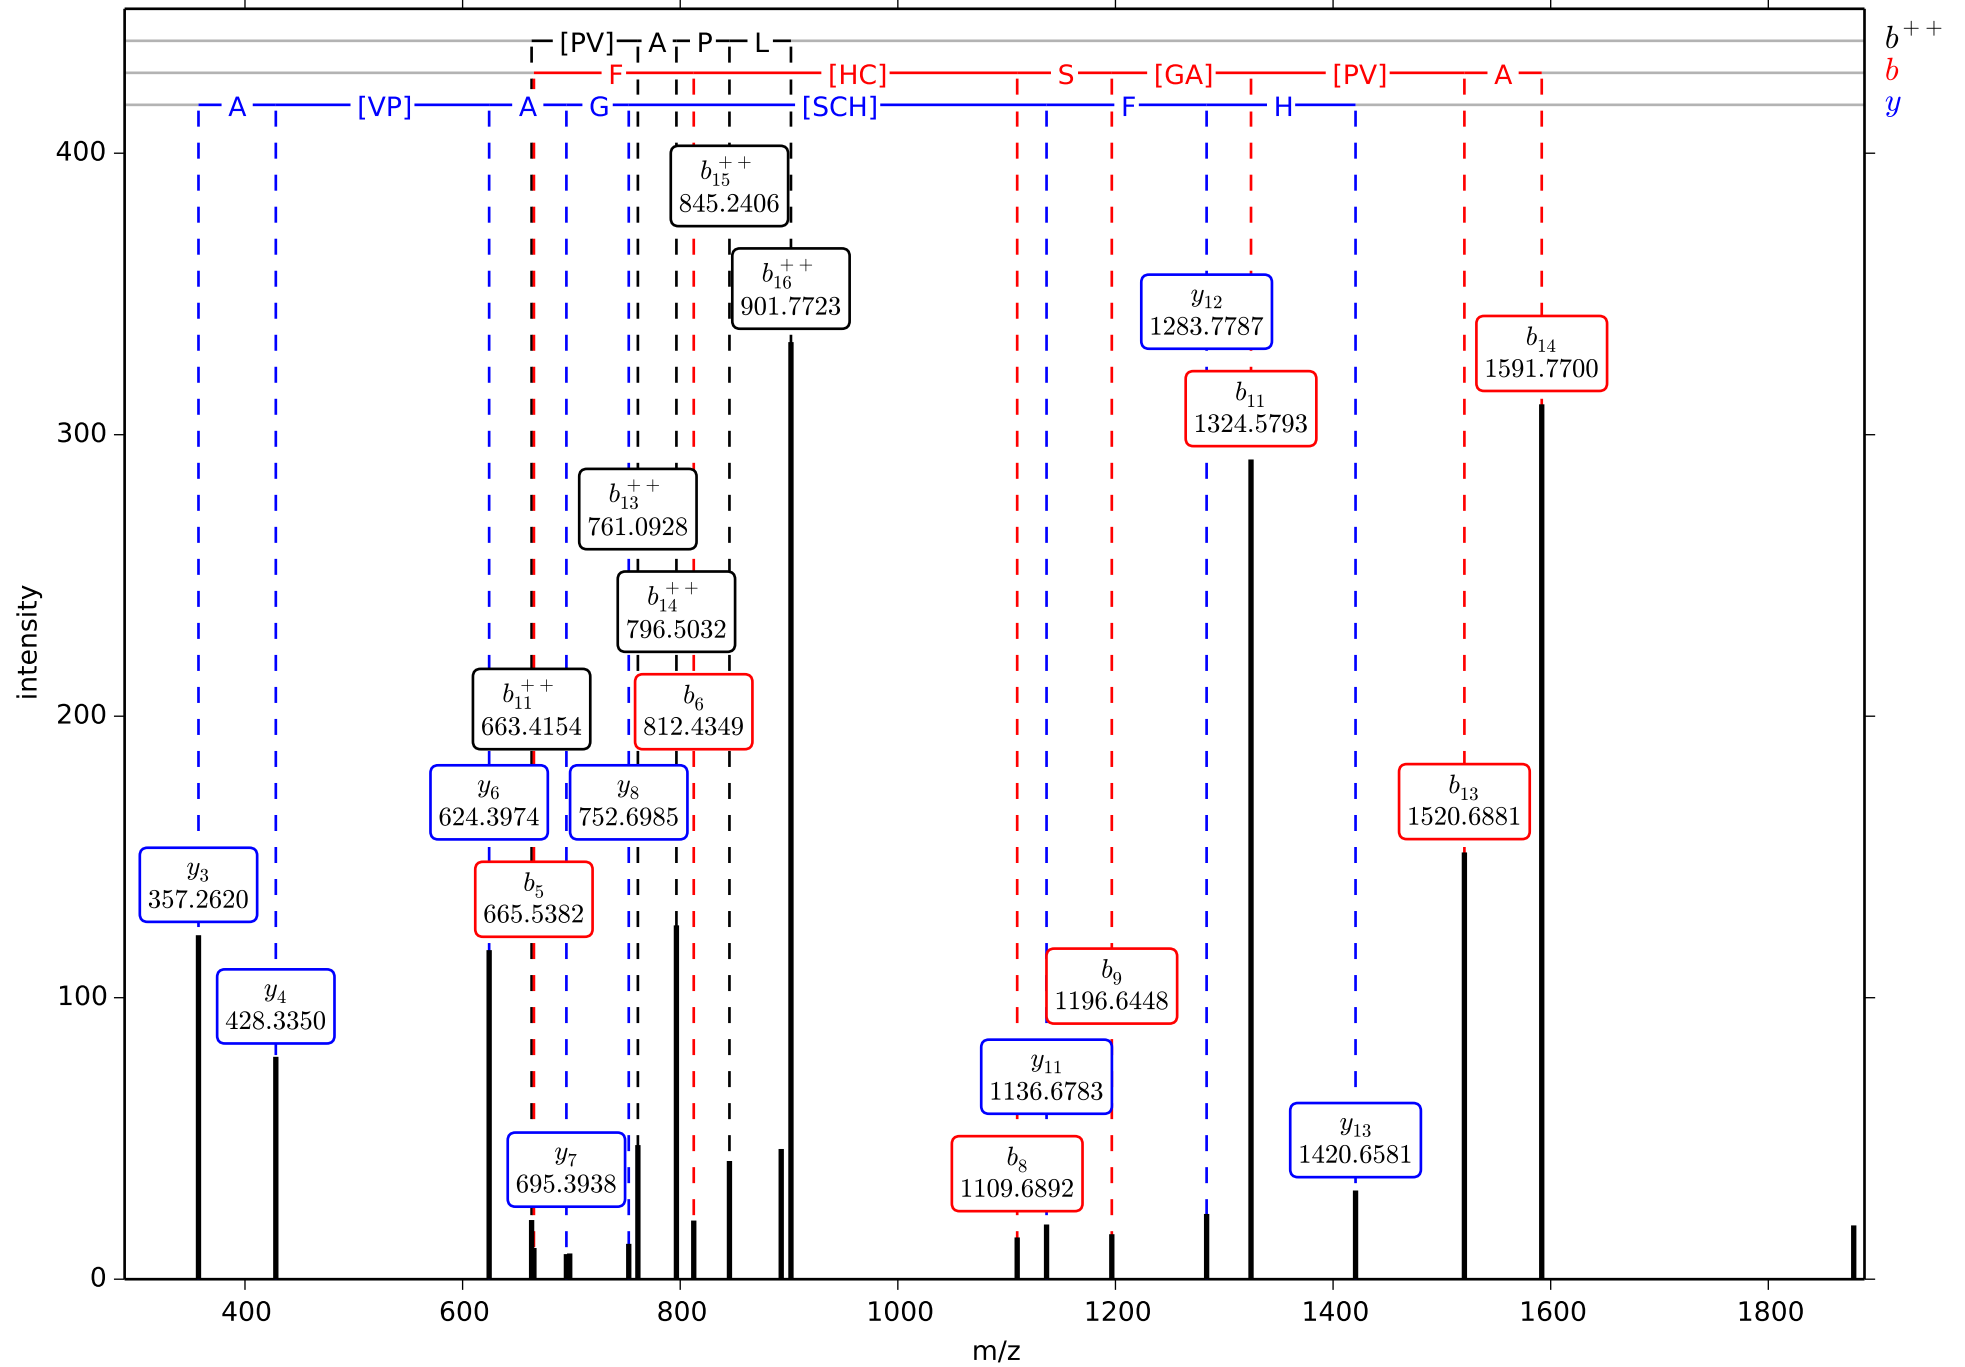

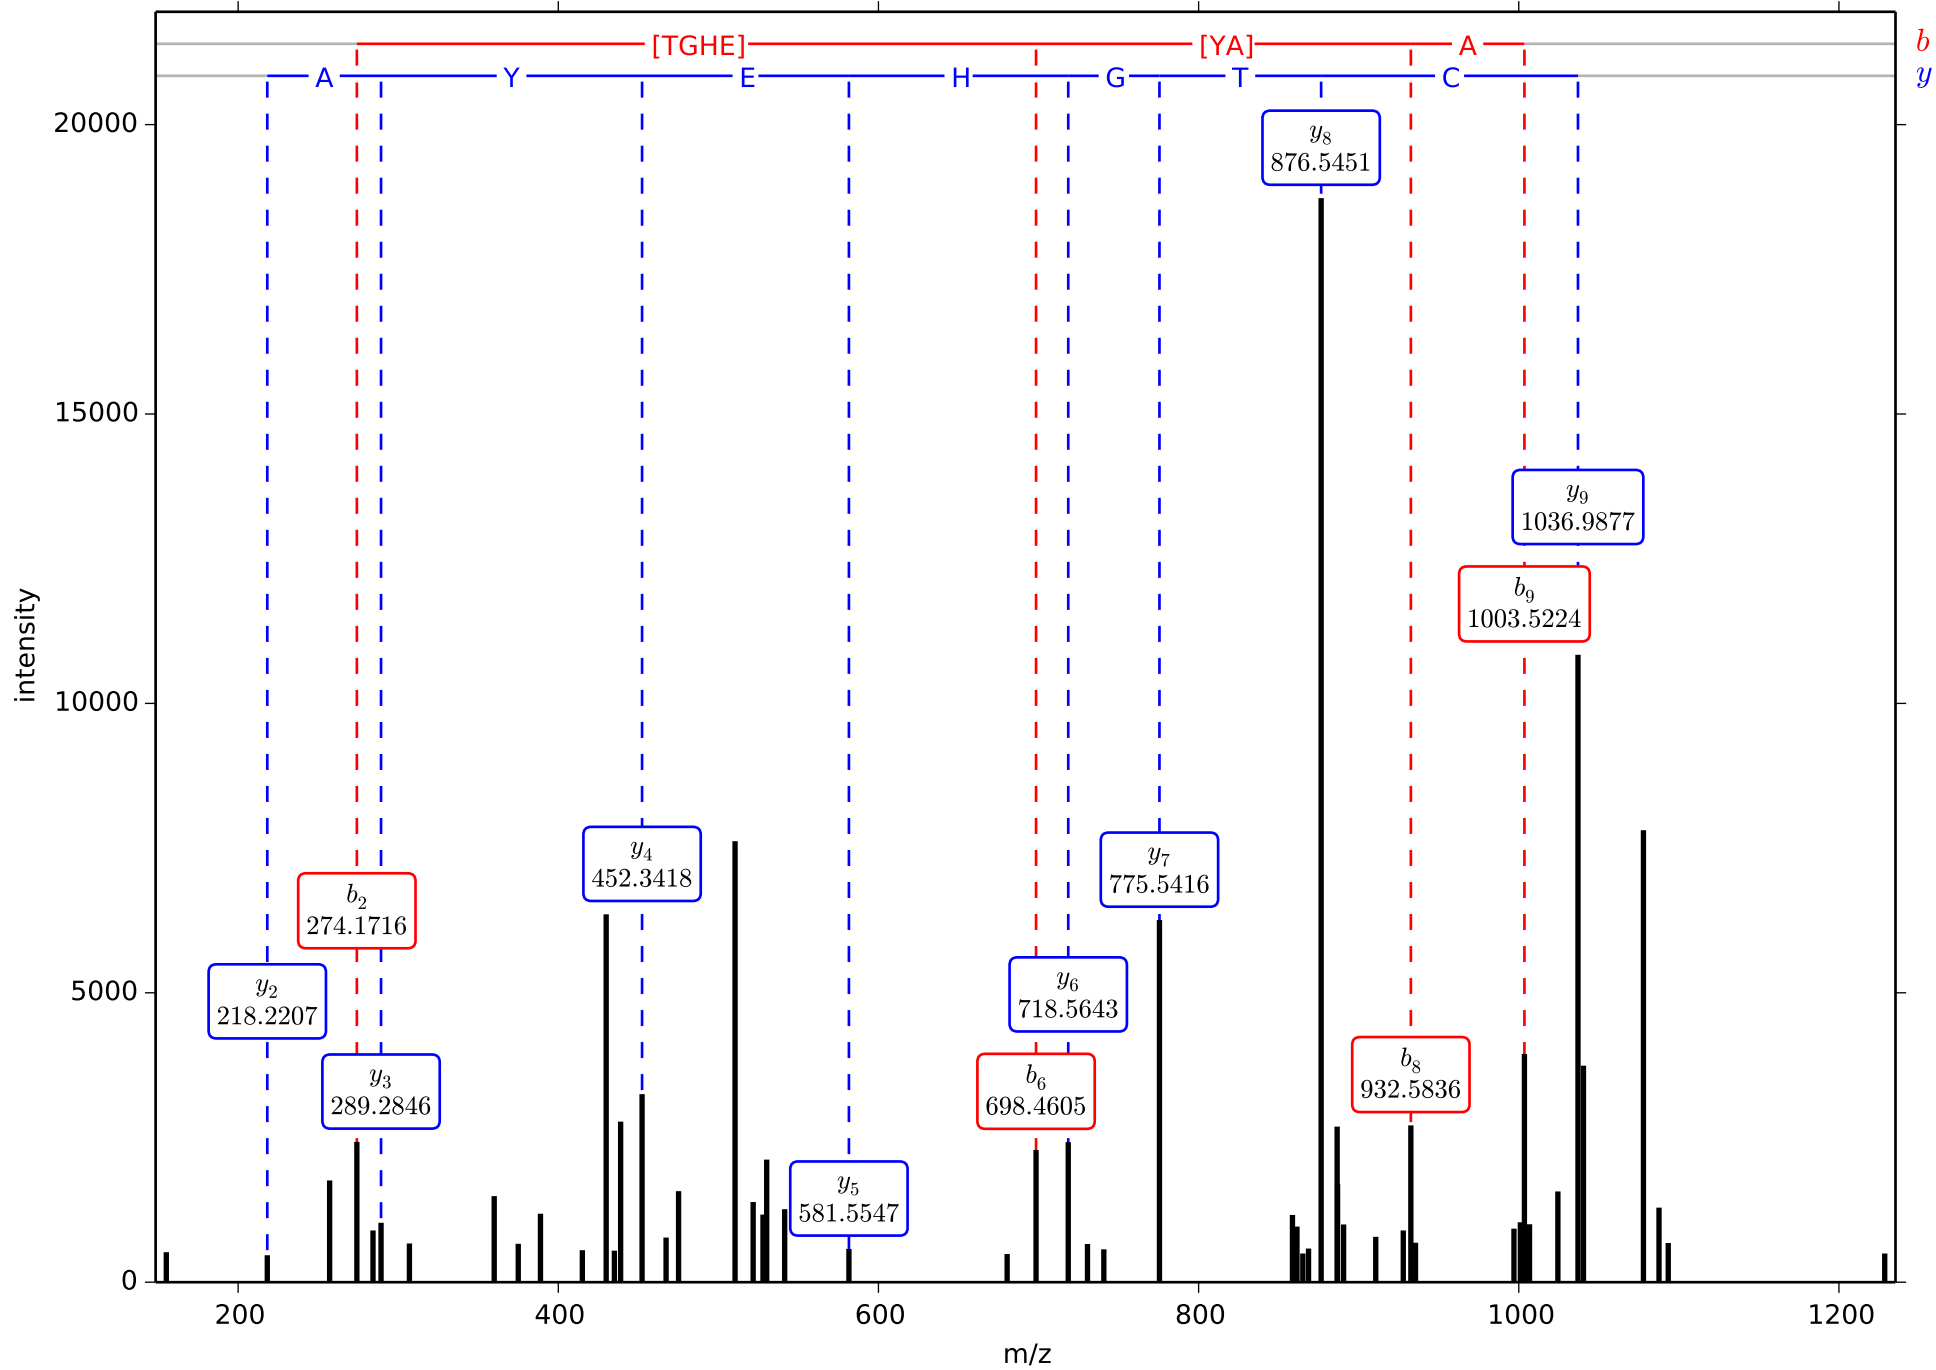

# Q810U3 : DNILIECAK

parent: 602.796760,2+

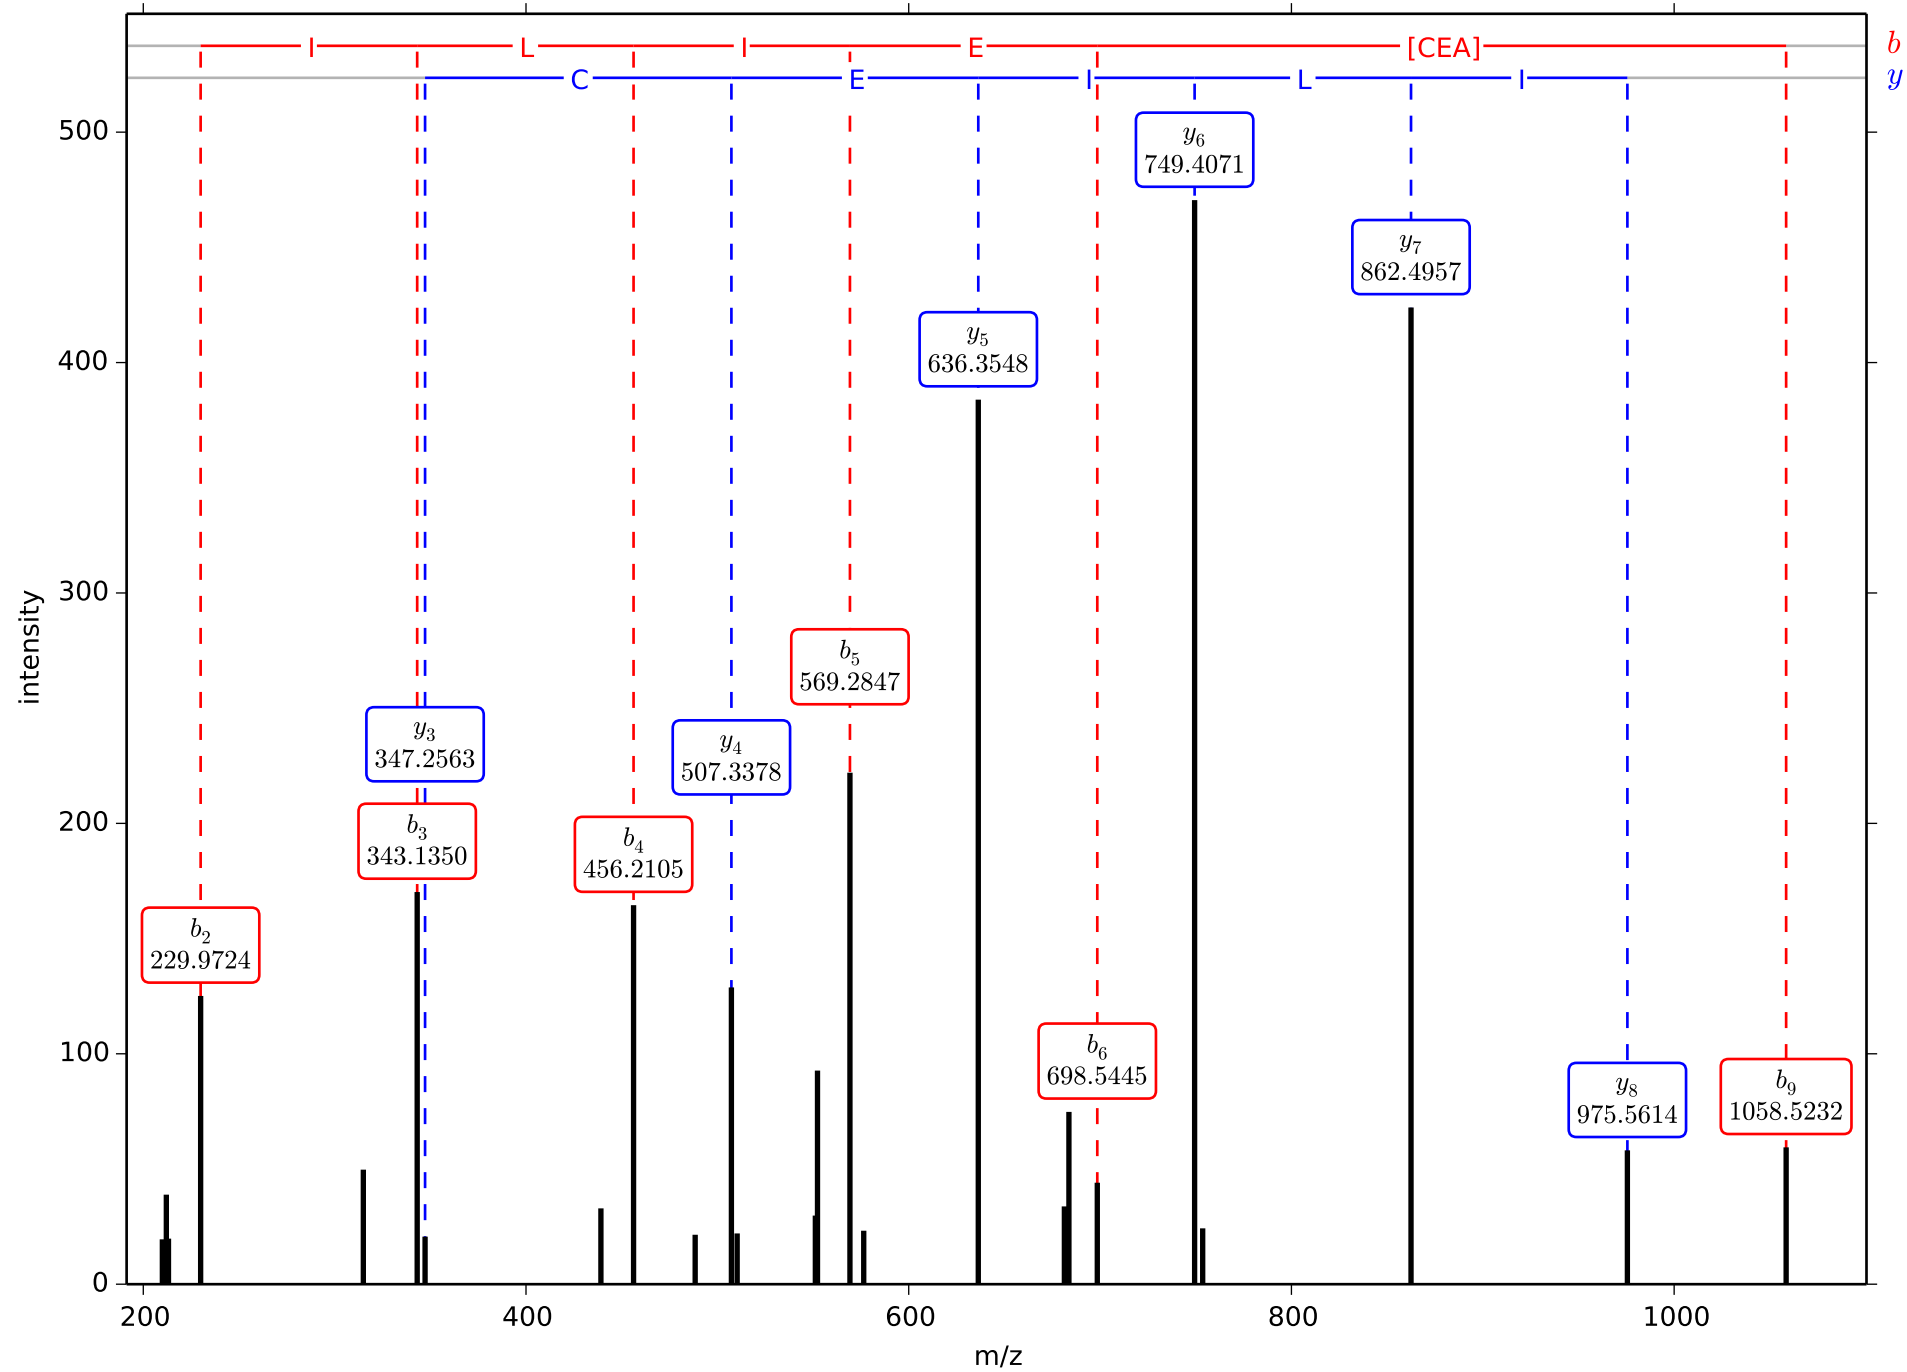

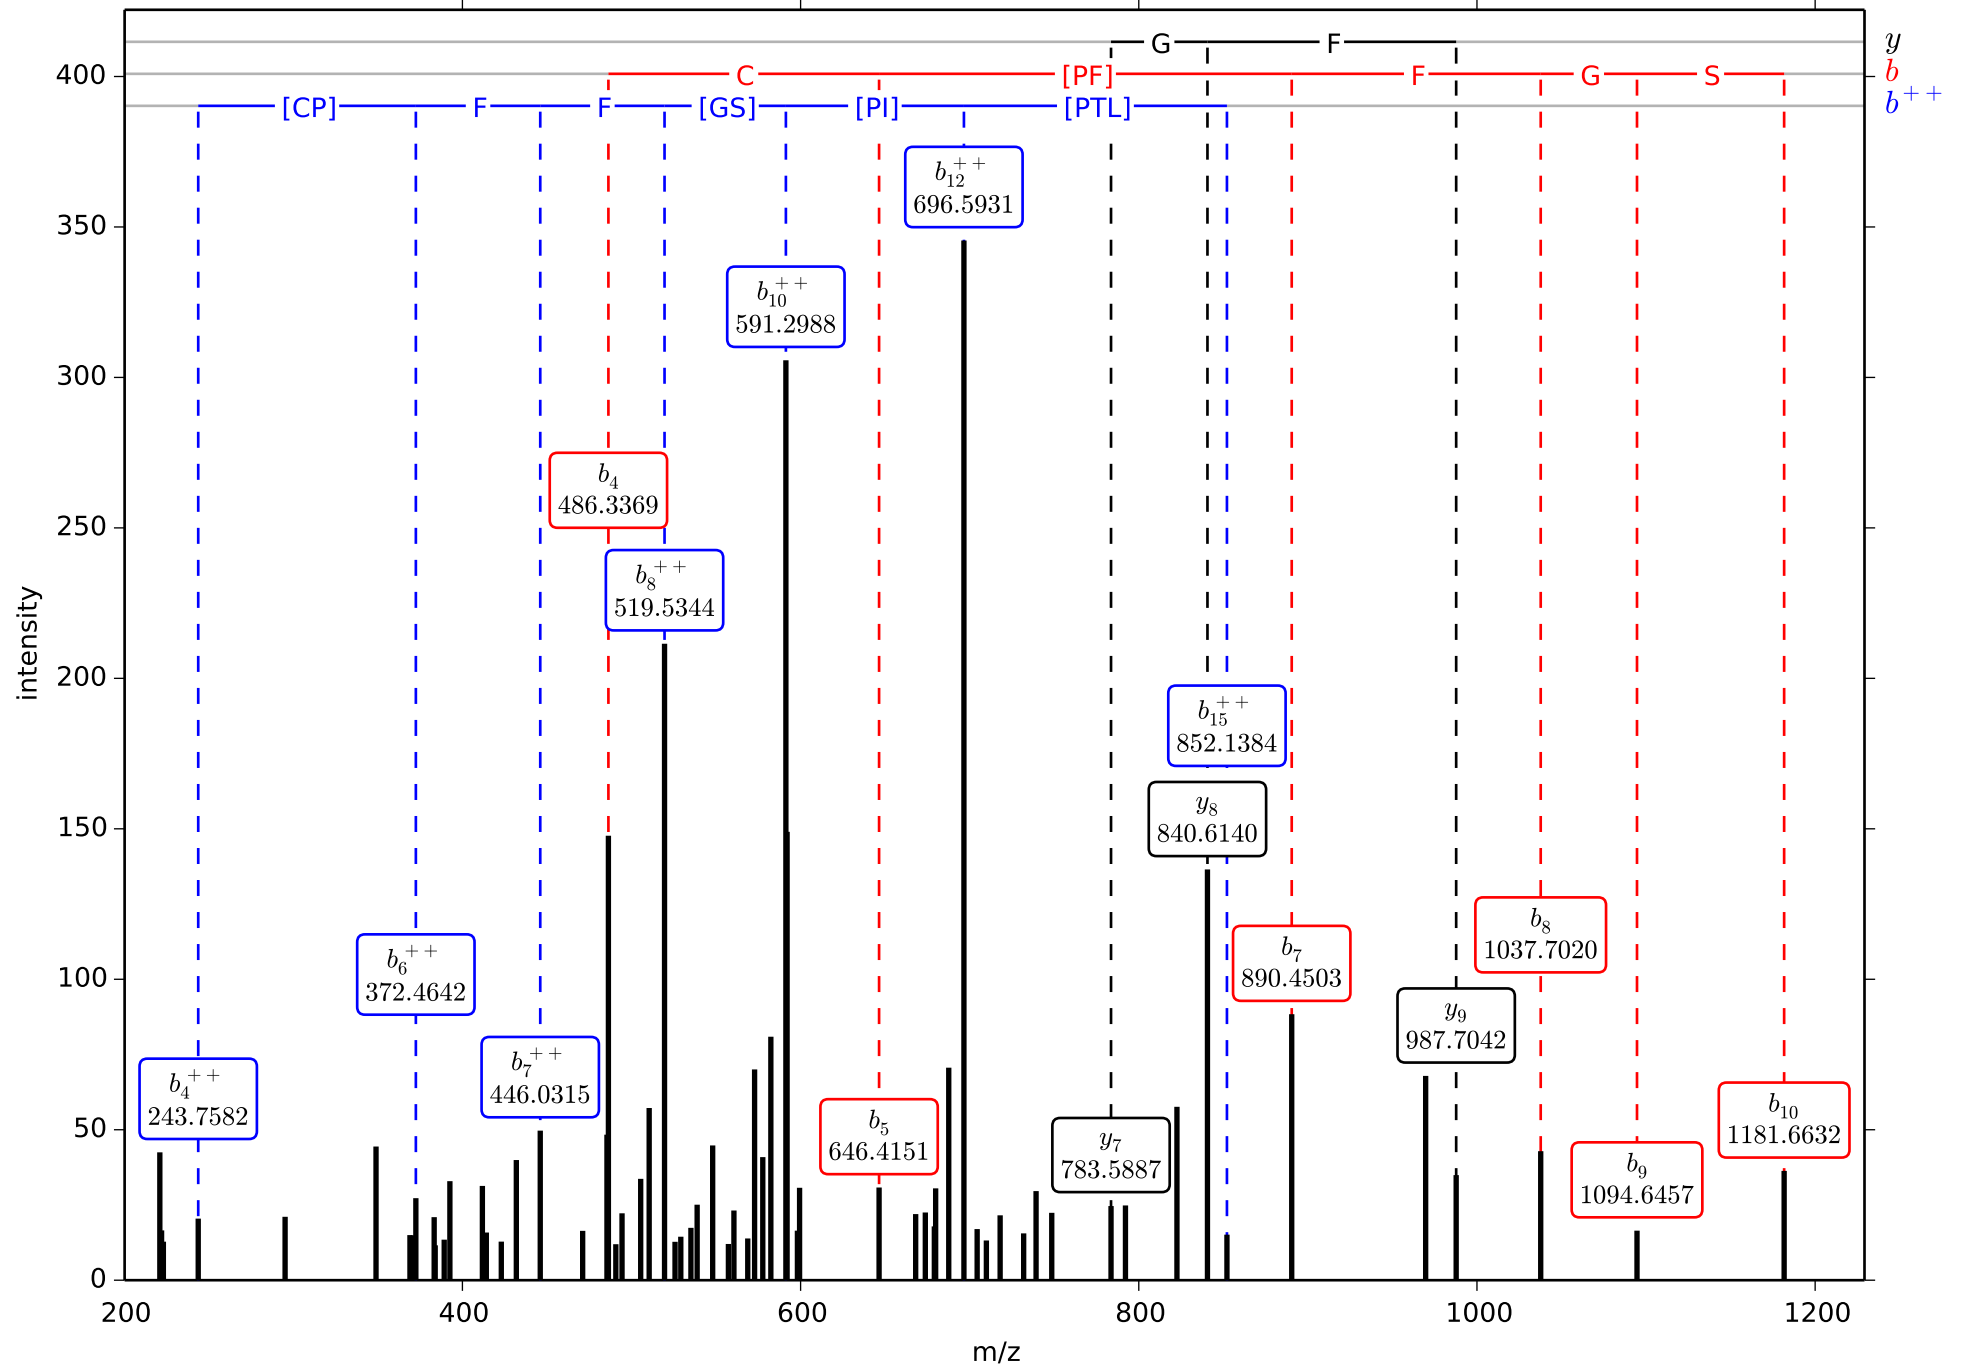



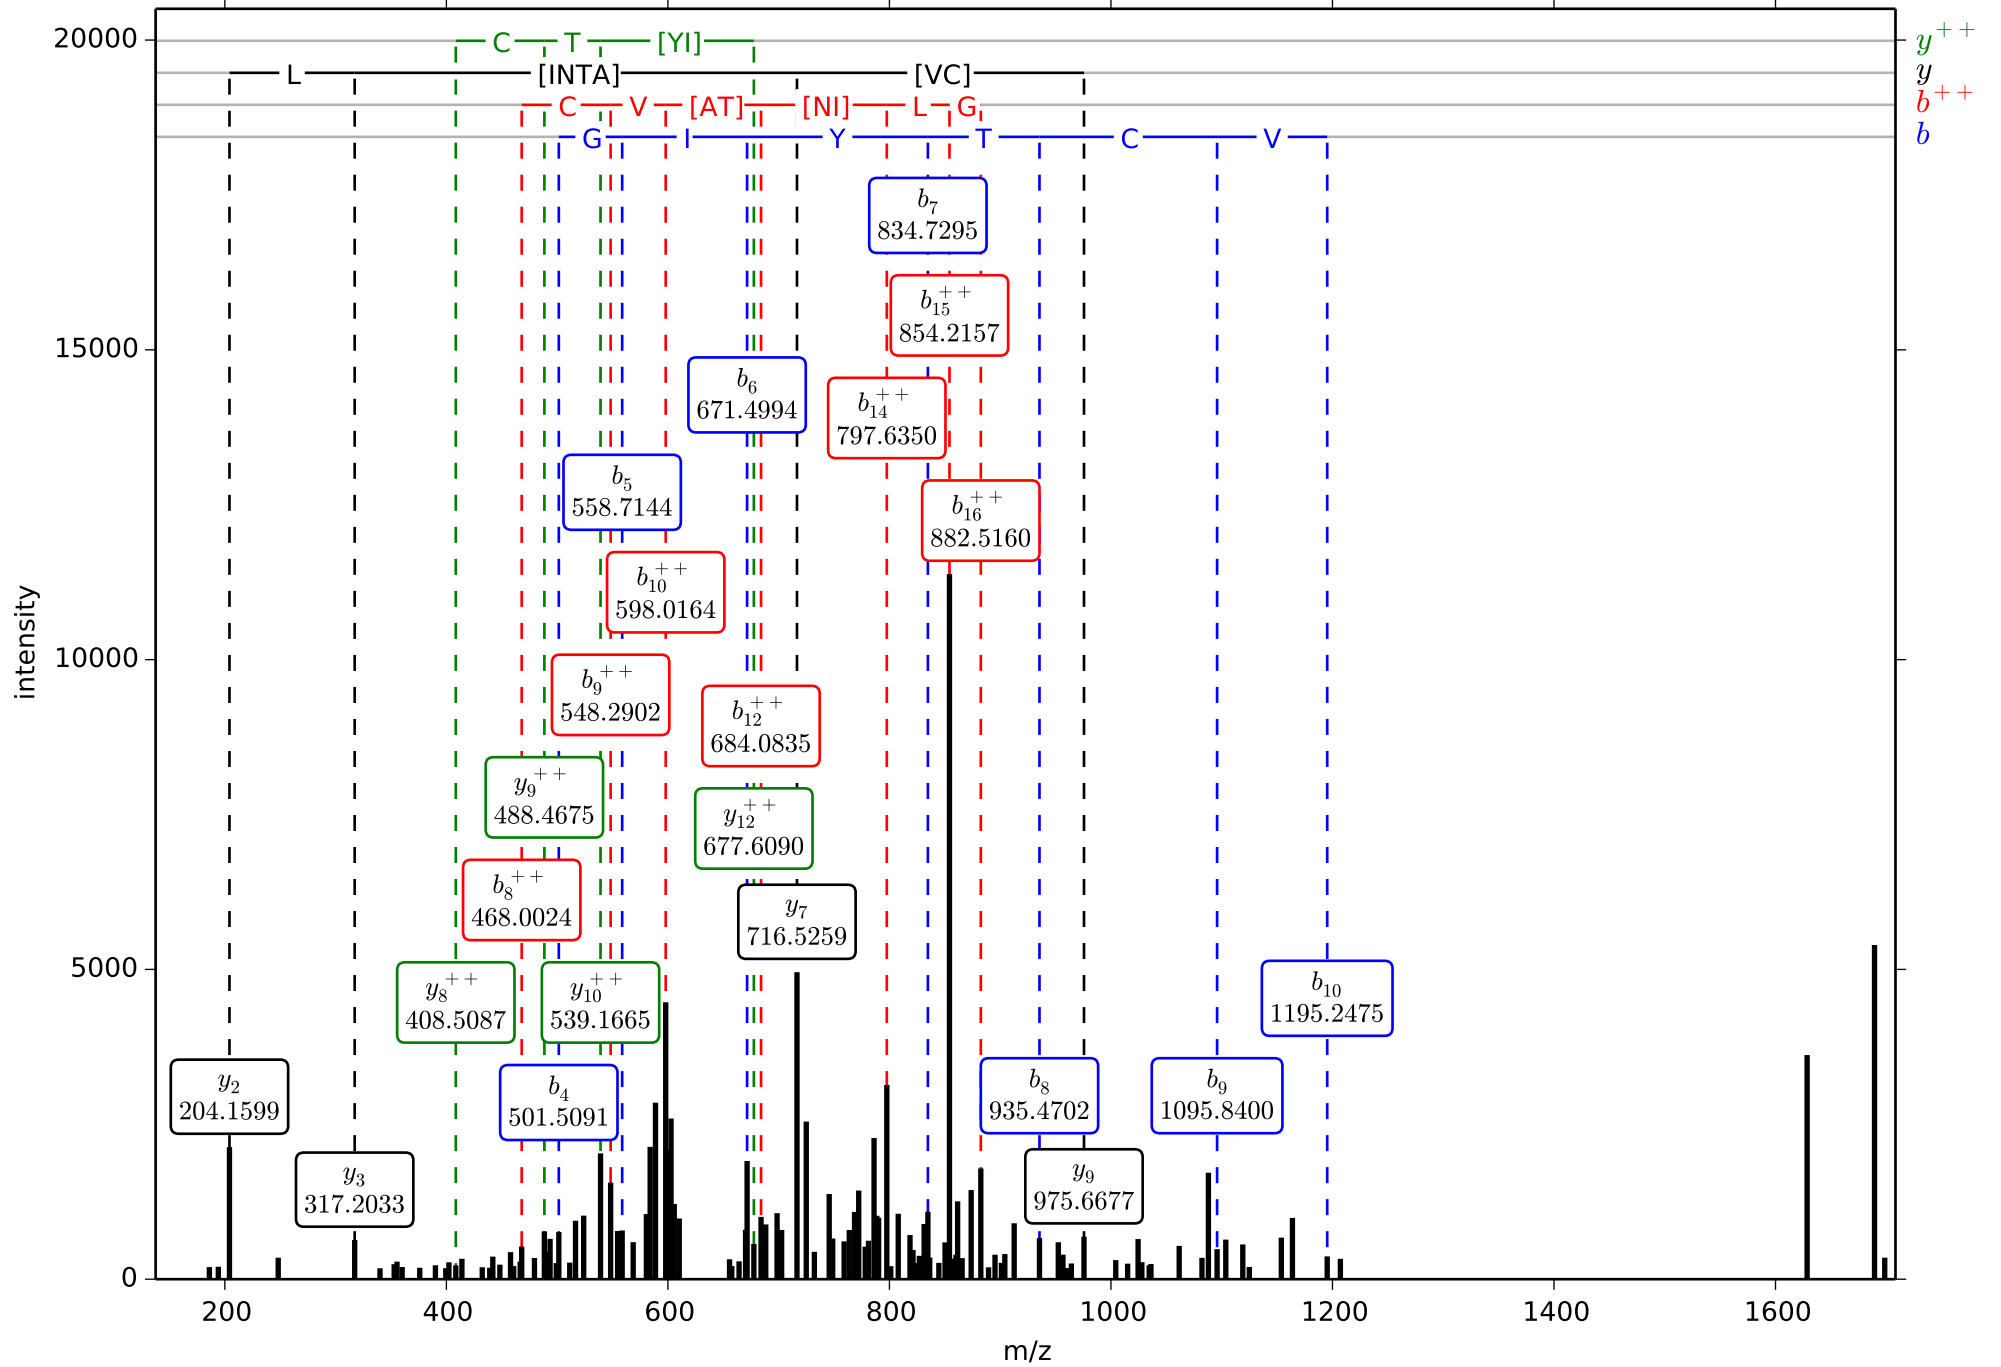

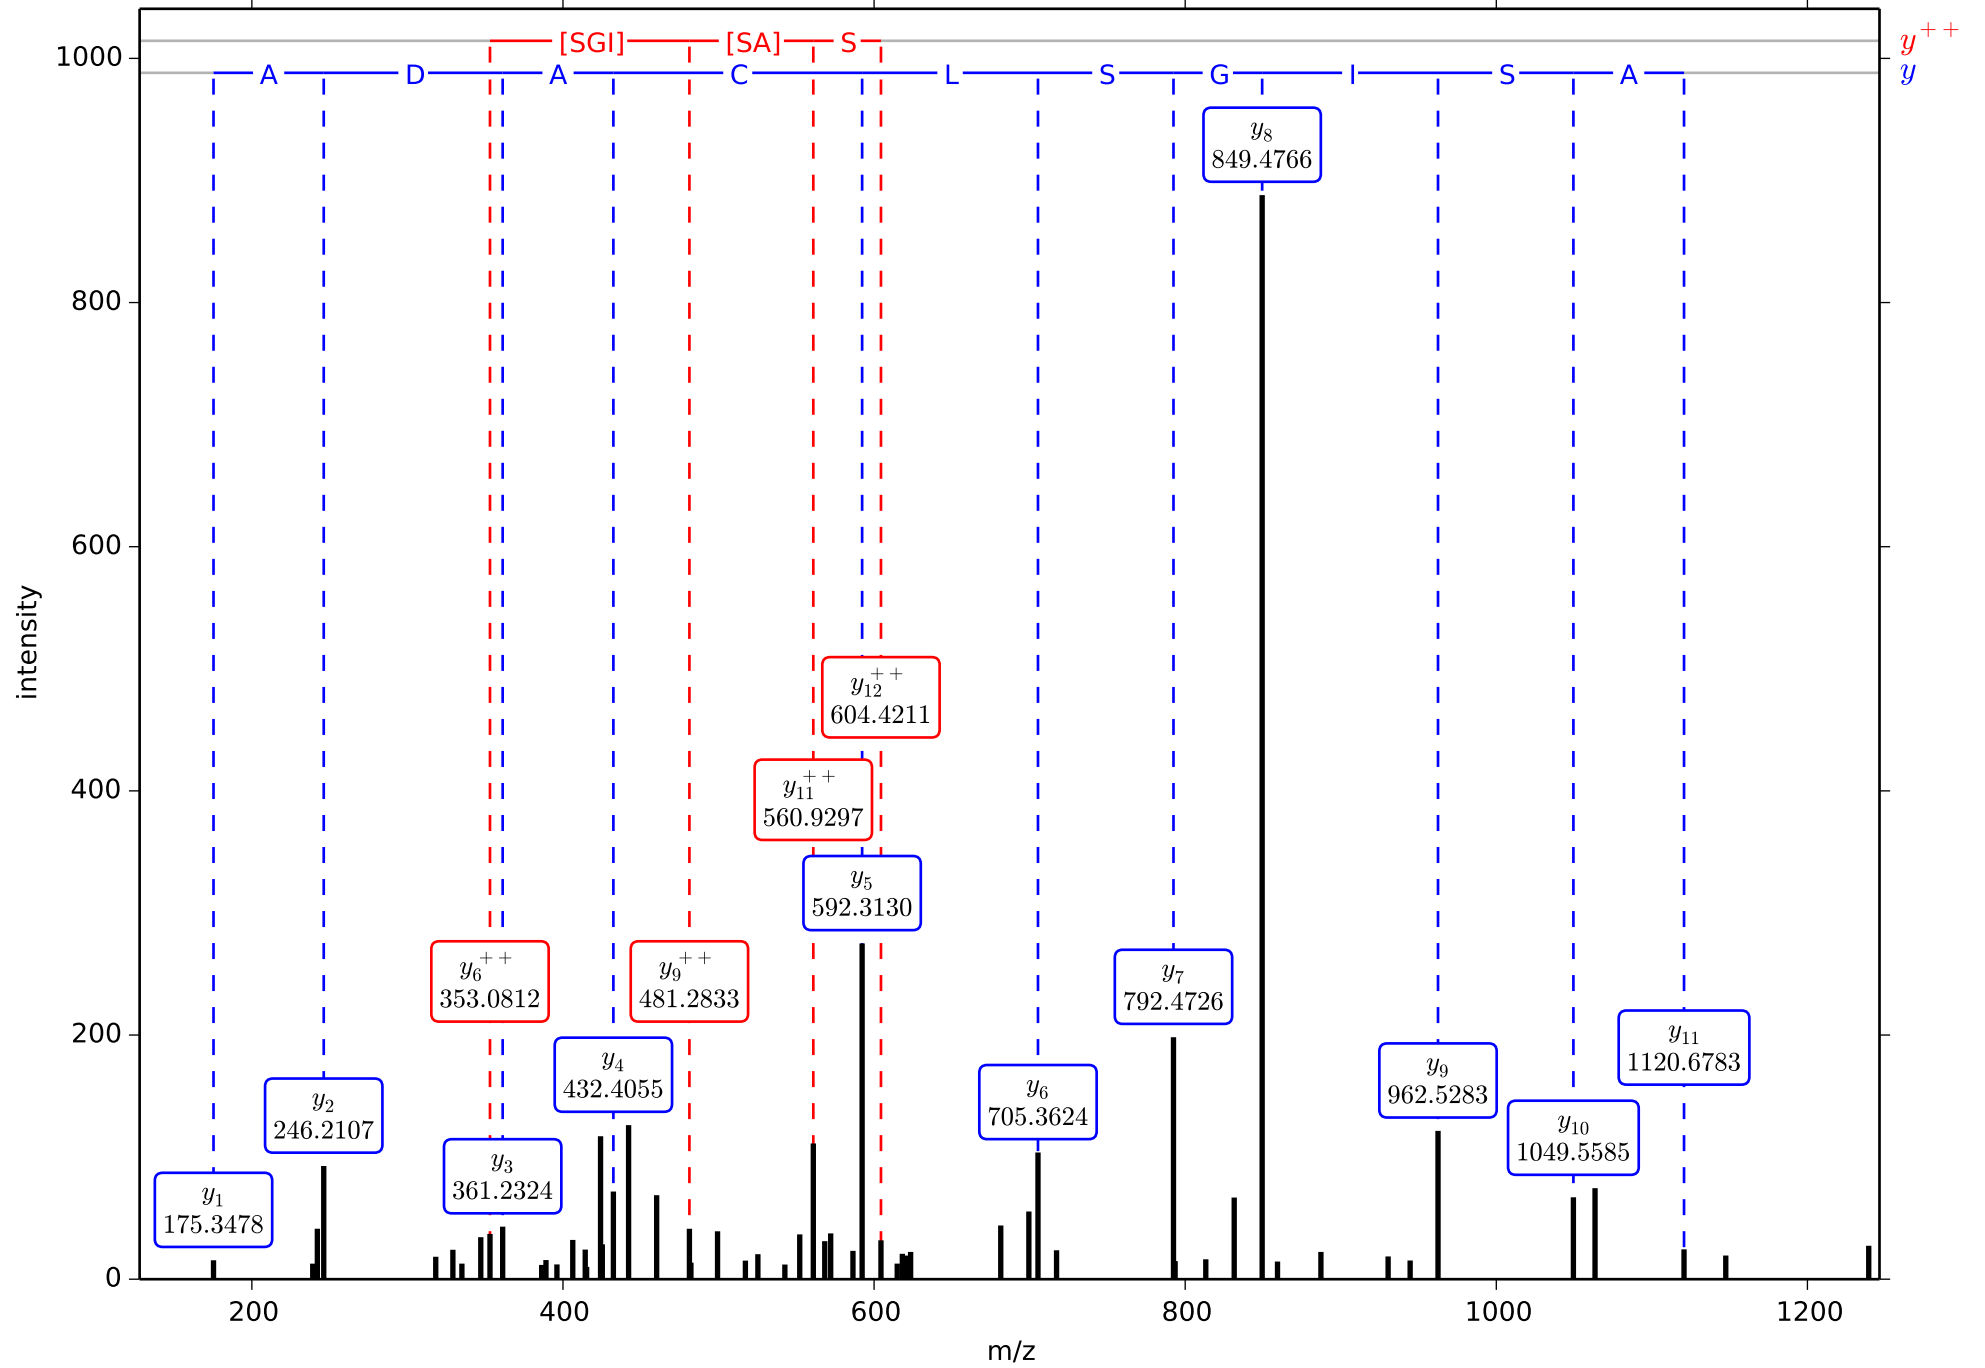

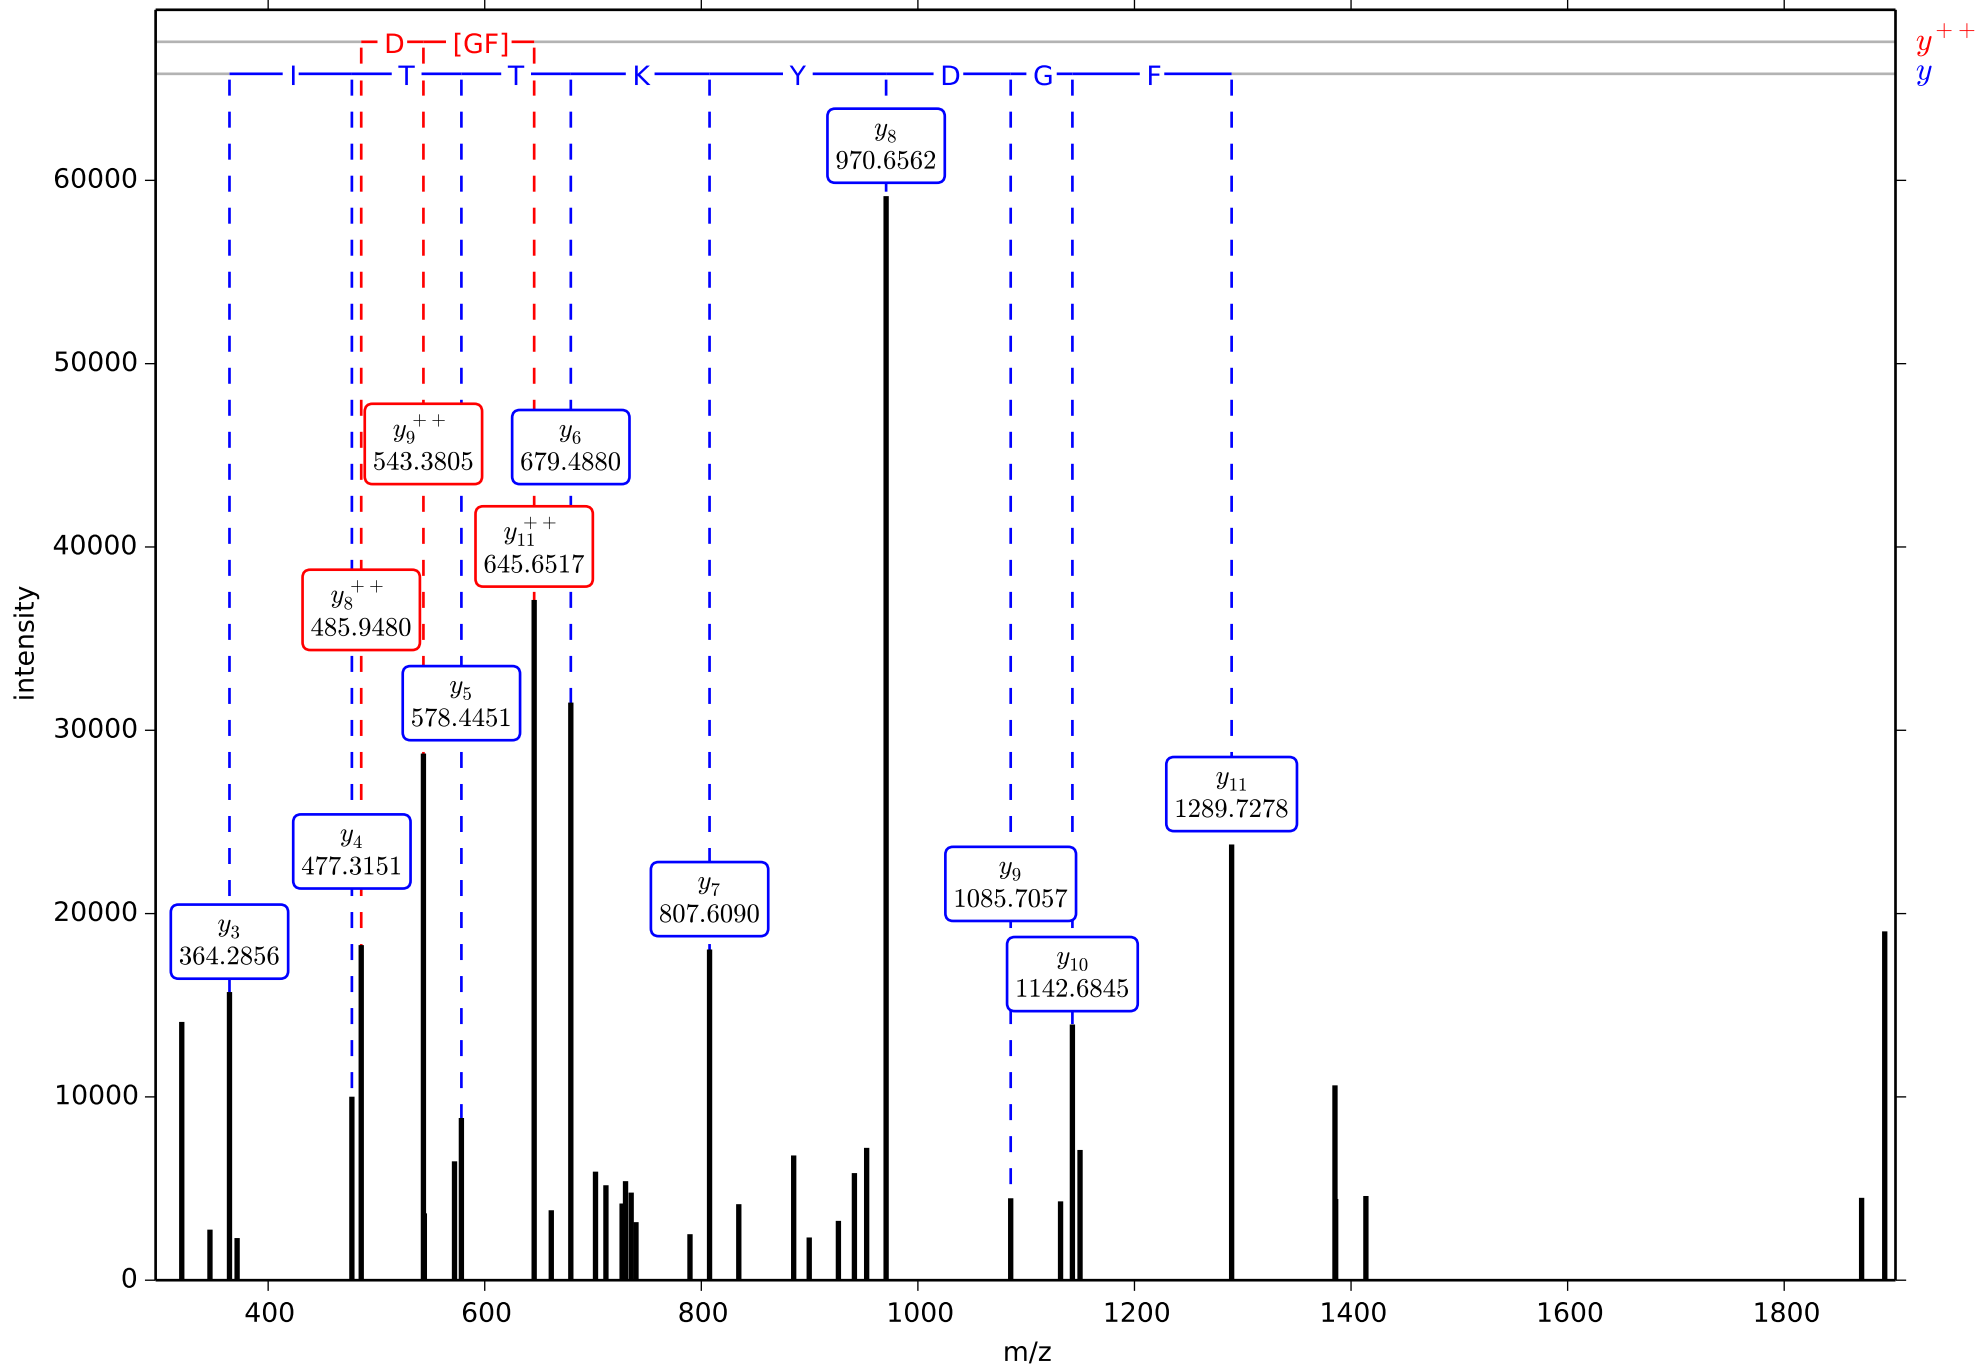

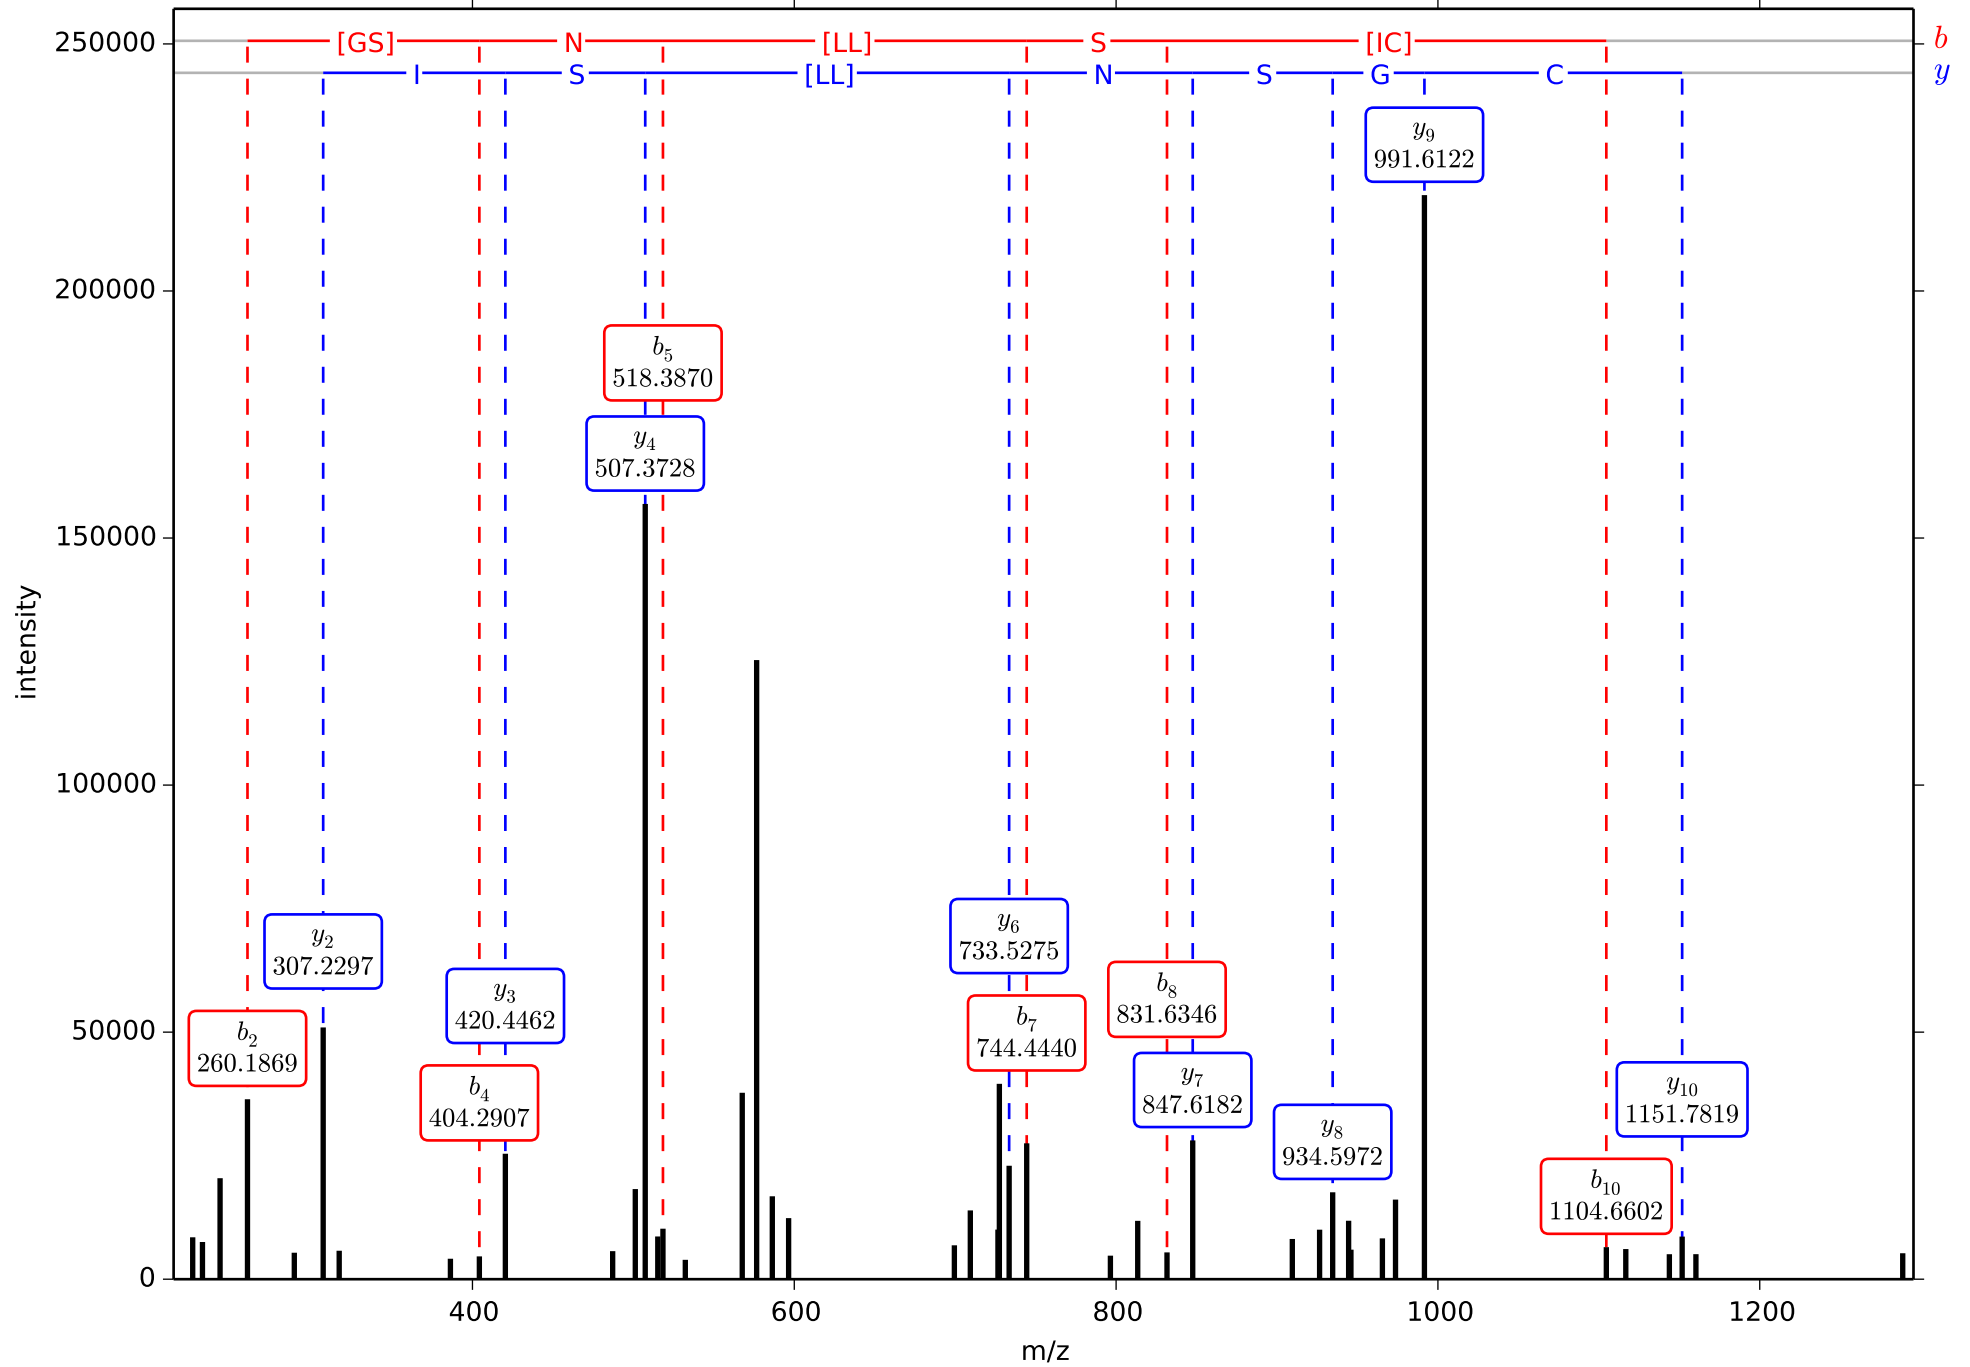

P17426 : ALQVGCLR

parent: 515.299480,2+

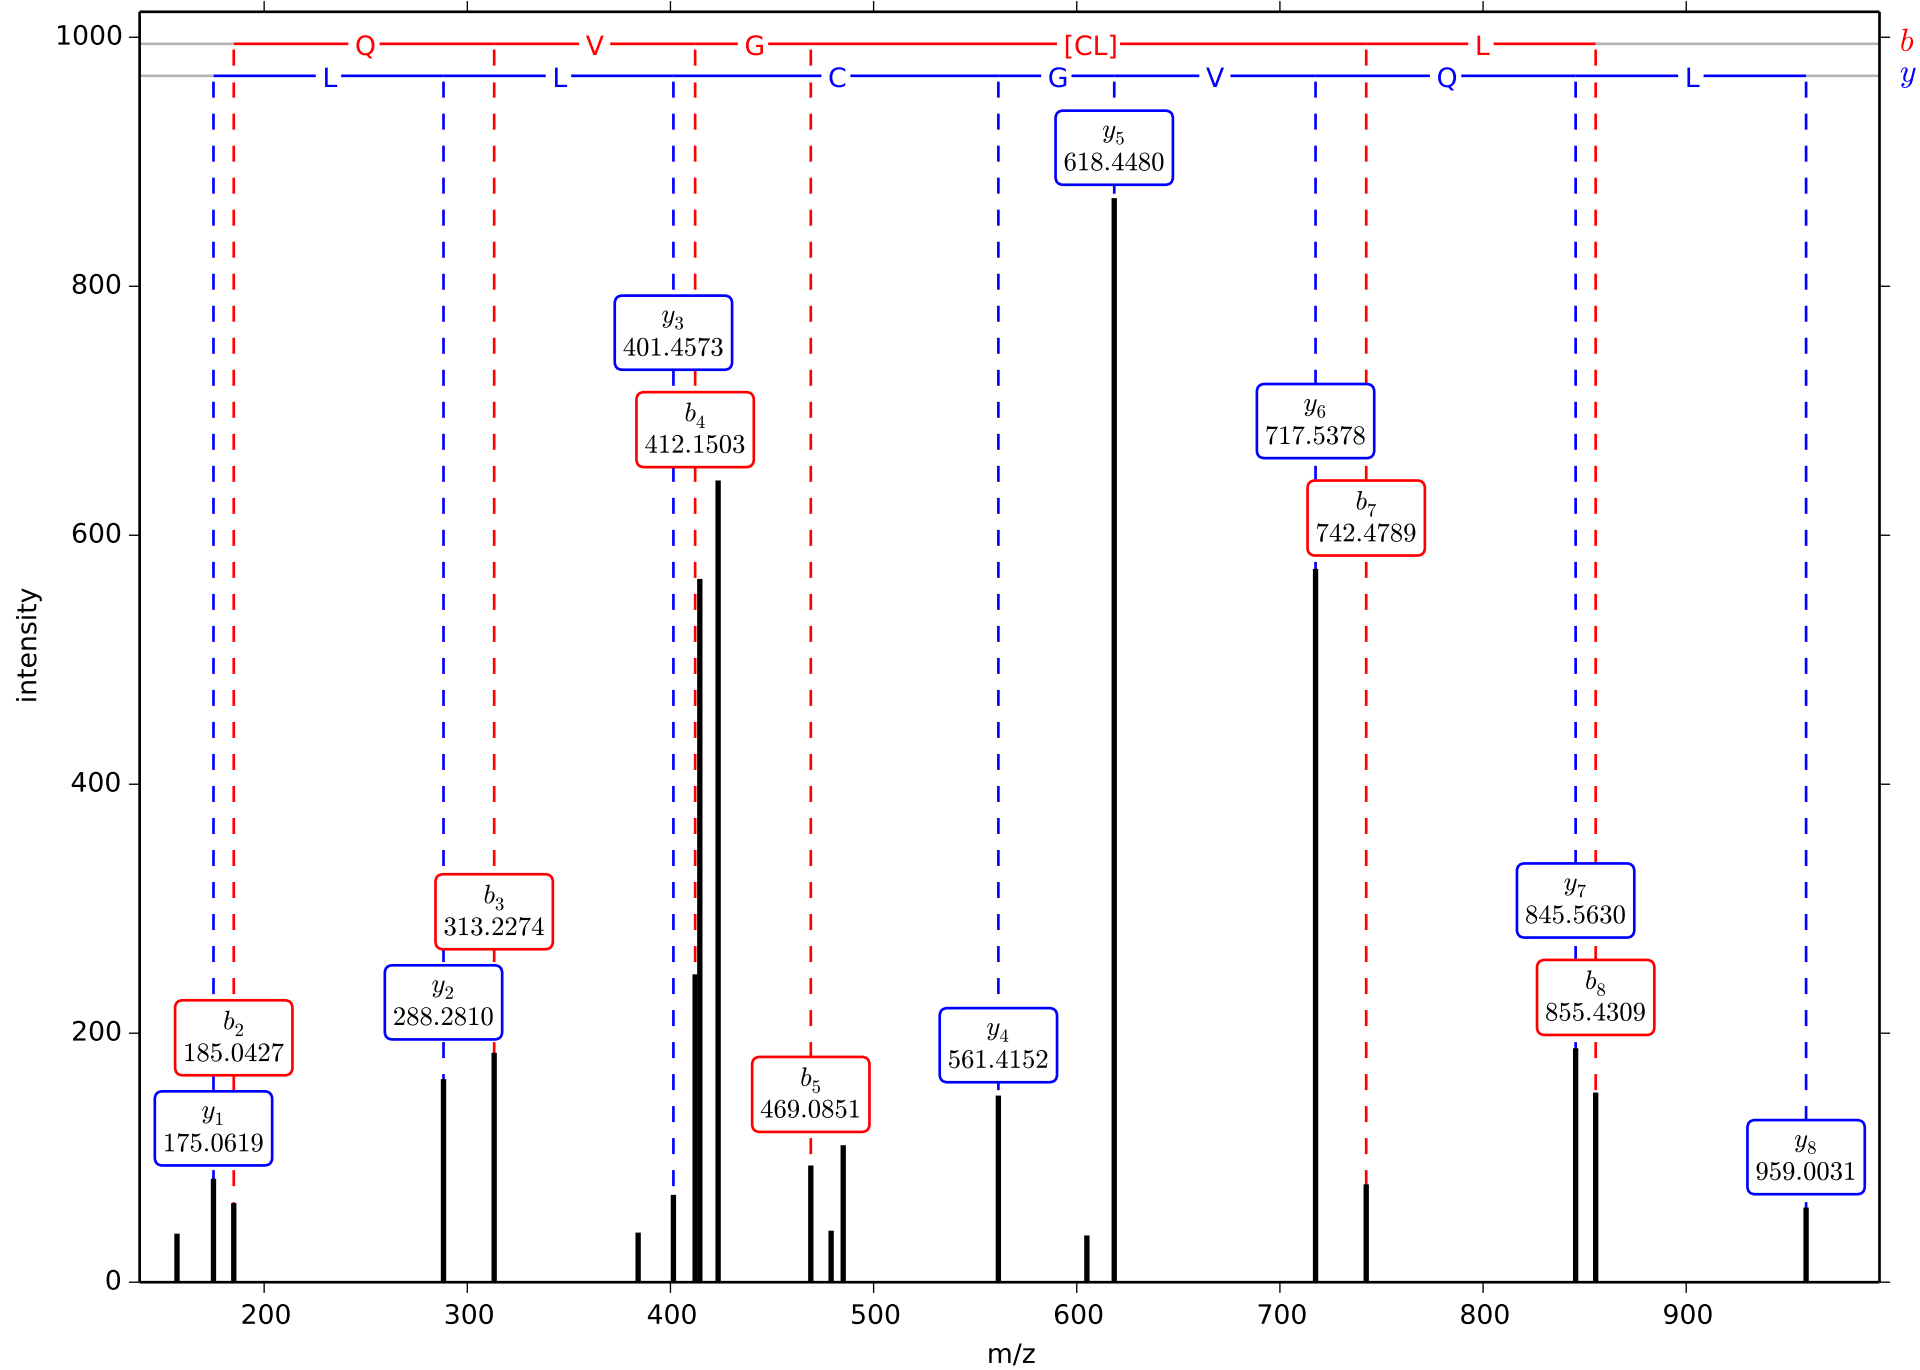

P17426 : HLCELLAQQF

parent: 629.825090,2+

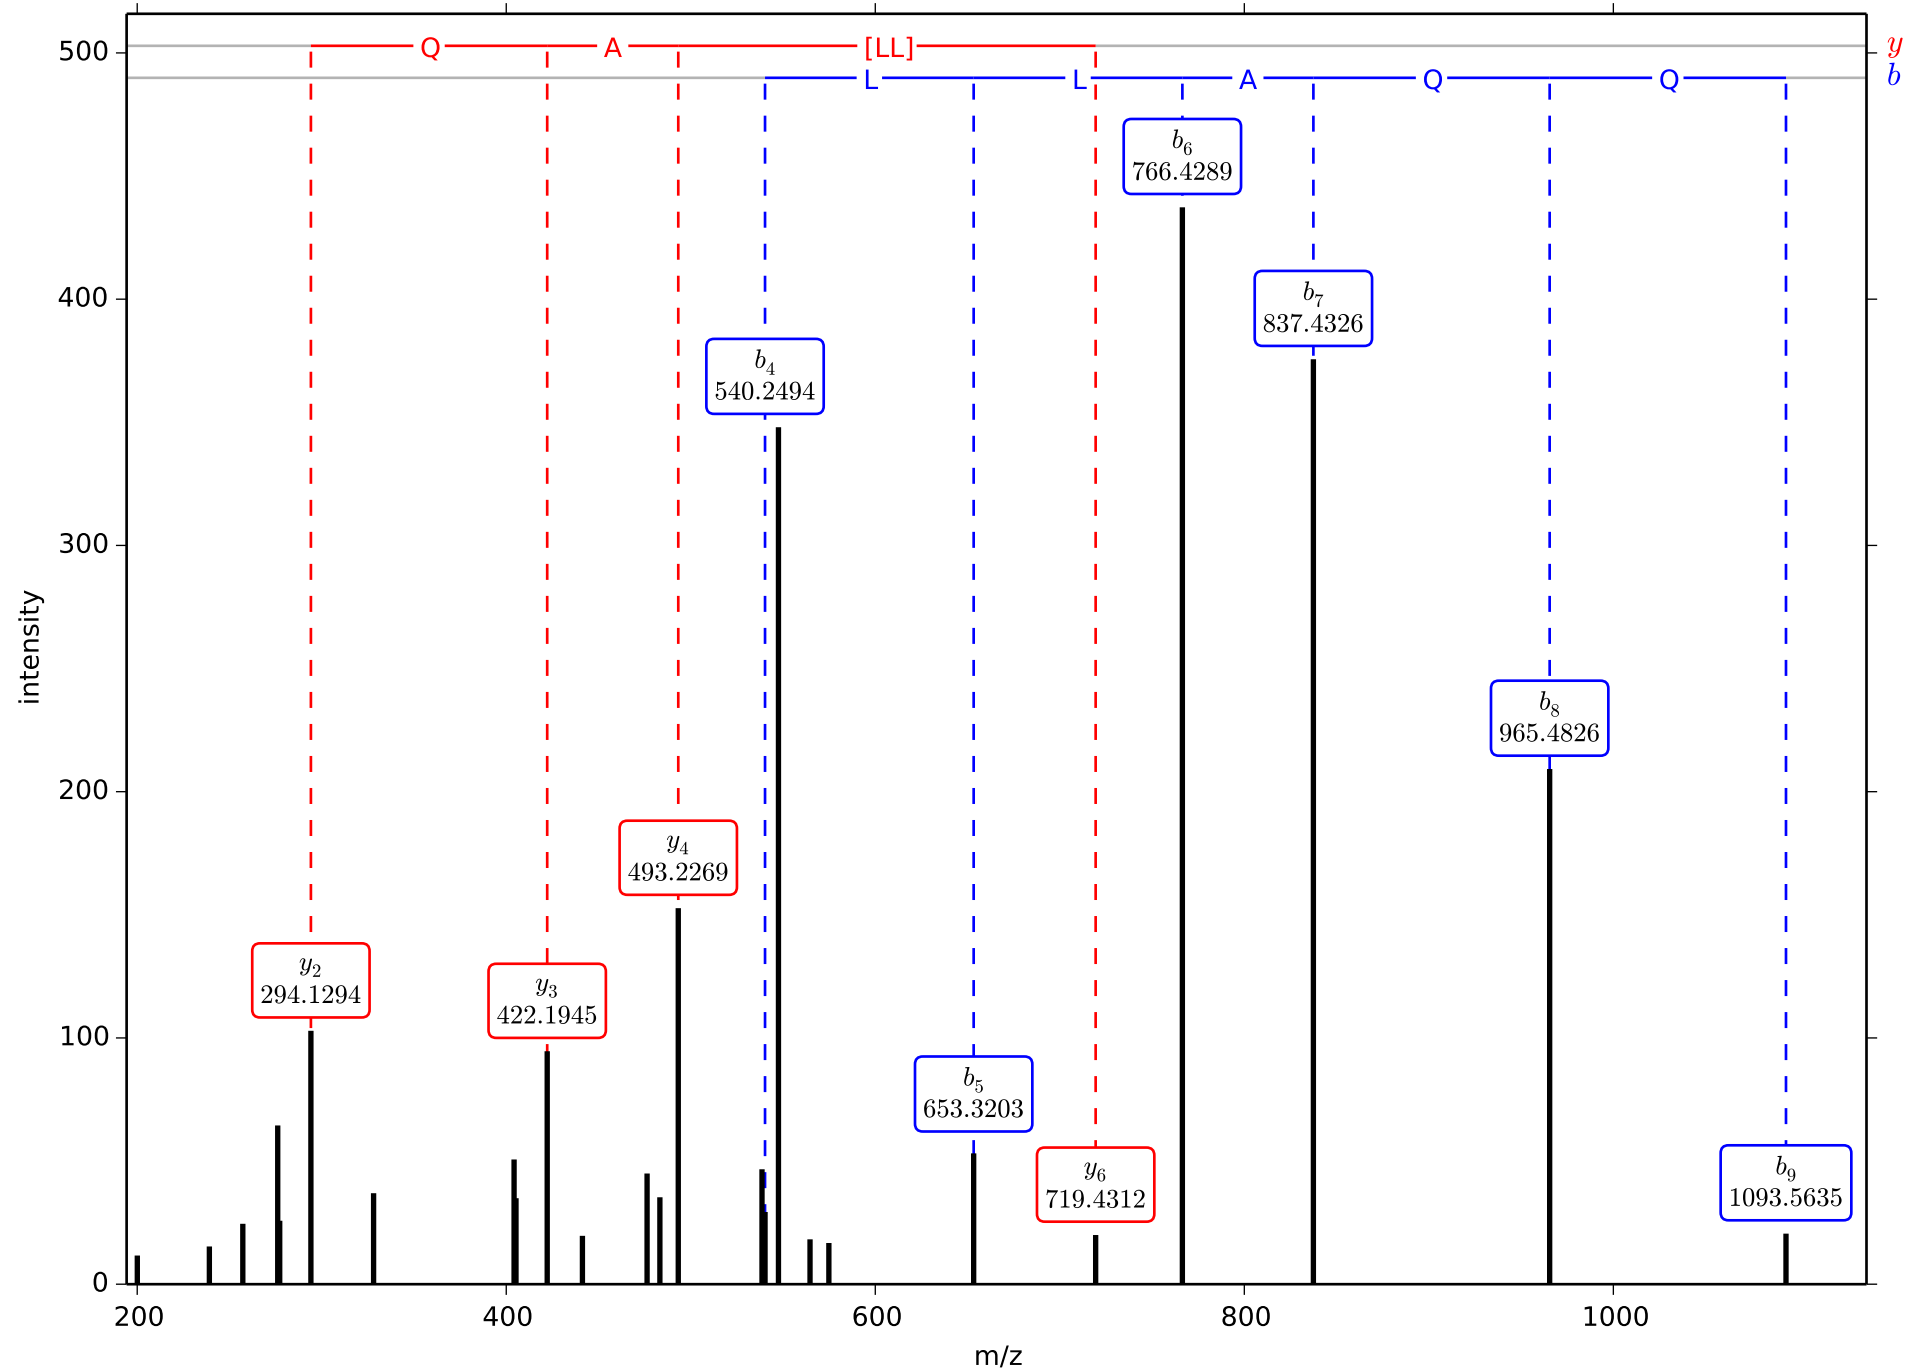

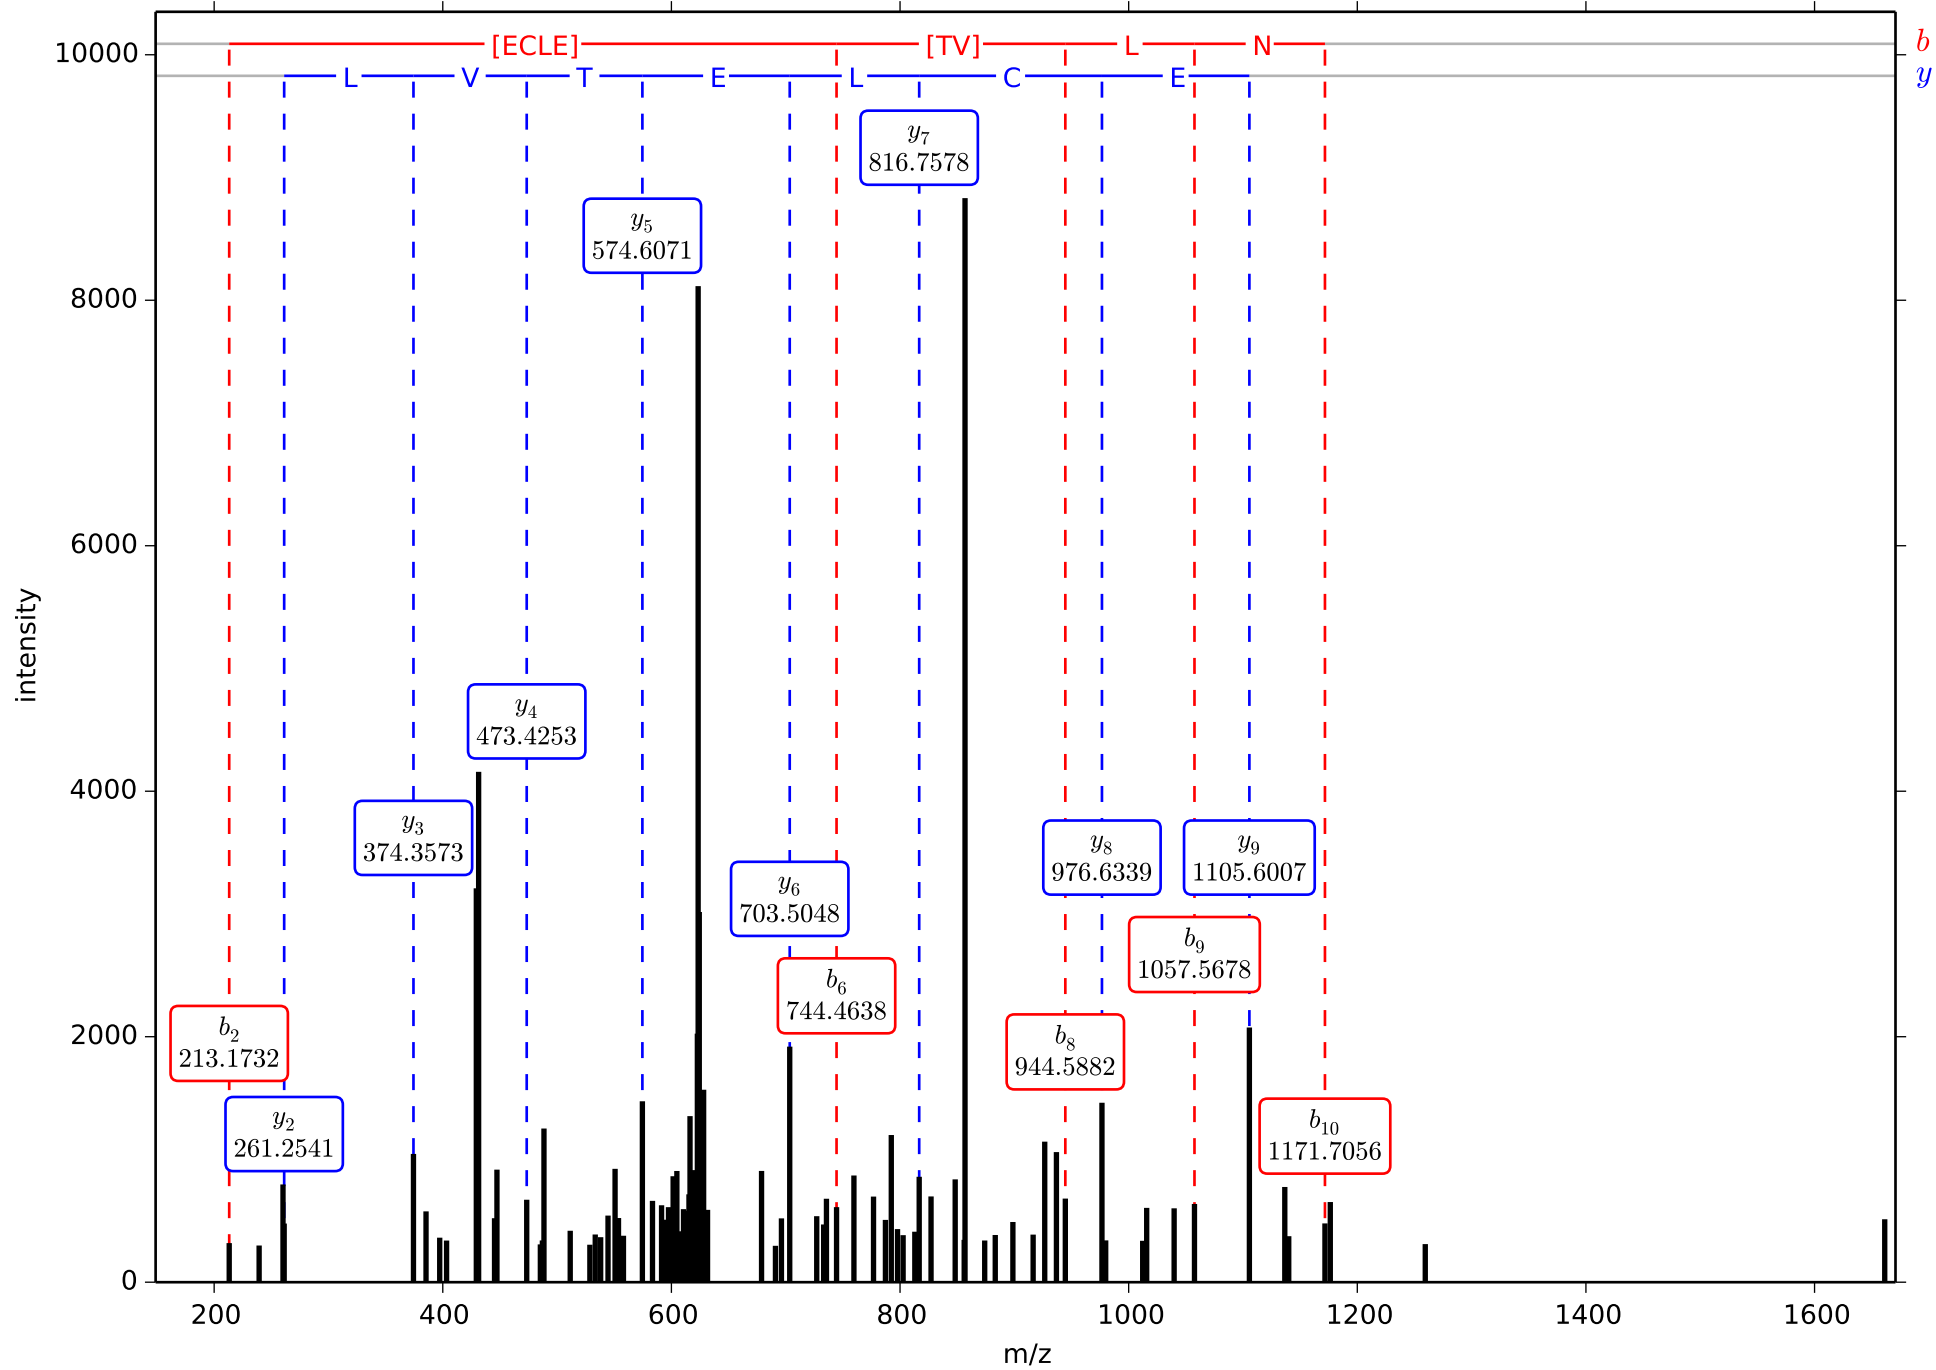

Q60930 : SC SG VEF ST SG SS NT DT GK

parent: 954.436860,2+

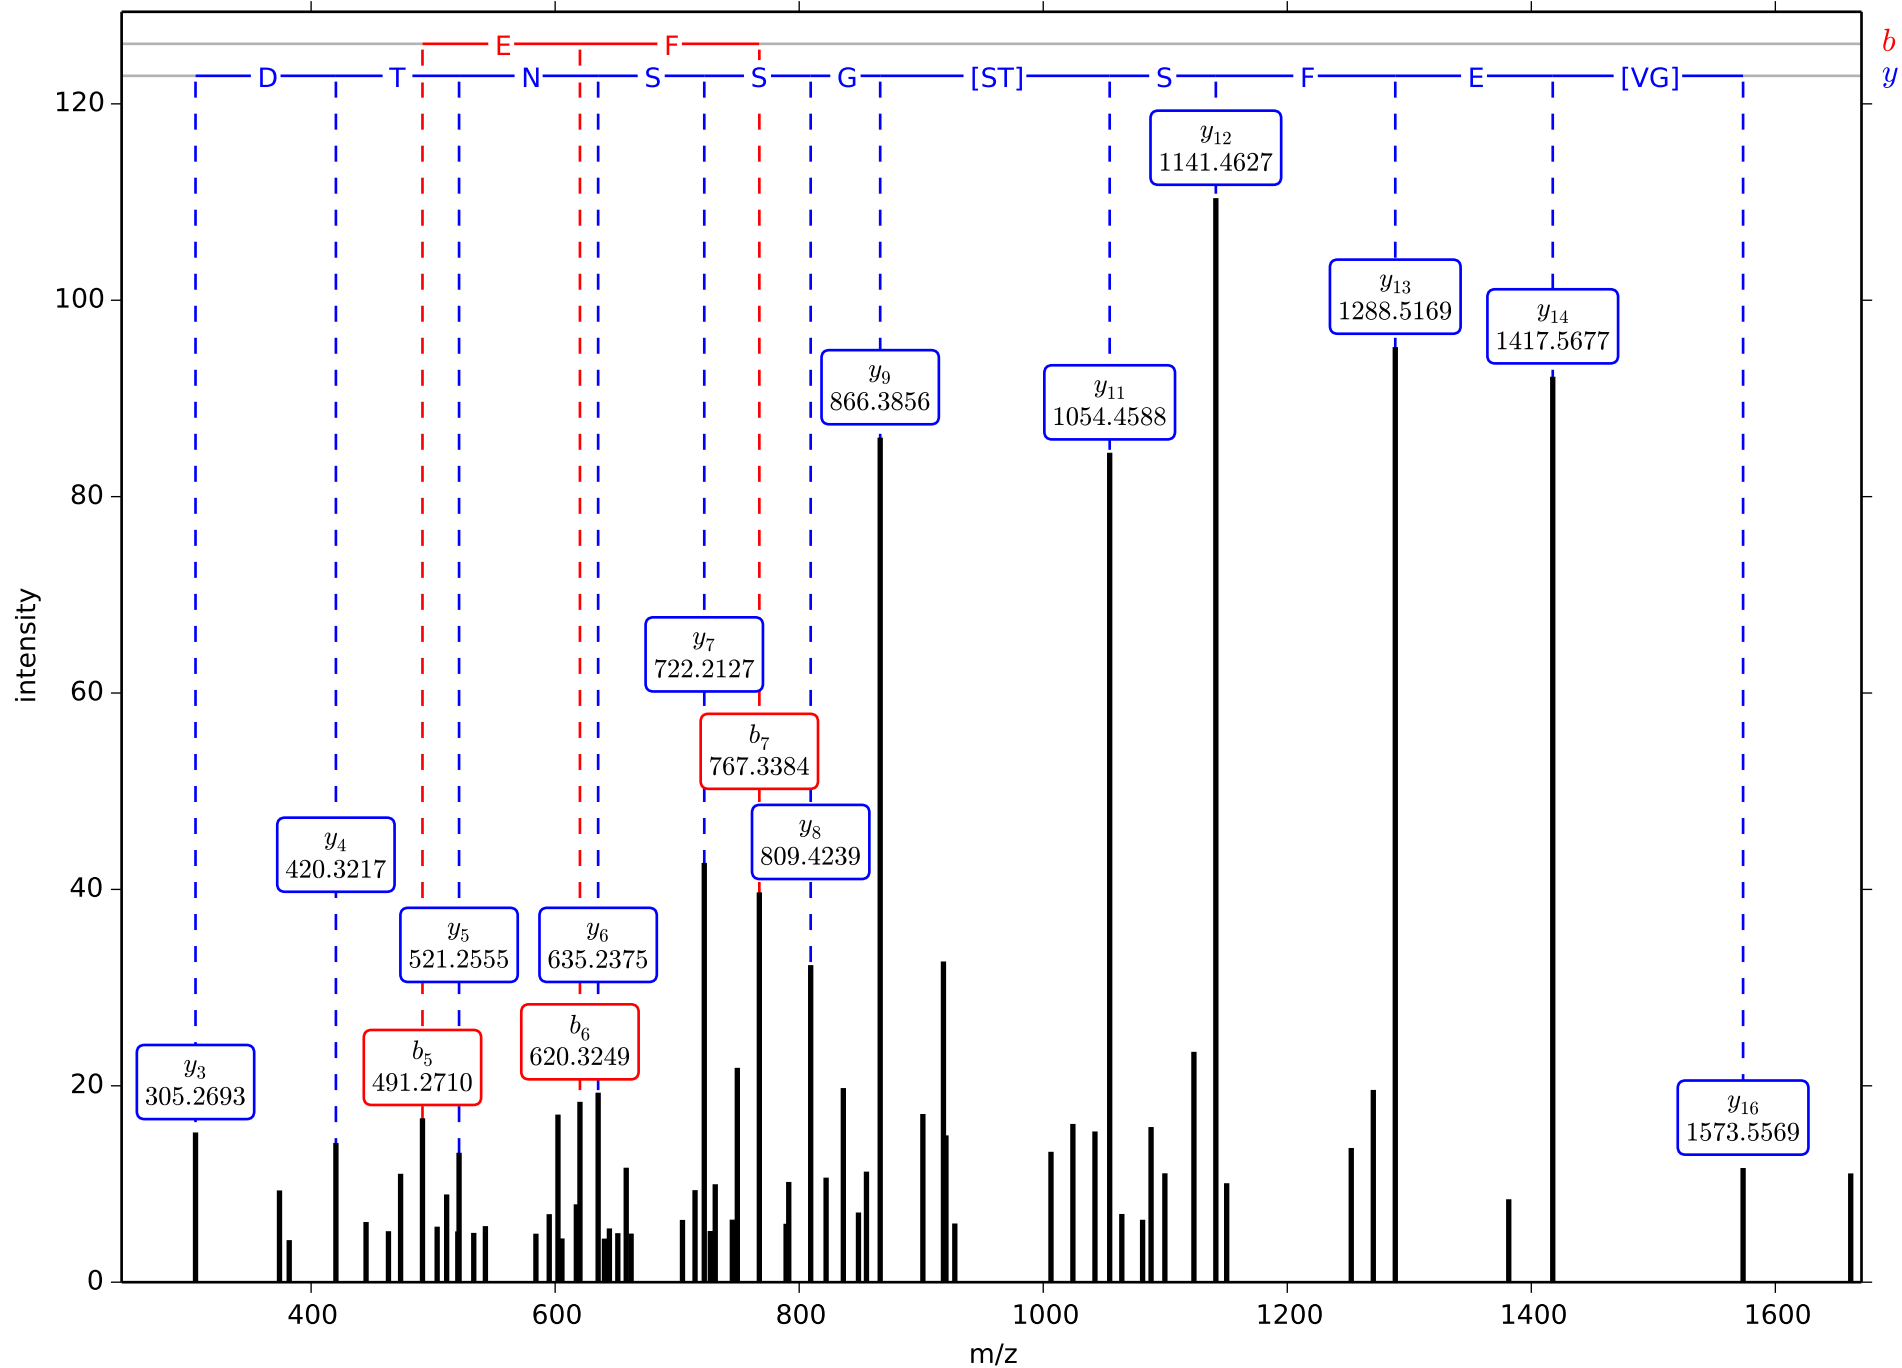



Q60930 : WNTDNTLGTEIAIEDQICQGLK

parent: 1260.118400,2+

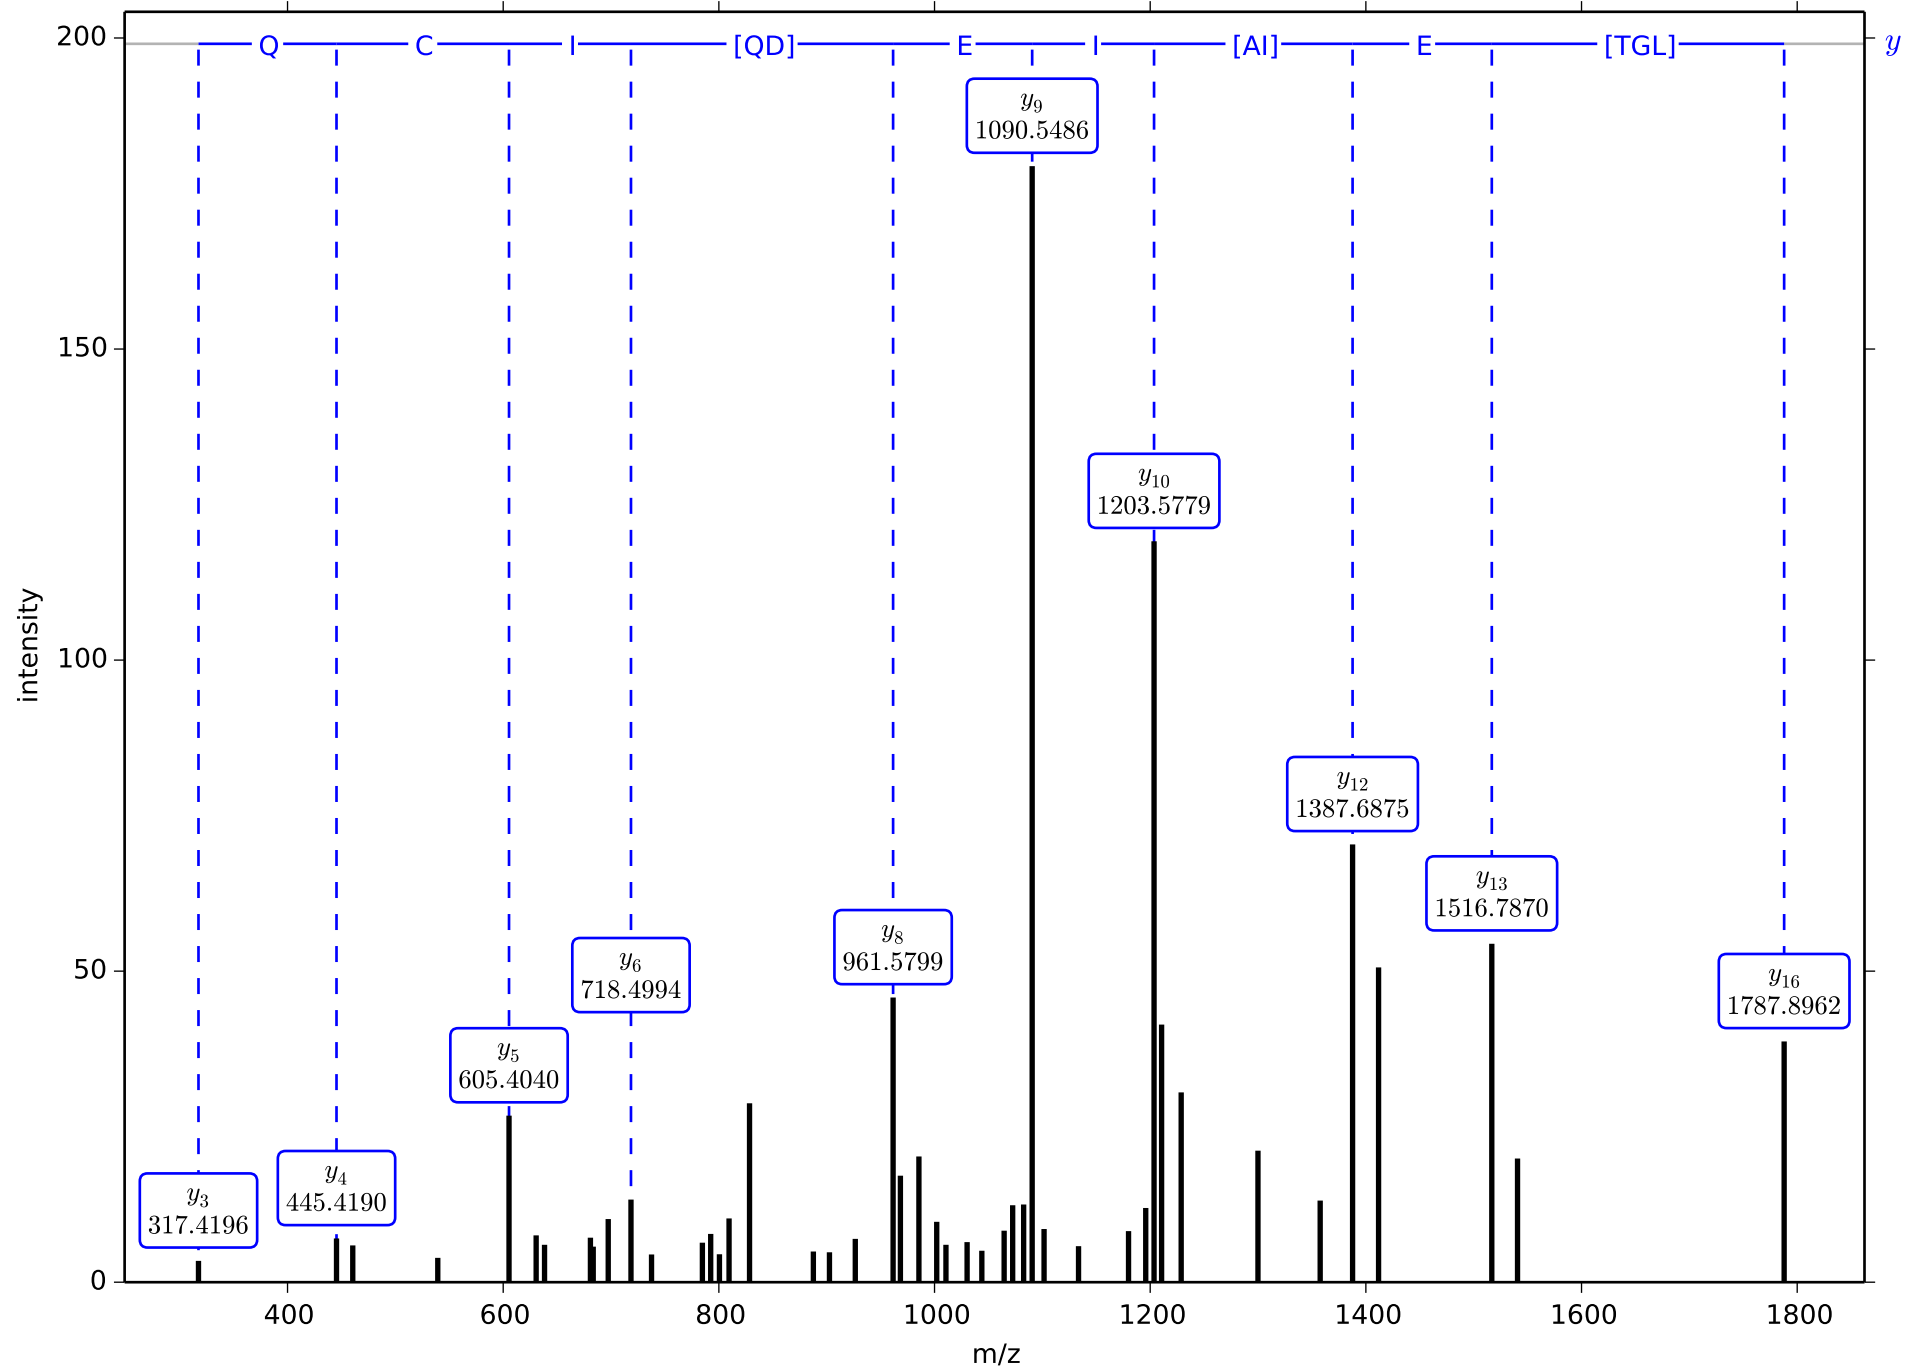

# Q60930 : WCEYGLTFTEK

parent: 717.323760,2+

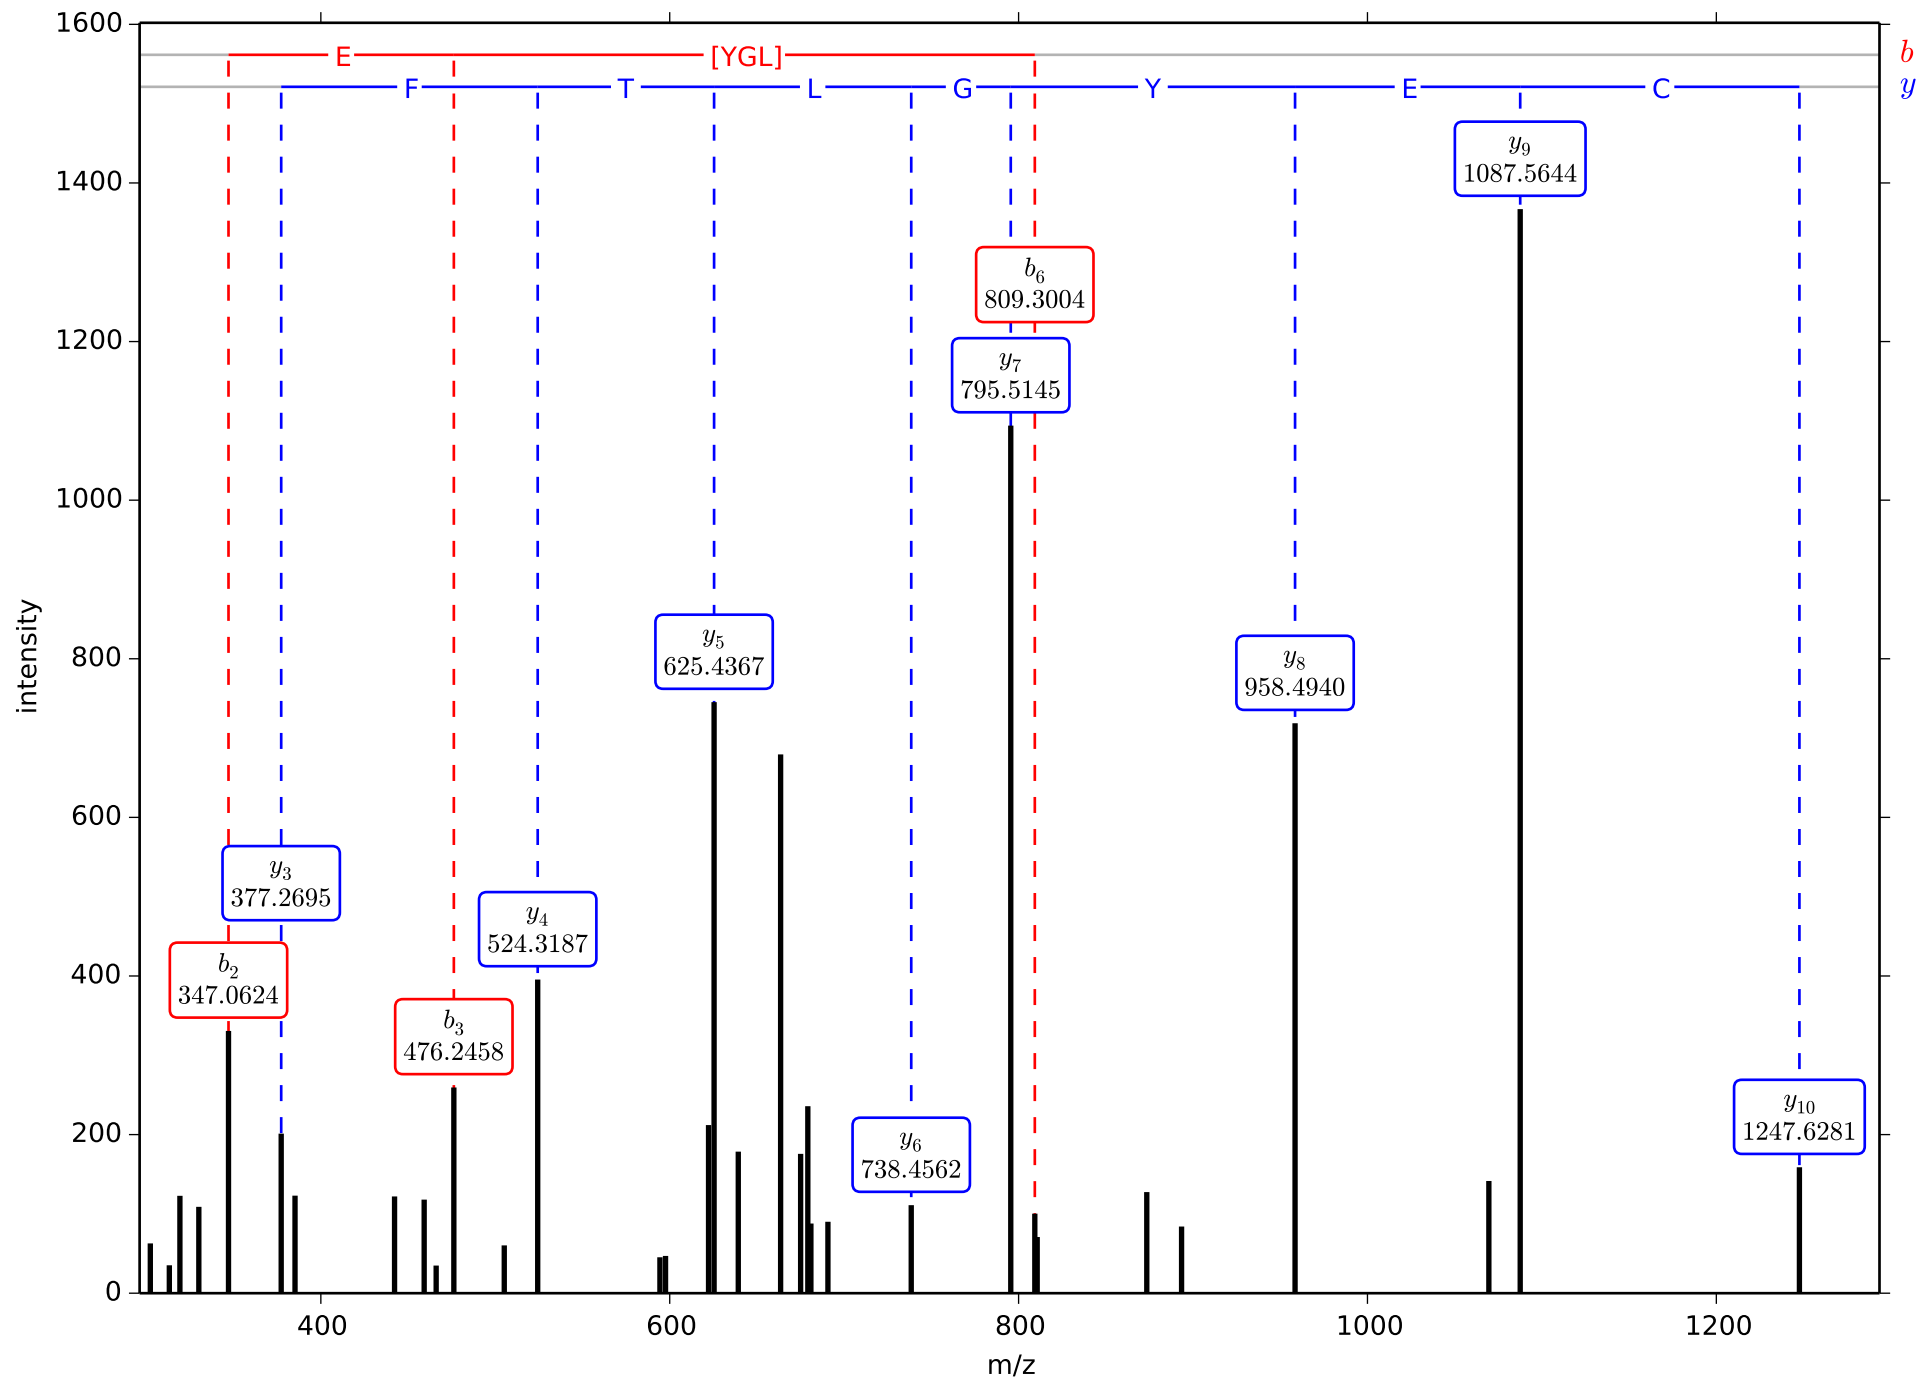

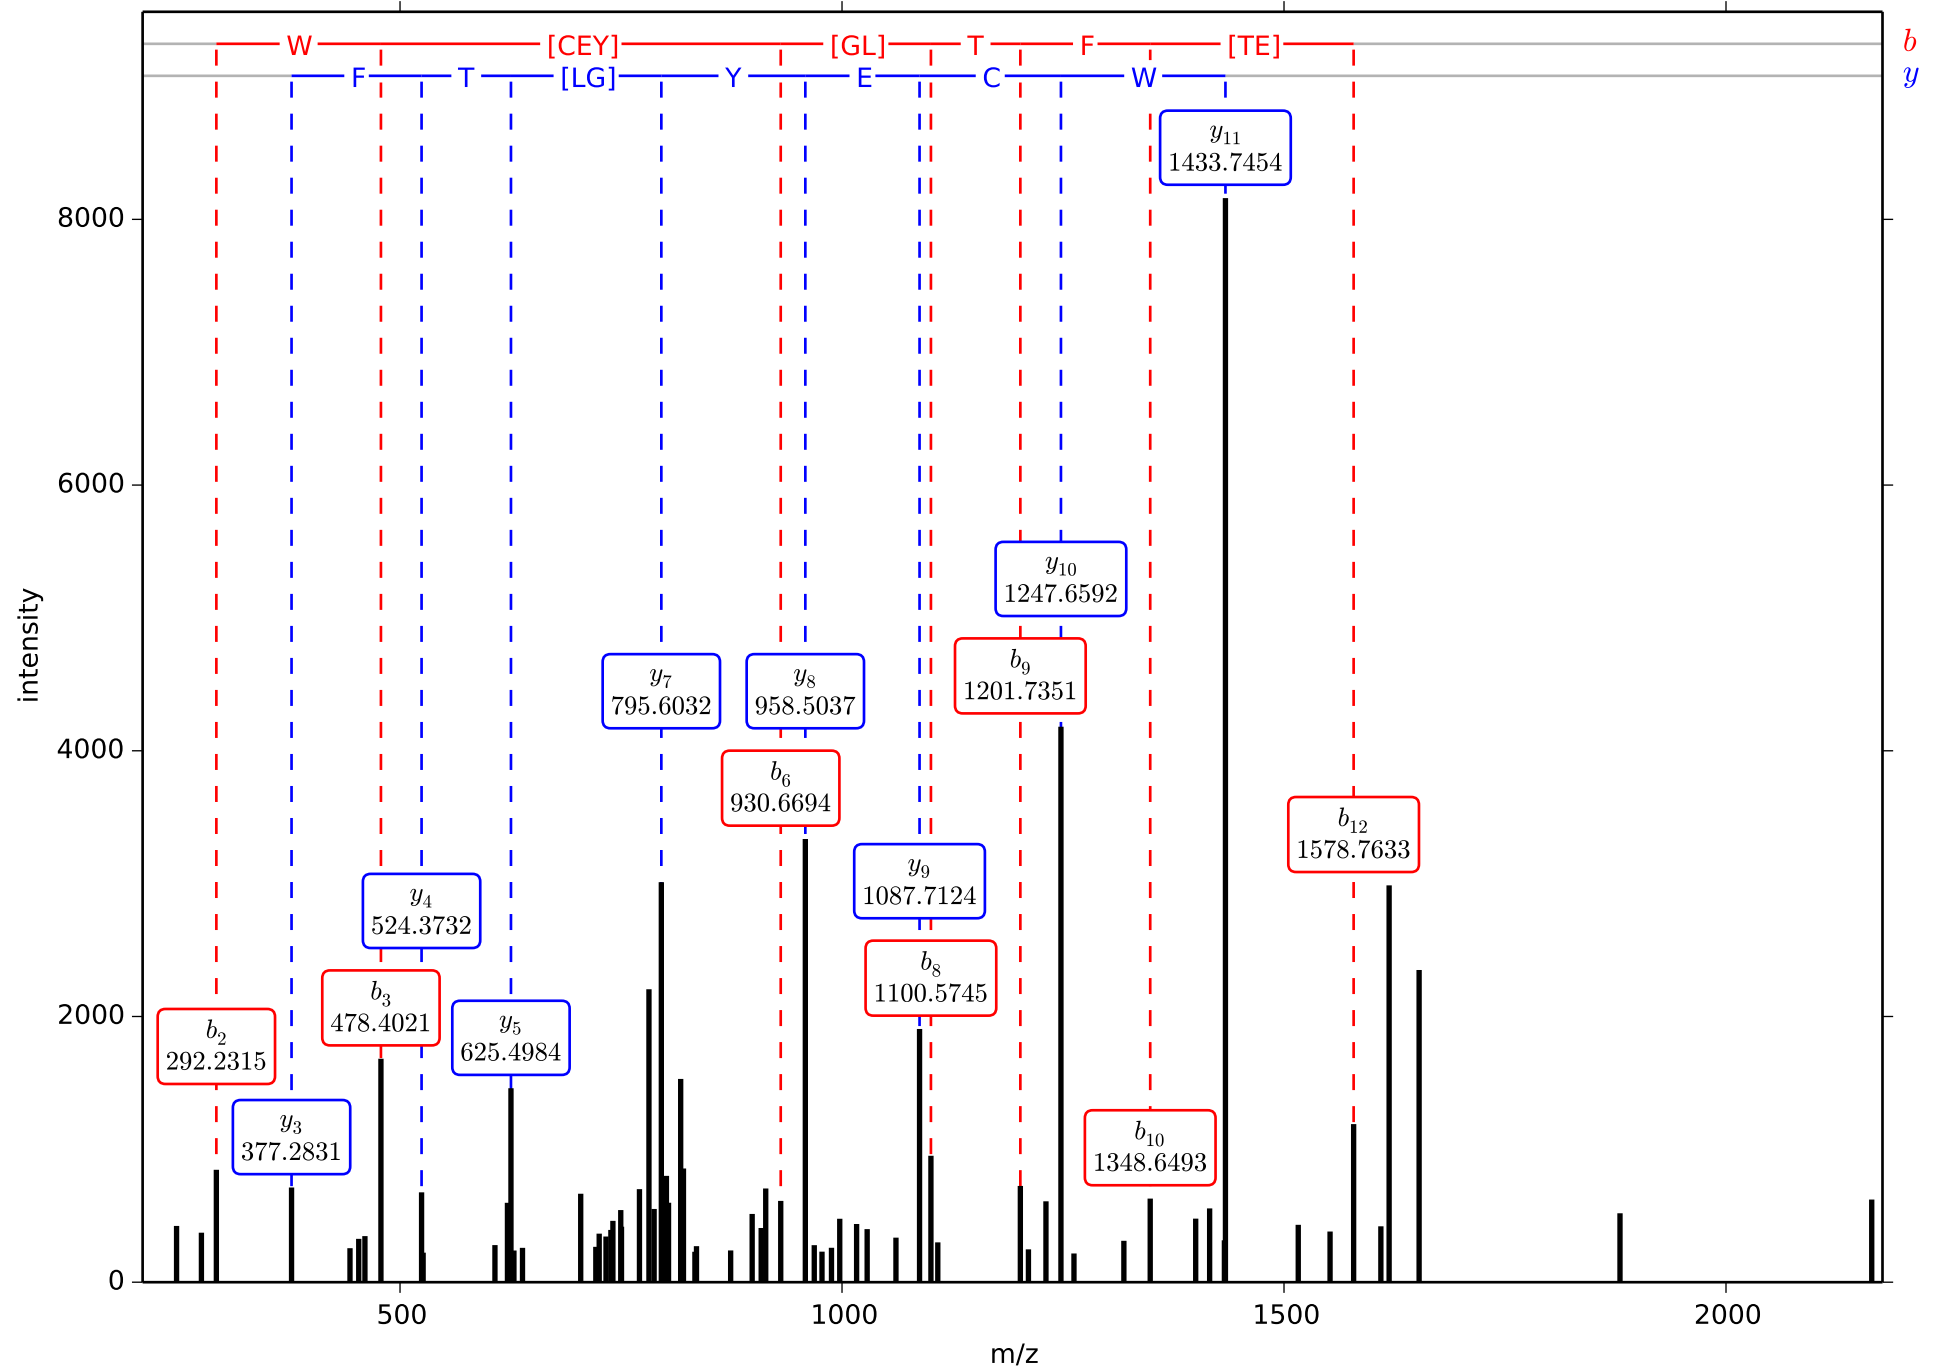

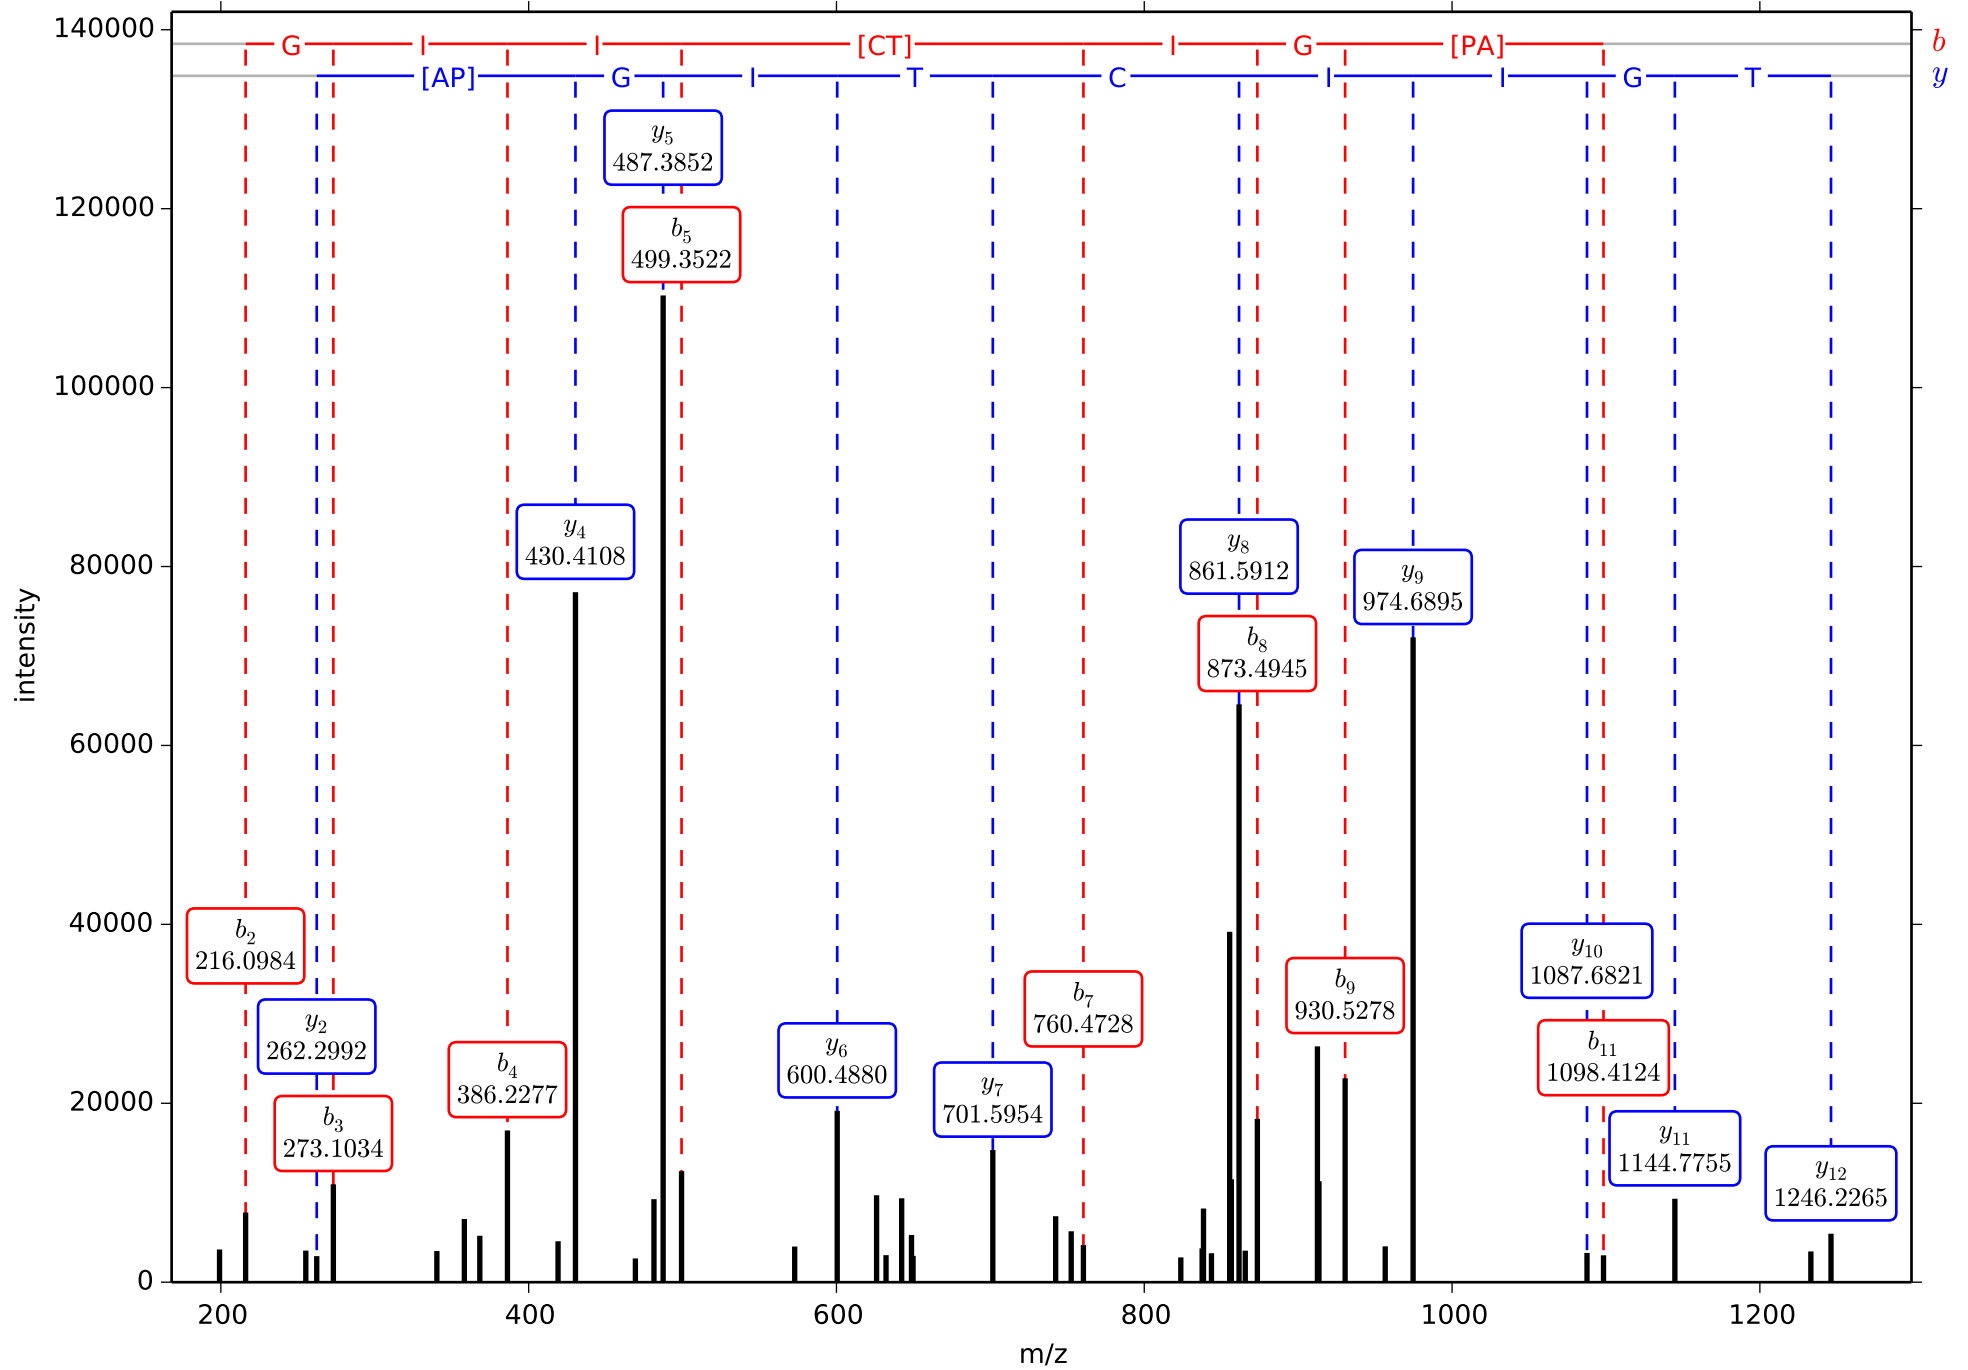

P52480 : CDENILWLDYK

parent: 734.840600,2+

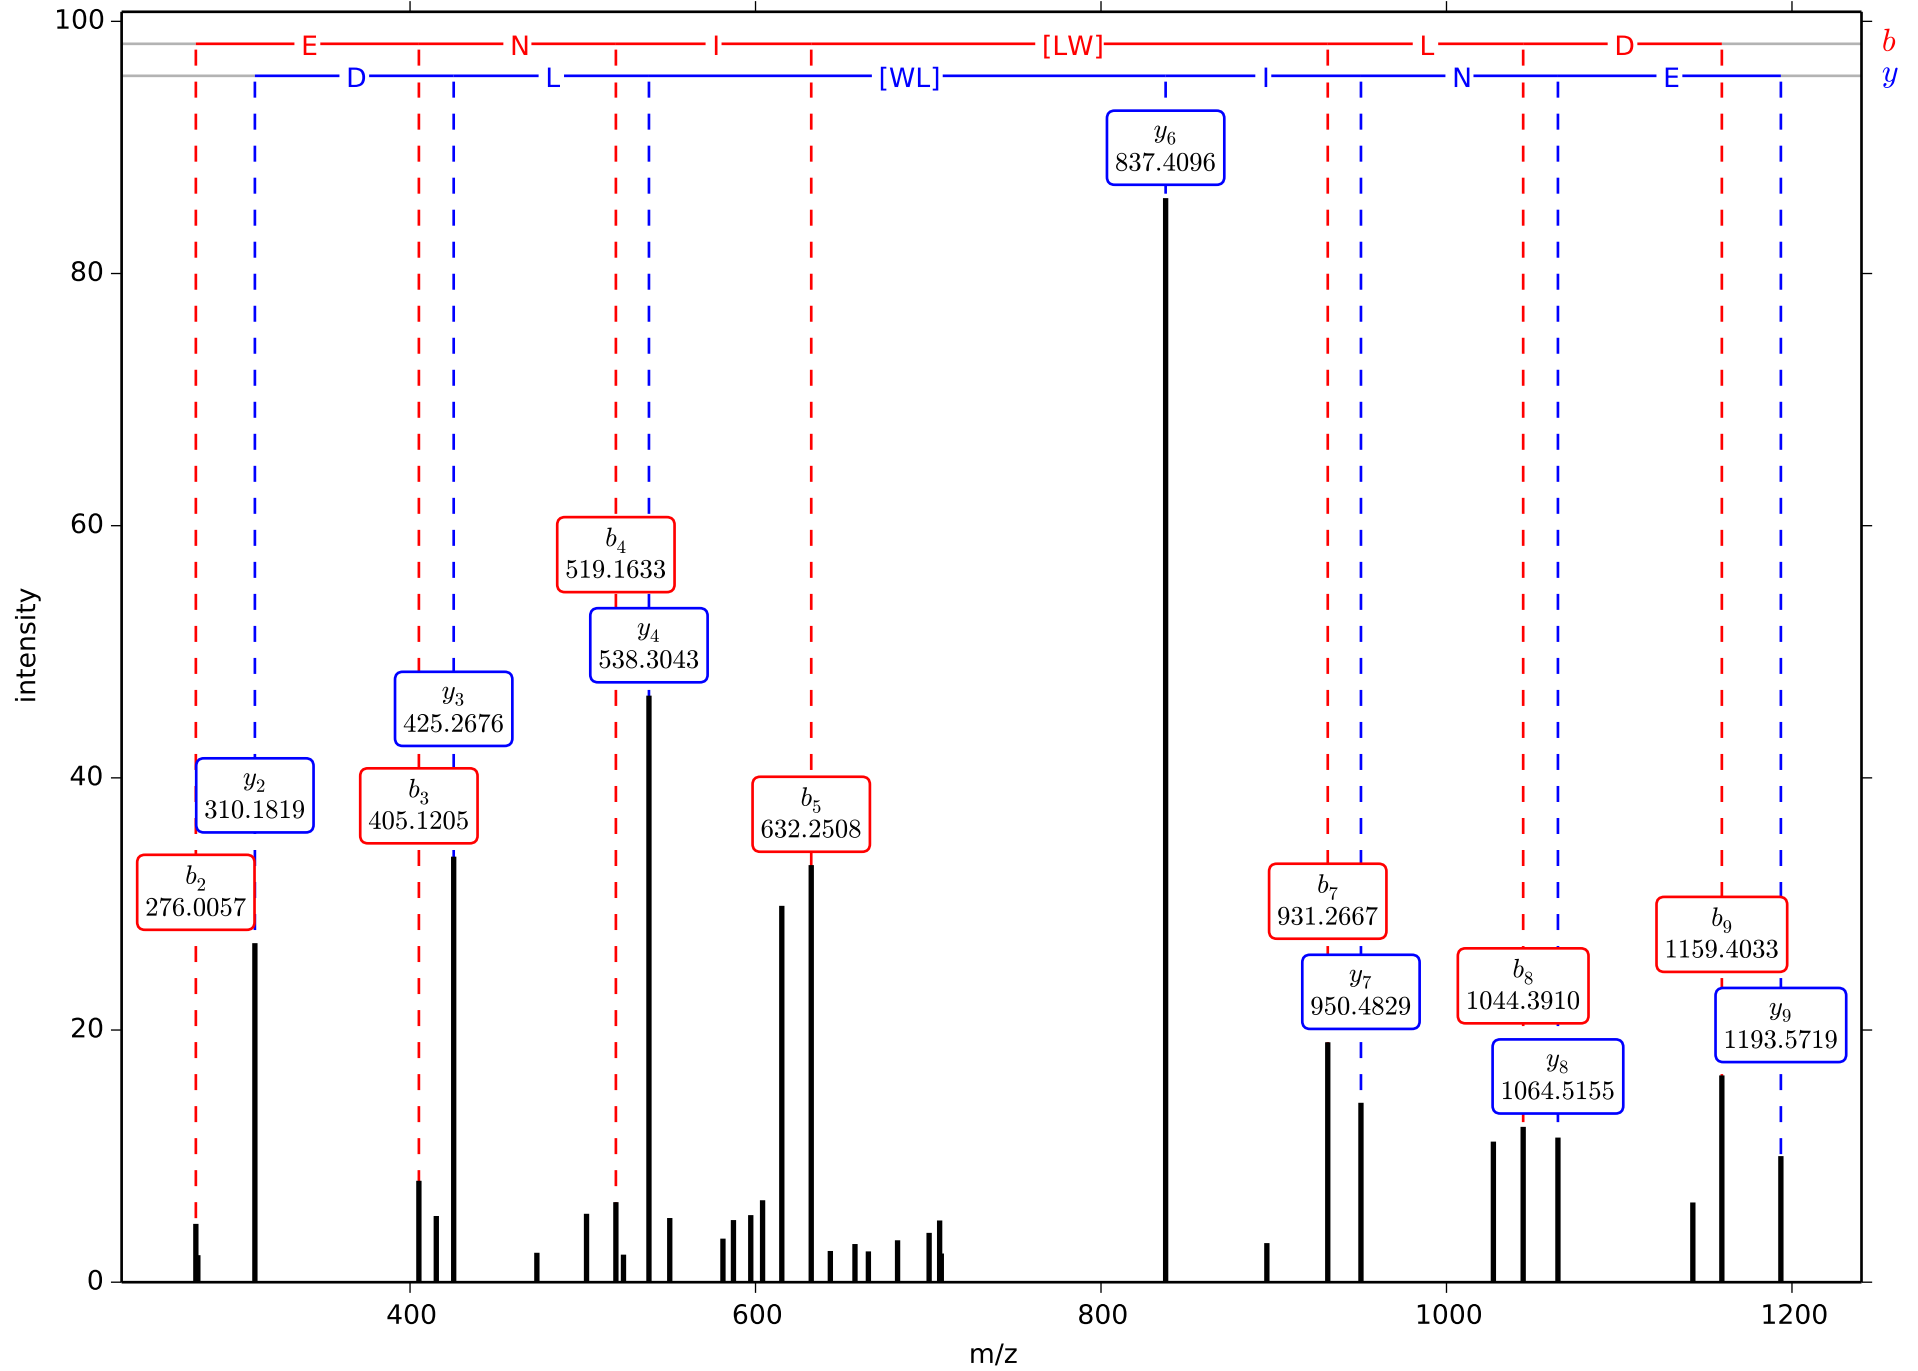

# P52480 : GIFPVLCK

parent: 467.266930,2+

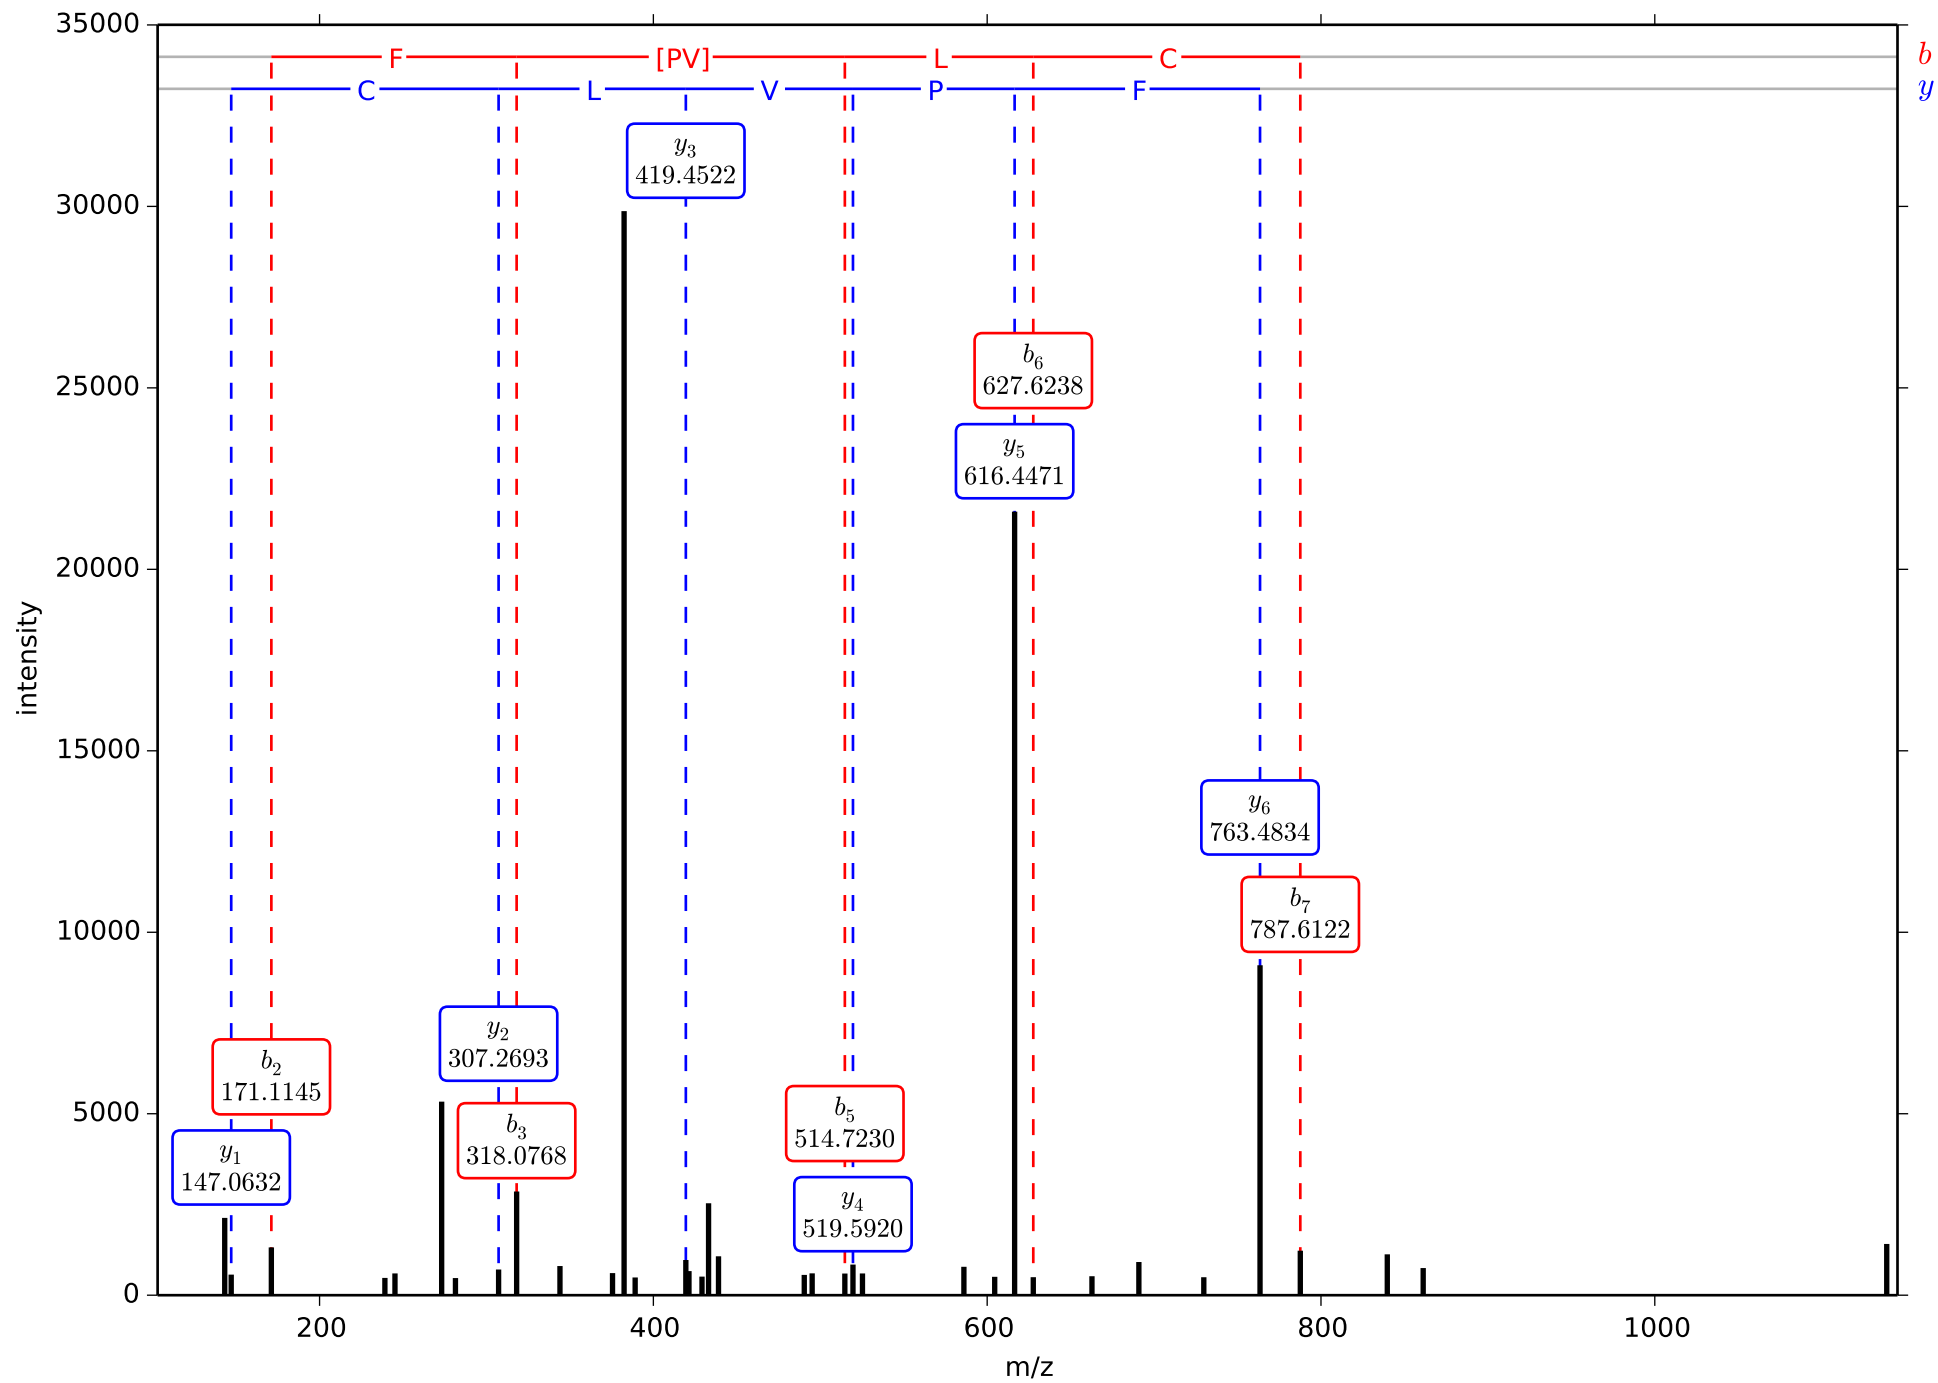

P68368 : AYHEQLSVAEITNACFEPANQMVK

parent: 1375.668400,2+

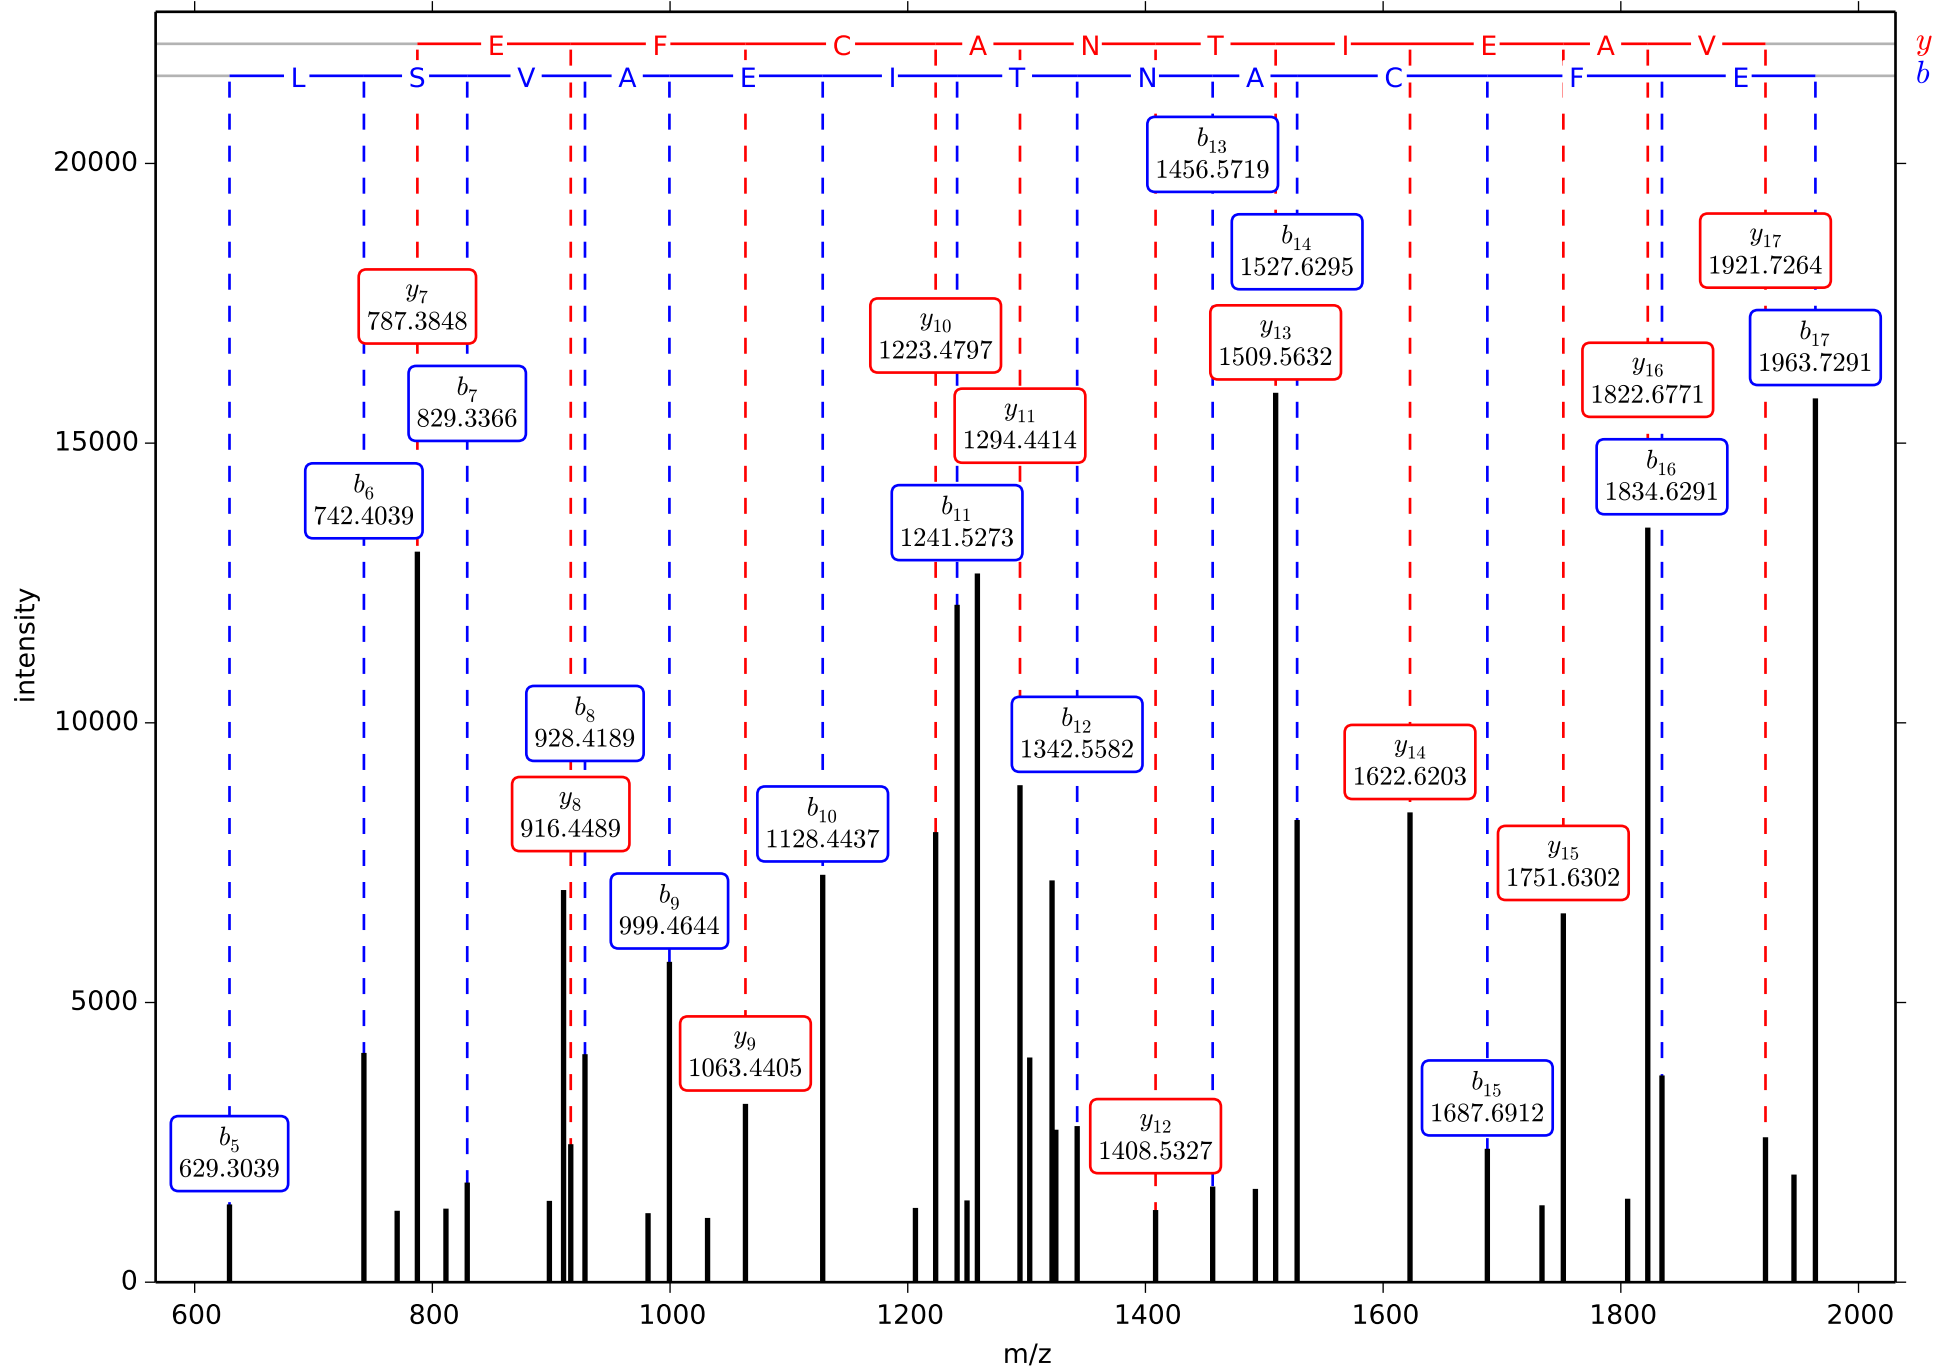

P68368 : AVCMLSNTTAAEAWAR

parent: 940.939630,2+

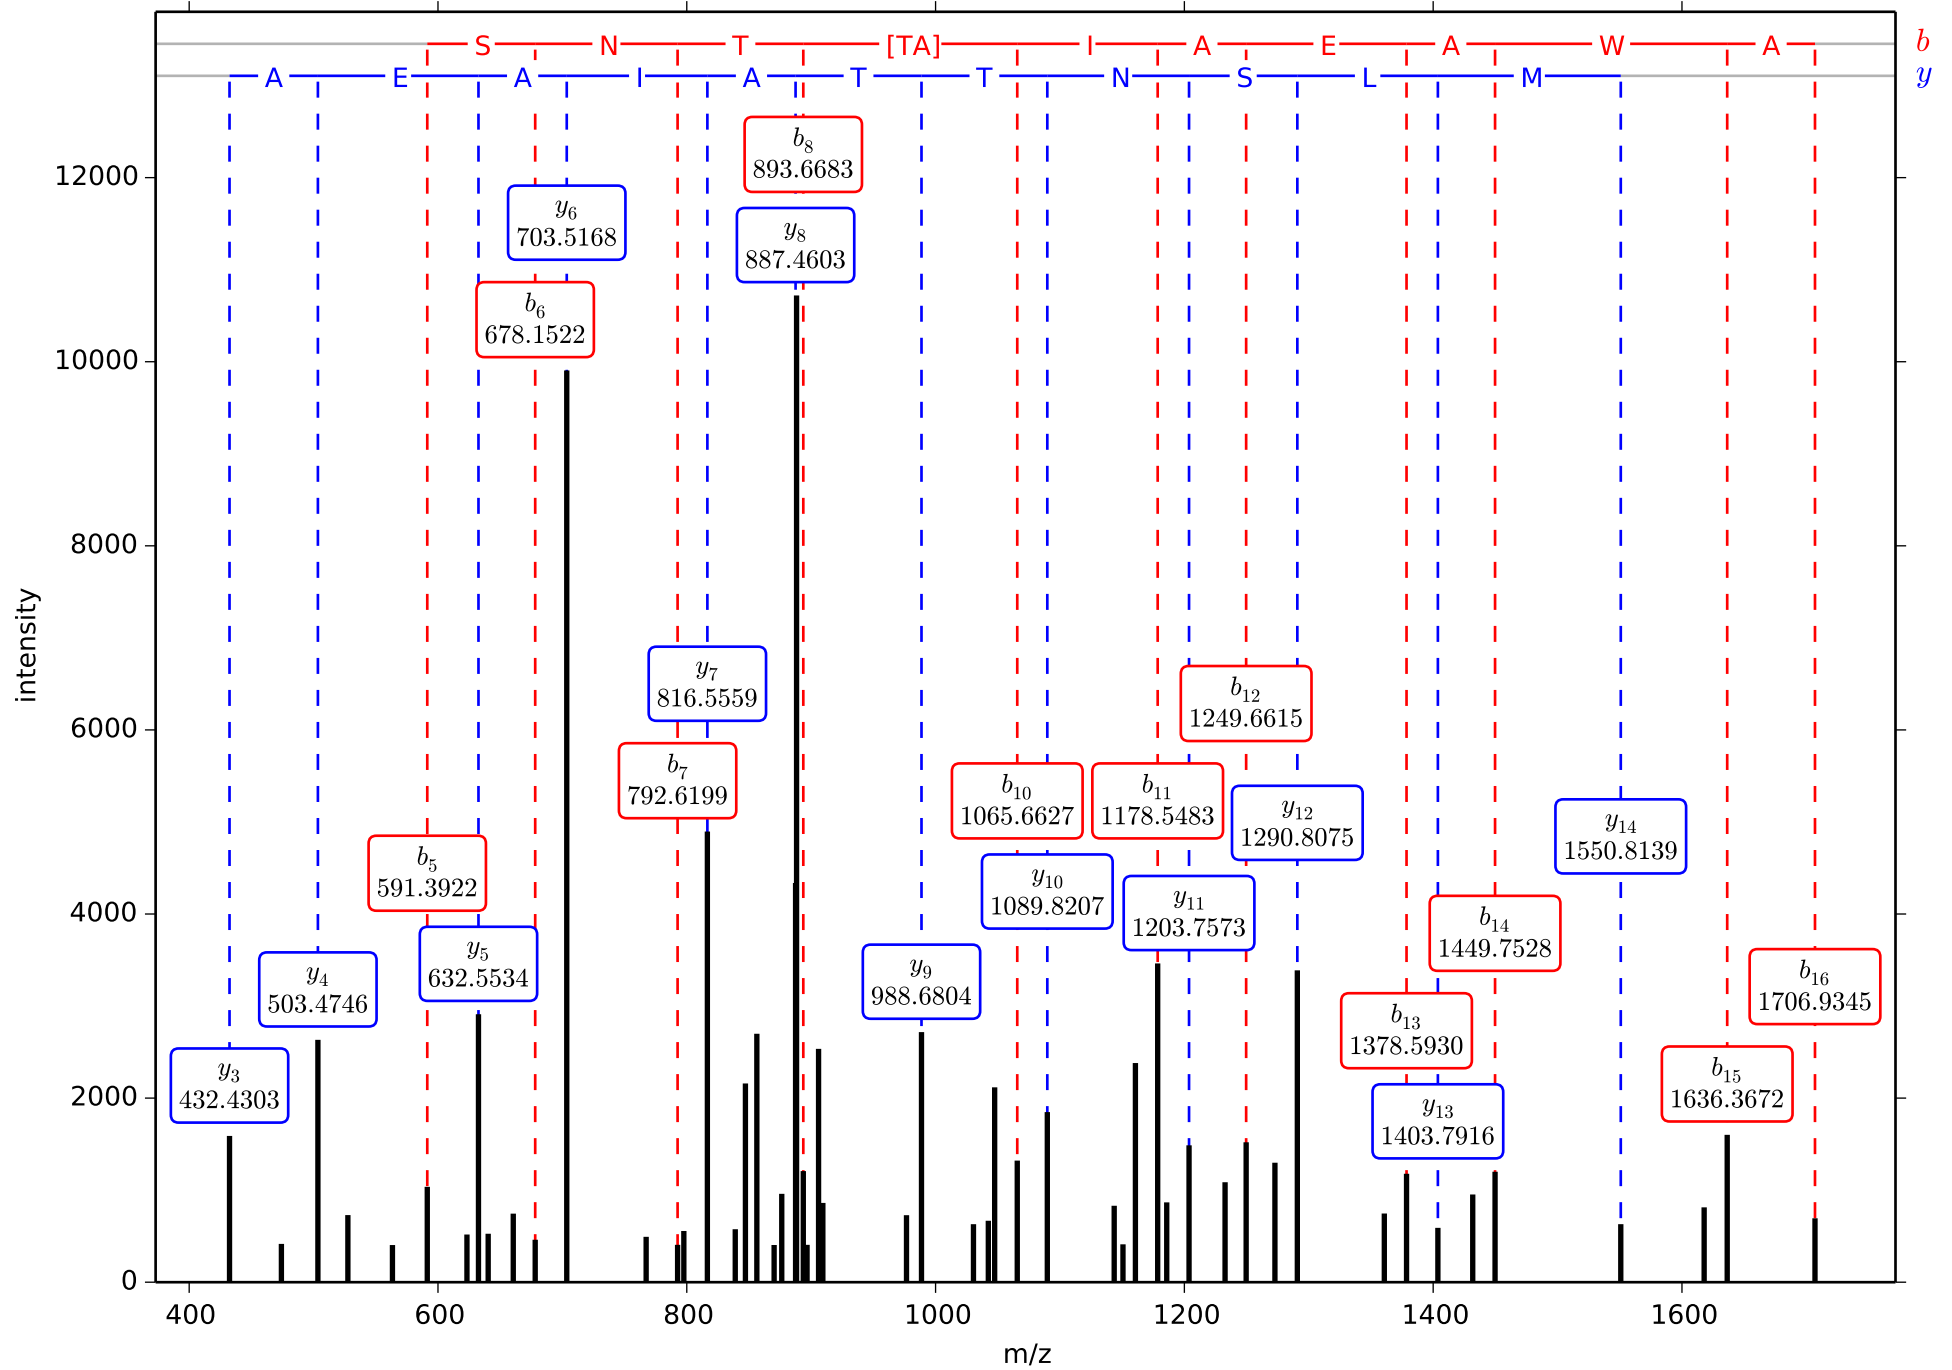



P68368 : TIGGGDDSFTTFFCETGAGK

parent: 1034.458800,2+

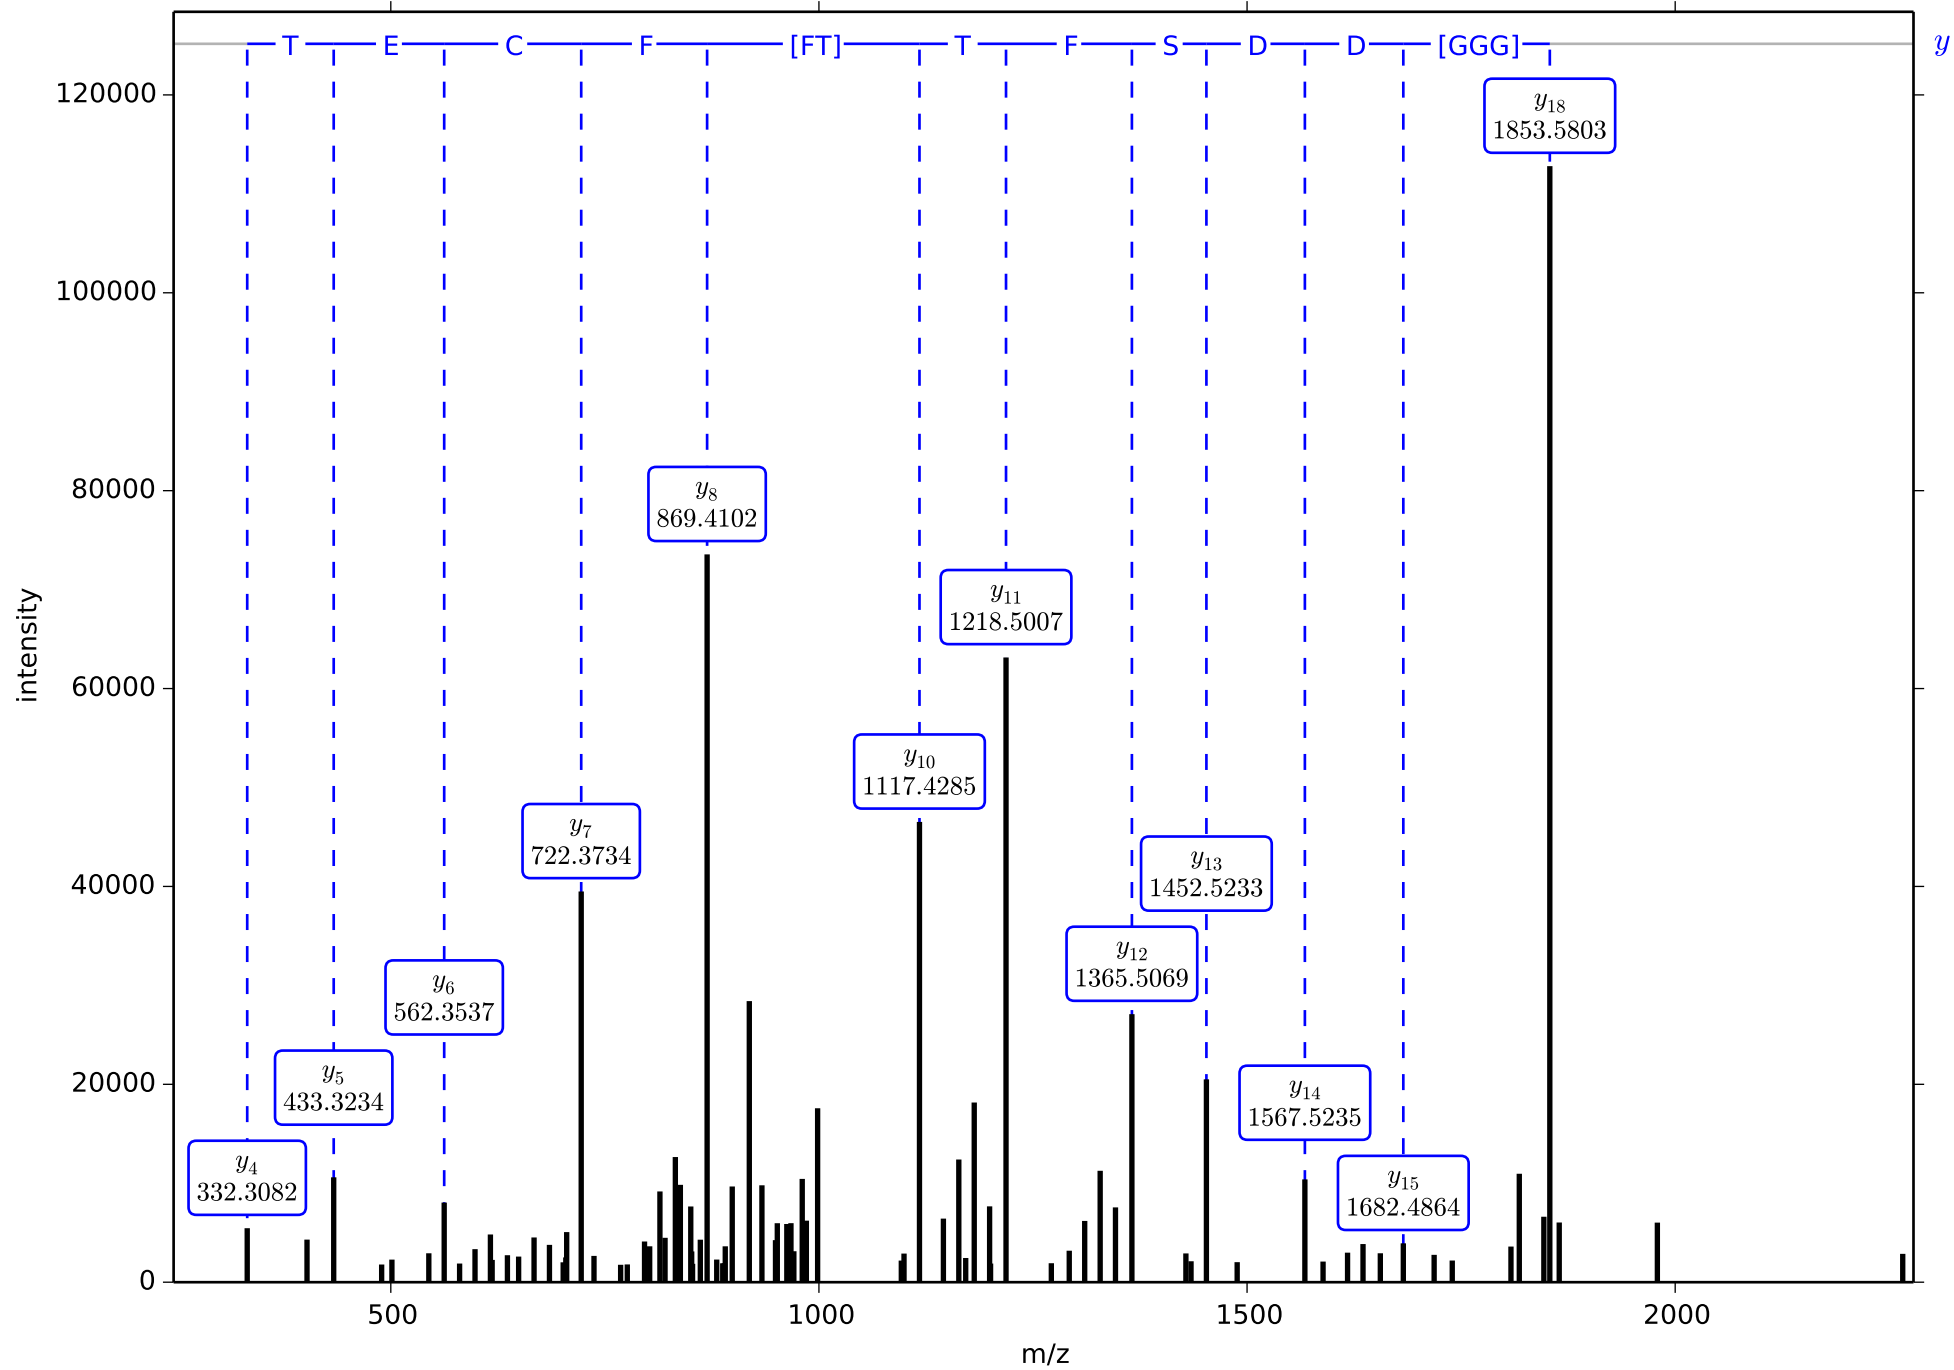

P68368 : SIQFVDWCPTGFK

parent: 792.889060,2+

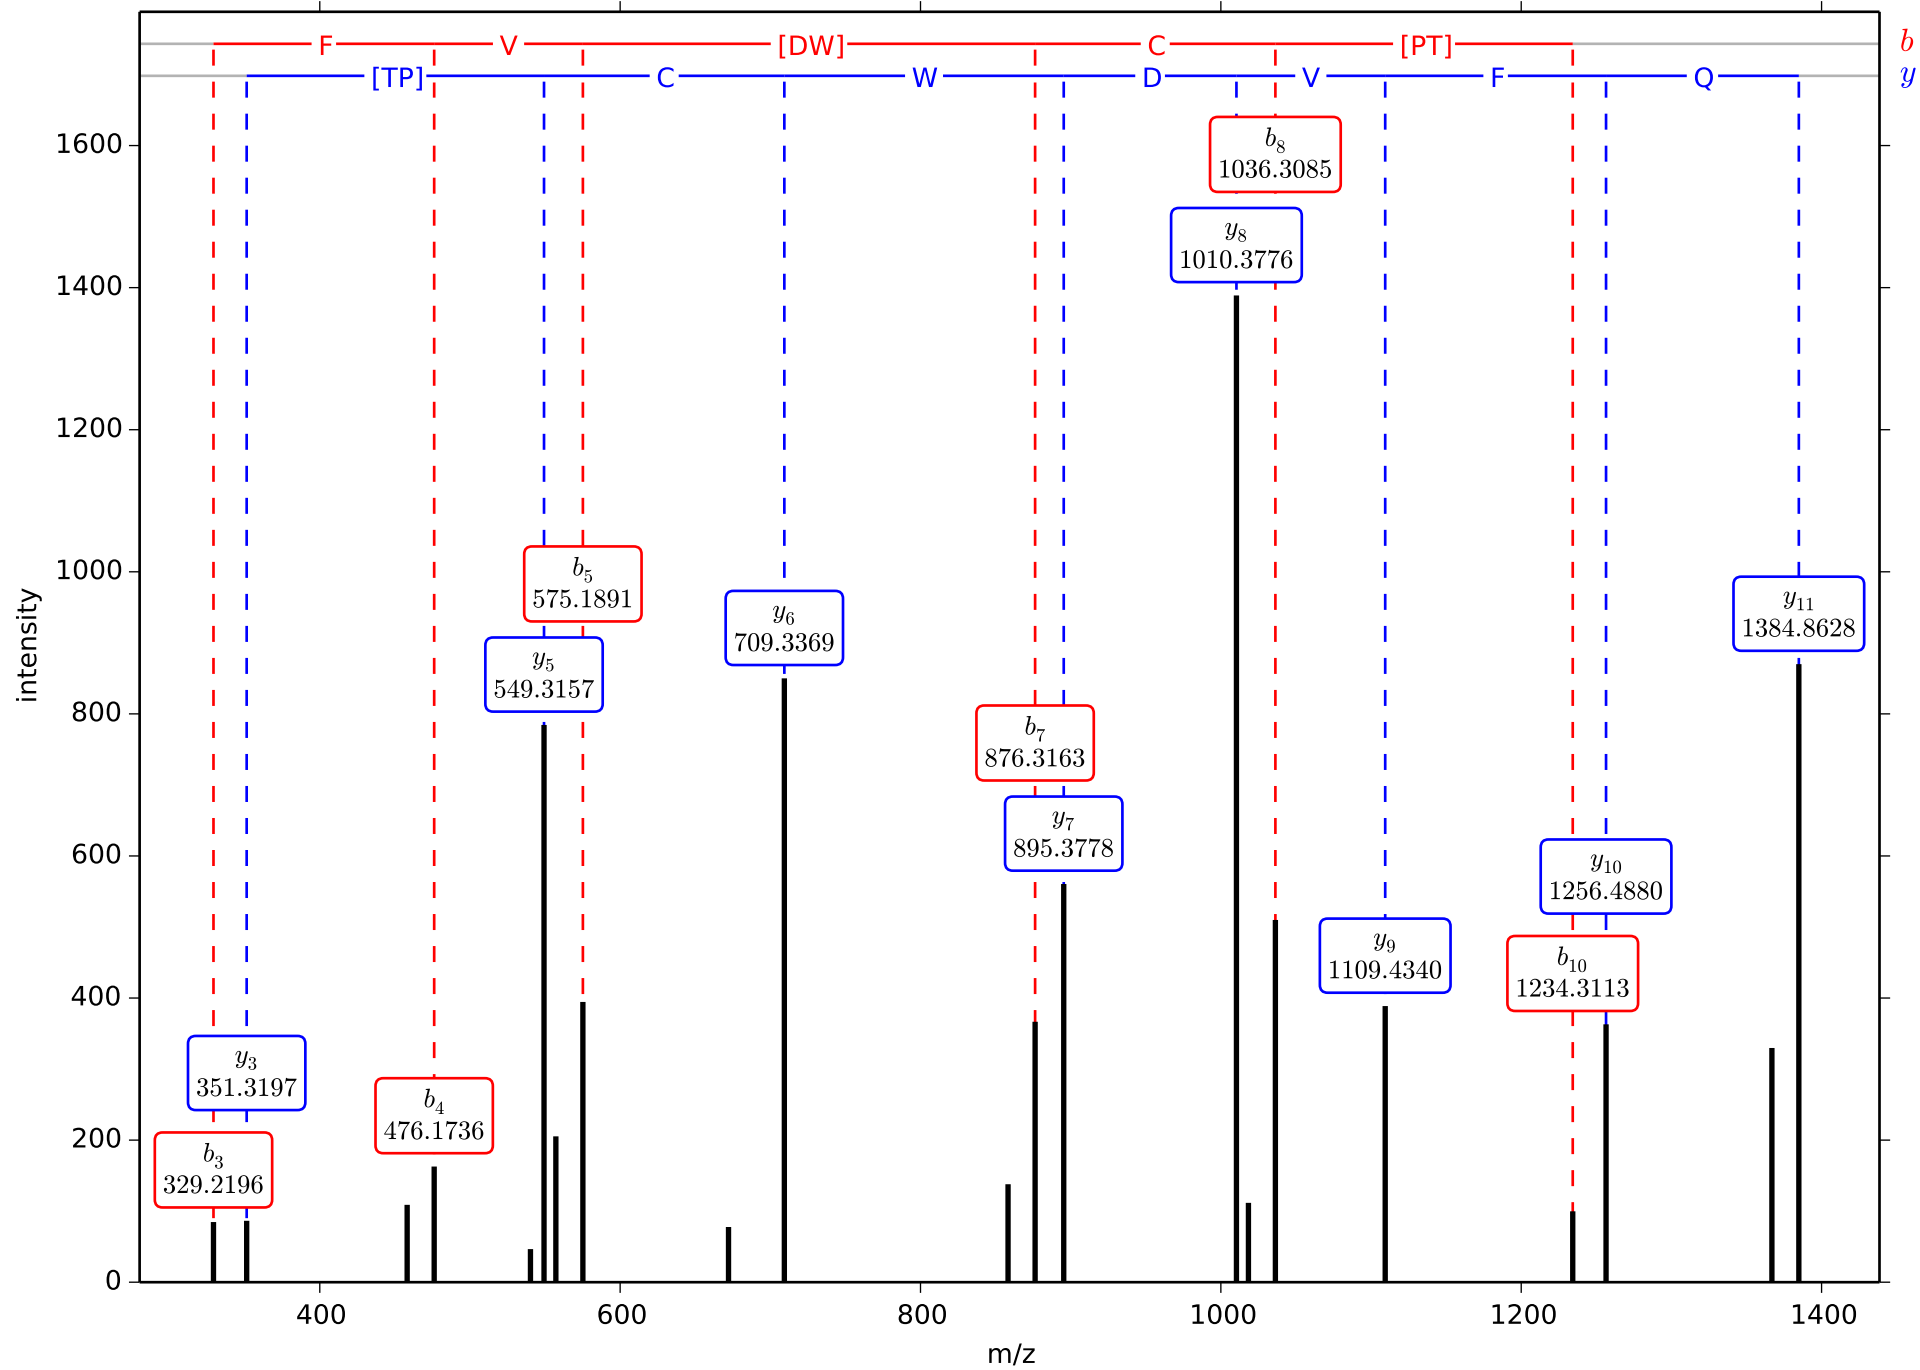

Q8VDN2 : NIAFFSTNCVEGTAR

parent: 843.910110,2+

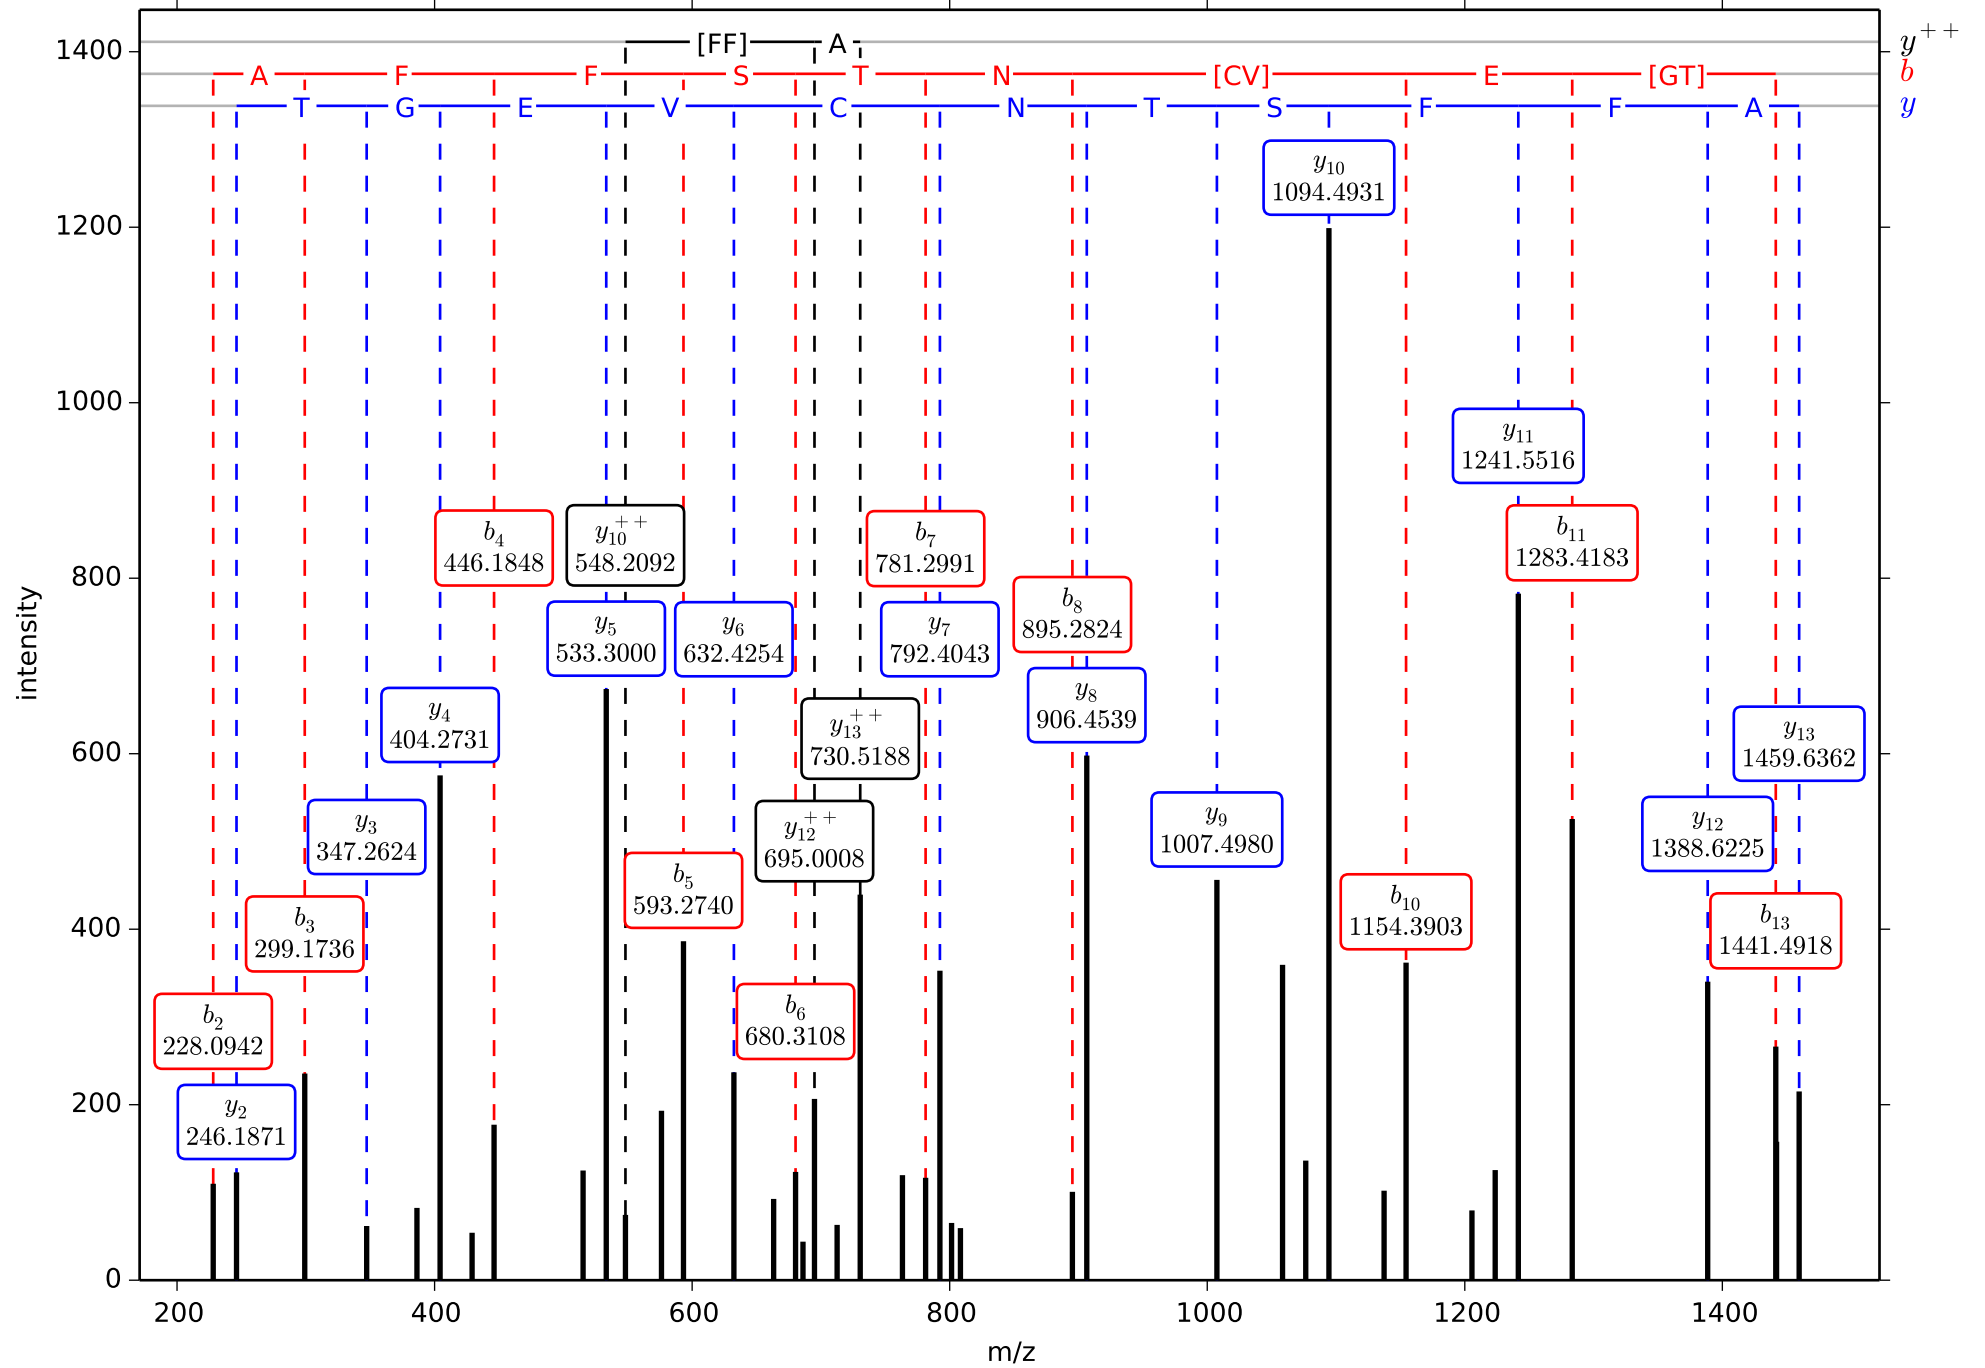

Q8VDN2 : NLEAVETLGSTSTICSDKTGTLTQNR

parent: 932.791090,3+

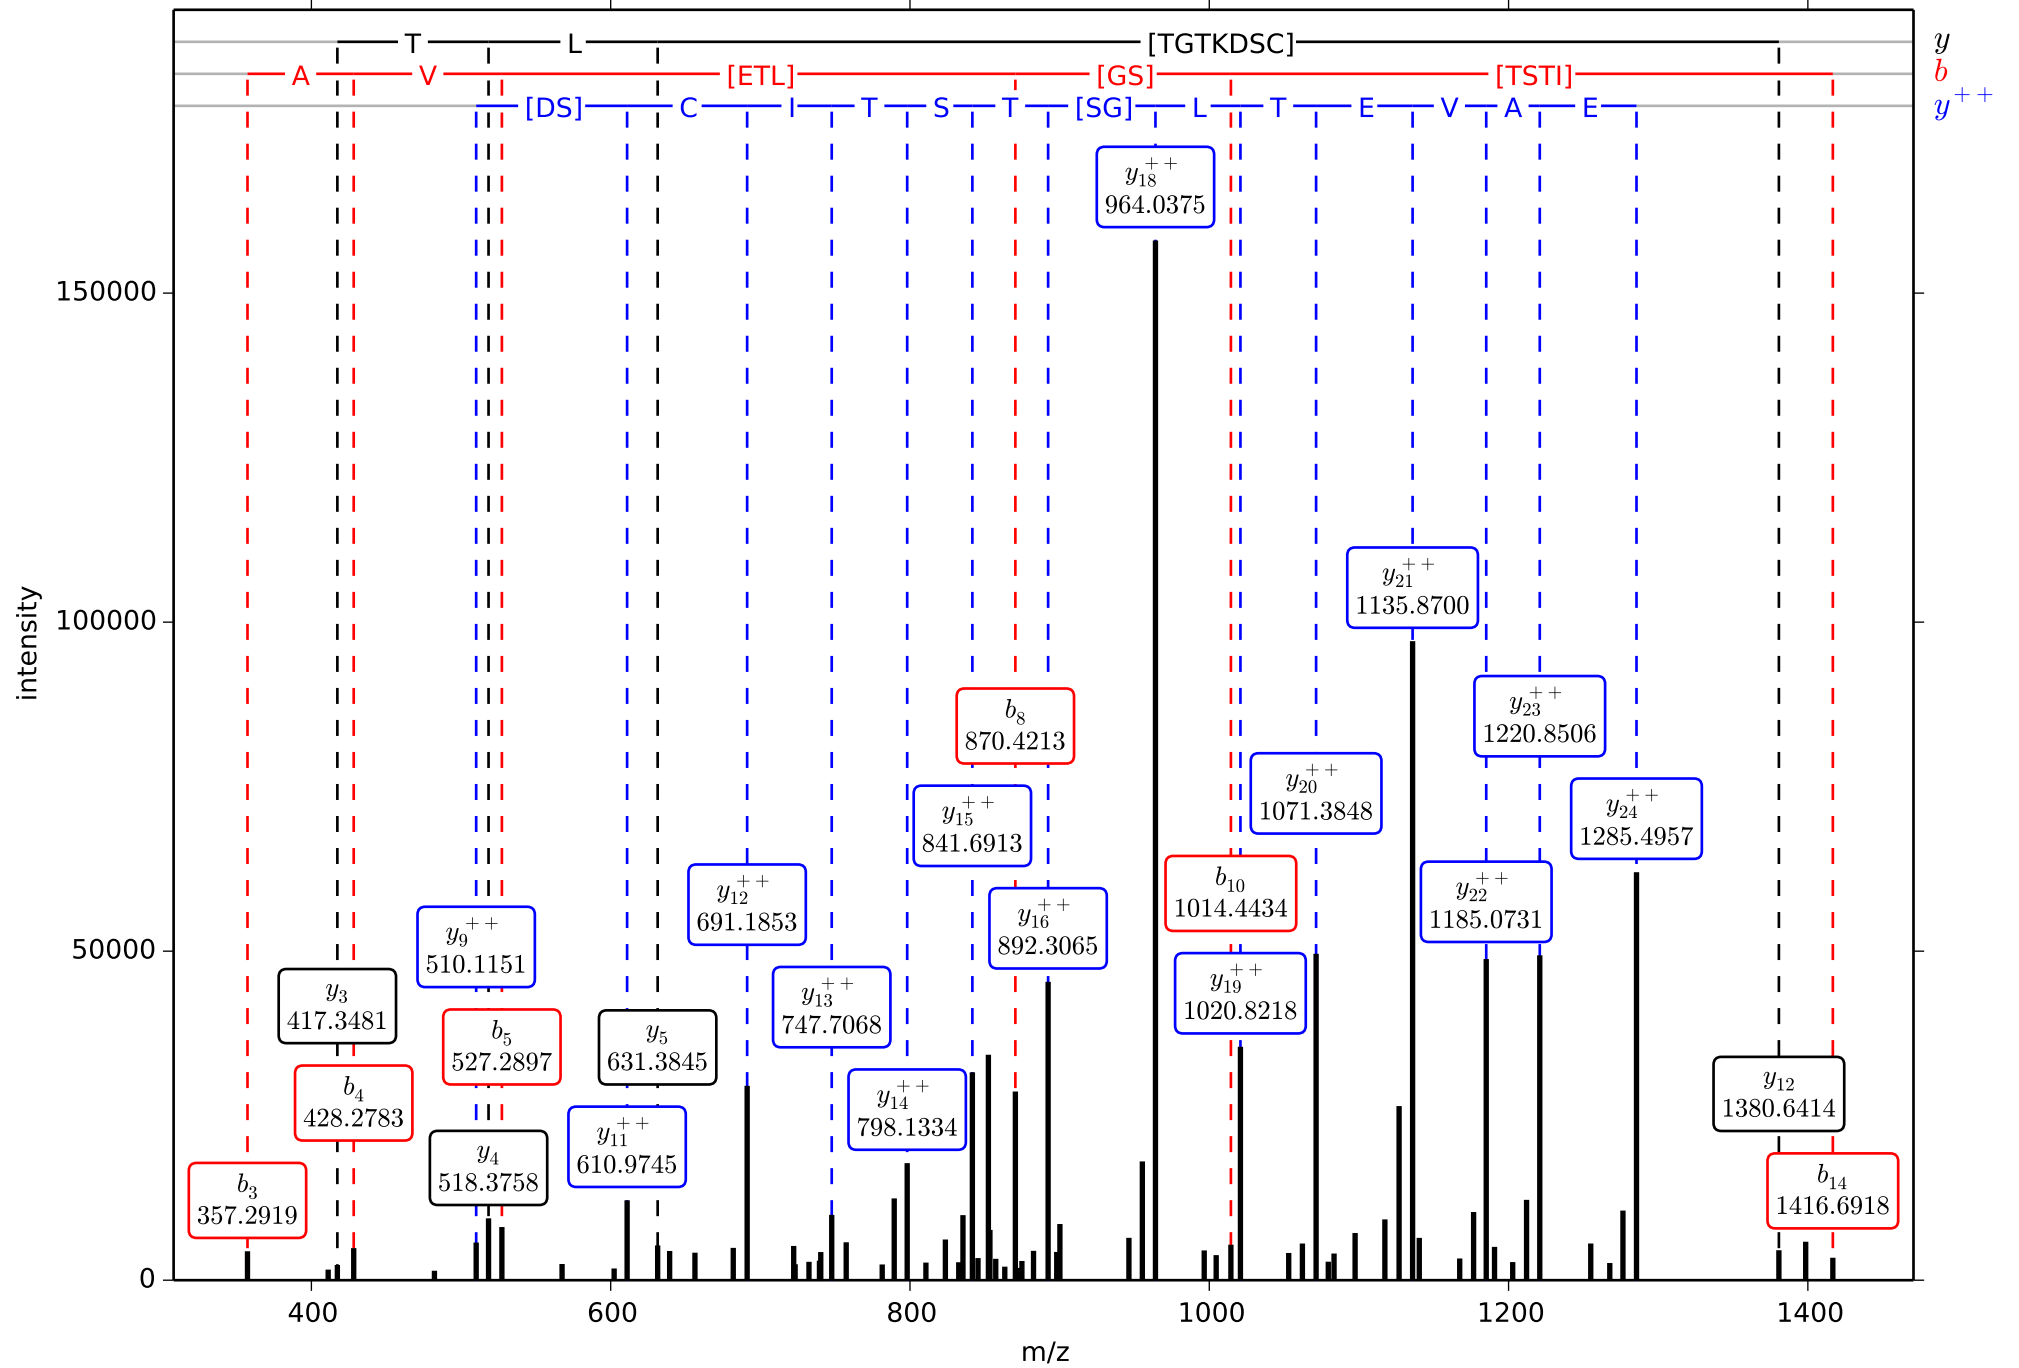

Q8VDN2 : IISANGCKVDNSSLTGESEPQTR

parent: 1232.111700,2+

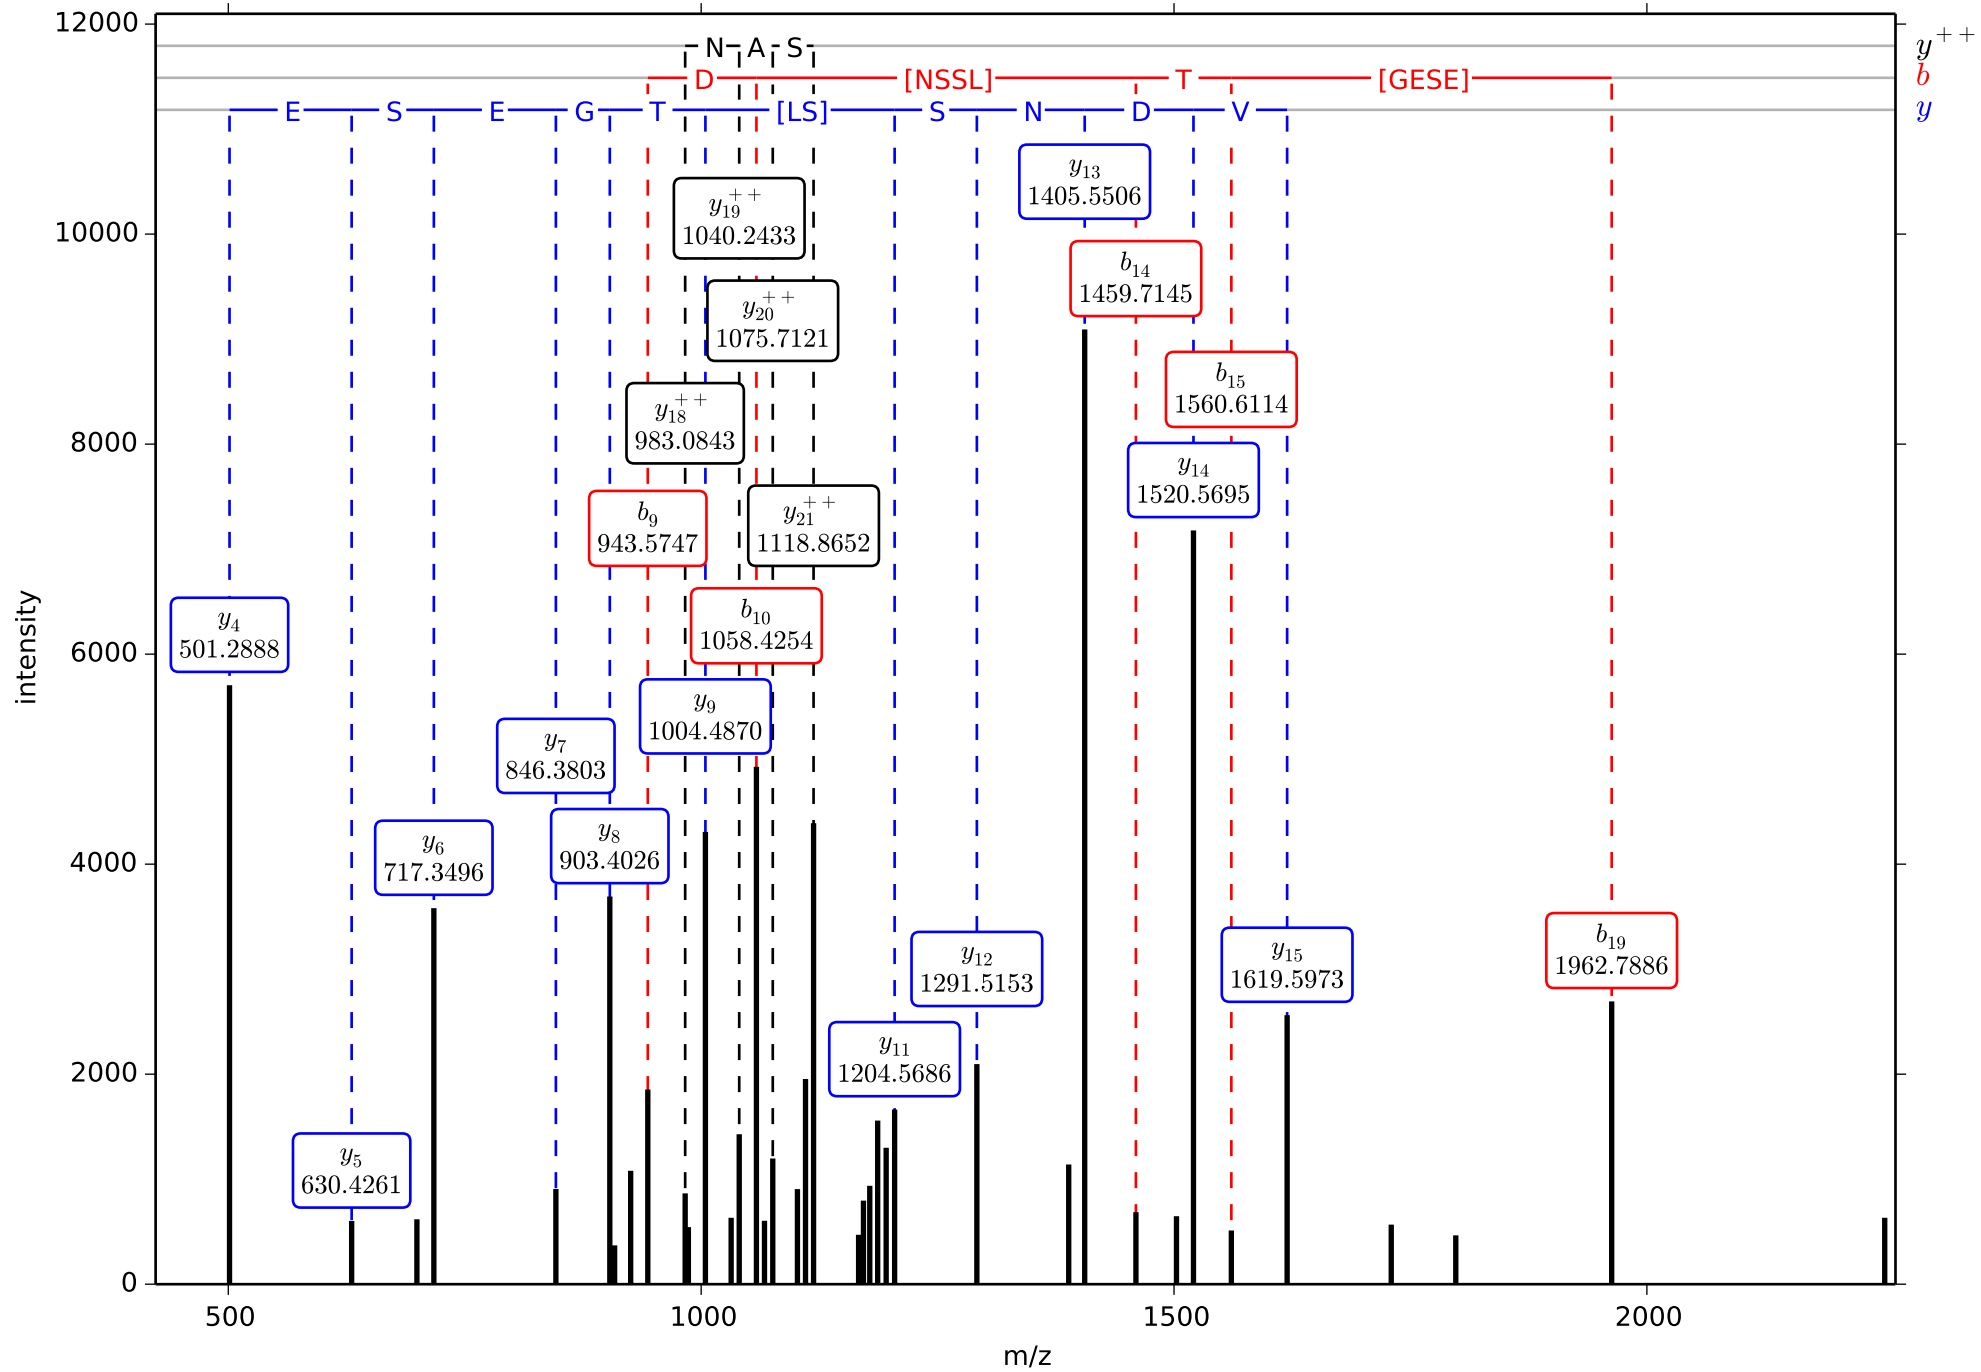

Q8VDN2 : ACVVHGSDLK

parent: 543.275060,2+

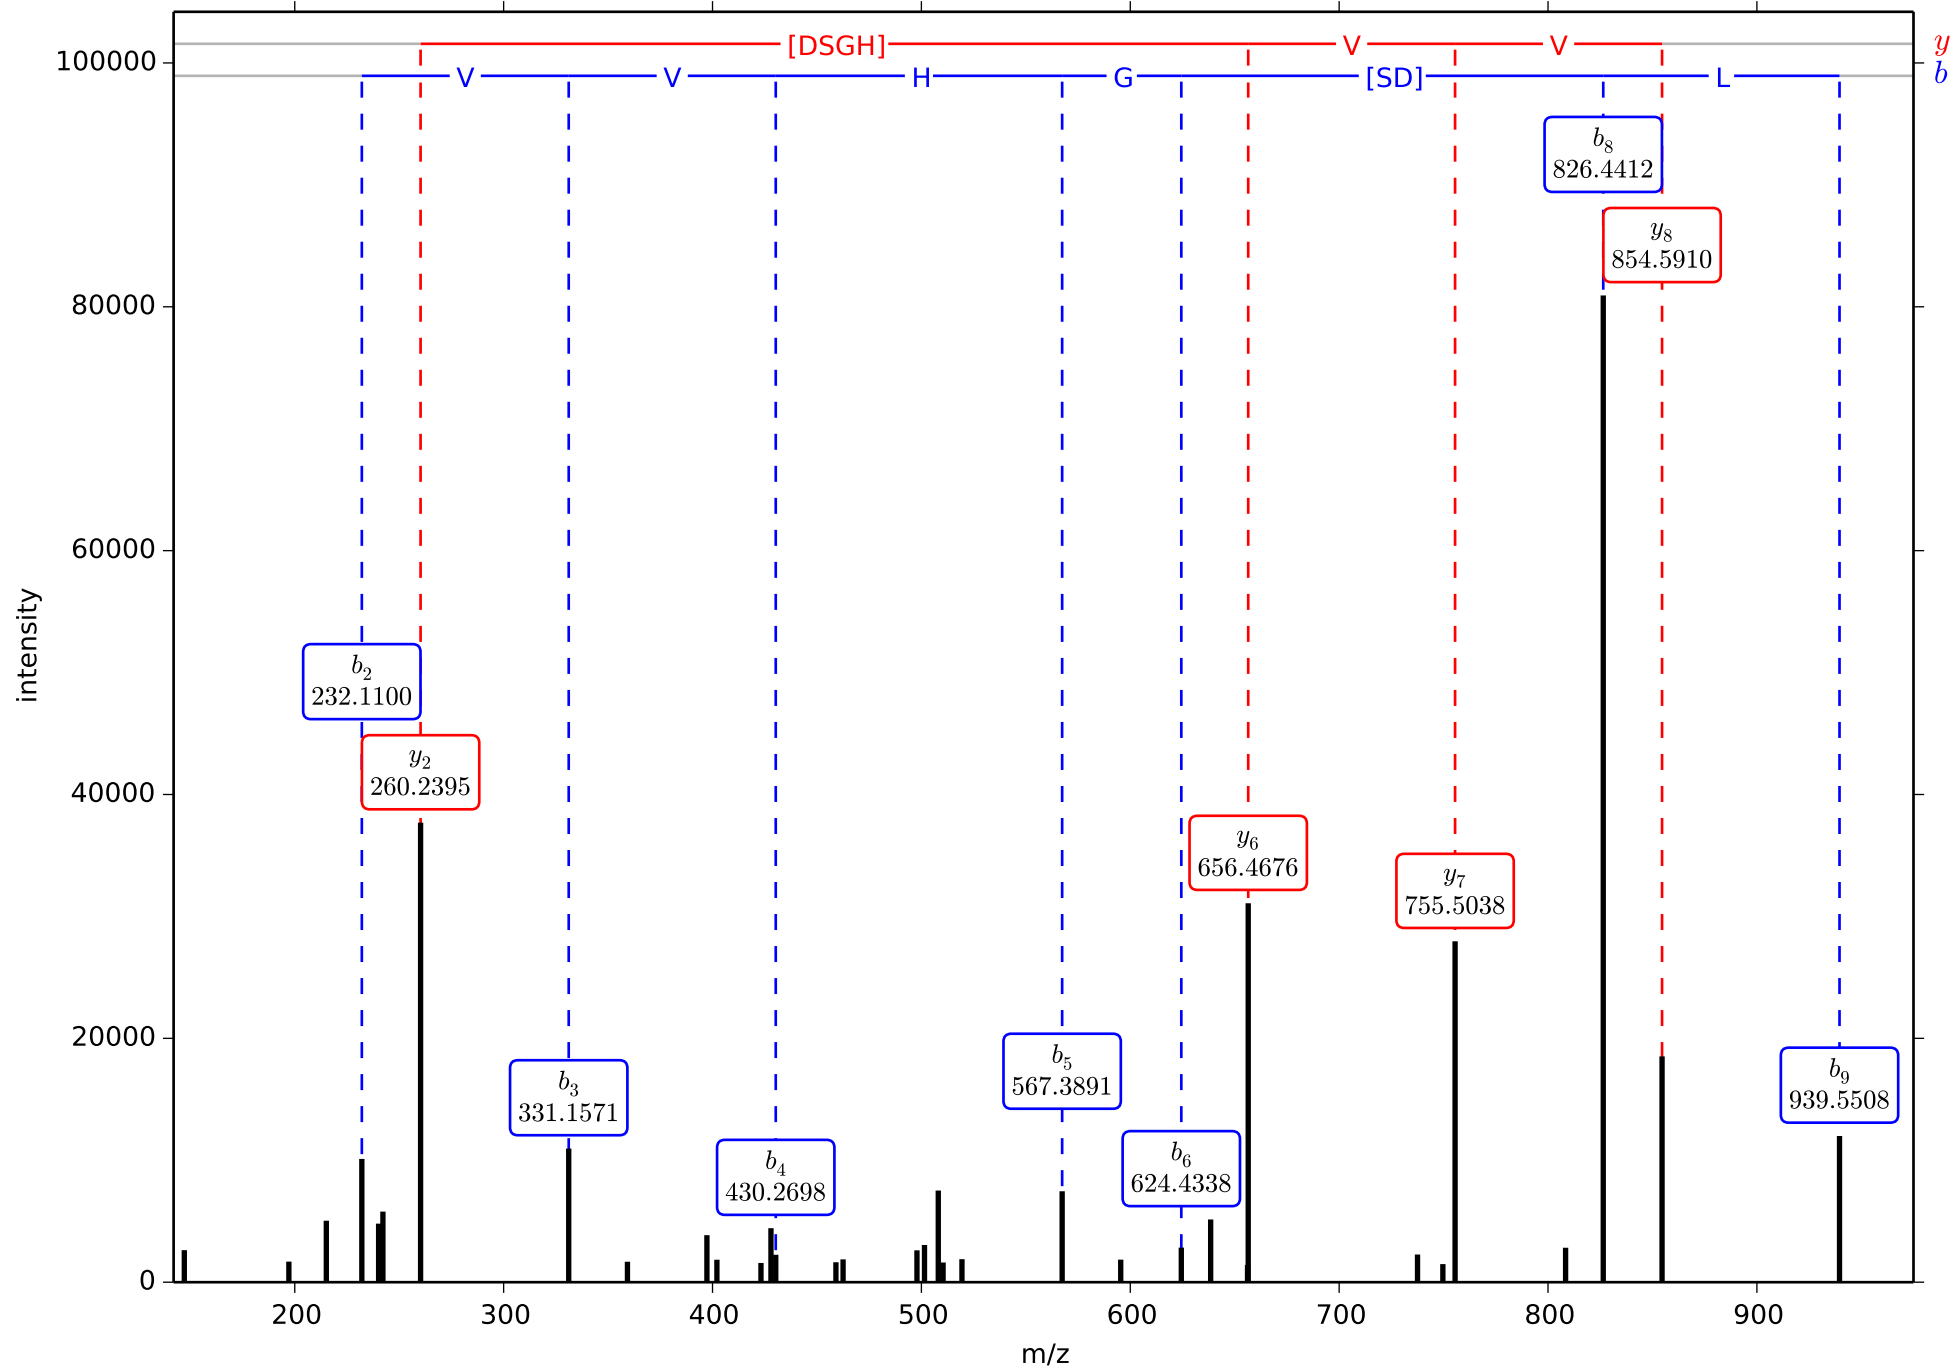

P16330 : AHVTLGCAADVQPVPQTGLDLLDILQQVK

parent: 751.409630,4+

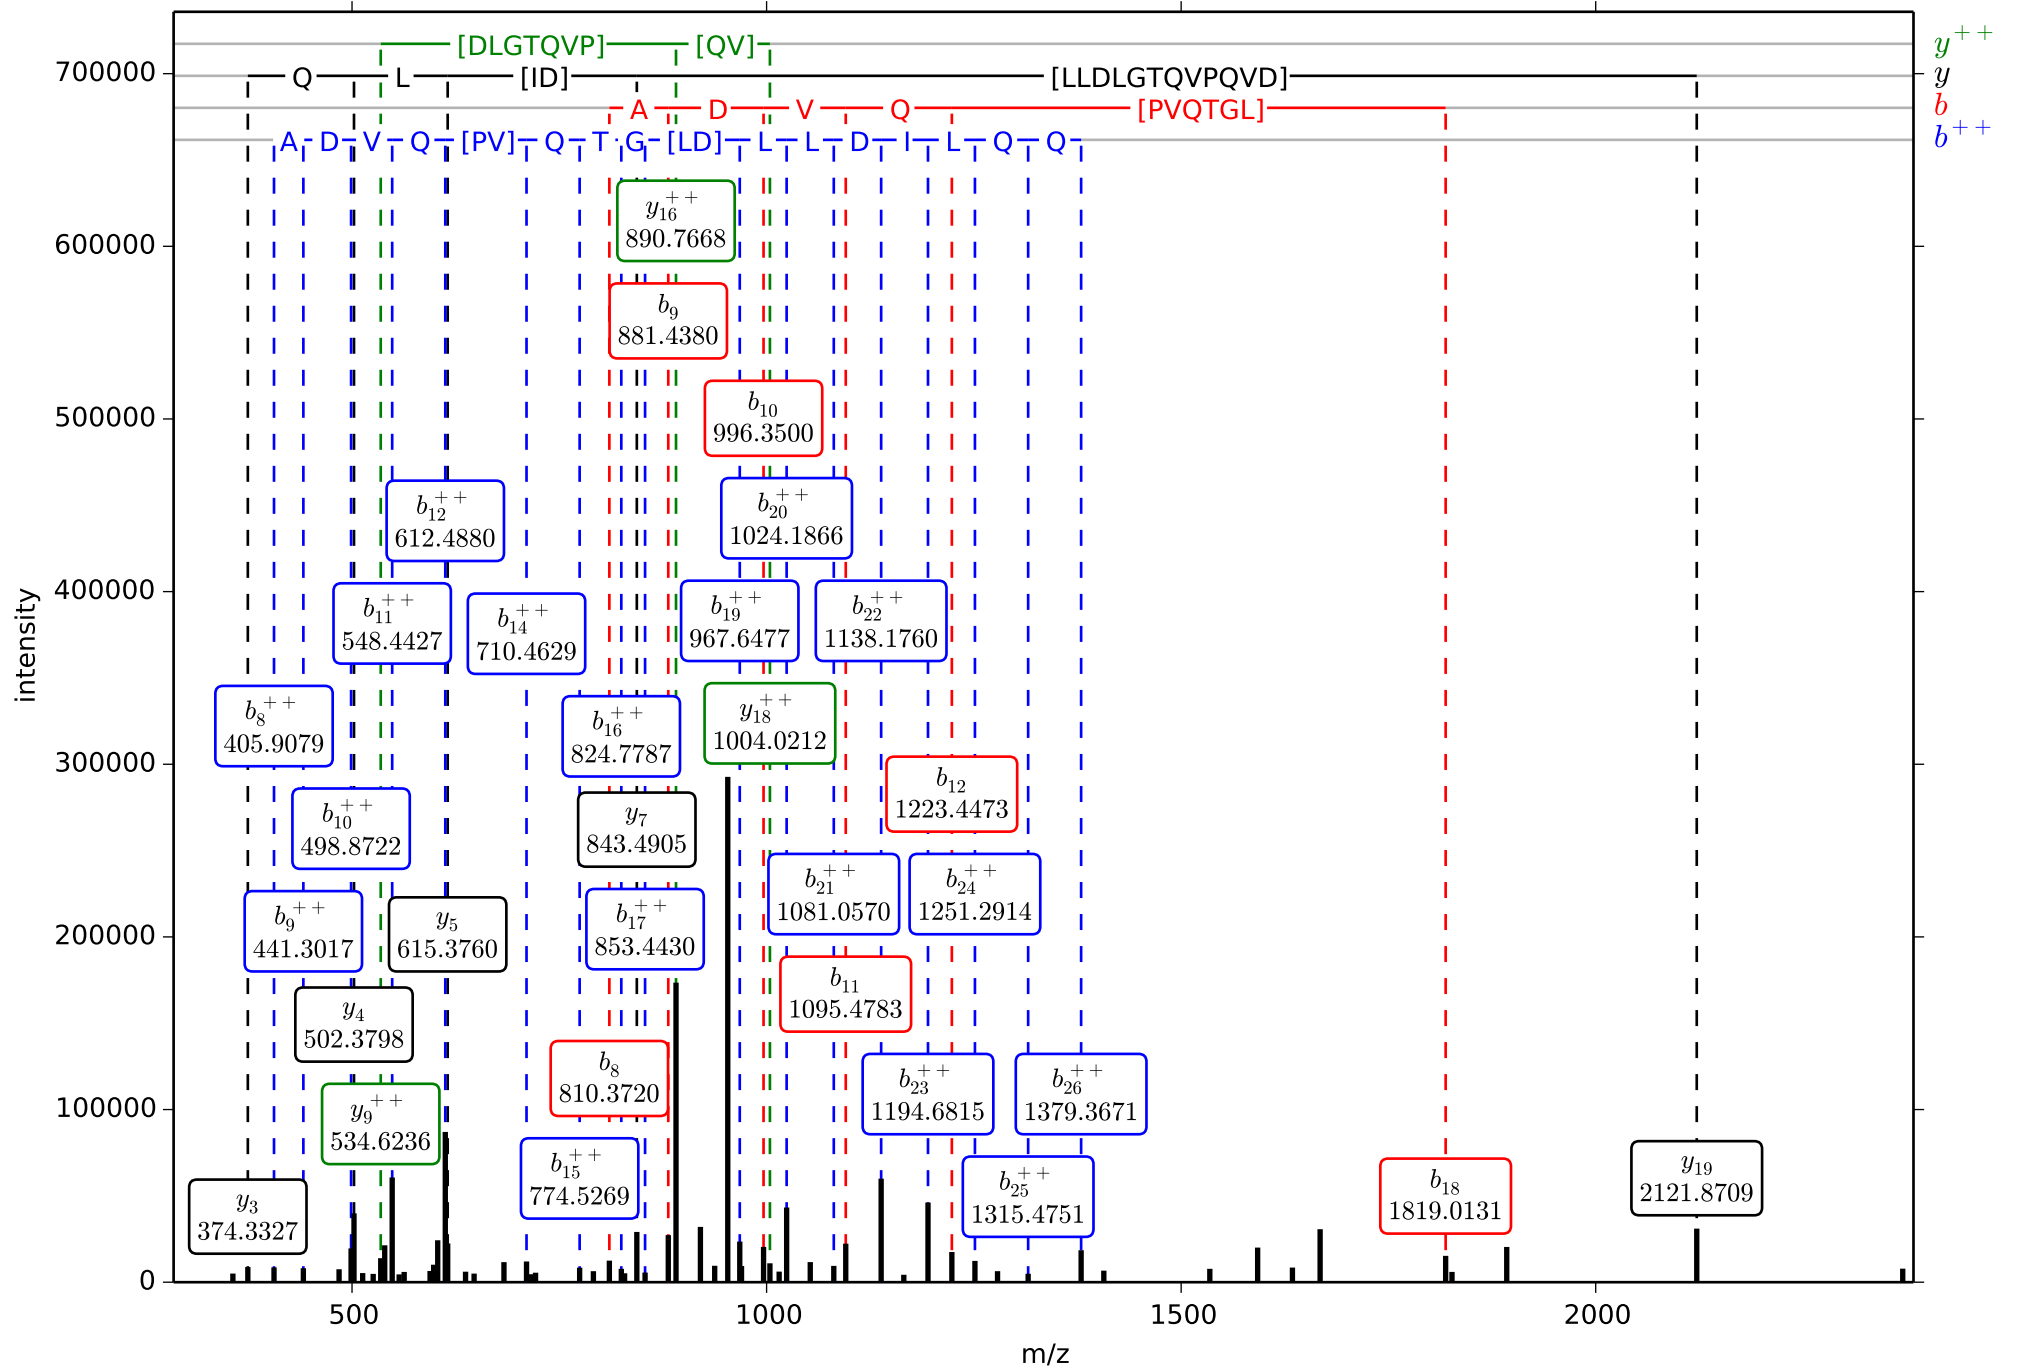

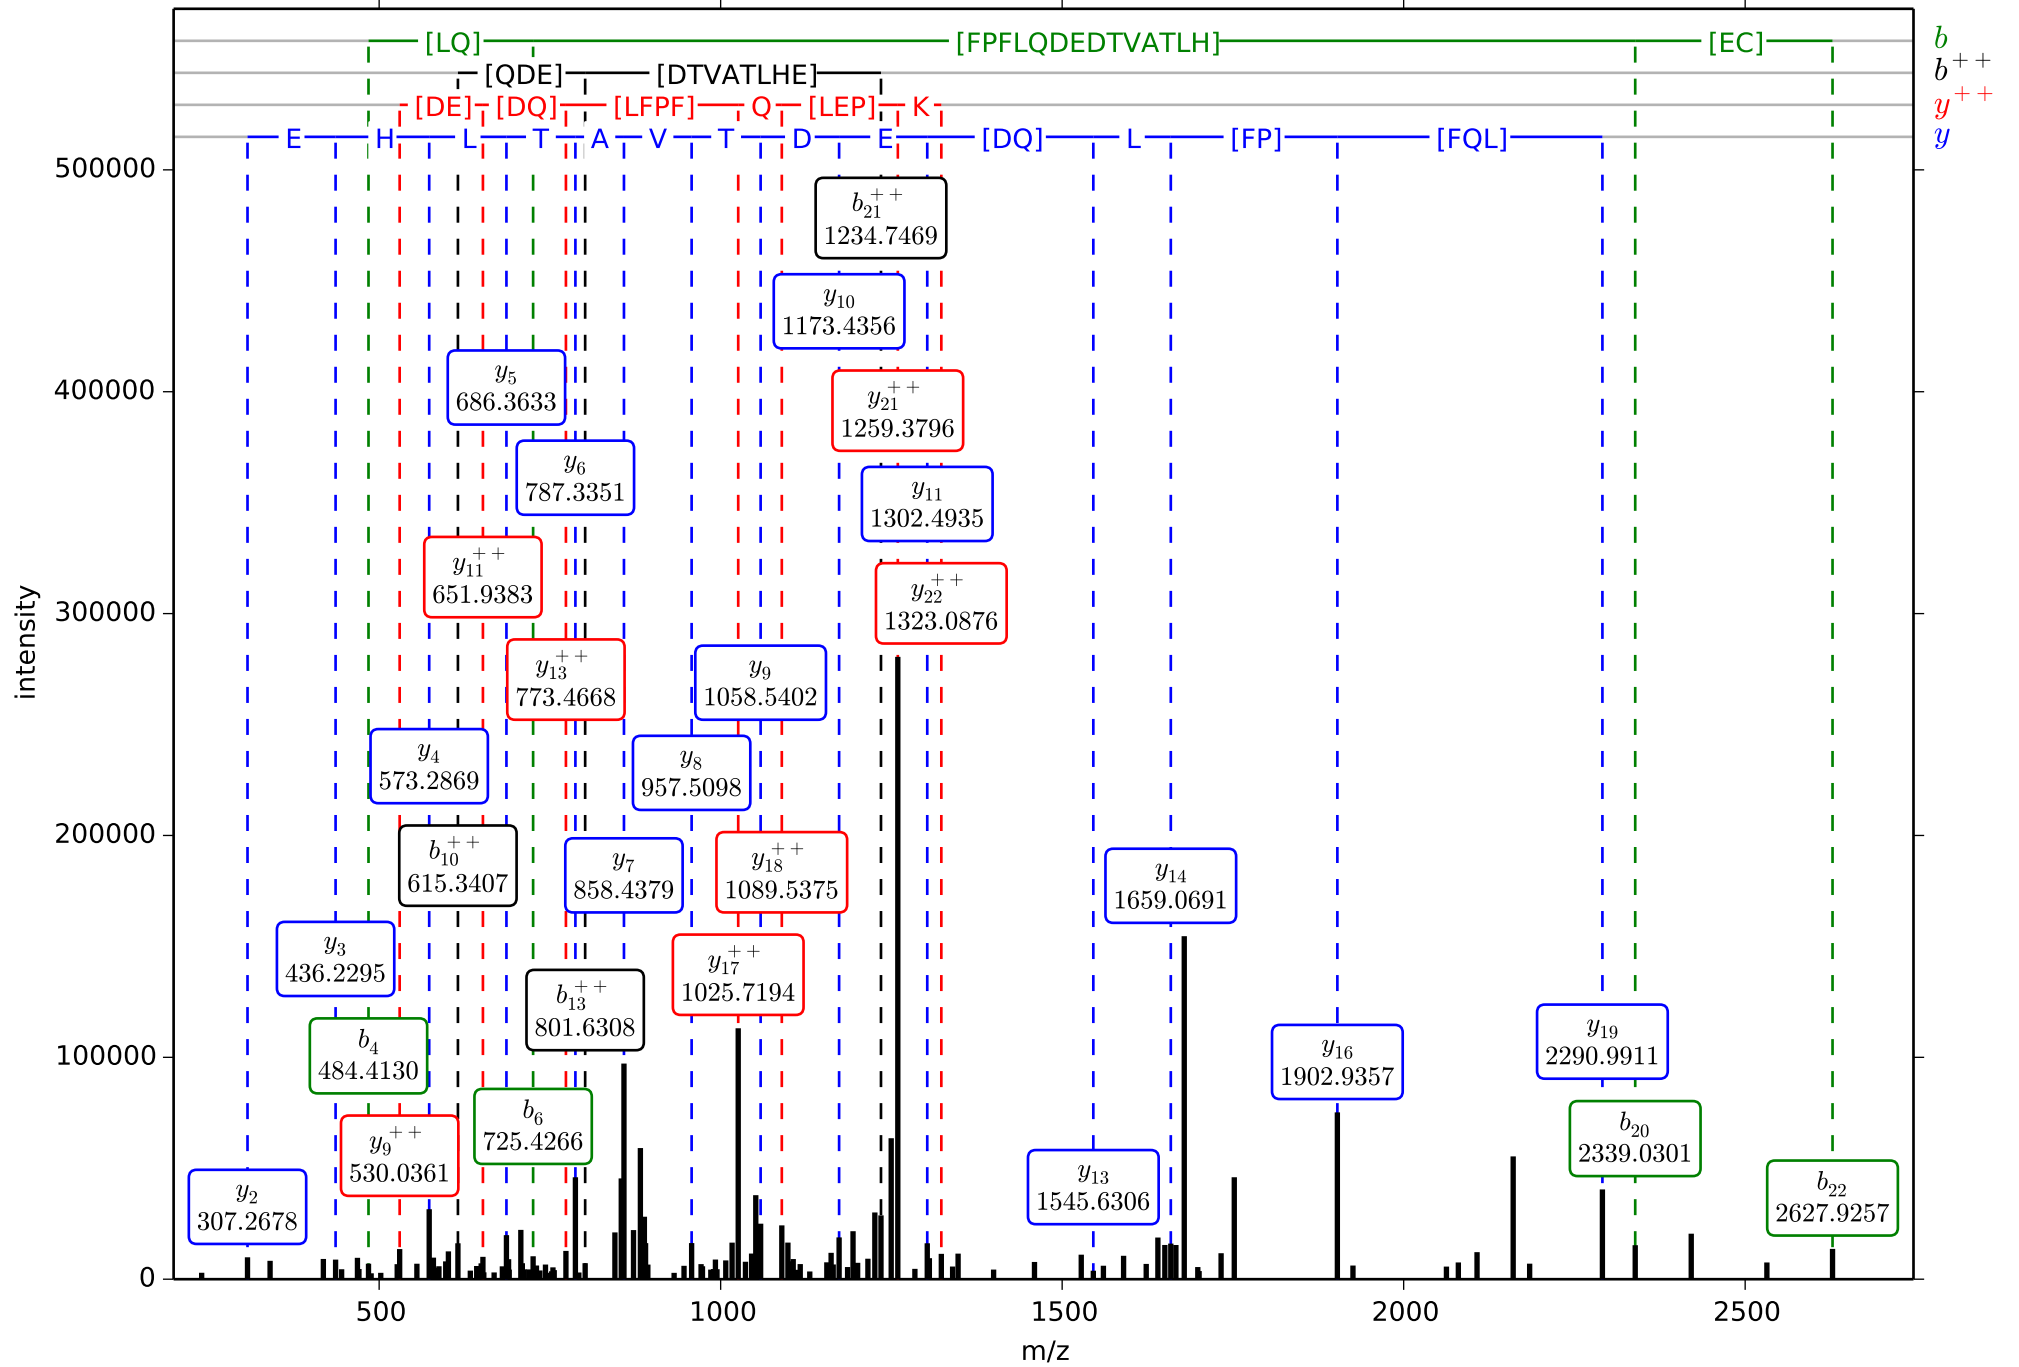



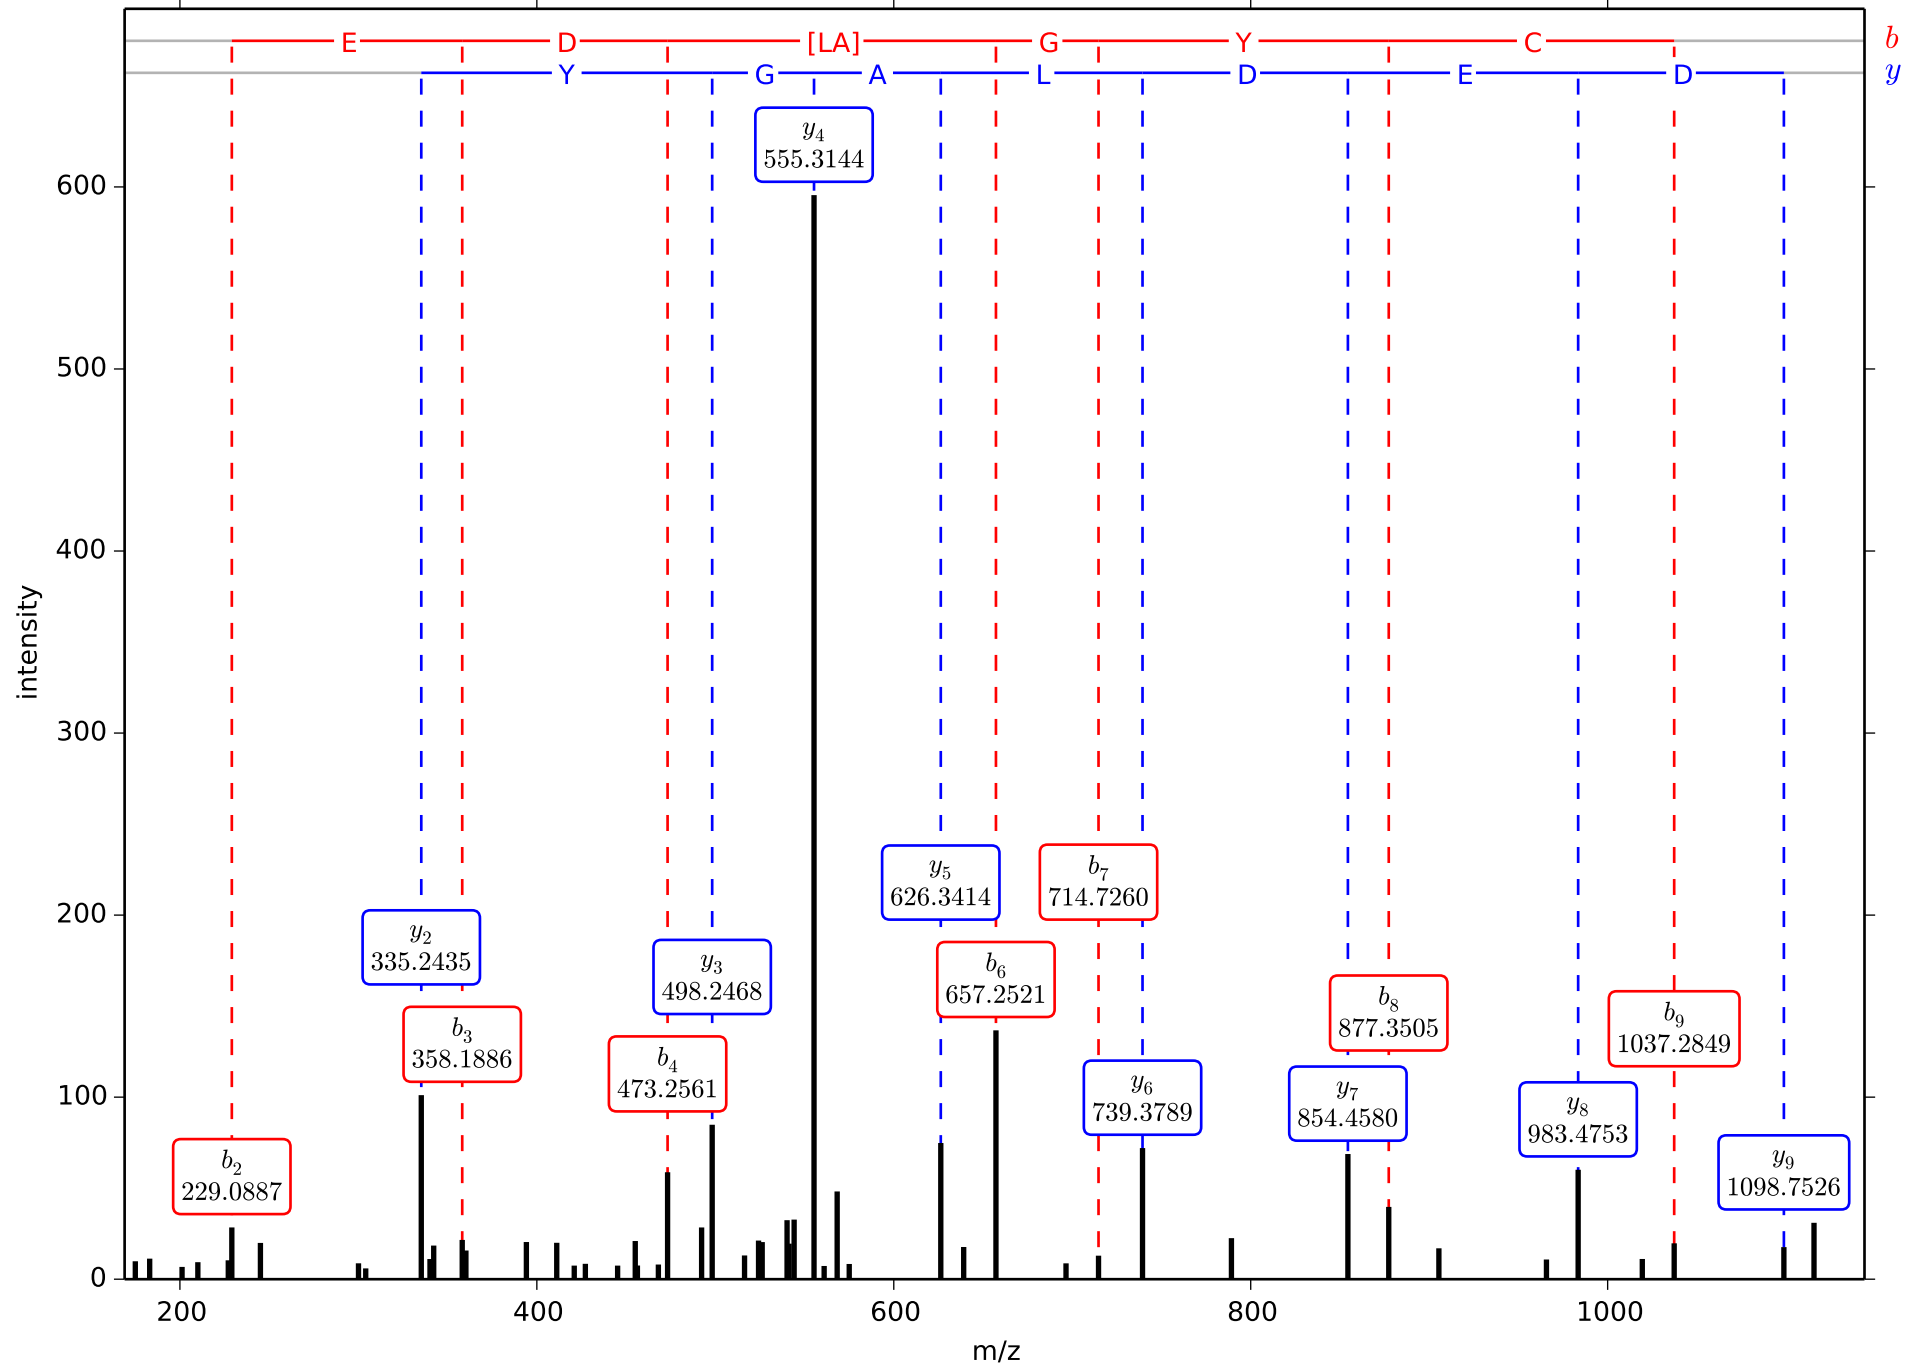

P16330 : LDCAQLK

parent: 424.219920,2+

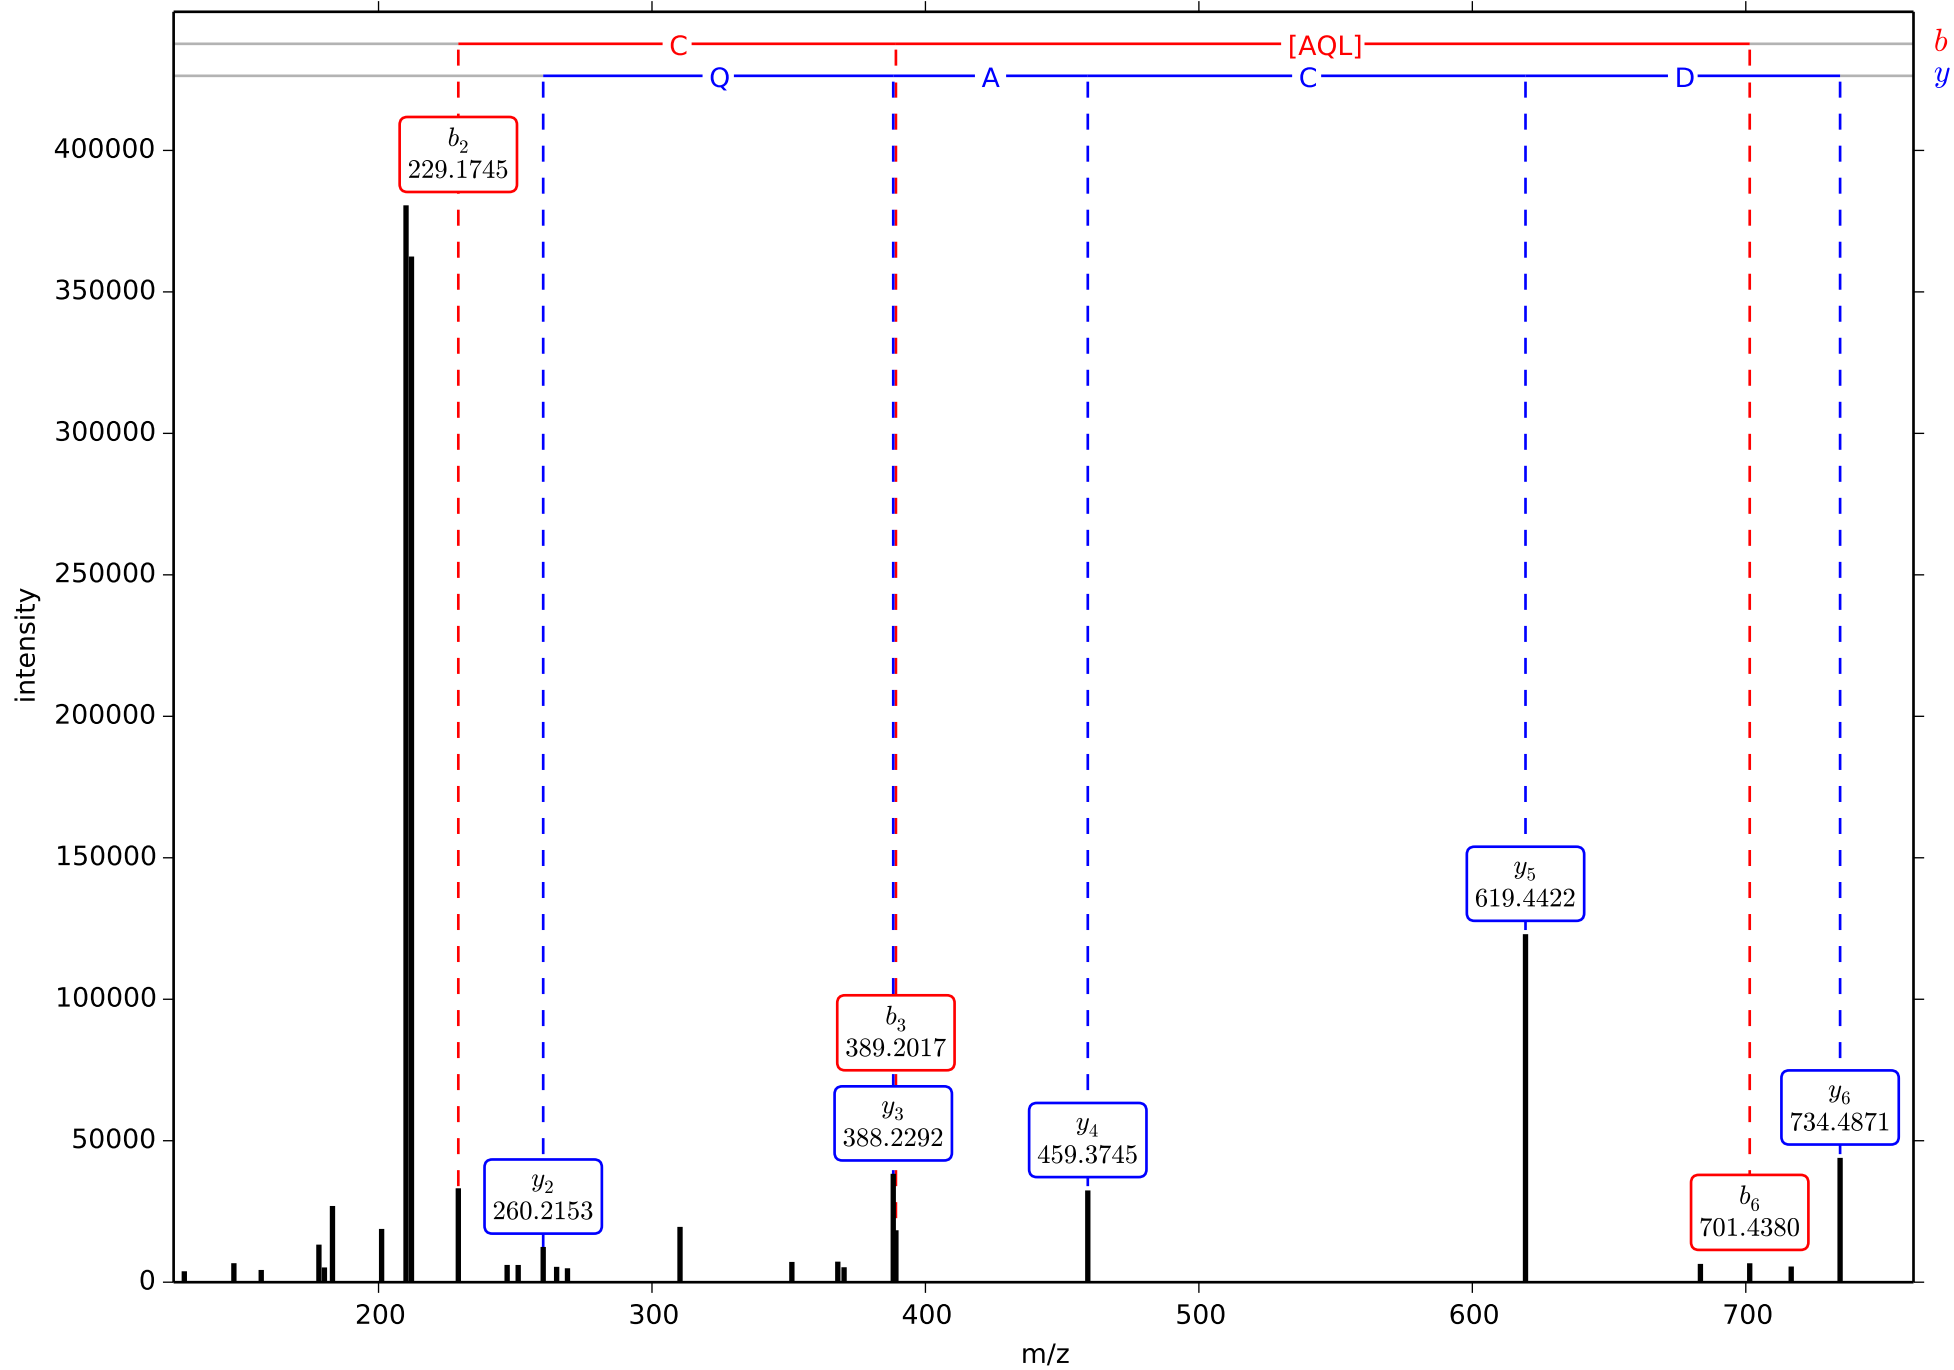

Q91YT0 : GAGAYICGEETALIESIEGK

parent: 1034.511500,2+

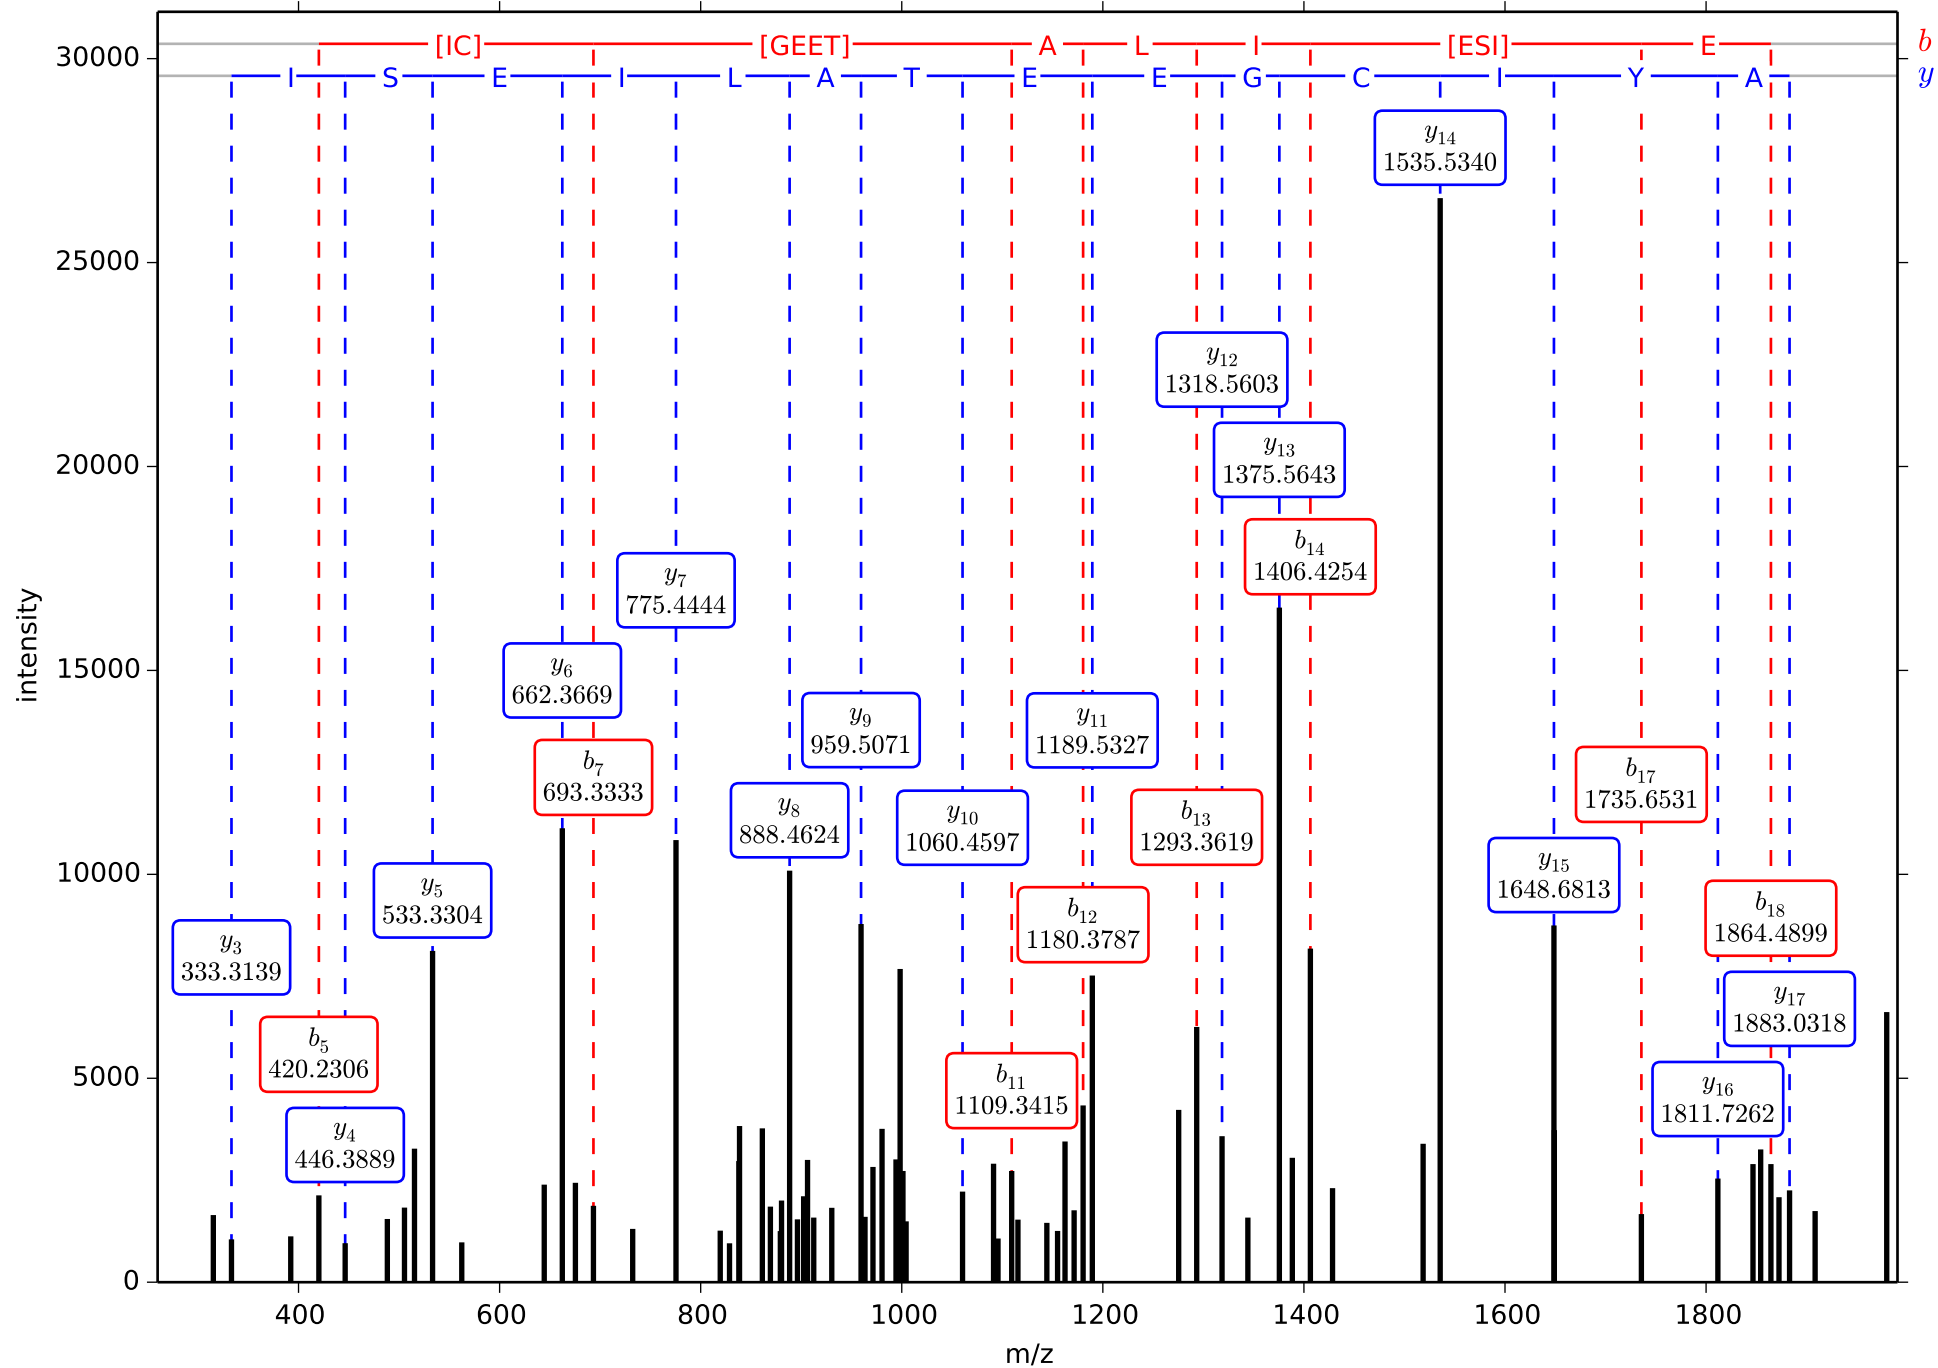

Q91YT0 : NACGSDYDFDFVVR

parent: 882.393400,2+

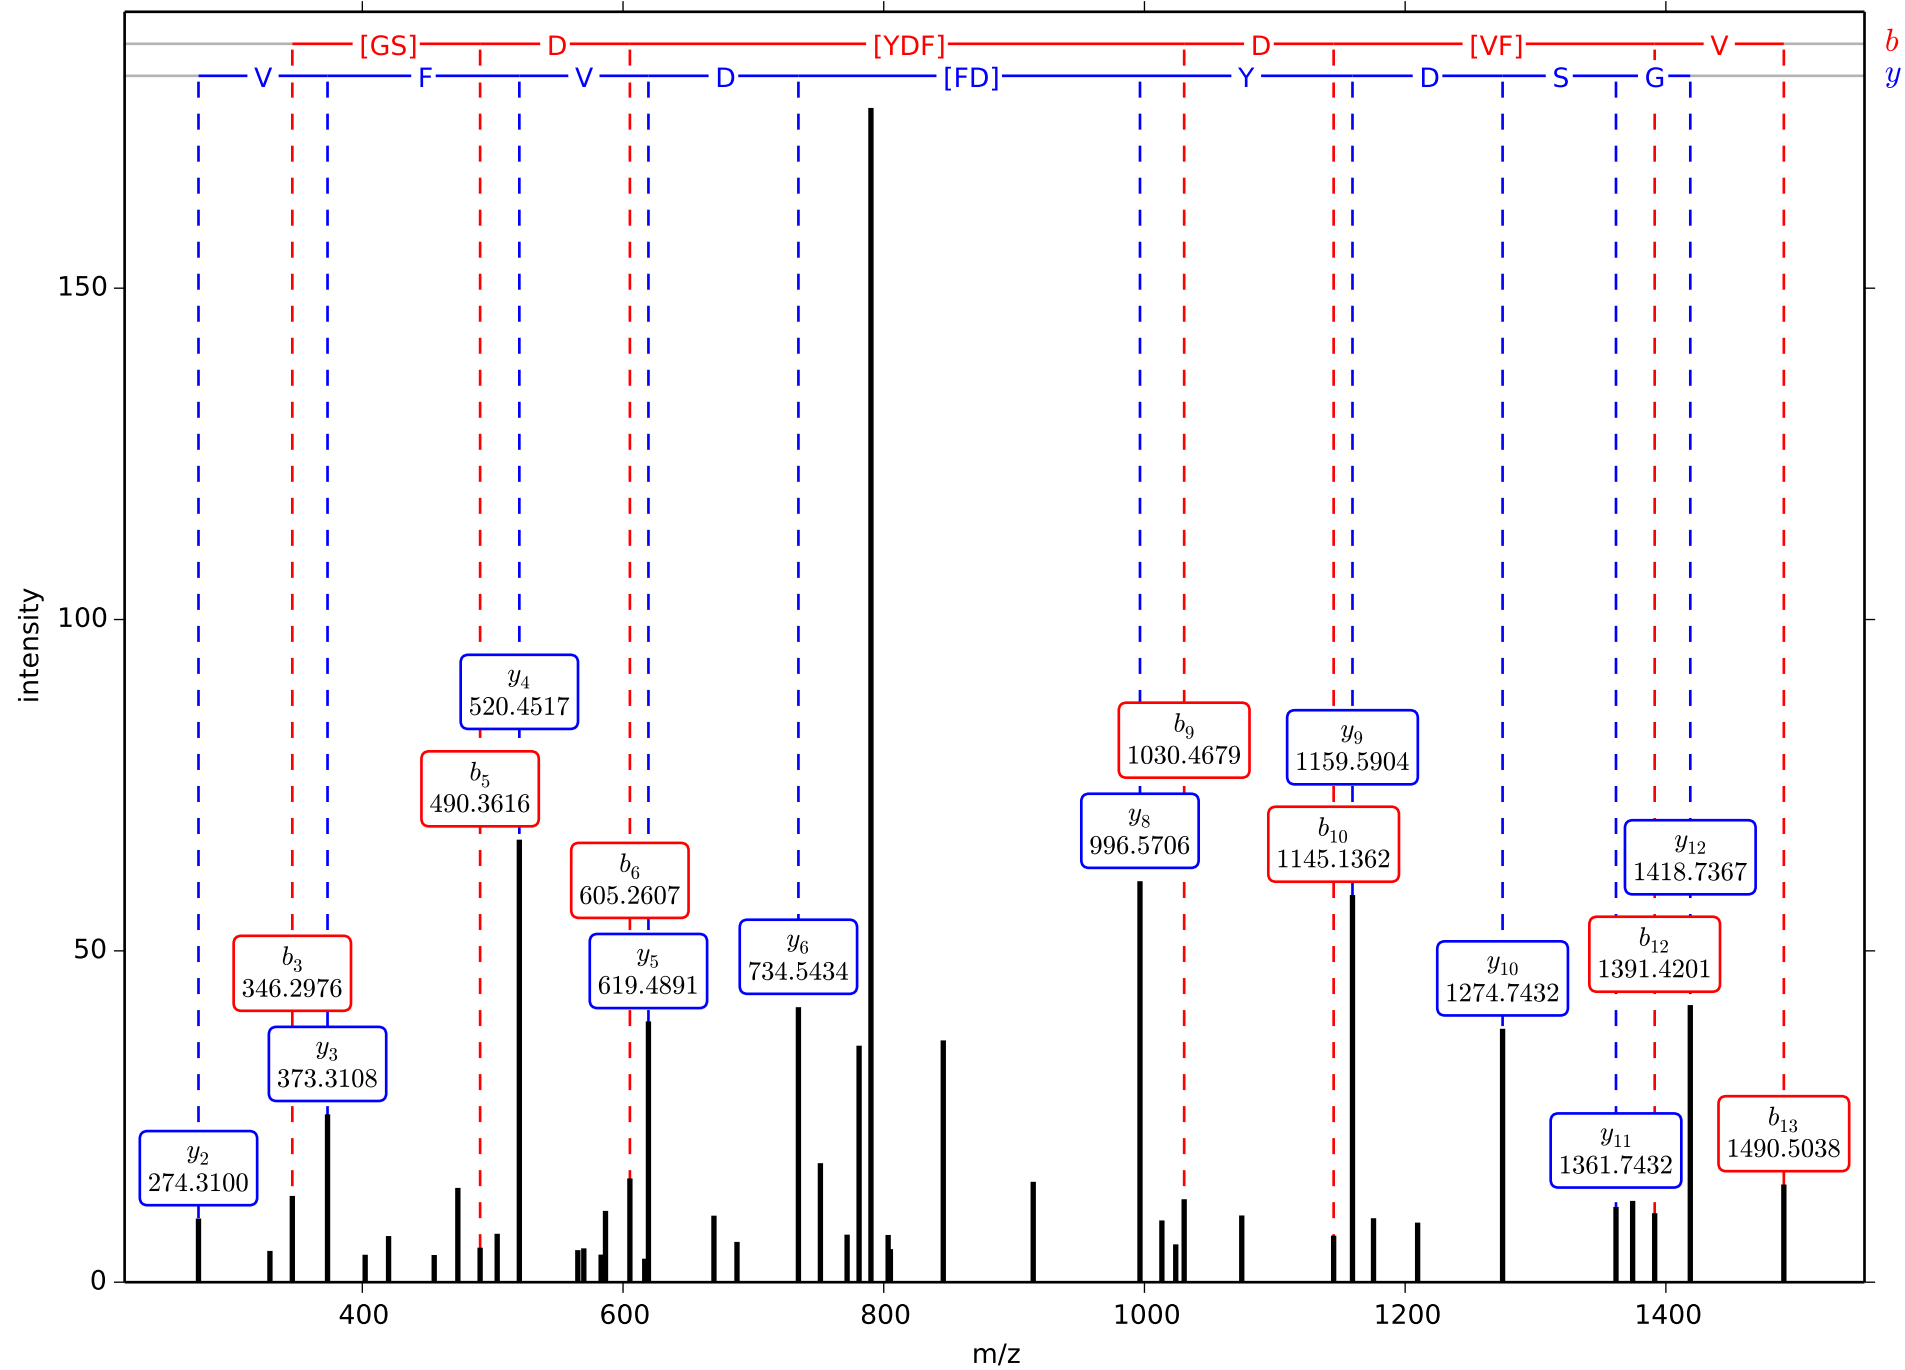

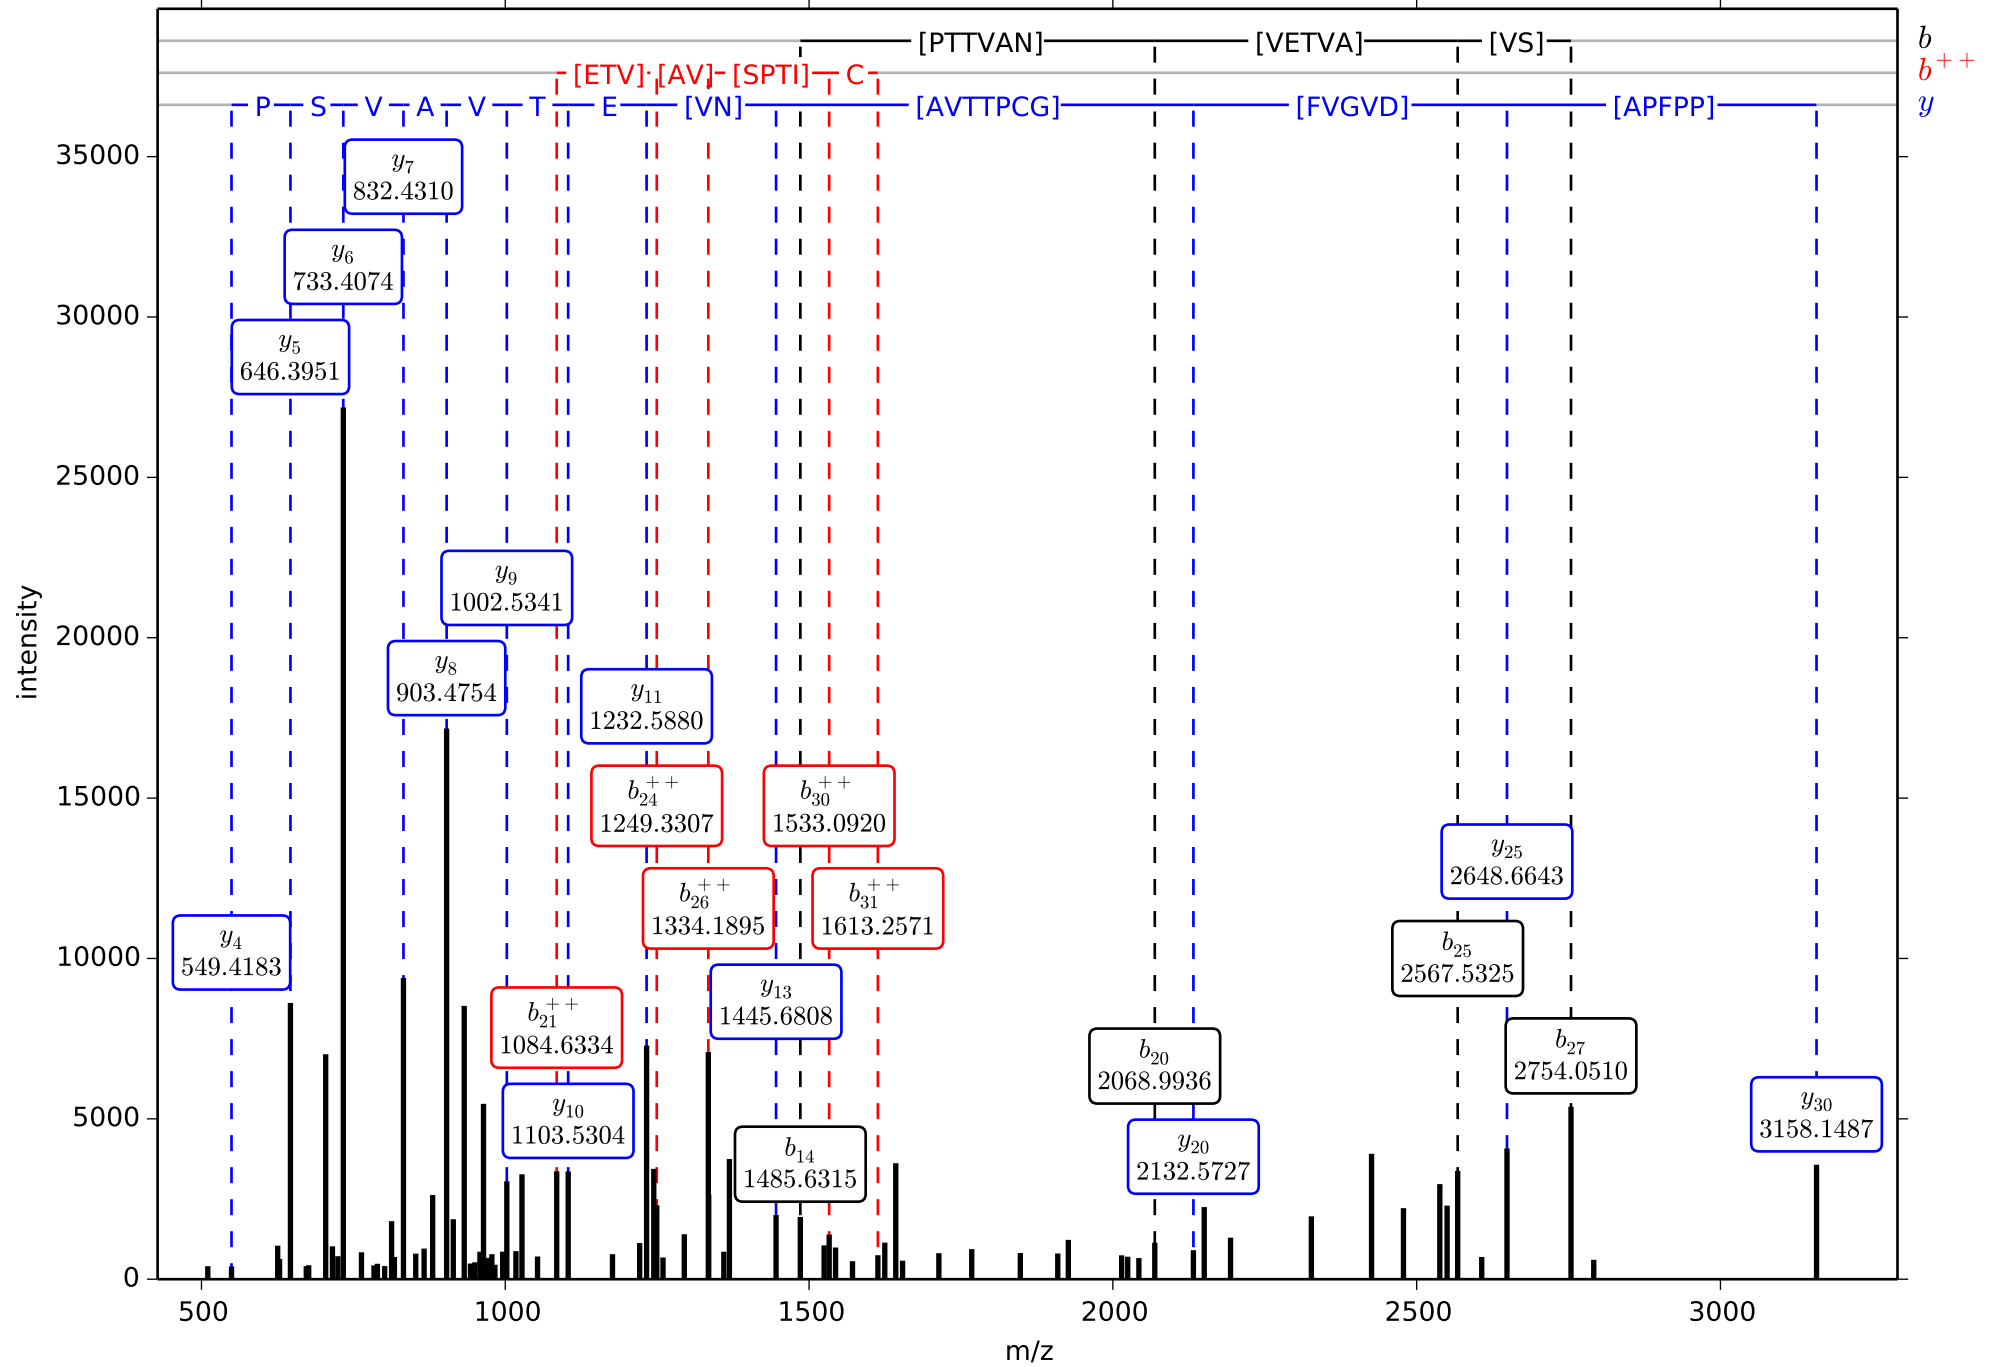

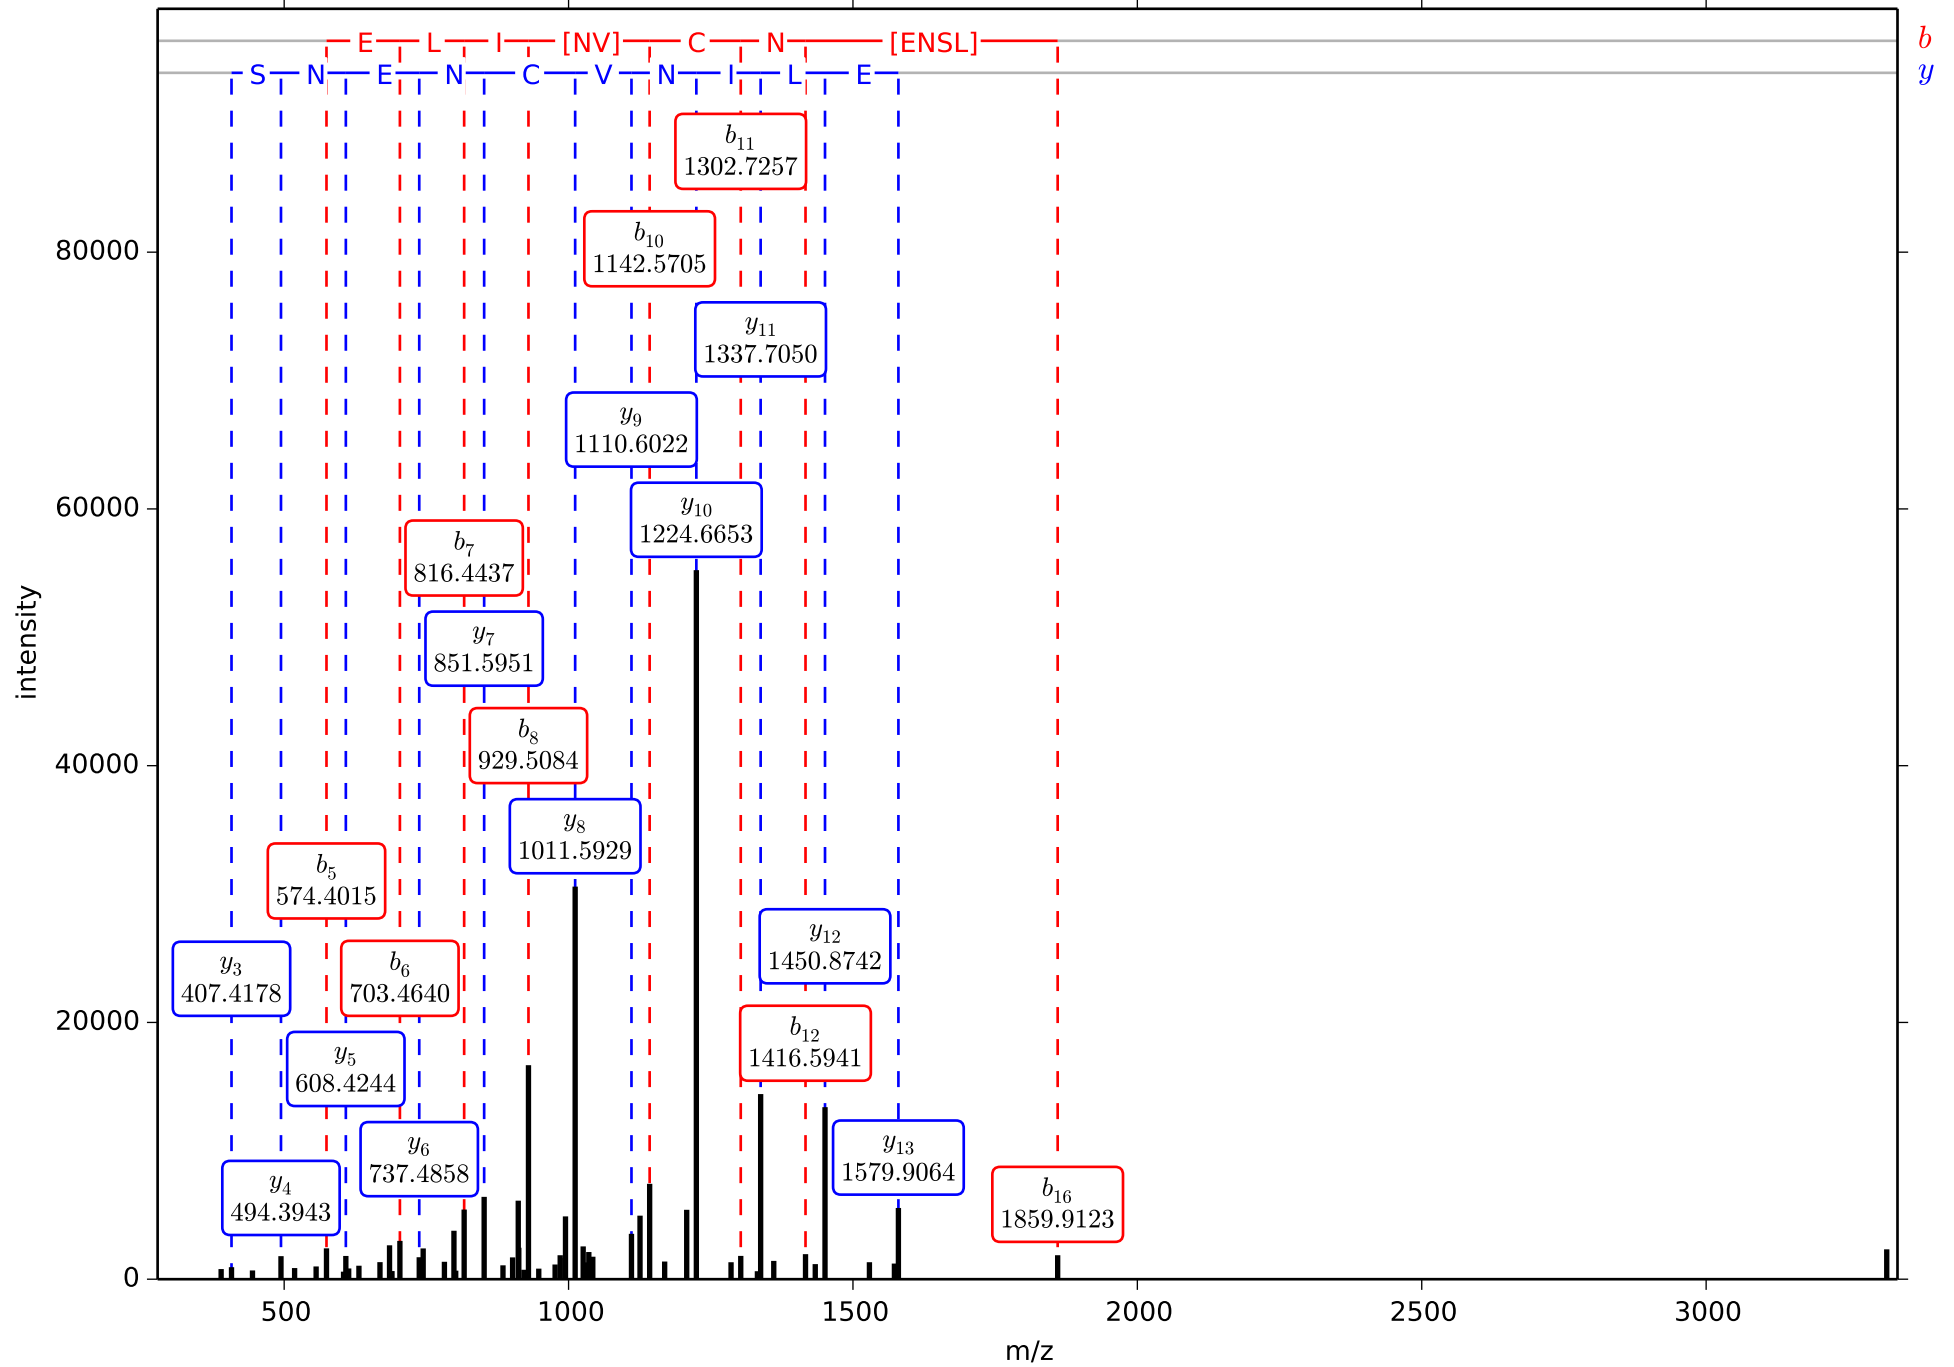

Q68FD5 : VIQCFAETGQVQK

parent: 754.385390,2+

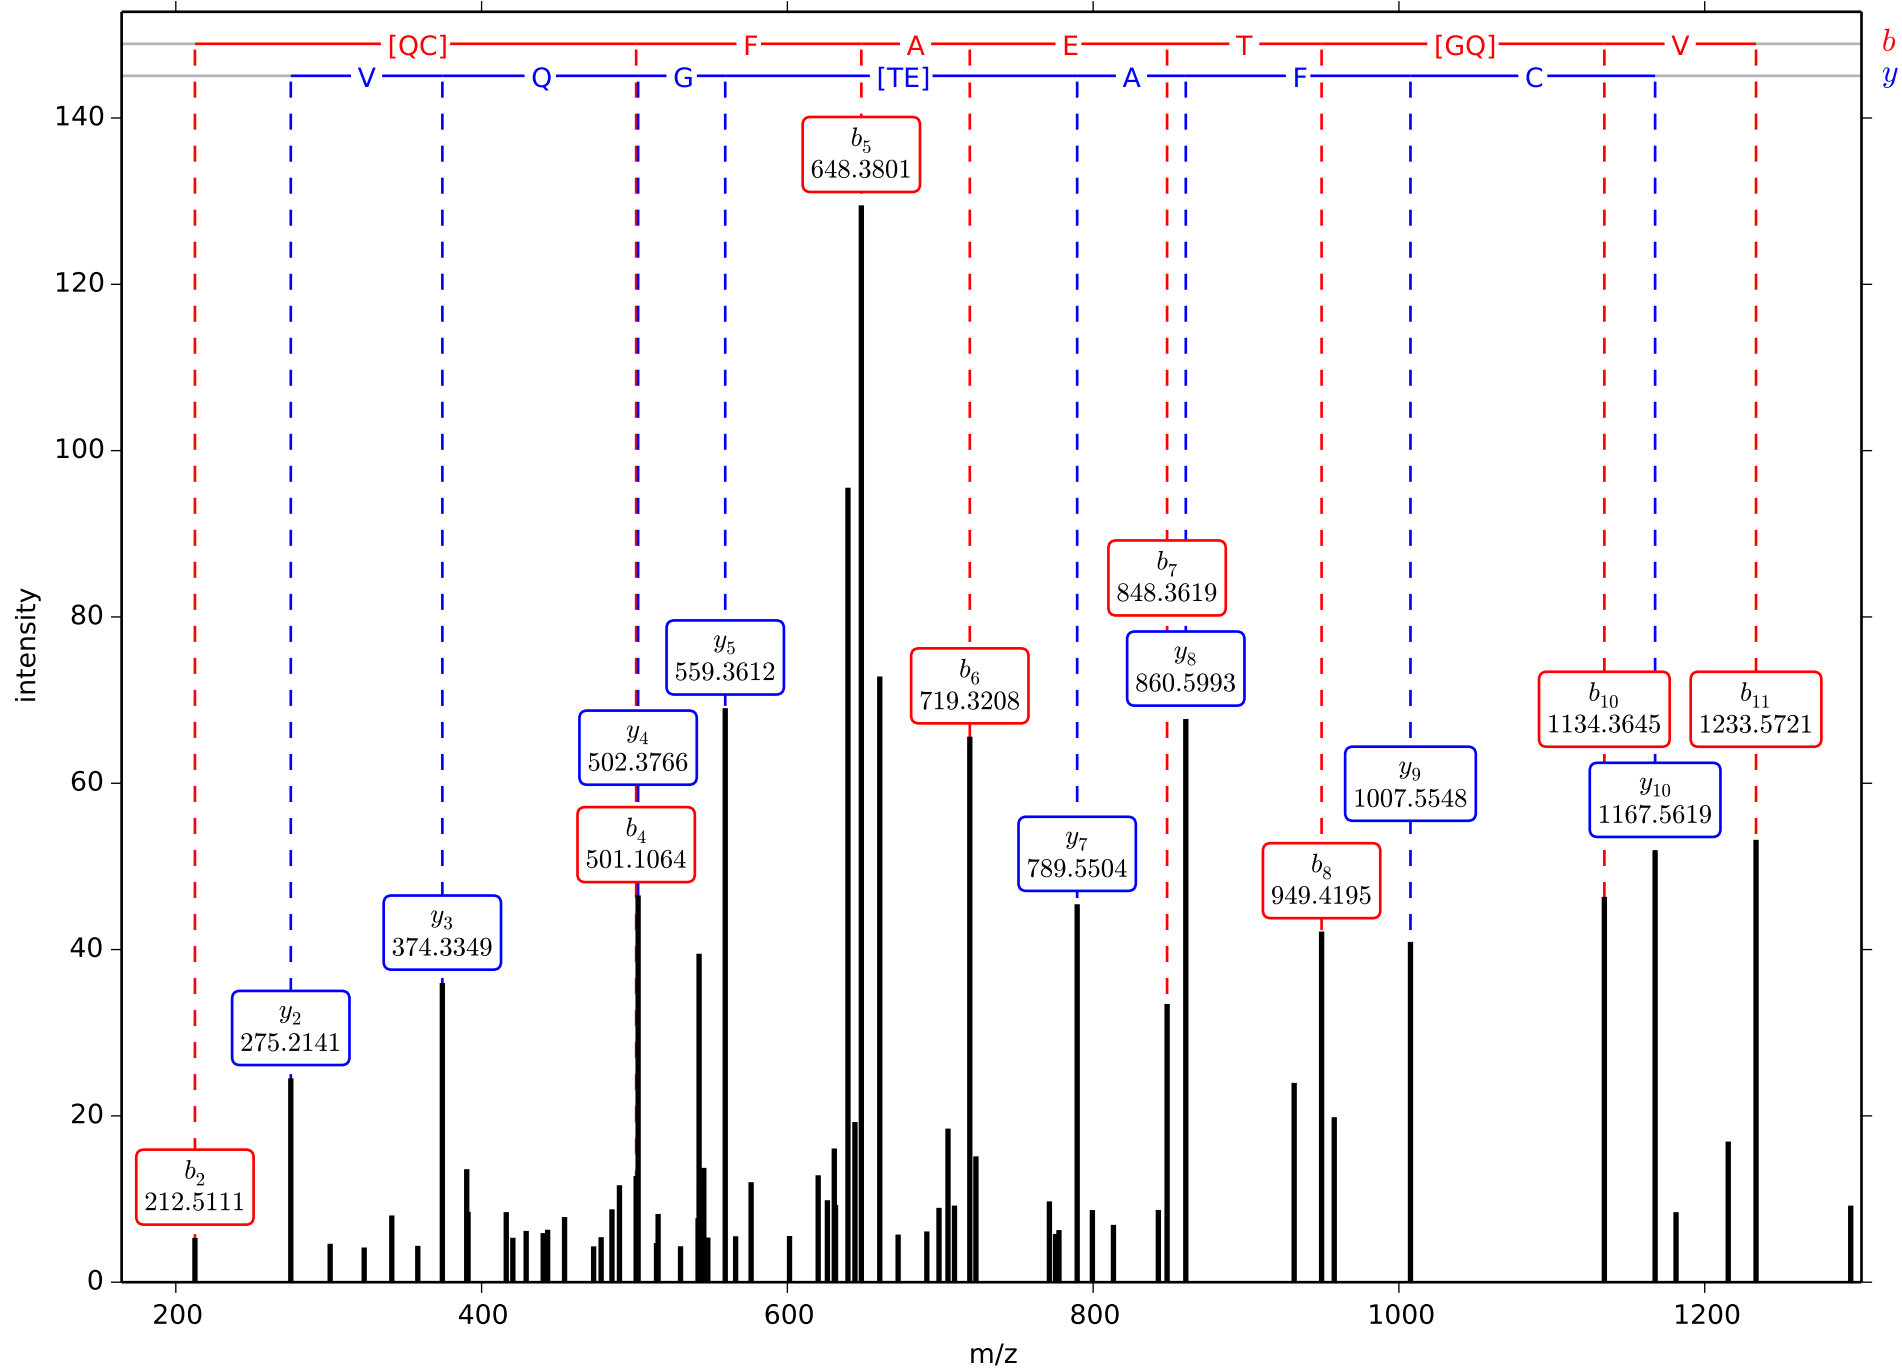

Q68FD5 : CNEPAVWSQLAK

parent: 701.842670,2+

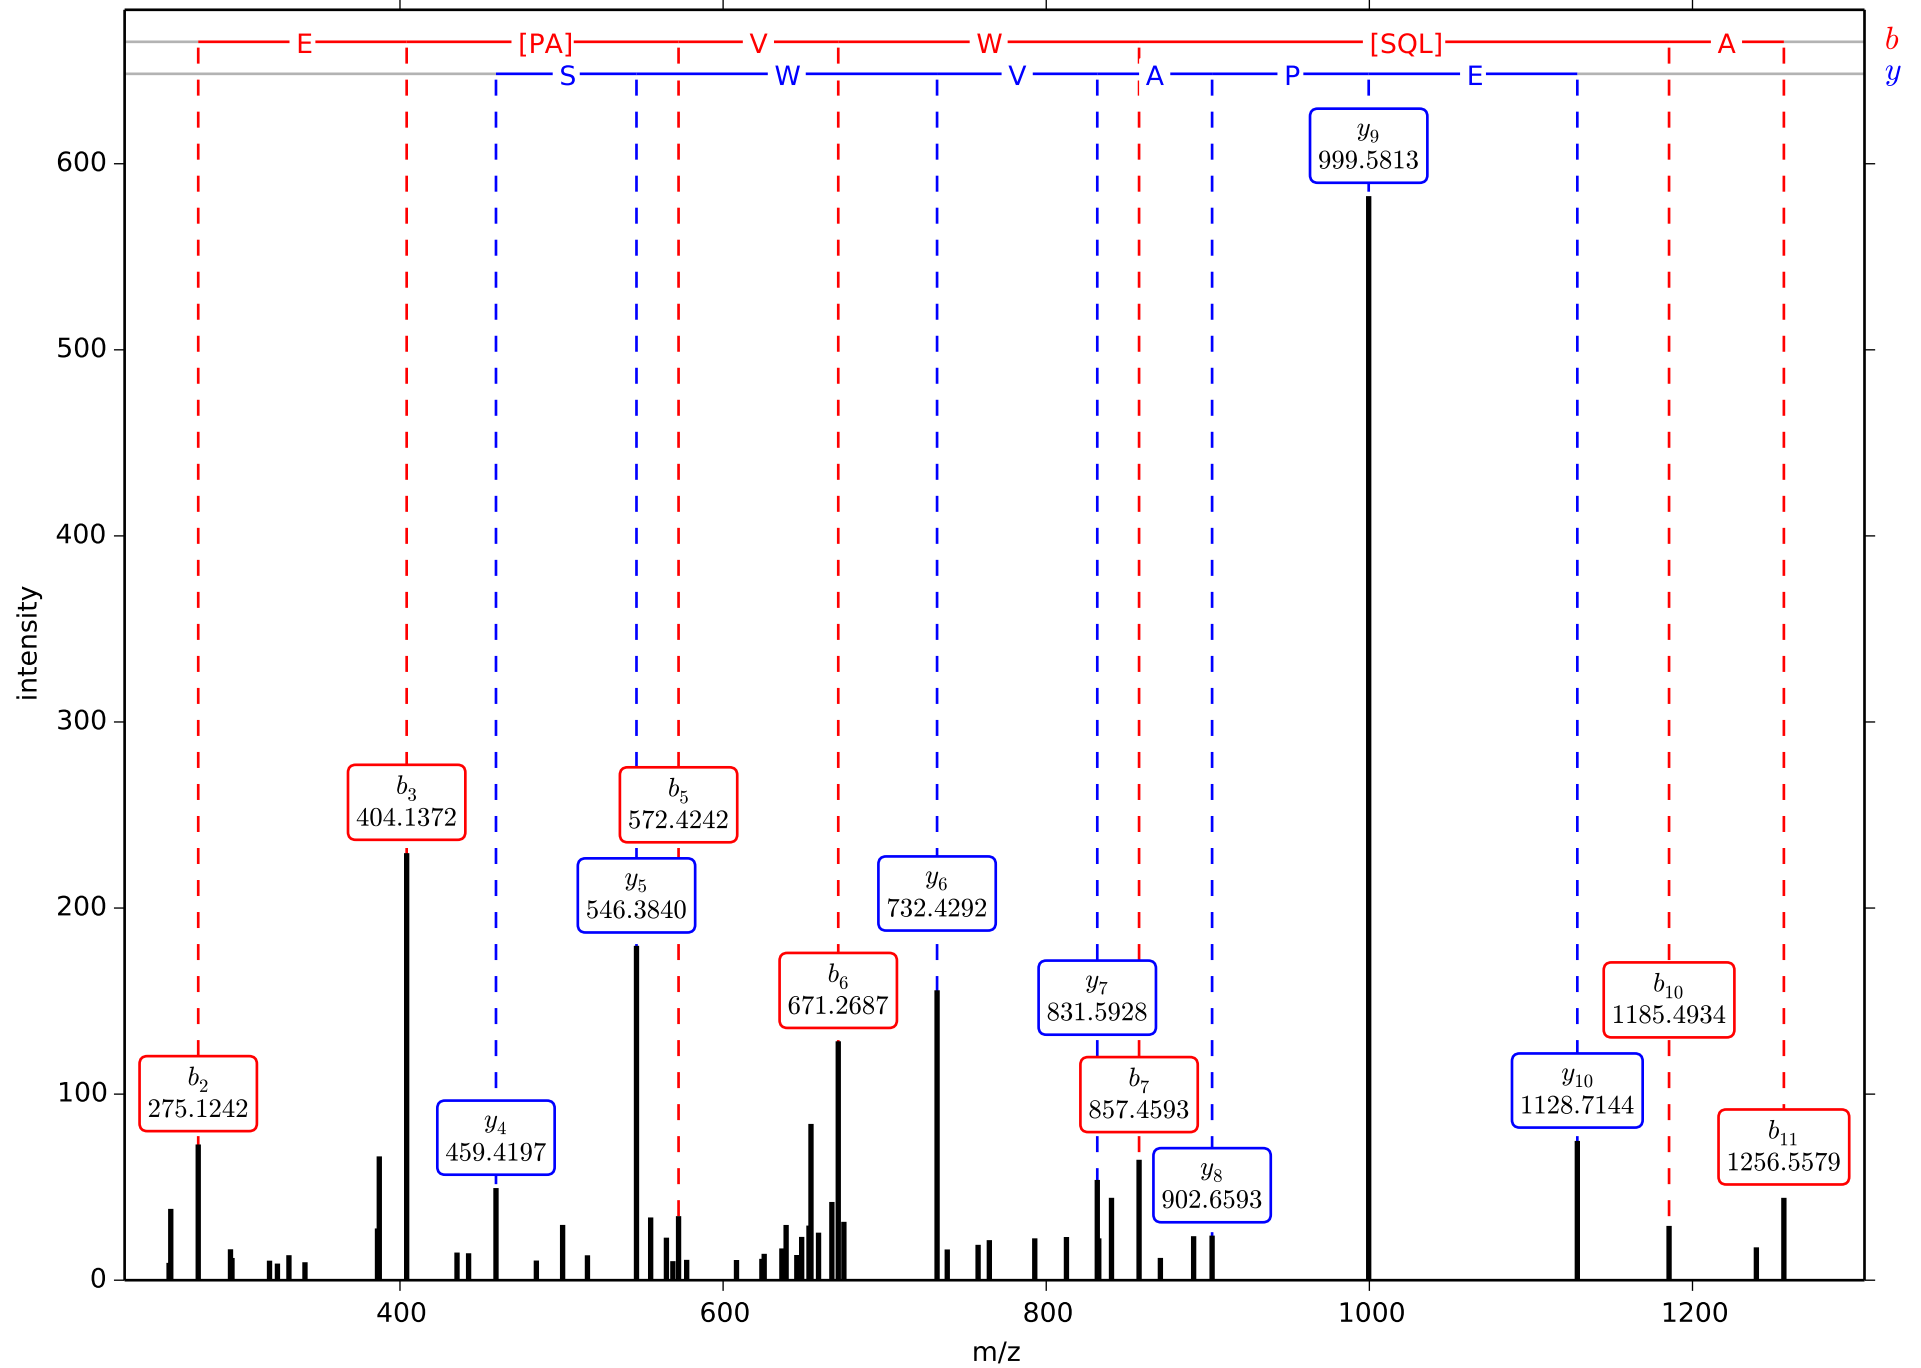



Q68FD5 : HSSLAGCQIINYR

parent: 759.874730,2+

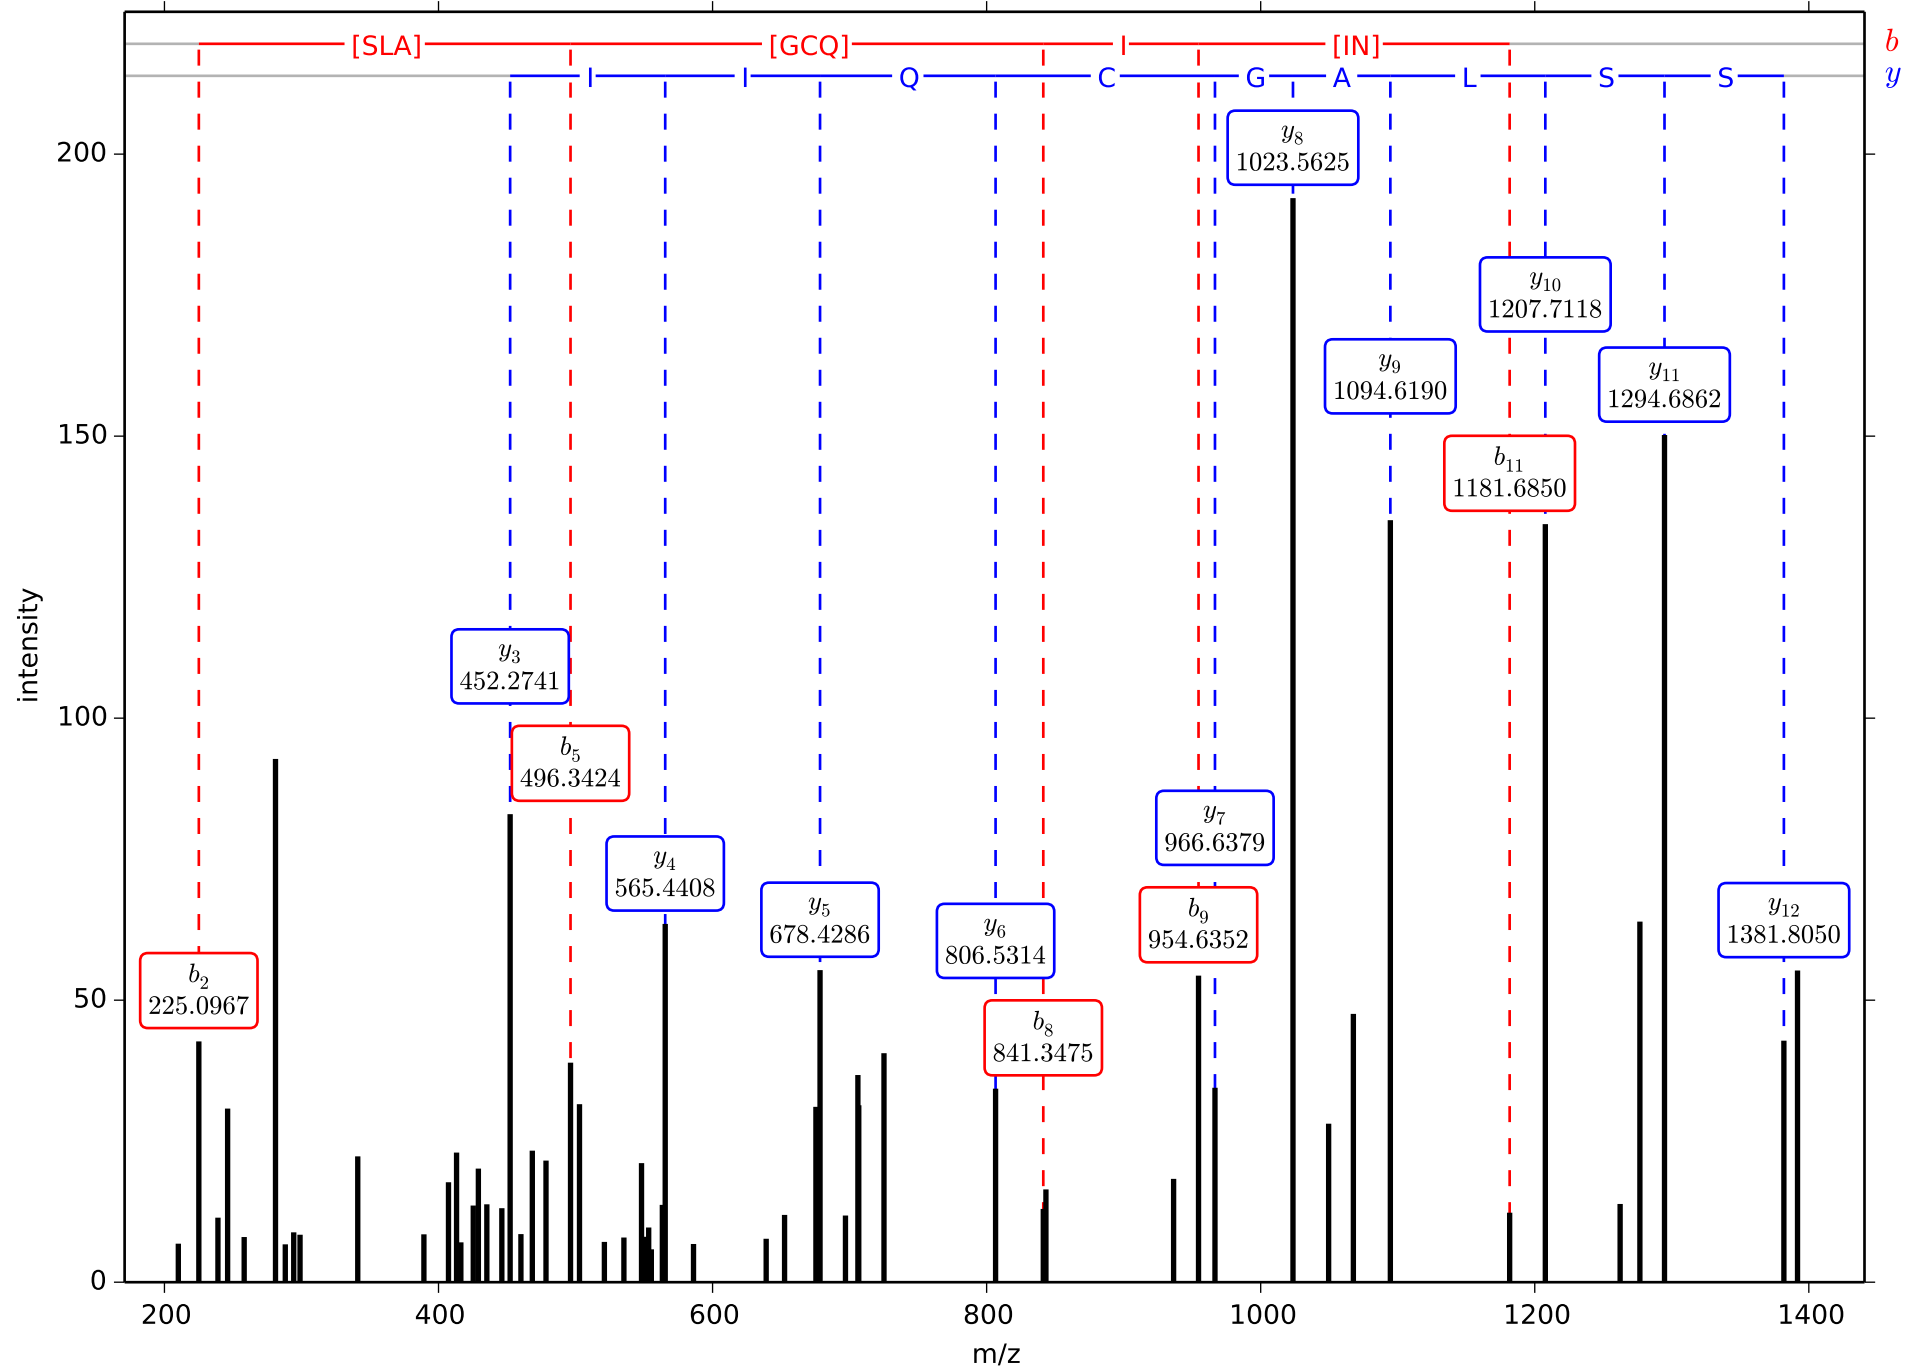

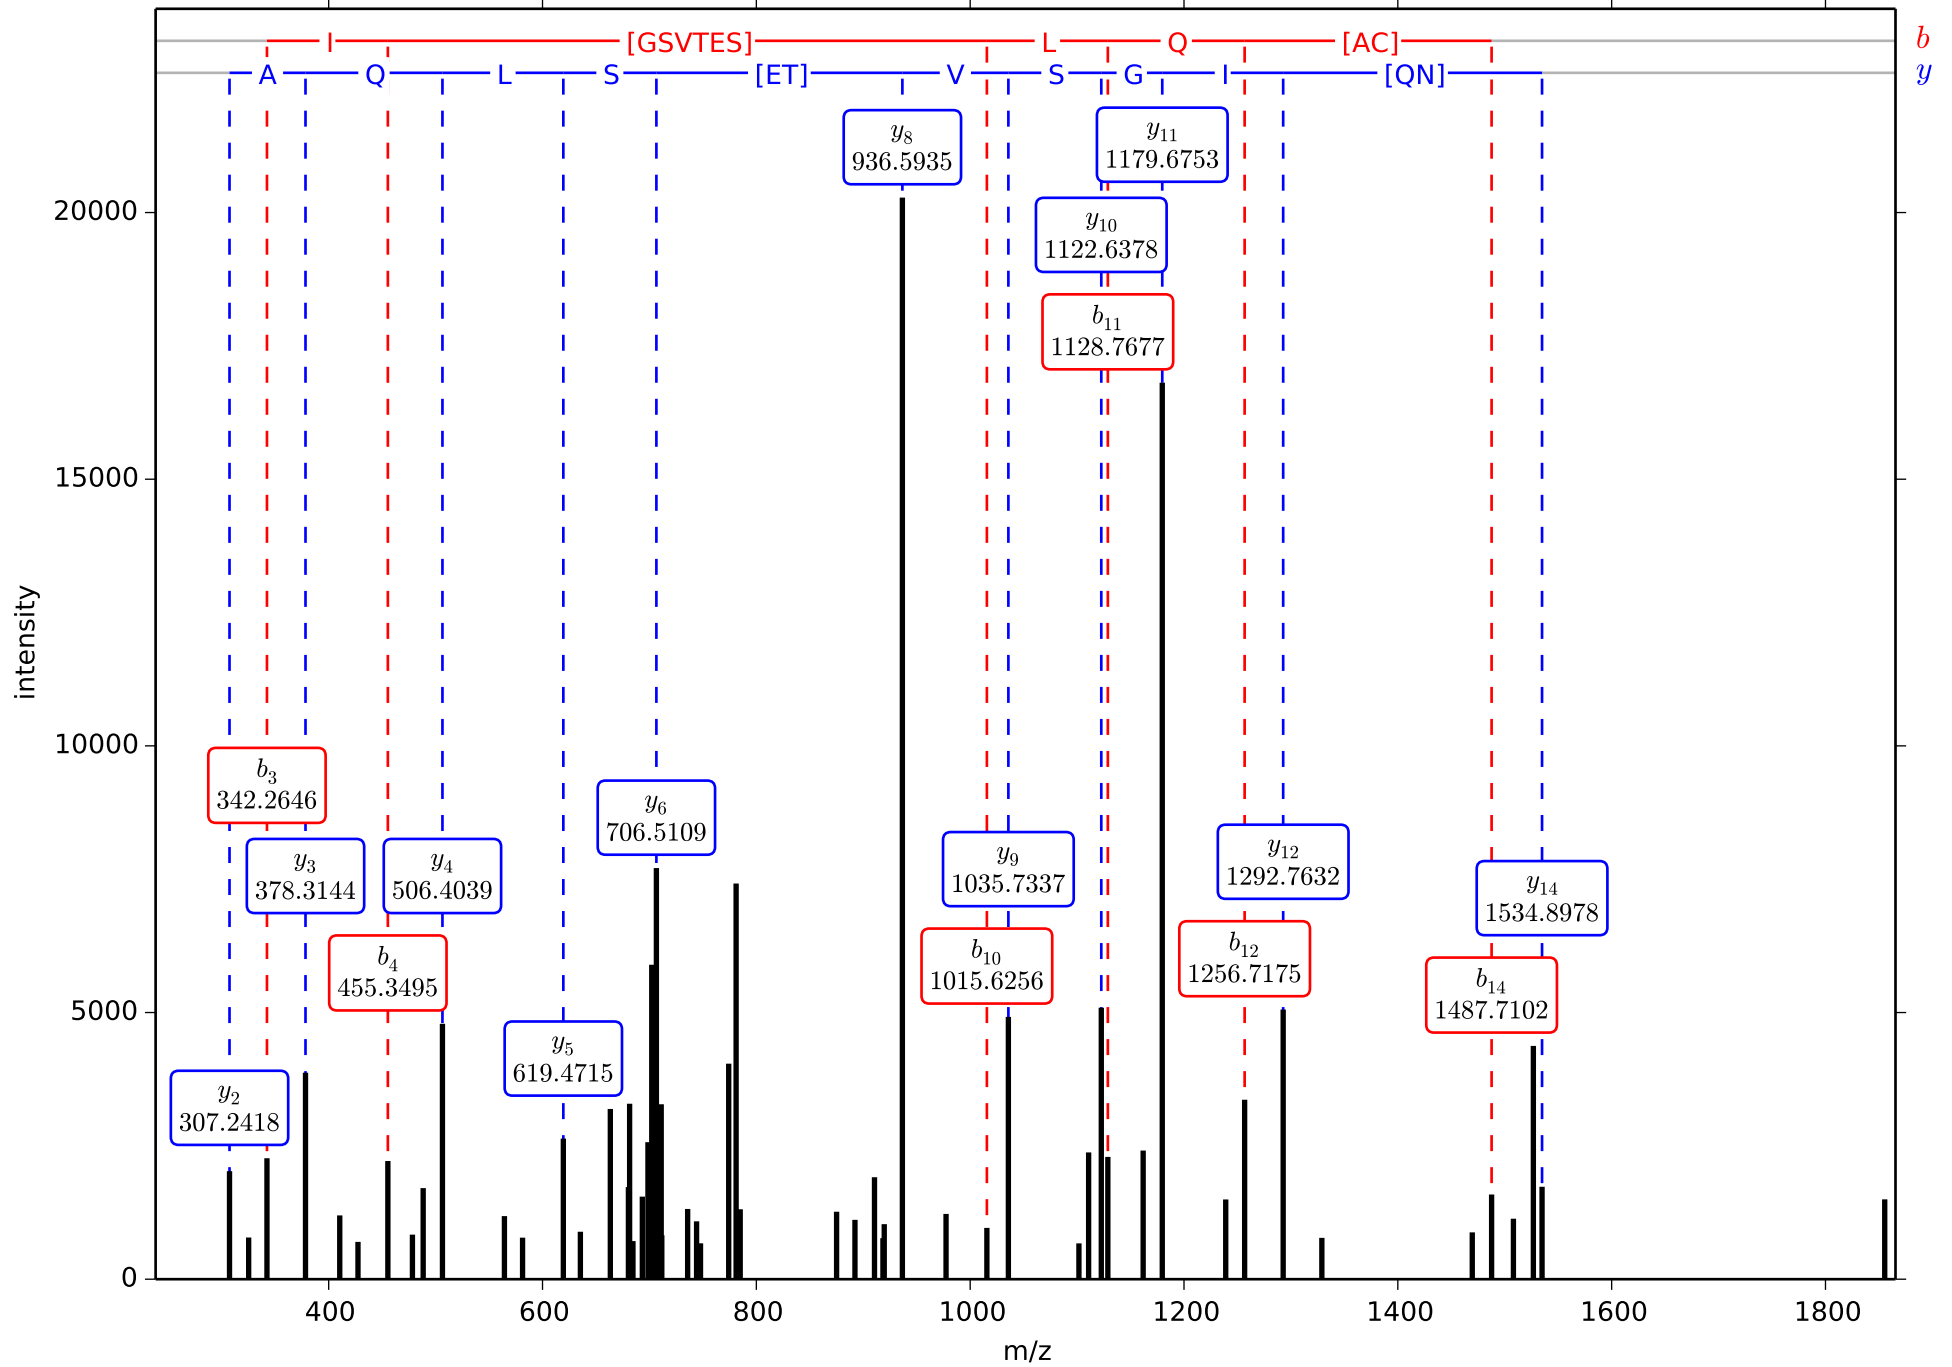

P17182 : SCNCLLLKVNQIGSVTESLQACK

parent: 874.785800,3+

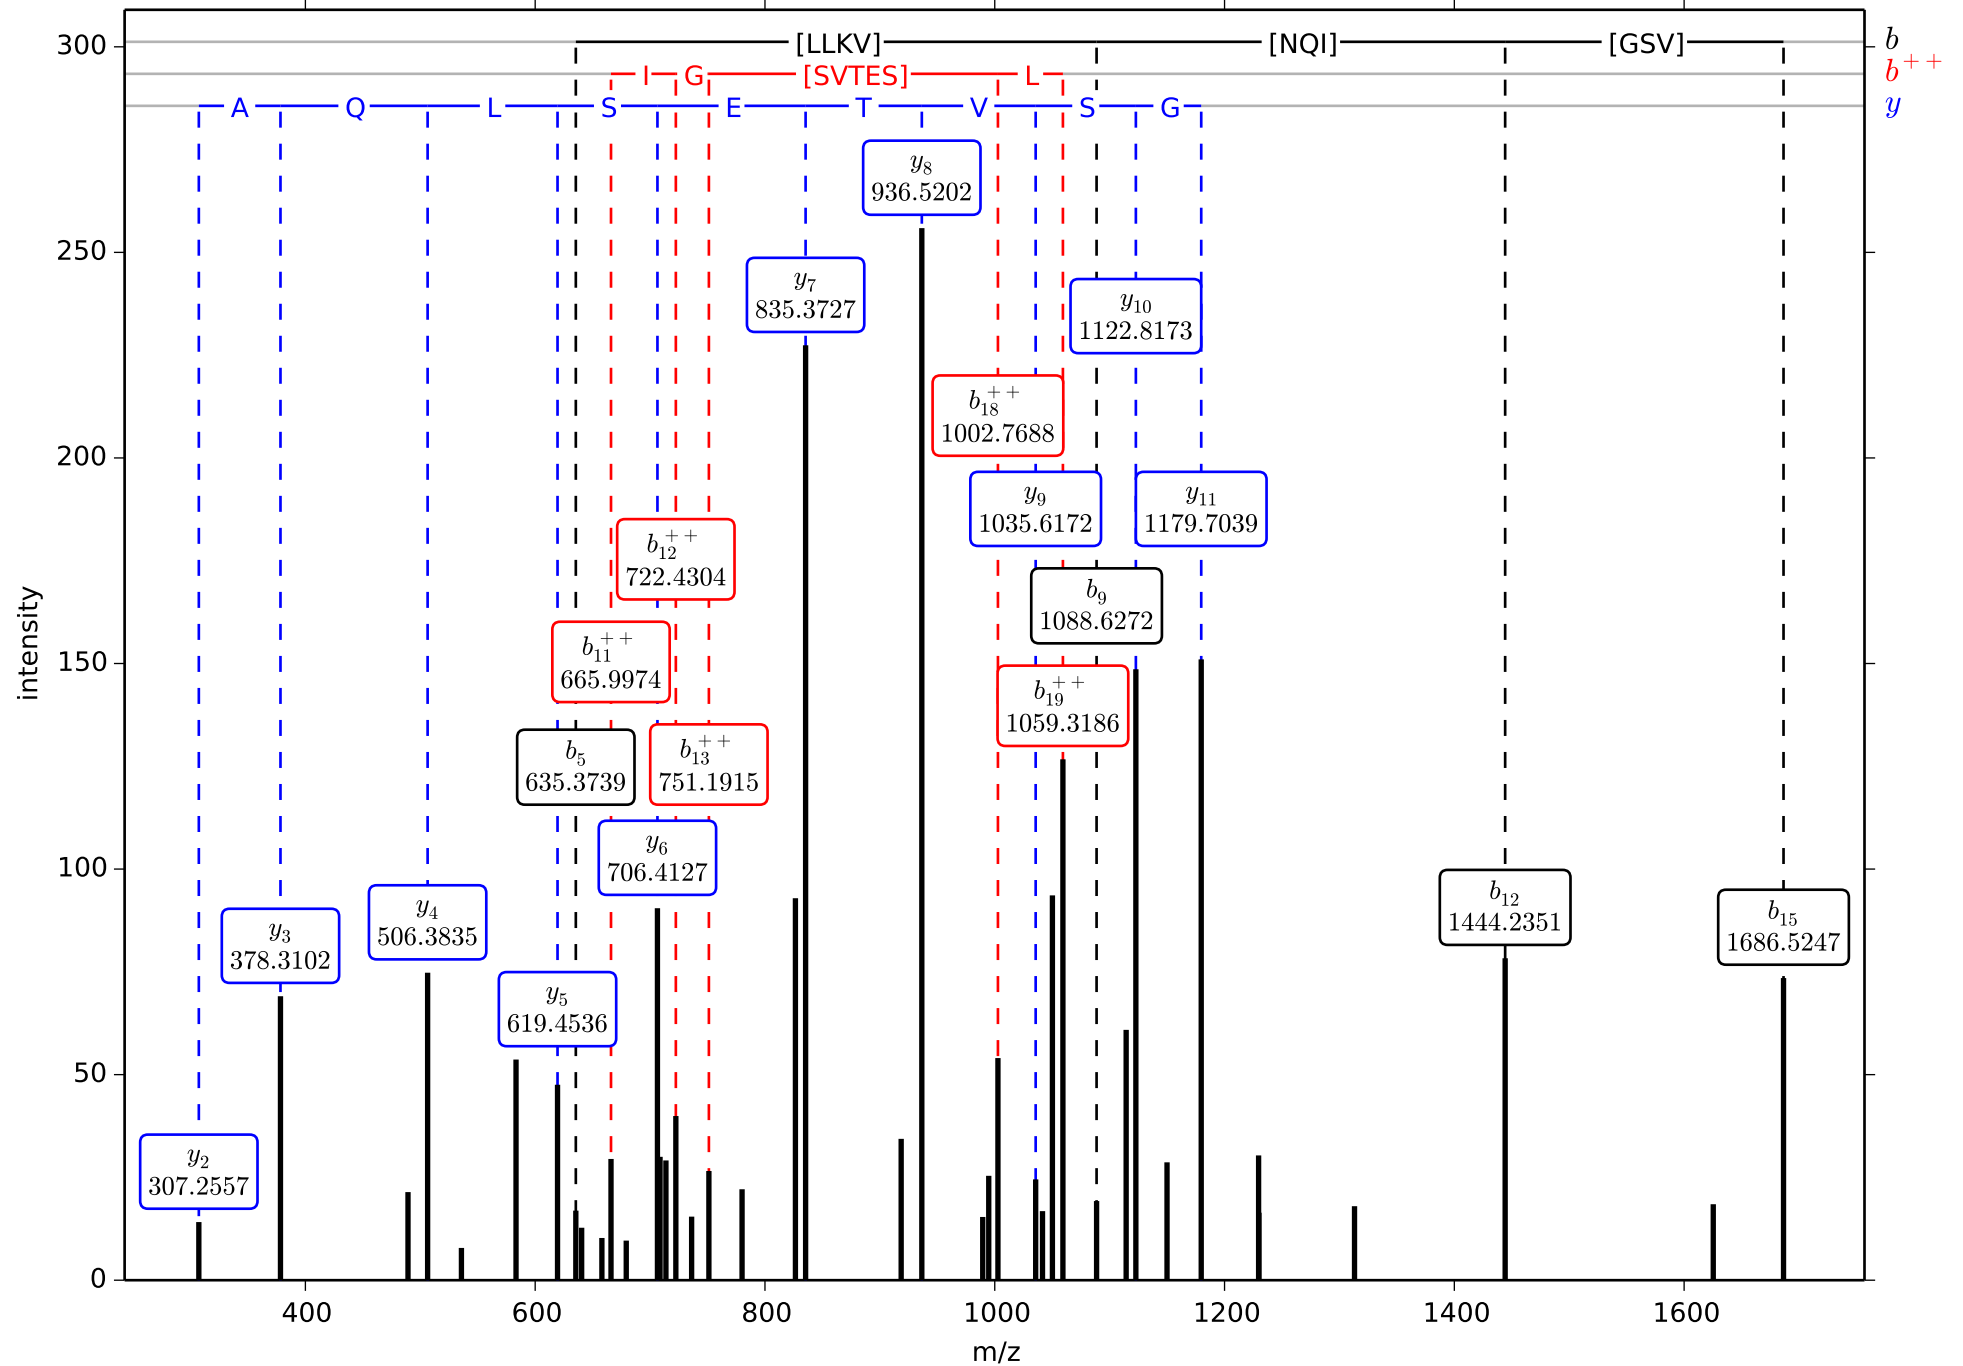

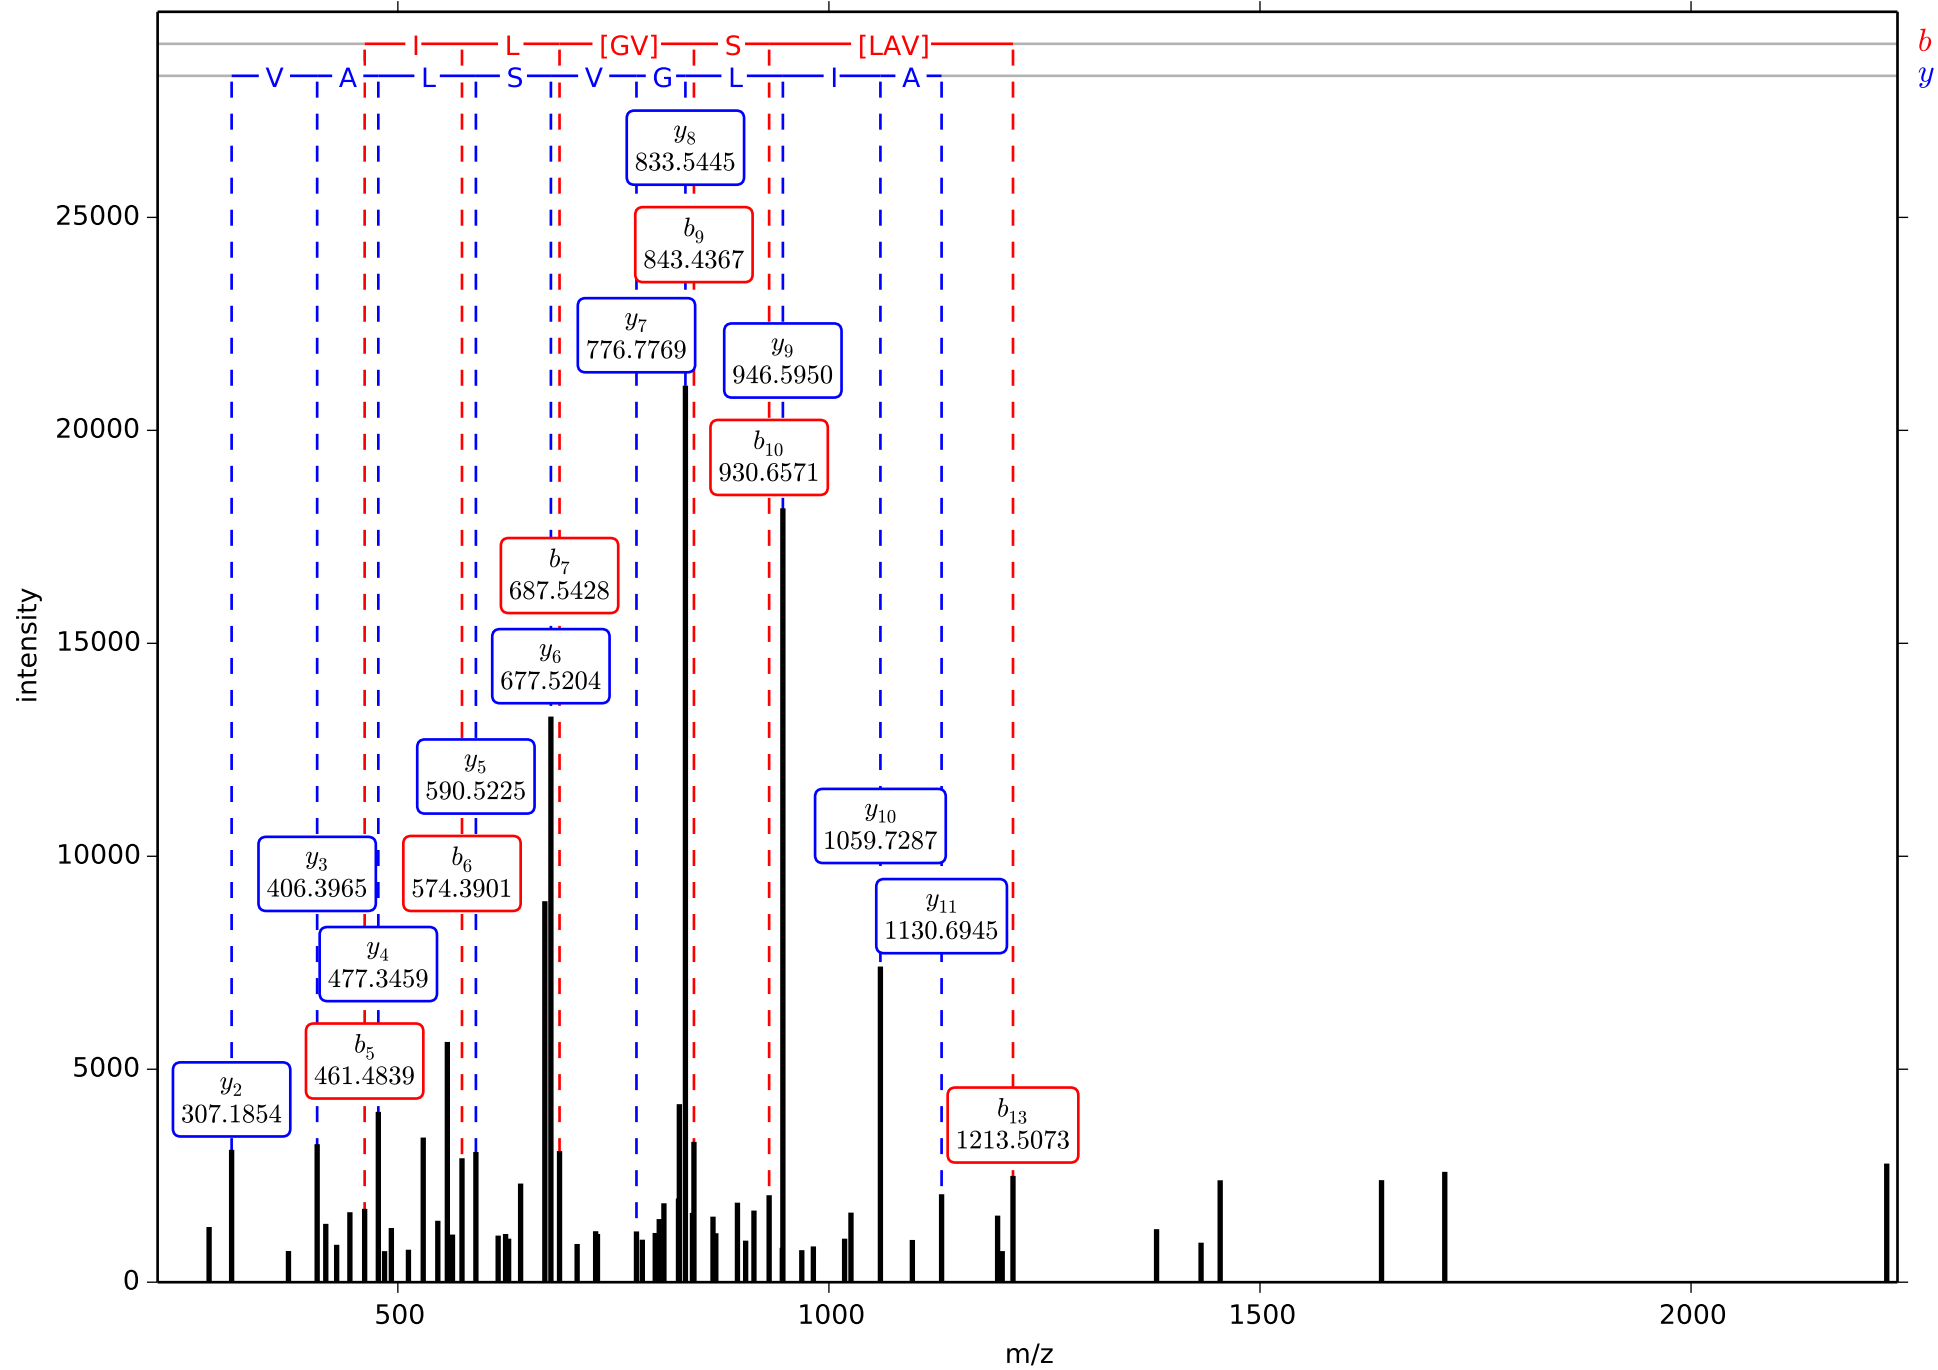

P17182 : SGETEDTFIADLVVGLCTGQIK

parent: 1177.095400,2+

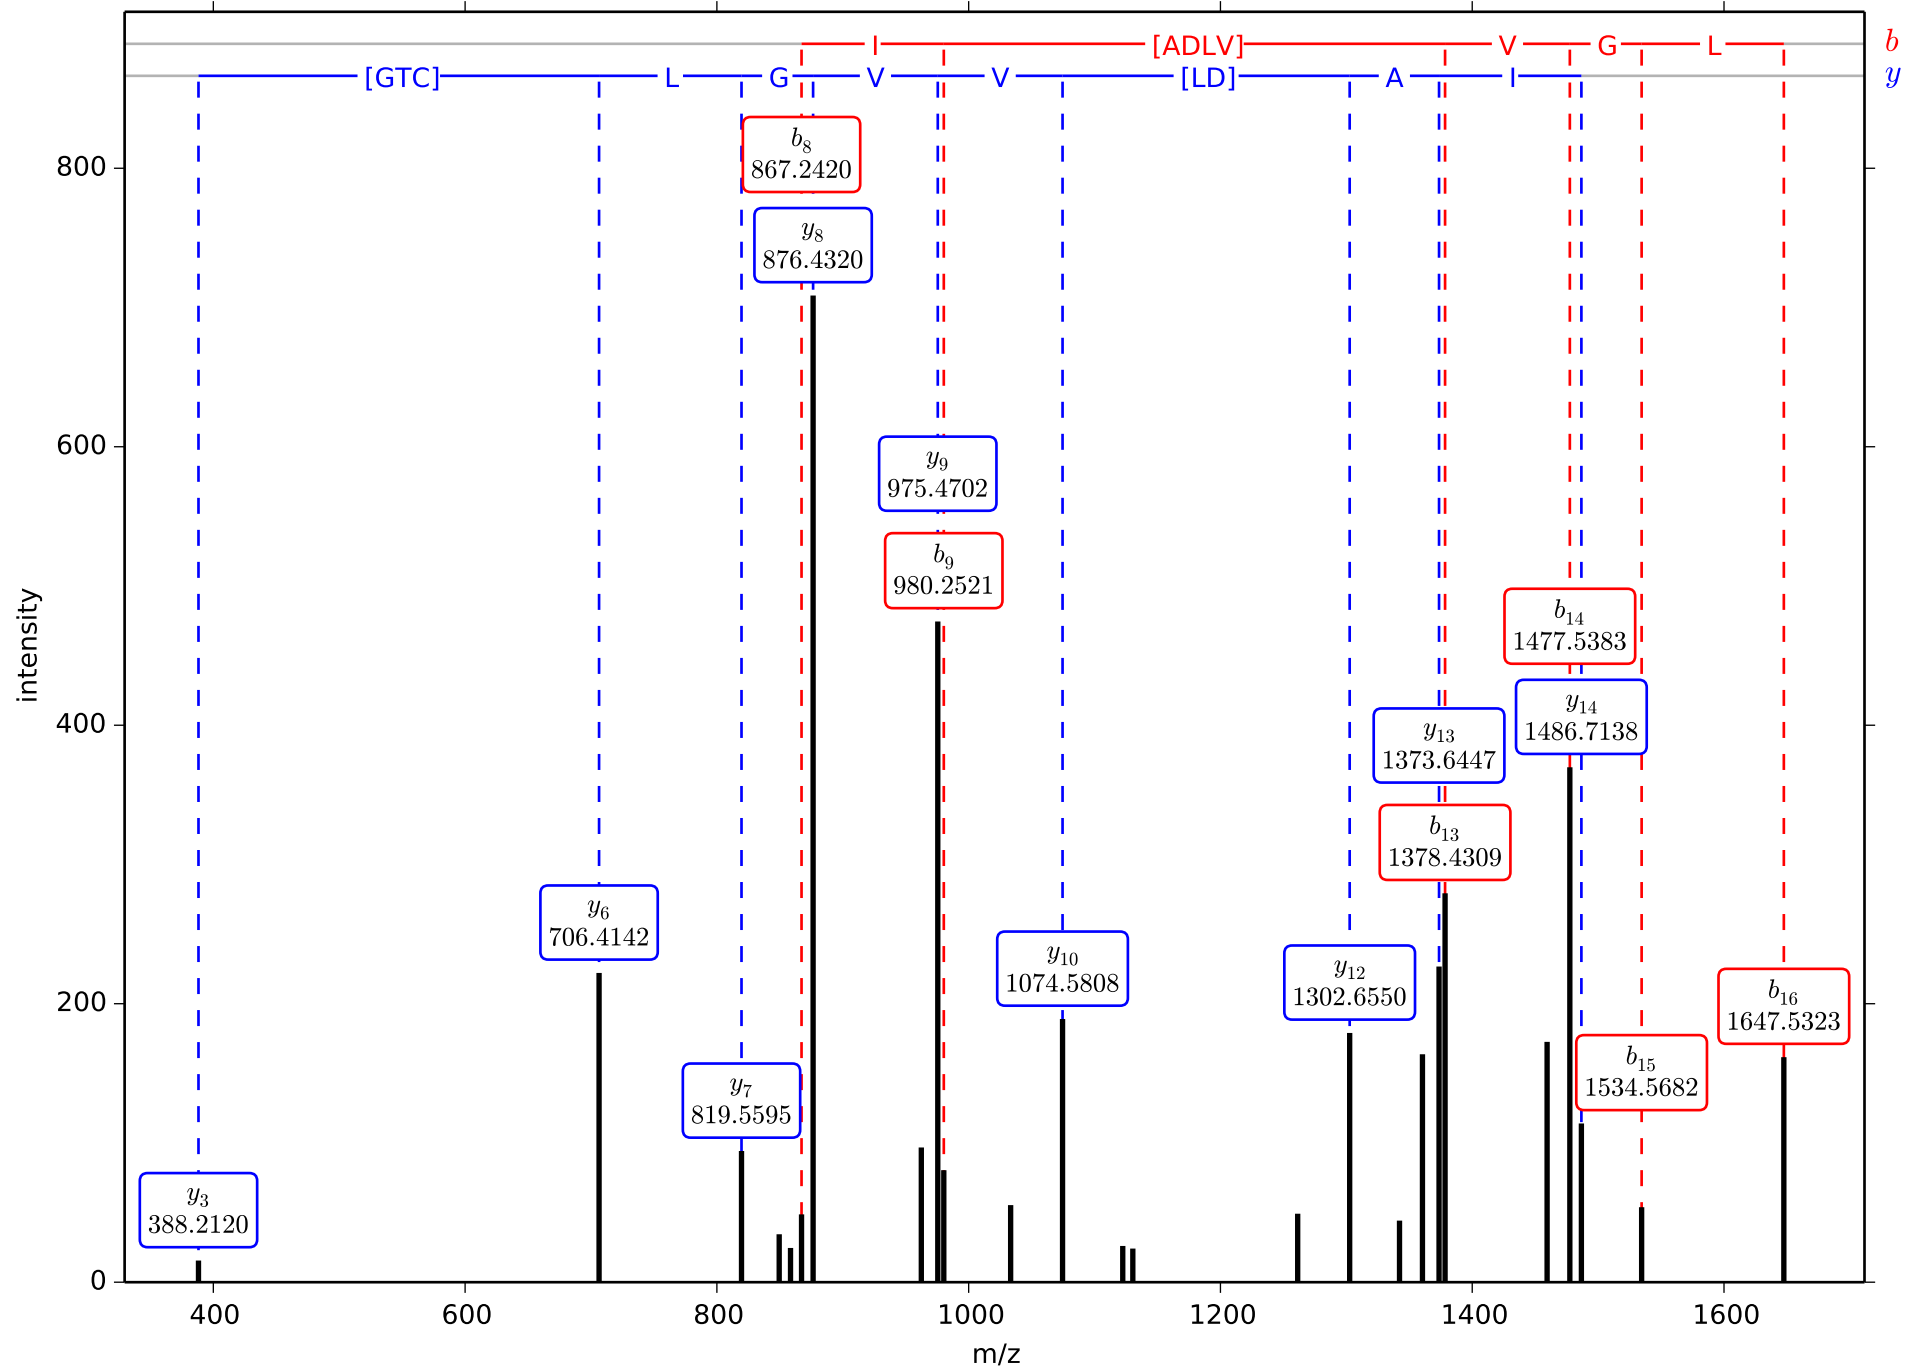

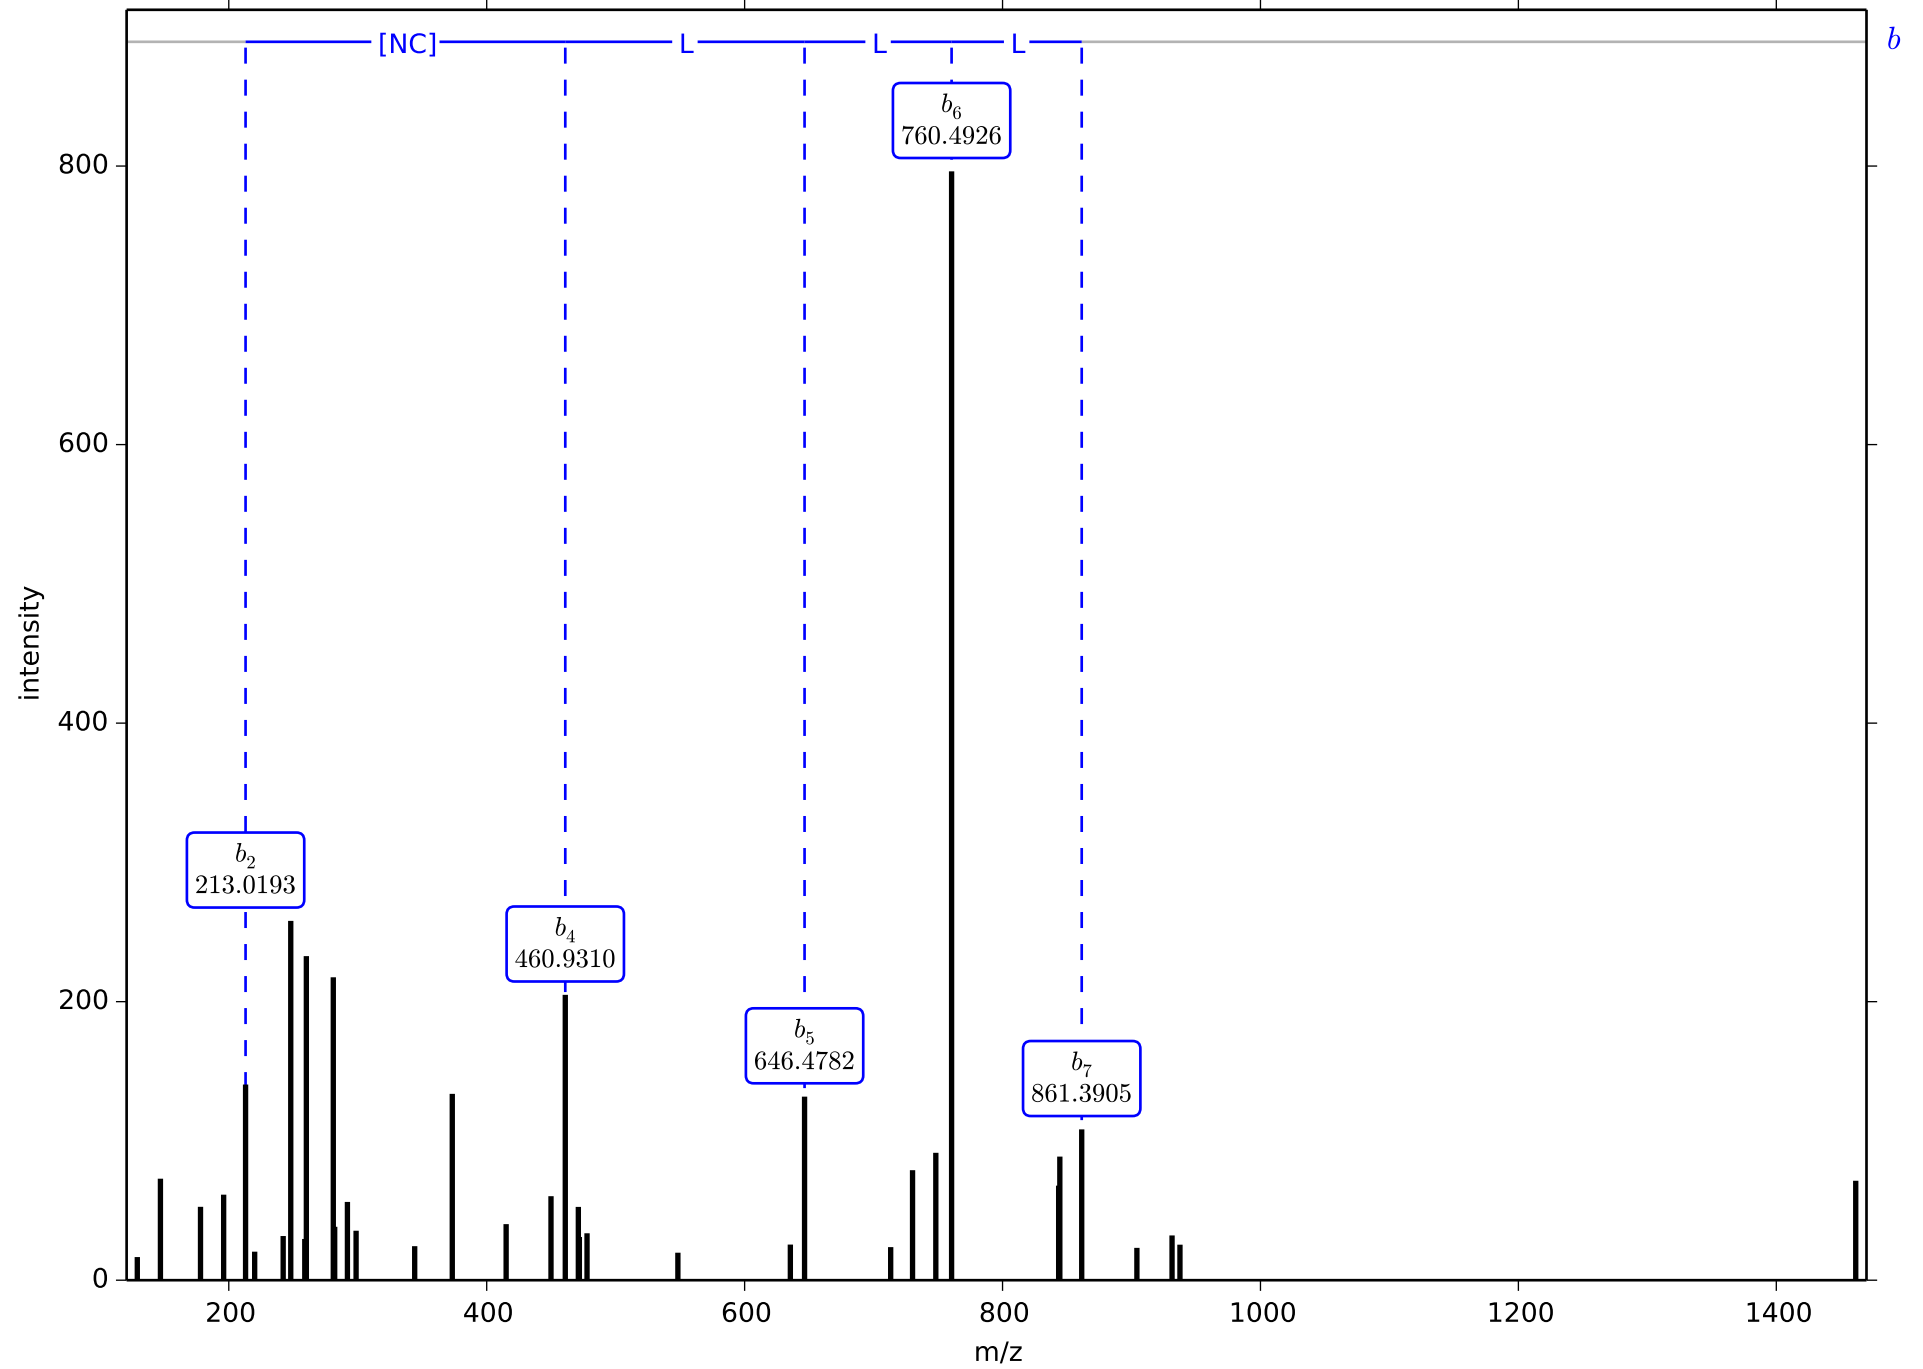

P17183 : VNQIGSVTEAIQACK

parent: 809.409560,2+

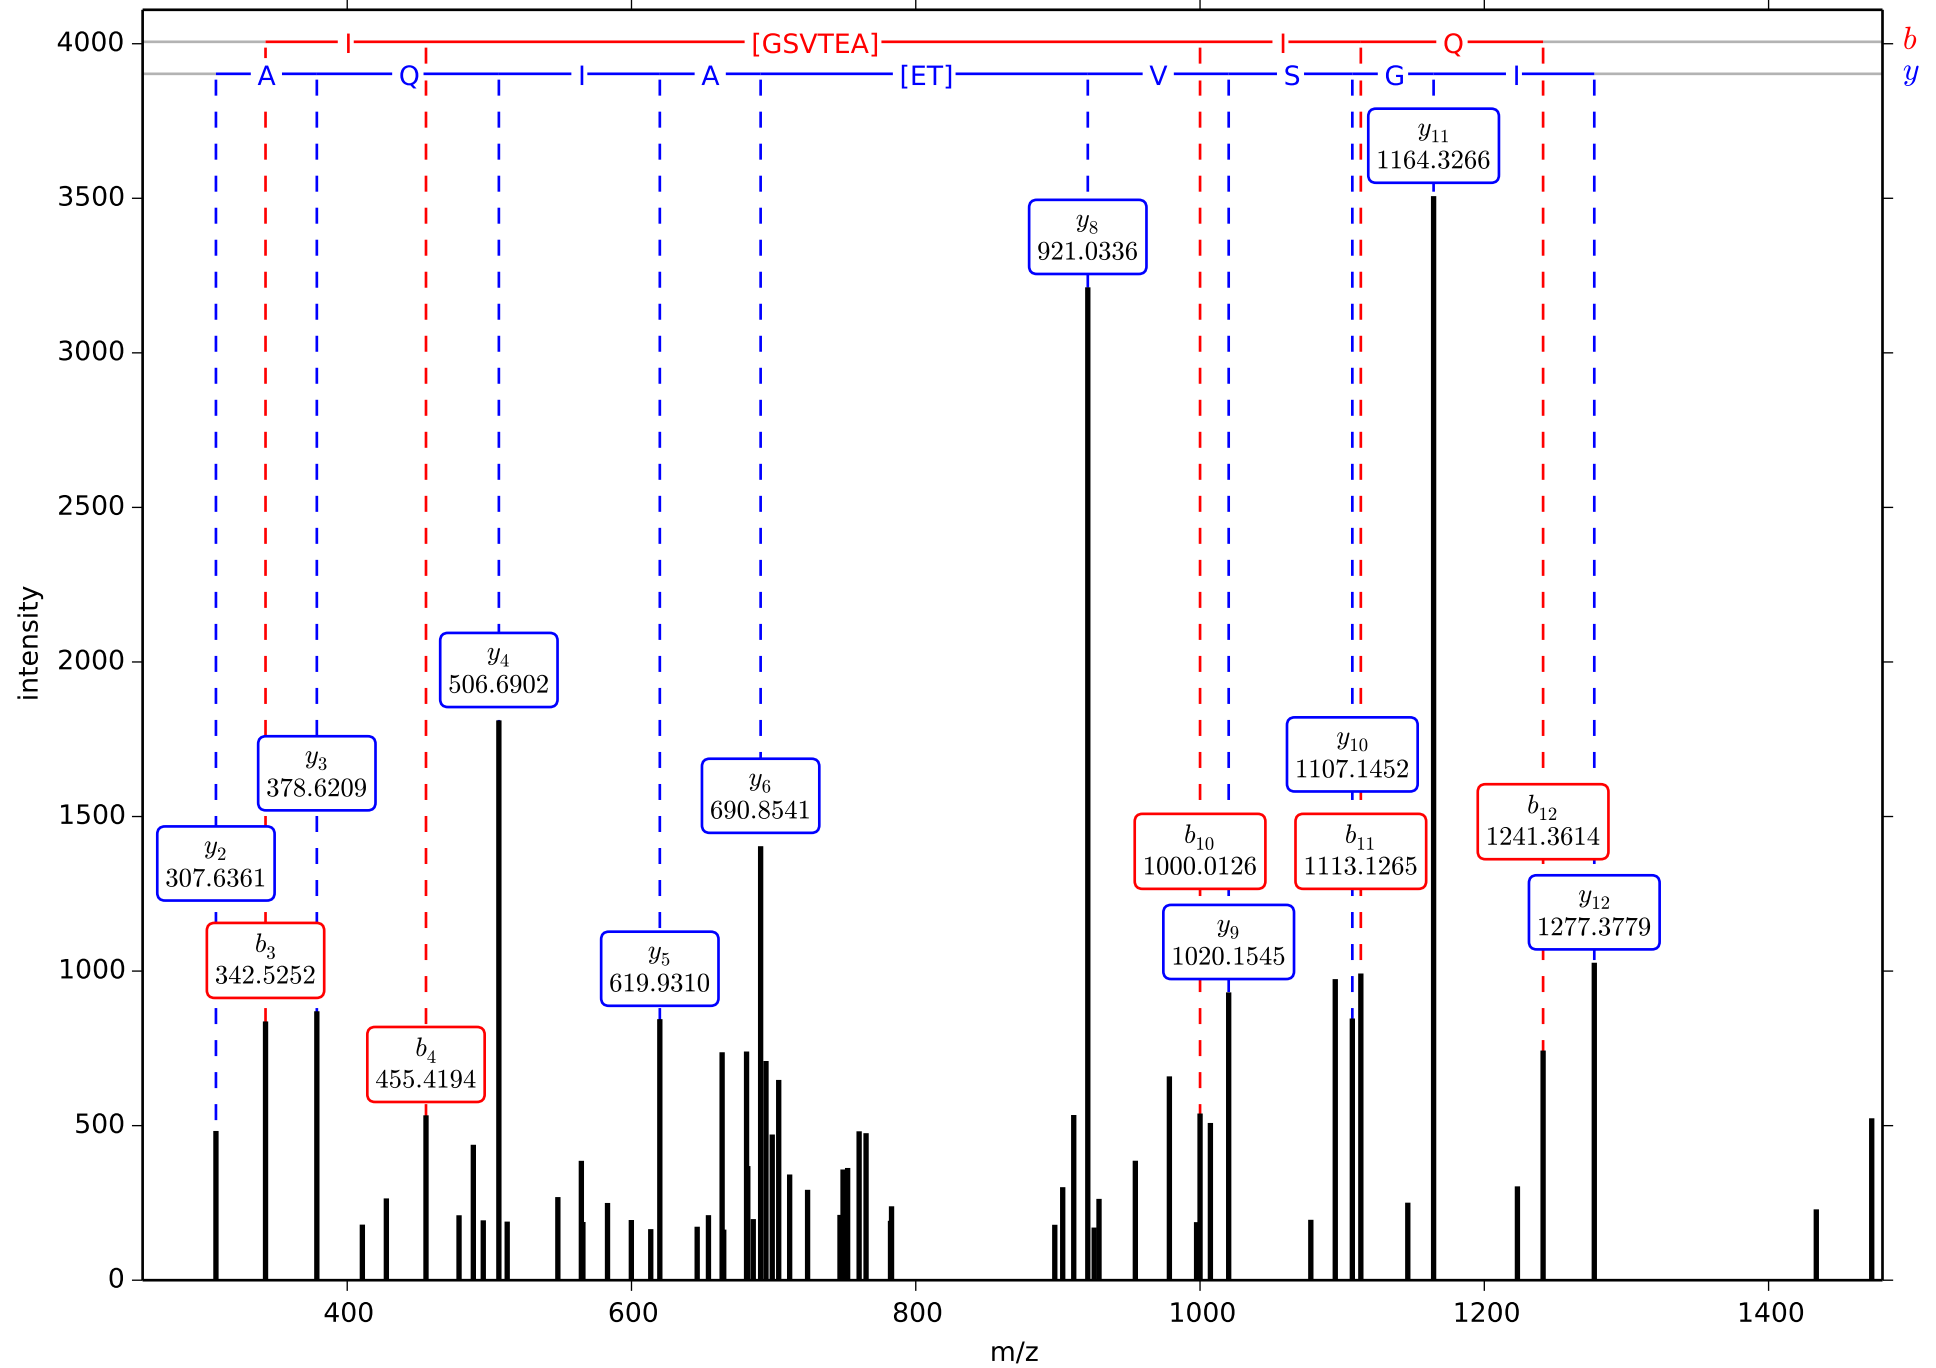

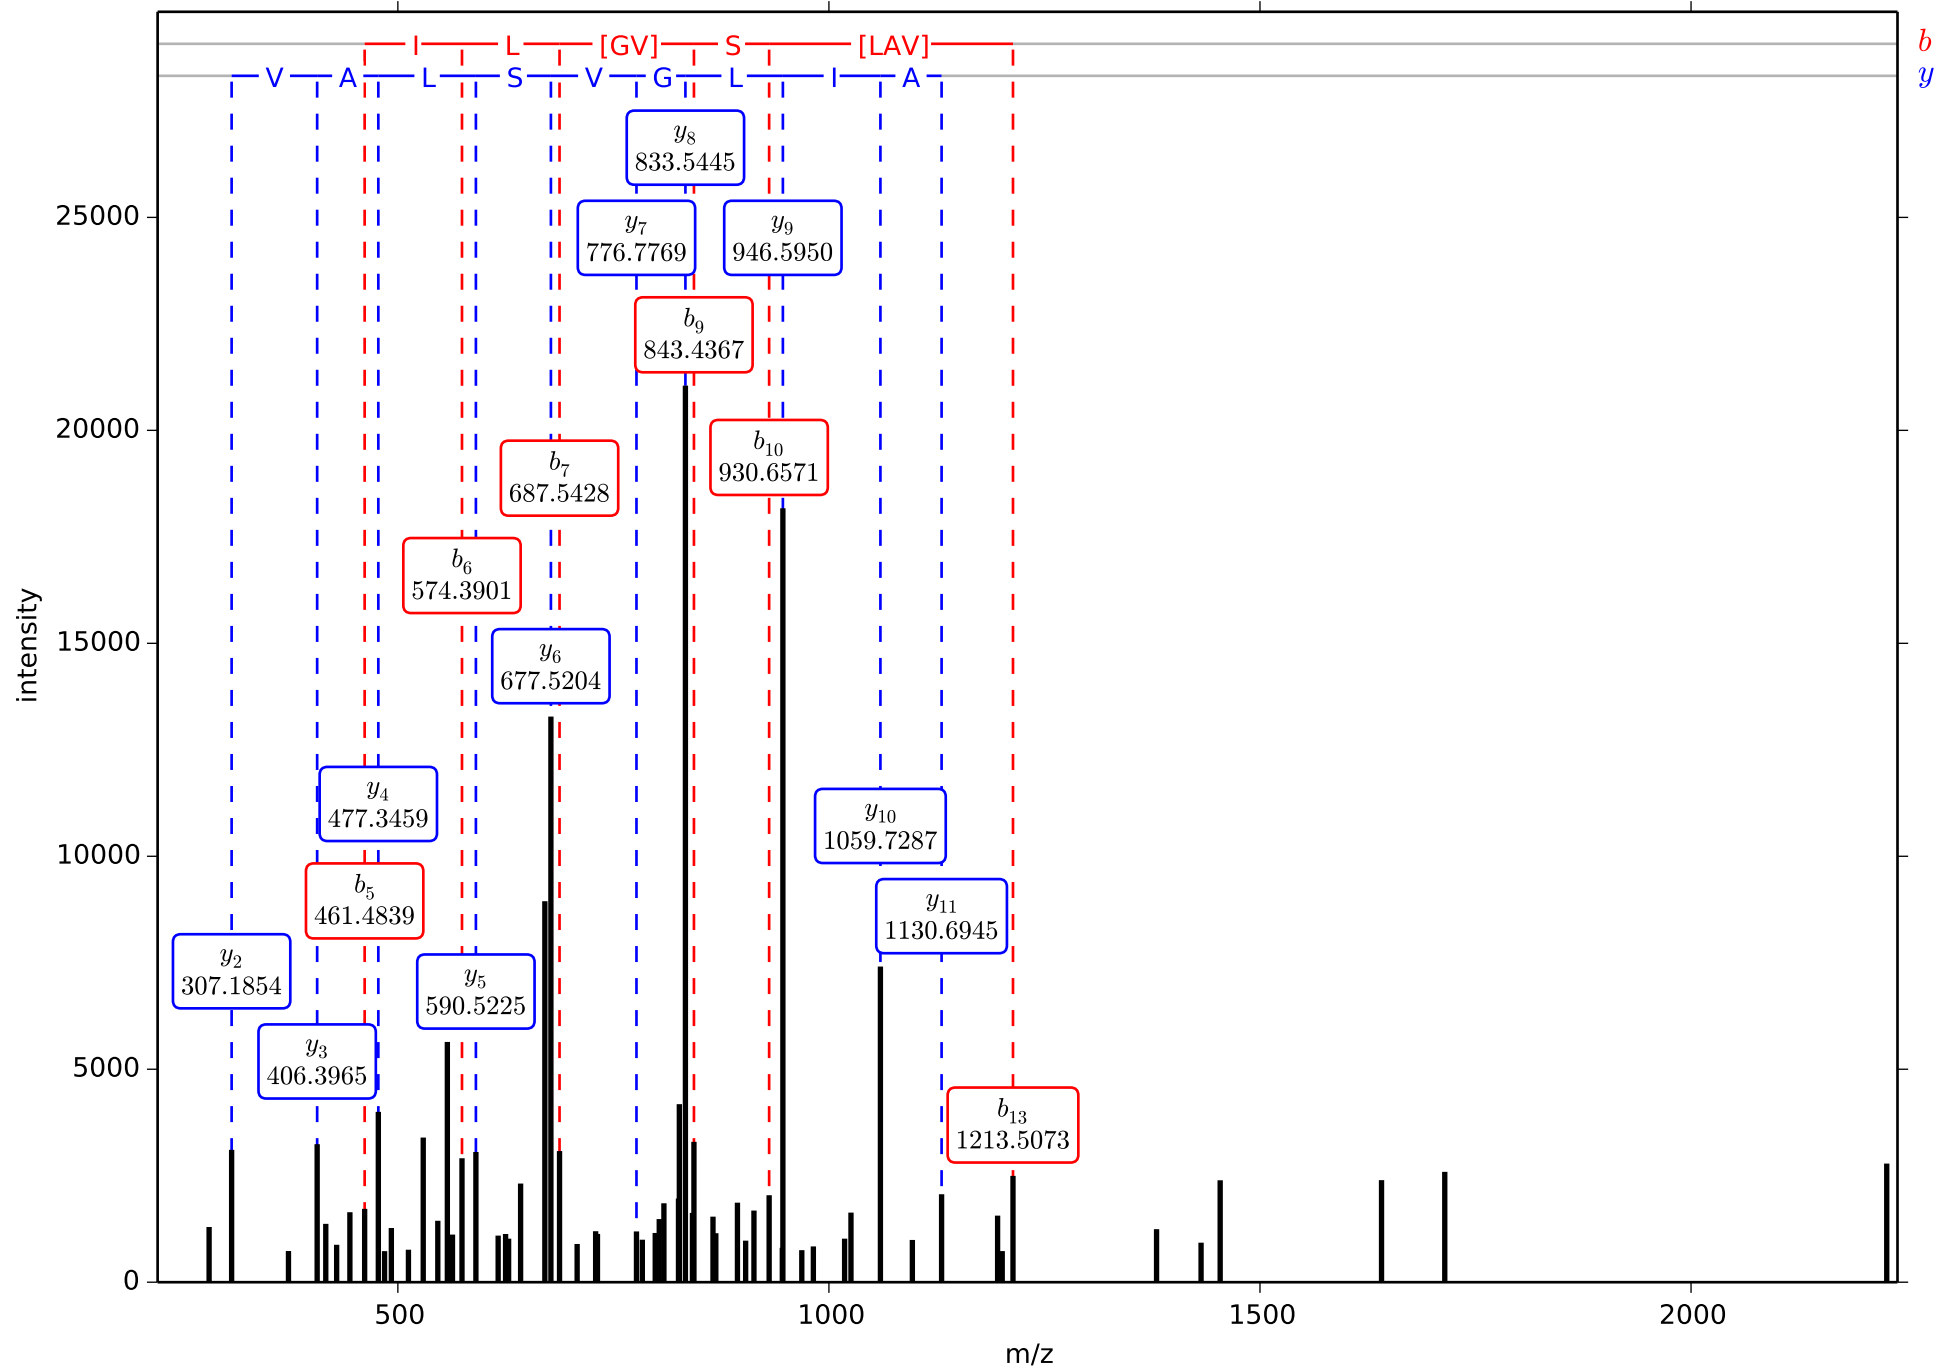



P17183 : SGETEDTFIADLVVGLCTGQIK

parent: 1177.095400,2+

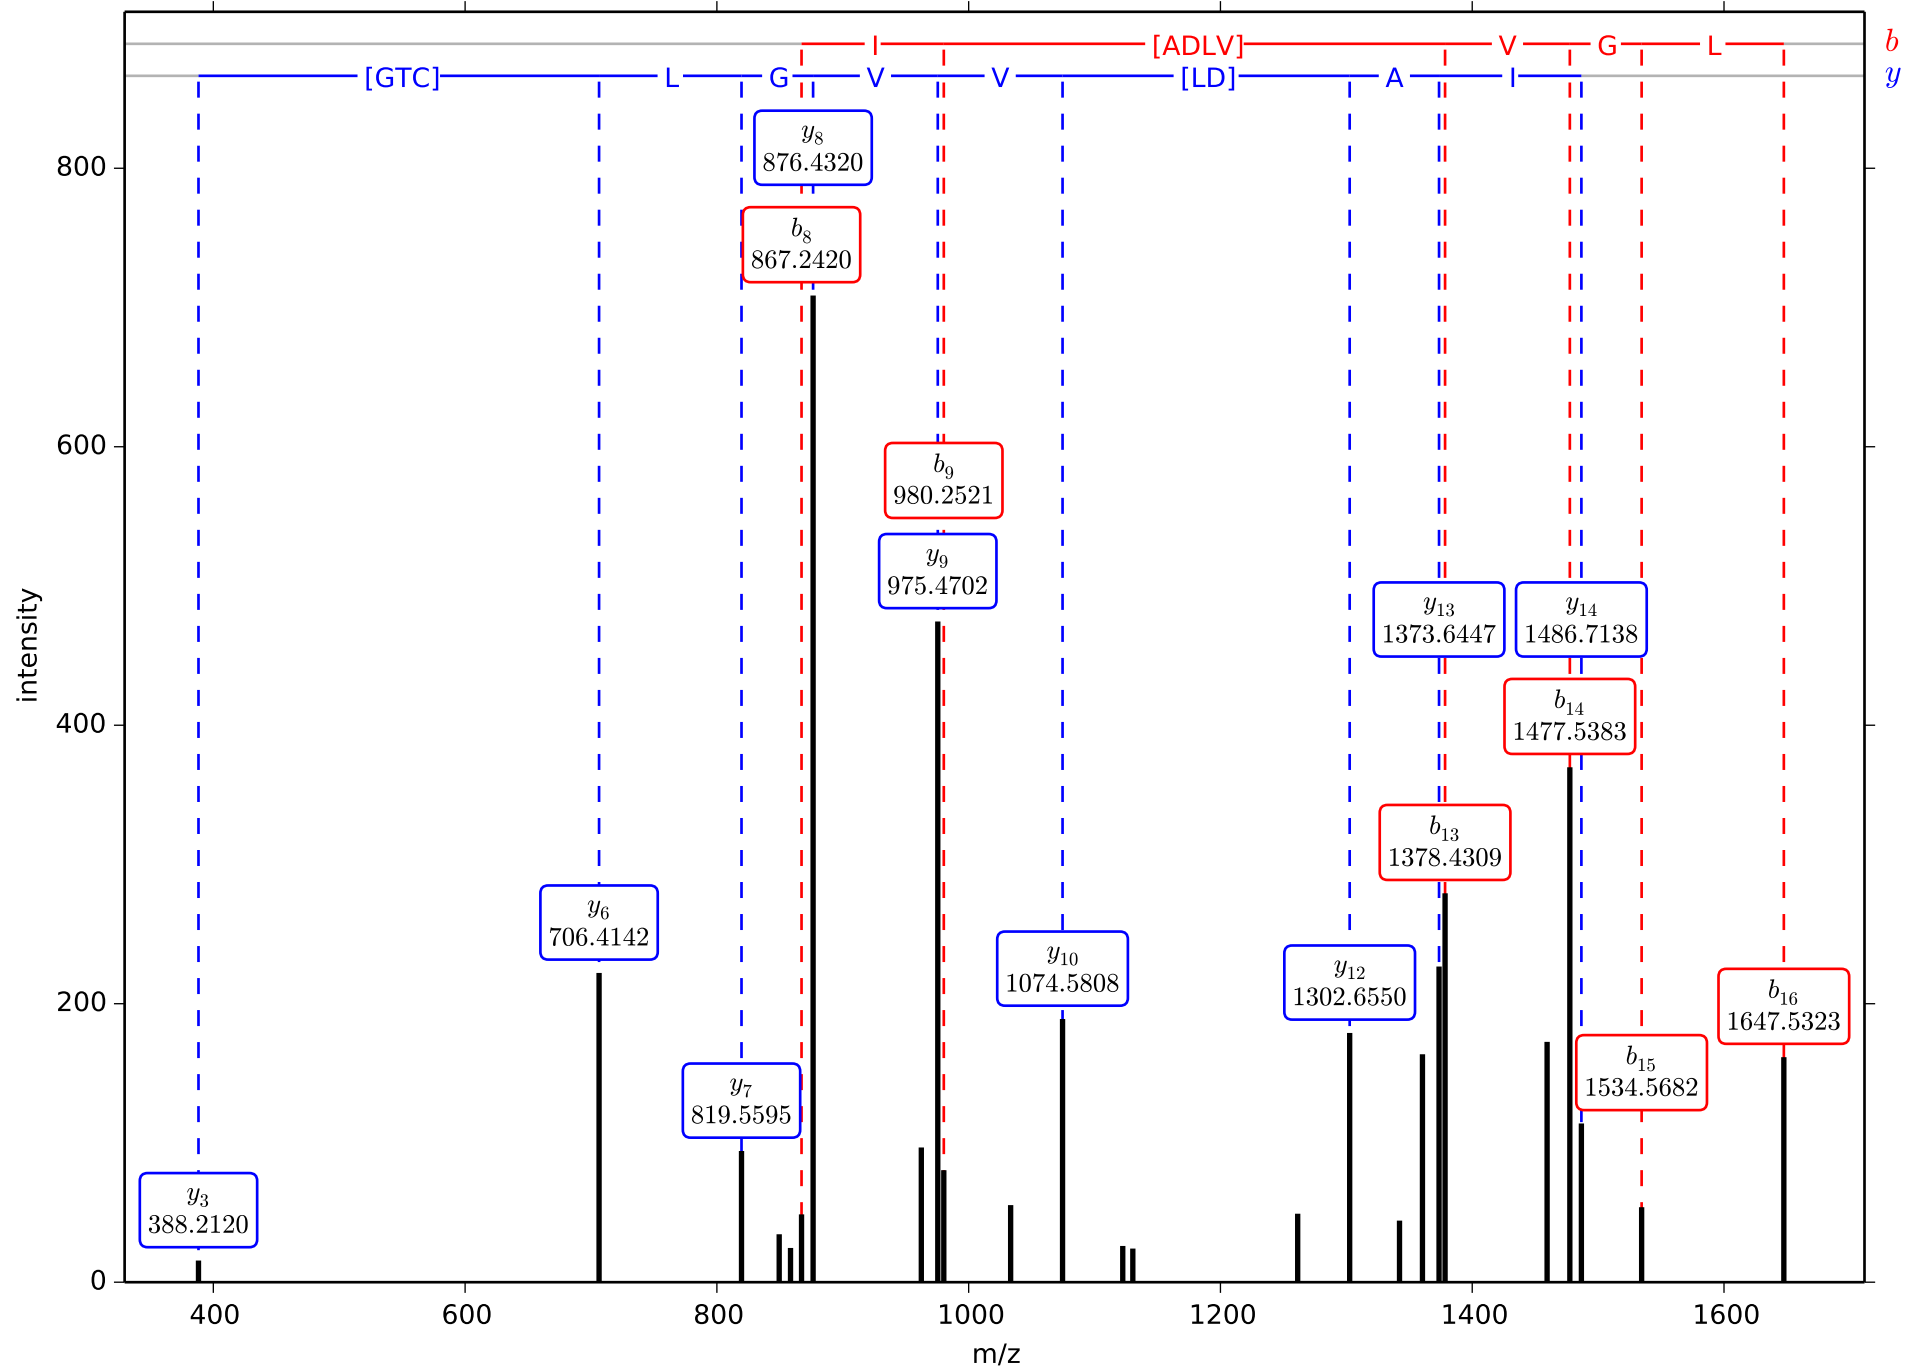

P17183 : ACNCLLLK

parent: 496.262400,2+

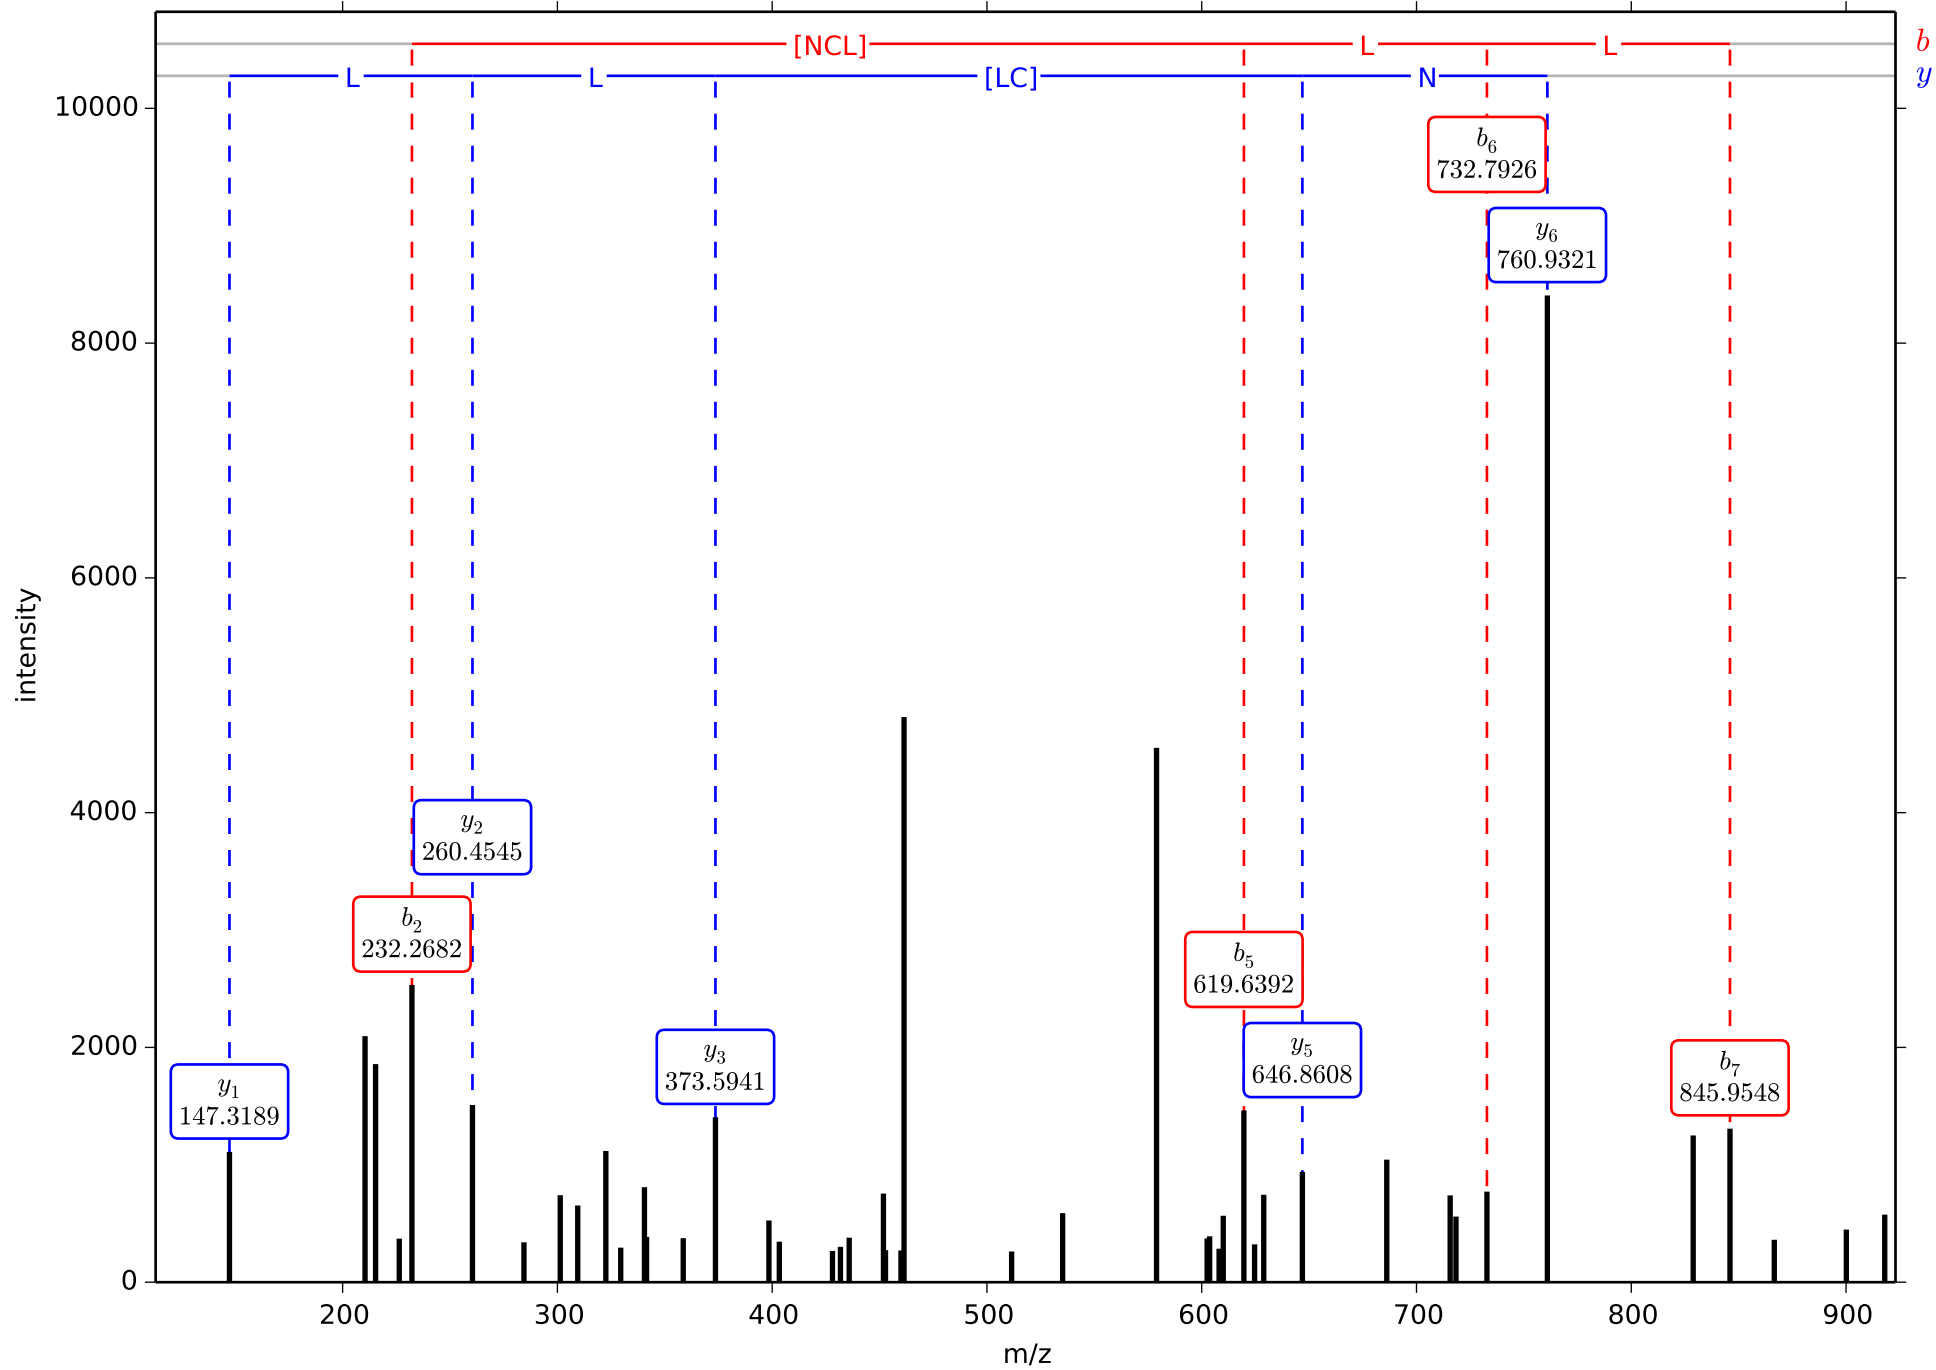

P21550 : VNQIGSVTESIQACK

parent: 817.413740,2+

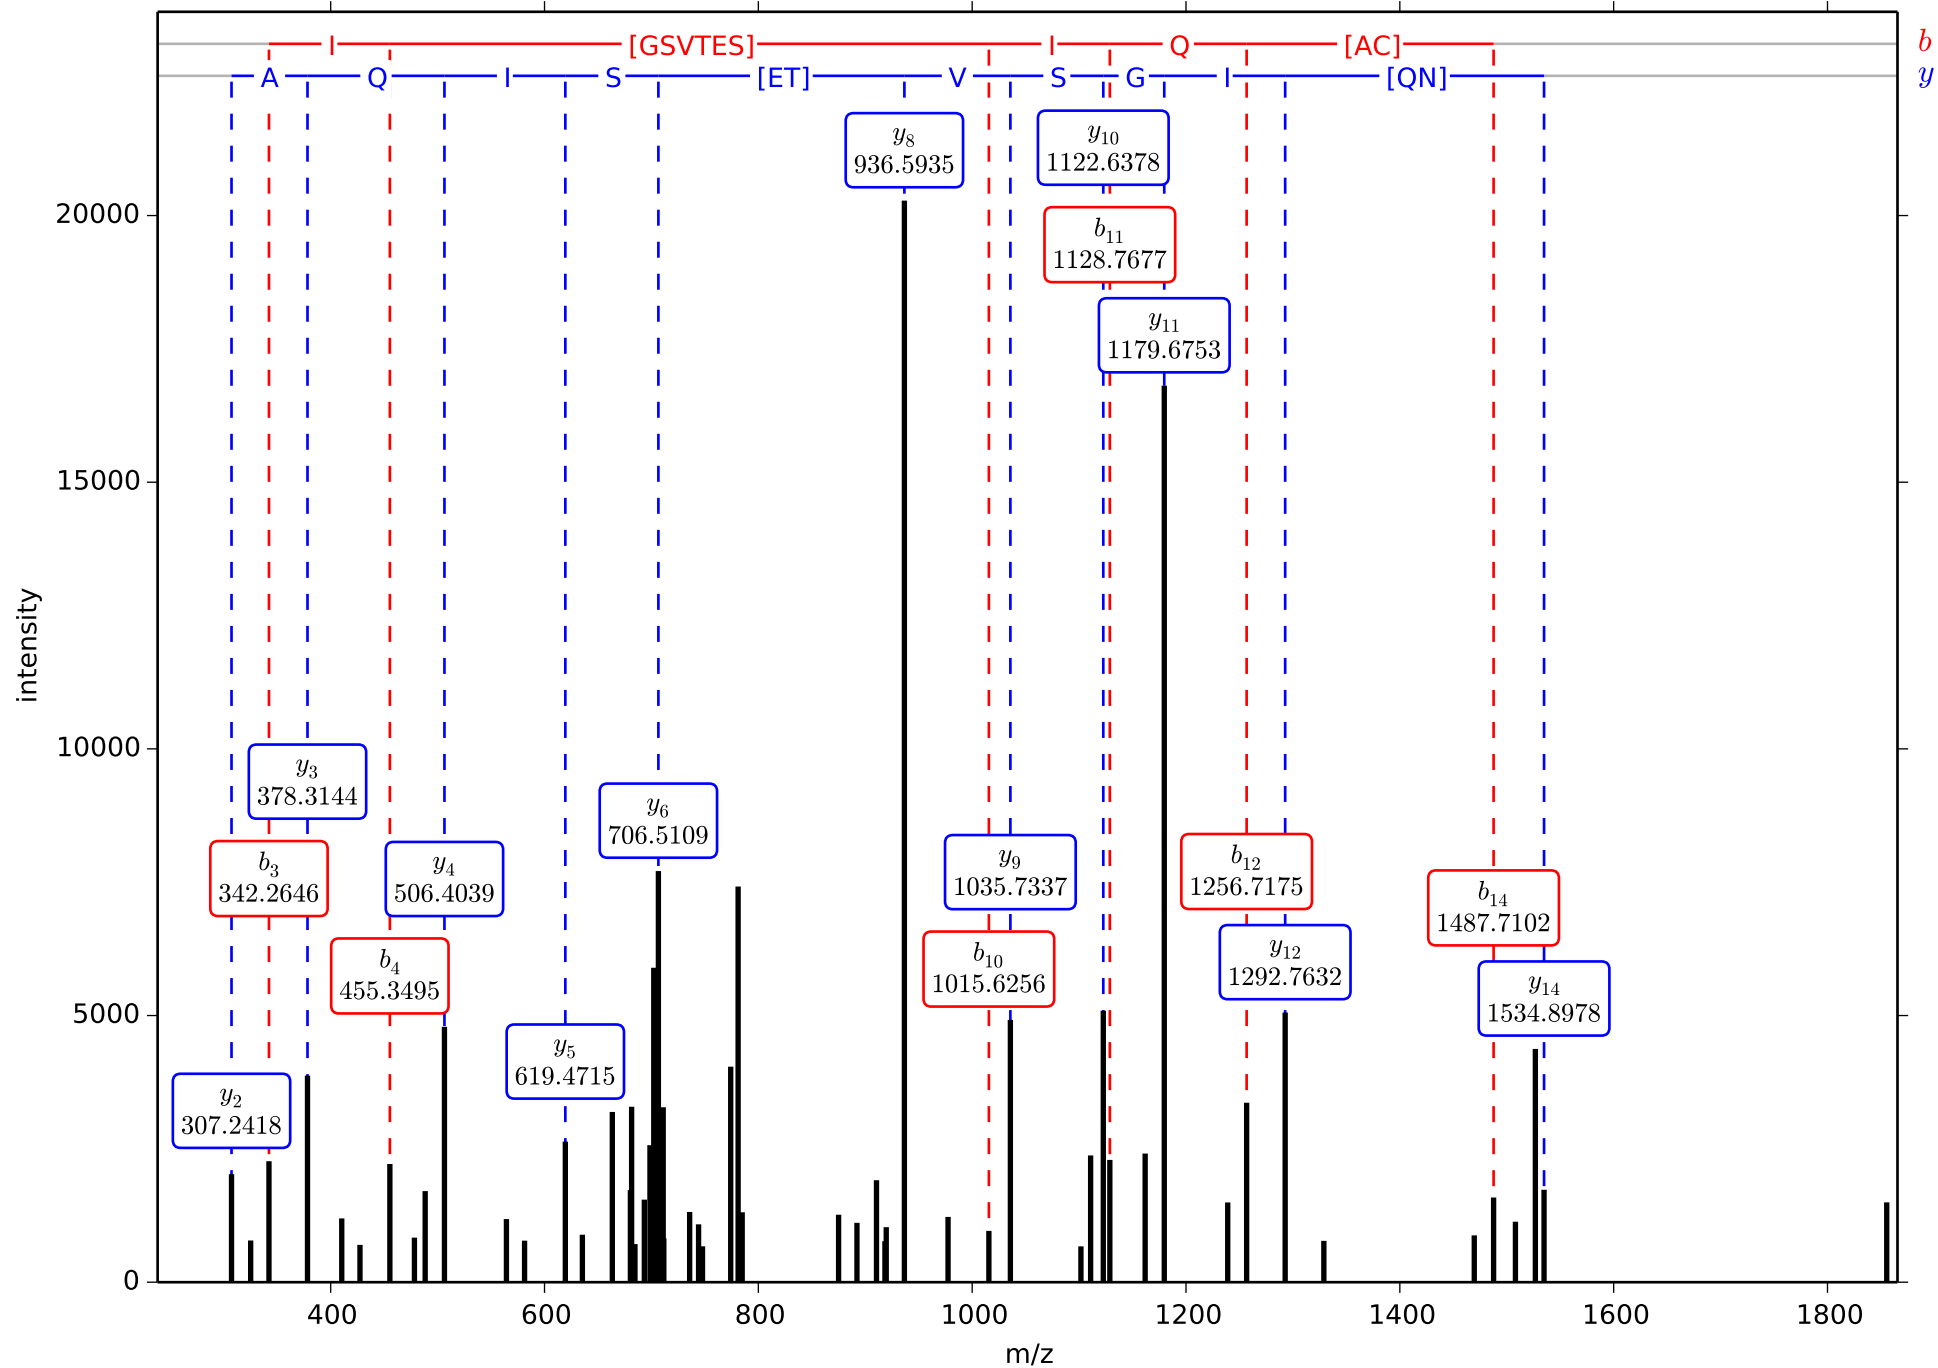

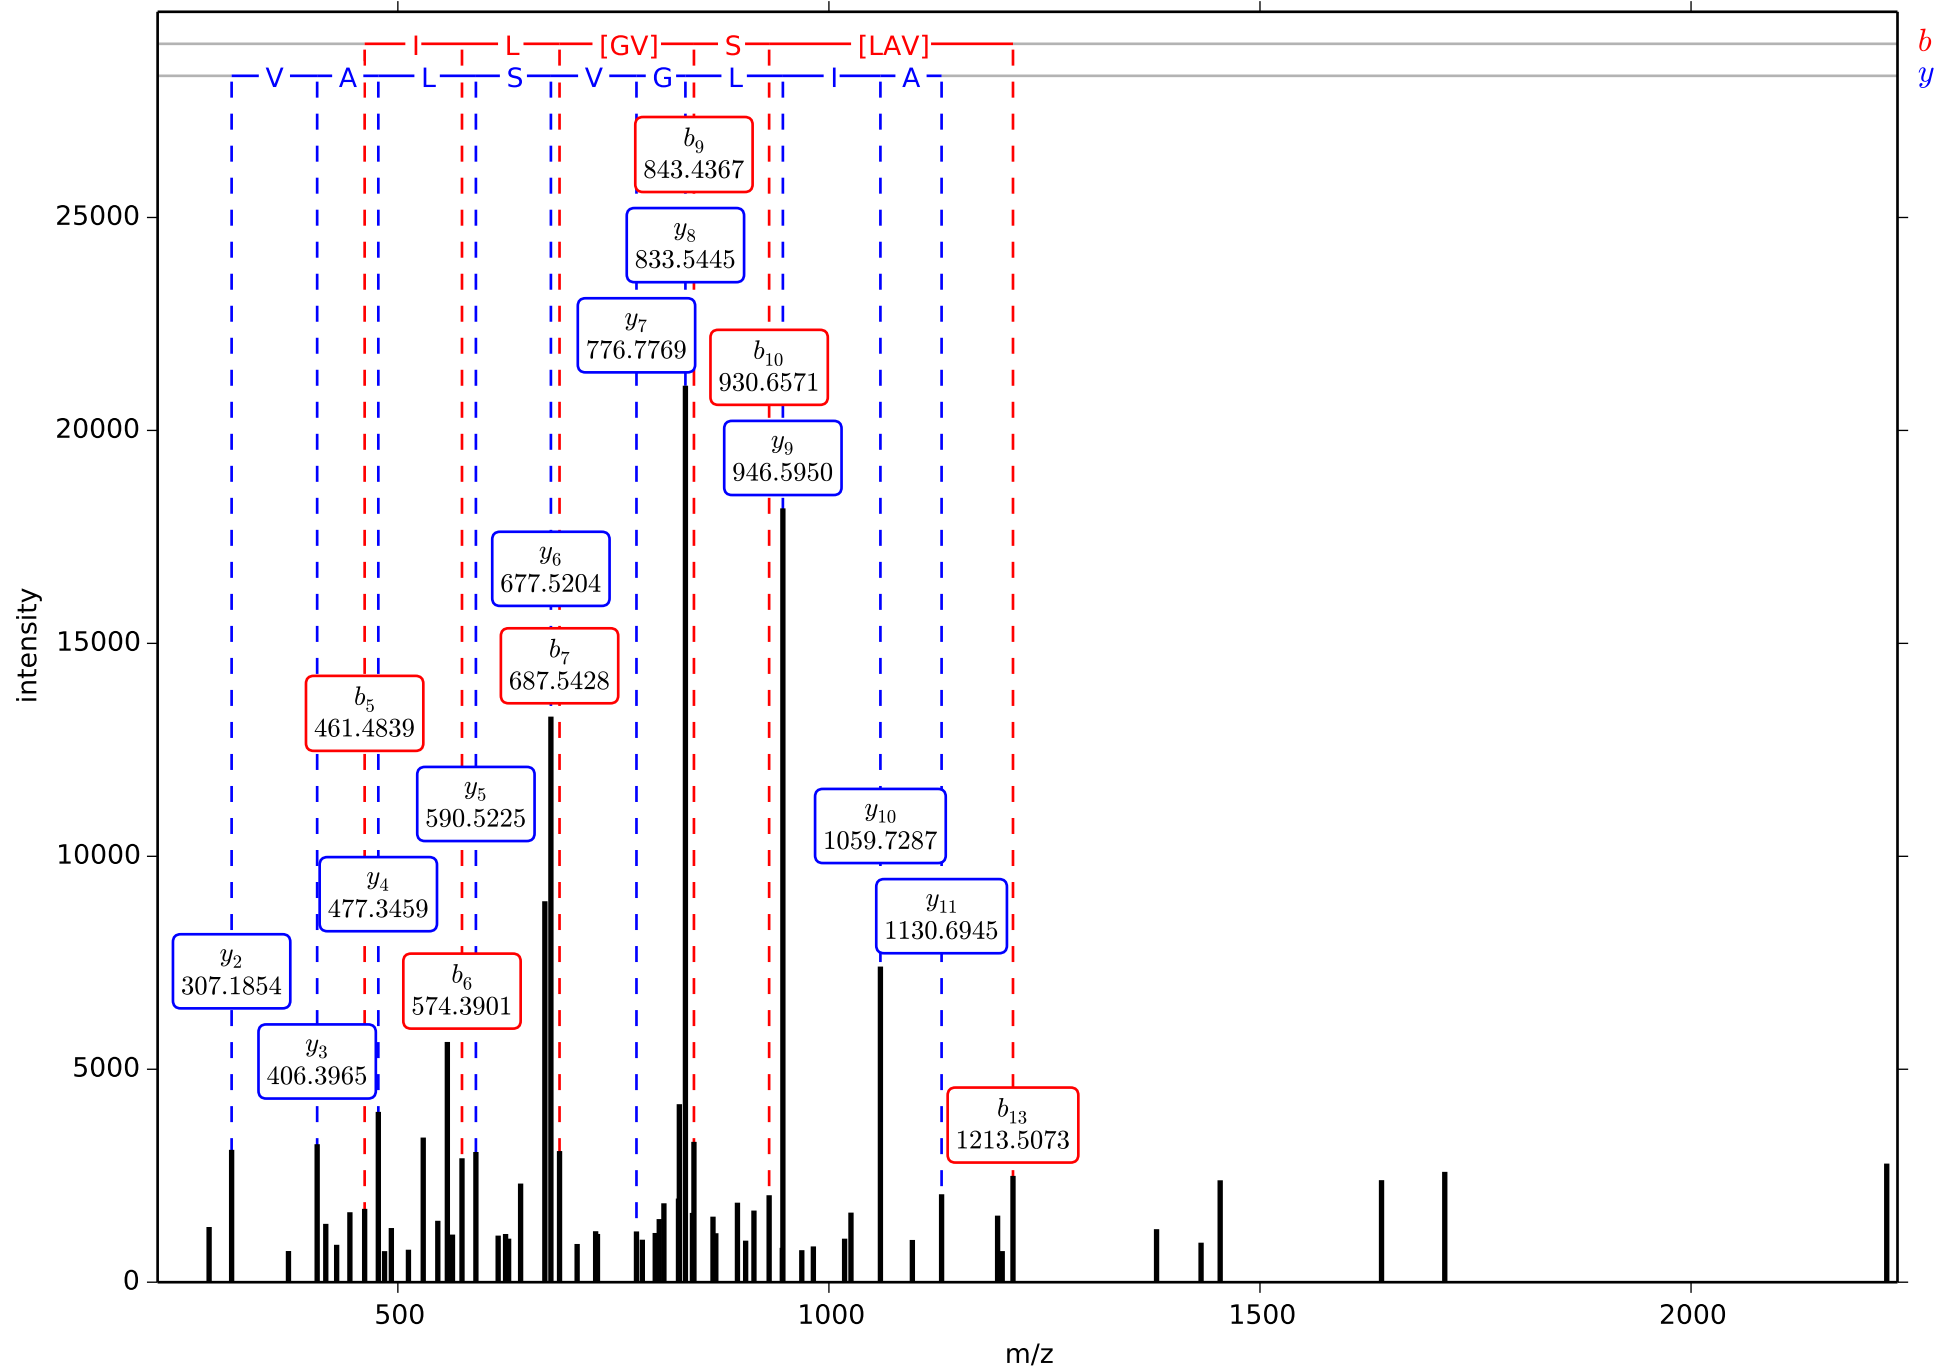

P21550 : SGETEDTFIADLVVGLCTGQIK

parent: 1177.095400,2+

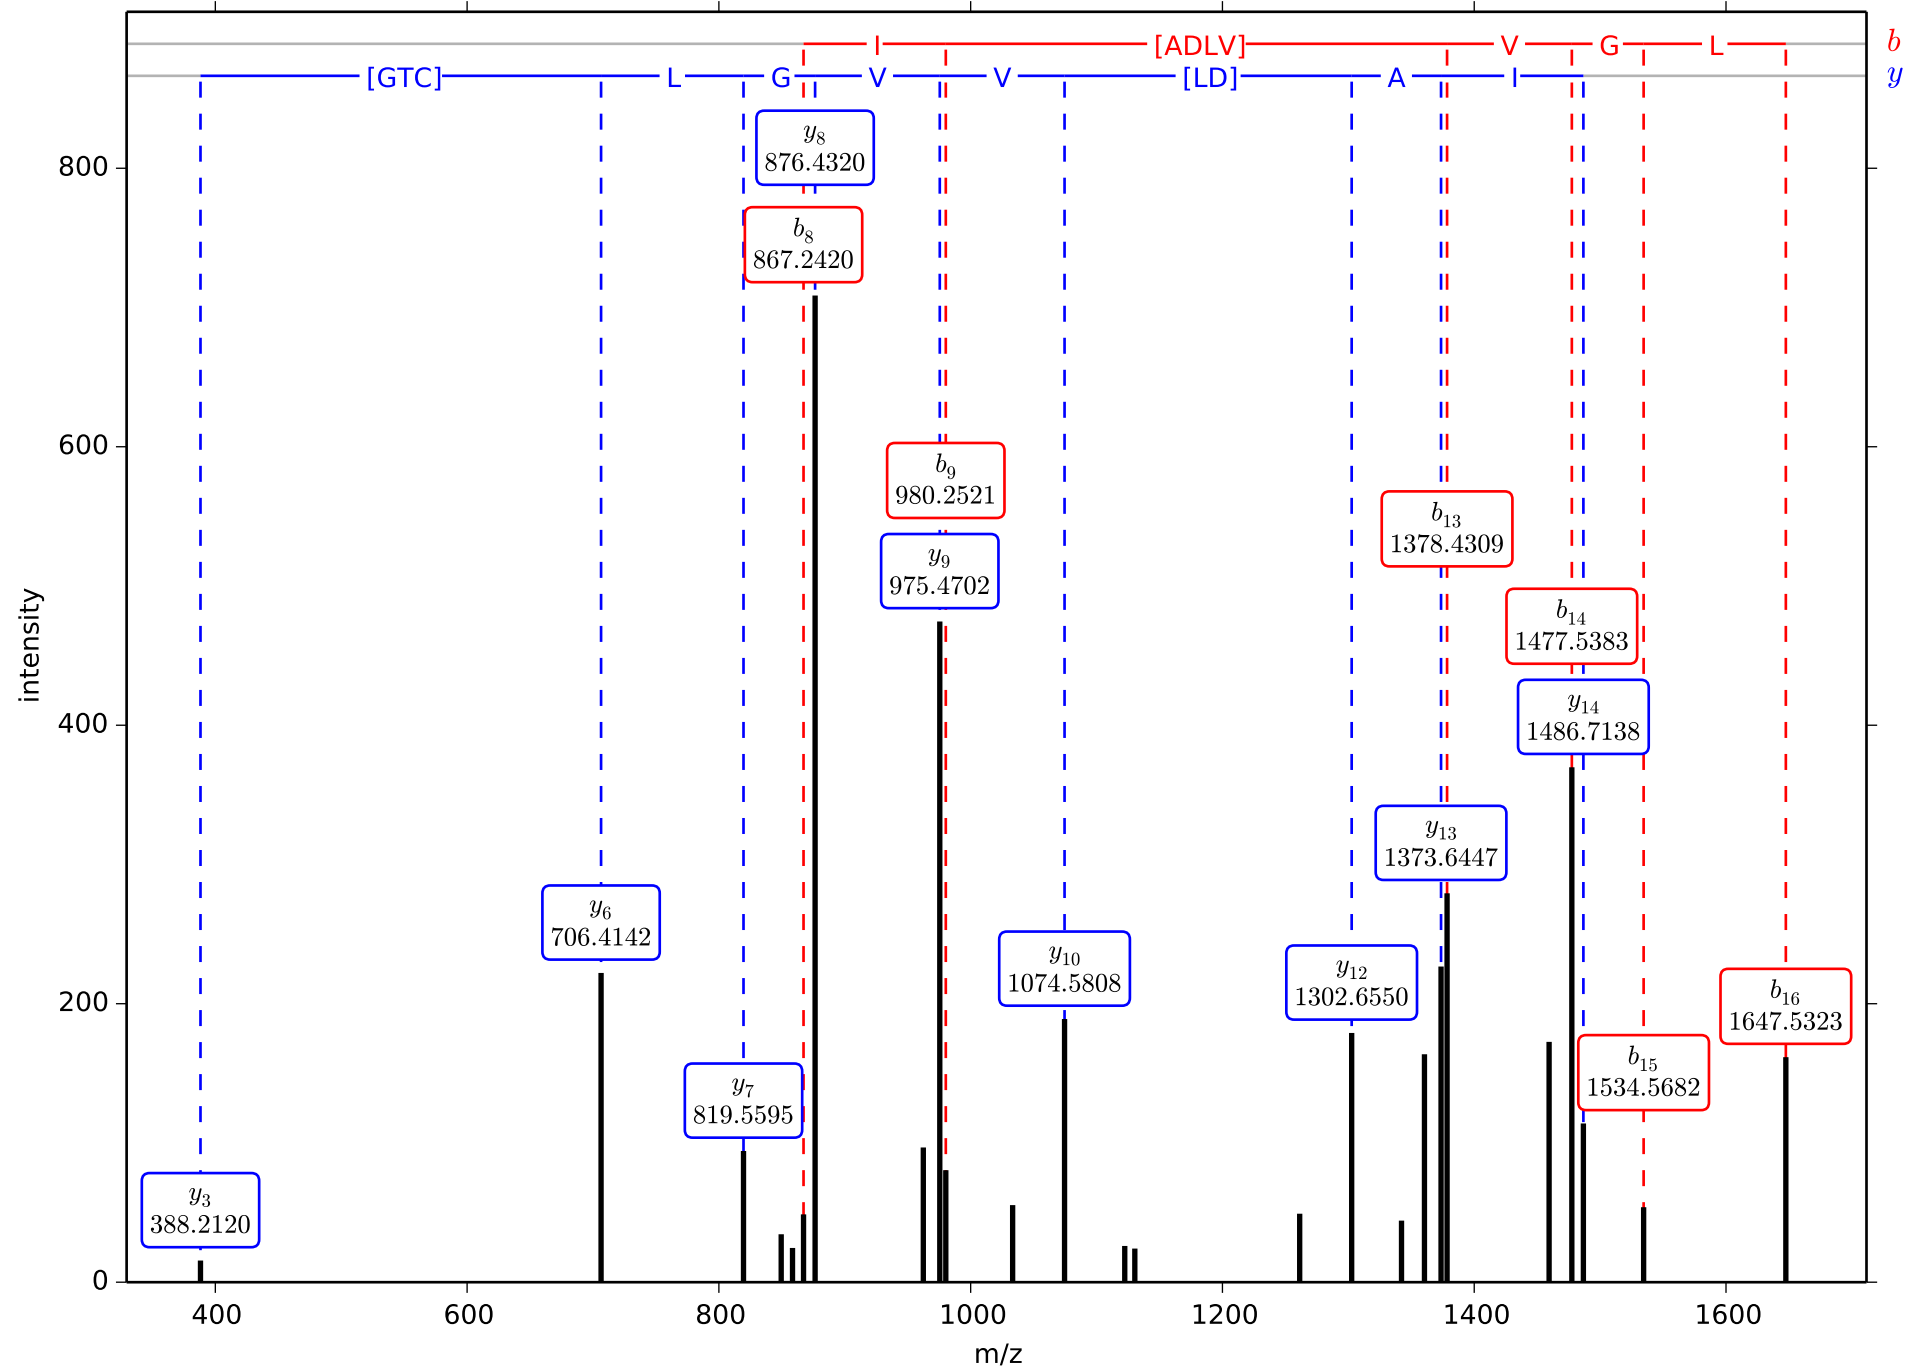

P21550 : ACNCLLLK

parent: 496.262400,2+

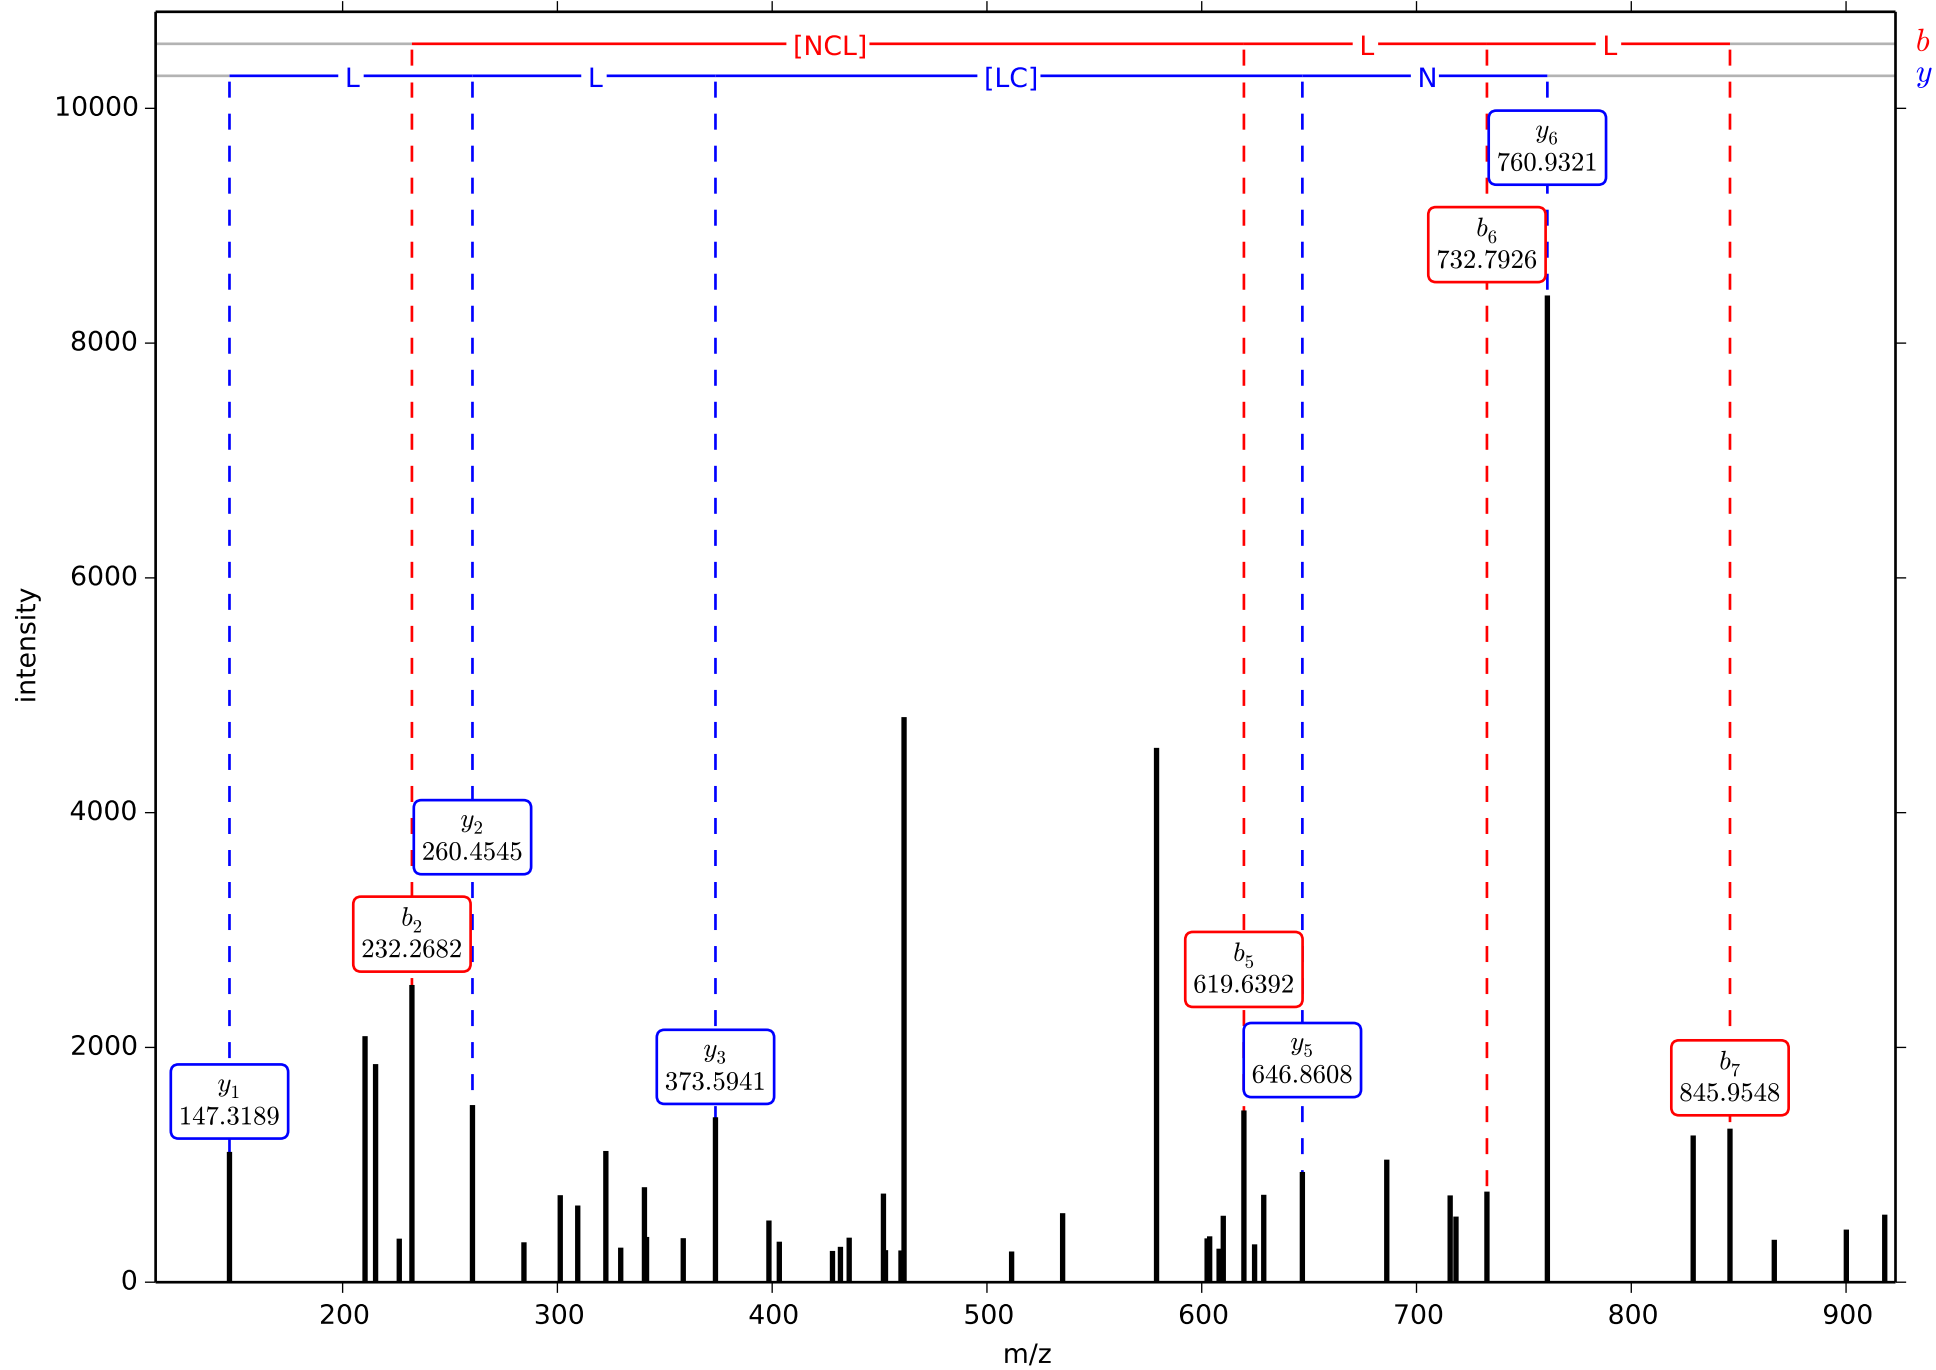

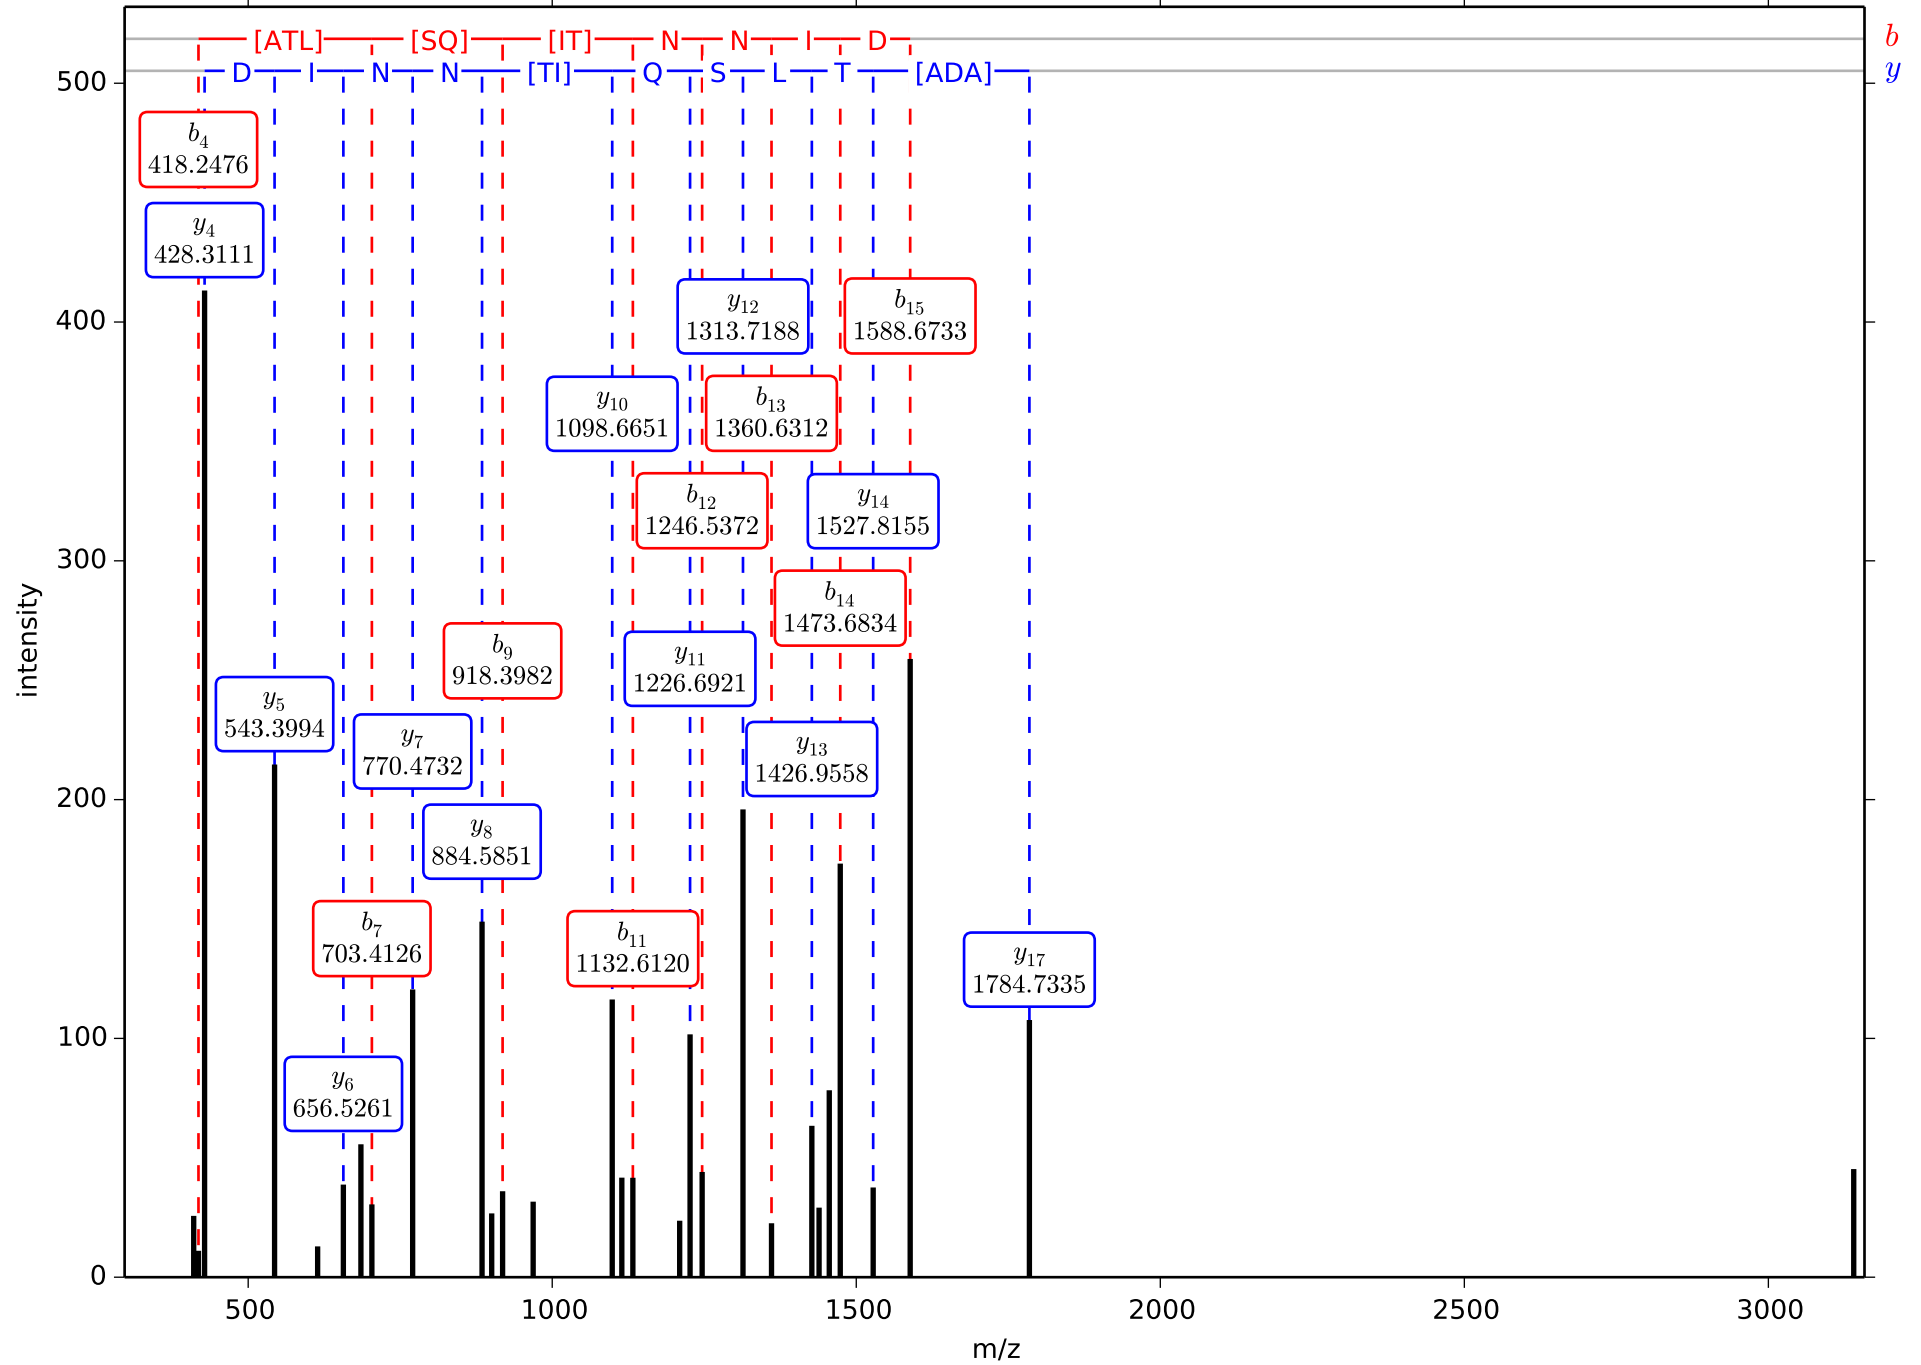

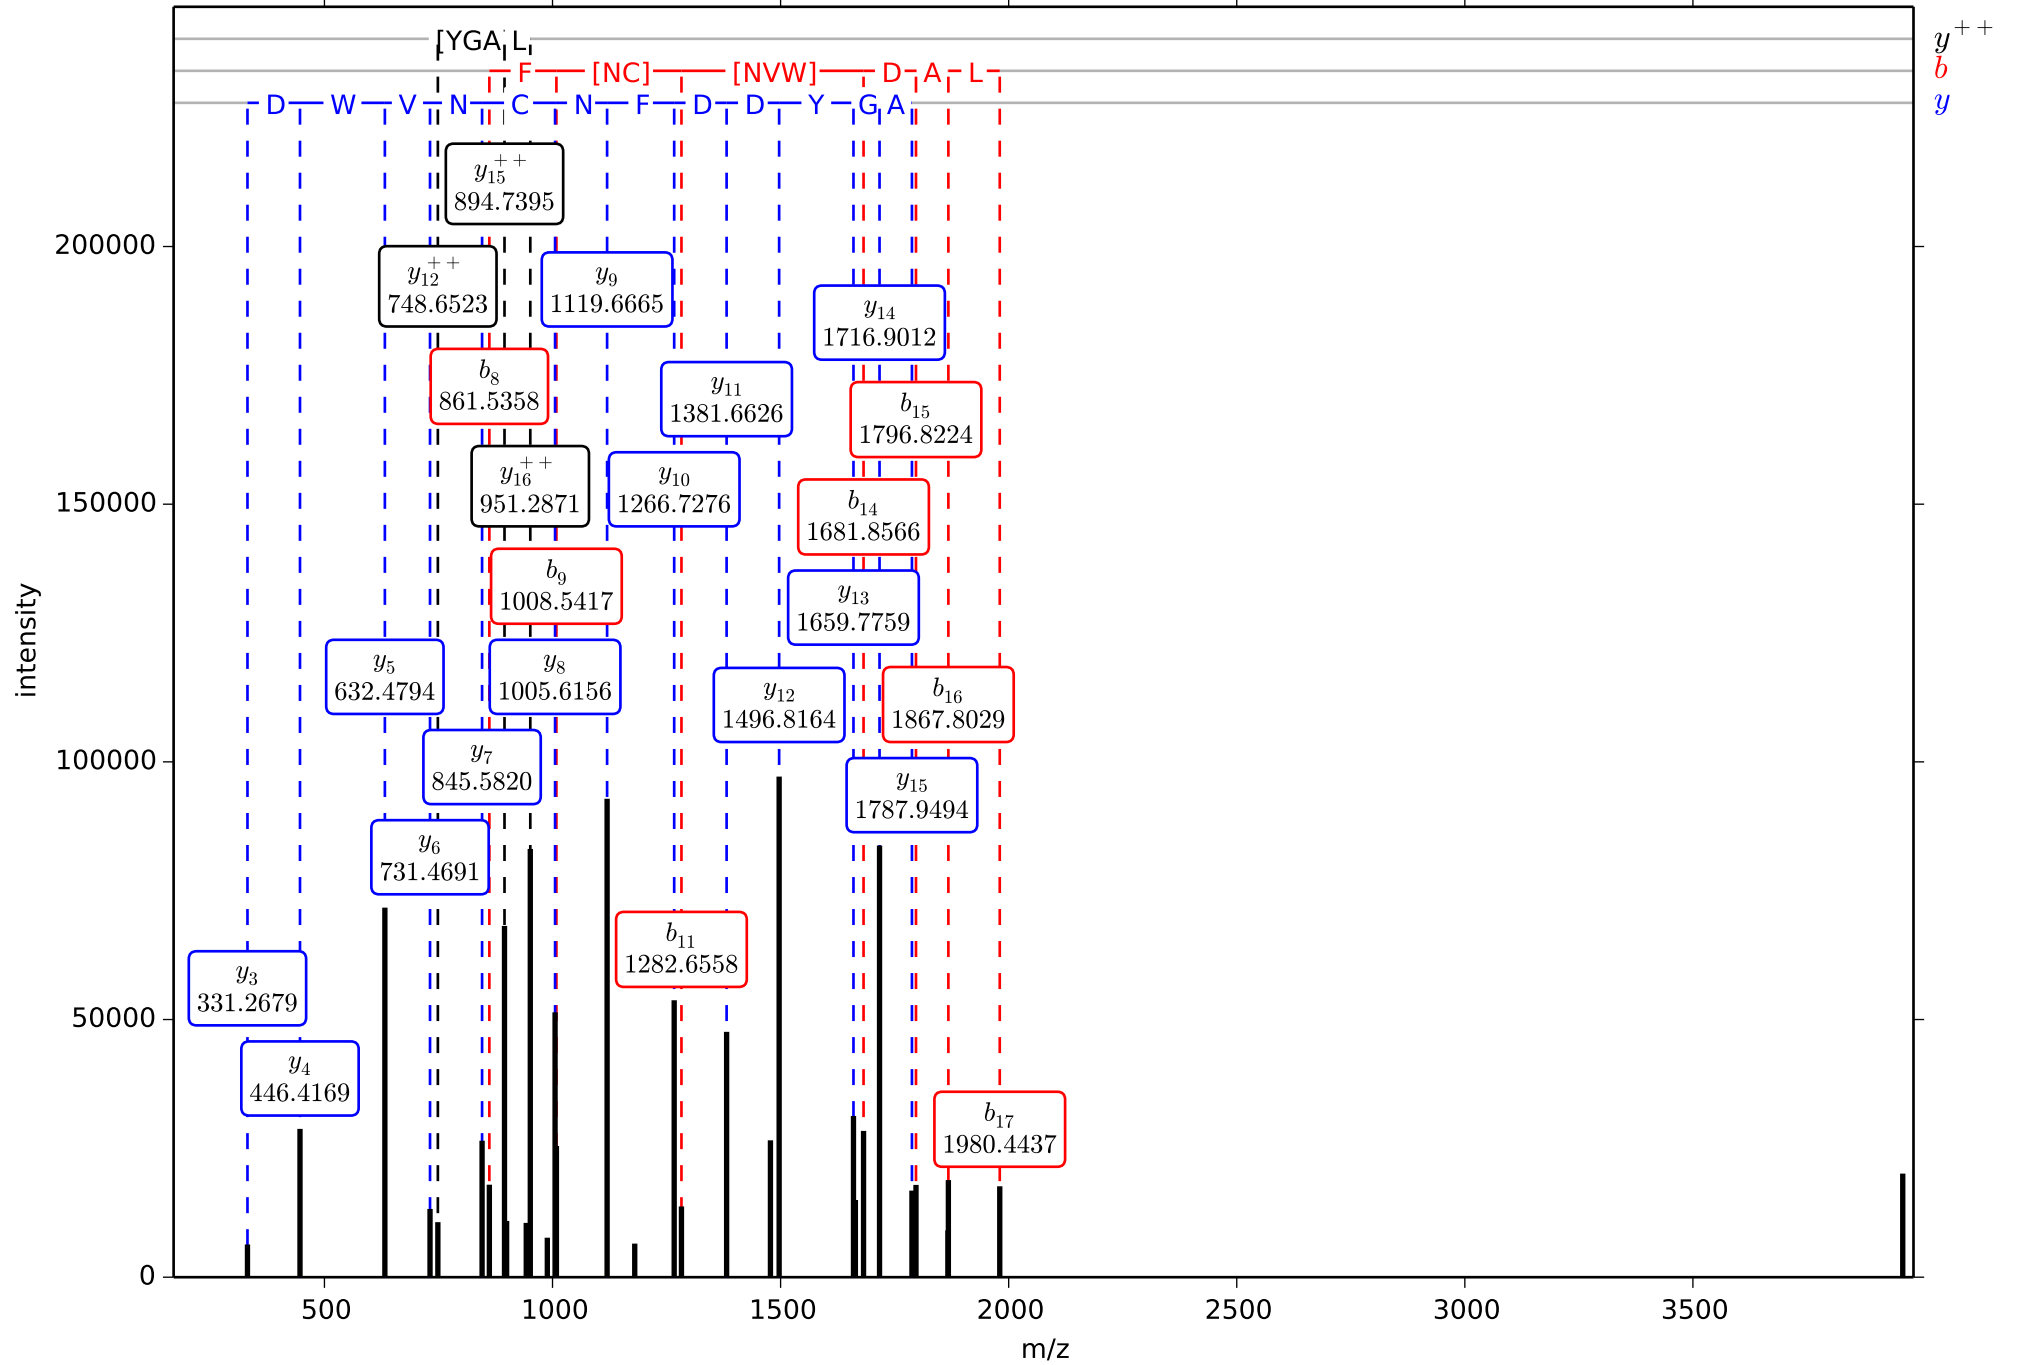



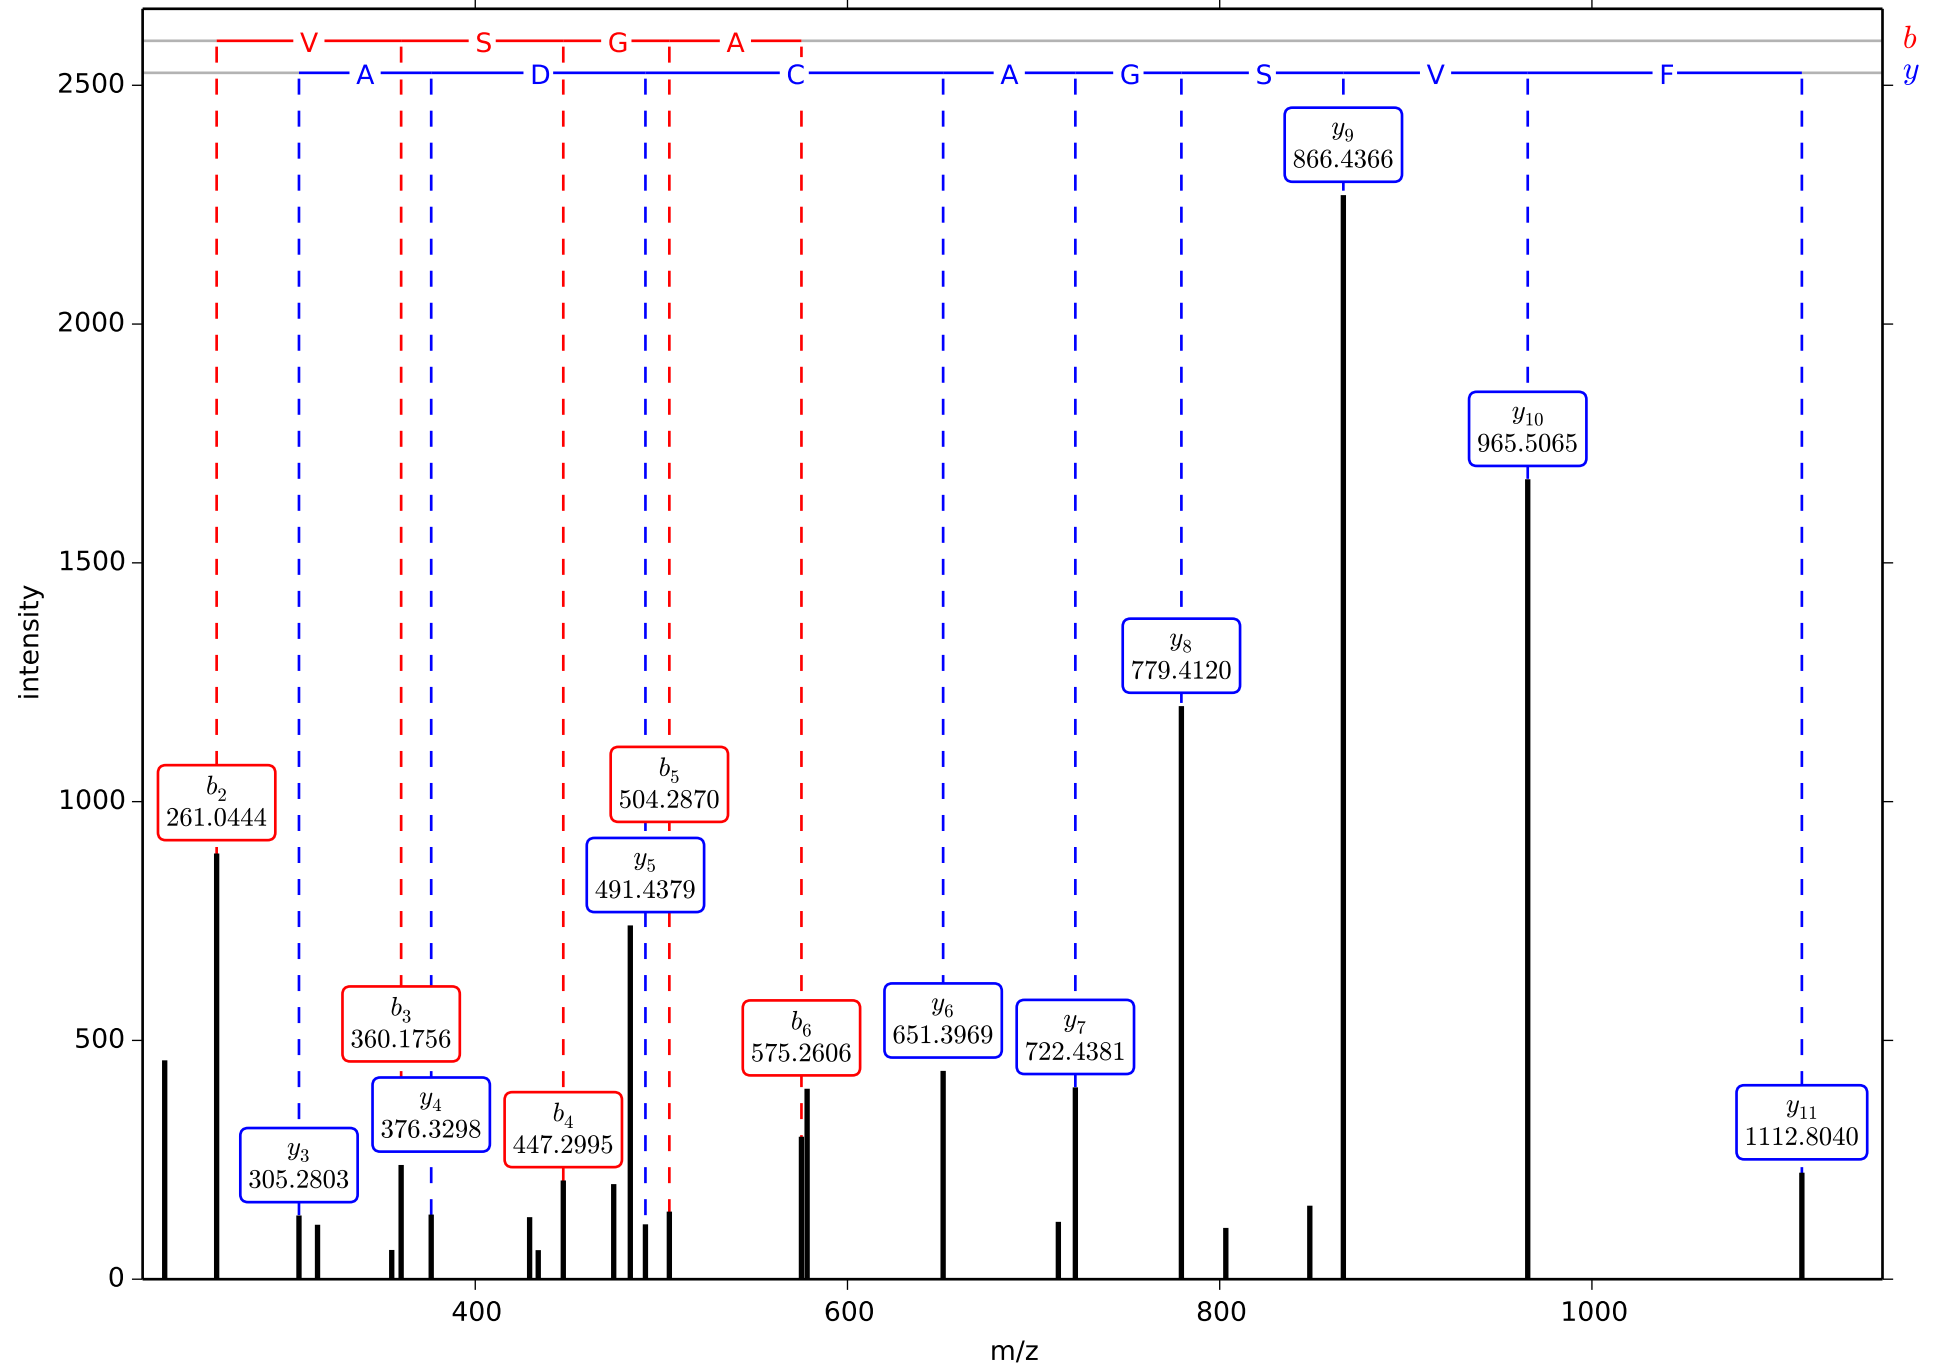

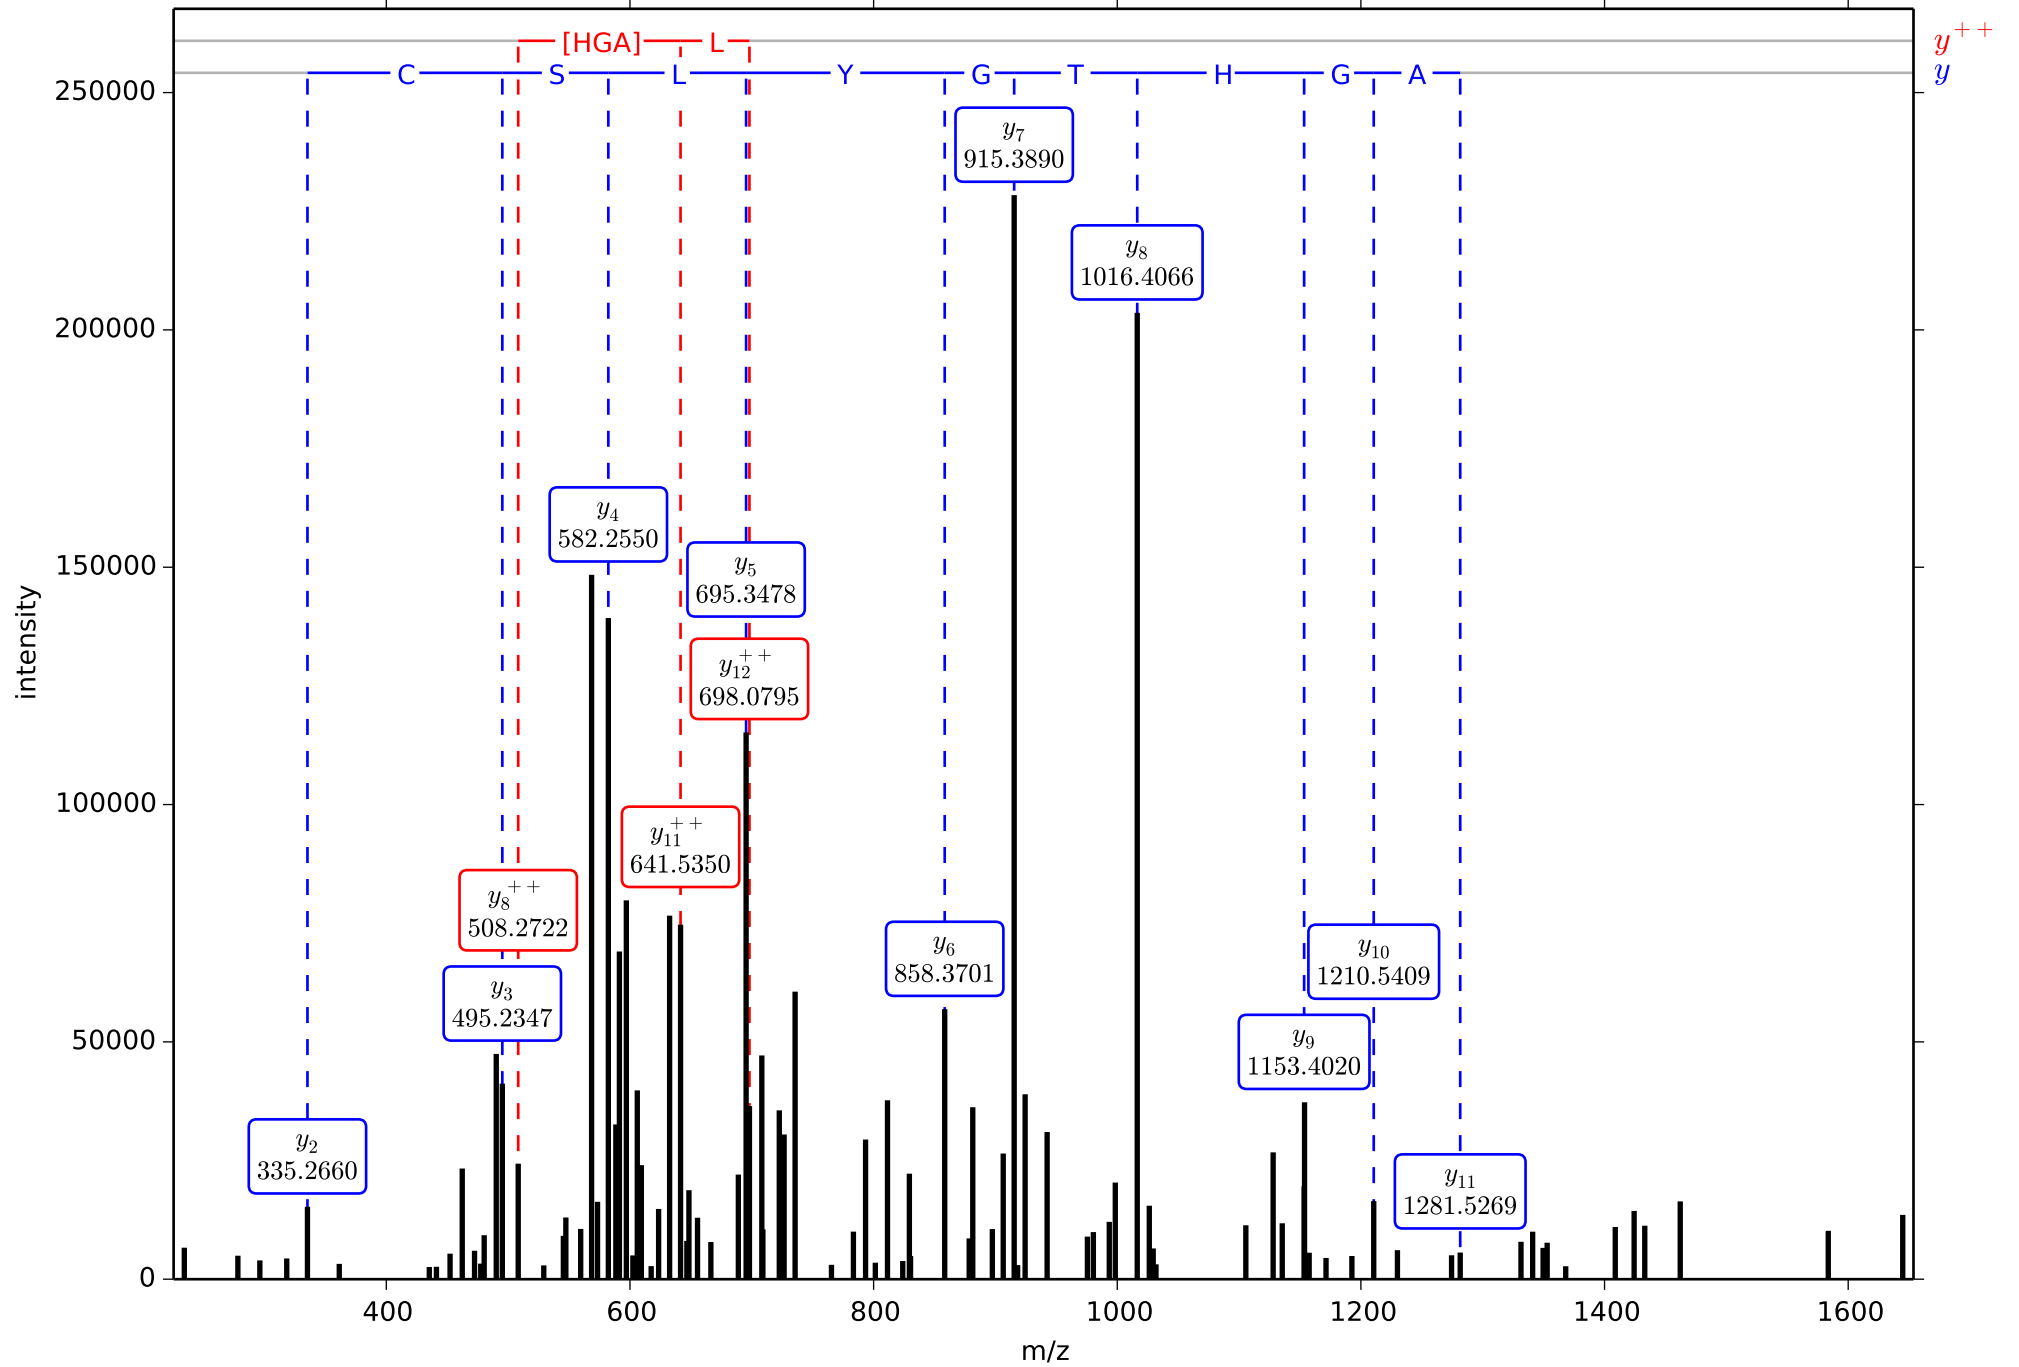

P62874 : LLAGYDDFNCNVWDALKADR

parent: 823.740410,3+

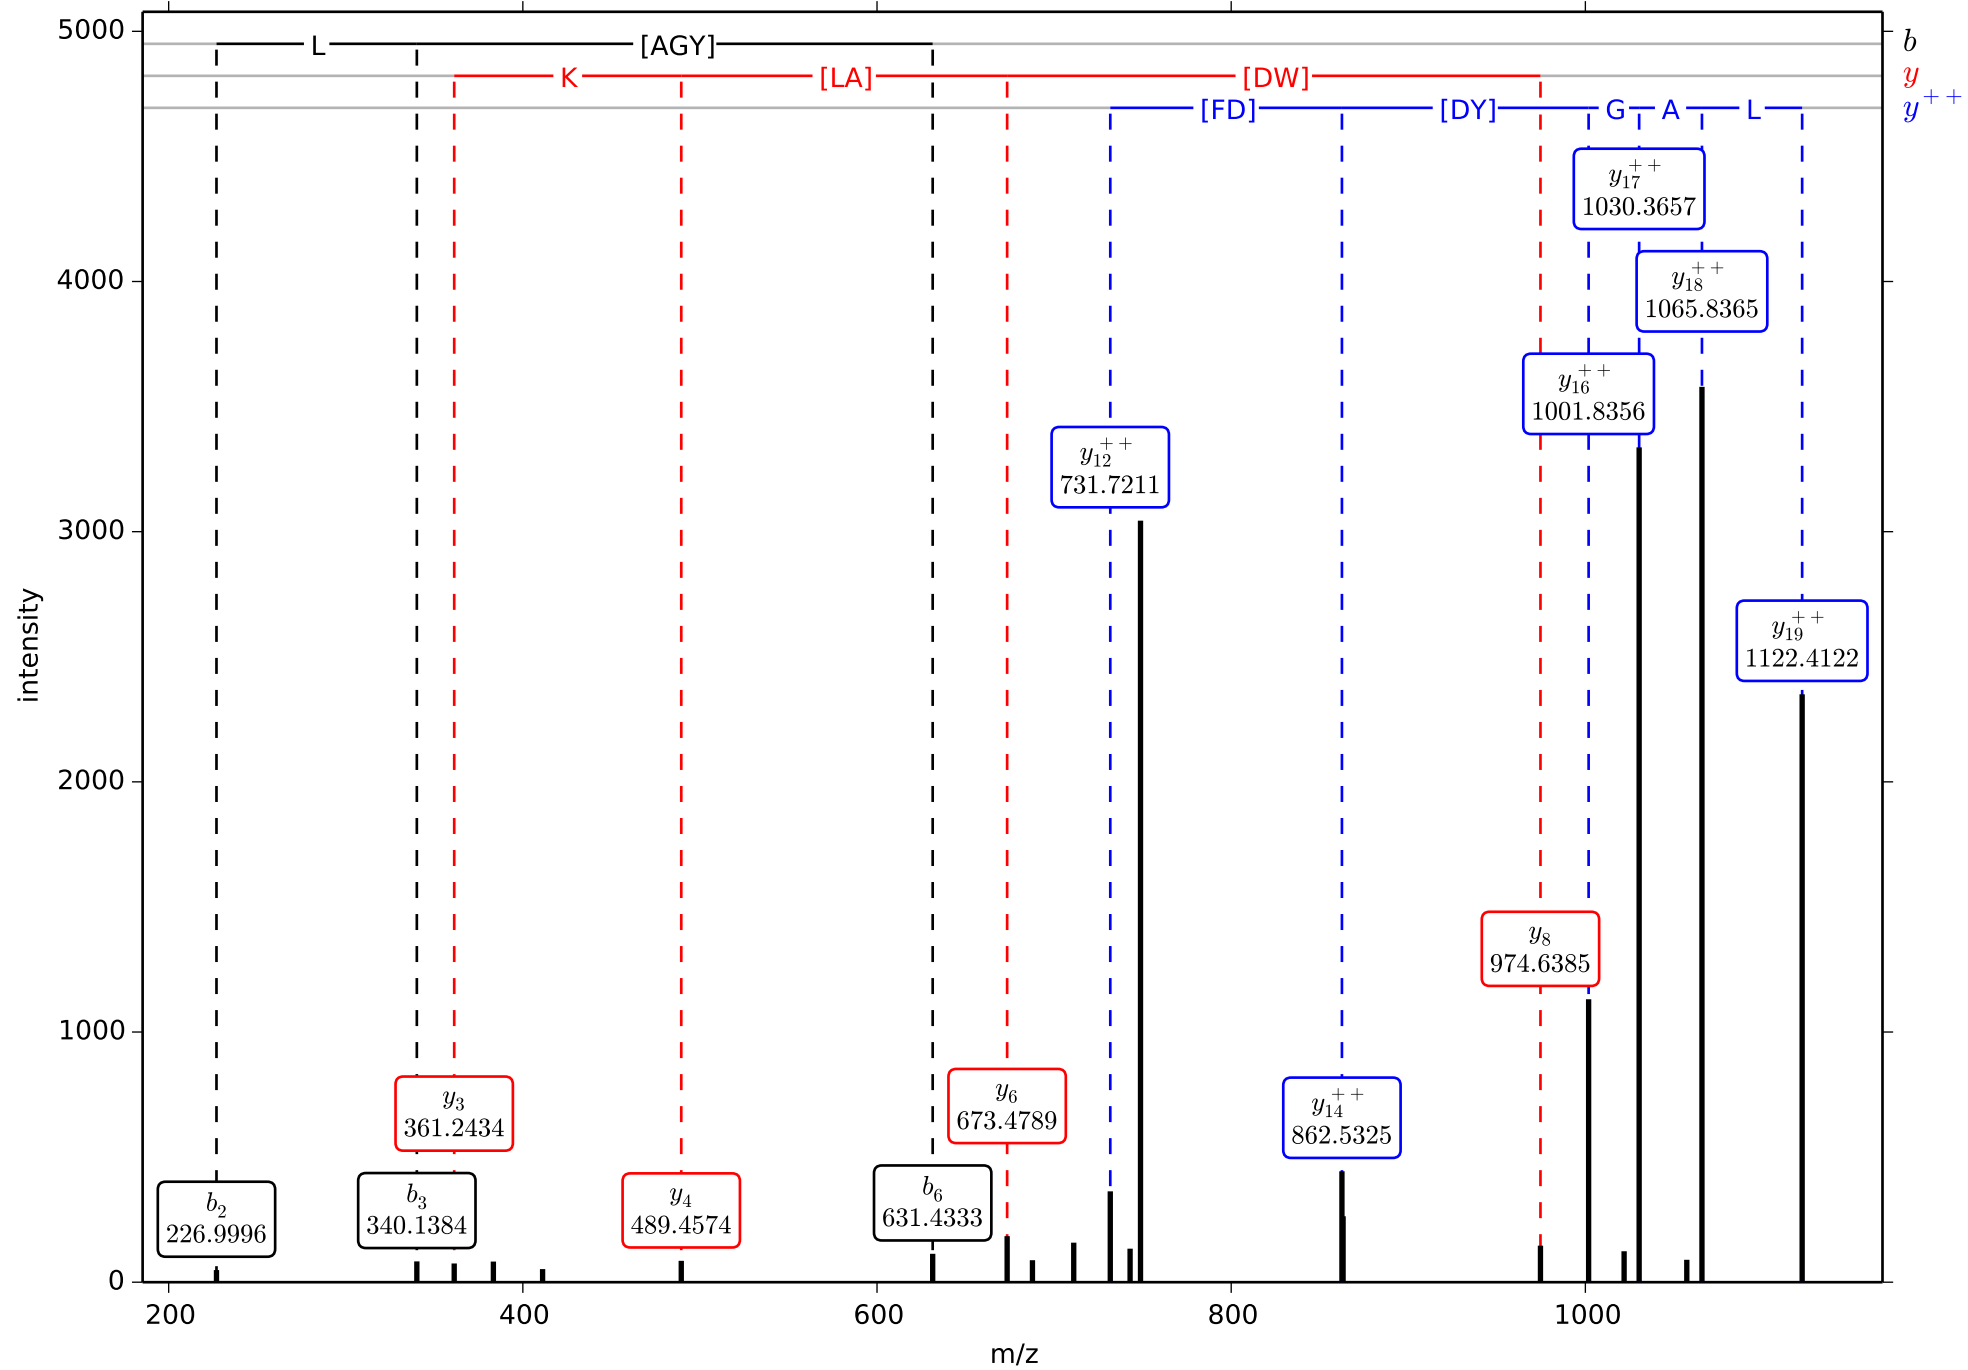

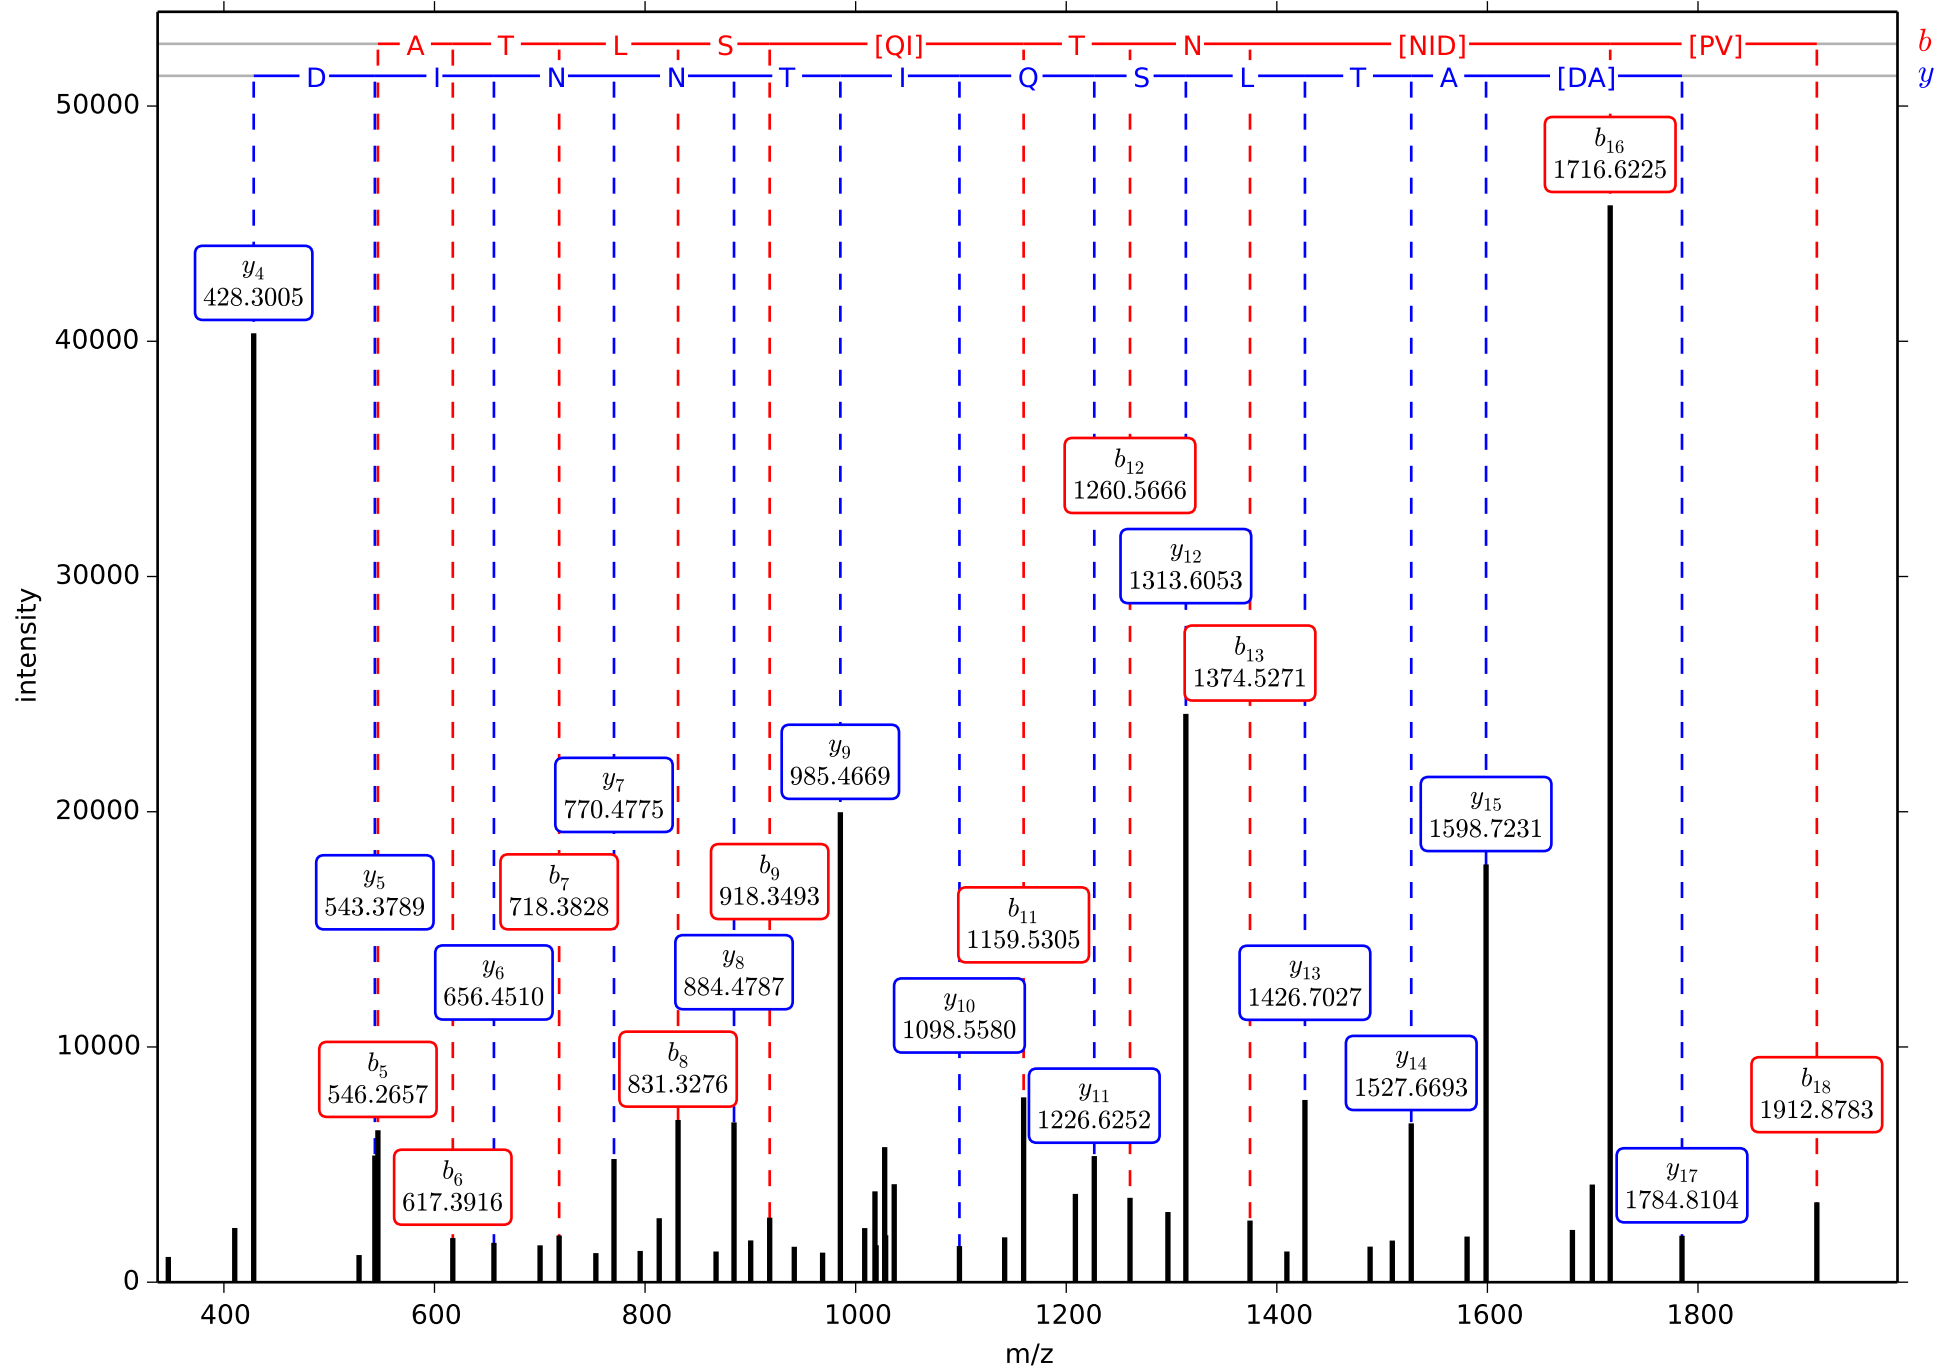

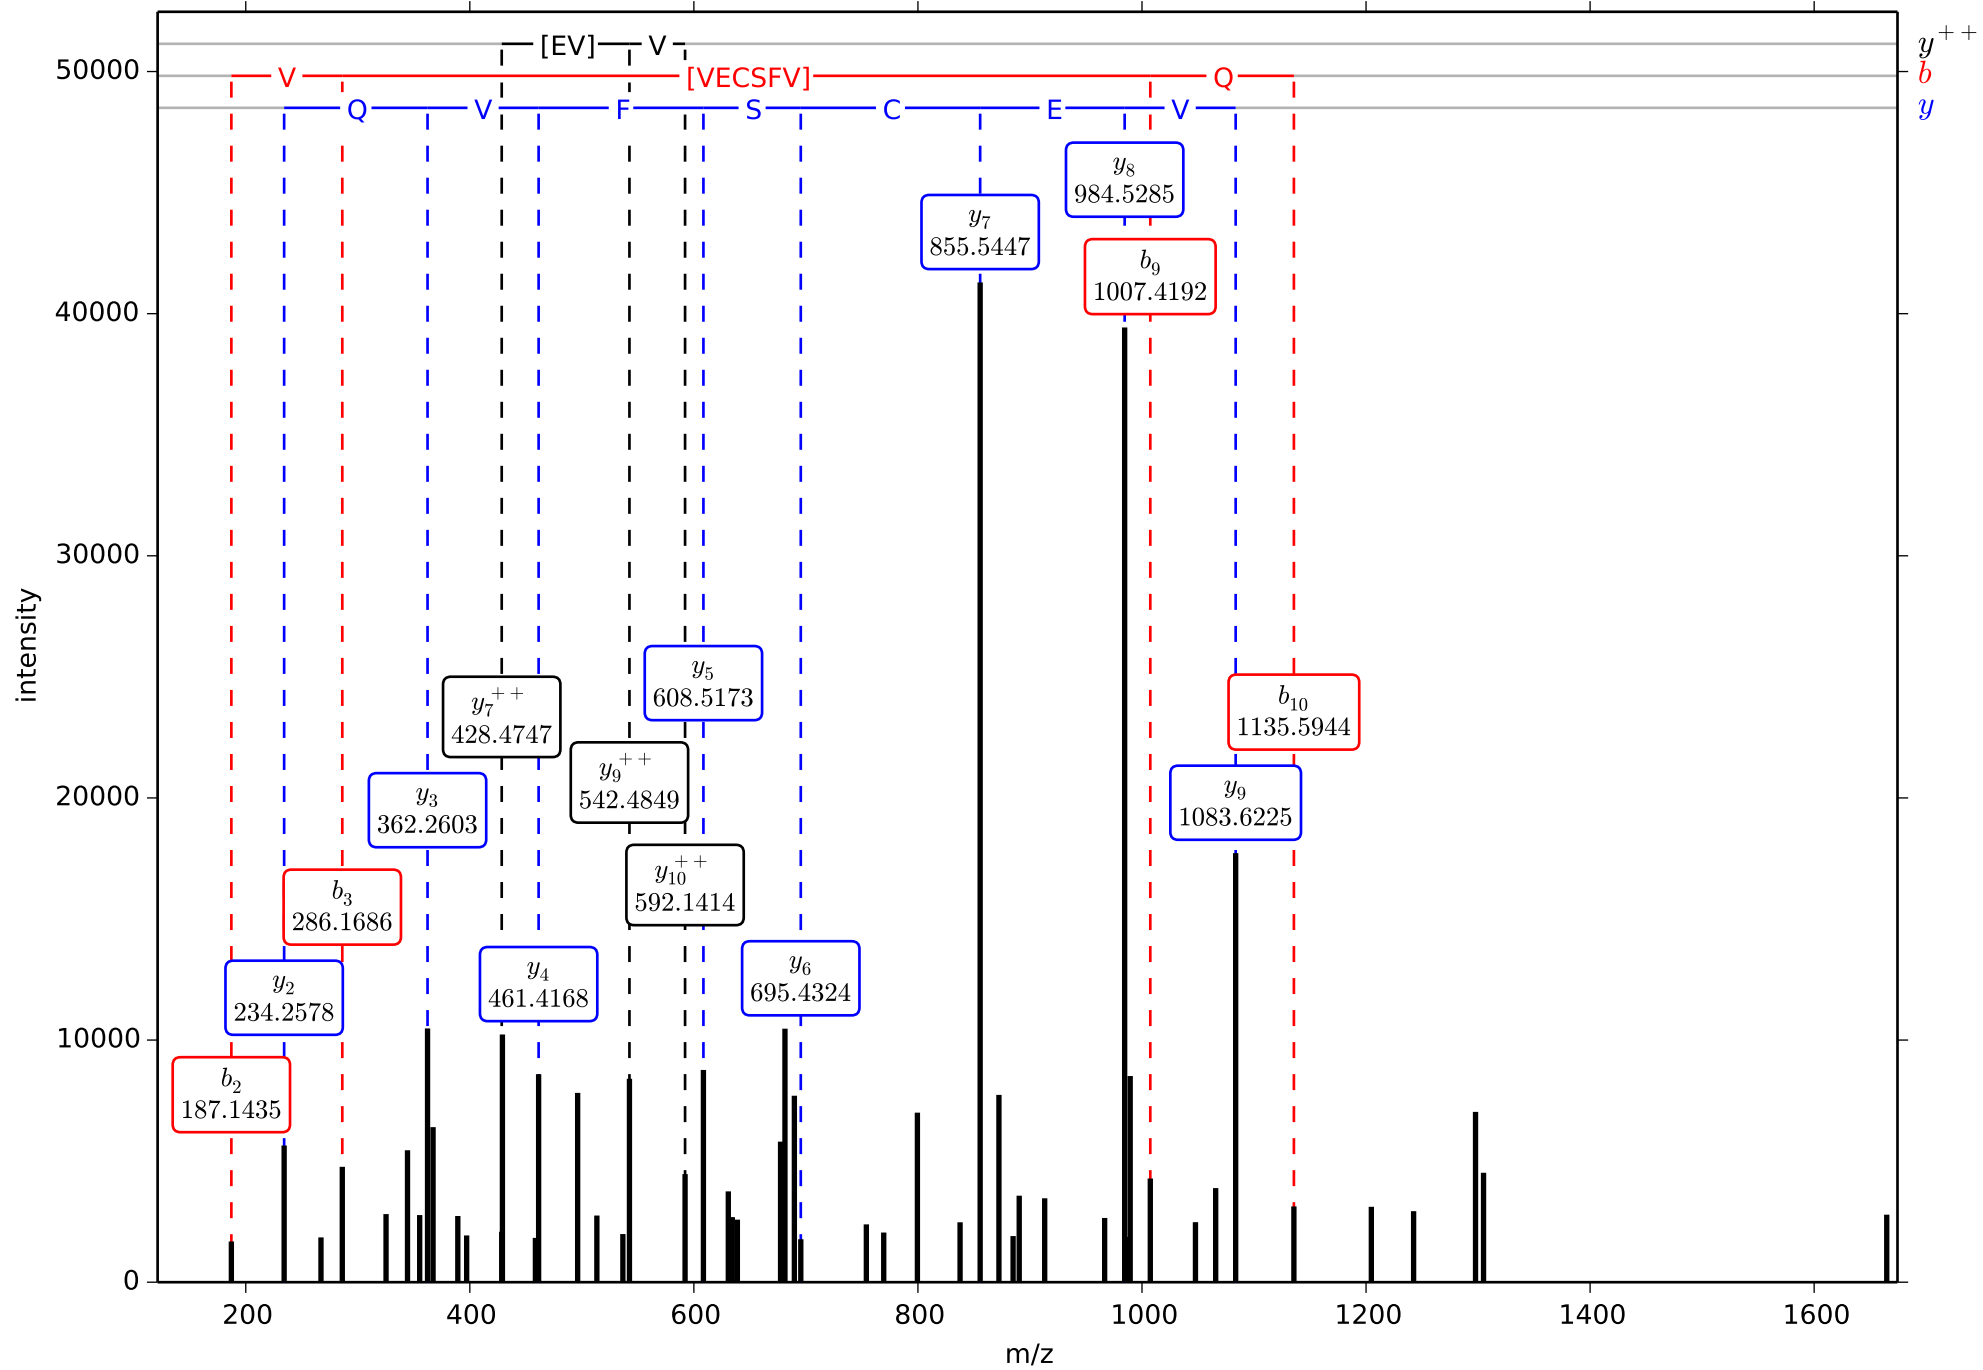

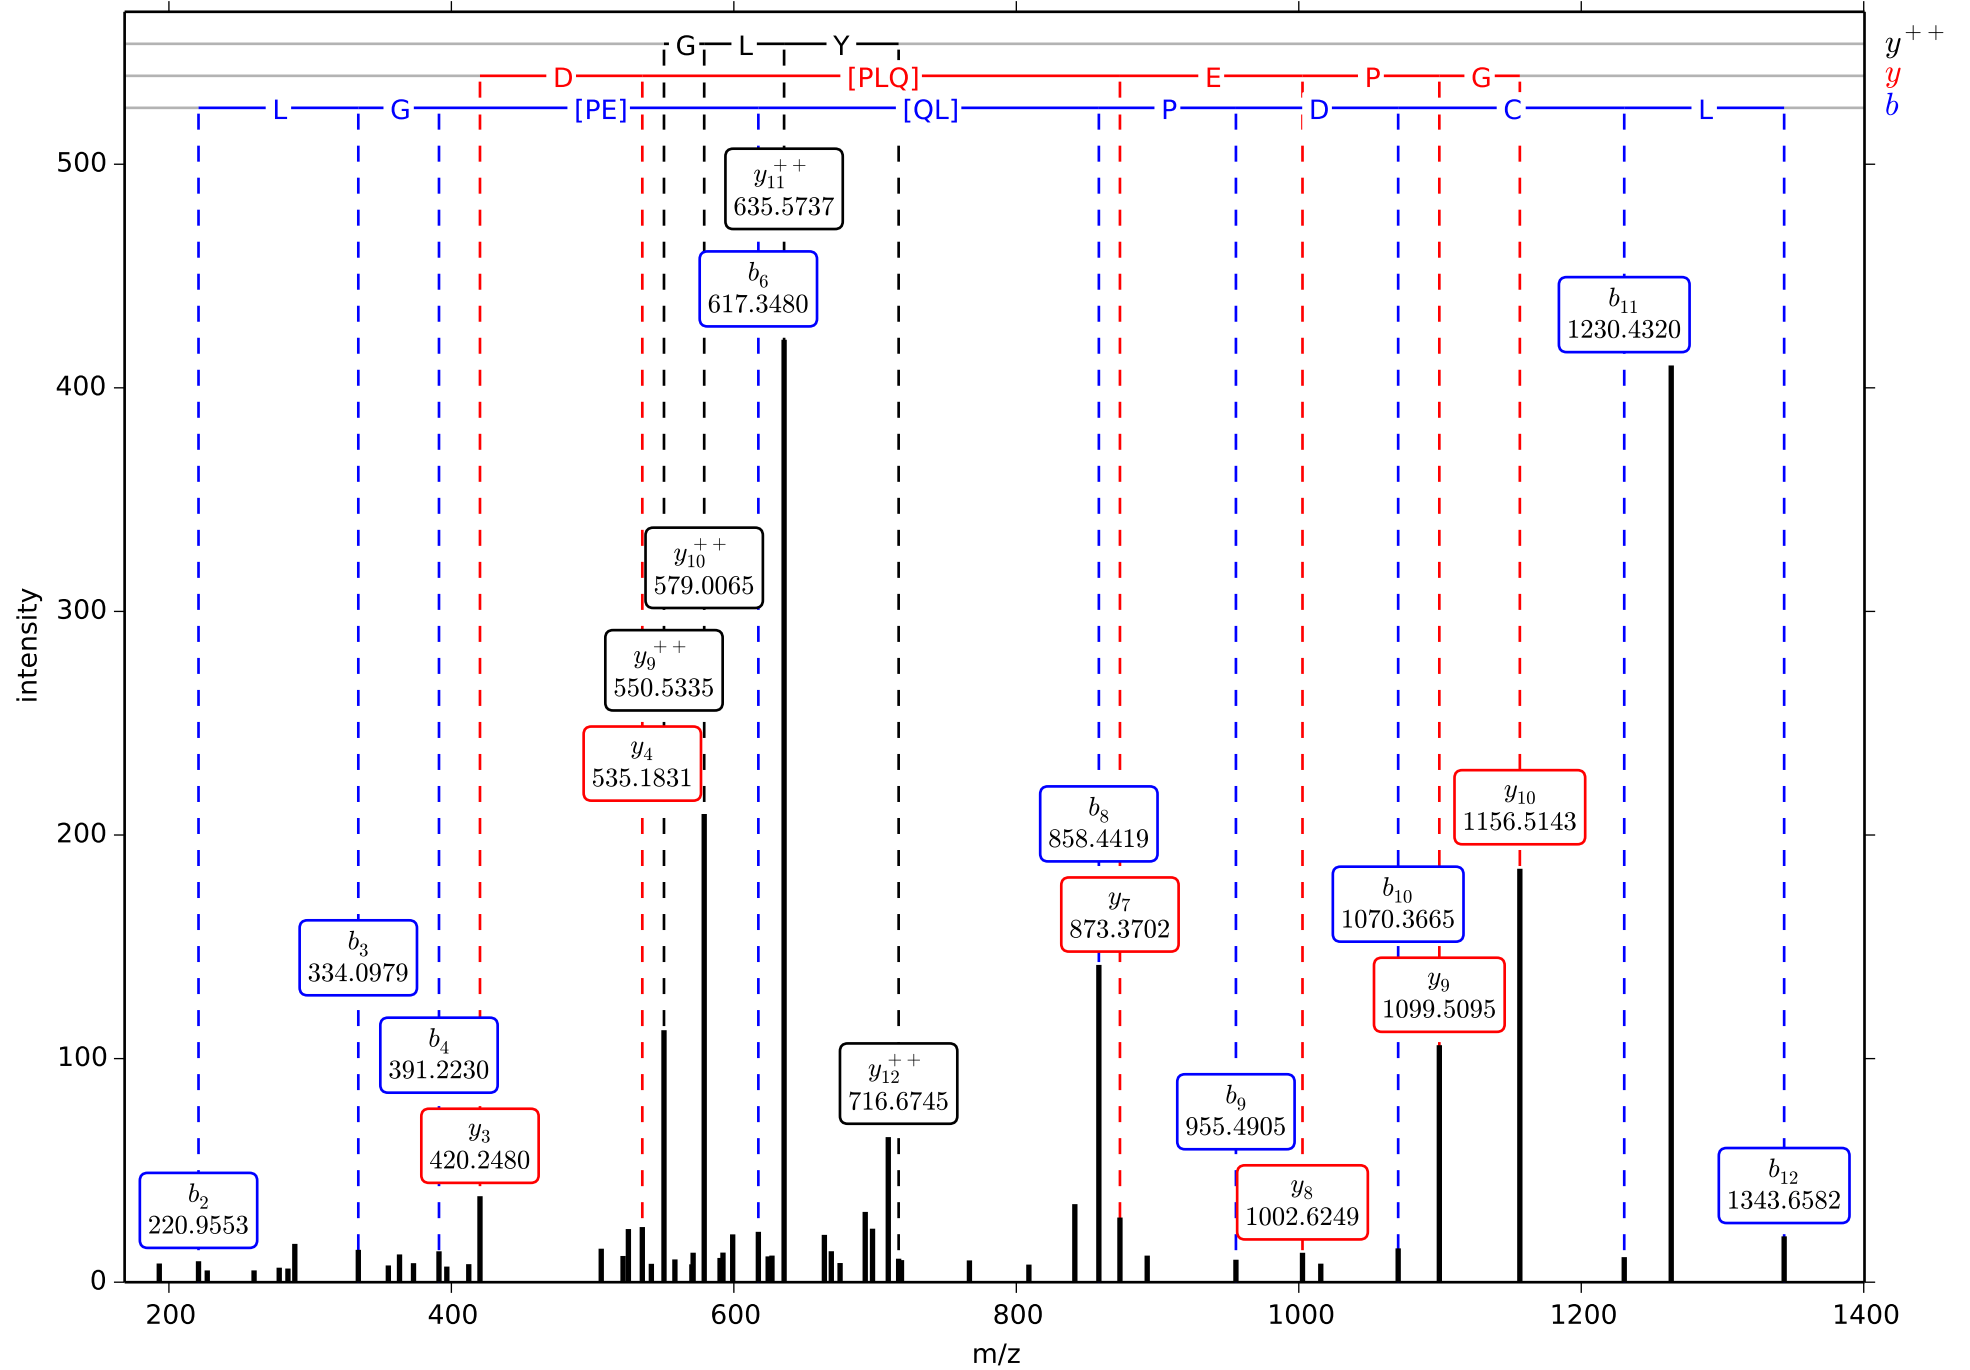

P08249 : ETECTYFSTPLLLGKK

parent: 943.996010,2+

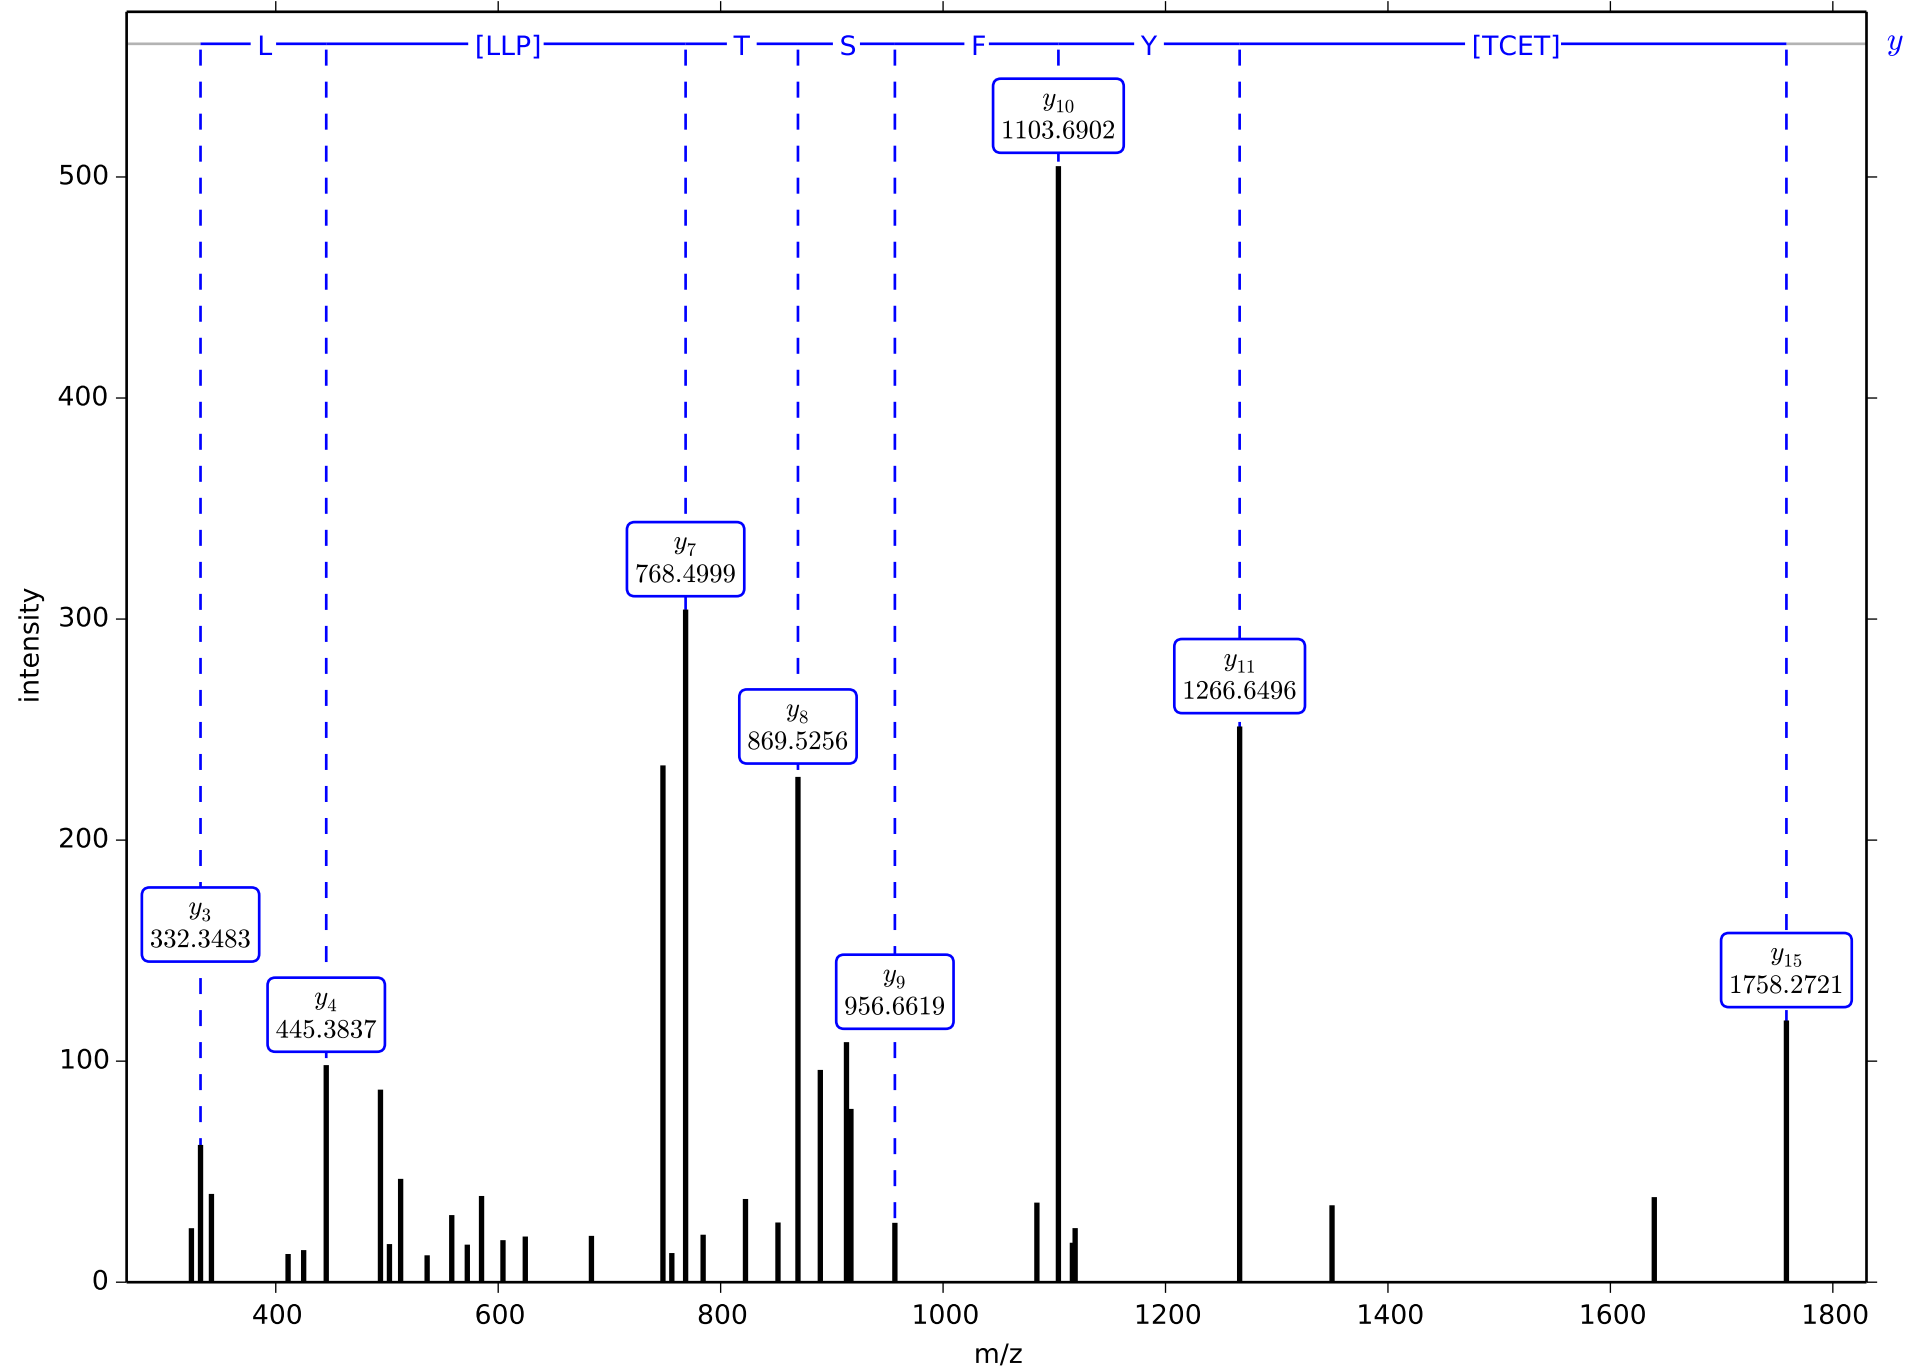

P08249 : TIIP LISQCTPK

parent: 685.892290,2+

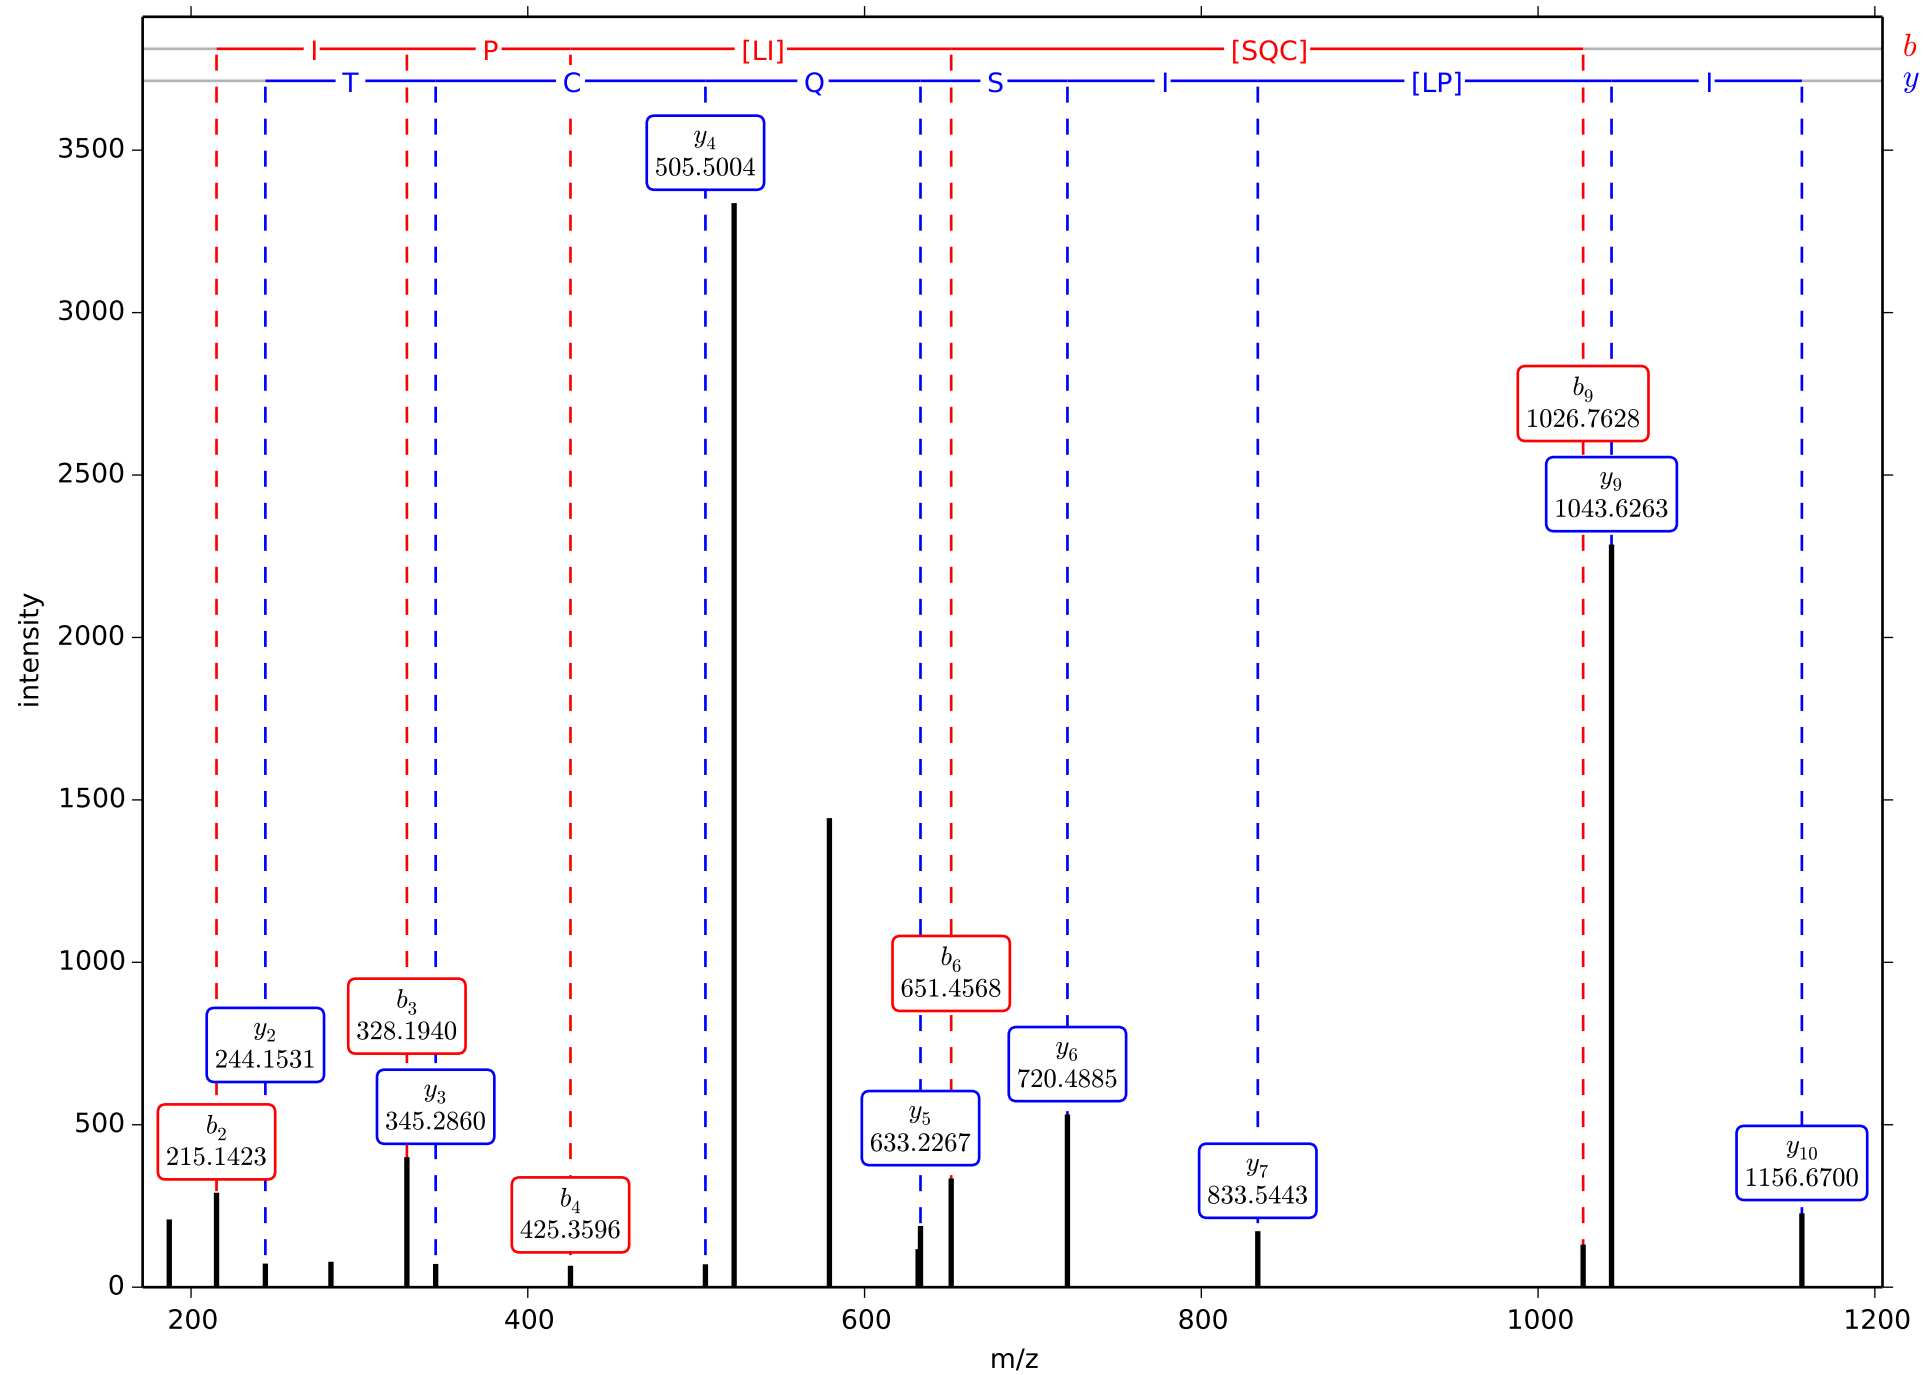



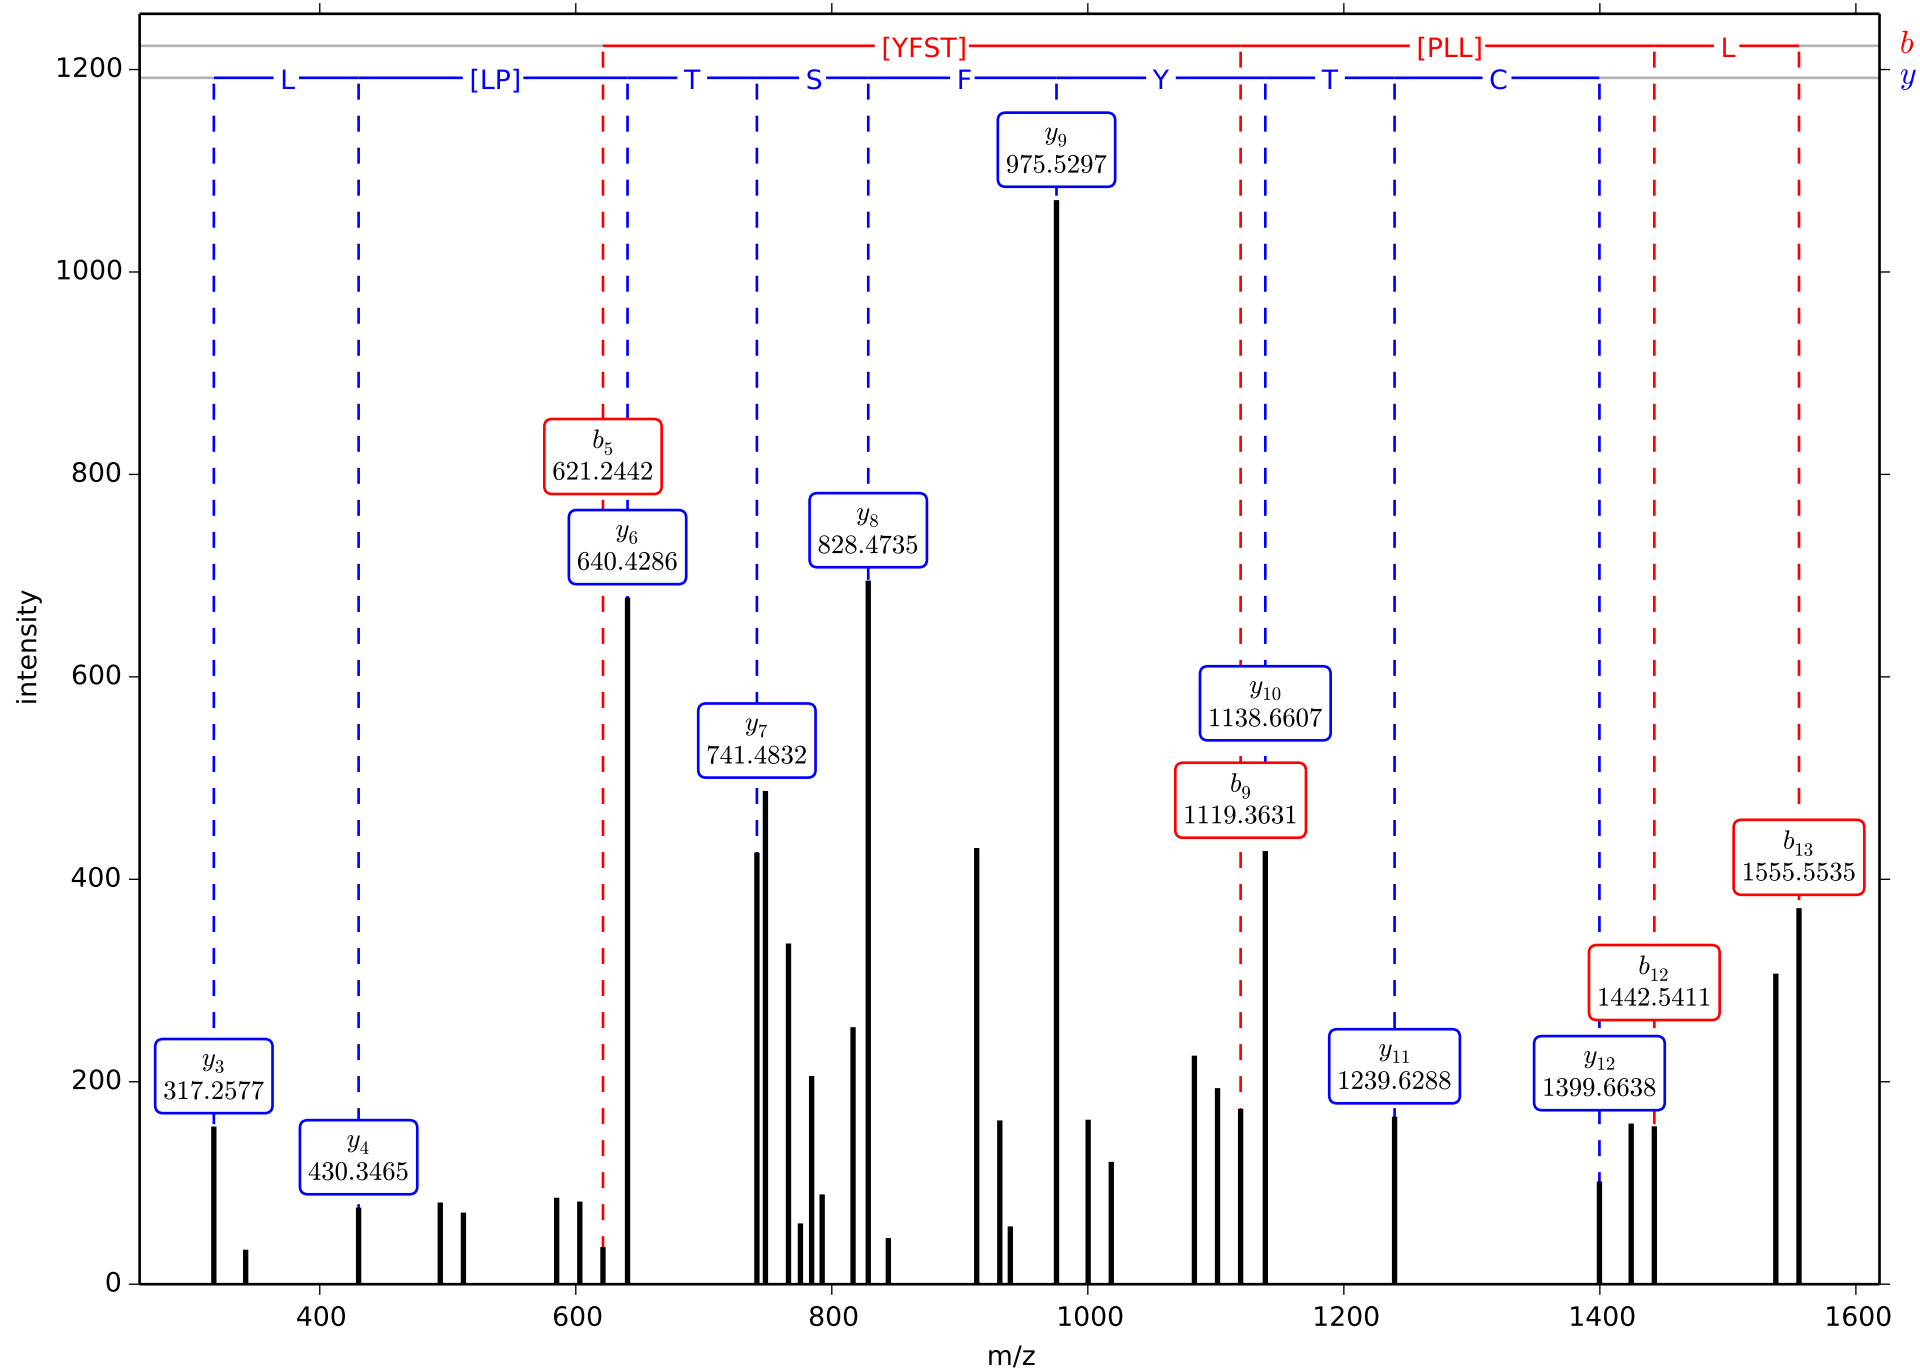

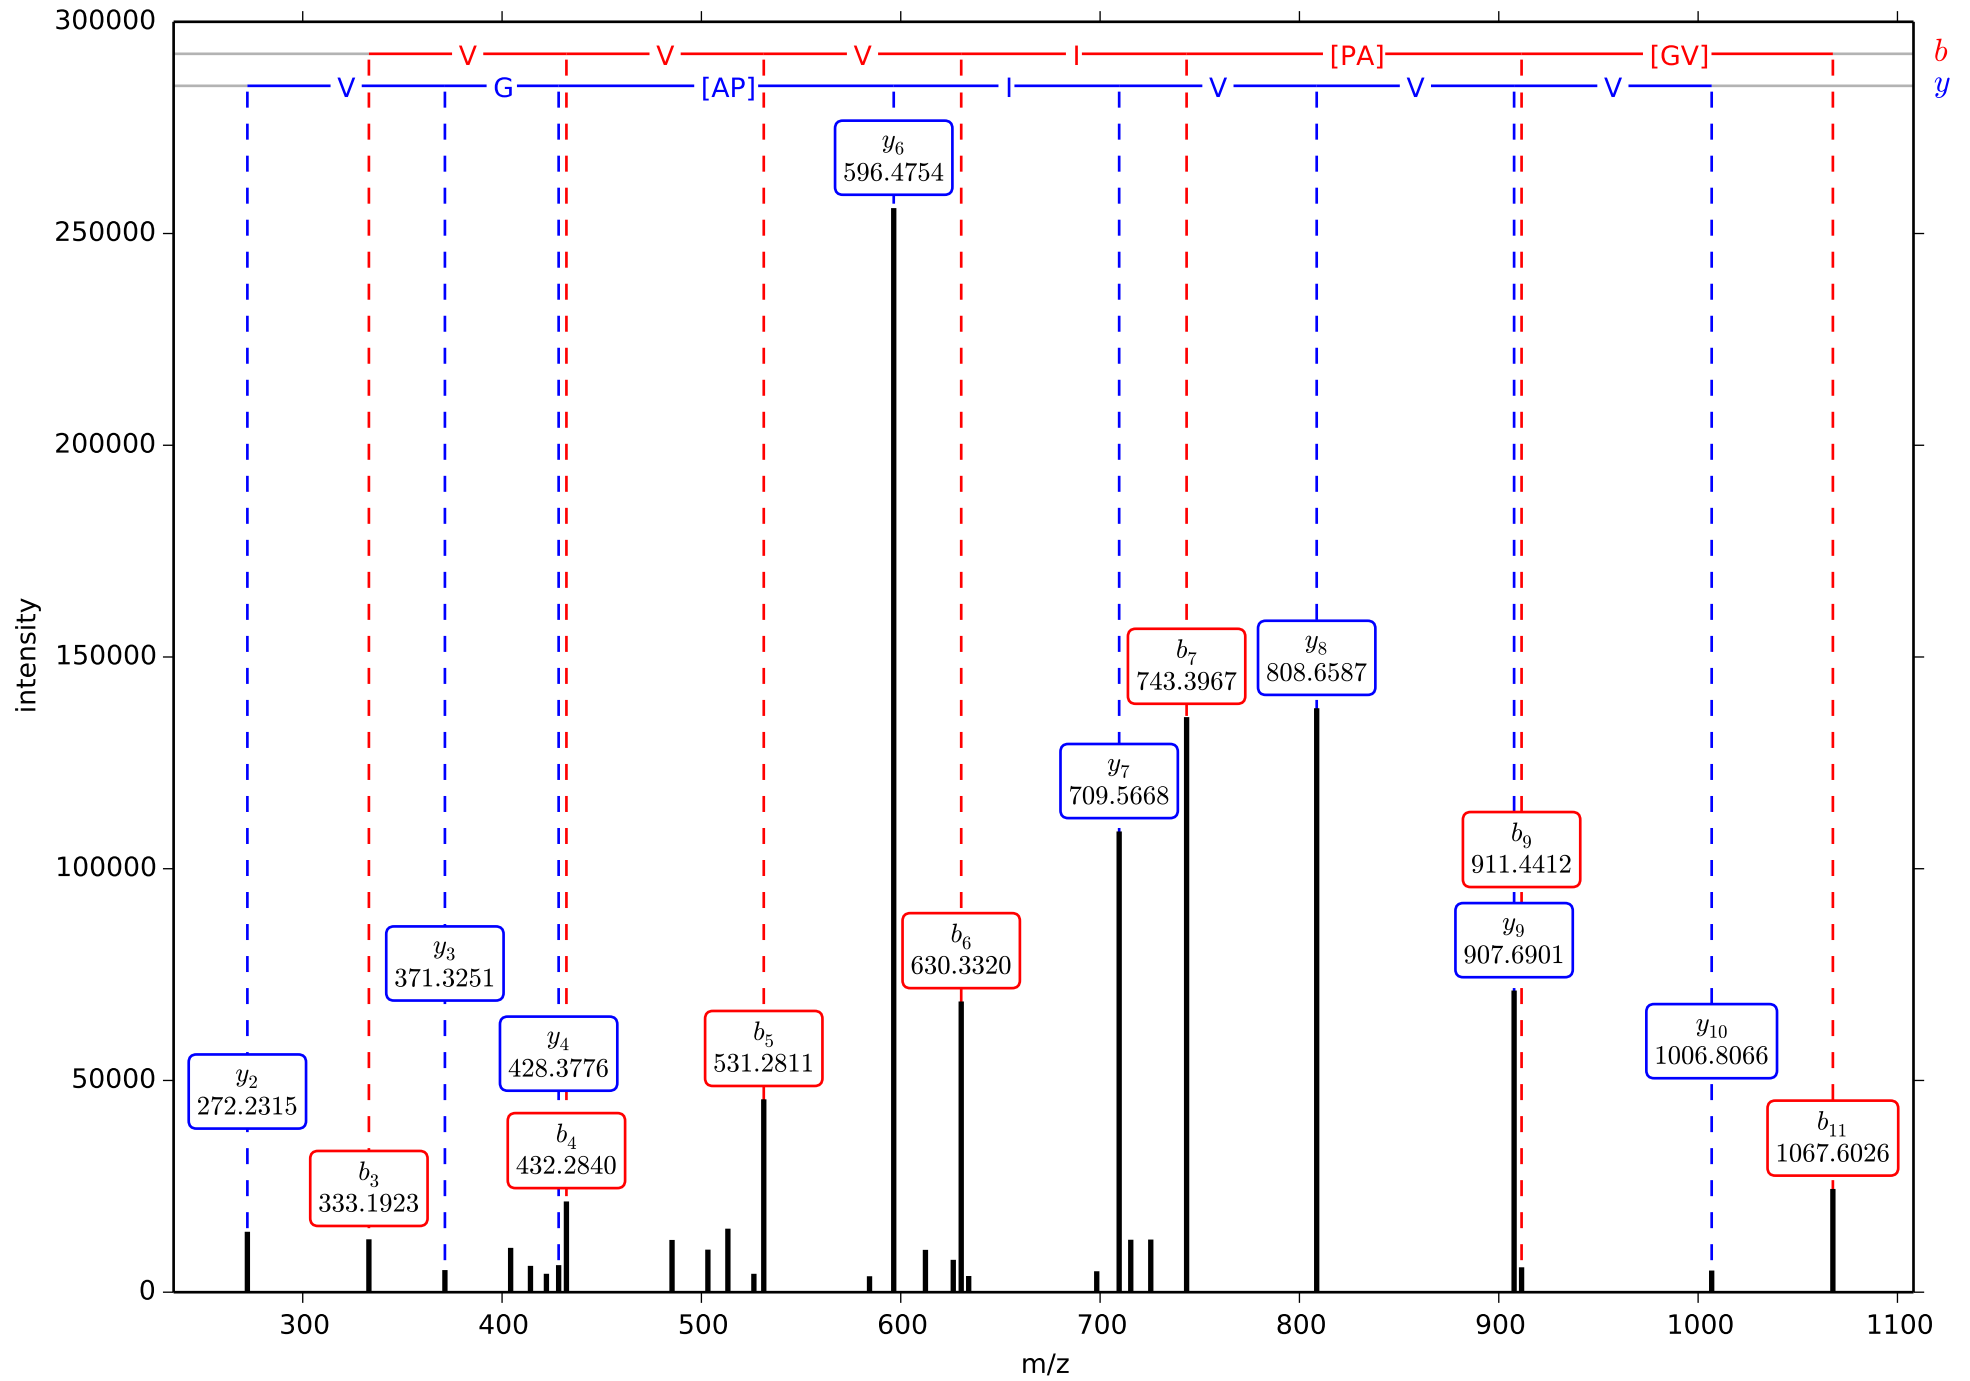

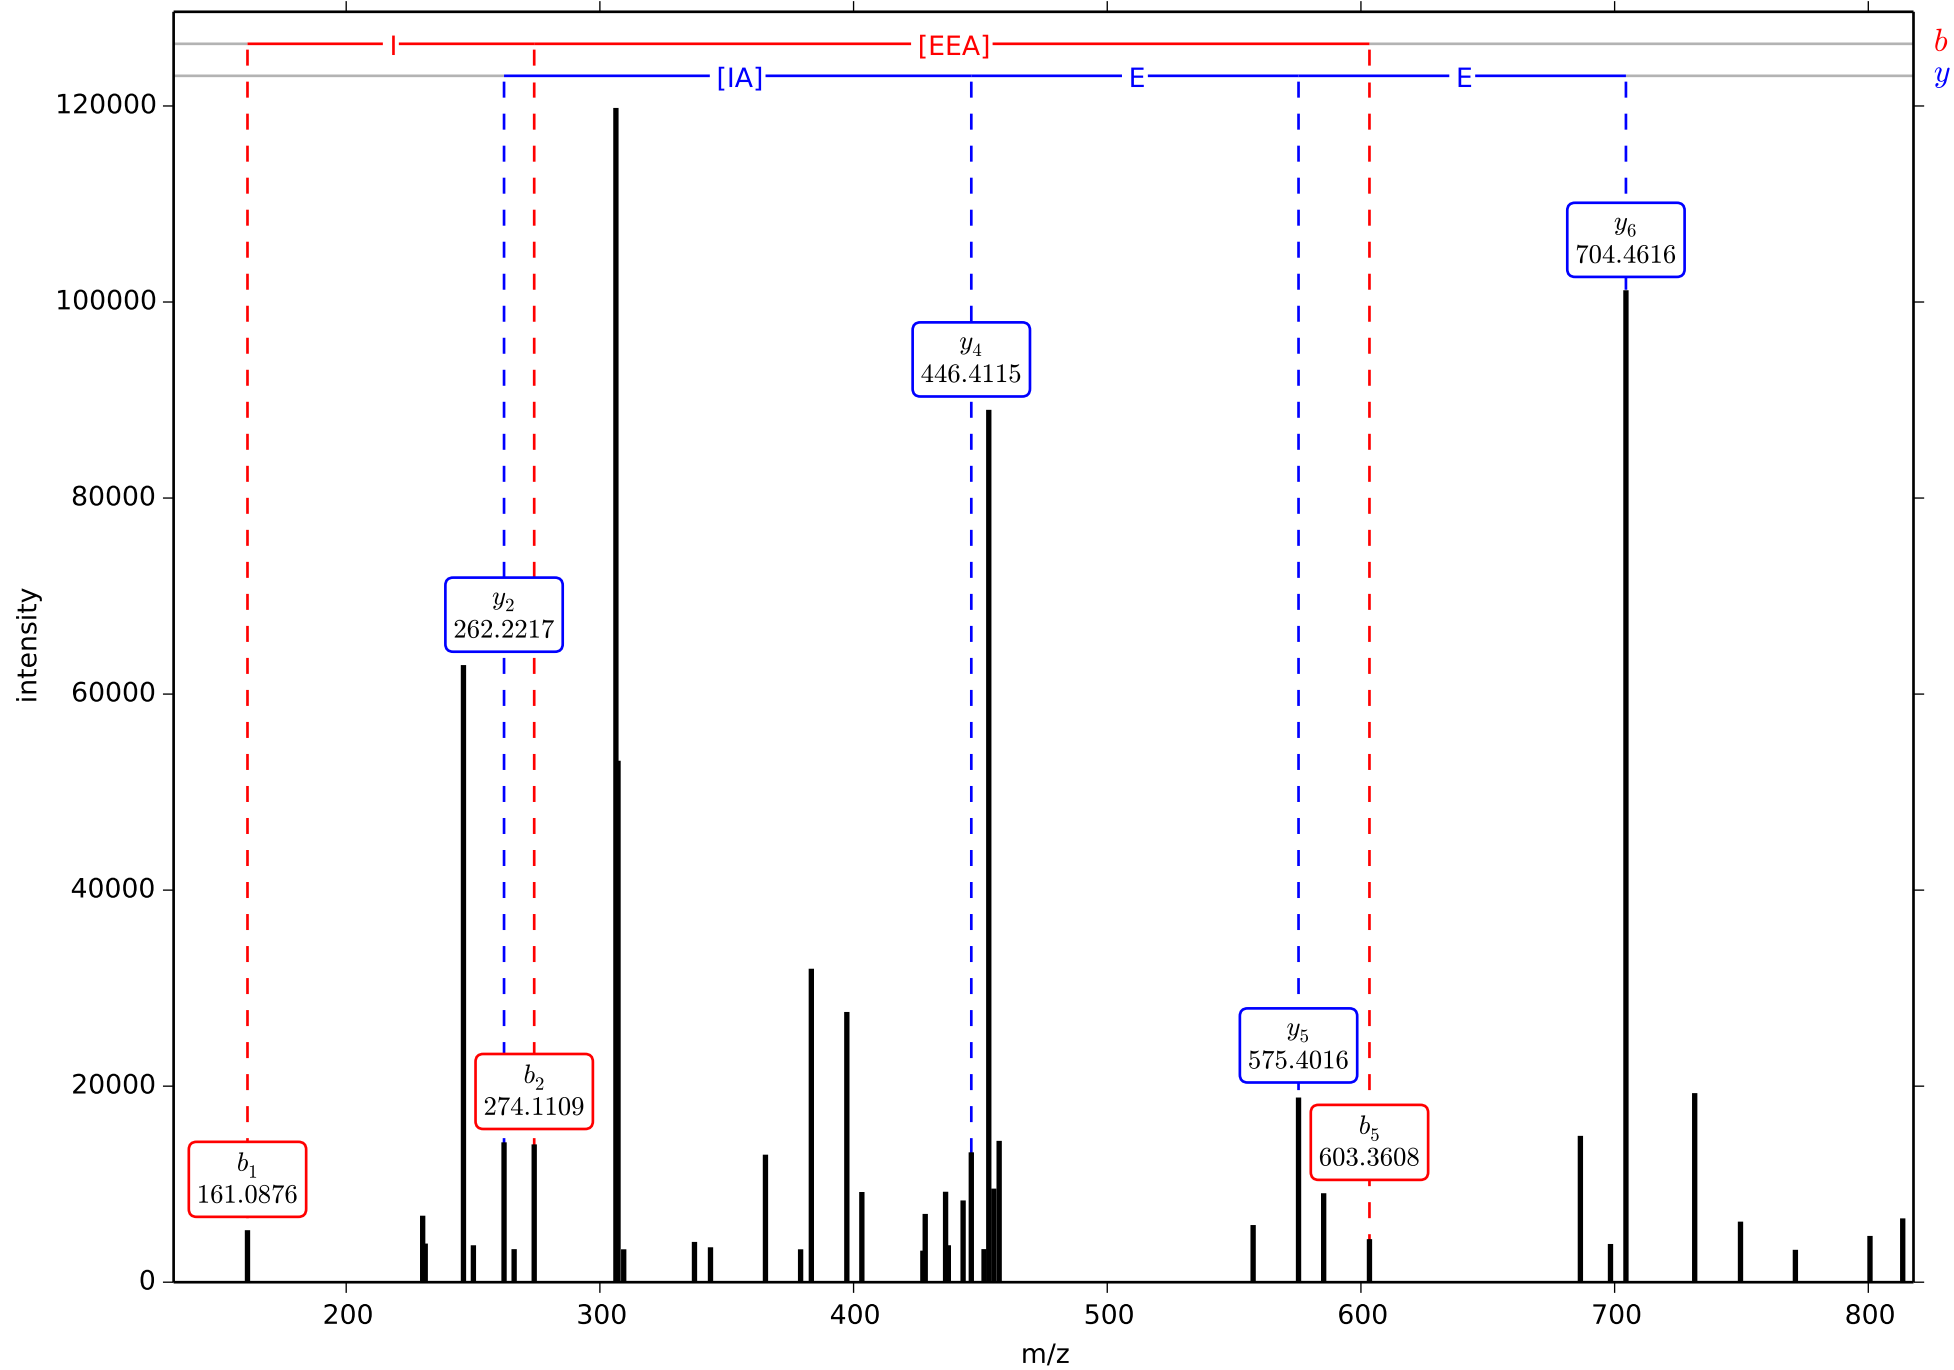



P15105 : TLDCEPK

parent: 431.701250,2+

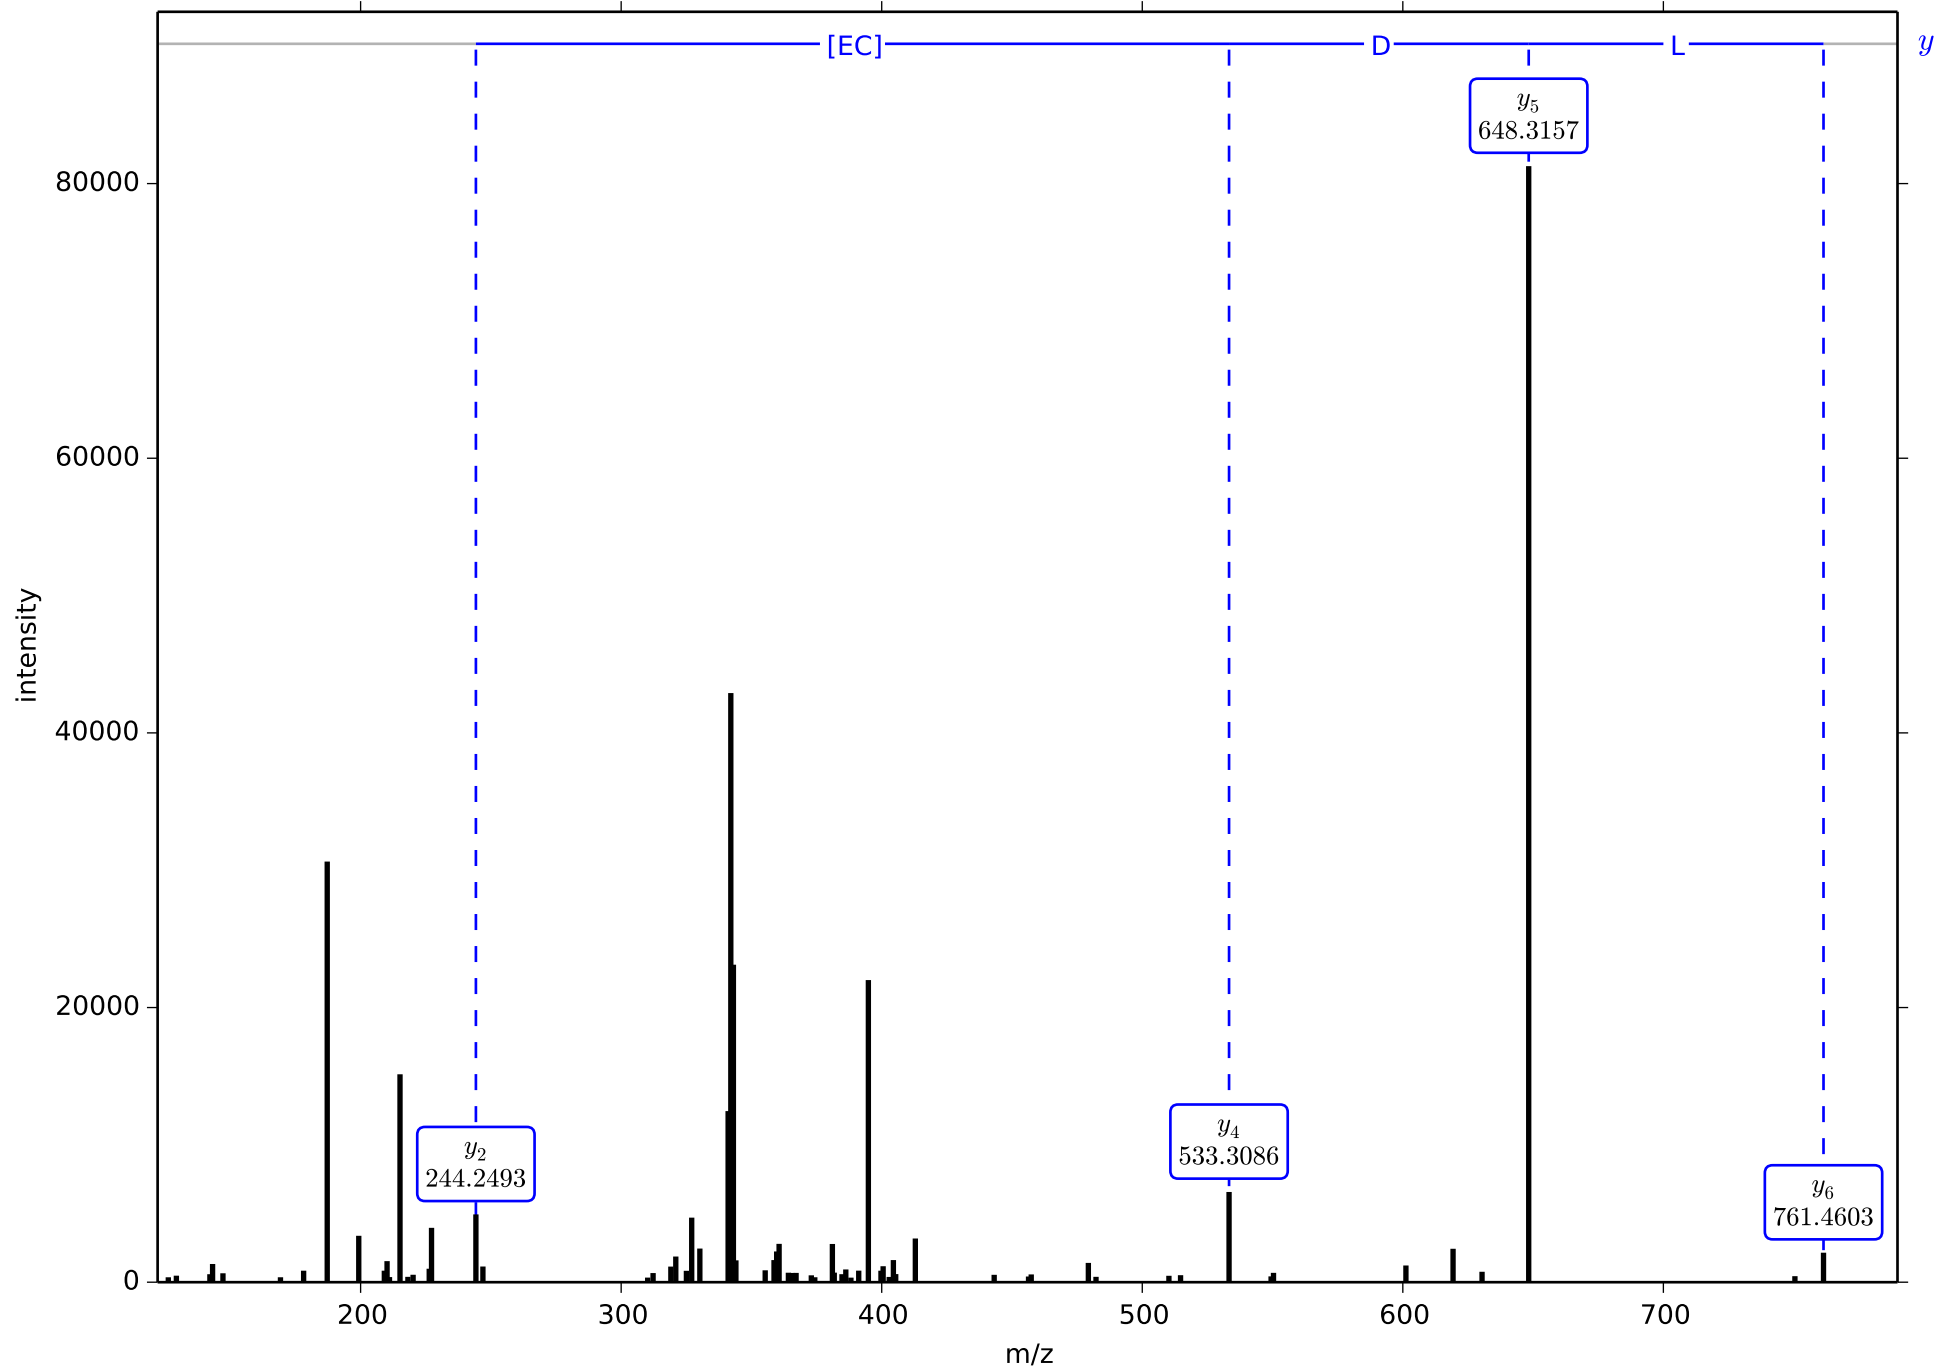

P15105 : CIEEAIDKLSK

parent: 653.338710,2+

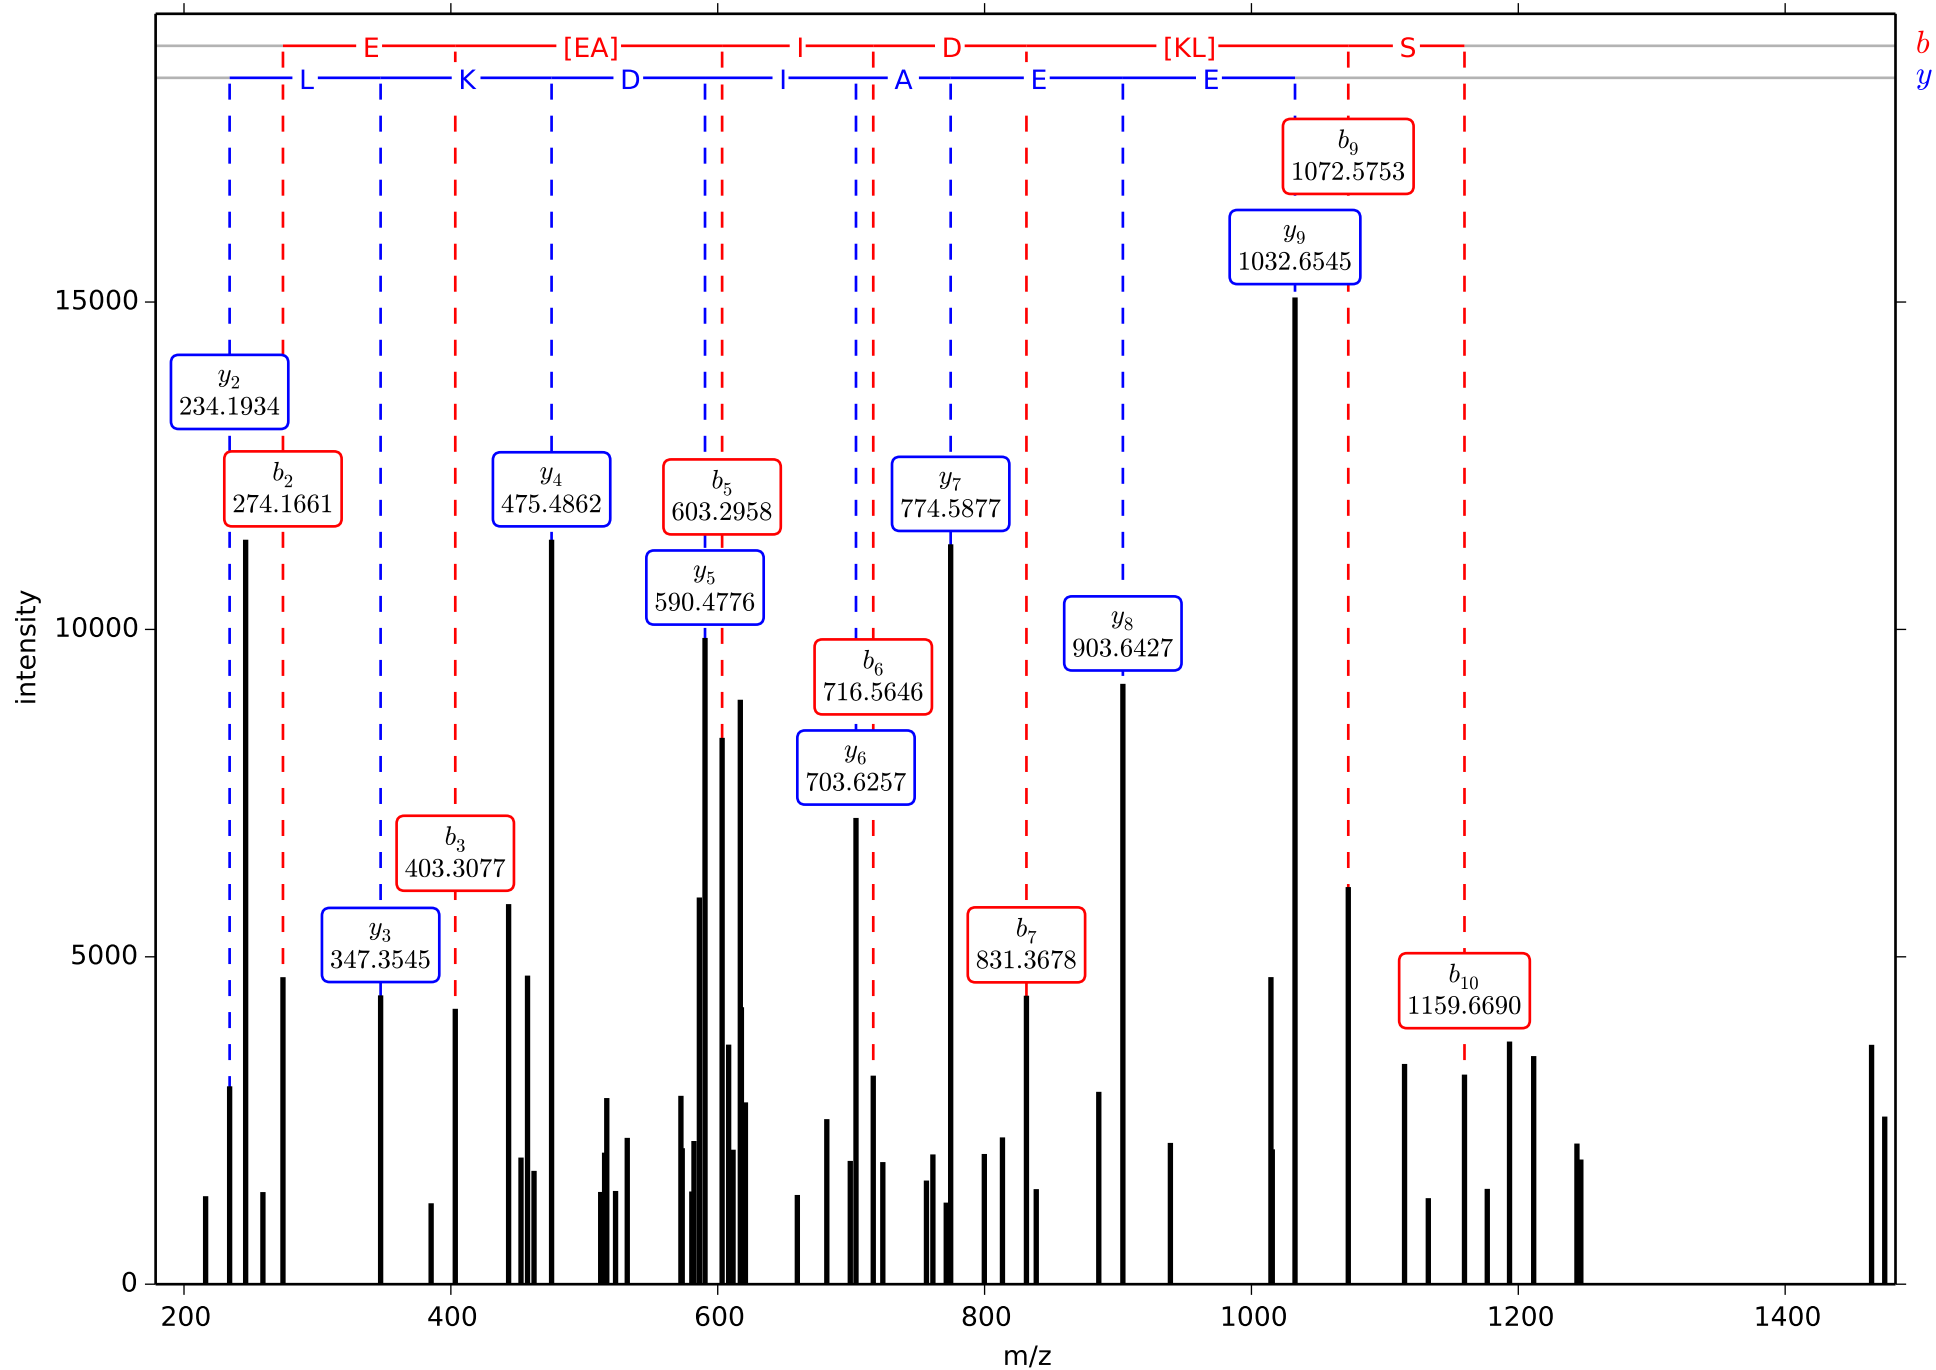

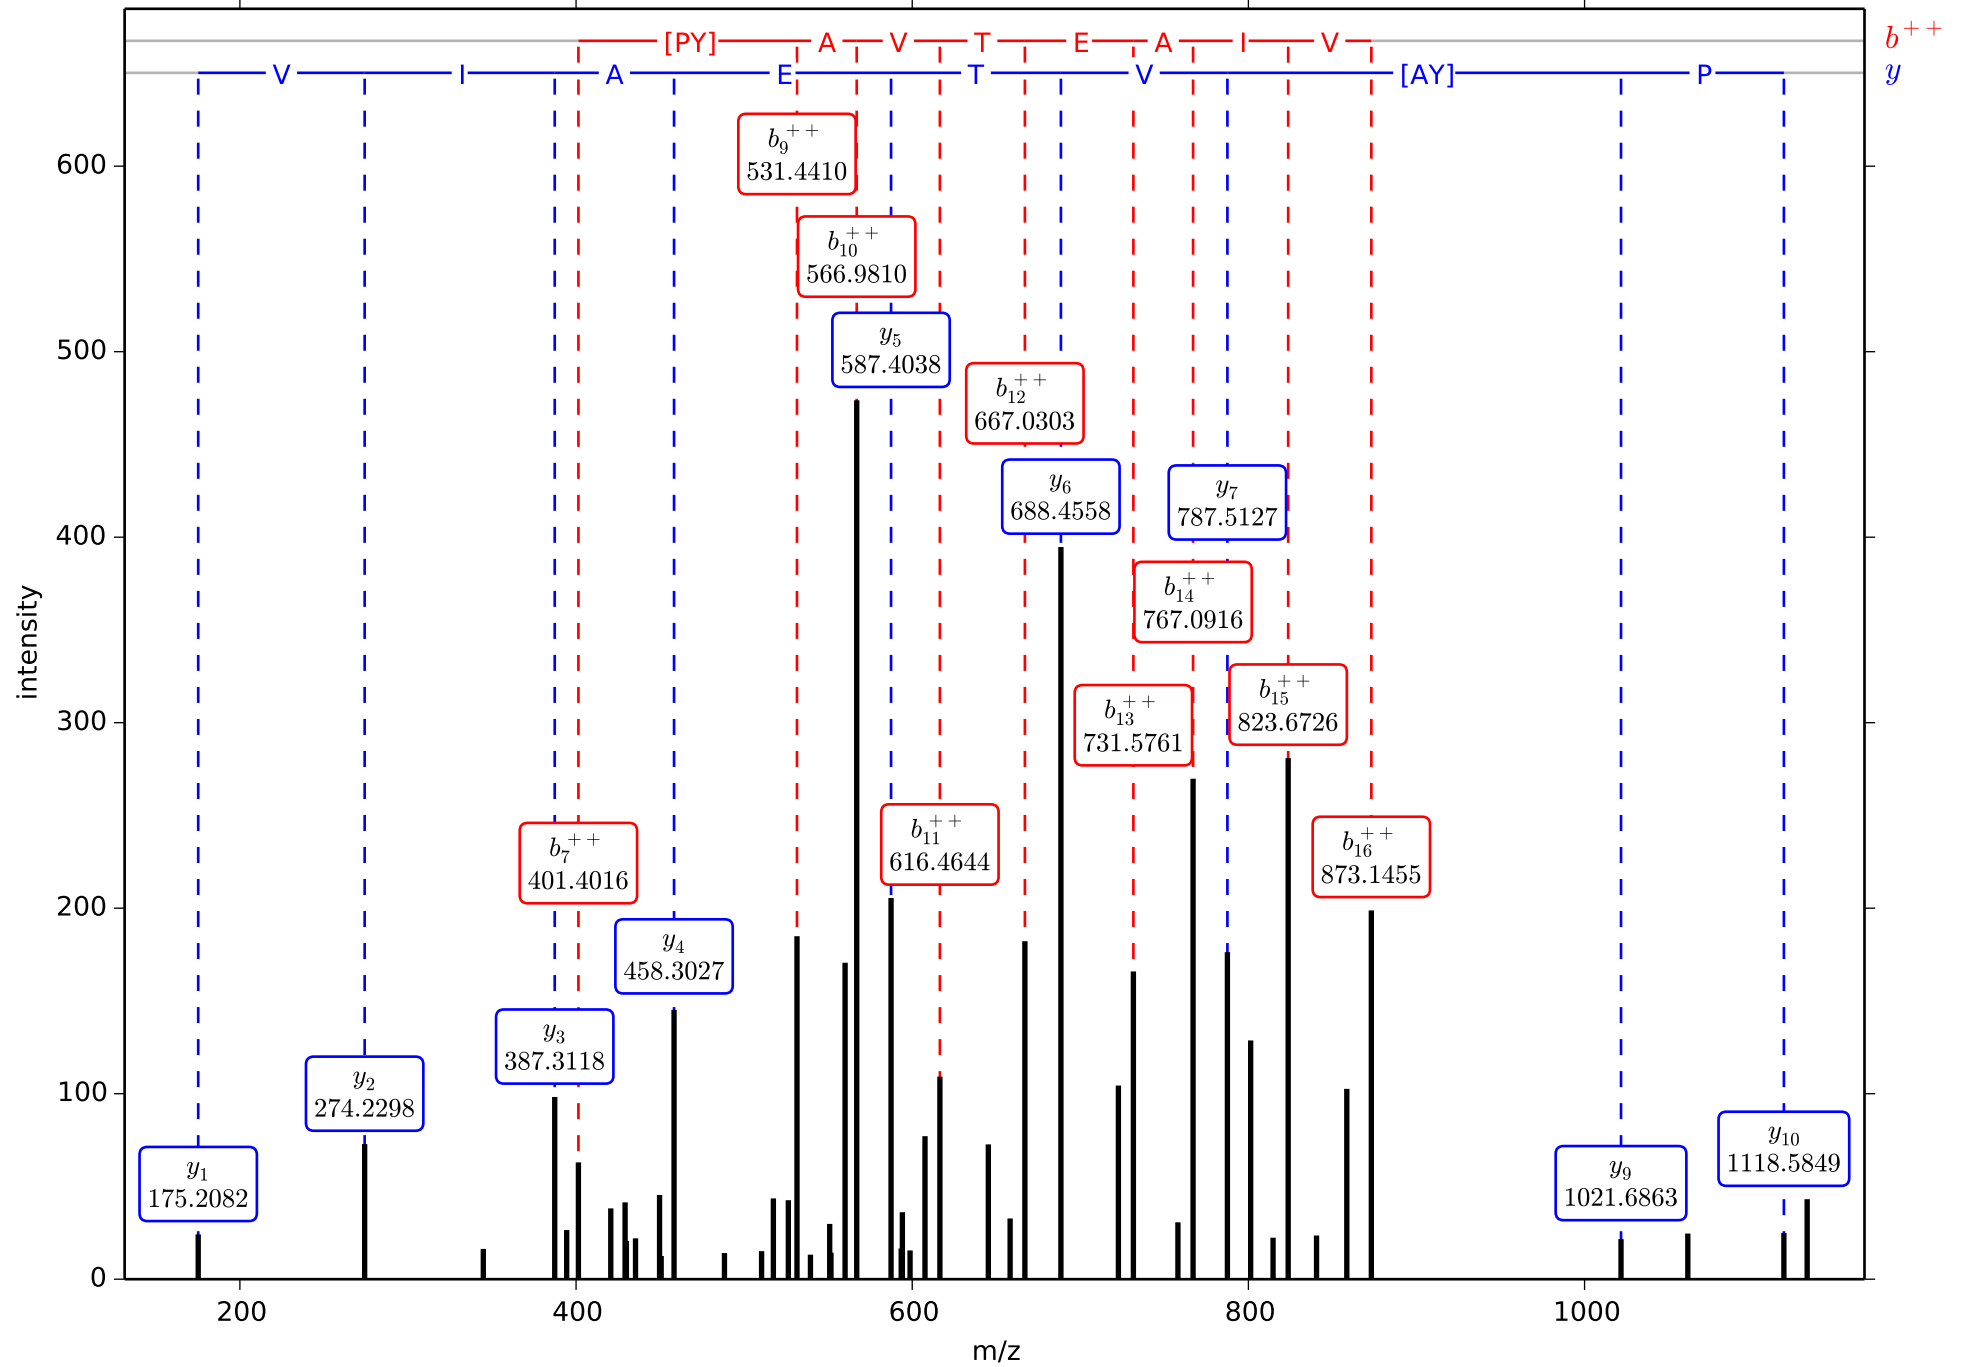

P15105 : TLLNETGDEPFQYKN

parent: 964.935780,2+

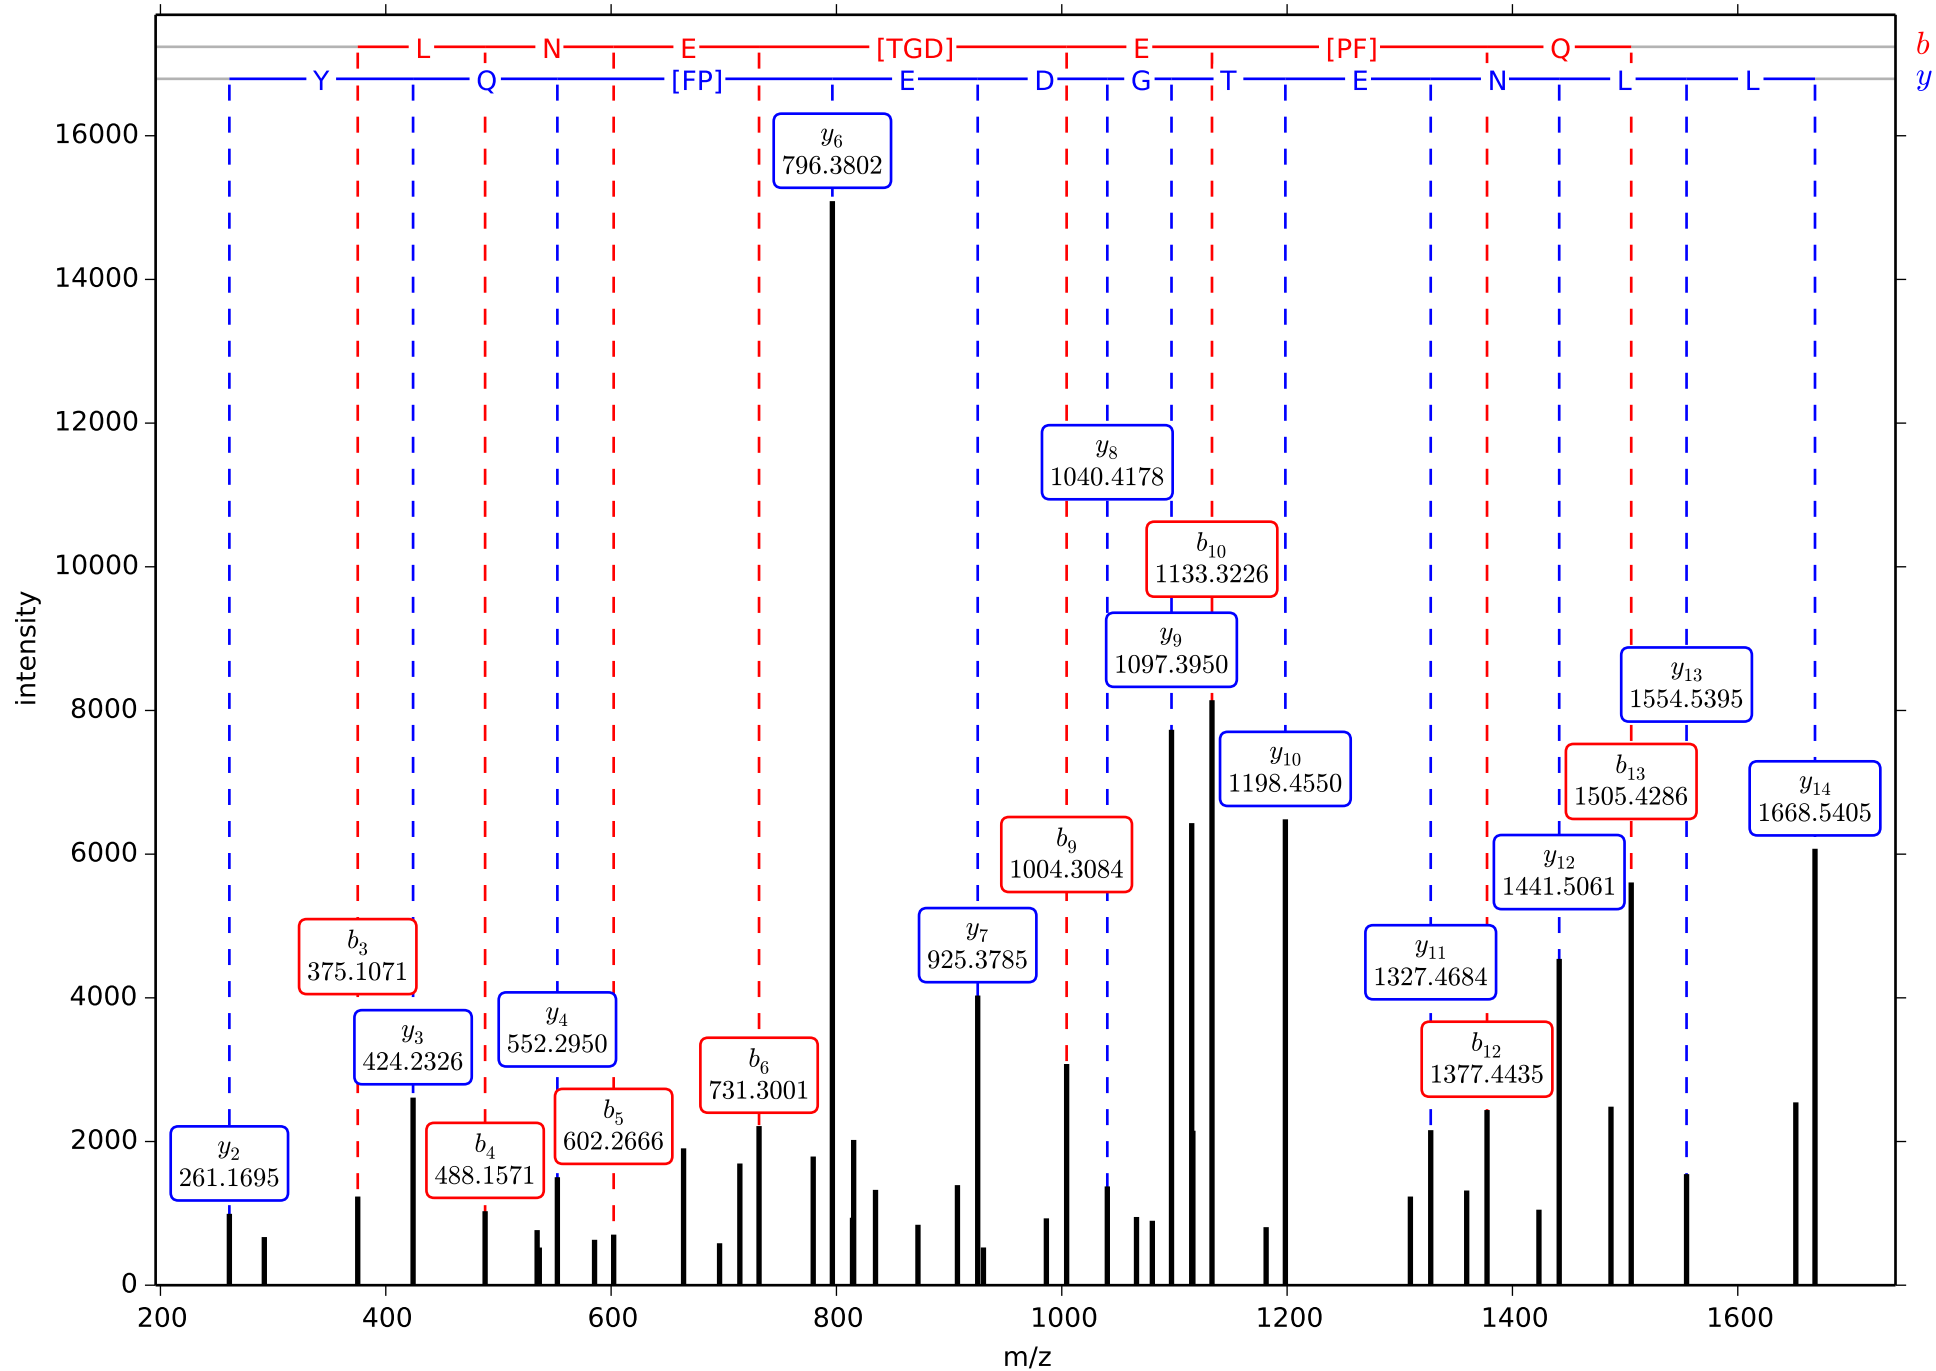



P15105 : TCLLN**E**TGDEPFQYK

parent: 907.927660,2+

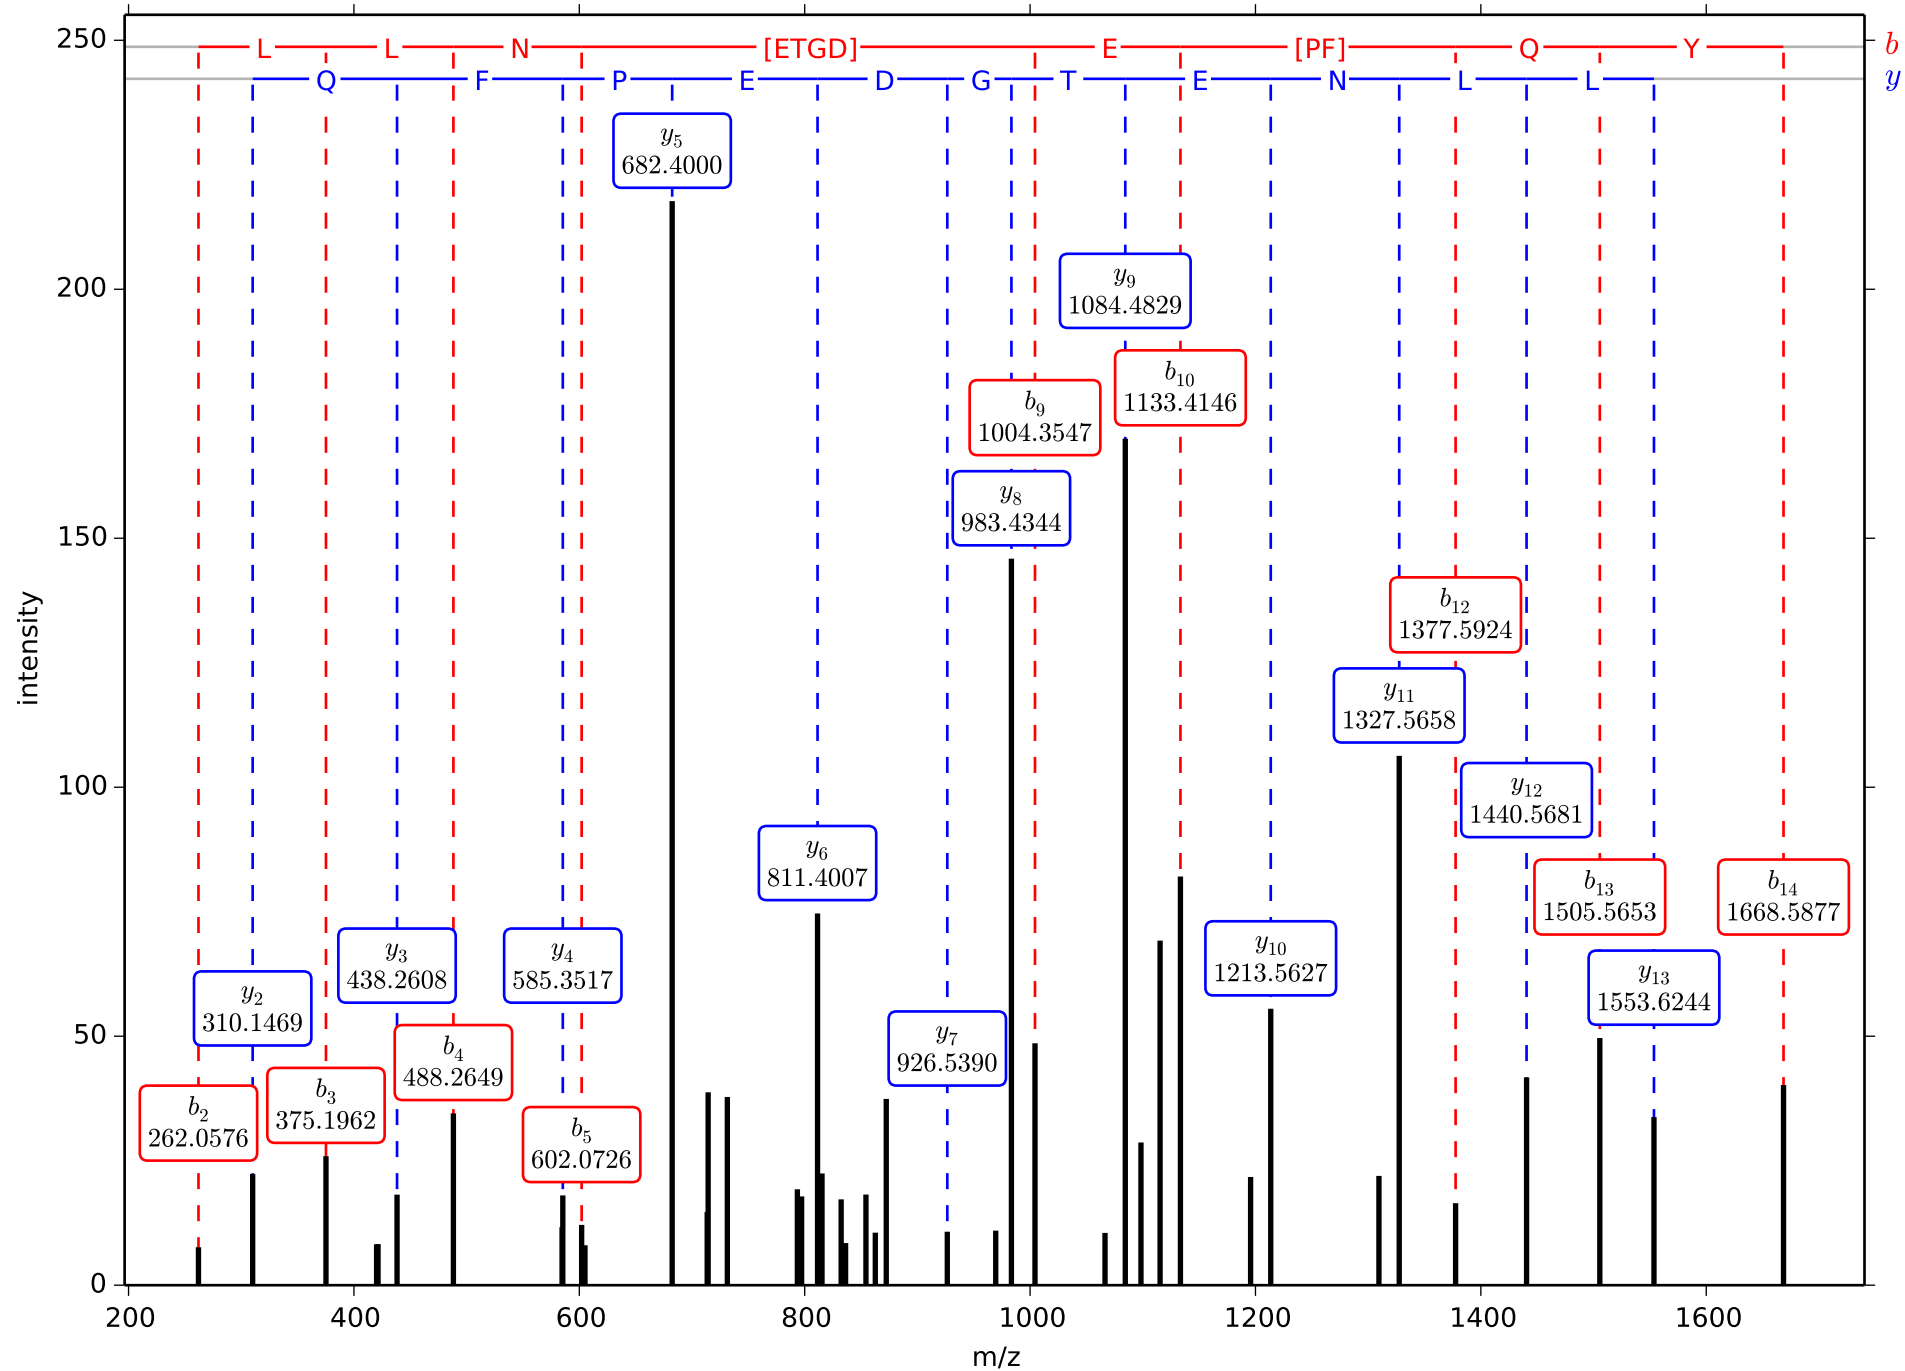

# Q6PIE5 : CSTILVQGK

parent: 503.267170,2+

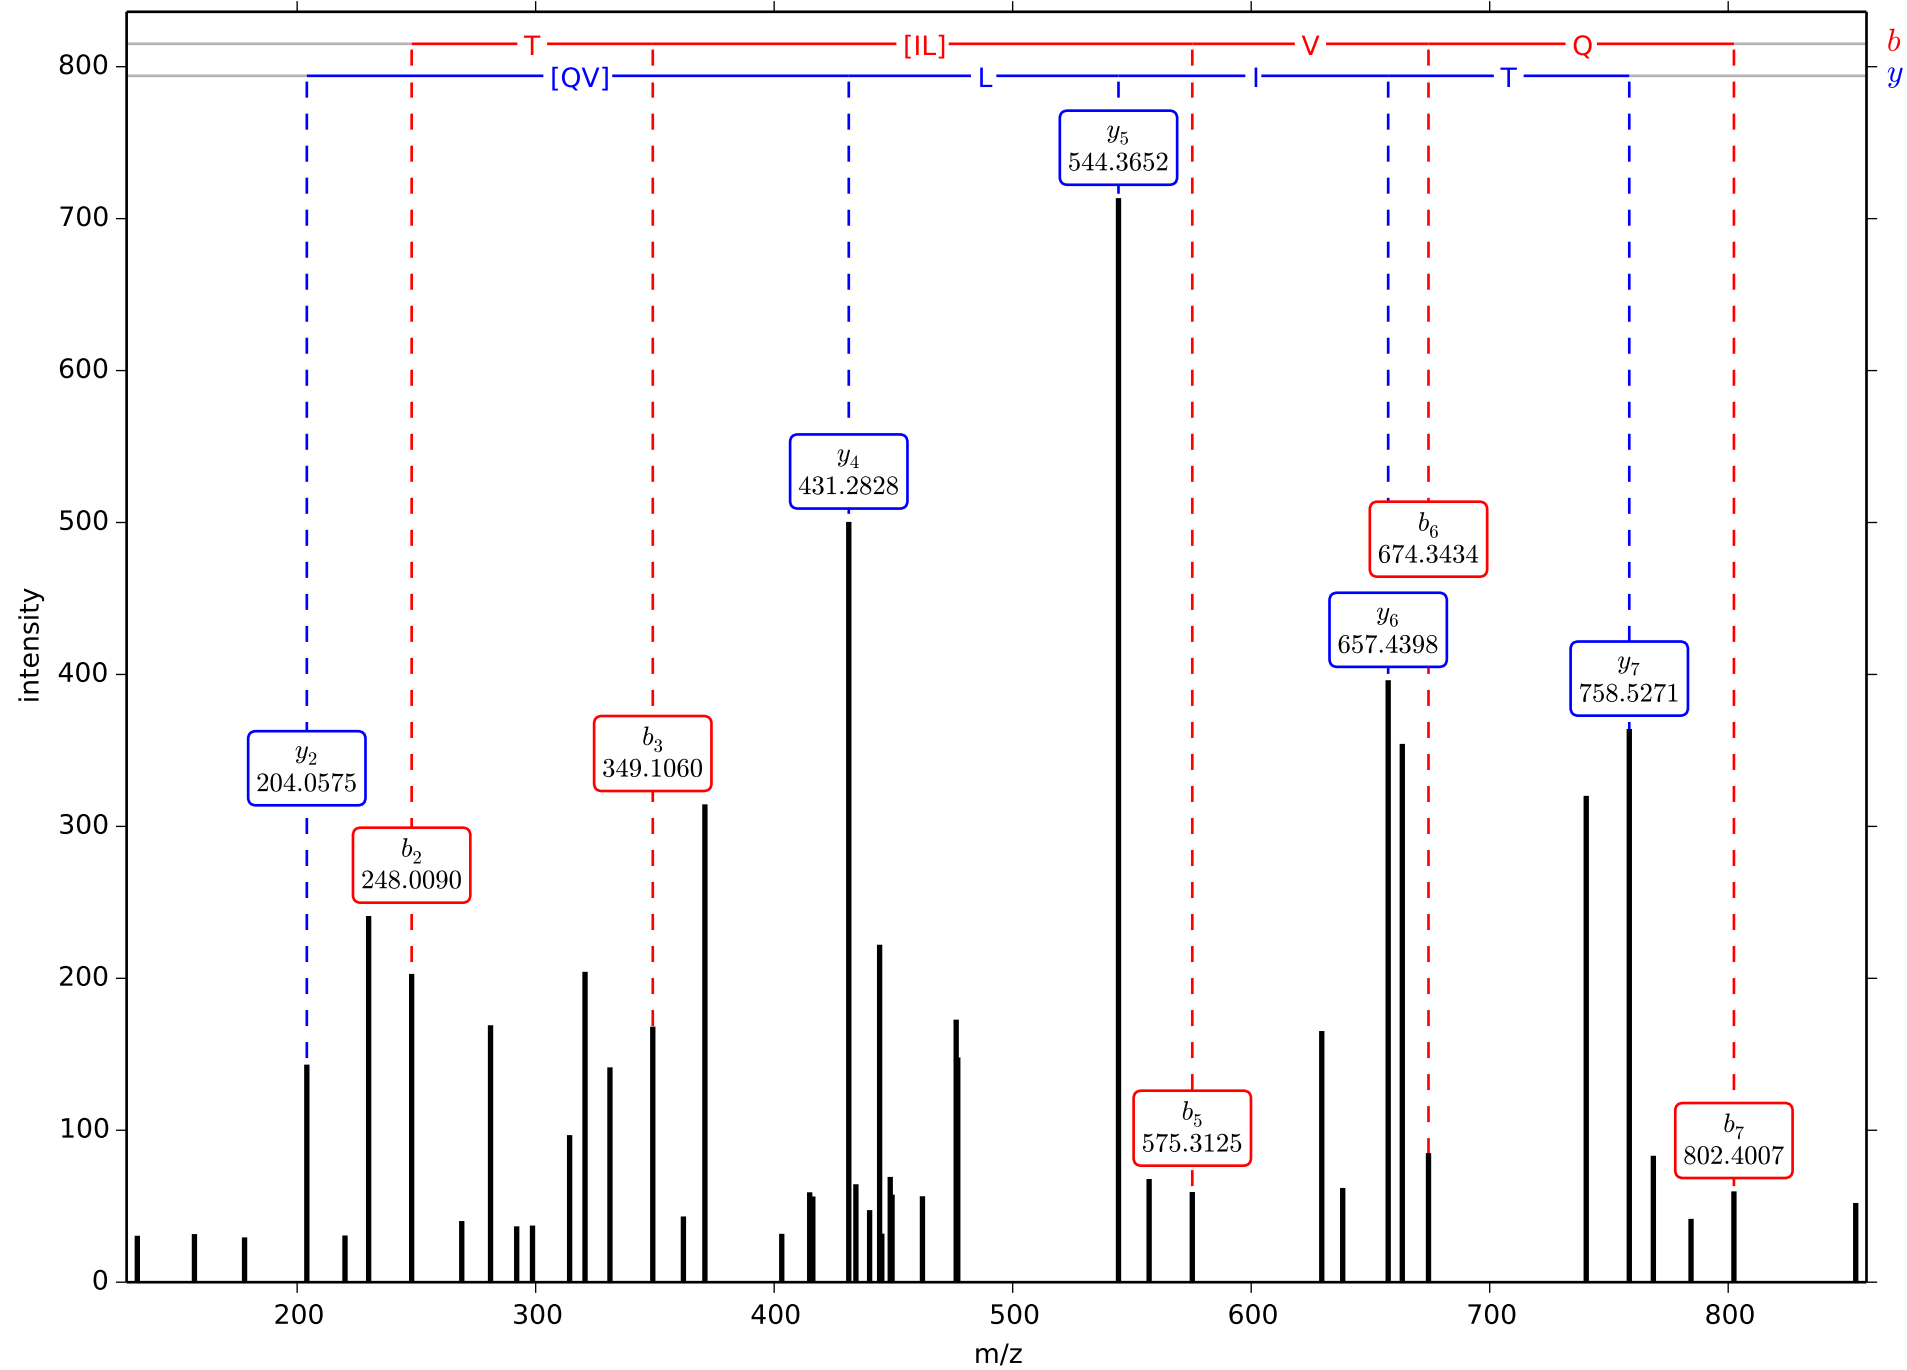

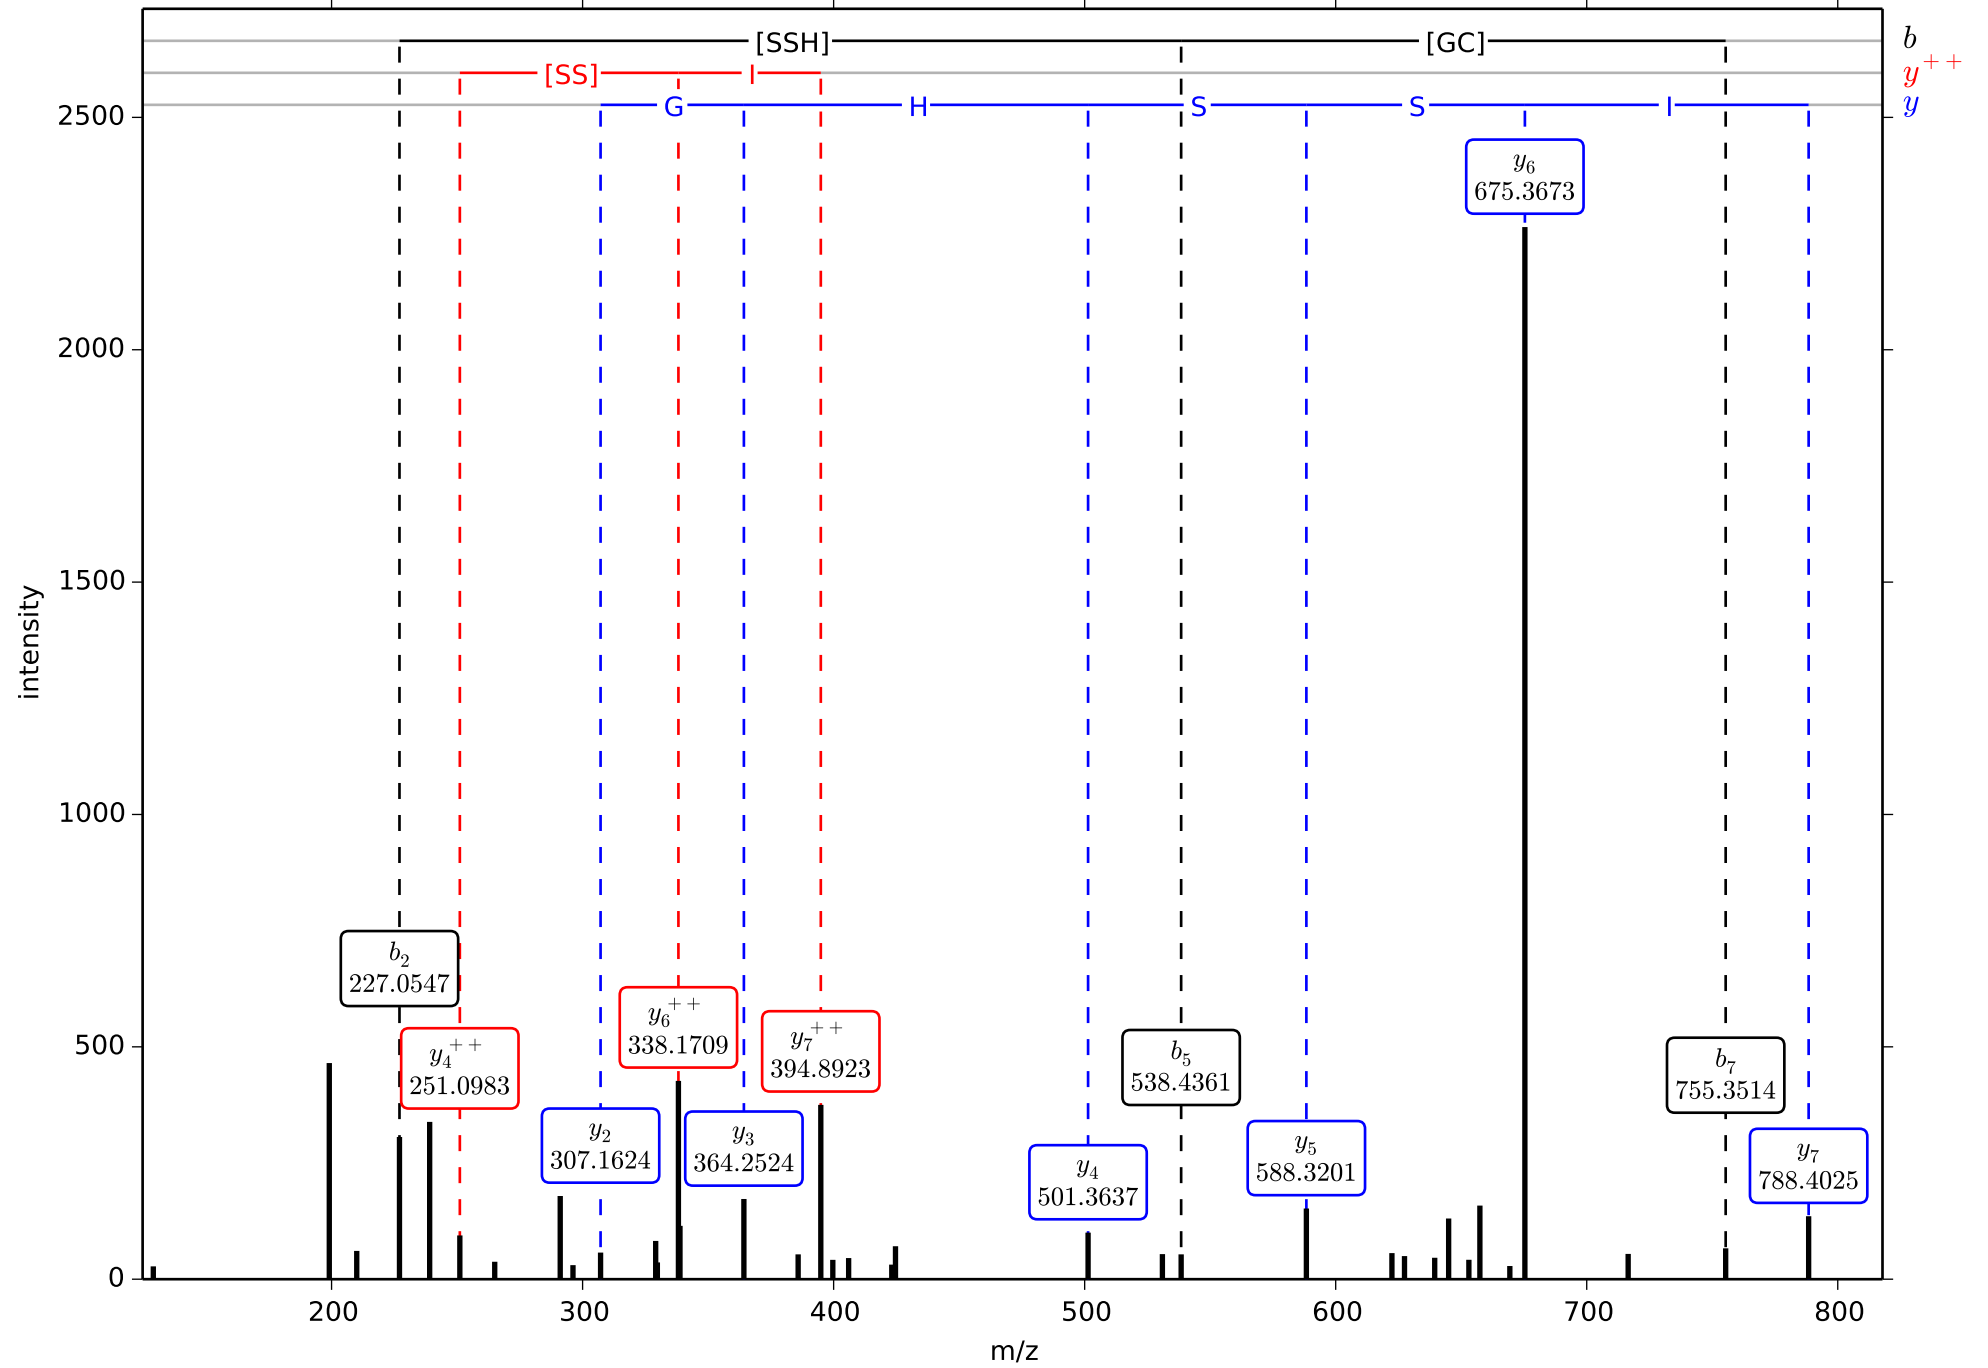

Q6PIE5 : LIIVEGCQR

parent: 544.303560,2+

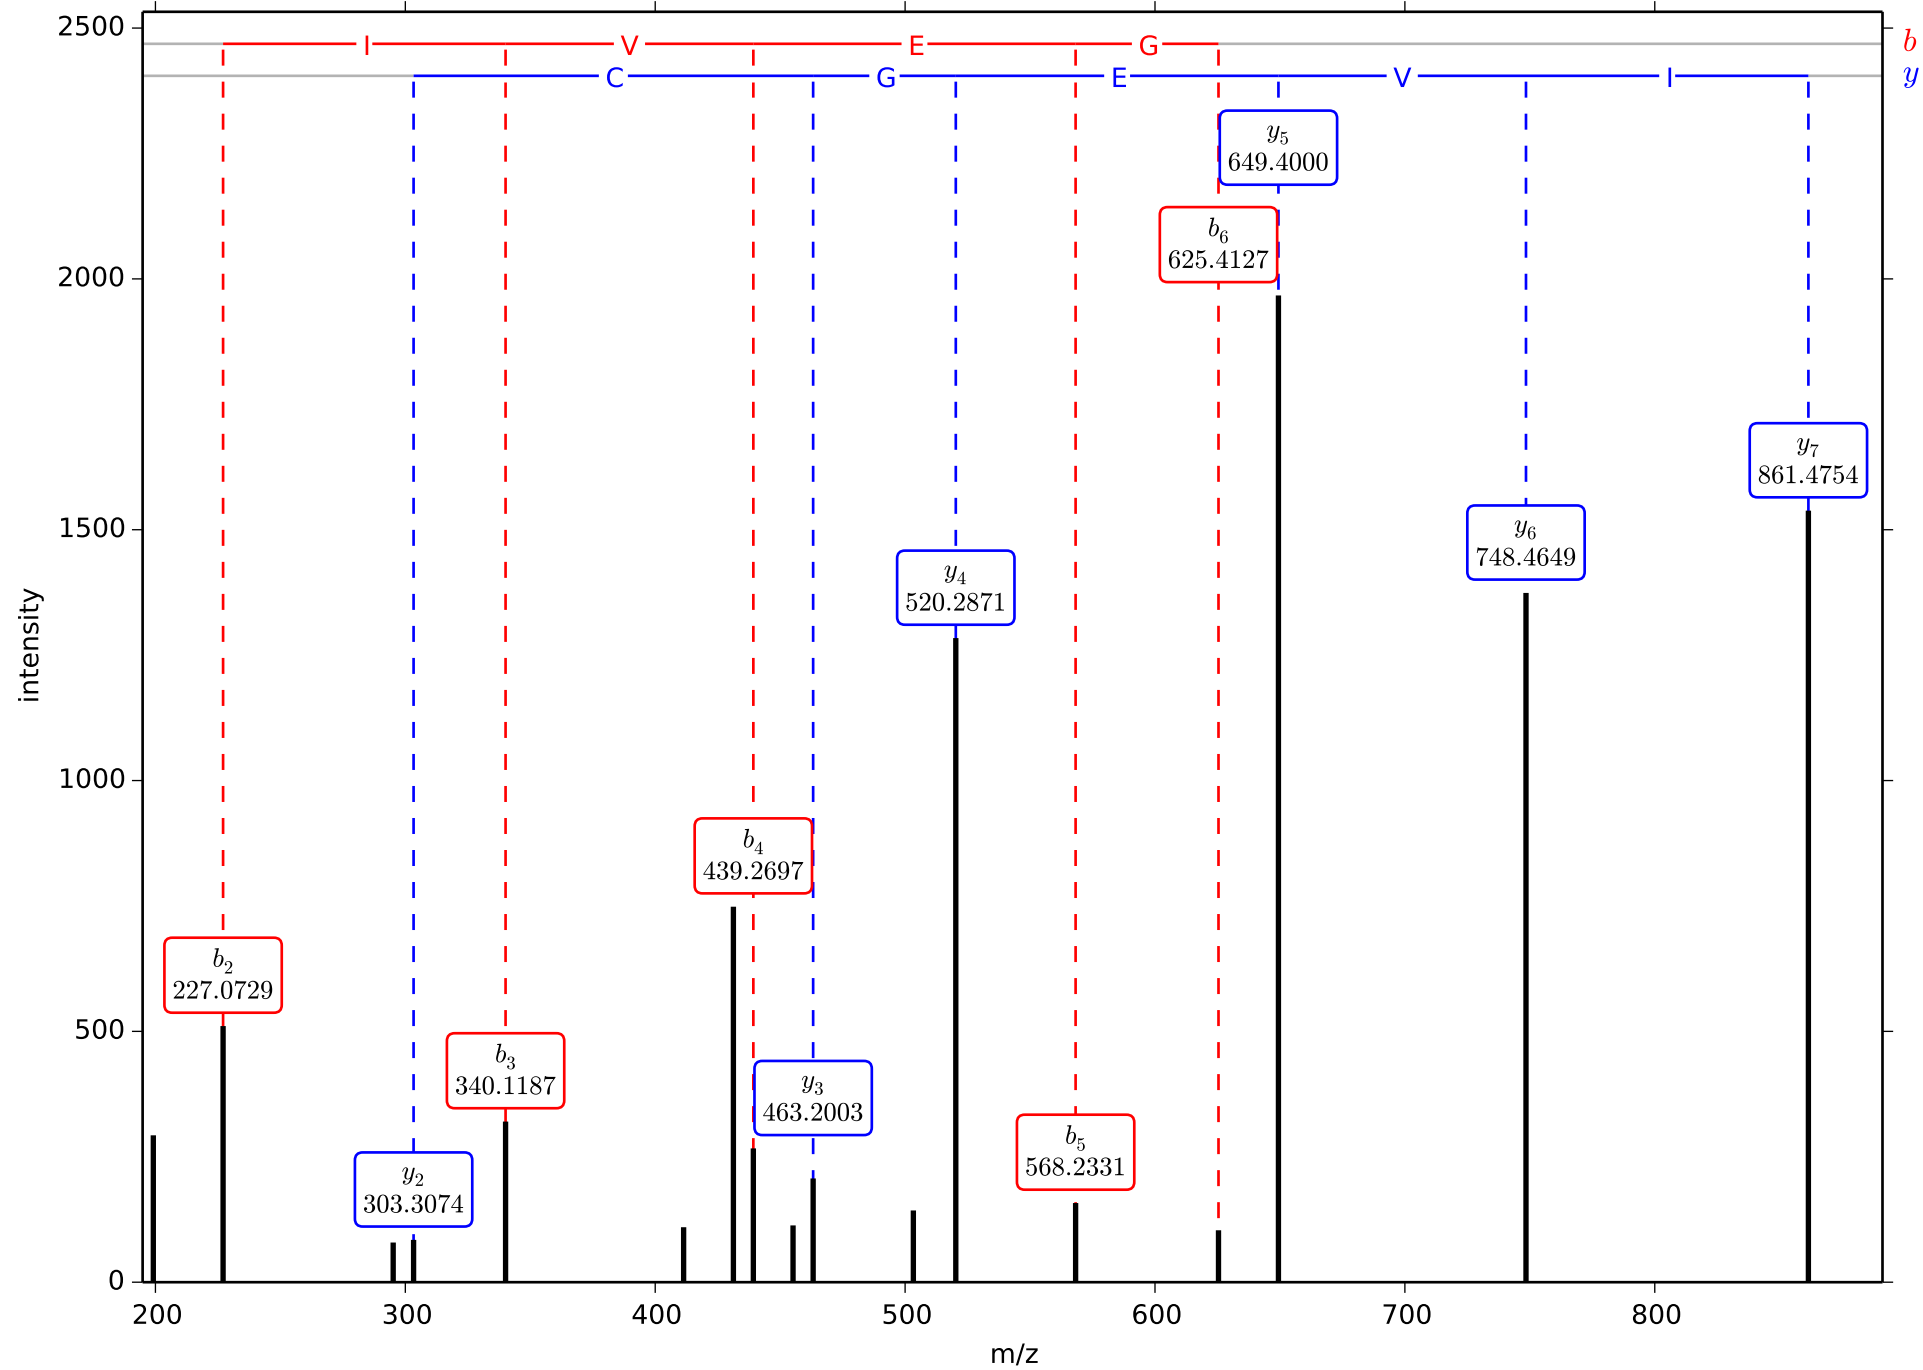

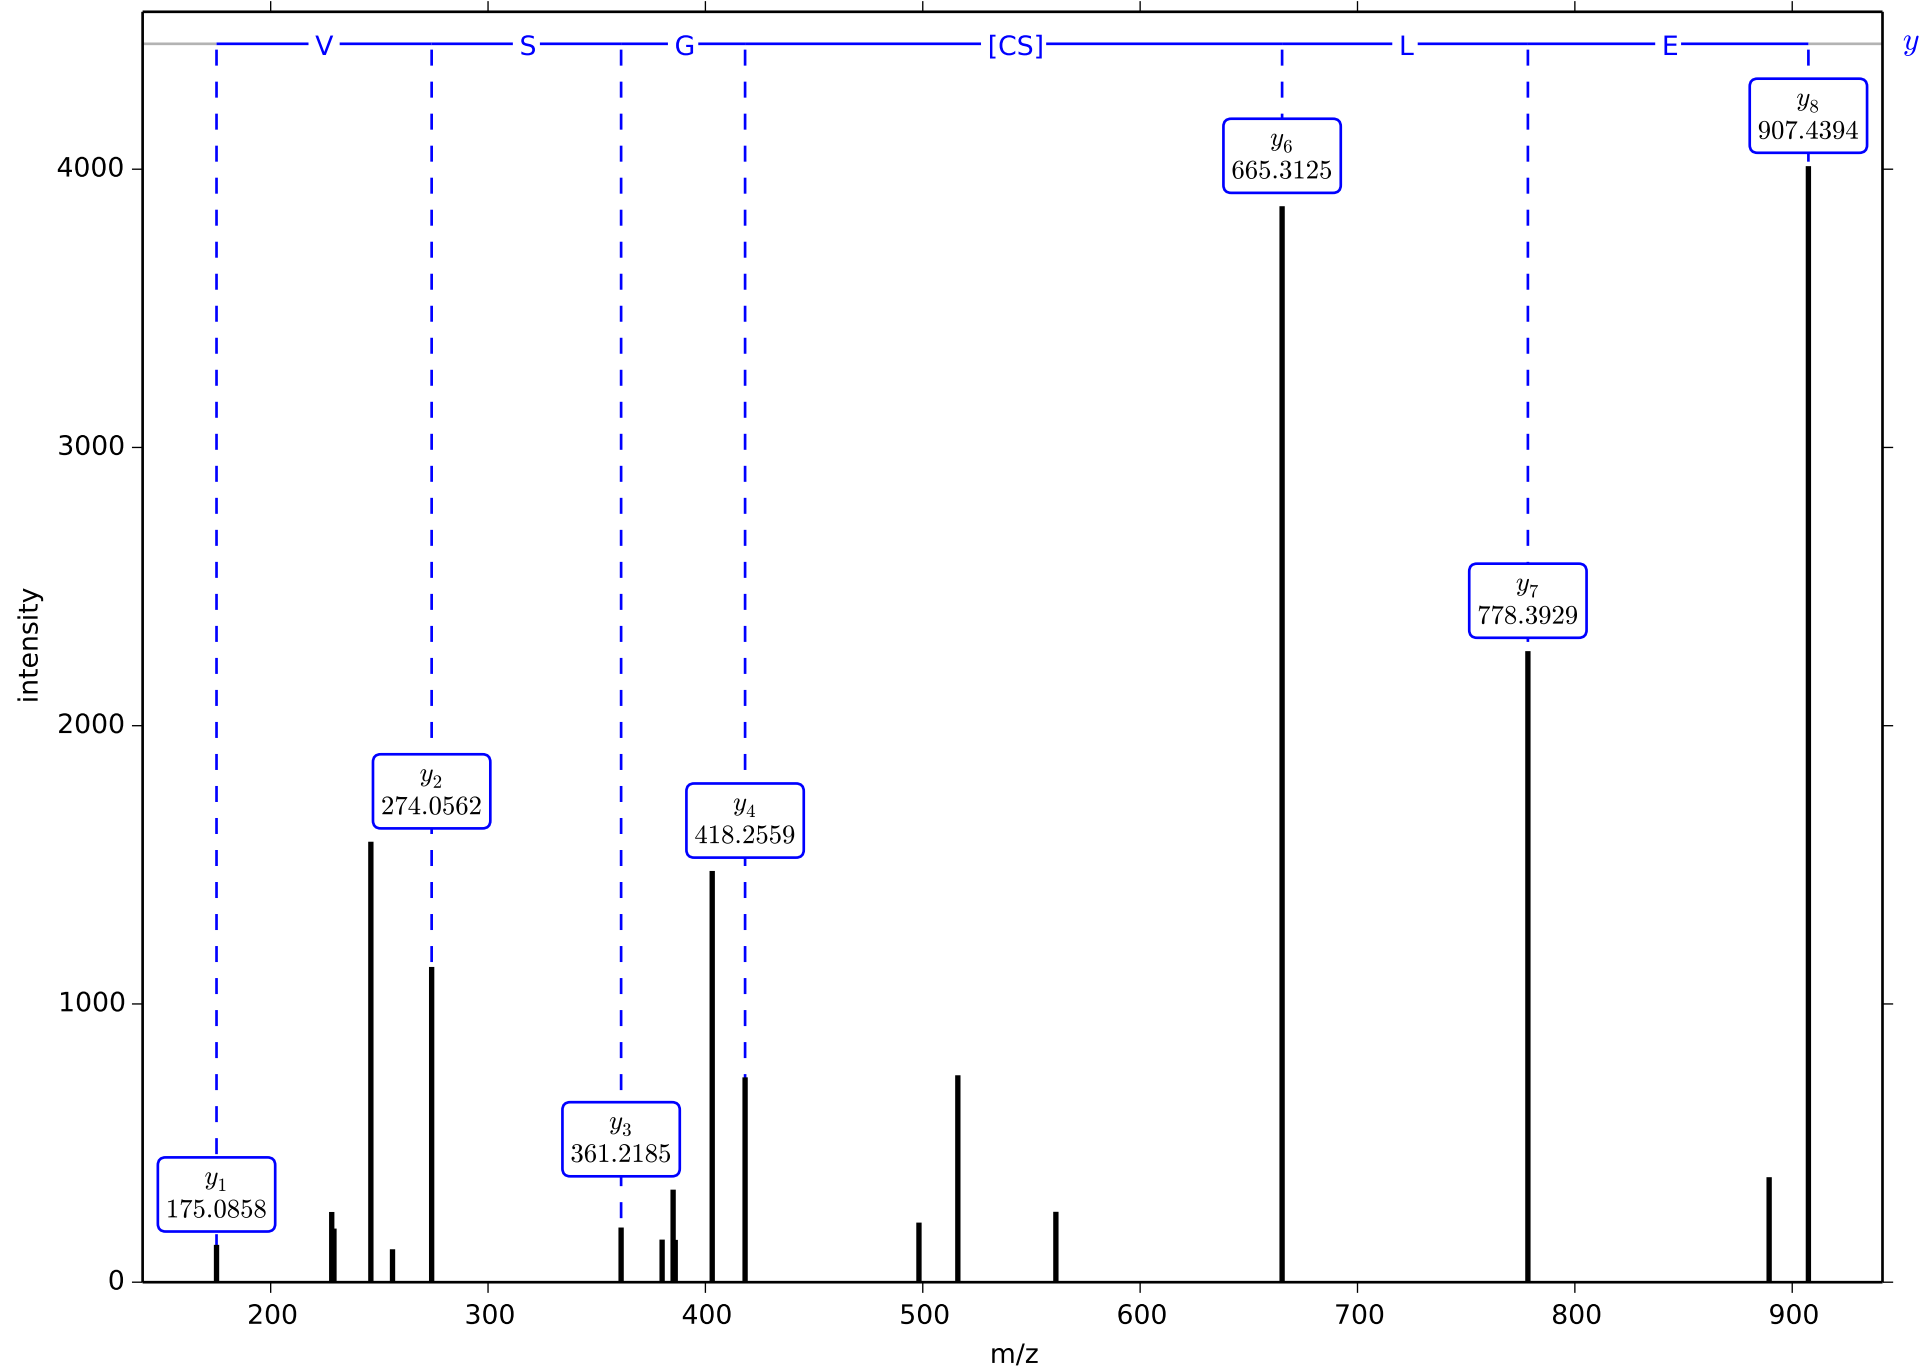

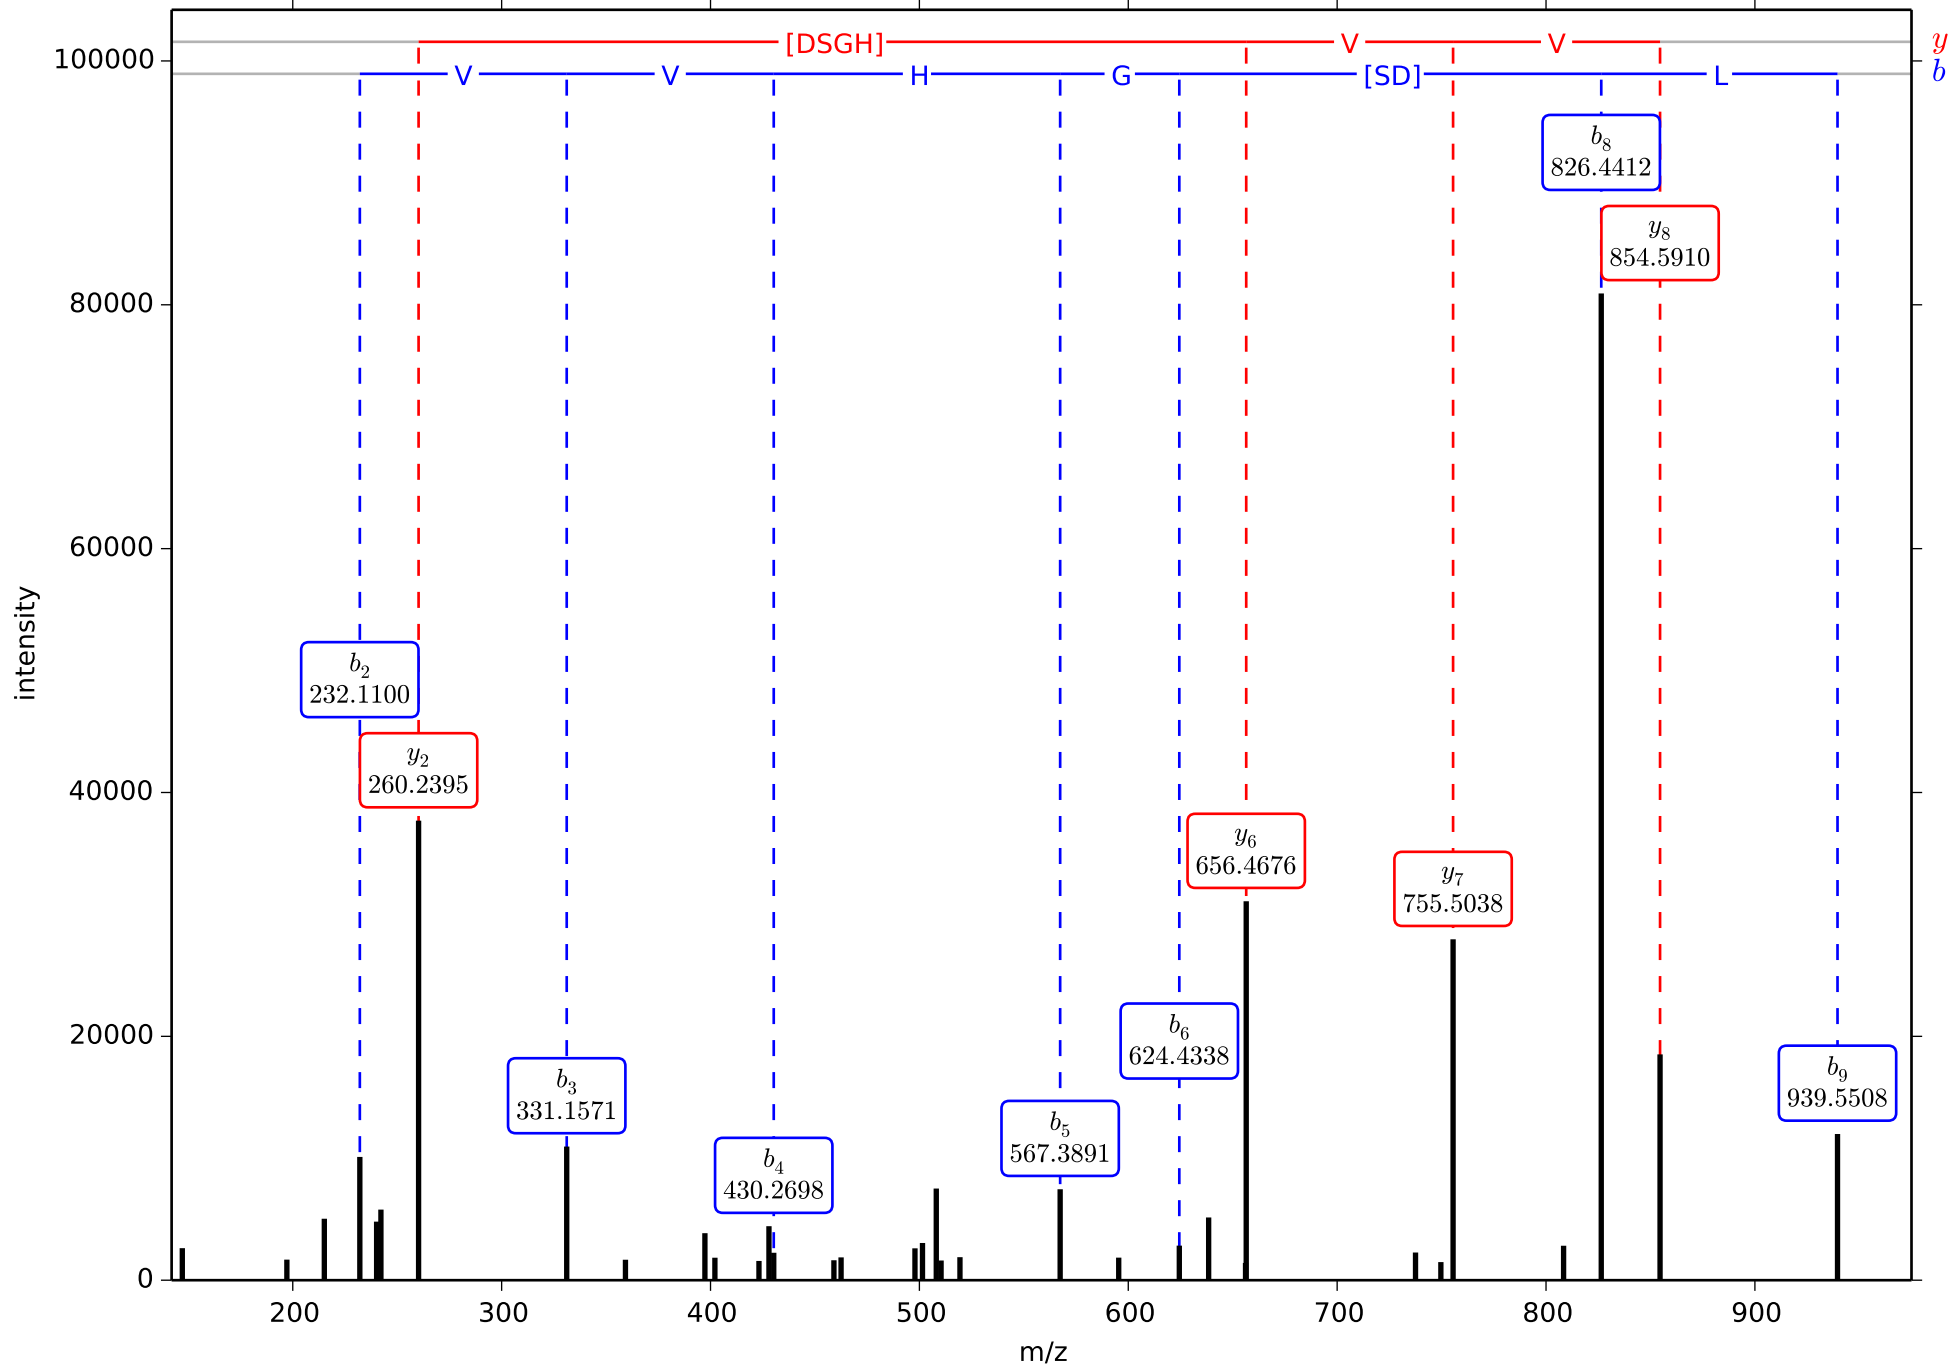

Q6PIE5 : VLGFCQLNLPSGK

parent: 716.883260,2+

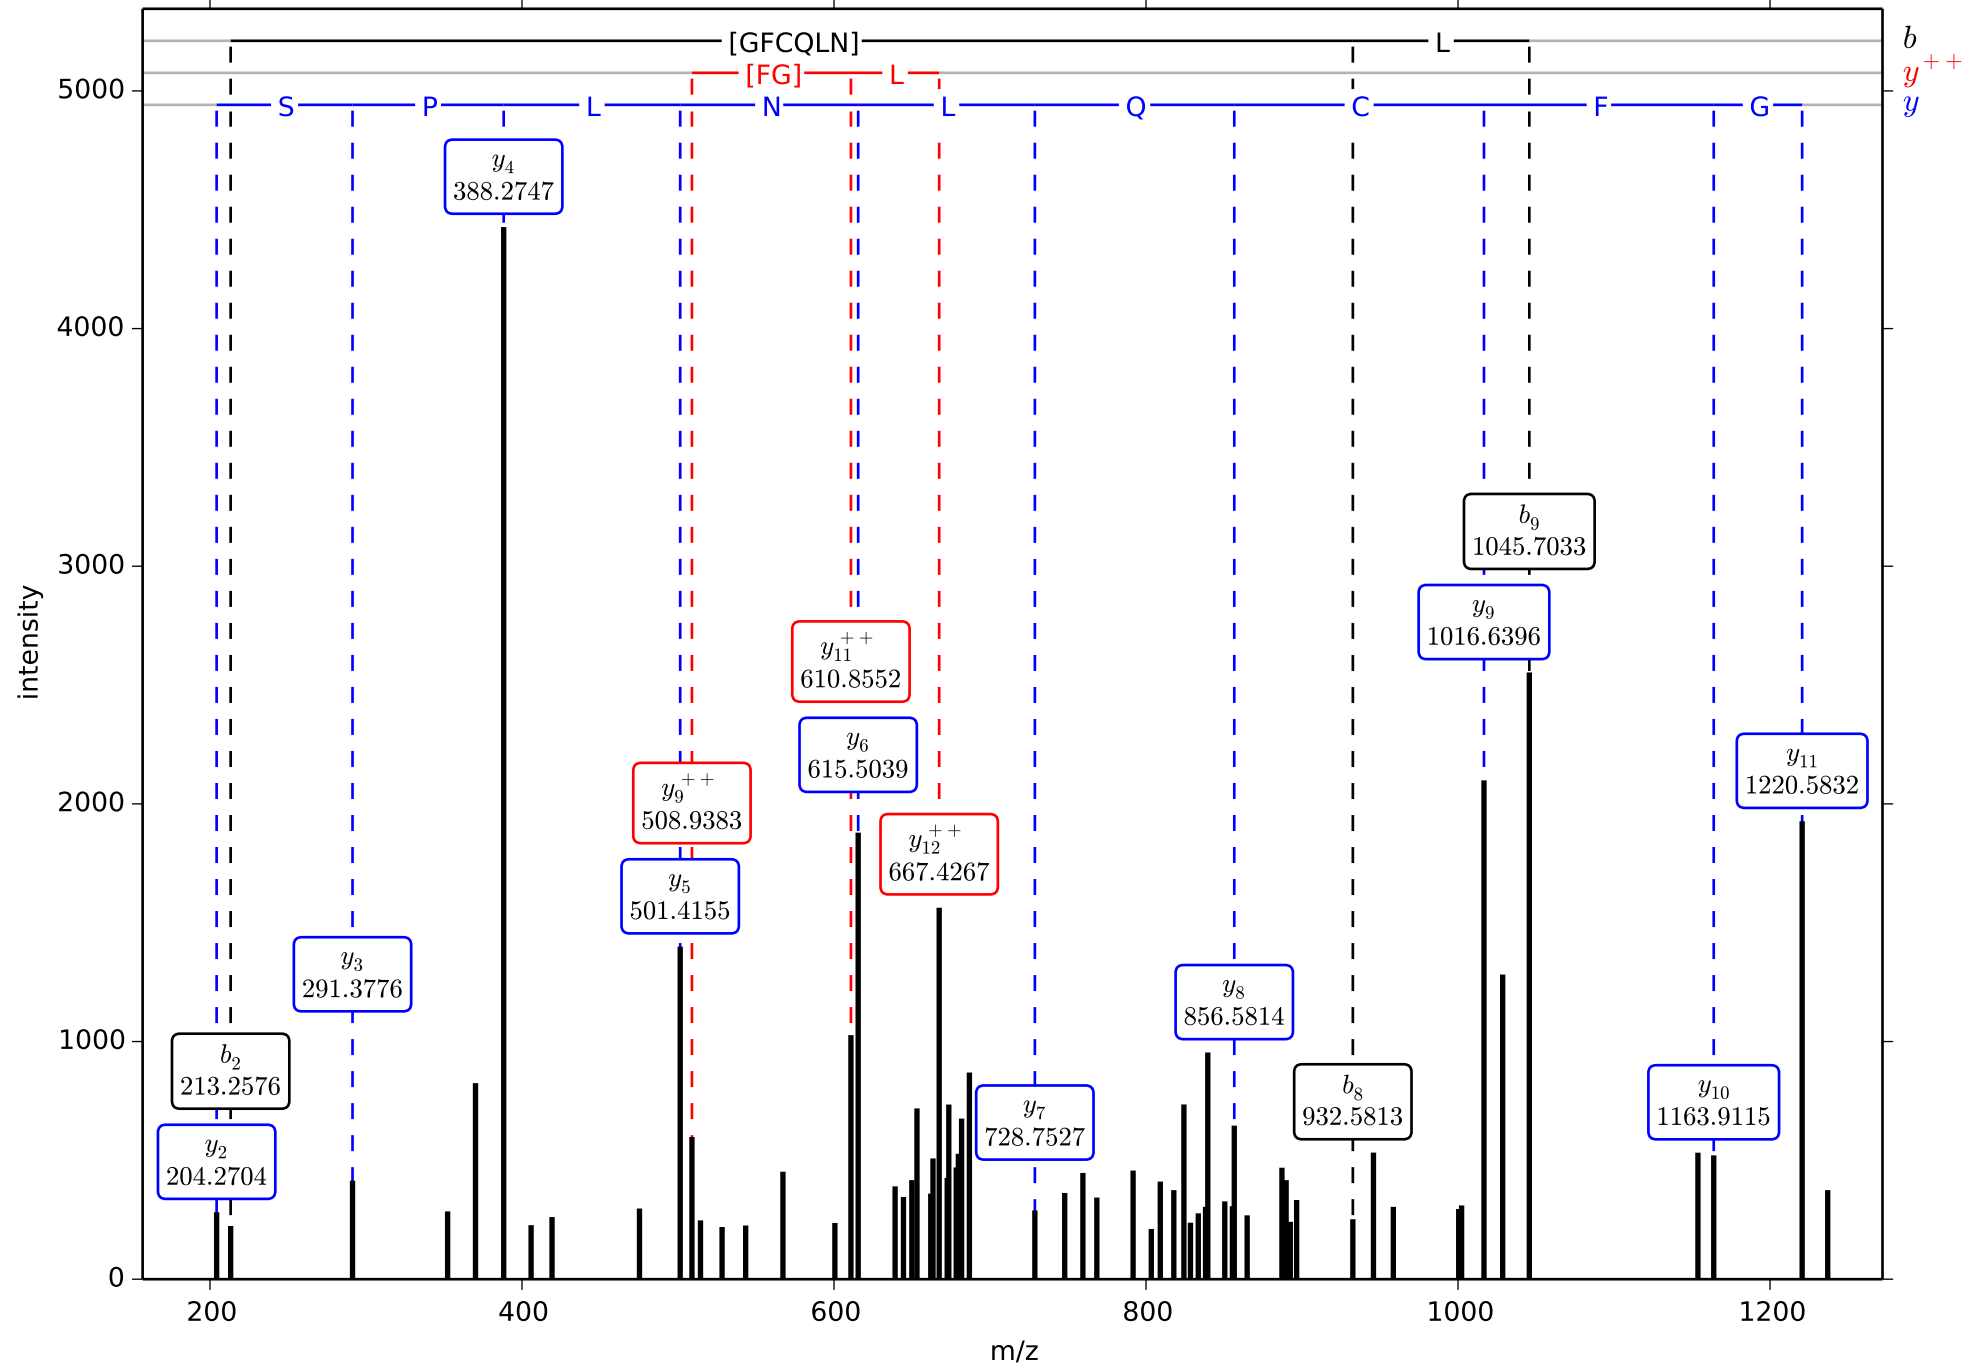

Q6PIE5 : NICFFSTNCVEGTAR

parent: 888.395110,2+

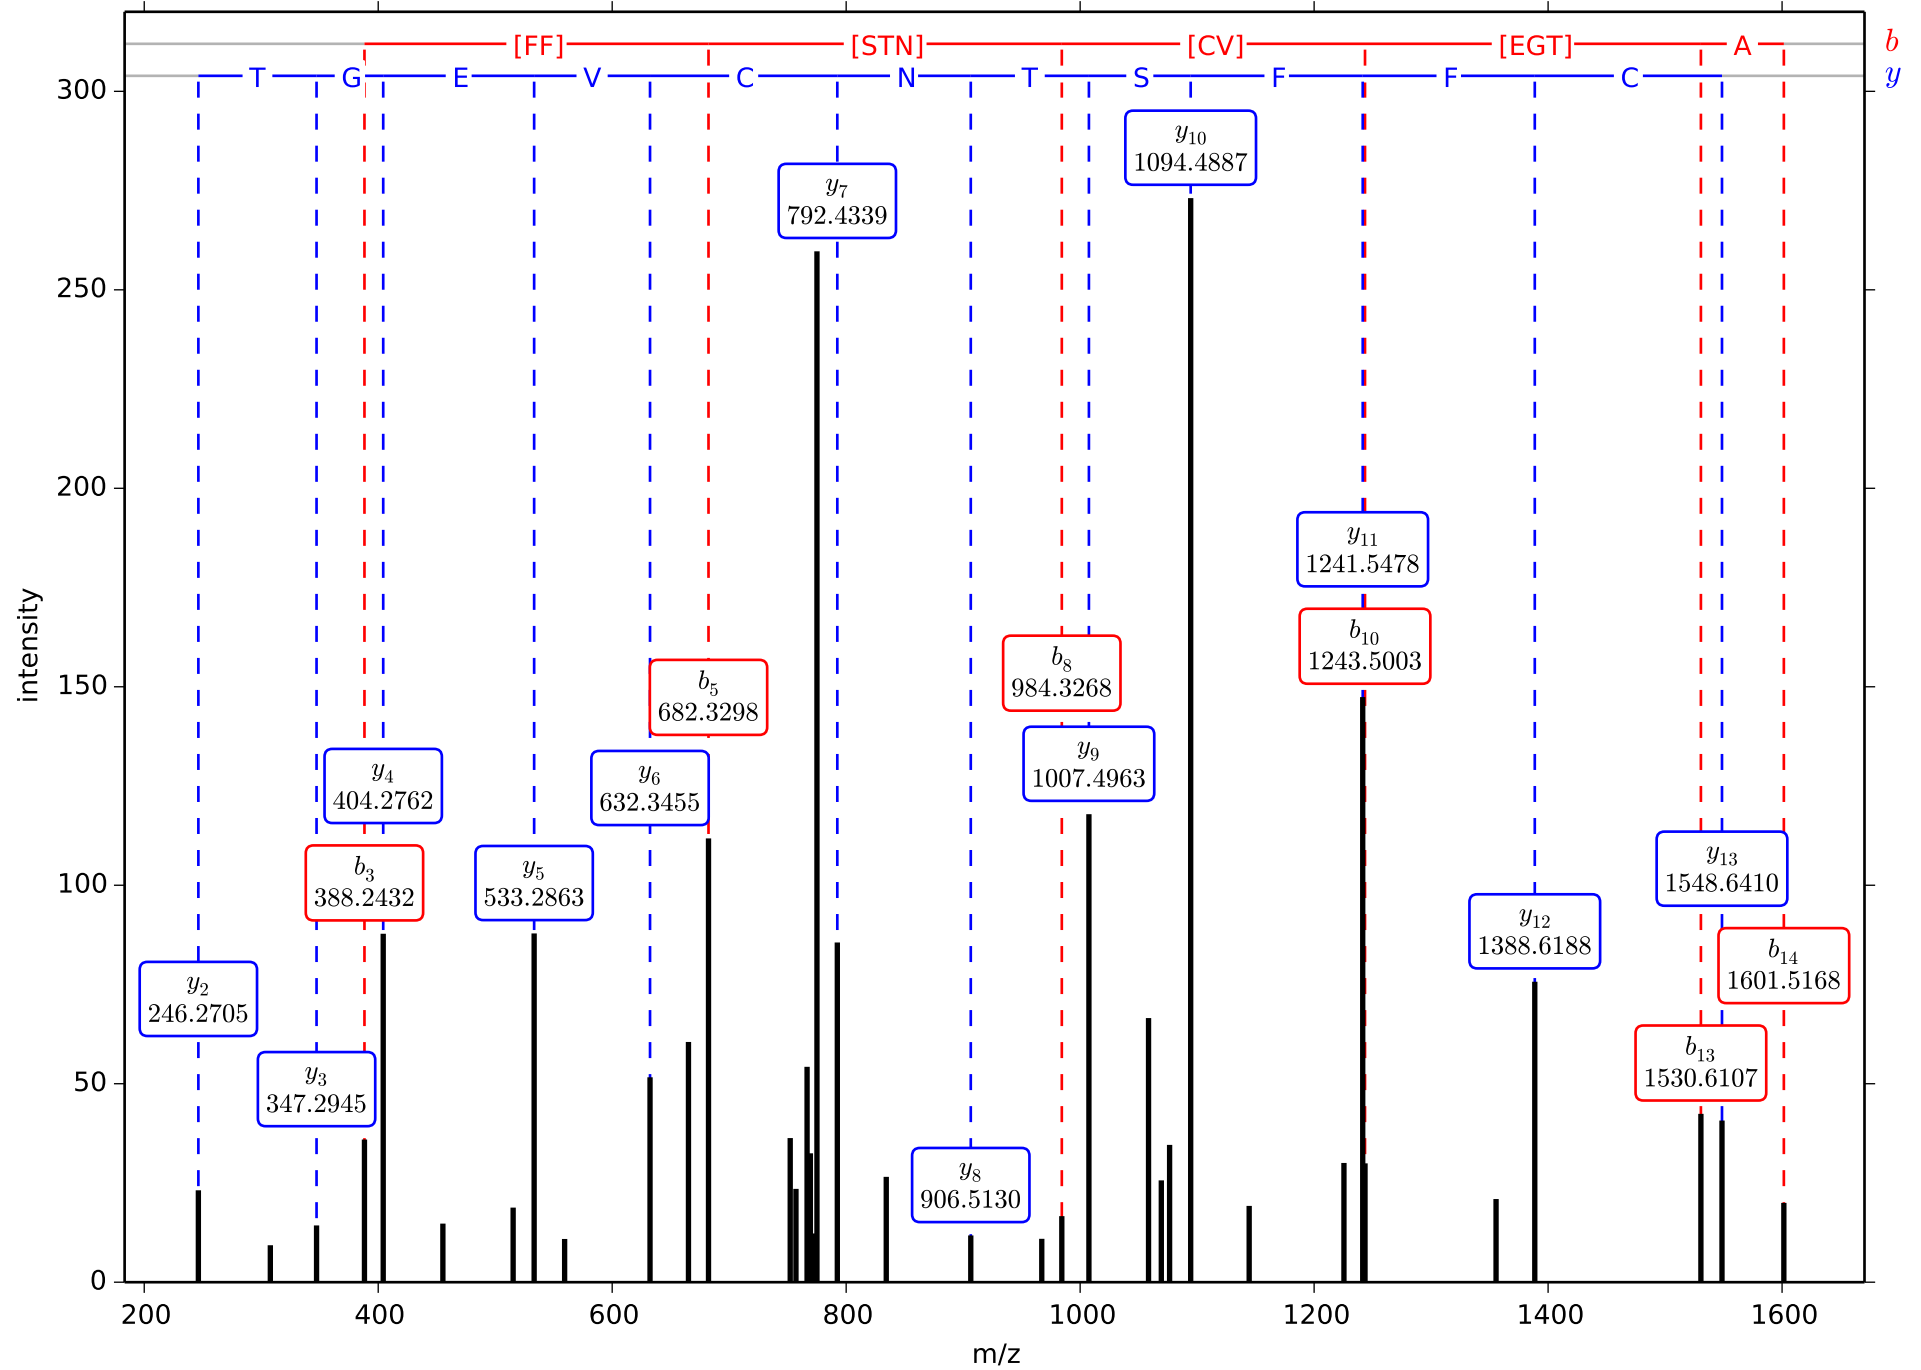



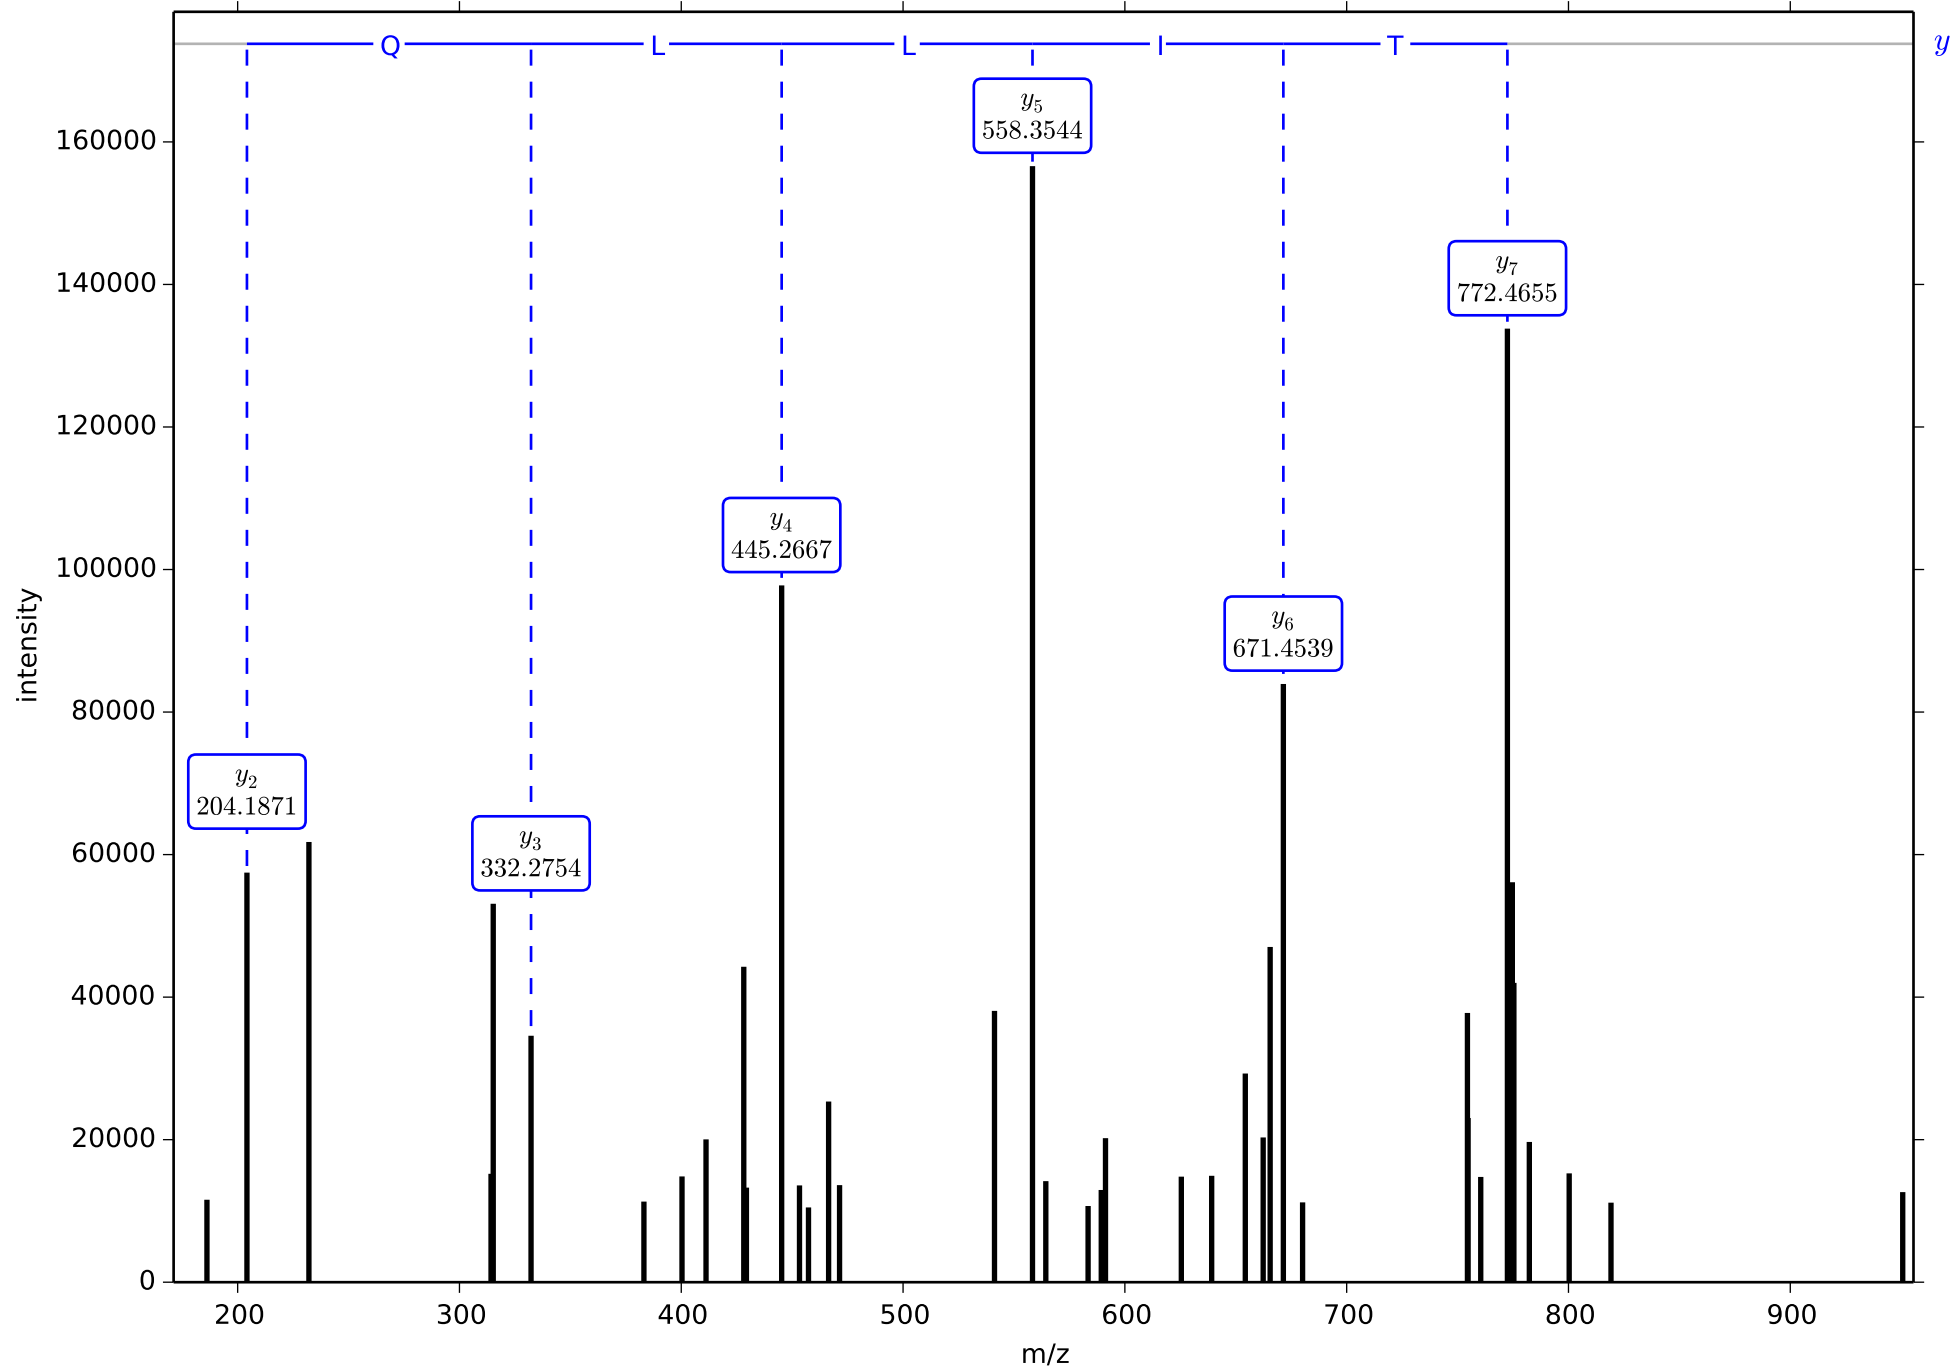

# Q6PIC6 : LIVEGCQR

parent: 544.303560,2+

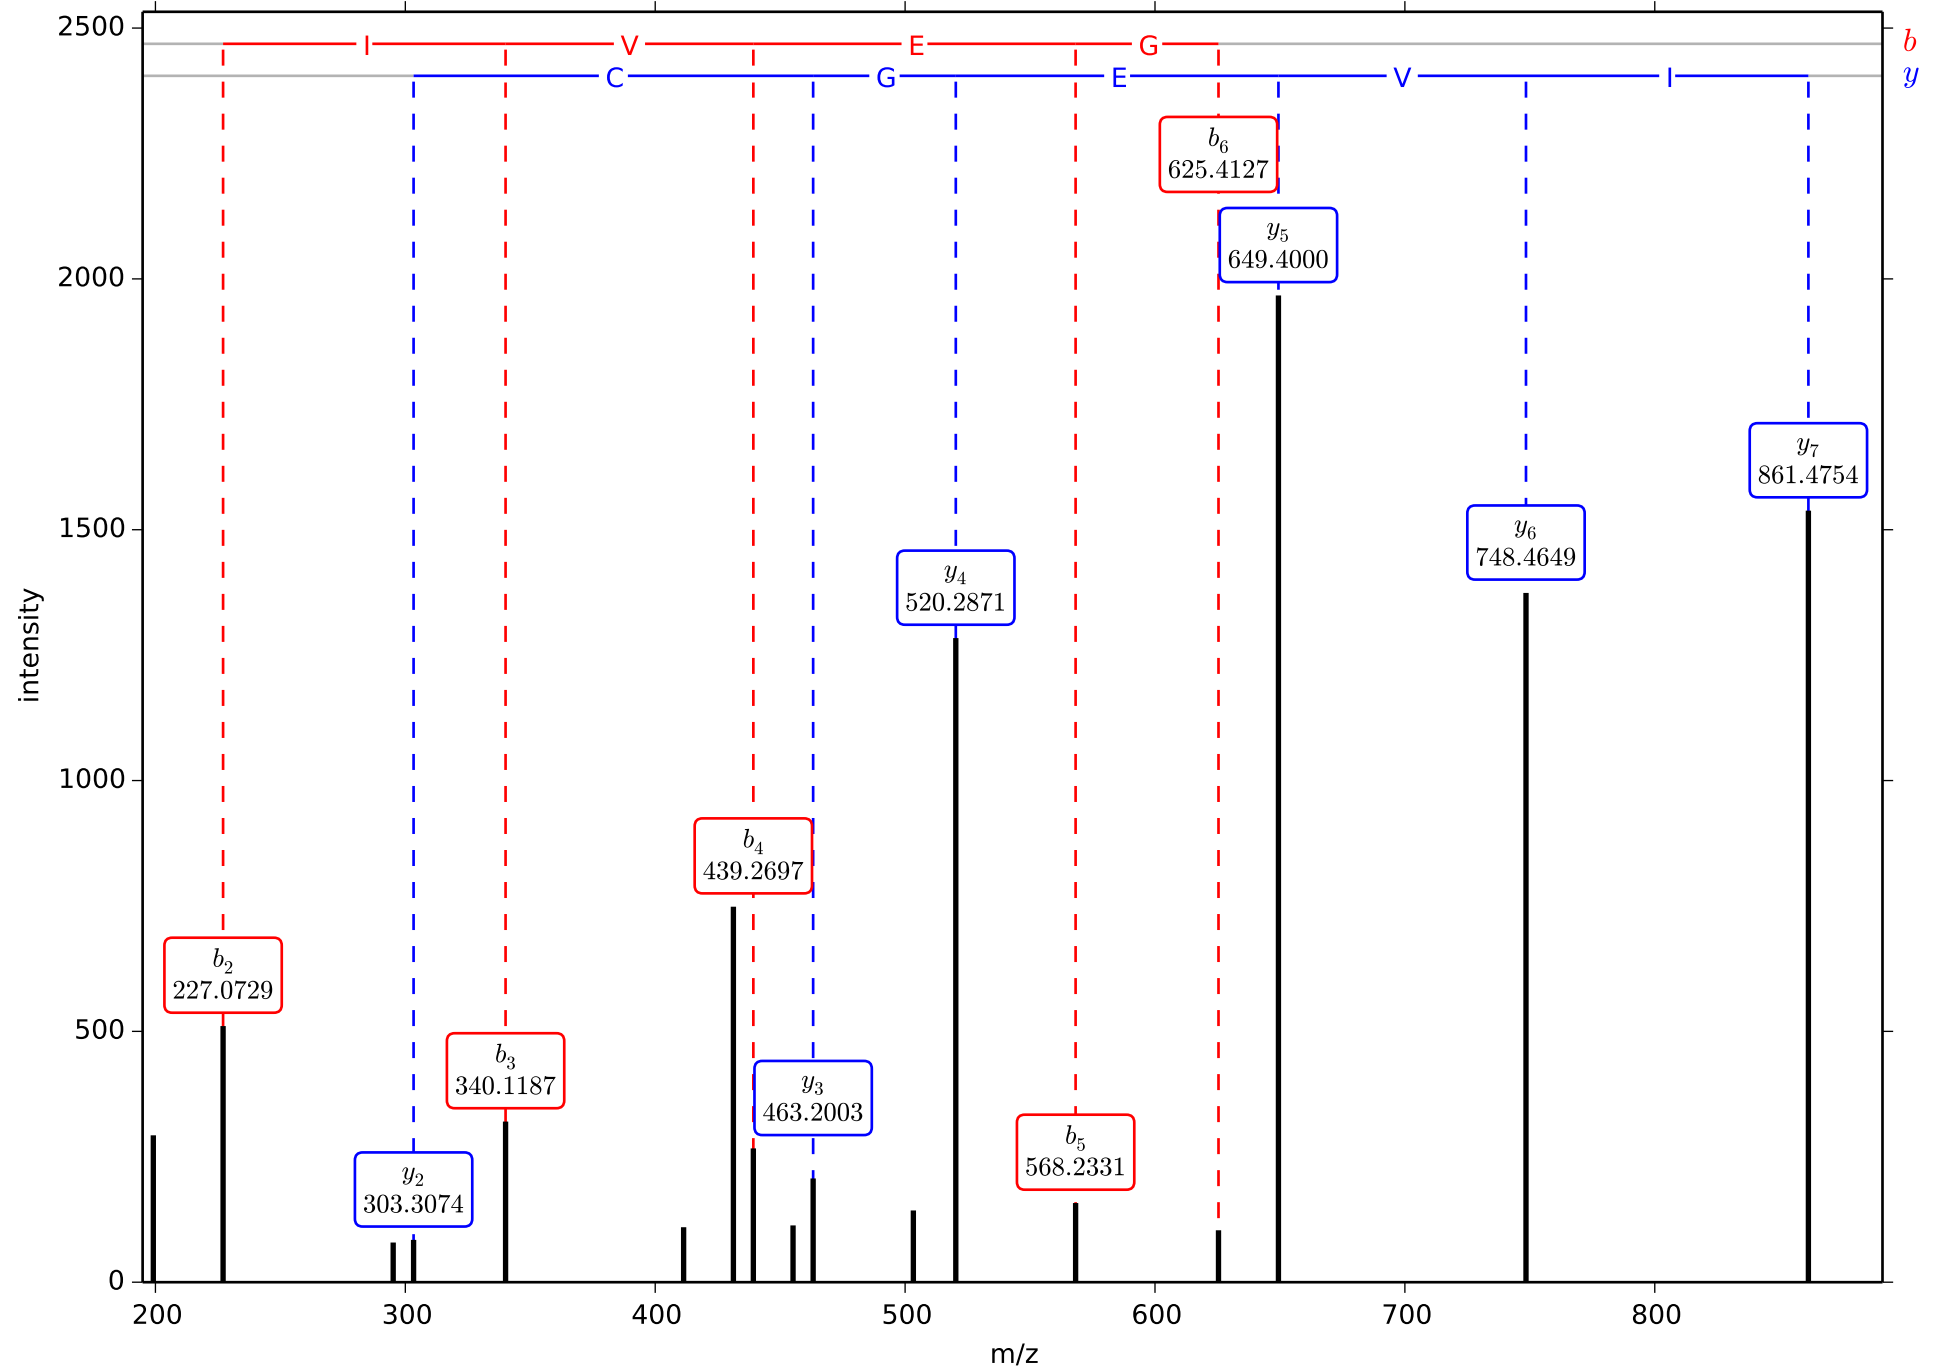

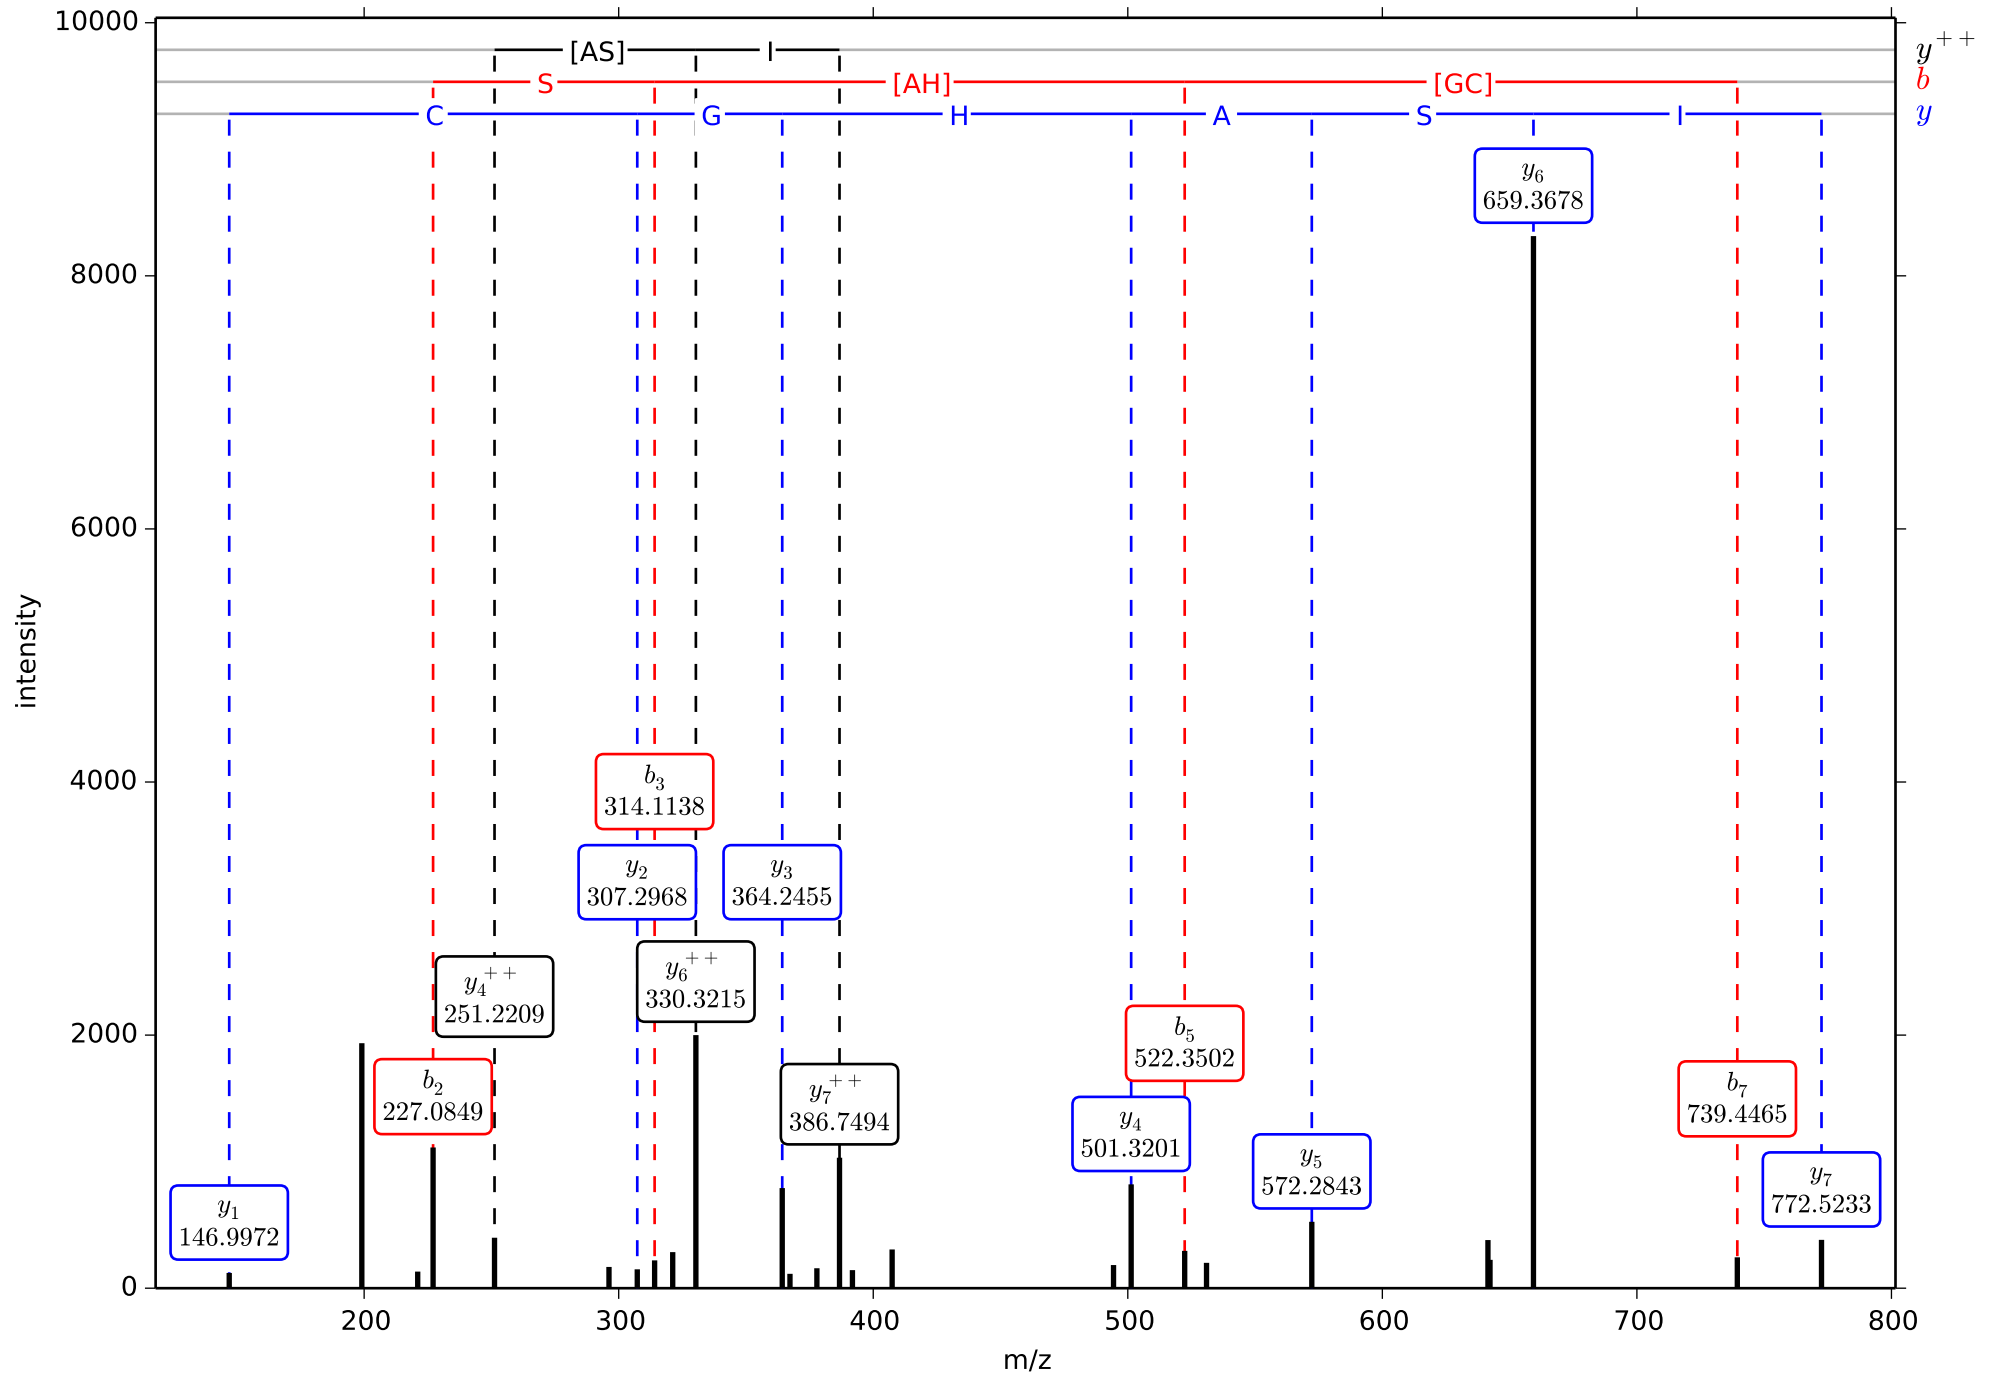

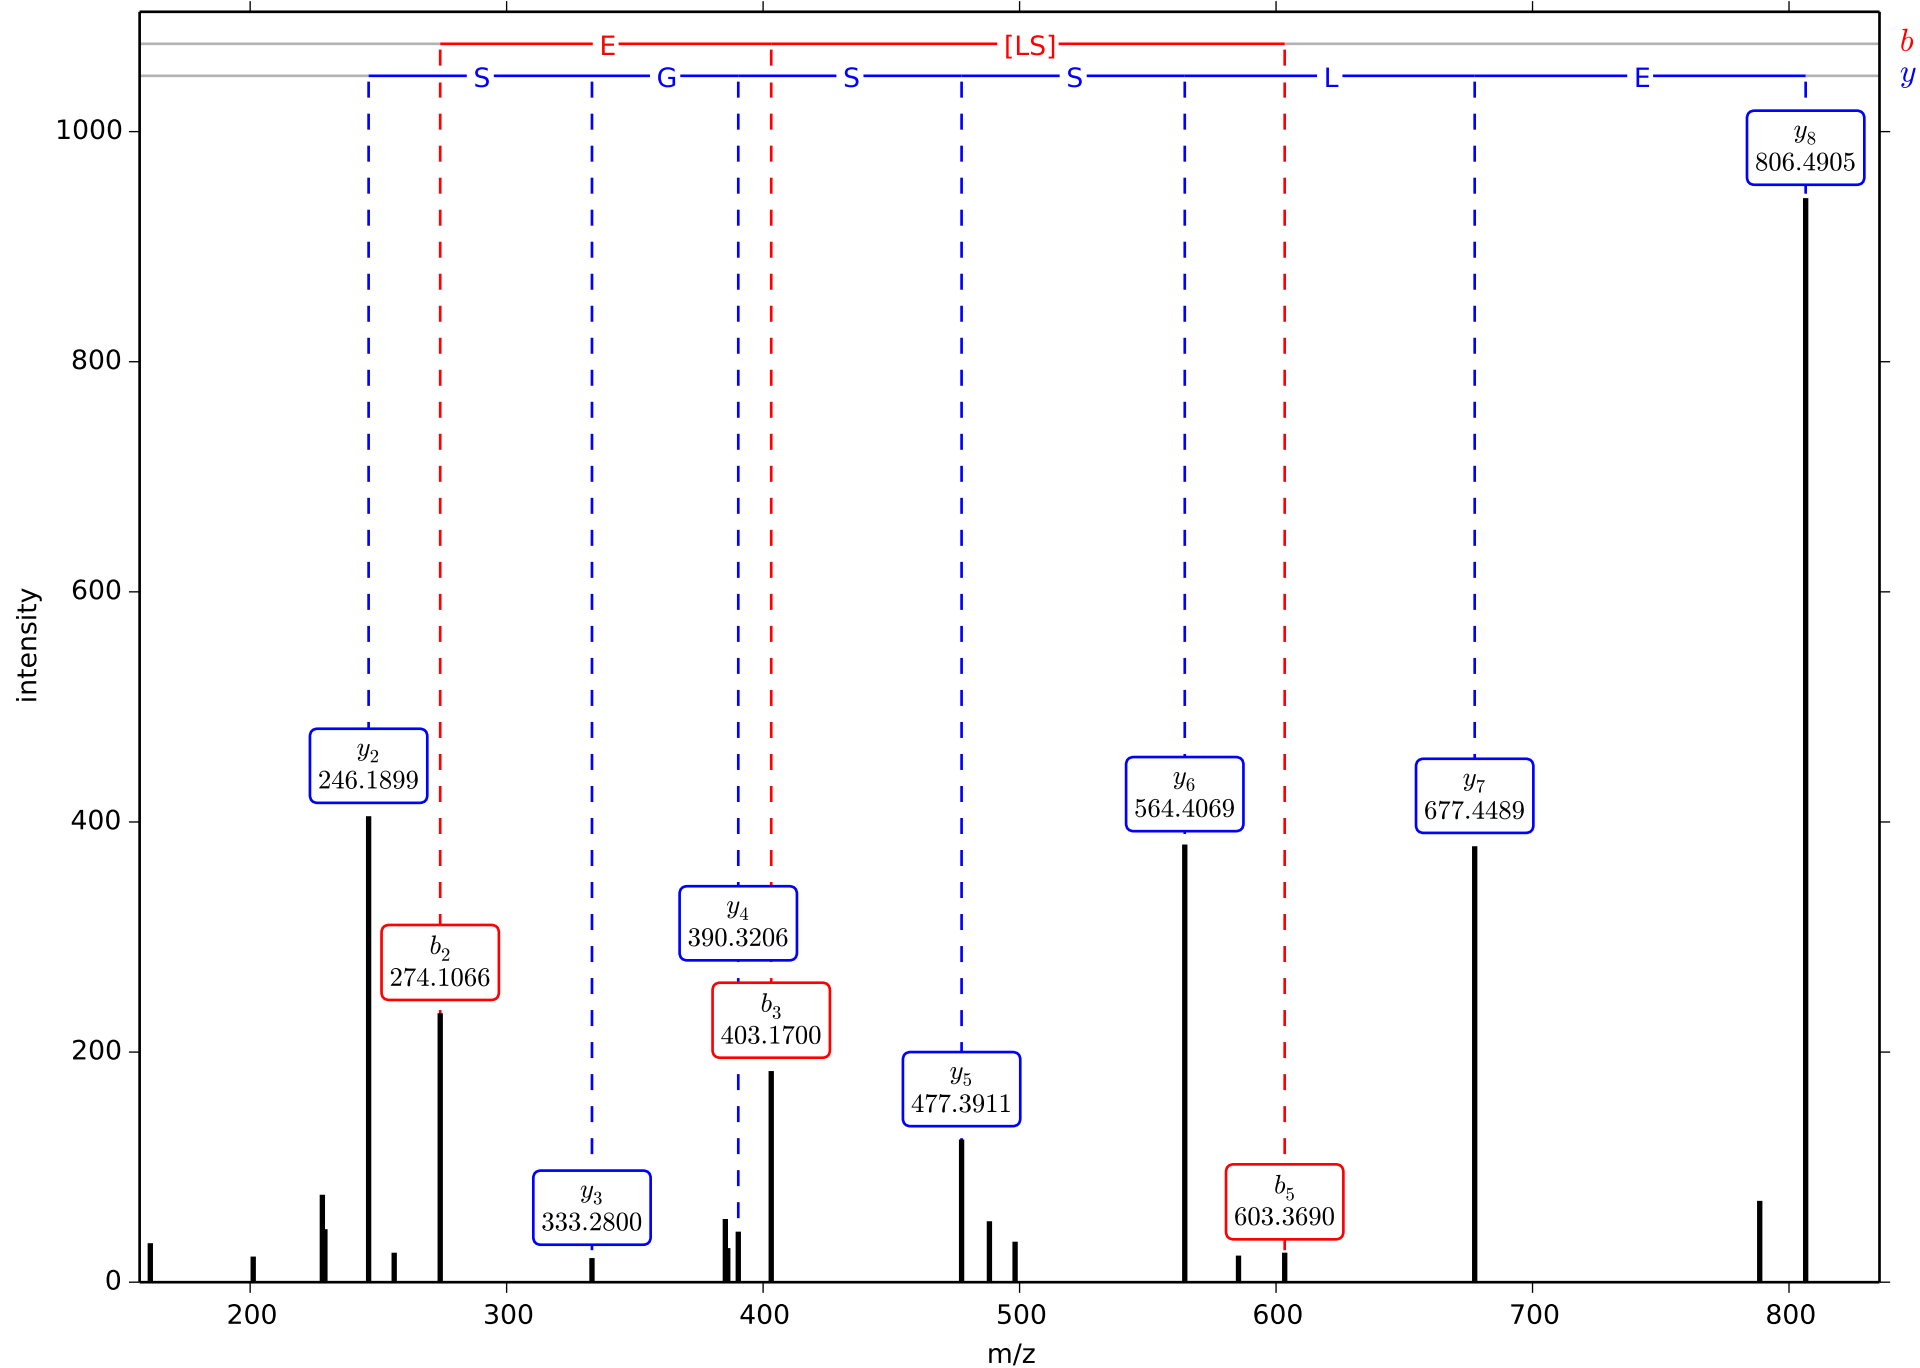

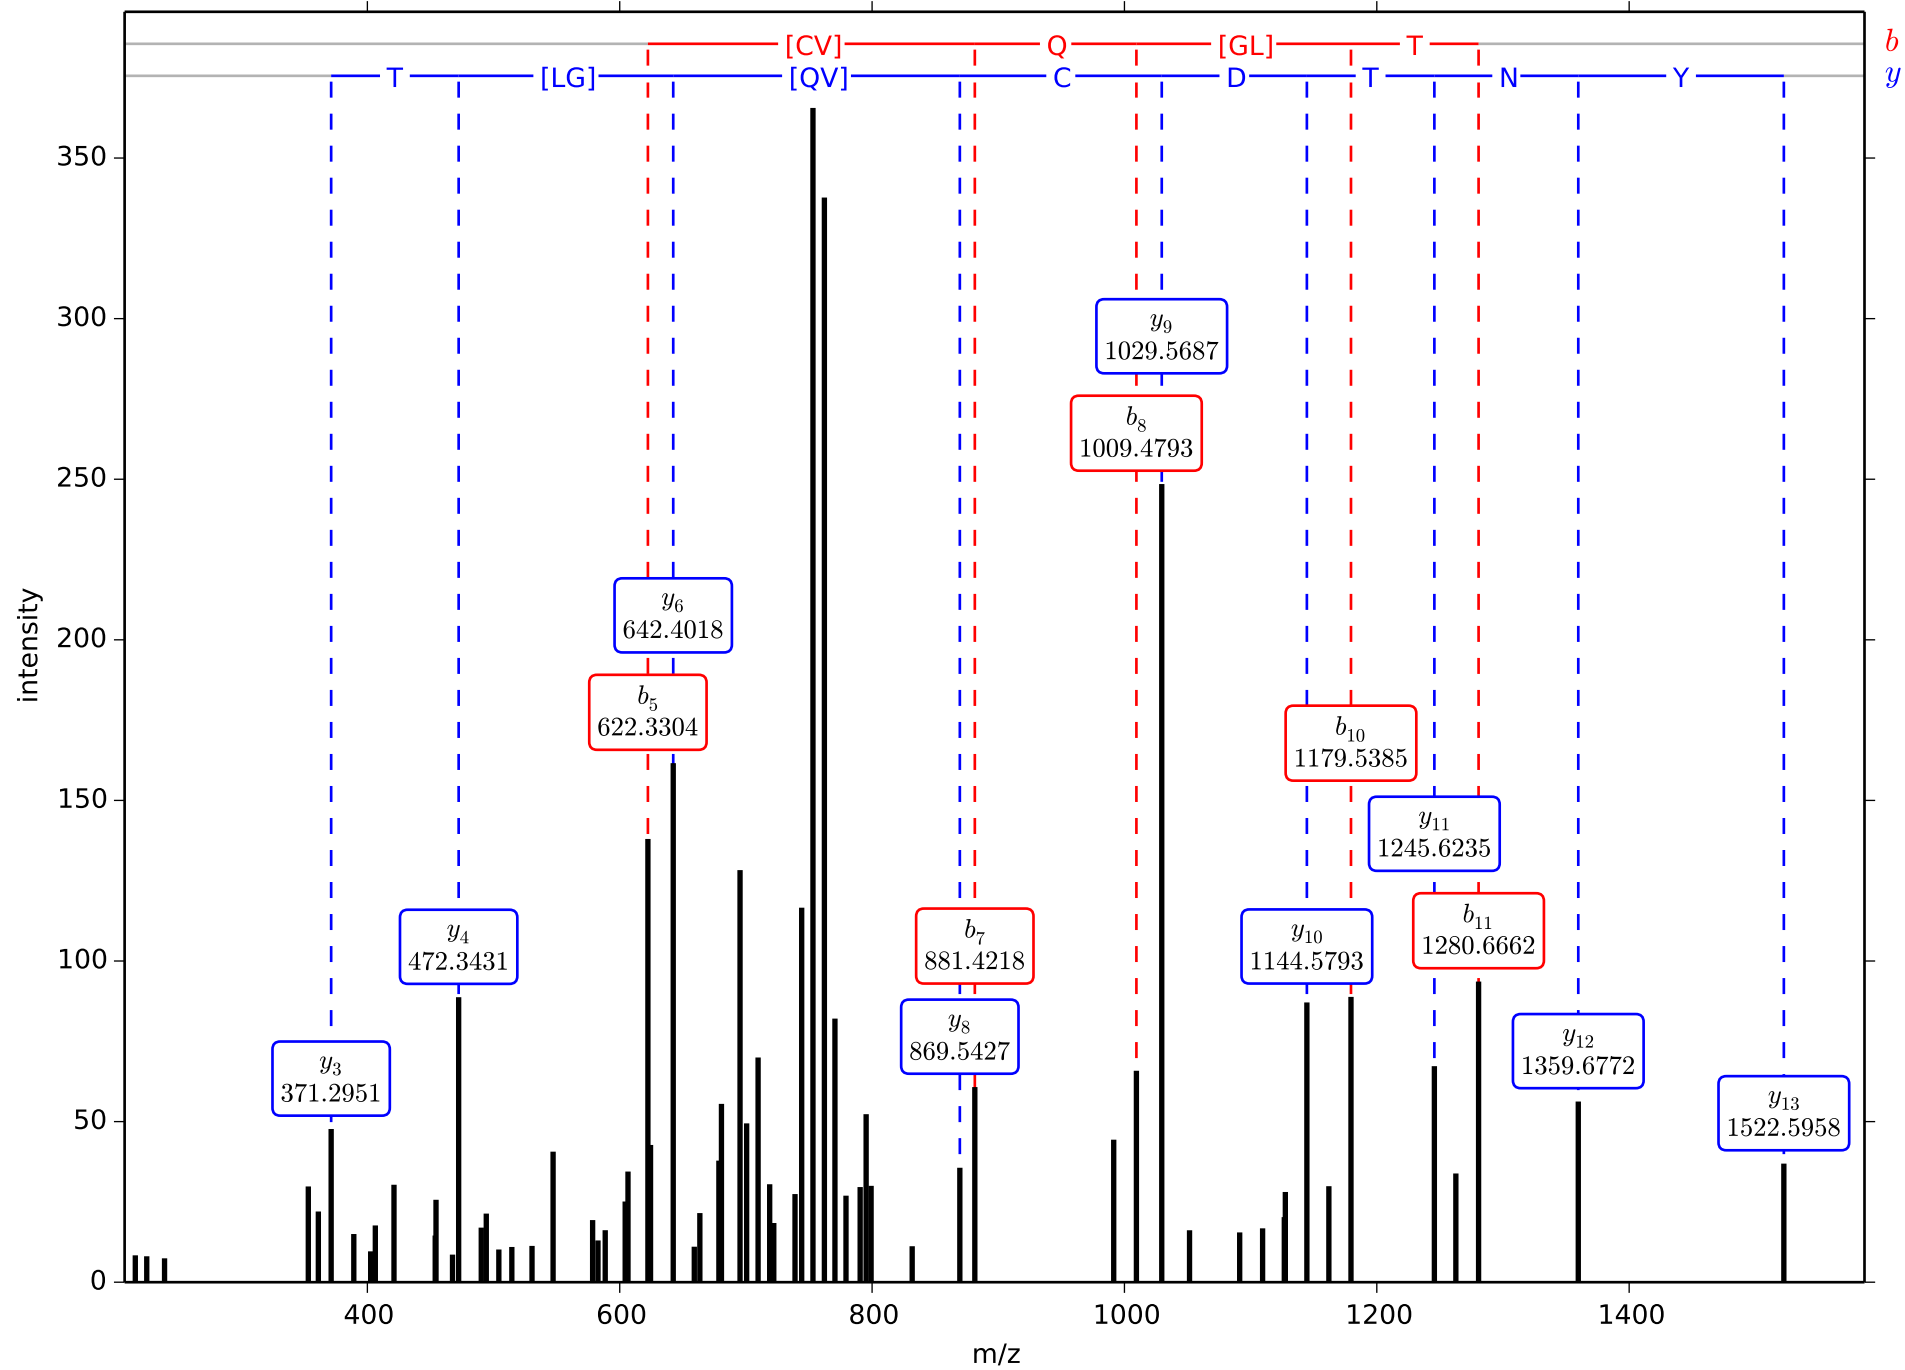

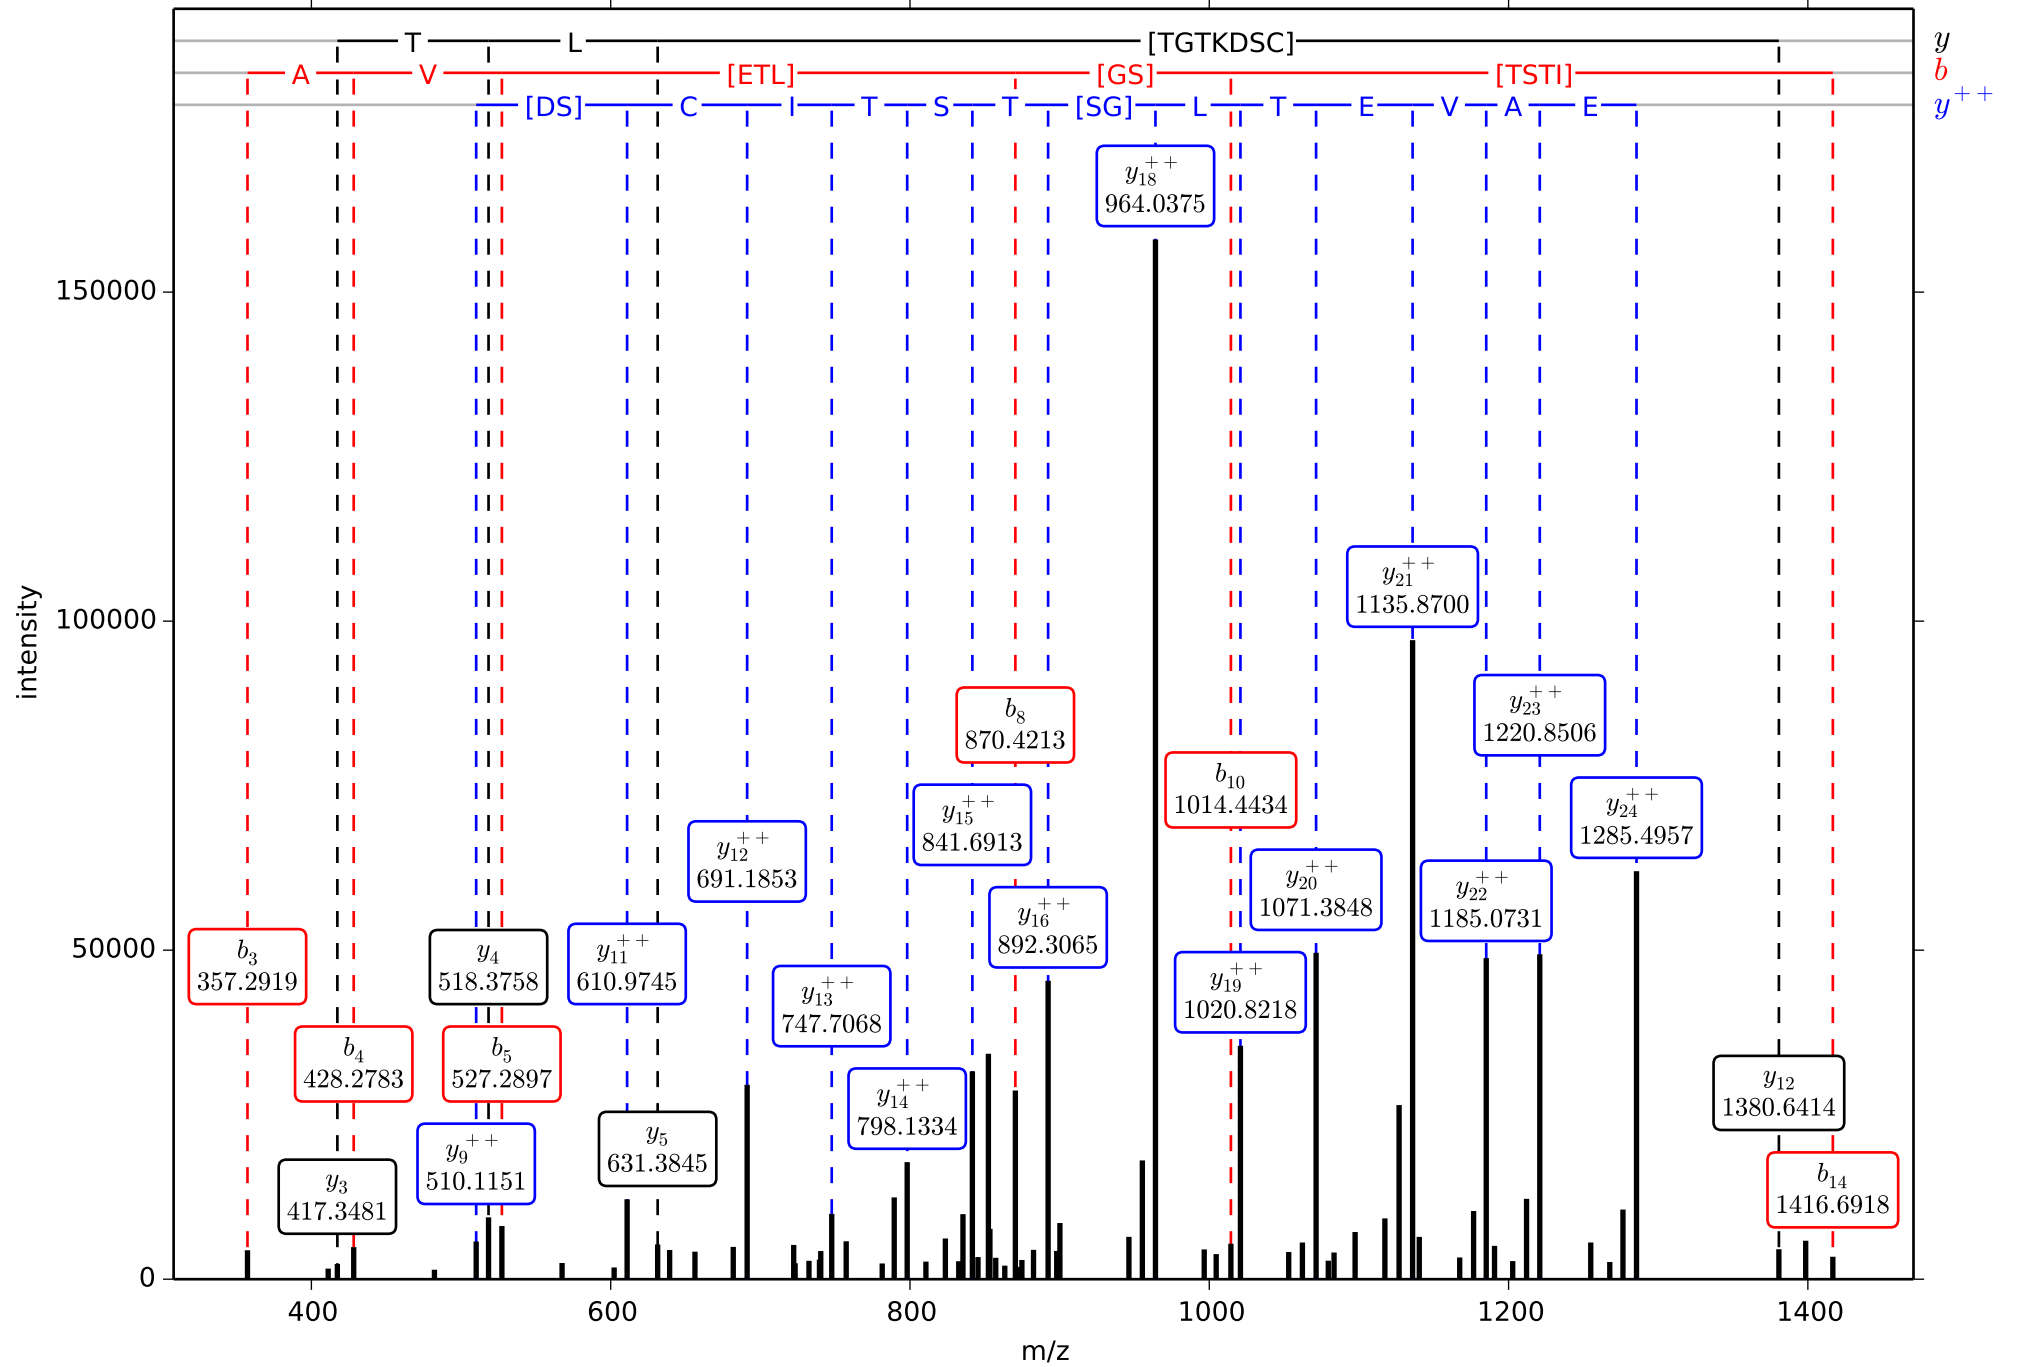

Q6PIC6 : NLEAVETLGSTSTICSDK

parent: 962.957640,2+

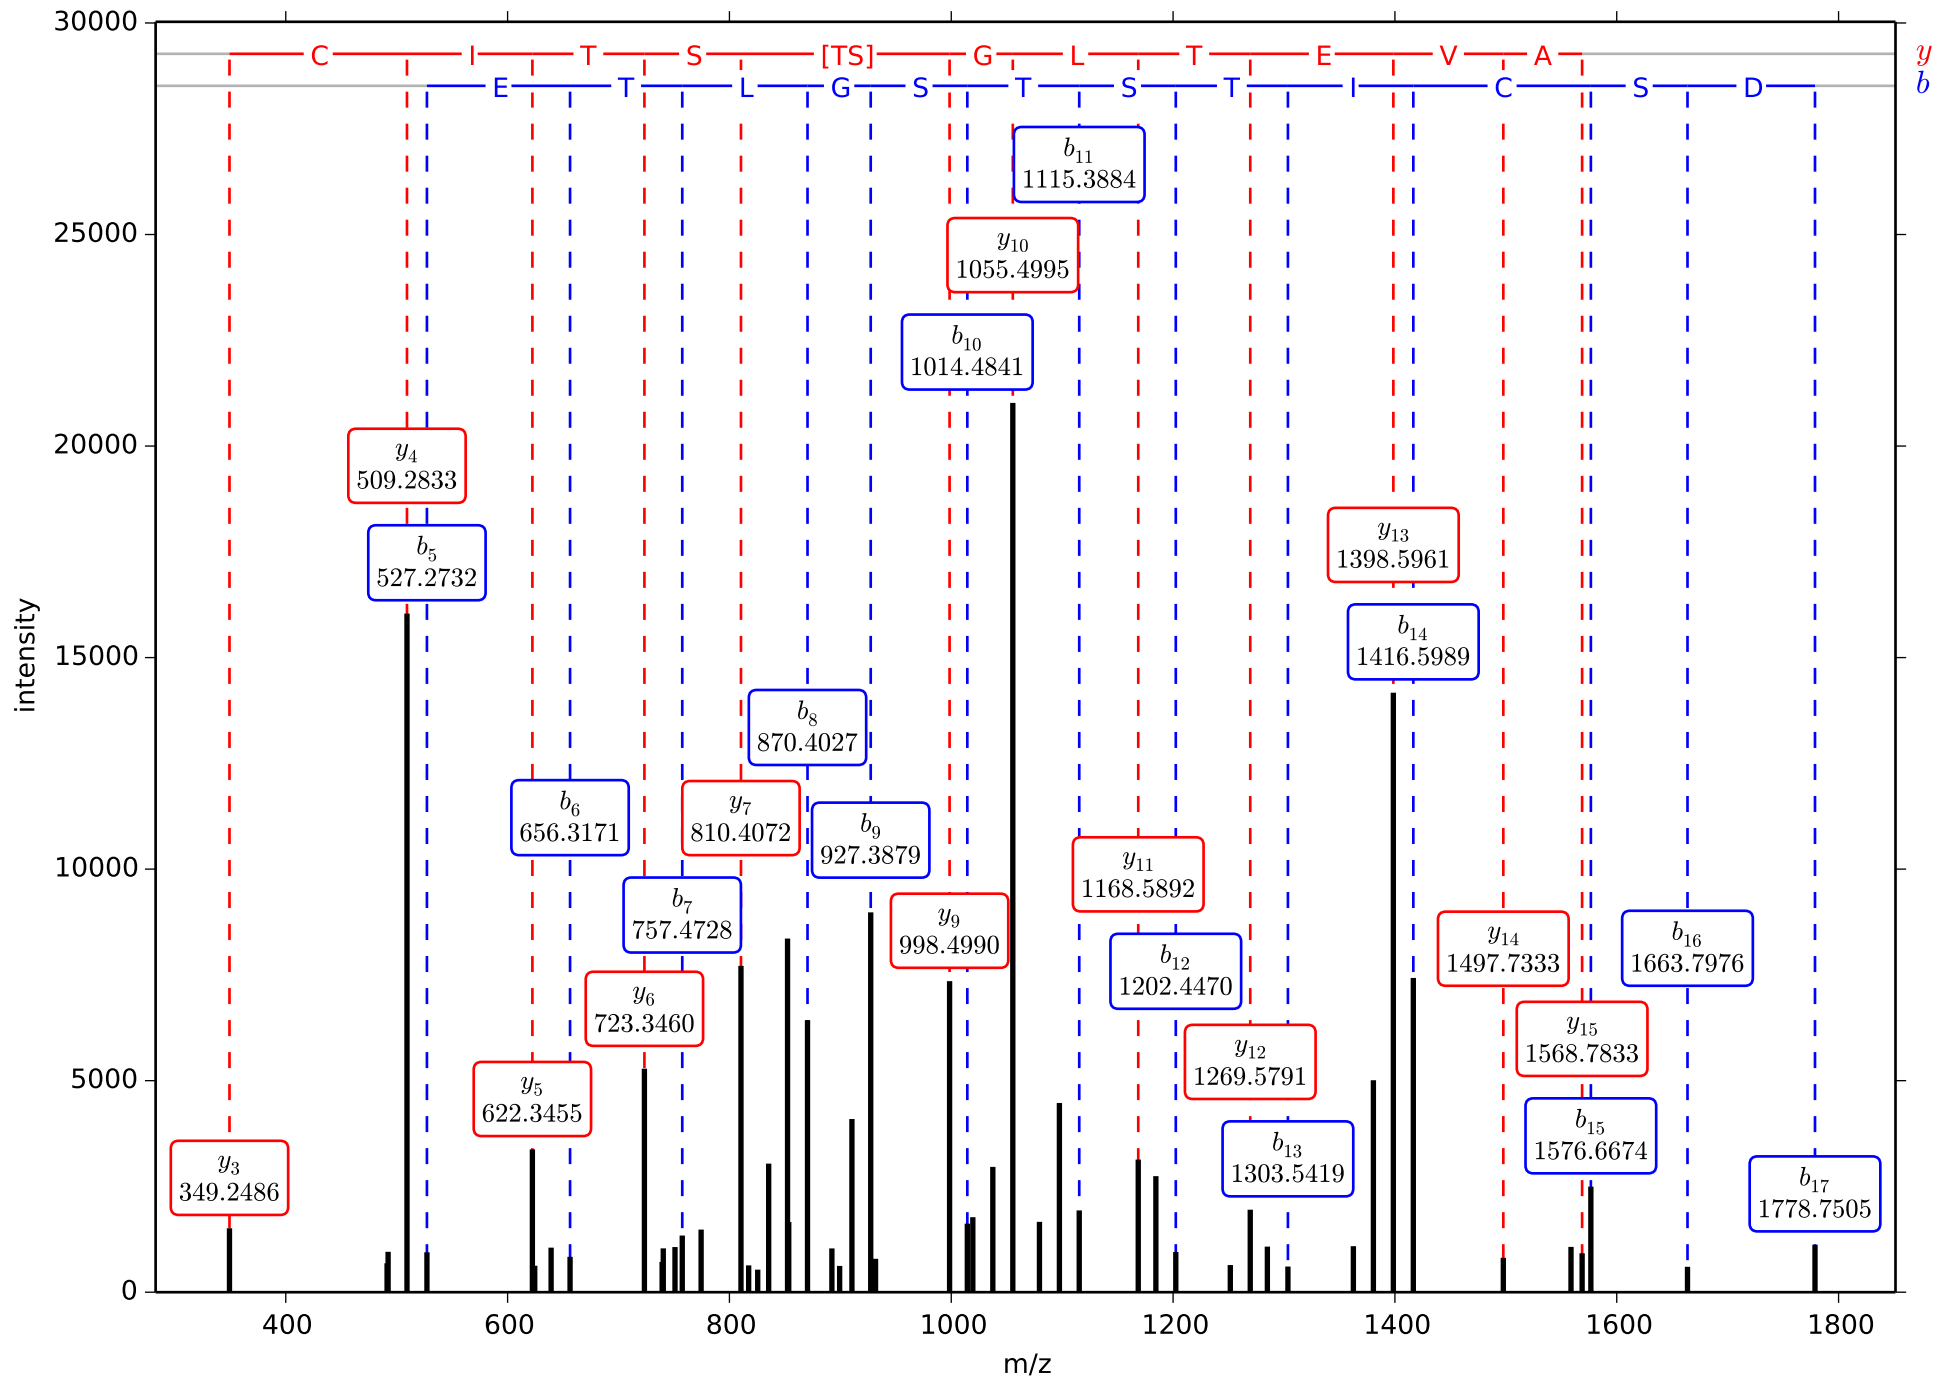

Q6PIC6 : NITFFSTNCVEGTAR

parent: 858.902580,2+

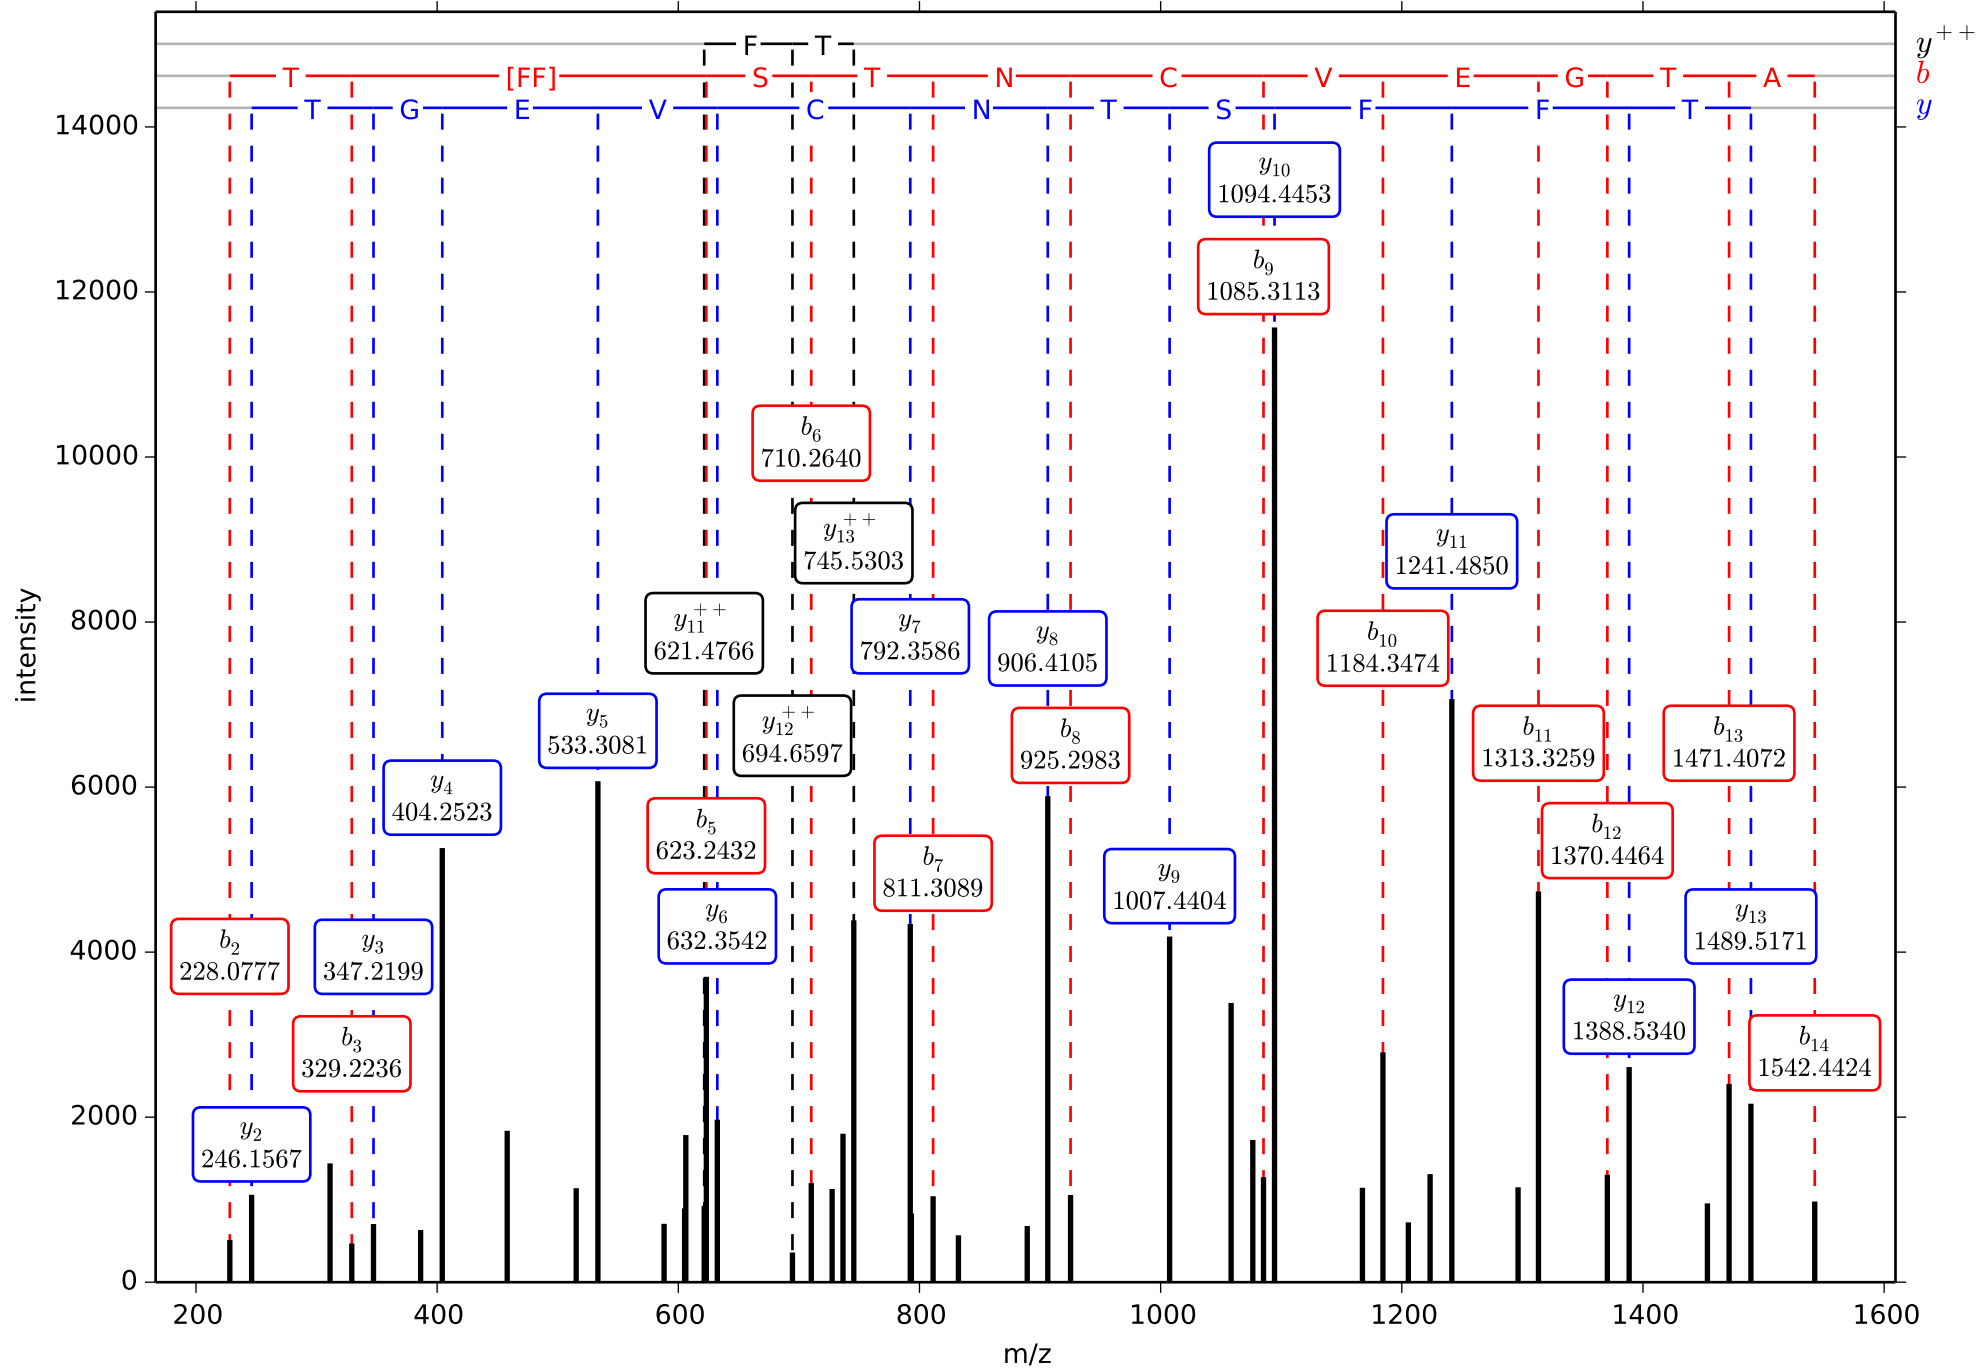



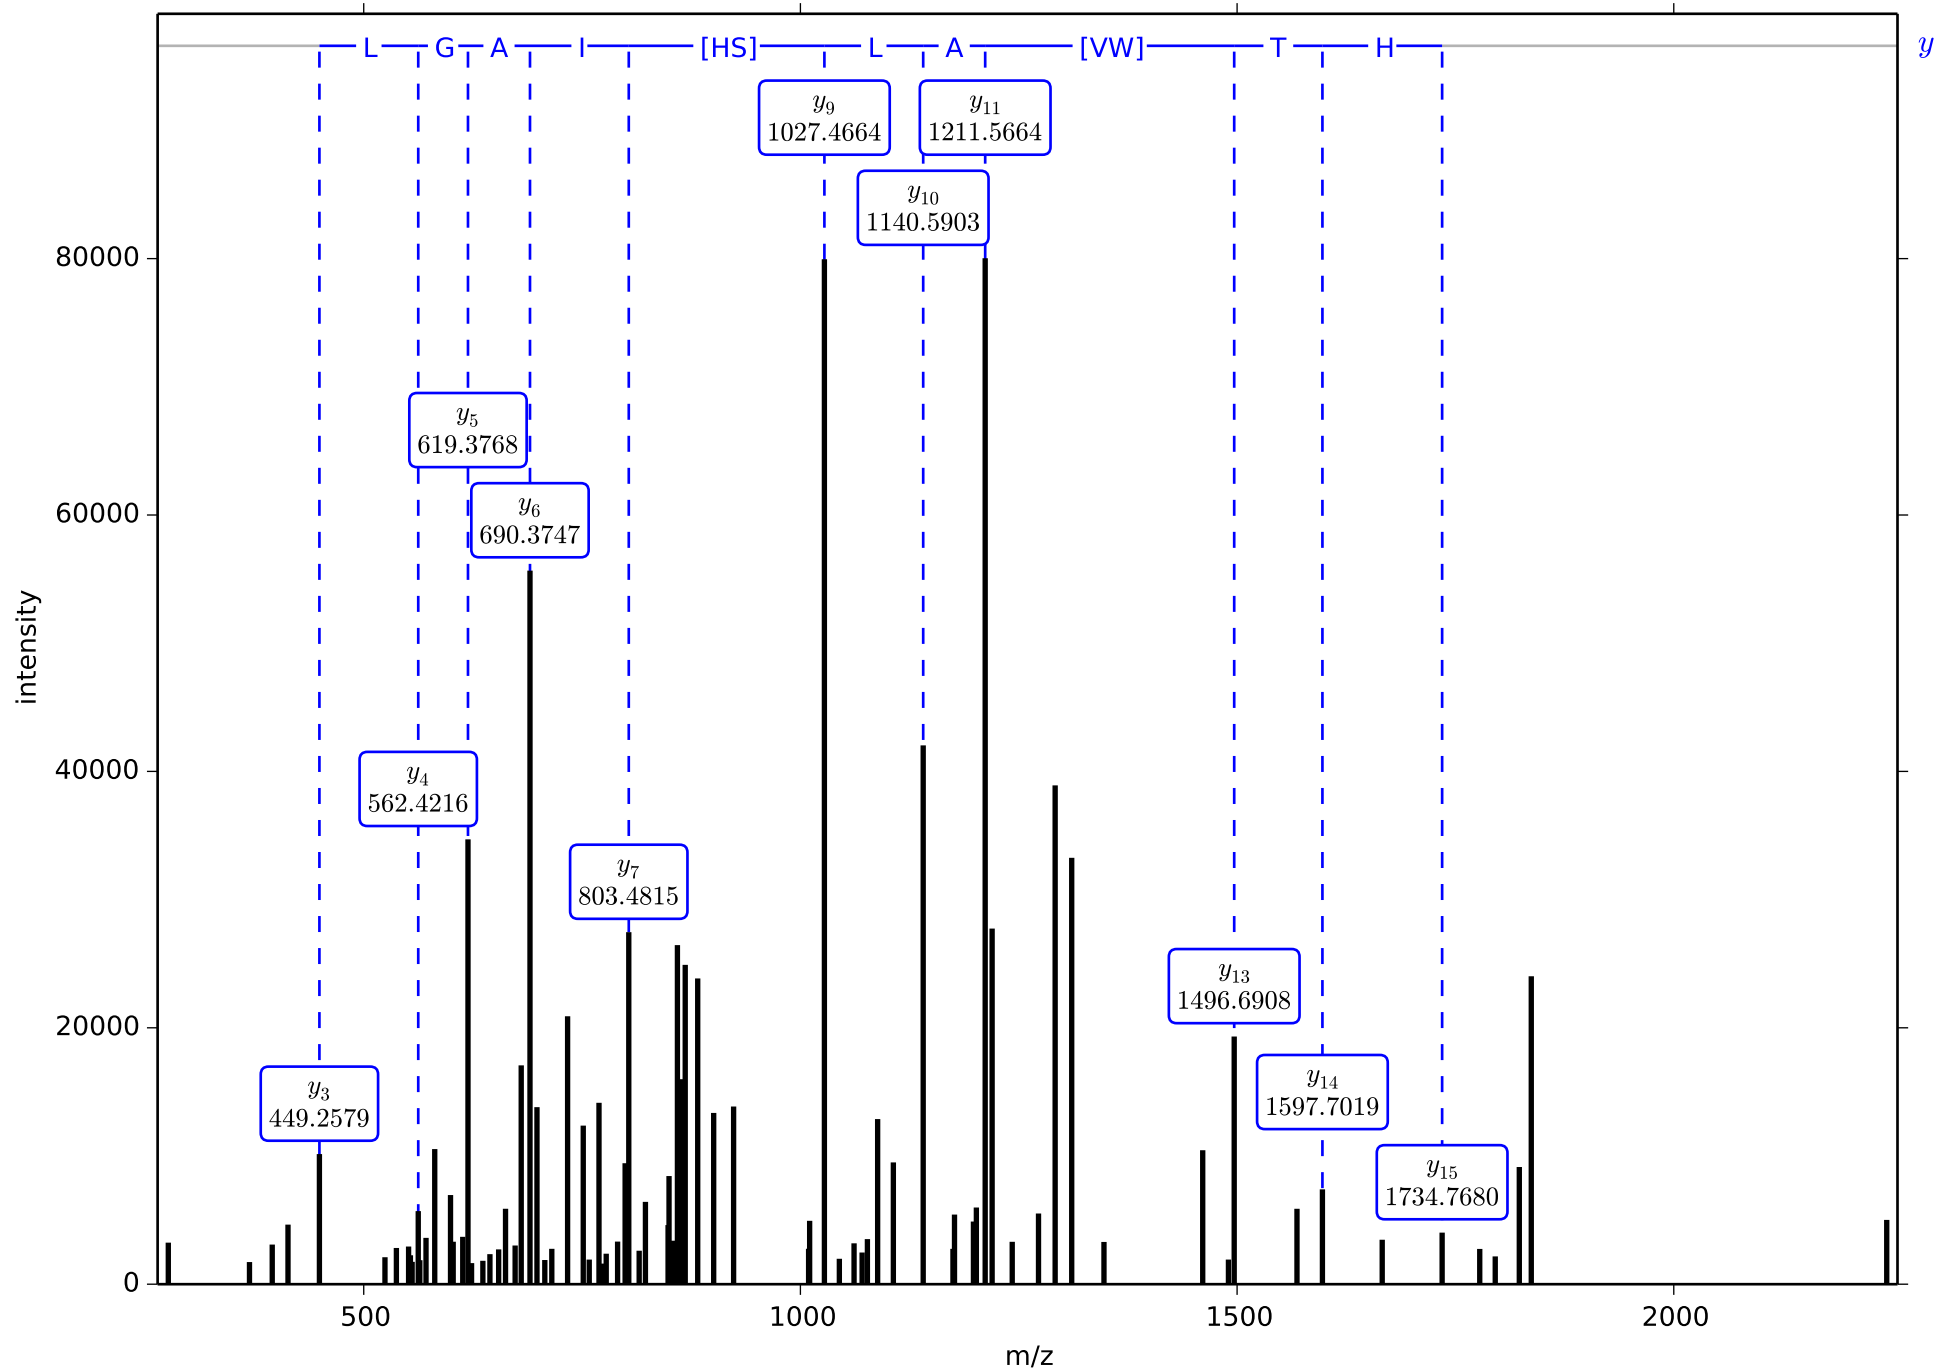

Q6PIC6 : ACVIHGTDLKDFTSEQIDEILQNHTEIVFAR

parent: 900.713000,4+

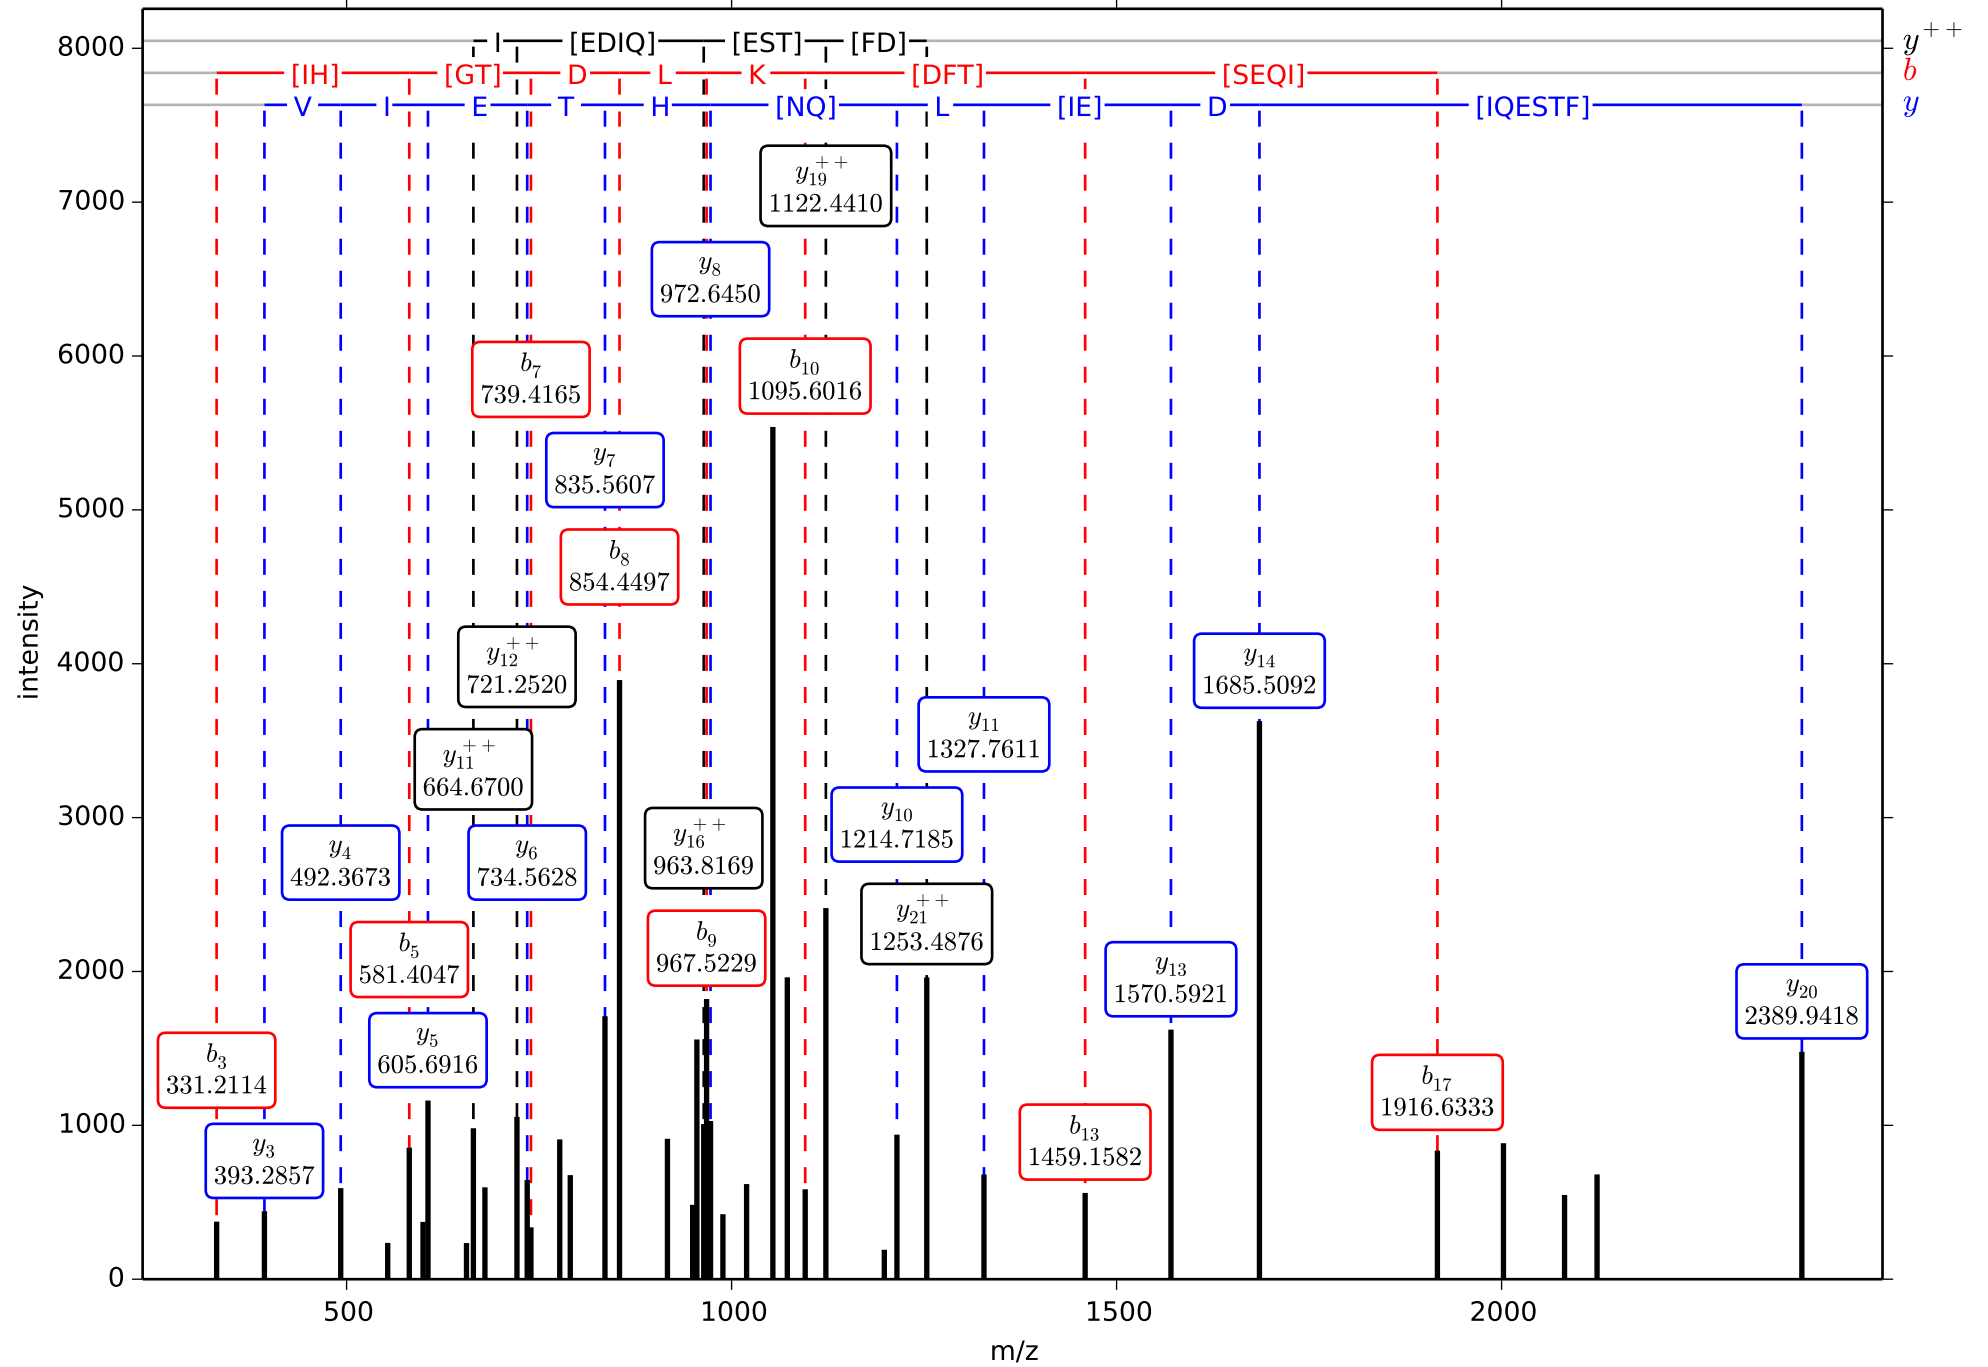

Q6PIC6 : YNTDCVQGLTHSK

parent: 761.857090,2+

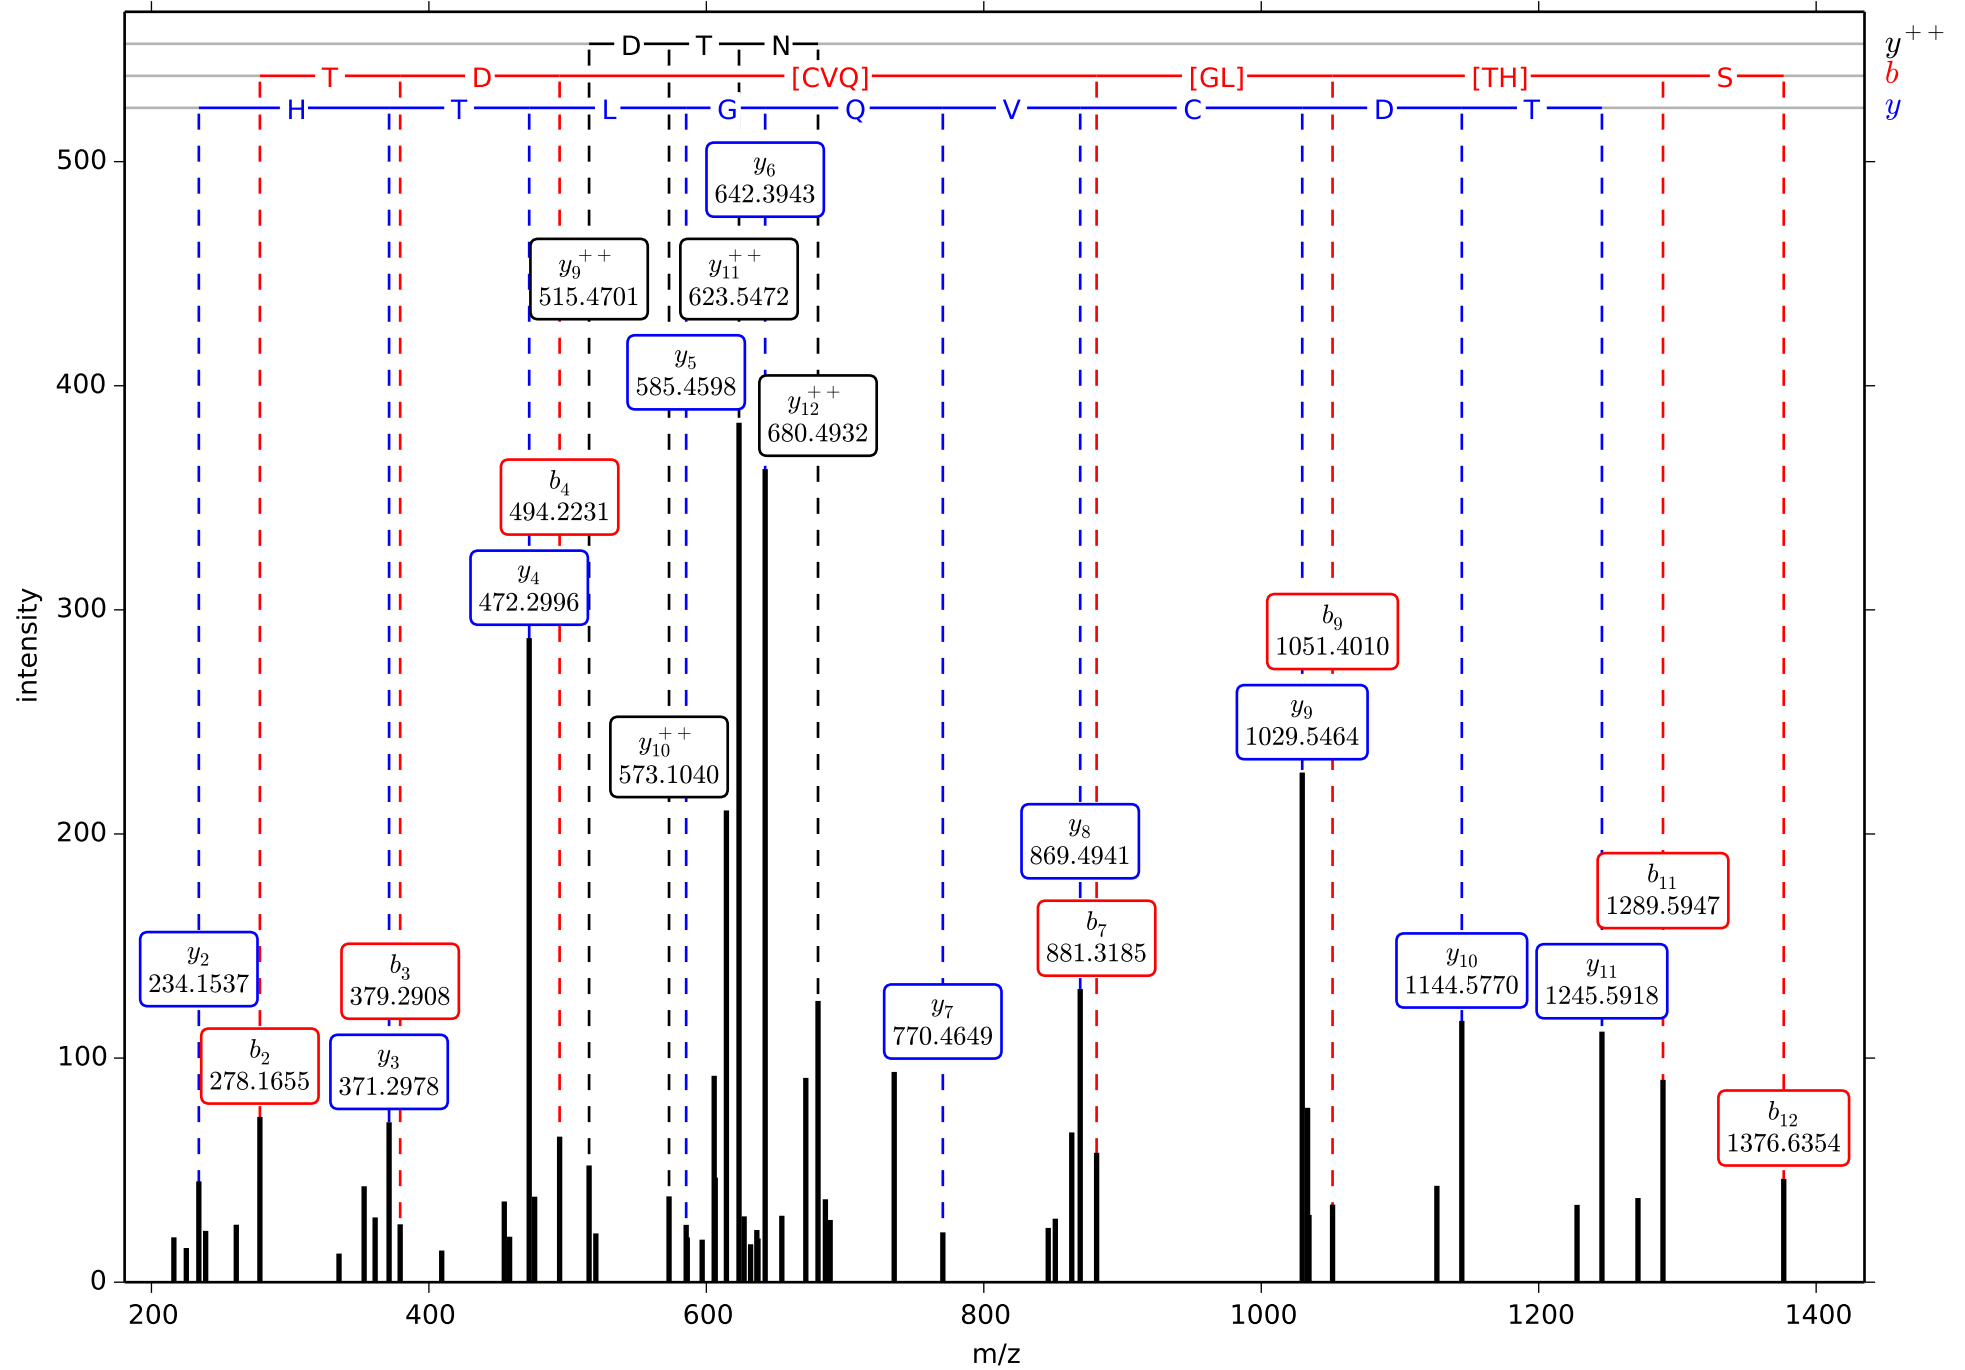

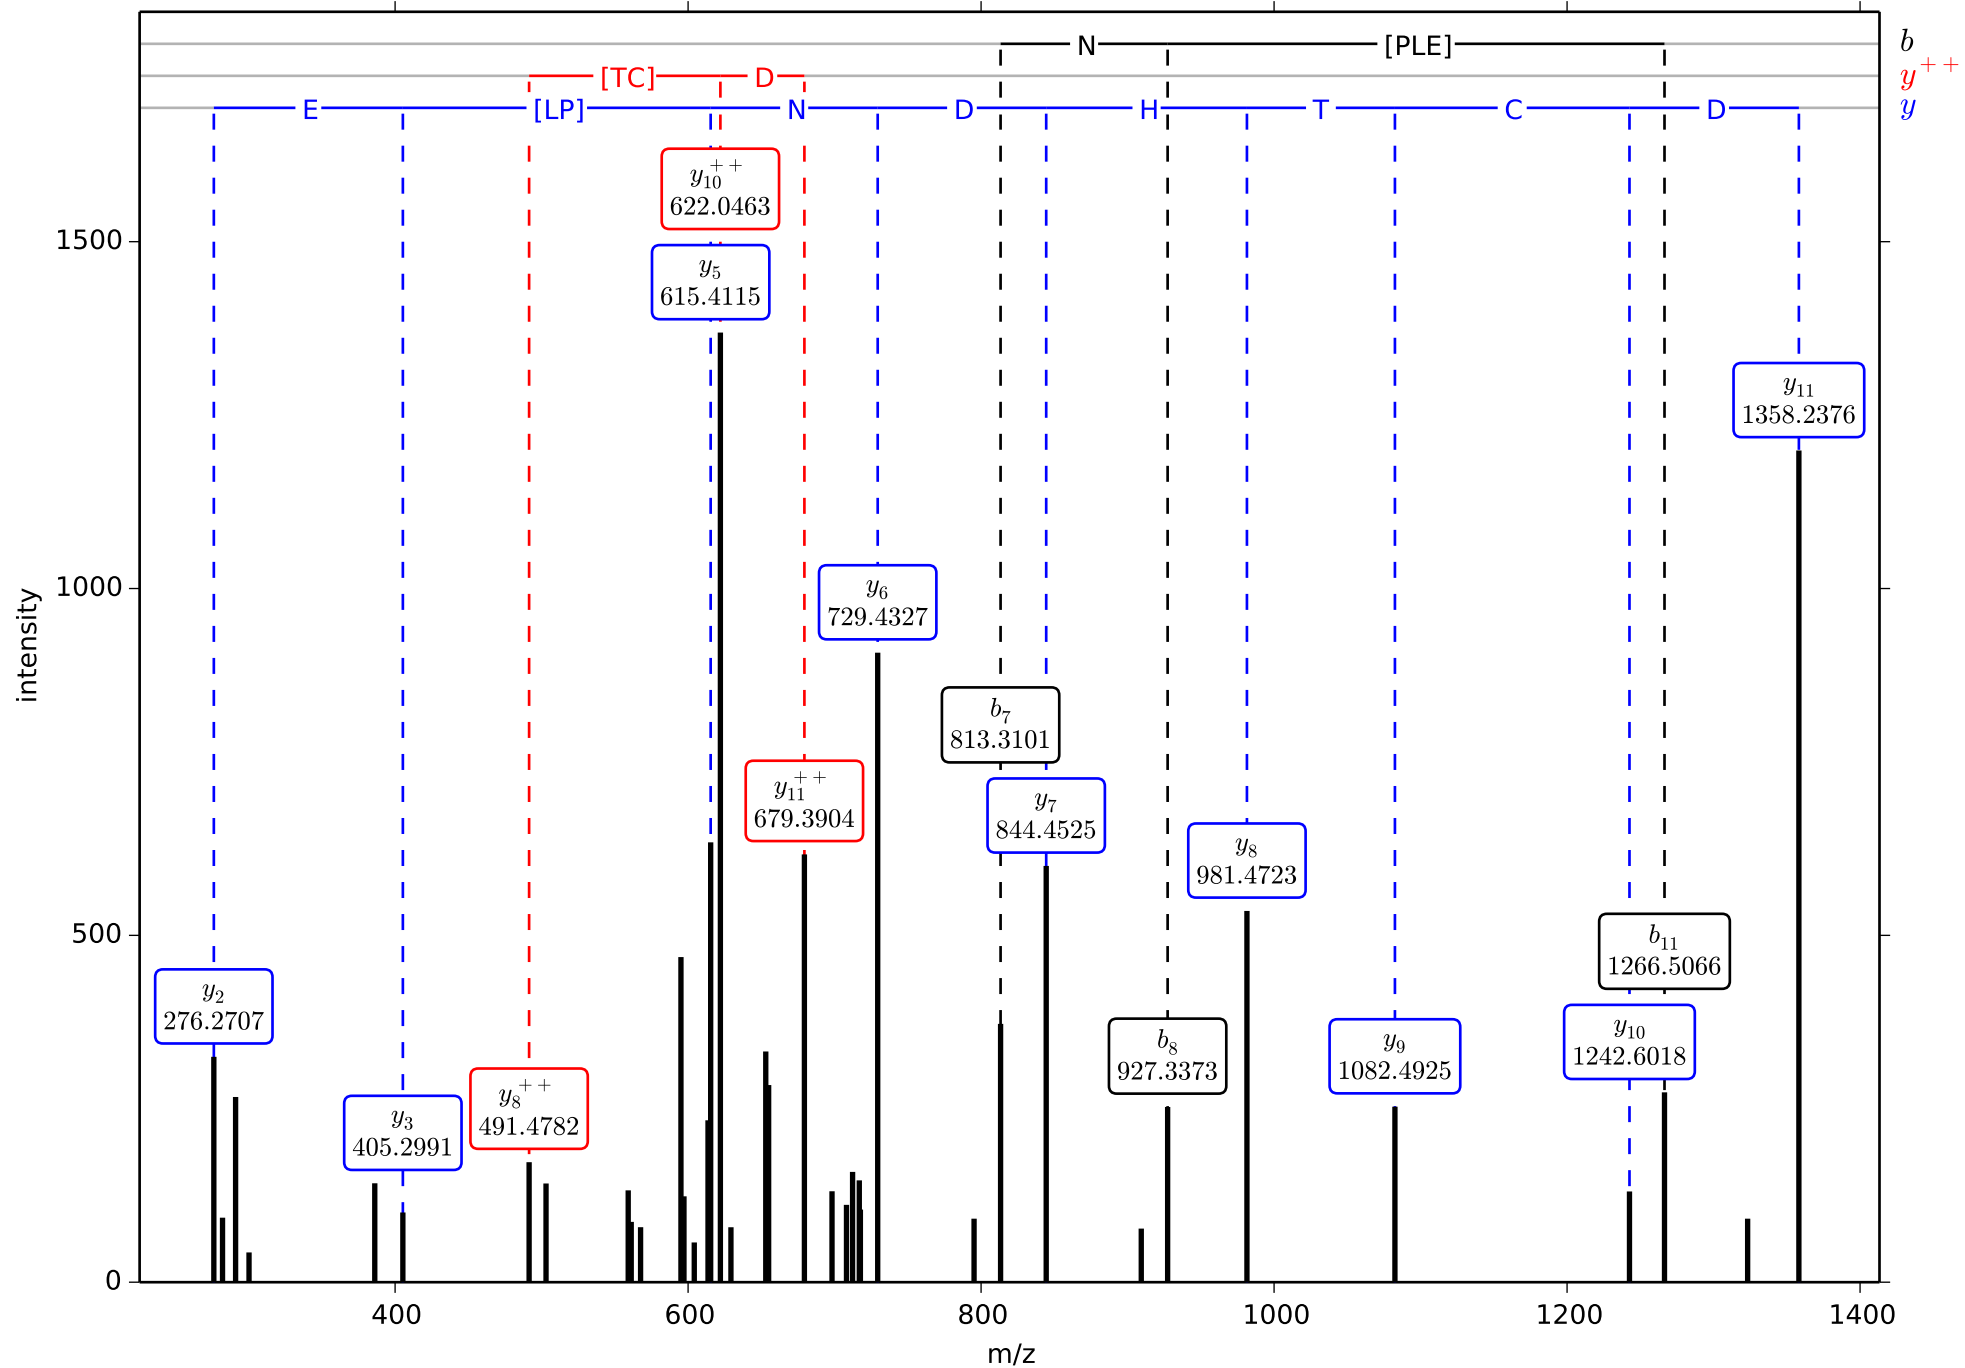

Supplement: supp_M113.036079_mcp.M113.036079-2.pdf [file supp_M113.036079_mcp.M113.036079-2.pdf]
